# Supplementary material for: Microbiome Composition and Microbial Community Structure in Mosquito Vectors Aedes aegypti and Aedes albopictus in Northeastern Thailand, a Dengue-Endemic Area
Source: Insects. 2023 Feb 13;14(2):184. doi: 10.3390/insects14020184 (PMC9961164; doi:10.3390/insects14020184)
Supplement: Supplementary file 1 [file insects-14-00184-s001.zip]

Archive with 7 entries (7 files):
- insects-2193863 Figure S1.pdf
- Table S1_28-12-22.xlsx
- Table S2_28-12-22.xlsx
- Table S3_28-12-22.xlsx
- Table S4_28-12-22.xlsx
- Table S5_28-12-22.xlsx
- Table S6_28-12-22.xlsx
