# Supplementary material for: Microbiome Composition and Microbial Community Structure in Mosquito Vectors Aedes aegypti and Aedes albopictus in Northeastern Thailand, a Dengue-Endemic Area
Source: Insects. 2023 Feb 13;14(2):184. doi: 10.3390/insects14020184 (PMC9961164; doi:10.3390/insects14020184)
Supplement: Supplementary file 1 [file insects-14-00184-s001.zip › Table S1_28-12-22.xlsx]

## Sheet: Tags_stat
Table S1. Basic statistics of the sequencing data and OTUs for each sample.
Sample Name	Raw reads	Clean reads	Effective reads	Base(nt)	AvgLen(nt)	Q20	GC%	Effective%	Taxon reads	Unclassified reads	Unique reads	OTU number
AeyL1	171237	149997	124779	52644382	422	97.89	53.89	72.87	119712	1497	3570	1450
AeyL2	176099	154921	141388	60263299	426	97.61	52.33	80.29	137737	1513	2138	1129
AeyL3	164700	145106	133024	56572283	425	97.98	53.26	80.77	127597	3035	2392	1163
AlbL1	170313	148454	136807	57945875	424	97.92	53.2	80.33	134402	707	1698	931
AlbL2	186753	171627	165111	70303311	426	97.96	53.81	88.41	162082	936	2093	873
AlbL3	169922	156470	148324	62967405	425	97.95	50.76	87.29	145314	756	2254	1181
AeyF1	171628	123101	91102	37904588	416	98.02	53.65	53.08	85217	493	5392	1730
AeyF2	183132	126130	93504	39009321	417	98.02	53.65	51.06	86613	793	6098	1386
AeyF3	182344	163289	152471	64952967	426	97.98	54.34	83.62	149357	276	2838	1282
AeyM1	358378	197933	151748	63027995	415	97.63	53.23	42.34	139627	2500	9621	1530
AeyM2	118356	107013	73203	30887410	422	97.99	53.3	61.85	70446	872	1885	1320
AeyM3	176720	101099	70150	29253319	417	97.64	53.18	39.7	61844	1009	7297	1179
AlbF1	173944	140113	132340	53641018	405	98.06	48.64	76.08	128089	1149	3102	1185
AlbF2	187129	170186	162560	69356516	427	98	53.83	86.87	160424	1017	1119	743
AlbF3	181017	142014	133095	53995708	406	97.9	49	73.53	127800	3377	1918	1088
AlbM1	176513	158893	152979	62505656	409	97.86	48.15	86.67	151284	543	1152	818
AlbM2	169742	141472	127436	51642268	405	98.1	49.17	75.08	120640	4020	2776	1262
AlbM3	187387	126030	120734	49209561	408	97.95	48.27	64.43	114898	3326	2510	1489
AeyW1	178106	163775	138393	57880393	418	98.13	55.28	77.7	134101	59	4233	1627
AeyW2	189695	172428	150910	62137440	412	98.21	54.92	79.55	145479	57	5374	1131
AeyW3	181803	168347	141805	59373510	419	98.12	55.23	78	136646	9	5150	1592
AlbW1	169471	137350	89253	37265323	418	98.19	54.8	52.67	82307	0	6946	1360
AlbW2	170427	156776	127869	53780705	421	98.11	54.47	75.03	124163	18	3688	1350
AlbW3	177165	158699	120078	49469922	412	98.19	55.12	67.78	114474	255	5349	1797
