# Supplementary material for: Microbiome Composition and Microbial Community Structure in Mosquito Vectors Aedes aegypti and Aedes albopictus in Northeastern Thailand, a Dengue-Endemic Area
Source: Insects. 2023 Feb 13;14(2):184. doi: 10.3390/insects14020184 (PMC9961164; doi:10.3390/insects14020184)
Supplement: Supplementary file 1 [file insects-14-00184-s001.zip › Table S2_28-12-22.xlsx]

## Sheet: All OTU
Table S2. Complete list of bacterial OTUs found across all sample groups.
Sequences sharing ≥ 97% similarity were assigned to the same OTU (k;Kingdom, p;Phylum, c;Class, o;Order, f;Family, g;genus, species;s)
#OTU_number	Mean sequence count of each OTU per sample group								Taxonomy	Sequence count of each OTU per individual sample																								Taxonomy
	AeyL	AlbL	AeyF	AeyM	AlbF	AlbM	AeyW	AlbW		AeyL1	AeyL2	AeyL3	AlbL1	AlbL2	AlbL3	AeyF1	AeyF2	AeyF3	AeyM1	AeyM2	AeyM3	AlbF1	AlbF2	AlbF3	AlbM1	AlbM2	AlbM3	AeyW1	AeyW2	AeyW3	AlbW1	AlbW2	AlbW3
OTU_1	762	1697	3447	1429	39209	70452	716	407	k__Bacteria;p__Proteobacteria;c__Alphaproteobacteria;o__Rickettsiales;f__Anaplasmataceae;g__Wolbachia	111	61	2114	1082	3011	996	4482	3257	2602	1535	1717	1033	58406	3571	55649	107211	33571	70574	767	490	889	0	402	818	k__Bacteria;p__Proteobacteria;c__Alphaproteobacteria;o__Rickettsiales;f__Anaplasmataceae;g__Wolbachia
OTU_2	29	145	29276	782	46348	881	319	824	k__Bacteria;p__Proteobacteria;c__Gammaproteobacteria;o__Aeromonadales;f__Aeromonadaceae;g__Aeromonas;s__Aeromonas_hydrophila	45	25	17	6	377	52	1389	1180	85258	874	838	632	834	136851	1357	1285	1331	27	53	35	869	6	1941	525	k__Bacteria;p__Proteobacteria;c__Gammaproteobacteria;o__Aeromonadales;f__Aeromonadaceae;g__Aeromonas;s__Aeromonas_hydrophila
OTU_3	19007	59532	64	162	3457	2561	2	59	k__Bacteria;p__Proteobacteria;c__Gammaproteobacteria;o__Enterobacterales;f__Yersiniaceae;g__Serratia	6624	5405	44990	43133	102946	32516	94	59	39	45	240	199	4432	37	5901	5910	1769	2	2	2	2	0	2	175	k__Bacteria;p__Proteobacteria;c__Gammaproteobacteria;o__Enterobacterales;f__Yersiniaceae;g__Serratia
OTU_4	1299	9	12105	16632	1450	948	149	369	k__Bacteria;p__Proteobacteria;c__Gammaproteobacteria;o__Enterobacterales;f__Enterobacteriaceae;g__Escherichia-Shigella;s__Escherichia_coli	2084	1386	426	4	11	12	13706	21534	1074	8703	21419	19772	1659	765	1925	1586	1218	40	201	244	1	3	172	932	k__Bacteria;p__Proteobacteria;c__Gammaproteobacteria;o__Enterobacterales;f__Enterobacteriaceae;g__Escherichia-Shigella;s__Escherichia_coli
OTU_5	67	346	1	442	6	45	189	24909	k__Bacteria;p__Verrucomicrobiota;c__Verrucomicrobiae;o__Opitutales;f__Opitutaceae	153	24	22	3	1020	13	1	0	0	1203	119	4	13	3	0	44	0	91	217	170	180	0	63888	10839	k__Bacteria;p__Verrucomicrobiota;c__Verrucomicrobiae;o__Opitutales;f__Opitutaceae
OTU_6	37503	844	17	342	495	3	41	2	k__Bacteria;p__Firmicutes;c__Bacilli;o__Bacillales;f__Planococcaceae;g__Lysinibacillus;s__Lysinibacillus_sphaericus	1506	76054	34948	1093	376	1061	37	12	2	1	0	1025	1350	1	132	0	1	6	89	20	12	0	3	2	k__Bacteria;p__Firmicutes;c__Bacilli;o__Bacillales;f__Planococcaceae;g__Lysinibacillus;s__Lysinibacillus_sphaericus
OTU_7	1411	2351	24	31	93	6274	3	14	k__Bacteria;p__Spirochaetota;c__Spirochaetia;o__Spirochaetales;f__Spirochaetaceae;g__;s__Spironema_culicis	3284	930	17	14	302	6737	47	18	6	3	57	31	8	250	19	15167	273	3381	6	0	1	0	3	37	k__Bacteria;p__Spirochaetota;c__Spirochaetia;o__Spirochaetales;f__Spirochaetaceae;g__;s__Spironema_culicis
OTU_8	105	95	192	141	308	294	0	2	k__Bacteria;p__Firmicutes;c__Bacilli	147	117	51	140	25	119	252	234	89	123	144	156	116	619	189	102	238	541	0	0	0	0	3	2	k__Bacteria;p__Firmicutes;c__Bacilli
OTU_9	7946	10128	6	12	772	428	31	38	k__Bacteria;p__Proteobacteria;c__Gammaproteobacteria;o__Burkholderiales;f__Comamonadaceae	2060	1027	20750	12738	16691	954	2	2	13	24	9	3	1031	329	954	1274	6	2	18	11	62	0	69	45	k__Bacteria;p__Proteobacteria;c__Gammaproteobacteria;o__Burkholderiales;f__Comamonadaceae
OTU_10	10964	4071	9	257	6	444	37	543	k__Bacteria;p__Proteobacteria;c__Gammaproteobacteria;o__Burkholderiales;f__Rhodocyclaceae;g__C39;s__Rhodocyclaceae_bacterium	27445	4699	748	668	9269	2275	6	20	0	11	627	131	11	1	4	1099	211	20	39	50	22	1	71	1557	k__Bacteria;p__Proteobacteria;c__Gammaproteobacteria;o__Burkholderiales;f__Rhodocyclaceae;g__C39;s__Rhodocyclaceae_bacterium
OTU_11	93	49	280	6	59	17	3796	176	k__Bacteria;p__Chloroflexi;c__Anaerolineae;o__RBG-13-54-9;f__RBG-13-54-9;g__RBG-13-54-9	146	86	47	26	41	79	158	677	5	4	13	1	4	170	3	0	1	48	1683	9591	114	109	80	338	k__Bacteria;p__Chloroflexi;c__Anaerolineae;o__RBG-13-54-9;f__RBG-13-54-9;g__RBG-13-54-9
OTU_12	364	1725	697	249	800	722	39	52	k__Bacteria;p__Proteobacteria;c__Alphaproteobacteria;o__Rhizobiales;f__Rhizobiaceae;g__Shinella	575	241	275	4625	229	320	882	660	547	291	294	161	313	208	1877	345	416	1404	24	9	84	103	26	27	k__Bacteria;p__Proteobacteria;c__Alphaproteobacteria;o__Rhizobiales;f__Rhizobiaceae;g__Shinella
OTU_13	2	0	632	3	1	111	9312	231	k__Bacteria;p__Myxococcota;c__Polyangia;o__Polyangiales;f__Sandaracinaceae;g__;s__	4	0	0	0	0	0	4	1	1889	2	3	2	1	0	0	0	0	333	547	348	27041	33	203	456	k__Bacteria;p__Myxococcota;c__Polyangia;o__Polyangiales;f__Sandaracinaceae;g__;s__
OTU_14	7	24	356	5	9	28	8753	169	k__Bacteria;p__Nitrospirota;c__Nitrospiria;o__Nitrospirales;f__Nitrospiraceae;g__Nitrospira;s__Nitrospira_defluvii	14	2	3	63	0	8	659	25	384	12	1	1	6	4	17	0	2	82	12609	361	13287	149	115	242	k__Bacteria;p__Nitrospirota;c__Nitrospiria;o__Nitrospirales;f__Nitrospiraceae;g__Nitrospira;s__Nitrospira_defluvii
OTU_15	439	2633	19	128	87	228	284	5220	k__Bacteria;p__Proteobacteria;c__Alphaproteobacteria;o__Rhodobacterales;f__Rhodobacteraceae;g__Gemmobacter	898	192	227	616	230	7052	23	29	5	56	300	27	70	65	126	26	512	145	314	266	271	3076	1405	11179	k__Bacteria;p__Proteobacteria;c__Alphaproteobacteria;o__Rhodobacterales;f__Rhodobacteraceae;g__Gemmobacter
OTU_16	176	179	12	117	14	61	183	8160	k__Bacteria;p__Chloroflexi;c__Anaerolineae;o__Caldilineales;f__Caldilineaceae;g__	449	37	40	1	3	532	14	13	9	44	287	19	21	16	4	3	58	120	217	162	169	39	2075	22364	k__Bacteria;p__Chloroflexi;c__Anaerolineae;o__Caldilineales;f__Caldilineaceae;g__
OTU_17	650	7839	2	1	633	2	3	1	k__Bacteria;p__Proteobacteria;c__Gammaproteobacteria;o__Burkholderiales;f__Comamonadaceae	1059	512	377	22631	440	444	0	5	1	1	0	0	0	1	1897	0	3	1	0	7	2	0	0	1	k__Bacteria;p__Proteobacteria;c__Gammaproteobacteria;o__Burkholderiales;f__Comamonadaceae
OTU_18	400	1	4334	6790	316	378	66	218	k__Bacteria;p__Firmicutes;c__Bacilli;o__Erysipelotrichales;f__Erysipelotrichaceae;g__Clostridium_innocuum_group;s__	744	456	0	0	0	1	5279	7392	330	2732	9200	8438	404	205	337	255	878	0	88	110	0	0	81	571	k__Bacteria;p__Firmicutes;c__Bacilli;o__Erysipelotrichales;f__Erysipelotrichaceae;g__Clostridium_innocuum_group;s__
OTU_19	301	212	455	62	212	116	1535	600	k__Bacteria;p__Proteobacteria;c__Alphaproteobacteria;o__Sphingomonadales;f__Sphingomonadaceae;g__Sandaracinobacter;s__	473	224	204	108	333	193	138	830	397	110	68	8	11	623	2	104	2	242	541	2197	1866	5	907	887	k__Bacteria;p__Proteobacteria;c__Alphaproteobacteria;o__Sphingomonadales;f__Sphingomonadaceae;g__Sandaracinobacter;s__
OTU_20	4452	1397	161	209	256	79	486	2149	k__Bacteria;p__Actinobacteriota;c__Actinobacteria;o__Micrococcales;f__Microbacteriaceae	12200	775	381	2873	274	1044	219	208	56	43	539	43	36	15	716	2	140	94	678	426	353	1886	431	4130	k__Bacteria;p__Actinobacteriota;c__Actinobacteria;o__Micrococcales;f__Microbacteriaceae
OTU_21	4	0	284	1	0	15	7406	104	k__Bacteria;p__Patescibacteria;c__Saccharimonadia;o__Saccharimonadales;f__Saccharimonadales;g__Saccharimonadales;s__	2	10	0	0	0	0	1	766	84	0	2	0	0	0	0	0	0	44	142	18011	4064	42	81	187	k__Bacteria;p__Patescibacteria;c__Saccharimonadia;o__Saccharimonadales;f__Saccharimonadales;g__Saccharimonadales;s__
OTU_22	355	1	1798	2087	408	436	83	244	k__Bacteria;p__Firmicutes;c__Clostridia;o__Peptostreptococcales-Tissierellales;f__Peptostreptococcaceae;g__Clostridioides;s__Clostridioides_difficile	600	463	0	0	0	1	2314	2509	570	1225	2572	2463	376	244	604	426	876	5	90	158	0	1	132	599	k__Bacteria;p__Firmicutes;c__Clostridia;o__Peptostreptococcales-Tissierellales;f__Peptostreptococcaceae;g__Clostridioides;s__Clostridioides_difficile
OTU_23	195	0	2147	3224	144	180	39	110	k__Bacteria;p__Firmicutes;c__Bacilli;o__Erysipelotrichales;f__Erysipelatoclostridiaceae;g__Coprobacillus;s__Coprobacillus_cateniformis	372	212	0	0	0	0	2778	3473	189	1379	4575	3717	159	107	165	107	433	0	45	70	0	0	41	288	k__Bacteria;p__Firmicutes;c__Bacilli;o__Erysipelotrichales;f__Erysipelatoclostridiaceae;g__Coprobacillus;s__Coprobacillus_cateniformis
OTU_24	198	30	445	4	3	43	4550	151	k__Bacteria;p__Proteobacteria;c__Gammaproteobacteria;o__Burkholderiales;f__Comamonadaceae	67	497	29	36	29	23	194	1131	8	0	4	8	2	5	2	2	2	125	2479	10887	282	74	98	279	k__Bacteria;p__Proteobacteria;c__Gammaproteobacteria;o__Burkholderiales;f__Comamonadaceae
OTU_25	4342	246	78	101	11	11	148	118	k__Bacteria;p__Proteobacteria;c__Gammaproteobacteria;o__Burkholderiales;f__Comamonadaceae;g__Aquabacterium;s__	7451	5331	244	265	213	258	213	14	7	3	169	131	3	6	23	5	18	10	388	9	45	14	3	336	k__Bacteria;p__Proteobacteria;c__Gammaproteobacteria;o__Burkholderiales;f__Comamonadaceae;g__Aquabacterium;s__
OTU_26	321	1	2200	2778	400	462	77	204	k__Bacteria;p__Firmicutes;c__Clostridia;o__Lachnospirales;f__Lachnospiraceae;g__Blautia	501	454	8	0	0	1	2946	3139	514	1601	3375	3358	464	260	474	299	1086	0	118	112	0	0	70	542	k__Bacteria;p__Firmicutes;c__Clostridia;o__Lachnospirales;f__Lachnospiraceae;g__Blautia
OTU_27	75	1030	14	0	82	2	146	1956	k__Bacteria;p__Acidobacteriota;c__Blastocatellia;o__Blastocatellales;f__Blastocatellaceae	109	74	41	2984	32	73	40	0	0	0	0	0	0	3	243	0	2	2	418	3	15	5847	4	17	k__Bacteria;p__Acidobacteriota;c__Blastocatellia;o__Blastocatellales;f__Blastocatellaceae
OTU_28	14	3	17	31	2	4	197	5321	k__Bacteria;p__Proteobacteria;c__Gammaproteobacteria;o__Burkholderiales;f__Comamonadaceae;g__Comamonas;s__Comamonas_testosteroni	33	8	0	4	0	3	44	4	2	88	3	2	3	0	3	4	2	6	538	11	40	15933	11	19	k__Bacteria;p__Proteobacteria;c__Gammaproteobacteria;o__Burkholderiales;f__Comamonadaceae;g__Comamonas;s__Comamonas_testosteroni
OTU_29	83	135	0	0	25	1	1	1	k__Bacteria;p__Bacteroidota;c__Bacteroidia;o__Chitinophagales;f__Saprospiraceae;g__	65	49	135	309	17	77	0	0	0	0	0	0	5	48	21	0	1	0	0	1	0	0	0	2	k__Bacteria;p__Bacteroidota;c__Bacteroidia;o__Chitinophagales;f__Saprospiraceae;g__
OTU_30	259	3	1156	2079	294	203	38	114	k__Bacteria;p__Proteobacteria;c__Gammaproteobacteria;o__Burkholderiales;f__Sutterellaceae;g__Parasutterella;s__	464	308	4	5	0	2	1471	1674	321	2095	2059	2082	253	158	469	277	325	6	62	50	1	0	38	304	k__Bacteria;p__Proteobacteria;c__Gammaproteobacteria;o__Burkholderiales;f__Sutterellaceae;g__Parasutterella;s__
OTU_31	210	3489	1	0	182	1	0	0	k__Bacteria;p__Bacteroidota;c__Bacteroidia;o__Bacteroidales;f__Dysgonomonadaceae;g__Dysgonomonas	292	177	161	9959	84	422	1	0	0	0	0	0	0	2	544	0	1	0	0	0	0	0	0	0	k__Bacteria;p__Bacteroidota;c__Bacteroidia;o__Bacteroidales;f__Dysgonomonadaceae;g__Dysgonomonas
OTU_32	303	1987	24	21	134	111	57	370	k__Bacteria;p__Proteobacteria;c__Gammaproteobacteria;o__Burkholderiales;f__Comamonadaceae;g__Hydrogenophaga	460	200	247	2825	235	2899	28	24	19	11	41	9	12	125	265	19	242	70	33	12	126	74	135	899	k__Bacteria;p__Proteobacteria;c__Gammaproteobacteria;o__Burkholderiales;f__Comamonadaceae;g__Hydrogenophaga
OTU_33	2	1	309	1	0	42	2683	109	k__Bacteria;p__Myxococcota;c__Polyangia;o__Polyangiales;f__Sandaracinaceae;g__	6	0	0	2	0	0	665	228	32	0	3	0	0	0	0	0	0	125	6856	829	362	22	95	209	k__Bacteria;p__Myxococcota;c__Polyangia;o__Polyangiales;f__Sandaracinaceae;g__
OTU_34	0	0	138	0	0	5	3650	42	k__Bacteria;p__Planctomycetota;c__Phycisphaerae;o__Phycisphaerales;f__Phycisphaeraceae;g__SM1A02;s__	0	0	0	0	0	0	3	405	5	0	0	0	0	0	0	0	0	15	59	10710	180	66	13	47	k__Bacteria;p__Planctomycetota;c__Phycisphaerae;o__Phycisphaerales;f__Phycisphaeraceae;g__SM1A02;s__
OTU_35	2936	6620	21	14	0	479	4	21	k__Bacteria;p__Spirochaetota;c__Spirochaetia;o__Spirochaetales;f__Spirochaetaceae;g__;s__Spironema_culicis	6815	1962	30	9	56	19795	61	0	0	0	31	10	0	0	0	3	308	1125	5	5	0	0	0	62	k__Bacteria;p__Spirochaetota;c__Spirochaetia;o__Spirochaetales;f__Spirochaetaceae;g__;s__Spironema_culicis
OTU_36	1109	319	3	24	129	1	7	24	k__Bacteria;p__Proteobacteria;c__Gammaproteobacteria;o__Burkholderiales;f__Rhodocyclaceae	2171	786	370	654	150	152	0	8	0	4	41	27	32	244	111	0	1	0	0	17	2	0	2	69	k__Bacteria;p__Proteobacteria;c__Gammaproteobacteria;o__Burkholderiales;f__Rhodocyclaceae
OTU_37	12	6	7	281	5	10	10	2977	k__Bacteria;p__Proteobacteria;c__Gammaproteobacteria;o__Pseudomonadales;f__Moraxellaceae;g__Acinetobacter;s__Acinetobacter_junii	9	13	14	4	5	9	11	6	4	829	5	7	6	0	9	7	9	13	21	4	4	8913	3	13	k__Bacteria;p__Proteobacteria;c__Gammaproteobacteria;o__Pseudomonadales;f__Moraxellaceae;g__Acinetobacter;s__Acinetobacter_junii
OTU_38	47	0	962	1364	23	36	14	47	k__Bacteria;p__Verrucomicrobiota;c__Verrucomicrobiae;o__Verrucomicrobiales;f__Akkermansiaceae;g__Akkermansia;s__Akkermansia_muciniphila	87	51	1	0	0	0	893	1942	50	614	1528	1949	28	13	28	11	84	12	14	27	0	3	26	111	k__Bacteria;p__Verrucomicrobiota;c__Verrucomicrobiae;o__Verrucomicrobiales;f__Akkermansiaceae;g__Akkermansia;s__Akkermansia_muciniphila
OTU_39	4681	279	1	119	0	0	1	46	k__Bacteria;p__Proteobacteria;c__Gammaproteobacteria;o__Enterobacterales;f__Thorselliaceae;g__Coetzeea;s__Coetzeea_brasiliensis	3127	10670	245	239	222	374	1	0	1	0	118	239	0	0	0	0	0	0	3	0	0	0	0	137	k__Bacteria;p__Proteobacteria;c__Gammaproteobacteria;o__Enterobacterales;f__Thorselliaceae;g__Coetzeea;s__Coetzeea_brasiliensis
OTU_40	11	1	120	2883	86	53	1	71	k__Bacteria;p__Actinobacteriota;c__Actinobacteria;o__Bifidobacteriales;f__Bifidobacteriaceae;g__Bifidobacterium;s__Bifidobacterium_catenulatum	11	4	18	2	1	0	184	101	75	8563	62	24	80	80	96	66	91	2	1	1	0	1	198	12	k__Bacteria;p__Actinobacteriota;c__Actinobacteria;o__Bifidobacteriales;f__Bifidobacteriaceae;g__Bifidobacterium;s__Bifidobacterium_catenulatum
OTU_41	163	36	489	169	170	458	400	338	k__Bacteria;p__Proteobacteria;c__Alphaproteobacteria;o__Sphingomonadales;f__Sphingomonadaceae;g__Novosphingobium	242	139	108	31	39	36	764	390	311	167	238	101	165	96	249	212	239	922	661	150	389	262	113	638	k__Bacteria;p__Proteobacteria;c__Alphaproteobacteria;o__Sphingomonadales;f__Sphingomonadaceae;g__Novosphingobium
OTU_42	0	11	9	3113	1	17	3	0	k__Bacteria;p__Proteobacteria;c__Gammaproteobacteria;o__Burkholderiales;f__Alcaligenaceae;g__Castellaniella;s__Castellaniella_defragrans	0	0	0	0	0	31	25	0	0	9339	0	0	0	3	0	0	49	0	9	0	0	0	0	0	k__Bacteria;p__Proteobacteria;c__Gammaproteobacteria;o__Burkholderiales;f__Alcaligenaceae;g__Castellaniella;s__Castellaniella_defragrans
OTU_43	123	1	1045	1395	148	123	16	37	k__Bacteria;p__Proteobacteria;c__Gammaproteobacteria;o__Enterobacterales;f__Morganellaceae;g__Morganella;s__Morganella_morganii	197	171	0	0	0	1	1169	1849	116	567	1862	1756	103	106	233	200	169	0	22	25	0	0	20	89	k__Bacteria;p__Proteobacteria;c__Gammaproteobacteria;o__Enterobacterales;f__Morganellaceae;g__Morganella;s__Morganella_morganii
OTU_44	1	0	216	0	0	23	2014	58	k__Bacteria;p__Myxococcota;c__Polyangia;o__Polyangiales;f__Sandaracinaceae;g__;s__Oryza_longistaminata	1	0	0	0	0	0	647	0	1	0	0	0	0	0	0	0	0	67	5805	85	150	2	55	115	k__Bacteria;p__Myxococcota;c__Polyangia;o__Polyangiales;f__Sandaracinaceae;g__;s__Oryza_longistaminata
OTU_45	12	26	0	1	4	2	5	120	k__Bacteria;p__Verrucomicrobiota;c__Verrucomicrobiae;o__Verrucomicrobiales;f__Verrucomicrobiaceae;g__;s__	28	2	6	70	1	5	0	0	0	0	2	0	2	8	1	0	0	4	6	5	2	2	48	309	k__Bacteria;p__Verrucomicrobiota;c__Verrucomicrobiae;o__Verrucomicrobiales;f__Verrucomicrobiaceae;g__;s__
OTU_46	1	2	170	72	71	196	10	25	k__Bacteria;p__Proteobacteria;c__Alphaproteobacteria;o__Rhizobiales;f__Xanthobacteraceae;g__Ancylobacter;s__Ancylobacter_sp.	1	0	0	4	0	0	218	172	119	88	76	50	51	52	110	77	91	419	2	1	27	68	4	3	k__Bacteria;p__Proteobacteria;c__Alphaproteobacteria;o__Rhizobiales;f__Xanthobacteraceae;g__Ancylobacter;s__Ancylobacter_sp.
OTU_47	1	13	95	1	0	3	2389	62	k__Bacteria;p__Verrucomicrobiota;c__Verrucomicrobiae;o__Pedosphaerales;f__Pedosphaeraceae;g__Pedosphaeraceae;s__	0	1	0	37	0	0	161	115	9	0	3	0	0	0	0	0	0	8	4358	2532	276	3	41	140	k__Bacteria;p__Verrucomicrobiota;c__Verrucomicrobiae;o__Pedosphaerales;f__Pedosphaeraceae;g__Pedosphaeraceae;s__
OTU_48	67	1951	11	5	3	45	163	140	k__Bacteria;p__Bacteroidota;c__Bacteroidia;o__Cytophagales;f__Spirosomaceae;g__Runella	92	70	37	46	5043	762	7	24	1	11	3	0	0	8	0	99	24	11	106	371	12	4	295	119	k__Bacteria;p__Bacteroidota;c__Bacteroidia;o__Cytophagales;f__Spirosomaceae;g__Runella
OTU_49	0	0	104	0	0	8	1982	21	k__Bacteria;p__Verrucomicrobiota;c__Verrucomicrobiae;o__Verrucomicrobiales;f__Verrucomicrobiaceae;g__;s__	0	0	0	0	0	0	2	237	72	0	0	0	0	0	0	0	0	24	30	3764	2150	0	10	51	k__Bacteria;p__Verrucomicrobiota;c__Verrucomicrobiae;o__Verrucomicrobiales;f__Verrucomicrobiaceae;g__;s__
OTU_50	10	4	291	2	2	25	2499	132	k__Bacteria;p__Acidobacteriota;c__Vicinamibacteria;o__Vicinamibacterales;f__Vicinamibacteraceae;g__Vicinamibacteraceae;s__	7	2	20	9	2	1	487	274	111	0	6	0	3	0	1	0	0	75	4687	1687	1123	118	84	193	k__Bacteria;p__Acidobacteriota;c__Vicinamibacteria;o__Vicinamibacterales;f__Vicinamibacteraceae;g__Vicinamibacteraceae;s__
OTU_51	48	2436	0	0	2	25	0	2	k__Bacteria;p__Bacteroidota;c__Bacteroidia;o__Cytophagales;f__Spirosomaceae;g__Flectobacillus;s__Flectobacillus_sp.	72	48	24	76	11	7220	0	0	0	0	0	0	0	0	4	0	74	0	0	0	0	0	0	6	k__Bacteria;p__Bacteroidota;c__Bacteroidia;o__Cytophagales;f__Spirosomaceae;g__Flectobacillus;s__Flectobacillus_sp.
OTU_52	8	3	173	1998	103	100	3	99	k__Bacteria;p__Firmicutes;c__Clostridia;o__Lachnospirales;f__Lachnospiraceae;g__Blautia	7	4	12	2	0	7	258	143	116	5763	134	97	123	81	105	70	213	17	1	8	0	1	280	14	k__Bacteria;p__Firmicutes;c__Clostridia;o__Lachnospirales;f__Lachnospiraceae;g__Blautia
OTU_53	9	22	968	5	1	36	420	0	k__Bacteria;p__Actinobacteriota;c__Actinobacteria;o__Micrococcales;f__Bogoriellaceae;g__Georgenia;s__	0	22	3	0	0	64	2902	2	0	1	1	12	2	0	1	0	107	0	1259	0	1	0	0	0	k__Bacteria;p__Actinobacteriota;c__Actinobacteria;o__Micrococcales;f__Bogoriellaceae;g__Georgenia;s__
OTU_54	7	4	192	2	3	7	1618	48	k__Bacteria;p__Nitrospirota;c__Nitrospiria;o__Nitrospirales;f__Nitrospiraceae;g__Nitrospira	8	5	6	10	0	2	167	402	6	0	1	3	5	0	4	0	0	19	2217	2363	273	35	37	70	k__Bacteria;p__Nitrospirota;c__Nitrospiria;o__Nitrospirales;f__Nitrospiraceae;g__Nitrospira
OTU_55	75	206	406	138	228	357	464	358	k__Bacteria;p__Proteobacteria;c__Alphaproteobacteria;o__Rhizobiales;f__Beijerinckiaceae;g__Bosea;s__Bosea_sp.	119	38	66	471	59	86	506	401	311	168	159	87	113	184	387	165	206	699	466	311	614	696	181	197	k__Bacteria;p__Proteobacteria;c__Alphaproteobacteria;o__Rhizobiales;f__Beijerinckiaceae;g__Bosea;s__Bosea_sp.
OTU_56	1508	118	8	68	3	3	24	162	k__Bacteria;p__Actinobacteriota;c__Actinobacteria;o__PeM15;f__PeM15;g__PeM15;s__	3755	645	124	91	94	169	9	12	2	3	172	28	3	2	3	0	3	6	30	24	16	47	17	420	k__Bacteria;p__Actinobacteriota;c__Actinobacteria;o__PeM15;f__PeM15;g__PeM15;s__
OTU_57	71	212	11	63	25	45	165	1104	k__Bacteria;p__Proteobacteria;c__Alphaproteobacteria;o__Rhodobacterales;f__Rhodobacteraceae	139	42	30	114	443	79	4	3	25	154	28	5	9	42	22	82	3	49	73	50	371	13	2366	933	k__Bacteria;p__Proteobacteria;c__Alphaproteobacteria;o__Rhodobacterales;f__Rhodobacteraceae
OTU_58	1186	121	1	84	1	1	1	107	k__Bacteria;p__Proteobacteria;c__Alphaproteobacteria;o__Caulobacterales;f__Hyphomonadaceae;g__UKL13-1;s__	2749	687	120	94	123	146	2	0	0	0	180	70	0	0	1	2	0	0	0	1	0	0	0	321	k__Bacteria;p__Proteobacteria;c__Alphaproteobacteria;o__Caulobacterales;f__Hyphomonadaceae;g__UKL13-1;s__
OTU_59	30	83	248	10	23	54	1311	441	k__Bacteria;p__Proteobacteria;c__Alphaproteobacteria;o__Acetobacterales;f__Acetobacteraceae;g__Roseomonas;s__	58	13	17	136	17	95	153	522	68	9	19	2	4	18	47	5	35	122	553	2971	408	960	92	269	k__Bacteria;p__Proteobacteria;c__Alphaproteobacteria;o__Acetobacterales;f__Acetobacteraceae;g__Roseomonas;s__
OTU_60	156	3	1386	1870	178	130	22	53	k__Bacteria;p__Proteobacteria;c__Gammaproteobacteria;o__Enterobacterales;f__Enterobacteriaceae;g__Klebsiella;s__Klebsiella_pneumoniae	304	132	31	0	1	7	1502	2513	143	1181	2379	2050	165	108	260	226	155	7	20	44	2	8	47	103	k__Bacteria;p__Proteobacteria;c__Gammaproteobacteria;o__Enterobacterales;f__Enterobacteriaceae;g__Klebsiella;s__Klebsiella_pneumoniae
OTU_61	2	77	1	1	236	957	0	0	Unknown	2	3	0	0	206	25	1	0	0	1	1	0	5	701	0	22	2847	0	0	0	0	0	0	0	Unknown
OTU_62	0	0	145	1	0	37	1092	84	k__Bacteria;p__Proteobacteria;c__Alphaproteobacteria;o__Caulobacterales;f__Hyphomonadaceae;g__SWB02	0	0	0	0	0	0	0	0	433	1	1	0	0	0	0	0	0	111	129	90	3057	12	87	152	k__Bacteria;p__Proteobacteria;c__Alphaproteobacteria;o__Caulobacterales;f__Hyphomonadaceae;g__SWB02
OTU_63	1	0	0	2350	1	0	0	0	k__Bacteria;p__Firmicutes;c__Negativicutes;o__Veillonellales-Selenomonadales;f__Veillonellaceae;g__Megasphaera;s__Megasphaera_elsdenii	0	0	2	0	0	0	0	0	0	7048	0	0	3	0	0	0	0	0	0	0	0	0	0	0	k__Bacteria;p__Firmicutes;c__Negativicutes;o__Veillonellales-Selenomonadales;f__Veillonellaceae;g__Megasphaera;s__Megasphaera_elsdenii
OTU_64	511	247	204	117	9	109	830	921	k__Bacteria;p__Proteobacteria;c__Alphaproteobacteria;o__Rhizobiales;f__Rhizobiales_Incertae_Sedis;g__;s__	708	742	83	90	507	144	353	77	180	217	71	62	4	14	9	156	5	164	1119	272	1097	478	1514	771	k__Bacteria;p__Proteobacteria;c__Alphaproteobacteria;o__Rhizobiales;f__Rhizobiales_Incertae_Sedis;g__;s__
OTU_65	14	2	226	63	1393	94	353	104	k__Bacteria;p__Proteobacteria;c__Gammaproteobacteria;o__Xanthomonadales;f__Xanthomonadaceae;g__Stenotrophomonas	4	4	33	0	2	4	296	124	256	76	79	34	81	3974	122	88	162	31	202	53	802	32	165	115	k__Bacteria;p__Proteobacteria;c__Gammaproteobacteria;o__Xanthomonadales;f__Xanthomonadaceae;g__Stenotrophomonas
OTU_66	3	5	184	3	1	27	1092	115	k__Bacteria;p__Proteobacteria;c__Alphaproteobacteria;o__Acetobacterales;f__Acetobacteraceae;g__Rhodovastum;s__	6	1	2	1	8	5	68	460	22	6	1	0	0	2	0	3	1	77	280	2816	180	148	86	109	k__Bacteria;p__Proteobacteria;c__Alphaproteobacteria;o__Acetobacterales;f__Acetobacteraceae;g__Rhodovastum;s__
OTU_67	34	57	100	52	22	38	510	585	k__Bacteria;p__Proteobacteria;c__Alphaproteobacteria;o__Acetobacterales;f__Acetobacteraceae;g__Roseomonas	70	13	17	15	117	38	40	229	30	120	33	3	5	51	8	34	6	72	189	1151	189	420	898	435	k__Bacteria;p__Proteobacteria;c__Alphaproteobacteria;o__Acetobacterales;f__Acetobacteraceae;g__Roseomonas
OTU_68	101	38	60	1	4	11	1339	32	k__Bacteria;p__Bacteroidota;c__Bacteroidia;o__Chitinophagales;f__Chitinophagaceae;g__Ferruginibacter;s__	131	158	14	88	7	19	168	10	1	0	3	0	0	0	11	0	0	31	3733	208	76	12	19	65	k__Bacteria;p__Bacteroidota;c__Bacteroidia;o__Chitinophagales;f__Chitinophagaceae;g__Ferruginibacter;s__
OTU_69	30	12	116	12	4	12	1046	272	k__Bacteria;p__Acidobacteriota;c__Blastocatellia;o__Blastocatellales;f__Blastocatellaceae;g__Blastocatella;s__	55	3	31	18	1	17	341	6	0	6	28	0	7	1	2	0	2	33	2954	117	66	6	98	710	k__Bacteria;p__Acidobacteriota;c__Blastocatellia;o__Blastocatellales;f__Blastocatellaceae;g__Blastocatella;s__
OTU_70	2	2	56	1	0	1	1103	47	k__Bacteria;p__Planctomycetota;c__Phycisphaerae;o__Phycisphaerales;f__Phycisphaeraceae;g__SM1A02;s__	6	0	0	3	0	1	0	168	0	0	1	0	0	0	0	0	0	2	9	3192	106	63	16	61	k__Bacteria;p__Planctomycetota;c__Phycisphaerae;o__Phycisphaerales;f__Phycisphaeraceae;g__SM1A02;s__
OTU_71	14	4	167	1	6	39	873	73	k__Bacteria;p__Proteobacteria;c__Alphaproteobacteria;o__Sphingomonadales;f__Sphingomonadaceae;g__SD04E11;s__Sphingomonas_piscinae	11	5	25	0	3	7	0	0	501	0	0	2	15	0	1	0	0	117	131	81	2405	1	83	133	k__Bacteria;p__Proteobacteria;c__Alphaproteobacteria;o__Sphingomonadales;f__Sphingomonadaceae;g__SD04E11;s__Sphingomonas_piscinae
OTU_72	1	1	185	0	1	17	1017	60	k__Bacteria;p__Proteobacteria;c__Alphaproteobacteria;o__Acetobacterales;f__Acetobacteraceae	1	0	0	1	0	0	3	519	33	0	0	0	0	1	0	0	1	49	86	2760	203	55	56	69	k__Bacteria;p__Proteobacteria;c__Alphaproteobacteria;o__Acetobacterales;f__Acetobacteraceae
OTU_73	3	0	220	2	1	31	796	111	k__Bacteria;p__Proteobacteria;c__Alphaproteobacteria;o__Reyranellales;f__Reyranellaceae;g__Reyranella	2	6	1	0	0	0	77	562	21	0	2	3	0	2	0	0	1	91	385	1798	204	133	61	138	k__Bacteria;p__Proteobacteria;c__Alphaproteobacteria;o__Reyranellales;f__Reyranellaceae;g__Reyranella
OTU_74	0	1	49	1	1	5	1313	19	k__Bacteria;p__Nitrospirota;c__Nitrospiria;o__Nitrospirales;f__Nitrospiraceae;g__Nitrospira;s__	0	0	0	0	1	2	18	4	125	1	0	0	1	0	0	0	0	13	170	35	3734	0	17	40	k__Bacteria;p__Nitrospirota;c__Nitrospiria;o__Nitrospirales;f__Nitrospiraceae;g__Nitrospira;s__
OTU_75	70	69	118	7	20	26	2025	250	k__Bacteria;p__Proteobacteria;c__Gammaproteobacteria;o__Burkholderiales;f__Comamonadaceae	85	38	87	66	85	54	46	12	294	3	13	3	44	2	14	15	6	55	375	161	5538	248	73	429	k__Bacteria;p__Proteobacteria;c__Gammaproteobacteria;o__Burkholderiales;f__Comamonadaceae
OTU_76	135	1	744	1009	132	140	19	81	k__Bacteria;p__Firmicutes;c__Bacilli;o__Lactobacillales;f__Enterococcaceae;g__Enterococcus	239	161	3	0	1	2	968	1093	169	556	1289	1182	169	90	135	100	316	3	30	26	0	1	24	218	k__Bacteria;p__Firmicutes;c__Bacilli;o__Lactobacillales;f__Enterococcaceae;g__Enterococcus
OTU_77	8	19	150	5	7	18	1051	75	k__Bacteria;p__Gemmatimonadota;c__Gemmatimonadetes;o__Gemmatimonadales;f__Gemmatimonadaceae;g__Gemmatimonas;s__	9	9	5	43	6	6	306	124	18	9	1	5	4	1	15	1	3	48	2239	692	220	56	49	119	k__Bacteria;p__Gemmatimonadota;c__Gemmatimonadetes;o__Gemmatimonadales;f__Gemmatimonadaceae;g__Gemmatimonas;s__
OTU_78	25	3	77	1791	46	41	1	37	k__Bacteria;p__Firmicutes;c__Bacilli;o__Lactobacillales;f__Streptococcaceae;g__Streptococcus;s__Streptococcus_salivarius	16	10	48	3	3	2	112	82	37	5257	59	57	84	21	33	29	80	12	1	0	1	2	104	3	k__Bacteria;p__Firmicutes;c__Bacilli;o__Lactobacillales;f__Streptococcaceae;g__Streptococcus;s__Streptococcus_salivarius
OTU_79	10	1	2	84	2	24	79	821	k__Bacteria;p__Proteobacteria;c__Alphaproteobacteria;o__Rhizobiales;f__Pleomorphomonadaceae;g__Pleomorphomonas;s__	23	3	3	1	0	0	1	3	0	230	20	1	3	3	0	0	0	72	92	60	83	4	1984	473	k__Bacteria;p__Proteobacteria;c__Alphaproteobacteria;o__Rhizobiales;f__Pleomorphomonadaceae;g__Pleomorphomonas;s__
OTU_80	115	1392	4	1	78	2	62	10	k__Bacteria;p__Bacteroidota;c__Bacteroidia;o__Flavobacteriales;f__Weeksellaceae;g__Chryseobacterium	191	81	72	4078	29	68	2	0	8	1	2	0	1	0	232	0	0	5	6	3	175	5	9	15	k__Bacteria;p__Bacteroidota;c__Bacteroidia;o__Flavobacteriales;f__Weeksellaceae;g__Chryseobacterium
OTU_81	58	246	108	2	93	13	509	277	k__Bacteria;p__Proteobacteria;c__Alphaproteobacteria;o__Acetobacterales;f__Acetobacteraceae;g__;s__	83	54	36	632	43	61	97	221	6	1	2	3	2	2	274	3	1	34	274	1198	54	742	33	55	k__Bacteria;p__Proteobacteria;c__Alphaproteobacteria;o__Acetobacterales;f__Acetobacteraceae;g__;s__
OTU_82	8	9	23	939	5	14	70	21	k__Bacteria;p__Proteobacteria;c__Alphaproteobacteria;o__Rhizobiales;f__Beijerinckiaceae;g__Methylobacterium-Methylorubrum	5	13	4	16	4	7	27	11	30	2803	9	5	4	3	7	3	10	29	91	15	104	22	17	23	k__Bacteria;p__Proteobacteria;c__Alphaproteobacteria;o__Rhizobiales;f__Beijerinckiaceae;g__Methylobacterium-Methylorubrum
OTU_83	1	92	1	1	430	288	2	1	Unknown	1	0	0	5	0	269	1	2	0	0	2	0	1	1	1287	0	14	850	3	3	0	0	1	2	Unknown
OTU_84	108	343	1	0	118	8	0	3	k__Bacteria;p__Proteobacteria;c__Gammaproteobacteria;o__Pseudomonadales;f__Moraxellaceae;g__Alkanindiges	151	93	78	772	129	128	1	0	0	0	0	0	0	78	274	24	0	0	0	0	0	2	4	1	k__Bacteria;p__Proteobacteria;c__Gammaproteobacteria;o__Pseudomonadales;f__Moraxellaceae;g__Alkanindiges
OTU_85	152	614	1	0	1	181	0	3	k__Bacteria;p__Proteobacteria;c__Alphaproteobacteria;o__Azospirillales;f__Azospirillaceae;g__Azospirillum;s__	244	115	97	95	1597	149	2	0	1	0	0	0	2	0	0	543	0	0	0	0	0	0	5	3	k__Bacteria;p__Proteobacteria;c__Alphaproteobacteria;o__Azospirillales;f__Azospirillaceae;g__Azospirillum;s__
OTU_86	40	124	2	72	2	59	56	529	k__Bacteria;p__Proteobacteria;c__Alphaproteobacteria;o__Azospirillales;f__Azospirillaceae;g__Azospirillum	85	19	16	11	335	25	0	0	4	192	24	0	0	4	0	121	0	56	62	38	67	0	1290	295	k__Bacteria;p__Proteobacteria;c__Alphaproteobacteria;o__Azospirillales;f__Azospirillaceae;g__Azospirillum
OTU_87	3	3	130	0	1	11	701	47	k__Bacteria;p__Armatimonadota;c__Fimbriimonadia;o__Fimbriimonadales;f__Fimbriimonadaceae;g__Fimbriimonadaceae;s__	5	3	1	8	1	0	139	227	22	0	0	0	0	0	2	0	0	33	861	1098	144	9	39	93	k__Bacteria;p__Armatimonadota;c__Fimbriimonadia;o__Fimbriimonadales;f__Fimbriimonadaceae;g__Fimbriimonadaceae;s__
OTU_88	22	9	392	11	12	72	1267	266	k__Bacteria;p__Proteobacteria;c__Alphaproteobacteria;o__Rhizobiales;f__Xanthobacteraceae;g__Bradyrhizobium;s__Bradyrhizobium_sp.	32	20	14	11	9	7	685	470	21	4	12	16	9	14	13	11	17	186	2319	1196	285	430	105	262	k__Bacteria;p__Proteobacteria;c__Alphaproteobacteria;o__Rhizobiales;f__Xanthobacteraceae;g__Bradyrhizobium;s__Bradyrhizobium_sp.
OTU_89	45	5	122	0	9	4	708	24	k__Bacteria;p__Chloroflexi;c__Anaerolineae;o__SBR1031;f__A4b;g__A4b;s__	16	17	100	3	7	5	1	361	4	0	0	0	26	0	0	0	0	11	35	2056	31	0	23	47	k__Bacteria;p__Chloroflexi;c__Anaerolineae;o__SBR1031;f__A4b;g__A4b;s__
OTU_90	17	21	171	24	3	43	770	340	k__Bacteria;p__Proteobacteria;c__Alphaproteobacteria;o__Caulobacterales;f__Hyphomonadaceae;g__Hirschia;s__	38	6	5	39	15	7	147	131	233	52	15	3	0	0	7	5	0	122	532	311	1465	264	475	279	k__Bacteria;p__Proteobacteria;c__Alphaproteobacteria;o__Caulobacterales;f__Hyphomonadaceae;g__Hirschia;s__
OTU_91	0	0	29	7	18	20	0	1	k__Bacteria;p__Bacteroidota;c__Bacteroidia;o__Flavobacteriales;f__Flavobacteriaceae;g__Flavobacterium	0	0	0	0	0	0	59	7	20	6	6	8	3	7	43	4	25	31	0	0	0	0	0	1	k__Bacteria;p__Bacteroidota;c__Bacteroidia;o__Flavobacteriales;f__Flavobacteriaceae;g__Flavobacterium
OTU_92	0	0	4	1032	2	2	0	5	k__Bacteria;p__Cyanobacteria;c__Cyanobacteriia;o__Cyanobacteriales	0	0	0	0	0	0	8	0	4	3089	3	3	0	2	4	3	2	0	0	0	0	0	13	0	k__Bacteria;p__Cyanobacteria;c__Cyanobacteriia;o__Cyanobacteriales
OTU_93	6	3	170	6	0	27	443	83	k__Bacteria;p__Proteobacteria;c__Alphaproteobacteria;o__Rhizobiales;f__Hyphomicrobiaceae;g__Hyphomicrobium	13	0	3	0	0	7	33	457	20	4	10	2	0	0	0	0	2	79	178	1008	142	24	68	156	k__Bacteria;p__Proteobacteria;c__Alphaproteobacteria;o__Rhizobiales;f__Hyphomicrobiaceae;g__Hyphomicrobium
OTU_94	26	30	30	22	11	25	69	581	k__Bacteria;p__Proteobacteria;c__Alphaproteobacteria;o__Acetobacterales;f__Acetobacteraceae	54	15	7	21	32	36	28	45	17	24	37	4	7	14	11	19	16	40	30	113	63	1261	228	252	k__Bacteria;p__Proteobacteria;c__Alphaproteobacteria;o__Acetobacterales;f__Acetobacteraceae
OTU_95	121	102	36	13	131	119	5	0	k__Bacteria;p__Desulfobacterota;c__Desulfuromonadia;o__Geobacterales;f__Geobacteraceae;g__Geobacter;s__Geobacter_anodireducens	172	130	61	64	73	167	83	19	5	11	20	8	13	365	14	7	350	0	13	0	0	0	0	0	k__Bacteria;p__Desulfobacterota;c__Desulfuromonadia;o__Geobacterales;f__Geobacteraceae;g__Geobacter;s__Geobacter_anodireducens
OTU_96	26	19	26	0	16	3	120	127	k__Bacteria;p__Proteobacteria;c__Gammaproteobacteria;o__Burkholderiales;f__B1-7BS;g__B1-7BS;s__	42	22	13	10	8	38	20	2	54	0	0	0	0	48	0	0	0	8	84	16	260	331	11	39	k__Bacteria;p__Proteobacteria;c__Gammaproteobacteria;o__Burkholderiales;f__B1-7BS;g__B1-7BS;s__
OTU_97	18	333	3	8	1	407	0	1	k__Bacteria;p__Proteobacteria;c__Gammaproteobacteria;o__Burkholderiales;f__Alcaligenaceae;g__Alcaligenes	0	54	0	0	0	997	1	7	0	0	0	24	2	0	1	0	1220	0	0	0	0	1	1	0	k__Bacteria;p__Proteobacteria;c__Gammaproteobacteria;o__Burkholderiales;f__Alcaligenaceae;g__Alcaligenes
OTU_98	0	0	35	1	0	1	650	18	k__Bacteria;p__Planctomycetota;c__Planctomycetes;o__;f__;g__;s__	0	0	0	0	0	0	8	95	1	0	1	0	0	0	0	0	0	3	345	1478	125	2	11	41	k__Bacteria;p__Planctomycetota;c__Planctomycetes;o__;f__;g__;s__
OTU_99	21	21	64	21	7	24	364	450	k__Bacteria;p__Proteobacteria;c__Alphaproteobacteria;o__Rhizobiales	39	12	12	15	36	12	52	64	75	53	7	1	5	12	3	9	2	61	290	339	462	786	351	213	k__Bacteria;p__Proteobacteria;c__Alphaproteobacteria;o__Rhizobiales
OTU_100	28	12	218	11	1	29	711	265	k__Bacteria;p__Proteobacteria;c__Alphaproteobacteria;o__Reyranellales;f__Reyranellaceae;g__Reyranella;s__	33	32	18	6	10	18	452	113	88	15	11	7	2	0	0	0	2	84	1276	417	439	356	181	256	k__Bacteria;p__Proteobacteria;c__Alphaproteobacteria;o__Reyranellales;f__Reyranellaceae;g__Reyranella;s__
OTU_101	25	24	28	71	9	30	90	498	k__Bacteria;p__Proteobacteria;c__Alphaproteobacteria;o__Sphingomonadales;f__Sphingomonadaceae;g__Porphyrobacter;s__	46	6	21	2	59	9	33	40	9	186	22	4	17	1	9	19	6	65	102	73	93	78	1076	340	k__Bacteria;p__Proteobacteria;c__Alphaproteobacteria;o__Sphingomonadales;f__Sphingomonadaceae;g__Porphyrobacter;s__
OTU_102	94	375	2	3	106	18	10	15	k__Bacteria;p__Proteobacteria;c__Alphaproteobacteria;o__Rhizobiales;f__Rhizobiales_Incertae_Sedis;g__Phreatobacter;s__	151	62	68	909	57	157	0	0	6	4	4	0	5	0	313	0	51	3	5	4	19	6	20	19	k__Bacteria;p__Proteobacteria;c__Alphaproteobacteria;o__Rhizobiales;f__Rhizobiales_Incertae_Sedis;g__Phreatobacter;s__
OTU_103	0	1	93	1	1	14	477	55	k__Bacteria;p__Proteobacteria;c__Alphaproteobacteria;o__Rhizobiales;f__Xanthobacteraceae;g__	0	0	0	0	0	1	241	2	34	0	1	0	0	1	0	0	0	41	1015	55	361	58	35	72	k__Bacteria;p__Proteobacteria;c__Alphaproteobacteria;o__Rhizobiales;f__Xanthobacteraceae;g__
OTU_104	4	3	141	0	3	10	502	47	k__Bacteria;p__Actinobacteriota;c__Thermoleophilia;o__Solirubrobacterales	1	8	1	6	0	1	220	202	0	0	0	0	0	2	5	0	0	29	688	748	69	7	50	83	k__Bacteria;p__Actinobacteriota;c__Thermoleophilia;o__Solirubrobacterales
OTU_105	6	1	61	585	41	33	0	46	k__Bacteria;p__Firmicutes;c__Clostridia;o__Lachnospirales;f__Lachnospiraceae;g__Fusicatenibacter;s__	3	1	12	1	0	0	95	50	38	1667	53	33	60	22	39	36	62	0	0	0	0	2	134	1	k__Bacteria;p__Firmicutes;c__Clostridia;o__Lachnospirales;f__Lachnospiraceae;g__Fusicatenibacter;s__
OTU_106	5	4	24	2	0	4	531	97	k__Bacteria;p__Bacteroidota;c__Bacteroidia;o__Chitinophagales;f__Chitinophagaceae;g__Dinghuibacter;s__	7	8	0	0	8	3	7	23	41	3	3	0	0	0	0	0	0	10	204	173	1216	61	102	127	k__Bacteria;p__Bacteroidota;c__Bacteroidia;o__Chitinophagales;f__Chitinophagaceae;g__Dinghuibacter;s__
OTU_107	100	158	350	21	48	47	812	136	k__Bacteria;p__Proteobacteria;c__Gammaproteobacteria;o__Burkholderiales;f__Comamonadaceae;g__Paucibacter	61	37	200	254	186	32	277	732	41	14	34	14	45	14	83	62	38	40	1903	390	142	47	55	304	k__Bacteria;p__Proteobacteria;c__Gammaproteobacteria;o__Burkholderiales;f__Comamonadaceae;g__Paucibacter
OTU_108	20	32	34	14	32	22	79	106	k__Bacteria;p__Proteobacteria;c__Alphaproteobacteria;o__Rhizobiales;f__Beijerinckiaceae;g__Methylocystis;s__	33	13	14	45	22	27	50	36	14	10	23	8	9	66	19	11	11	42	134	71	30	207	61	50	k__Bacteria;p__Proteobacteria;c__Alphaproteobacteria;o__Rhizobiales;f__Beijerinckiaceae;g__Methylocystis;s__
OTU_109	4	1	82	2	2	7	427	17	k__Bacteria;p__Proteobacteria;c__Alphaproteobacteria;o__Acetobacterales;f__Acetobacteraceae;g__;s__	3	6	2	1	1	1	7	233	4	0	0	4	0	6	0	0	0	19	54	1169	56	0	5	45	k__Bacteria;p__Proteobacteria;c__Alphaproteobacteria;o__Acetobacterales;f__Acetobacteraceae;g__;s__
OTU_110	0	0	92	0	1	21	493	41	k__Bacteria;p__Myxococcota;c__Polyangia;o__Haliangiales;f__Haliangiaceae;g__Haliangium;s__	0	0	0	0	0	0	0	0	274	0	0	0	1	0	0	0	0	61	84	52	1342	0	45	77	k__Bacteria;p__Myxococcota;c__Polyangia;o__Haliangiales;f__Haliangiaceae;g__Haliangium;s__
OTU_111	12	7	73	46	18	52	212	267	k__Bacteria;p__Proteobacteria;c__Alphaproteobacteria;o__Rhizobiales;f__Devosiaceae;g__Devosia;s__	32	3	1	12	3	4	134	34	50	110	22	6	21	5	28	20	25	111	363	55	218	99	512	189	k__Bacteria;p__Proteobacteria;c__Alphaproteobacteria;o__Rhizobiales;f__Devosiaceae;g__Devosia;s__
OTU_112	6	8	98	4	1	12	558	39	k__Bacteria;p__Proteobacteria;c__Alphaproteobacteria;o__Acetobacterales;f__Acetobacteraceae	11	3	2	0	22	2	68	220	4	7	4	0	0	1	1	8	0	27	250	1369	55	3	46	68	k__Bacteria;p__Proteobacteria;c__Alphaproteobacteria;o__Acetobacterales;f__Acetobacteraceae
OTU_113	0	0	39	0	0	4	641	25	k__Bacteria;p__Bacteroidota;c__Bacteroidia;o__Cytophagales;f__Spirosomaceae;g__;s__	0	0	0	0	0	0	85	30	0	0	0	0	0	0	0	0	0	10	1396	495	31	0	19	56	k__Bacteria;p__Bacteroidota;c__Bacteroidia;o__Cytophagales;f__Spirosomaceae;g__;s__
OTU_114	0	0	27	0	0	8	745	15	k__Bacteria	0	0	0	0	0	0	0	0	80	0	0	0	0	0	0	0	0	24	37	14	2182	0	15	28	k__Bacteria
OTU_115	5	1	81	467	29	38	0	46	k__Bacteria;p__Firmicutes;c__Clostridia;o__Lachnospirales;f__Lachnospiraceae;g__Dorea;s__	7	0	8	0	3	0	119	79	43	1320	45	34	33	19	34	28	84	0	0	0	0	0	135	2	k__Bacteria;p__Firmicutes;c__Clostridia;o__Lachnospirales;f__Lachnospiraceae;g__Dorea;s__
OTU_116	4	1	4	726	3	4	0	1	k__Bacteria;p__Fusobacteriota;c__Fusobacteriia;o__Fusobacteriales;f__Fusobacteriaceae;g__Fusobacterium	0	1	9	2	0	0	3	9	0	2175	0	1	3	0	4	0	1	11	0	0	0	0	0	2	k__Bacteria;p__Fusobacteriota;c__Fusobacteriia;o__Fusobacteriales;f__Fusobacteriaceae;g__Fusobacterium
OTU_117	3	5	104	45	52	126	10	14	k__Bacteria;p__Proteobacteria;c__Alphaproteobacteria;o__Rhizobiales;f__Devosiaceae;g__Devosia;s__Devosia_riboflavina	6	0	1	1	12	0	138	95	79	49	44	41	39	17	99	67	64	246	7	3	18	13	20	9	k__Bacteria;p__Proteobacteria;c__Alphaproteobacteria;o__Rhizobiales;f__Devosiaceae;g__Devosia;s__Devosia_riboflavina
OTU_118	230	113	278	36	82	72	777	366	k__Bacteria;p__Proteobacteria;c__Alphaproteobacteria;o__Sphingomonadales;f__Sphingomonadaceae	230	50	410	211	75	53	548	13	272	29	76	2	116	23	105	10	16	188	1265	137	927	34	242	822	k__Bacteria;p__Proteobacteria;c__Alphaproteobacteria;o__Sphingomonadales;f__Sphingomonadaceae
OTU_119	0	0	0	371	0	0	0	0	k__Bacteria	0	0	0	0	0	0	0	0	0	1107	5	0	0	0	0	0	0	0	0	0	0	0	0	0	k__Bacteria
OTU_120	3	2	42	0	1	5	654	32	k__Bacteria;p__Proteobacteria;c__Gammaproteobacteria;o__Burkholderiales;f__Comamonadaceae;g__Methylibium	7	1	1	5	1	0	120	2	2	0	0	0	0	1	0	0	1	13	1827	38	95	43	17	34	k__Bacteria;p__Proteobacteria;c__Gammaproteobacteria;o__Burkholderiales;f__Comamonadaceae;g__Methylibium
OTU_121	199	2	5	6	2	0	0	0	k__Bacteria	132	230	235	2	0	3	2	5	7	7	6	5	6	0	0	0	0	0	0	0	0	0	0	0	k__Bacteria
OTU_122	9	4	136	82	43	130	59	35	k__Bacteria;p__Proteobacteria;c__Alphaproteobacteria;o__Sphingomonadales;f__Sphingomonadaceae;g__Sphingomonas	13	9	4	5	7	0	159	109	138	153	55	36	51	18	58	54	62	274	51	4	120	55	25	23	k__Bacteria;p__Proteobacteria;c__Alphaproteobacteria;o__Sphingomonadales;f__Sphingomonadaceae;g__Sphingomonas
OTU_123	89	24	118	4	2	10	403	73	k__Bacteria;p__Proteobacteria;c__Gammaproteobacteria;o__Burkholderiales;f__Burkholderiaceae;g__Polynucleobacter	65	165	37	16	37	17	48	297	8	5	2	4	3	0	2	8	0	21	179	952	77	68	66	83	k__Bacteria;p__Proteobacteria;c__Gammaproteobacteria;o__Burkholderiales;f__Burkholderiaceae;g__Polynucleobacter
OTU_124	659	186	84	39	24	16	1011	358	k__Bacteria;p__Proteobacteria;c__Gammaproteobacteria;o__Burkholderiales;f__Comamonadaceae	1439	390	147	308	125	124	134	46	72	37	61	17	7	39	26	5	13	30	1495	480	1058	562	47	463	k__Bacteria;p__Proteobacteria;c__Gammaproteobacteria;o__Burkholderiales;f__Comamonadaceae
OTU_125	0	2	1	602	0	6	0	0	k__Bacteria;p__Proteobacteria;c__Gammaproteobacteria;o__Xanthomonadales;f__Xanthomonadaceae;g__Stenotrophomonas;s__Stenotrophomonas_acidaminiphila	0	0	0	0	0	4	0	0	2	1804	0	0	0	0	0	0	16	0	0	0	0	0	0	0	k__Bacteria;p__Proteobacteria;c__Gammaproteobacteria;o__Xanthomonadales;f__Xanthomonadaceae;g__Stenotrophomonas;s__Stenotrophomonas_acidaminiphila
OTU_126	75	204	2	48	2	360	0	0	k__Bacteria;p__Bacteroidota;c__Bacteroidia;o__Bacteroidales;f__Dysgonomonadaceae;g__Proteiniphilum;s__Porphyromonadaceae_bacterium	5	217	1	5	0	606	4	2	0	0	1	143	0	4	0	0	1079	0	0	0	0	0	0	0	k__Bacteria;p__Bacteroidota;c__Bacteroidia;o__Bacteroidales;f__Dysgonomonadaceae;g__Proteiniphilum;s__Porphyromonadaceae_bacterium
OTU_127	0	27	1	0	181	231	1	1	Unknown	0	0	0	3	0	77	1	0	0	0	0	0	0	0	541	0	11	680	1	0	1	0	1	2	Unknown
OTU_128	112	275	29	6	71	28	80	86	k__Bacteria;p__Proteobacteria;c__Gammaproteobacteria;o__Burkholderiales;f__Methylophilaceae;g__Methylophilus	112	51	171	548	77	198	22	22	42	7	6	3	35	4	173	19	29	34	16	8	216	194	14	48	k__Bacteria;p__Proteobacteria;c__Gammaproteobacteria;o__Burkholderiales;f__Methylophilaceae;g__Methylophilus
OTU_129	1400	2	21	9	10	0	0	1	Unknown	835	1040	2323	0	0	4	7	3	52	6	8	12	27	1	0	0	0	0	0	0	0	0	0	2	Unknown
OTU_130	36	51	64	5	14	10	196	93	k__Bacteria;p__Proteobacteria;c__Alphaproteobacteria;o__Rhizobiales;f__Rhizobiales_Incertae_Sedis;g__;s__	72	25	10	125	14	12	47	12	131	2	12	1	1	5	35	3	0	25	113	48	425	156	54	69	k__Bacteria;p__Proteobacteria;c__Alphaproteobacteria;o__Rhizobiales;f__Rhizobiales_Incertae_Sedis;g__;s__
OTU_131	46	9	70	12	20	32	156	67	k__Bacteria;p__Proteobacteria;c__Alphaproteobacteria;o__Sphingomonadales;f__Sphingomonadaceae;g__Sphingopyxis	27	7	104	7	4	16	113	6	89	16	12	6	27	14	18	13	19	63	209	20	239	15	39	147	k__Bacteria;p__Proteobacteria;c__Alphaproteobacteria;o__Sphingomonadales;f__Sphingomonadaceae;g__Sphingopyxis
OTU_132	30	626	1	0	30	1	1	2	k__Bacteria;p__Bacteroidota;c__Bacteroidia;o__Cytophagales;f__Spirosomaceae;g__Emticicia;s__	37	26	26	1784	25	67	0	1	0	0	0	0	0	0	88	0	1	0	0	1	0	3	1	1	k__Bacteria;p__Bacteroidota;c__Bacteroidia;o__Cytophagales;f__Spirosomaceae;g__Emticicia;s__
OTU_133	0	12	41	0	0	4	497	16	k__Bacteria;p__Verrucomicrobiota;c__Verrucomicrobiae;o__Verrucomicrobiales;f__Verrucomicrobiaceae;g__Brevifollis;s__	0	0	0	5	30	0	119	2	1	0	0	0	0	0	0	2	0	9	1395	30	66	8	13	25	k__Bacteria;p__Verrucomicrobiota;c__Verrucomicrobiae;o__Verrucomicrobiales;f__Verrucomicrobiaceae;g__Brevifollis;s__
OTU_134	4	14	0	25	0	3	11	849	k__Bacteria;p__Fibrobacterota;c__Fibrobacteria;o__Fibrobacterales;f__Fibrobacteraceae;g__;s__	8	1	1	0	40	0	0	0	0	63	10	0	0	0	0	2	0	5	10	5	17	0	2060	485	k__Bacteria;p__Fibrobacterota;c__Fibrobacteria;o__Fibrobacterales;f__Fibrobacteraceae;g__;s__
OTU_135	443	50	5	1	56	2	34	21	k__Bacteria;p__Actinobacteriota;c__Actinobacteria;o__Corynebacteriales;f__Mycobacteriaceae;g__Mycobacterium	74	49	1206	96	21	31	3	0	11	0	1	0	145	1	21	0	0	5	8	3	89	46	6	9	k__Bacteria;p__Actinobacteriota;c__Actinobacteria;o__Corynebacteriales;f__Mycobacteriaceae;g__Mycobacterium
OTU_136	985	2	226	641	14	0	1	1	k__Bacteria	455	1157	1341	0	0	4	68	158	450	1631	190	102	32	8	1	0	0	0	0	0	2	0	1	2	k__Bacteria
OTU_137	103	0	5	139	1	2	1	66	Unknown	307	0	2	0	0	0	9	4	0	43	369	3	2	0	0	2	0	4	1	0	0	0	0	196	Unknown
OTU_138	93	11	72	6	1	4	298	23	k__Bacteria;p__Proteobacteria;c__Gammaproteobacteria;o__Burkholderiales;f__Burkholderiaceae;g__Lautropia;s__	165	102	11	14	6	13	198	12	5	0	8	8	0	3	0	0	0	10	769	63	62	0	15	54	k__Bacteria;p__Proteobacteria;c__Gammaproteobacteria;o__Burkholderiales;f__Burkholderiaceae;g__Lautropia;s__
OTU_139	0	0	35	0	0	4	516	14	k__Bacteria;p__Bacteroidota;c__Bacteroidia;o__Cytophagales;f__Cytophagaceae;g__Cytophaga	0	0	0	0	0	0	105	0	0	0	0	0	0	0	0	0	0	11	1507	15	24	2	20	20	k__Bacteria;p__Bacteroidota;c__Bacteroidia;o__Cytophagales;f__Cytophagaceae;g__Cytophaga
OTU_140	6	3	0	685	1	0	2	3	k__Bacteria;p__Firmicutes;c__Clostridia;o__Clostridiales;f__Clostridiaceae;g__Clostridium_sensu_stricto_12;s__Clostridium_tyrobutyricum	13	2	2	1	3	3	0	0	0	2052	2	0	1	0	0	0	0	0	2	1	2	0	1	6	k__Bacteria;p__Firmicutes;c__Clostridia;o__Clostridiales;f__Clostridiaceae;g__Clostridium_sensu_stricto_12;s__Clostridium_tyrobutyricum
OTU_141	17	370	0	5	0	11	2	86	k__Bacteria;p__Cyanobacteria;c__Cyanobacteriia;o__Chloroplast;f__Chloroplast;g__Chloroplast;s__Mychonastes_jurisii	27	11	11	6	1098	6	0	0	0	11	1	1	0	0	0	27	0	4	5	0	0	2	196	58	k__Bacteria;p__Cyanobacteria;c__Cyanobacteriia;o__Chloroplast;f__Chloroplast;g__Chloroplast;s__Mychonastes_jurisii
OTU_142	53	101	1	52	0	159	0	0	k__Bacteria;p__Firmicutes;c__Clostridia;o__Caldicoprobacterales;f__Caldicoprobacteraceae;g__Caldicoprobacter;s__anaerobic_digester	0	157	0	0	0	302	2	0	0	0	0	156	0	0	0	2	475	0	0	0	0	0	0	0	k__Bacteria;p__Firmicutes;c__Clostridia;o__Caldicoprobacterales;f__Caldicoprobacteraceae;g__Caldicoprobacter;s__anaerobic_digester
OTU_143	4	1	53	1	0	3	960	12	k__Bacteria;p__Planctomycetota;c__Planctomycetes;o__Gemmatales;f__Gemmataceae;g__Gemmata	2	8	1	1	0	1	3	155	0	0	1	1	0	0	0	0	0	9	51	2796	31	1	7	26	k__Bacteria;p__Planctomycetota;c__Planctomycetes;o__Gemmatales;f__Gemmataceae;g__Gemmata
OTU_144	0	0	27	1	0	2	443	8	k__Bacteria;p__Verrucomicrobiota;c__Verrucomicrobiae;o__Pedosphaerales;f__Pedosphaeraceae;g__DEV114;s__	0	0	0	0	0	0	0	79	1	1	0	0	0	0	0	0	0	5	34	1231	64	0	7	16	k__Bacteria;p__Verrucomicrobiota;c__Verrucomicrobiae;o__Pedosphaerales;f__Pedosphaeraceae;g__DEV114;s__
OTU_145	1	5	223	1	0	4	95	1	k__Bacteria;p__Firmicutes;c__Clostridia;o__Christensenellales;f__Christensenellaceae;g__Christensenellaceae_R-7_group;s__	0	1	0	0	0	15	667	0	0	0	0	2	0	0	0	0	12	0	284	0	0	0	0	1	k__Bacteria;p__Firmicutes;c__Clostridia;o__Christensenellales;f__Christensenellaceae;g__Christensenellaceae_R-7_group;s__
OTU_146	5	7	59	0	4	5	196	19	k__Bacteria;p__Proteobacteria;c__Gammaproteobacteria;o__Burkholderiales;f__Nitrosomonadaceae;g__;s__	6	4	3	3	4	13	2	173	0	0	0	0	0	12	0	0	0	14	29	531	26	11	13	31	k__Bacteria;p__Proteobacteria;c__Gammaproteobacteria;o__Burkholderiales;f__Nitrosomonadaceae;g__;s__
OTU_147	8	0	72	369	58	40	2	34	k__Bacteria;p__Firmicutes;c__Clostridia;o__Lachnospirales;f__Lachnospiraceae;g__Ruminococcus_torques_group	4	0	20	0	0	0	92	83	40	1030	42	34	86	44	43	35	81	2	4	0	0	2	94	6	k__Bacteria;p__Firmicutes;c__Clostridia;o__Lachnospirales;f__Lachnospiraceae;g__Ruminococcus_torques_group
OTU_148	0	0	21	0	0	1	393	7	k__Bacteria;p__Verrucomicrobiota;c__Verrucomicrobiae;o__Pedosphaerales;f__Pedosphaeraceae;g__SH3-11;s__	0	0	0	0	0	0	63	0	0	0	0	0	0	0	0	0	0	2	1156	12	9	0	5	14	k__Bacteria;p__Verrucomicrobiota;c__Verrucomicrobiae;o__Pedosphaerales;f__Pedosphaeraceae;g__SH3-11;s__
OTU_149	10	1	38	22	23	56	2	11	k__Bacteria;p__Proteobacteria;c__Alphaproteobacteria;o__Caulobacterales;f__Caulobacteraceae;g__Asticcacaulis;s__Asticcacaulis_sp.	9	1	18	0	0	3	49	45	20	28	20	17	24	14	30	16	51	100	2	0	4	19	2	11	k__Bacteria;p__Proteobacteria;c__Alphaproteobacteria;o__Caulobacterales;f__Caulobacteraceae;g__Asticcacaulis;s__Asticcacaulis_sp.
OTU_150	3	3	13	3	1	2	259	46	k__Bacteria;p__Planctomycetota;c__Planctomycetes;o__Gemmatales;f__Gemmataceae;g__;s__	7	0	0	0	6	2	3	32	3	6	2	1	0	1	0	0	0	5	14	701	62	0	76	62	k__Bacteria;p__Planctomycetota;c__Planctomycetes;o__Gemmatales;f__Gemmataceae;g__;s__
OTU_151	7	4	0	29	0	7	21	434	k__Bacteria;p__Proteobacteria;c__Gammaproteobacteria;o__Burkholderiales;f__Rhodocyclaceae	18	1	2	1	9	0	0	0	0	70	15	2	0	0	0	1	0	20	19	18	24	0	1082	219	k__Bacteria;p__Proteobacteria;c__Gammaproteobacteria;o__Burkholderiales;f__Rhodocyclaceae
OTU_152	58	1	92	773	119	49	3	44	k__Bacteria;p__Firmicutes;c__Clostridia;o__Oscillospirales;f__Ruminococcaceae;g__Faecalibacterium;s__Faecalibacterium_prausnitzii	12	3	159	1	0	1	152	78	44	2255	42	22	285	25	47	38	82	26	2	4	2	5	110	15	k__Bacteria;p__Firmicutes;c__Clostridia;o__Oscillospirales;f__Ruminococcaceae;g__Faecalibacterium;s__Faecalibacterium_prausnitzii
OTU_153	0	0	28	0	0	1	378	9	k__Bacteria;p__Patescibacteria;c__Saccharimonadia;o__Saccharimonadales;f__Saccharimonadales;g__Saccharimonadales;s__	0	0	0	0	0	0	0	84	0	0	0	0	0	0	0	0	0	3	12	1103	17	2	11	14	k__Bacteria;p__Patescibacteria;c__Saccharimonadia;o__Saccharimonadales;f__Saccharimonadales;g__Saccharimonadales;s__
OTU_154	3	2	50	2	3	10	437	28	k__Bacteria;p__Gemmatimonadota;c__Gemmatimonadetes;o__Gemmatimonadales;f__Gemmatimonadaceae	7	0	1	0	2	2	10	2	137	0	3	2	1	1	6	9	2	18	60	38	1211	5	26	53	k__Bacteria;p__Gemmatimonadota;c__Gemmatimonadetes;o__Gemmatimonadales;f__Gemmatimonadaceae
OTU_155	31	277	1	0	17	0	0	15	k__Bacteria;p__Bacteroidota;c__Bacteroidia;o__Chitinophagales	43	31	18	773	21	37	0	1	0	0	0	0	0	5	44	0	0	0	0	0	0	44	0	0	k__Bacteria;p__Bacteroidota;c__Bacteroidia;o__Chitinophagales
OTU_156	45	100	5	9	4	7	51	361	k__Bacteria;p__Bacteroidota;c__Bacteroidia;o__Cytophagales;f__Spirosomaceae;g__Emticicia;s__	54	14	67	9	4	285	9	0	4	1	19	5	3	7	1	0	15	6	97	11	44	1	118	964	k__Bacteria;p__Bacteroidota;c__Bacteroidia;o__Cytophagales;f__Spirosomaceae;g__Emticicia;s__
OTU_157	14	3	59	4	3	11	203	199	k__Bacteria;p__Proteobacteria;c__Alphaproteobacteria;o__Rhizobiales;f__Xanthobacteraceae	14	14	13	6	0	3	78	75	23	1	8	1	2	6	1	1	0	32	324	196	88	501	19	75	k__Bacteria;p__Proteobacteria;c__Alphaproteobacteria;o__Rhizobiales;f__Xanthobacteraceae
OTU_158	16	184	0	9	0	346	1	0	k__Bacteria;p__Firmicutes;c__Limnochordia;o__M55-D21;f__M55-D21;g__M55-D21;s__	0	48	0	0	0	550	0	0	0	0	0	25	0	0	0	0	1037	0	0	1	0	0	0	0	k__Bacteria;p__Firmicutes;c__Limnochordia;o__M55-D21;f__M55-D21;g__M55-D21;s__
OTU_159	1	3	229	1	0	4	96	0	k__Bacteria;p__Bacteroidota;c__Bacteroidia;o__Bacteroidales;f__Prolixibacteraceae;g__;s__	1	2	0	0	0	9	685	0	0	0	1	1	0	0	0	0	9	1	287	0	0	0	0	0	k__Bacteria;p__Bacteroidota;c__Bacteroidia;o__Bacteroidales;f__Prolixibacteraceae;g__;s__
OTU_160	25	0	154	215	19	21	3	10	k__Bacteria;p__Firmicutes;c__Bacilli;o__Erysipelotrichales;f__Erysipelatoclostridiaceae;g__Erysipelatoclostridium;s__	48	26	0	0	0	0	204	223	34	93	315	236	15	17	24	9	52	0	6	3	0	0	0	30	k__Bacteria;p__Firmicutes;c__Bacilli;o__Erysipelotrichales;f__Erysipelatoclostridiaceae;g__Erysipelatoclostridium;s__
OTU_161	85	0	489	769	72	70	17	53	k__Bacteria;p__Firmicutes;c__Bacilli;o__Erysipelotrichales;f__Erysipelotrichaceae;g__Dubosiella;s__	159	95	0	0	0	0	647	694	124	346	1123	837	74	41	99	60	135	15	23	27	0	1	15	142	k__Bacteria;p__Firmicutes;c__Bacilli;o__Erysipelotrichales;f__Erysipelotrichaceae;g__Dubosiella;s__
OTU_162	2	1	64	2	1	8	311	55	k__Bacteria;p__Acidobacteriota;c__Acidobacteriae;o__Bryobacterales;f__Bryobacteraceae;g__Bryobacter;s__Acidobacteria_bacterium	3	0	1	3	0	0	76	112	4	2	4	0	0	0	2	0	0	23	395	476	61	27	36	101	k__Bacteria;p__Acidobacteriota;c__Acidobacteriae;o__Bryobacterales;f__Bryobacteraceae;g__Bryobacter;s__Acidobacteria_bacterium
OTU_163	14	107	2	12	1	9	39	282	k__Bacteria;p__Bacteroidota;c__Bacteroidia;o__Cytophagales;f__Spirosomaceae	26	9	6	7	305	8	0	0	5	29	6	0	1	0	0	21	1	4	22	6	89	0	650	194	k__Bacteria;p__Bacteroidota;c__Bacteroidia;o__Cytophagales;f__Spirosomaceae
OTU_164	24	5	140	7	4	22	500	52	k__Bacteria;p__Actinobacteriota;c__Acidimicrobiia;o__Microtrichales;f__;g__;s__	26	44	1	5	4	4	126	278	16	6	12	3	0	3	7	5	8	53	399	996	103	12	38	104	k__Bacteria;p__Actinobacteriota;c__Acidimicrobiia;o__Microtrichales;f__;g__;s__
OTU_165	7	3	0	0	4	0	0	8	k__Bacteria;p__Verrucomicrobiota;c__Verrucomicrobiae;o__Pedosphaerales;f__Pedosphaeraceae;g__SH3-11;s__	14	2	3	0	0	7	0	0	0	0	0	0	0	12	0	0	0	0	0	0	0	8	0	16	k__Bacteria;p__Verrucomicrobiota;c__Verrucomicrobiae;o__Pedosphaerales;f__Pedosphaeraceae;g__SH3-11;s__
OTU_166	2	1	23	449	12	15	0	13	k__Bacteria;p__Actinobacteriota;c__Actinobacteria;o__Bifidobacteriales;f__Bifidobacteriaceae;g__Bifidobacterium;s__Bifidobacterium_longum	5	0	0	0	0	1	45	15	8	1324	13	10	10	10	15	18	25	0	0	0	0	5	33	1	k__Bacteria;p__Actinobacteriota;c__Actinobacteria;o__Bifidobacteriales;f__Bifidobacteriaceae;g__Bifidobacterium;s__Bifidobacterium_longum
OTU_167	1	6	0	5	1	0	2	292	k__Bacteria;p__Planctomycetota;c__Phycisphaerae;o__Tepidisphaerales;f__Tepidisphaeraceae;g__Tepidisphaeraceae;s__	1	0	0	0	17	0	0	0	0	12	2	0	2	0	0	0	0	0	1	3	2	0	625	251	k__Bacteria;p__Planctomycetota;c__Phycisphaerae;o__Tepidisphaerales;f__Tepidisphaeraceae;g__Tepidisphaeraceae;s__
OTU_168	9	0	27	1335	34	15	1	8	k__Bacteria;p__Bacteroidota;c__Bacteroidia;o__Bacteroidales;f__Bacteroidaceae;g__Bacteroides;s__Bacteroides_vulgatus	1	2	23	0	0	0	60	14	6	3973	17	15	51	5	46	2	33	9	1	0	0	1	19	2	k__Bacteria;p__Bacteroidota;c__Bacteroidia;o__Bacteroidales;f__Bacteroidaceae;g__Bacteroides;s__Bacteroides_vulgatus
OTU_169	4	2	63	3	1	10	357	66	k__Bacteria;p__Actinobacteriota;c__Acidimicrobiia;o__Microtrichales;f__;g__;s__	8	1	1	4	0	0	1	0	188	0	7	0	0	0	1	0	2	26	56	41	972	42	31	125	k__Bacteria;p__Actinobacteriota;c__Acidimicrobiia;o__Microtrichales;f__;g__;s__
OTU_170	0	0	170	1	2	16	297	42	k__Bacteria;p__Proteobacteria;c__Gammaproteobacteria;o__Ga0077536;f__Ga0077536;g__Ga0077536;s__	0	0	0	0	0	0	393	104	13	0	1	0	3	0	2	1	0	46	603	170	116	7	43	75	k__Bacteria;p__Proteobacteria;c__Gammaproteobacteria;o__Ga0077536;f__Ga0077536;g__Ga0077536;s__
OTU_171	14	14	15	34	1	14	210	1226	k__Bacteria;p__Bdellovibrionota;c__Oligoflexia;o__Oligoflexales;f__Oligoflexales;g__Oligoflexus;s__	34	4	4	0	37	4	12	9	23	91	10	0	2	0	0	1	2	38	180	83	367	1	2914	761	k__Bacteria;p__Bdellovibrionota;c__Oligoflexia;o__Oligoflexales;f__Oligoflexales;g__Oligoflexus;s__
OTU_172	15	108	1	21	0	214	0	0	k__Bacteria;p__Firmicutes;c__Clostridia;o__Oscillospirales	1	42	0	0	0	324	1	1	1	0	0	61	0	0	0	0	640	0	0	0	0	0	0	0	k__Bacteria;p__Firmicutes;c__Clostridia;o__Oscillospirales
OTU_173	22	11	138	37	37	60	173	103	k__Bacteria;p__Proteobacteria;c__Gammaproteobacteria;o__Xanthomonadales;f__Xanthomonadaceae;g__Pseudoxanthomonas	50	5	11	12	3	17	174	177	62	31	52	27	23	57	31	20	40	119	230	206	82	1	53	253	k__Bacteria;p__Proteobacteria;c__Gammaproteobacteria;o__Xanthomonadales;f__Xanthomonadaceae;g__Pseudoxanthomonas
OTU_174	18	23	4	6	13	5	30	147	k__Bacteria;p__Proteobacteria;c__Alphaproteobacteria;o__Rhodobacterales;f__Rhodobacteraceae;g__Rubellimicrobium;s__	38	9	7	19	14	34	5	1	4	7	8	1	1	34	4	0	5	10	30	29	31	64	41	335	k__Bacteria;p__Proteobacteria;c__Alphaproteobacteria;o__Rhodobacterales;f__Rhodobacteraceae;g__Rubellimicrobium;s__
OTU_175	10	71	3	2	339	393	0	1	k__Bacteria	2	0	26	46	30	137	3	4	2	0	4	1	512	111	393	149	986	44	0	0	0	0	1	0	k__Bacteria
OTU_176	7	96	1	0	5	0	1	232	k__Bacteria;p__Bacteroidota;c__Bacteroidia;o__Chitinophagales;f__Saprospiraceae;g__Phaeodactylibacter;s__	14	5	1	269	2	16	0	0	1	0	0	0	0	0	15	0	0	0	0	0	3	696	0	0	k__Bacteria;p__Bacteroidota;c__Bacteroidia;o__Chitinophagales;f__Saprospiraceae;g__Phaeodactylibacter;s__
OTU_177	8	6	9	6	1	7	65	243	k__Bacteria;p__Proteobacteria;c__Alphaproteobacteria;o__Acetobacterales;f__Acetobacteraceae	16	4	4	2	1	13	0	23	2	7	10	0	0	1	2	1	8	11	17	167	11	608	25	94	k__Bacteria;p__Proteobacteria;c__Alphaproteobacteria;o__Acetobacterales;f__Acetobacteraceae
OTU_178	22	28	30	18	15	37	52	176	k__Bacteria;p__Proteobacteria;c__Alphaproteobacteria;o__Rhizobiales;f__Rhizobiales_Incertae_Sedis;g__Phreatobacter;s__	47	2	17	25	42	16	34	26	29	28	16	9	12	13	20	34	14	62	38	23	93	31	314	182	k__Bacteria;p__Proteobacteria;c__Alphaproteobacteria;o__Rhizobiales;f__Rhizobiales_Incertae_Sedis;g__Phreatobacter;s__
OTU_179	2	22	18	0	1	1	463	10	k__Bacteria;p__Verrucomicrobiota;c__Verrucomicrobiae;o__Pedosphaerales;f__Pedosphaeraceae;g__Pedosphaeraceae;s__	4	0	0	63	1	0	44	4	6	0	0	0	2	0	1	0	0	1	966	94	329	5	7	18	k__Bacteria;p__Verrucomicrobiota;c__Verrucomicrobiae;o__Pedosphaerales;f__Pedosphaeraceae;g__Pedosphaeraceae;s__
OTU_180	0	0	68	0	0	3	250	15	k__Bacteria;p__Myxococcota;c__Polyangia;o__Polyangiales;f__BIrii41;g__BIrii41;s__	0	0	0	0	0	0	203	0	0	0	0	0	0	0	0	0	0	9	694	23	31	0	15	30	k__Bacteria;p__Myxococcota;c__Polyangia;o__Polyangiales;f__BIrii41;g__BIrii41;s__
OTU_181	0	0	0	312	0	0	0	0	k__Bacteria;p__Firmicutes;c__Clostridia;o__Oscillospirales;f__Oscillospiraceae;g__Oscillibacter;s__Oscillibacter_ruminantium	0	0	0	0	0	0	0	0	0	935	0	0	0	0	0	0	0	0	0	0	0	0	0	0	k__Bacteria;p__Firmicutes;c__Clostridia;o__Oscillospirales;f__Oscillospiraceae;g__Oscillibacter;s__Oscillibacter_ruminantium
OTU_182	12	288	0	4	0	9	6	115	k__Bacteria;p__Bacteroidota;c__Bacteroidia;o__Sphingobacteriales;f__env.OPS_17;g__env.OPS_17;s__	21	10	3	12	835	17	0	0	0	8	0	2	0	0	0	23	0	2	12	1	4	0	267	77	k__Bacteria;p__Bacteroidota;c__Bacteroidia;o__Sphingobacteriales;f__env.OPS_17;g__env.OPS_17;s__
OTU_183	1	0	79	0	0	10	279	23	k__Bacteria;p__Proteobacteria;c__Gammaproteobacteria;o__Diplorickettsiales;f__Diplorickettsiaceae;g__Aquicella;s__	0	1	0	0	0	0	58	115	62	0	0	0	0	0	0	0	0	28	138	373	326	0	20	47	k__Bacteria;p__Proteobacteria;c__Gammaproteobacteria;o__Diplorickettsiales;f__Diplorickettsiaceae;g__Aquicella;s__
OTU_184	2	1	81	0	0	5	271	31	k__Bacteria;p__Actinobacteriota;c__Actinobacteria;o__Frankiales;f__Sporichthyaceae;g__hgcI_clade;s__	0	4	0	2	0	0	34	165	43	0	0	0	0	0	0	0	0	15	143	517	151	0	27	65	k__Bacteria;p__Actinobacteriota;c__Actinobacteria;o__Frankiales;f__Sporichthyaceae;g__hgcI_clade;s__
OTU_185	162	1	121	125	5	0	1	1	k__Bacteria	92	56	338	0	0	1	37	53	273	257	94	22	10	5	0	0	0	0	0	0	3	0	0	1	k__Bacteria
OTU_186	136	31	32	31	154	30	4	55	k__Bacteria;p__Proteobacteria;c__Gammaproteobacteria;o__Pseudomonadales;f__Pseudomonadaceae;g__Pseudomonas	22	20	365	10	4	77	38	43	13	32	32	27	424	14	22	24	66	0	2	6	3	156	0	9	k__Bacteria;p__Proteobacteria;c__Gammaproteobacteria;o__Pseudomonadales;f__Pseudomonadaceae;g__Pseudomonas
OTU_187	1	0	62	1	1	5	196	14	k__Bacteria;p__Actinobacteriota;c__Acidimicrobiia	0	0	2	0	0	0	2	181	1	0	0	2	0	3	0	0	0	14	41	505	41	1	8	33	k__Bacteria;p__Actinobacteriota;c__Acidimicrobiia
OTU_188	4	4	24	1	5	1	86	11	k__Bacteria;p__Chloroflexi;c__Anaerolineae;o__SBR1031;f__A4b;g__A4b;s__	6	0	4	3	3	6	0	70	2	0	1	0	0	14	0	0	0	1	11	225	20	15	5	12	k__Bacteria;p__Chloroflexi;c__Anaerolineae;o__SBR1031;f__A4b;g__A4b;s__
OTU_189	5	3	59	18	21	59	100	50	k__Bacteria;p__Proteobacteria;c__Alphaproteobacteria;o__Caulobacterales;f__Caulobacteraceae;g__Caulobacter	9	3	1	6	2	0	106	36	33	20	20	13	14	15	33	33	31	111	200	25	75	96	26	28	k__Bacteria;p__Proteobacteria;c__Alphaproteobacteria;o__Caulobacterales;f__Caulobacteraceae;g__Caulobacter
OTU_190	0	2	35	1	1	8	229	20	k__Bacteria;p__Proteobacteria;c__Alphaproteobacteria;o__Caulobacterales;f__Hyphomonadaceae;g__SWB02;s__	0	0	0	4	2	0	0	2	101	0	2	0	0	0	1	0	0	24	37	23	626	17	19	23	k__Bacteria;p__Proteobacteria;c__Alphaproteobacteria;o__Caulobacterales;f__Hyphomonadaceae;g__SWB02;s__
OTU_191	0	223	0	0	1	395	0	0	k__Bacteria;p__Firmicutes;c__Limnochordia;o__M55-D21;f__M55-D21;g__M55-D21;s__	0	0	0	0	0	669	0	0	0	0	0	0	0	1	0	0	1184	0	0	0	0	0	0	0	k__Bacteria;p__Firmicutes;c__Limnochordia;o__M55-D21;f__M55-D21;g__M55-D21;s__
OTU_192	3	2	35	6	5	10	155	31	k__Bacteria;p__Proteobacteria;c__Alphaproteobacteria;o__Rhizobiales;f__Beijerinckiaceae;g__Methylobacterium-Methylorubrum;s__Methylorubrum_extorquens	8	0	1	4	1	1	9	8	86	7	9	2	4	2	8	2	2	25	39	21	404	14	39	38	k__Bacteria;p__Proteobacteria;c__Alphaproteobacteria;o__Rhizobiales;f__Beijerinckiaceae;g__Methylobacterium-Methylorubrum;s__Methylorubrum_extorquens
OTU_193	8	12	0	9	0	2	7	265	k__Bacteria;p__Deinococcota;c__Deinococci;o__Deinococcales;f__Deinococcaceae;g__Deinococcus;s__Deinococcus_misasensis	21	0	3	0	36	0	0	0	0	12	15	0	0	0	0	2	0	2	5	10	4	0	296	499	k__Bacteria;p__Deinococcota;c__Deinococci;o__Deinococcales;f__Deinococcaceae;g__Deinococcus;s__Deinococcus_misasensis
OTU_194	21	7	52	43	47	23	5	296	k__Bacteria;p__Proteobacteria;c__Gammaproteobacteria;o__Pseudomonadales;f__Moraxellaceae;g__Acinetobacter;s__Acinetobacter_baumannii	12	29	22	12	0	9	72	57	27	27	35	67	56	17	66	21	27	19	4	3	7	870	13	4	k__Bacteria;p__Proteobacteria;c__Gammaproteobacteria;o__Pseudomonadales;f__Moraxellaceae;g__Acinetobacter;s__Acinetobacter_baumannii
OTU_195	18	12	54	39	22	44	59	27	k__Bacteria;p__Proteobacteria;c__Gammaproteobacteria;o__Burkholderiales;f__Burkholderiaceae;g__Ralstonia;s__Ralstonia_pickettii	23	8	23	20	10	6	94	49	19	75	29	11	28	5	32	21	28	82	124	22	29	40	12	29	k__Bacteria;p__Proteobacteria;c__Gammaproteobacteria;o__Burkholderiales;f__Burkholderiaceae;g__Ralstonia;s__Ralstonia_pickettii
OTU_196	11	7	0	0	3	0	1	1	k__Bacteria;p__Patescibacteria;c__Saccharimonadia;o__Saccharimonadales;f__Saccharimonadales;g__Saccharimonadales;s__	11	16	6	4	2	15	0	0	0	0	0	0	0	9	0	0	0	0	0	0	1	0	0	1	k__Bacteria;p__Patescibacteria;c__Saccharimonadia;o__Saccharimonadales;f__Saccharimonadales;g__Saccharimonadales;s__
OTU_197	18	0	115	136	23	27	3	9	k__Bacteria;p__Firmicutes;c__Clostridia;o__Clostridia_UCG-014;f__Clostridia_UCG-014;g__Clostridia_UCG-014;s__	29	25	0	0	0	0	164	150	31	89	162	155	18	18	31	19	61	0	5	3	0	0	6	20	k__Bacteria;p__Firmicutes;c__Clostridia;o__Clostridia_UCG-014;f__Clostridia_UCG-014;g__Clostridia_UCG-014;s__
OTU_198	1	0	3	0	0	1	243	4	k__Bacteria;p__Planctomycetota;c__Phycisphaerae;o__Phycisphaerales;f__Phycisphaeraceae;g__SM1A02;s__	0	0	1	0	0	0	0	0	9	0	0	0	0	0	0	0	0	1	4	3	720	0	3	7	k__Bacteria;p__Planctomycetota;c__Phycisphaerae;o__Phycisphaerales;f__Phycisphaeraceae;g__SM1A02;s__
OTU_199	31	28	4	1	3	5	36	19	k__Bacteria;p__Bacteroidota;c__Bacteroidia;o__Chitinophagales;f__Chitinophagaceae;g__Edaphobaculum;s__	48	26	17	24	33	26	11	0	0	0	1	0	0	5	2	3	2	8	61	12	33	1	11	44	k__Bacteria;p__Bacteroidota;c__Bacteroidia;o__Chitinophagales;f__Chitinophagaceae;g__Edaphobaculum;s__
OTU_200	0	0	0	573	0	0	0	0	k__Bacteria;p__Proteobacteria;c__Gammaproteobacteria;o__Burkholderiales;f__Sutterellaceae;g__Sutterella;s__	0	0	0	0	0	0	0	0	0	1719	0	0	0	0	0	0	0	0	0	0	0	0	0	0	k__Bacteria;p__Proteobacteria;c__Gammaproteobacteria;o__Burkholderiales;f__Sutterellaceae;g__Sutterella;s__
OTU_201	9	14	121	4	13	28	227	113	k__Bacteria;p__Proteobacteria;c__Alphaproteobacteria;o__Rhizobiales;f__Kaistiaceae;g__Kaistia	12	14	1	31	4	5	228	90	45	6	6	0	13	2	23	9	9	65	371	159	151	241	24	74	k__Bacteria;p__Proteobacteria;c__Alphaproteobacteria;o__Rhizobiales;f__Kaistiaceae;g__Kaistia
OTU_202	219	155	2	2	0	5	13	2	k__Bacteria;p__Bacteroidota;c__Bacteroidia;o__Flavobacteriales;f__Flavobacteriaceae;g__Flavobacterium;s__Bacteroides_sp.	30	605	21	19	5	439	2	0	4	0	0	5	0	0	0	0	12	1	14	1	24	0	3	3	k__Bacteria;p__Bacteroidota;c__Bacteroidia;o__Flavobacteriales;f__Flavobacteriaceae;g__Flavobacterium;s__Bacteroides_sp.
OTU_203	5	10	63	2	3	10	166	41	k__Bacteria;p__Proteobacteria;c__Alphaproteobacteria;o__Rhizobiales;f__Rhizobiaceae;g__Mesorhizobium	7	3	4	4	19	5	156	25	6	5	1	0	3	1	5	3	0	26	401	46	49	23	48	52	k__Bacteria;p__Proteobacteria;c__Alphaproteobacteria;o__Rhizobiales;f__Rhizobiaceae;g__Mesorhizobium
OTU_204	0	0	46	0	0	5	207	15	k__Bacteria;p__Proteobacteria;c__Gammaproteobacteria;o__Burkholderiales;f__B1-7BS;g__B1-7BS;s__	0	0	0	0	0	0	108	28	1	0	0	0	0	0	0	0	0	13	519	75	27	0	10	35	k__Bacteria;p__Proteobacteria;c__Gammaproteobacteria;o__Burkholderiales;f__B1-7BS;g__B1-7BS;s__
OTU_205	53	4	17	1	0	4	188	9	k__Bacteria;p__Cyanobacteria;c__Cyanobacteriia;o__Chloroplast;f__Chloroplast;g__Chloroplast;s__Tetradesmus_obliquus	110	37	12	3	3	4	39	1	9	0	2	0	0	0	0	0	0	11	418	9	137	0	8	19	k__Bacteria;p__Cyanobacteria;c__Cyanobacteriia;o__Chloroplast;f__Chloroplast;g__Chloroplast;s__Tetradesmus_obliquus
OTU_206	13	11	13	6	11	9	16	13	k__Bacteria;p__Proteobacteria;c__Alphaproteobacteria;o__Caulobacterales;f__Caulobacteraceae;g__Brevundimonas	21	9	8	7	12	13	11	9	18	8	8	1	7	19	7	8	5	13	4	0	42	2	23	12	k__Bacteria;p__Proteobacteria;c__Alphaproteobacteria;o__Caulobacterales;f__Caulobacteraceae;g__Brevundimonas
OTU_207	0	0	34	0	0	6	209	19	k__Bacteria	0	0	0	0	0	0	0	0	101	0	0	0	0	0	0	0	0	18	36	17	574	0	18	38	k__Bacteria
OTU_208	260	1	6	176	2	3	4	1	k__Bacteria;p__Proteobacteria;c__Gammaproteobacteria;o__Pseudomonadales;f__Pseudomonadaceae;g__Pseudomonas;s__Pseudomonas_formosensis	1	778	0	1	0	1	16	0	0	0	0	527	0	2	2	0	8	0	10	1	0	0	0	1	k__Bacteria;p__Proteobacteria;c__Gammaproteobacteria;o__Pseudomonadales;f__Pseudomonadaceae;g__Pseudomonas;s__Pseudomonas_formosensis
OTU_209	4	0	43	230	28	23	0	24	k__Bacteria;p__Firmicutes;c__Clostridia;o__Oscillospirales;f__Ruminococcaceae;g__Subdoligranulum;s__	0	0	12	0	0	0	51	44	32	645	33	10	39	22	21	17	51	0	0	0	0	1	69	1	k__Bacteria;p__Firmicutes;c__Clostridia;o__Oscillospirales;f__Ruminococcaceae;g__Subdoligranulum;s__
OTU_210	2	5	45	2	2	6	181	69	k__Bacteria;p__Proteobacteria;c__Alphaproteobacteria;o__;f__;g__	3	0	2	12	0	2	53	2	79	3	1	0	0	1	3	0	0	16	167	37	337	118	42	45	k__Bacteria;p__Proteobacteria;c__Alphaproteobacteria;o__;f__;g__
OTU_211	41	9	49	4	2	7	105	33	k__Bacteria;p__Proteobacteria;c__Alphaproteobacteria;o__Sphingomonadales;f__Sphingomonadaceae	61	46	15	12	5	9	97	35	14	0	9	2	2	2	0	0	1	18	210	47	58	3	17	77	k__Bacteria;p__Proteobacteria;c__Alphaproteobacteria;o__Sphingomonadales;f__Sphingomonadaceae
OTU_212	0	0	123	0	0	0	64	0	k__Bacteria;p__Firmicutes;c__Clostridia;o__Clostridia;f__Hungateiclostridiaceae;g__;s__	0	0	0	0	0	0	369	0	0	0	0	0	0	0	0	0	0	0	190	0	0	0	0	0	k__Bacteria;p__Firmicutes;c__Clostridia;o__Clostridia;f__Hungateiclostridiaceae;g__;s__
OTU_213	22	18	11	2	41	23	3	1	k__Bacteria;p__Desulfobacterota;c__Desulfuromonadia;o__Geobacterales;f__Geobacteraceae;g__Geobacter	28	22	14	11	17	26	22	7	3	1	3	0	3	113	6	1	68	0	7	0	0	0	1	0	k__Bacteria;p__Desulfobacterota;c__Desulfuromonadia;o__Geobacterales;f__Geobacteraceae;g__Geobacter
OTU_214	2	107	0	0	109	212	0	0	Unknown	0	0	6	64	176	80	0	0	0	0	0	0	92	57	177	86	200	350	0	0	0	0	0	0	Unknown
OTU_215	16	95	0	9	0	156	1	0	k__Bacteria;p__Proteobacteria;c__Gammaproteobacteria;o__Pseudomonadales;f__Pseudomonadaceae;g__Thiopseudomonas;s__	3	43	0	0	0	283	0	0	0	0	0	27	0	0	0	0	466	0	0	0	1	0	0	0	k__Bacteria;p__Proteobacteria;c__Gammaproteobacteria;o__Pseudomonadales;f__Pseudomonadaceae;g__Thiopseudomonas;s__
OTU_216	7	1	1	4	1	3	12	225	k__Bacteria;p__Proteobacteria;c__Gammaproteobacteria;o__Steroidobacterales;f__Steroidobacteraceae;g__	18	1	1	0	0	3	2	0	1	1	9	1	0	2	0	0	1	7	20	5	9	574	11	89	k__Bacteria;p__Proteobacteria;c__Gammaproteobacteria;o__Steroidobacterales;f__Steroidobacteraceae;g__
OTU_217	0	0	5	0	0	0	243	5	k__Bacteria;p__Verrucomicrobiota;c__Verrucomicrobiae;o__Pedosphaerales;f__Pedosphaeraceae;g__Pedosphaeraceae;s__	0	0	0	0	0	0	0	0	15	0	0	0	0	0	0	0	0	0	10	5	714	0	0	13	k__Bacteria;p__Verrucomicrobiota;c__Verrucomicrobiae;o__Pedosphaerales;f__Pedosphaeraceae;g__Pedosphaeraceae;s__
OTU_218	273	16	1	7	3	6	20	28	k__Bacteria;p__Proteobacteria;c__Gammaproteobacteria;o__Burkholderiales;f__Comamonadaceae;g__Curvibacter;s__	613	186	20	11	18	18	3	0	0	0	12	7	9	0	0	0	0	17	60	0	0	59	1	22	k__Bacteria;p__Proteobacteria;c__Gammaproteobacteria;o__Burkholderiales;f__Comamonadaceae;g__Curvibacter;s__
OTU_219	7	88	0	3	0	7	7	225	k__Bacteria;p__Bacteroidota;c__Bacteroidia;o__Cytophagales;f__Spirosomaceae;g__Rudanella	14	1	4	6	249	8	0	0	0	8	1	0	0	0	0	18	0	2	14	2	4	0	523	152	k__Bacteria;p__Bacteroidota;c__Bacteroidia;o__Cytophagales;f__Spirosomaceae;g__Rudanella
OTU_220	7	0	71	360	39	30	0	37	k__Bacteria;p__Firmicutes;c__Clostridia;o__Oscillospirales;f__Ruminococcaceae;g__Subdoligranulum;s__	9	0	10	0	0	0	87	80	45	996	57	27	55	16	44	23	66	0	0	0	0	3	95	13	k__Bacteria;p__Firmicutes;c__Clostridia;o__Oscillospirales;f__Ruminococcaceae;g__Subdoligranulum;s__
OTU_221	1	0	0	259	1	0	0	0	k__Bacteria;p__Firmicutes;c__Clostridia;o__Lachnospirales;f__Lachnospiraceae;g__;s__bacterium_enrichment	0	0	1	0	0	0	0	0	0	776	0	0	0	1	0	0	0	0	0	0	0	0	0	0	k__Bacteria;p__Firmicutes;c__Clostridia;o__Lachnospirales;f__Lachnospiraceae;g__;s__bacterium_enrichment
OTU_222	3	1	8	270	9	3	0	6	k__Bacteria;p__Firmicutes;c__Clostridia;o__Lachnospirales;f__Lachnospiraceae;g__Lachnoclostridium;s__	0	1	8	0	0	2	9	7	7	805	4	0	23	2	2	2	6	0	0	0	0	0	17	1	k__Bacteria;p__Firmicutes;c__Clostridia;o__Lachnospirales;f__Lachnospiraceae;g__Lachnoclostridium;s__
OTU_223	3	1	44	2	0	6	166	10	k__Bacteria;p__Proteobacteria;c__Alphaproteobacteria;o__Acetobacterales;f__Acetobacteraceae	5	4	0	0	2	1	53	79	0	2	0	2	0	0	0	0	0	16	130	347	20	2	11	16	k__Bacteria;p__Proteobacteria;c__Alphaproteobacteria;o__Acetobacterales;f__Acetobacteraceae
OTU_224	6	13	1	5	4	3	4	216	k__Bacteria;p__Proteobacteria;c__Alphaproteobacteria;o__Rhizobiales;f__Pleomorphomonadaceae;g__Chthonobacter;s__	10	2	6	20	15	4	0	0	2	10	3	0	0	0	12	6	0	2	1	1	9	567	62	19	k__Bacteria;p__Proteobacteria;c__Alphaproteobacteria;o__Rhizobiales;f__Pleomorphomonadaceae;g__Chthonobacter;s__
OTU_225	1	5	1	7	1	1	12	236	k__Bacteria;p__Planctomycetota;c__Planctomycetes;o__Gemmatales;f__Gemmataceae;g__;s__	2	0	0	0	14	1	3	0	0	17	4	0	1	0	0	1	0	1	8	10	16	0	486	221	k__Bacteria;p__Planctomycetota;c__Planctomycetes;o__Gemmatales;f__Gemmataceae;g__;s__
OTU_226	86	29	2	24	8	0	7	3	k__Bacteria;p__Proteobacteria;c__Gammaproteobacteria;o__Burkholderiales;f__Comamonadaceae	88	123	45	69	6	11	1	2	1	62	1	8	2	15	5	0	0	0	5	10	4	3	0	4	k__Bacteria;p__Proteobacteria;c__Gammaproteobacteria;o__Burkholderiales;f__Comamonadaceae
OTU_227	0	0	23	1	0	3	233	11	k__Bacteria;p__Planctomycetota;c__OM190;o__OM190;f__OM190;g__OM190;s__	0	0	0	0	0	0	46	21	0	1	0	0	0	0	0	0	0	8	509	153	35	0	13	18	k__Bacteria;p__Planctomycetota;c__OM190;o__OM190;f__OM190;g__OM190;s__
OTU_228	0	0	0	287	0	0	0	0	k__Bacteria;p__Proteobacteria;c__Gammaproteobacteria;o__Burkholderiales;f__Alcaligenaceae;g__Parapusillimonas	0	0	0	0	0	0	0	0	0	861	0	0	0	0	0	0	0	0	0	0	0	0	0	0	k__Bacteria;p__Proteobacteria;c__Gammaproteobacteria;o__Burkholderiales;f__Alcaligenaceae;g__Parapusillimonas
OTU_229	13	22	0	9	1	7	13	151	k__Bacteria;p__Proteobacteria;c__Alphaproteobacteria;o__Rhodobacterales;f__Rhodobacteraceae;g__Roseobacter_clade_CHAB-I-5_lineage;s__	33	5	1	1	0	63	0	0	0	1	25	1	1	0	0	0	9	12	16	6	17	0	32	419	k__Bacteria;p__Proteobacteria;c__Alphaproteobacteria;o__Rhodobacterales;f__Rhodobacteraceae;g__Roseobacter_clade_CHAB-I-5_lineage;s__
OTU_230	1	0	25	303	10	8	0	9	k__Bacteria;p__Firmicutes;c__Bacilli;o__Erysipelotrichales;f__Erysipelatoclostridiaceae;g__Erysipelotrichaceae_UCG-003;s__	3	0	0	0	0	0	35	26	14	853	28	26	12	9	8	2	22	0	0	0	0	0	23	2	k__Bacteria;p__Firmicutes;c__Bacilli;o__Erysipelotrichales;f__Erysipelatoclostridiaceae;g__Erysipelotrichaceae_UCG-003;s__
OTU_231	182	27	31	9	3	5	78	17	k__Bacteria;p__Actinobacteriota;c__Actinobacteria;o__Corynebacteriales;f__Nocardiaceae;g__Gordonia	226	286	33	43	10	27	10	76	5	1	16	8	4	0	5	1	3	10	20	199	13	2	10	38	k__Bacteria;p__Actinobacteriota;c__Actinobacteria;o__Corynebacteriales;f__Nocardiaceae;g__Gordonia
OTU_232	100	282	0	1	9	44	1	3	k__Bacteria;p__Proteobacteria;c__Gammaproteobacteria;o__Burkholderiales;f__Chromobacteriaceae;g__Vogesella;s__	110	104	86	102	542	201	0	0	0	0	0	2	8	0	18	98	34	0	0	0	1	6	0	3	k__Bacteria;p__Proteobacteria;c__Gammaproteobacteria;o__Burkholderiales;f__Chromobacteriaceae;g__Vogesella;s__
OTU_233	21	63	16	10	0	22	89	54	k__Bacteria;p__Proteobacteria;c__Alphaproteobacteria;o__Acetobacterales;f__Acetobacteraceae;g__Roseococcus;s__	30	26	7	7	141	41	1	47	0	20	5	3	0	0	0	52	4	8	31	223	13	3	120	39	k__Bacteria;p__Proteobacteria;c__Alphaproteobacteria;o__Acetobacterales;f__Acetobacteraceae;g__Roseococcus;s__
OTU_234	3	1	6	19	1	5	35	113	k__Bacteria;p__Proteobacteria;c__Alphaproteobacteria;o__Rhizobiales;f__Rhizobiales_Incertae_Sedis;g__Alsobacter;s__	6	0	2	2	0	0	0	0	17	51	5	0	1	0	0	1	0	14	26	10	69	84	198	56	k__Bacteria;p__Proteobacteria;c__Alphaproteobacteria;o__Rhizobiales;f__Rhizobiales_Incertae_Sedis;g__Alsobacter;s__
OTU_235	231	23	1	7	0	1	1	8	k__Bacteria;p__Proteobacteria;c__Gammaproteobacteria;o__Burkholderiales;f__Comamonadaceae	456	226	11	38	7	22	0	1	0	0	14	7	0	0	0	0	2	0	3	0	0	0	0	24	k__Bacteria;p__Proteobacteria;c__Gammaproteobacteria;o__Burkholderiales;f__Comamonadaceae
OTU_236	136	2	90	1	1	0	2	0	k__Bacteria	1	297	109	0	0	5	0	10	259	0	0	2	2	0	0	0	0	0	0	0	5	0	0	0	k__Bacteria
OTU_237	1	4	0	0	2	0	1	269	k__Bacteria;p__Bacteroidota;c__Bacteroidia;o__Cytophagales;f__Microscillaceae;g__Ohtaekwangia;s__	0	0	1	11	0	0	0	0	0	0	0	0	0	0	4	0	0	0	0	0	1	803	2	1	k__Bacteria;p__Bacteroidota;c__Bacteroidia;o__Cytophagales;f__Microscillaceae;g__Ohtaekwangia;s__
OTU_238	0	0	38	1	0	7	126	19	k__Bacteria;p__Proteobacteria;c__Alphaproteobacteria;o__Rhizobiales;f__Hyphomicrobiaceae;g__Hyphomicrobium;s__	0	0	0	0	0	0	113	0	0	0	1	0	0	0	0	0	0	21	332	18	28	7	19	30	k__Bacteria;p__Proteobacteria;c__Alphaproteobacteria;o__Rhizobiales;f__Hyphomicrobiaceae;g__Hyphomicrobium;s__
OTU_239	0	0	44	0	0	5	160	6	k__Bacteria;p__Bdellovibrionota;c__Bdellovibrionia;o__Bdellovibrionales;f__Bdellovibrionaceae;g__Bdellovibrio;s__	0	0	0	0	0	0	0	131	0	0	0	0	0	0	0	0	0	13	11	438	31	0	6	11	k__Bacteria;p__Bdellovibrionota;c__Bdellovibrionia;o__Bdellovibrionales;f__Bdellovibrionaceae;g__Bdellovibrio;s__
OTU_240	1	20	18	1	0	2	226	5	k__Bacteria;p__Verrucomicrobiota;c__Verrucomicrobiae;o__Verrucomicrobiales;f__Verrucomicrobiaceae;g__Prosthecobacter;s__	3	0	0	0	58	0	29	21	2	1	0	0	0	0	0	4	0	0	410	218	49	2	5	6	k__Bacteria;p__Verrucomicrobiota;c__Verrucomicrobiae;o__Verrucomicrobiales;f__Verrucomicrobiaceae;g__Prosthecobacter;s__
OTU_241	24	163	2	20	0	363	0	1	k__Bacteria;p__Firmicutes;c__Clostridia;o__Lachnospirales;f__Lachnospiraceae;g__Herbinix;s__	0	70	0	0	0	488	2	1	1	0	0	59	0	0	0	0	1089	0	0	0	0	0	0	1	k__Bacteria;p__Firmicutes;c__Clostridia;o__Lachnospirales;f__Lachnospiraceae;g__Herbinix;s__
OTU_242	13	14	12421	124	950	133	112	24	k__Bacteria;p__Proteobacteria;c__Gammaproteobacteria;o__Aeromonadales;f__Aeromonadaceae;g__Aeromonas	28	4	6	28	10	4	230	187	36844	97	141	134	148	2476	224	193	205	1	6	1	327	25	36	10	k__Bacteria;p__Proteobacteria;c__Gammaproteobacteria;o__Aeromonadales;f__Aeromonadaceae;g__Aeromonas
OTU_243	0	0	11	0	0	2	267	4	k__Bacteria;p__Bacteroidota;c__Bacteroidia;o__Sphingobacteriales;f__env.OPS_17;g__env.OPS_17;s__	0	0	0	0	0	0	0	32	0	0	0	0	0	0	0	0	0	5	8	785	8	0	7	5	k__Bacteria;p__Bacteroidota;c__Bacteroidia;o__Sphingobacteriales;f__env.OPS_17;g__env.OPS_17;s__
OTU_244	29	58	42	19	91	41	32	84	k__Bacteria;p__Proteobacteria;c__Gammaproteobacteria;o__Pseudomonadales;f__Pseudomonadaceae;g__Pseudomonas;s__Pseudomonas_otitidis	44	19	23	37	118	19	49	41	35	18	21	18	20	213	39	76	28	18	25	9	60	195	27	28	k__Bacteria;p__Proteobacteria;c__Gammaproteobacteria;o__Pseudomonadales;f__Pseudomonadaceae;g__Pseudomonas;s__Pseudomonas_otitidis
OTU_245	0	1	68	0	1	4	130	25	k__Bacteria;p__Proteobacteria;c__Gammaproteobacteria;o__Burkholderiales;f__Nitrosomonadaceae;g__Nitrosomonas;s__Nitrosomonas_sp.	0	0	0	3	0	0	118	63	22	0	0	0	0	0	1	0	0	10	193	116	80	15	25	34	k__Bacteria;p__Proteobacteria;c__Gammaproteobacteria;o__Burkholderiales;f__Nitrosomonadaceae;g__Nitrosomonas;s__Nitrosomonas_sp.
OTU_246	5	4	1	5	1	1	8	212	k__Bacteria;p__Chloroflexi;c__Chloroflexia;o__Chloroflexales;f__Roseiflexaceae	10	1	3	2	3	5	0	0	1	2	13	0	2	0	1	0	1	1	6	4	14	31	121	482	k__Bacteria;p__Chloroflexi;c__Chloroflexia;o__Chloroflexales;f__Roseiflexaceae
OTU_247	1	32	13	0	0	2	219	4	k__Bacteria;p__Bacteroidota;c__Bacteroidia;o__Sphingobacteriales;f__env.OPS_17;g__env.OPS_17;s__	3	0	0	93	0	3	36	0	1	0	0	0	0	0	0	0	0	4	648	6	3	0	5	7	k__Bacteria;p__Bacteroidota;c__Bacteroidia;o__Sphingobacteriales;f__env.OPS_17;g__env.OPS_17;s__
OTU_248	0	3	0	0	0	0	0	257	k__Bacteria;p__Bacteroidota;c__Bacteroidia;o__Cytophagales;f__Microscillaceae;g__Ohtaekwangia;s__	0	0	0	5	1	1	0	0	0	0	0	0	0	0	0	0	0	0	0	0	0	770	0	0	k__Bacteria;p__Bacteroidota;c__Bacteroidia;o__Cytophagales;f__Microscillaceae;g__Ohtaekwangia;s__
OTU_249	8	1	49	6	2	7	173	66	k__Bacteria;p__Actinobacteriota;c__Acidimicrobiia;o__Microtrichales	21	2	0	1	0	0	40	101	6	2	15	0	2	2	0	1	2	16	151	319	49	40	35	122	k__Bacteria;p__Actinobacteriota;c__Acidimicrobiia;o__Microtrichales
OTU_250	133	25	7	12	2	1	30	9	k__Bacteria;p__Proteobacteria;c__Alphaproteobacteria;o__Acetobacterales;f__Acetobacteraceae	175	177	45	16	27	30	0	18	1	0	20	16	6	0	0	0	0	2	5	70	14	0	3	22	k__Bacteria;p__Proteobacteria;c__Alphaproteobacteria;o__Acetobacterales;f__Acetobacteraceae
OTU_251	11	0	87	231	9	8	2	4	k__Bacteria;p__Proteobacteria;c__Gammaproteobacteria;o__Enterobacterales;f__Morganellaceae;g__Providencia;s__Providencia_sp.	22	10	0	0	0	0	97	156	8	407	149	137	7	6	13	10	12	0	3	2	0	0	0	12	k__Bacteria;p__Proteobacteria;c__Gammaproteobacteria;o__Enterobacterales;f__Morganellaceae;g__Providencia;s__Providencia_sp.
OTU_252	0	0	51	0	1	5	104	14	k__Bacteria;p__Proteobacteria;c__Alphaproteobacteria;o__Rickettsiales;f__Rickettsiaceae;g__Candidatus_Megaira;s__	0	0	0	0	0	0	0	151	1	0	0	0	1	0	1	0	0	14	24	265	23	1	19	20	k__Bacteria;p__Proteobacteria;c__Alphaproteobacteria;o__Rickettsiales;f__Rickettsiaceae;g__Candidatus_Megaira;s__
OTU_253	4	3	21	5	3	13	72	40	k__Bacteria;p__Proteobacteria;c__Alphaproteobacteria;o__Sphingomonadales;f__Sphingomonadaceae;g__Sphingobium;s__Sphingobium_yanoikuyae	5	4	1	0	8	1	11	11	39	7	2	5	4	2	1	6	4	28	24	22	170	29	48	41	k__Bacteria;p__Proteobacteria;c__Alphaproteobacteria;o__Sphingomonadales;f__Sphingomonadaceae;g__Sphingobium;s__Sphingobium_yanoikuyae
OTU_254	1	1	54	0	0	3	201	24	k__Bacteria;p__Acidobacteriota;c__Acidobacteriae;o__Bryobacterales;f__Bryobacteraceae;g__Bryobacter;s__	1	0	0	1	0	0	68	82	10	0	0	0	0	0	0	0	0	8	254	273	75	5	18	47	k__Bacteria;p__Acidobacteriota;c__Acidobacteriae;o__Bryobacterales;f__Bryobacteraceae;g__Bryobacter;s__
OTU_255	12	11	6	2	12	3	22	26	k__Bacteria;p__Proteobacteria;c__Gammaproteobacteria;o__Cellvibrionales;f__Halieaceae;g__OM60(NOR5)_clade;s__	27	4	5	6	8	17	0	0	16	2	3	0	3	31	0	0	3	5	4	1	61	32	7	38	k__Bacteria;p__Proteobacteria;c__Gammaproteobacteria;o__Cellvibrionales;f__Halieaceae;g__OM60(NOR5)_clade;s__
OTU_256	21	5	40	132	47	24	6	13	k__Bacteria;p__Firmicutes;c__Clostridia;o__Peptostreptococcales-Tissierellales;f__Peptostreptococcaceae;g__Romboutsia;s__Romboutsia_ilealis	13	13	35	7	3	5	43	54	21	339	32	25	93	18	29	21	18	32	9	7	1	15	12	11	k__Bacteria;p__Firmicutes;c__Clostridia;o__Peptostreptococcales-Tissierellales;f__Peptostreptococcaceae;g__Romboutsia;s__Romboutsia_ilealis
OTU_257	13	116	0	0	7	0	0	57	k__Bacteria;p__Cyanobacteria;c__Cyanobacteriia;o__Chloroplast;f__Chloroplast;g__Chloroplast;s__Tetradesmus_obliquus	15	12	10	337	1	8	0	0	0	0	0	0	0	0	21	0	0	0	0	0	0	169	0	0	k__Bacteria;p__Cyanobacteria;c__Cyanobacteriia;o__Chloroplast;f__Chloroplast;g__Chloroplast;s__Tetradesmus_obliquus
OTU_258	29	13	2	17	1	6	22	130	k__Bacteria;p__Proteobacteria;c__Gammaproteobacteria;o__Xanthomonadales;f__Xanthomonadaceae;g__Lysobacter	75	2	9	0	18	20	2	1	2	9	39	2	1	0	0	1	4	12	26	10	30	1	63	326	k__Bacteria;p__Proteobacteria;c__Gammaproteobacteria;o__Xanthomonadales;f__Xanthomonadaceae;g__Lysobacter
OTU_259	3	8	186	2	0	14	80	1	k__Bacteria;p__Synergistota;c__Synergistia;o__Synergistales;f__Synergistaceae;g__Thermovirga;s__	0	7	0	0	0	24	556	2	0	0	1	4	0	0	0	0	42	0	238	0	0	0	0	2	k__Bacteria;p__Synergistota;c__Synergistia;o__Synergistales;f__Synergistaceae;g__Thermovirga;s__
OTU_260	44	104	29	29	16	51	36	567	k__Bacteria;p__Proteobacteria;c__Alphaproteobacteria;o__Rhodobacterales;f__Rhodobacteraceae;g__Rhodobacter;s__Rhodobacter_sphaeroides	114	10	8	7	5	300	42	30	14	16	63	7	19	11	18	9	63	81	39	23	44	47	120	1533	k__Bacteria;p__Proteobacteria;c__Alphaproteobacteria;o__Rhodobacterales;f__Rhodobacteraceae;g__Rhodobacter;s__Rhodobacter_sphaeroides
OTU_261	4	30	0	2	175	181	0	1	k__Bacteria	0	0	11	15	12	63	0	0	0	0	3	1	289	76	159	64	459	20	0	0	0	0	0	2	k__Bacteria
OTU_262	0	0	32	0	0	3	403	12	k__Bacteria;p__Planctomycetota;c__Planctomycetes;o__Pirellulales;f__Pirellulaceae;g__;s__	0	0	0	0	0	0	2	93	0	0	0	0	0	0	0	0	0	7	31	1162	15	1	5	29	k__Bacteria;p__Planctomycetota;c__Planctomycetes;o__Pirellulales;f__Pirellulaceae;g__;s__
OTU_263	0	0	7	2	0	0	158	2	k__Bacteria;p__Planctomycetota;c__Phycisphaerae;o__Phycisphaerales;f__Phycisphaeraceae;g__SM1A02;s__	0	0	0	0	0	0	0	0	20	0	0	4	0	0	0	0	0	0	3	3	466	0	3	3	k__Bacteria;p__Planctomycetota;c__Phycisphaerae;o__Phycisphaerales;f__Phycisphaeraceae;g__SM1A02;s__
OTU_264	36	0	15	57	42	5	3	6	k__Bacteria;p__Actinobacteriota;c__Actinobacteria;o__Propionibacteriales;f__Propionibacteriaceae;g__Cutibacterium;s__Cutibacterium_acnes	19	6	82	0	0	0	15	23	5	135	19	15	117	1	7	1	12	0	4	3	0	2	2	14	k__Bacteria;p__Actinobacteriota;c__Actinobacteria;o__Propionibacteriales;f__Propionibacteriaceae;g__Cutibacterium;s__Cutibacterium_acnes
OTU_265	0	0	47	226	21	19	0	31	k__Bacteria;p__Firmicutes;c__Clostridia;o__Lachnospirales;f__Lachnospiraceae;g__Anaerostipes;s__Anaerostipes_hadrus	0	0	0	0	0	0	61	48	30	615	36	25	23	13	25	16	37	2	0	0	0	1	88	4	k__Bacteria;p__Firmicutes;c__Clostridia;o__Lachnospirales;f__Lachnospiraceae;g__Anaerostipes;s__Anaerostipes_hadrus
OTU_266	79	12	165	7	3	2	3	5	k__Bacteria;p__Proteobacteria;c__Gammaproteobacteria;o__Enterobacterales;f__Yersiniaceae;g__Rahnella1;s__Rahnella_aquatilis	110	56	70	13	14	8	5	1	489	0	12	9	4	0	4	2	2	0	0	3	6	0	1	14	k__Bacteria;p__Proteobacteria;c__Gammaproteobacteria;o__Enterobacterales;f__Yersiniaceae;g__Rahnella1;s__Rahnella_aquatilis
OTU_267	0	0	0	161	0	0	0	0	k__Bacteria;p__Firmicutes;c__Clostridia;o__Clostridiales;f__Clostridiaceae;g__Clostridium_sensu_stricto_2;s__	0	0	0	0	0	0	0	0	0	482	0	0	0	0	0	0	0	0	0	0	0	0	0	0	k__Bacteria;p__Firmicutes;c__Clostridia;o__Clostridiales;f__Clostridiaceae;g__Clostridium_sensu_stricto_2;s__
OTU_268	15	15	7	6	1	6	120	91	k__Bacteria;p__Bacteroidota;c__Bacteroidia;o__Chitinophagales;f__Chitinophagaceae;g__Sediminibacterium;s__	21	13	10	9	9	27	2	13	6	5	11	0	1	0	1	1	3	12	57	81	221	28	65	179	k__Bacteria;p__Bacteroidota;c__Bacteroidia;o__Chitinophagales;f__Chitinophagaceae;g__Sediminibacterium;s__
OTU_269	3	9	9	1	1	1	245	11	k__Bacteria;p__Bacteroidota;c__Bacteroidia;o__Sphingobacteriales;f__NS11-12_marine_group;g__NS11-12_marine_group;s__	3	2	4	25	0	2	0	0	26	0	1	0	0	0	1	0	0	3	28	2	704	15	2	15	k__Bacteria;p__Bacteroidota;c__Bacteroidia;o__Sphingobacteriales;f__NS11-12_marine_group;g__NS11-12_marine_group;s__
OTU_270	0	2	57	1	1	9	414	40	k__Bacteria;p__Acidobacteriota;c__Acidobacteriae;o__Bryobacterales;f__Bryobacteraceae;g__Bryobacter	0	0	0	4	0	0	75	11	85	0	2	0	0	0	1	0	0	26	419	79	742	40	34	44	k__Bacteria;p__Acidobacteriota;c__Acidobacteriae;o__Bryobacterales;f__Bryobacteraceae;g__Bryobacter
OTU_271	11	22	5	18	1	5	37	165	k__Bacteria;p__Proteobacteria;c__Alphaproteobacteria;o__Rhodobacterales;f__Rhodobacteraceae;g__Tropicimonas;s__	17	4	11	4	58	4	1	0	12	49	4	0	2	0	0	7	0	8	18	11	81	0	409	86	k__Bacteria;p__Proteobacteria;c__Alphaproteobacteria;o__Rhodobacterales;f__Rhodobacteraceae;g__Tropicimonas;s__
OTU_272	12	2	20	12	10	24	8	66	k__Bacteria;p__Proteobacteria;c__Alphaproteobacteria;o__Sphingomonadales;f__Sphingomonadaceae;g__Altererythrobacter	25	4	5	2	1	2	29	15	15	10	23	2	14	7	7	10	14	48	9	5	8	48	16	132	k__Bacteria;p__Proteobacteria;c__Alphaproteobacteria;o__Sphingomonadales;f__Sphingomonadaceae;g__Altererythrobacter
OTU_273	2	2	0	3	0	3	33	129	k__Bacteria;p__Planctomycetota;c__Planctomycetes;o__Gemmatales;f__Gemmataceae;g__Fimbriiglobus;s__	3	1	0	2	3	0	0	0	0	6	2	0	0	0	0	2	0	6	14	67	18	1	306	80	k__Bacteria;p__Planctomycetota;c__Planctomycetes;o__Gemmatales;f__Gemmataceae;g__Fimbriiglobus;s__
OTU_274	23	4	1	13	4	6	20	129	k__Bacteria;p__Proteobacteria;c__Gammaproteobacteria;o__Xanthomonadales;f__Xanthomonadaceae;g__Arenimonas;s__	54	5	8	1	0	10	1	0	2	8	27	3	7	4	0	0	5	12	21	20	17	51	30	304	k__Bacteria;p__Proteobacteria;c__Gammaproteobacteria;o__Xanthomonadales;f__Xanthomonadaceae;g__Arenimonas;s__
OTU_275	1	0	10	1	0	1	190	6	k__Bacteria;p__Planctomycetota;c__Planctomycetes;o__Gemmatales;f__Gemmataceae;g__;s__	0	1	0	0	0	0	2	23	5	0	0	1	0	0	0	0	0	2	12	378	179	2	3	13	k__Bacteria;p__Planctomycetota;c__Planctomycetes;o__Gemmatales;f__Gemmataceae;g__;s__
OTU_276	26	31	0	13	0	15	16	88	k__Bacteria;p__Proteobacteria;c__Gammaproteobacteria;o__Gammaproteobacteria_Incertae_Sedis;f__Unknown_Family;g__Unknown_Family;s__	69	1	8	7	4	81	0	0	0	5	34	0	0	0	0	0	32	12	13	13	20	3	31	230	k__Bacteria;p__Proteobacteria;c__Gammaproteobacteria;o__Gammaproteobacteria_Incertae_Sedis;f__Unknown_Family;g__Unknown_Family;s__
OTU_277	39	1	7	1	0	2	128	5	k__Bacteria;p__Bacteroidota;c__Bacteroidia;o__Chitinophagales;f__Chitinophagaceae;g__Sediminibacterium;s__	21	87	9	1	2	0	13	7	0	0	0	2	0	0	0	0	0	6	222	140	21	1	5	8	k__Bacteria;p__Bacteroidota;c__Bacteroidia;o__Chitinophagales;f__Chitinophagaceae;g__Sediminibacterium;s__
OTU_278	0	0	12	0	1	1	210	8	k__Bacteria;p__Planctomycetota;c__Planctomycetes;o__Pirellulales;f__Pirellulaceae;g__;s__	0	0	0	0	0	0	6	29	1	0	0	0	1	0	0	0	0	1	55	513	62	3	8	11	k__Bacteria;p__Planctomycetota;c__Planctomycetes;o__Pirellulales;f__Pirellulaceae;g__;s__
OTU_279	6	11	0	16	0	4	9	165	k__Bacteria;p__Proteobacteria;c__Gammaproteobacteria;o__Burkholderiales;f__Rhodocyclaceae;g__Niveibacterium;s__beta_proteobacterium	16	1	1	3	28	1	0	0	0	40	7	0	0	0	0	6	0	6	9	8	8	0	395	98	k__Bacteria;p__Proteobacteria;c__Gammaproteobacteria;o__Burkholderiales;f__Rhodocyclaceae;g__Niveibacterium;s__beta_proteobacterium
OTU_280	36	69	1	28	1	122	1	0	k__Bacteria;p__Firmicutes;c__Limnochordia;o__MBA03;f__MBA03;g__MBA03;s__	0	107	0	0	0	207	1	0	0	0	0	83	0	0	1	0	365	0	0	1	0	0	0	0	k__Bacteria;p__Firmicutes;c__Limnochordia;o__MBA03;f__MBA03;g__MBA03;s__
OTU_281	52	7	397	970	53	36	6	21	k__Bacteria;p__Proteobacteria;c__Gammaproteobacteria;o__Enterobacterales;f__Enterobacteriaceae;g__Citrobacter	69	53	33	6	4	11	492	672	27	1668	685	555	80	26	52	51	54	2	8	7	3	11	9	43	k__Bacteria;p__Proteobacteria;c__Gammaproteobacteria;o__Enterobacterales;f__Enterobacteriaceae;g__Citrobacter
OTU_282	9	33	20	11	12	39	5	19	k__Bacteria;p__Actinobacteriota;c__Acidimicrobiia;o__Microtrichales;f__Microtrichaceae;g__IMCC26207;s__	11	11	3	5	75	17	31	18	10	17	11	5	13	4	19	28	21	68	9	1	5	3	40	13	k__Bacteria;p__Actinobacteriota;c__Acidimicrobiia;o__Microtrichales;f__Microtrichaceae;g__IMCC26207;s__
OTU_283	5	58	0	10	0	86	0	0	k__Bacteria;p__Firmicutes;c__Clostridia;o__Oscillospirales;f__Ruminococcaceae	0	15	0	0	0	173	0	0	0	0	0	29	0	0	0	0	257	0	0	0	0	0	0	0	k__Bacteria;p__Firmicutes;c__Clostridia;o__Oscillospirales;f__Ruminococcaceae
OTU_284	18	24	42	2	3	8	100	30	k__Bacteria;p__Actinobacteriota;c__Actinobacteria;o__PeM15;f__PeM15;g__PeM15;s__	30	11	12	16	4	51	1	123	0	0	3	2	2	1	6	0	11	12	25	249	25	40	17	31	k__Bacteria;p__Actinobacteriota;c__Actinobacteria;o__PeM15;f__PeM15;g__PeM15;s__
OTU_285	3	0	0	10	1	3	13	153	k__Bacteria;p__Desulfobacterota;c__Desulfovibrionia;o__Desulfovibrionales;f__Desulfovibrionaceae;g__Desulfovibrio;s__Desulfovibrio_magneticus	7	0	0	0	0	0	0	0	0	27	1	0	0	3	0	0	0	7	19	8	10	0	356	103	k__Bacteria;p__Desulfobacterota;c__Desulfovibrionia;o__Desulfovibrionales;f__Desulfovibrionaceae;g__Desulfovibrio;s__Desulfovibrio_magneticus
OTU_287	2	1	0	10	1	2	5	231	k__Bacteria;p__Bacteroidota;c__Bacteroidia;o__Bacteroidales;f__Prolixibacteraceae;g__WCHB1-32;s__	5	0	0	0	2	0	0	0	0	29	1	0	0	0	1	0	1	5	10	2	3	0	549	143	k__Bacteria;p__Bacteroidota;c__Bacteroidia;o__Bacteroidales;f__Prolixibacteraceae;g__WCHB1-32;s__
OTU_288	14	0	13	0	0	5	142	20	k__Bacteria;p__Bacteroidota;c__Bacteroidia;o__Chitinophagales;f__Chitinophagaceae;g__Ferruginibacter;s__	30	11	1	0	0	0	37	1	0	0	0	0	0	0	0	0	0	13	388	26	12	1	12	46	k__Bacteria;p__Bacteroidota;c__Bacteroidia;o__Chitinophagales;f__Chitinophagaceae;g__Ferruginibacter;s__
OTU_289	3	2	83	1	2	10	451	129	k__Bacteria;p__Proteobacteria;c__Gammaproteobacteria;o__R7C24;f__R7C24;g__R7C24;s__	6	2	1	4	1	0	44	49	154	1	1	0	1	3	0	1	0	28	142	212	997	286	18	81	k__Bacteria;p__Proteobacteria;c__Gammaproteobacteria;o__R7C24;f__R7C24;g__R7C24;s__
OTU_290	4	1	0	25	0	1	13	118	k__Bacteria;p__Firmicutes;c__Clostridia;o__Peptostreptococcales-Tissierellales;f__Peptostreptococcaceae	11	0	0	0	0	2	0	0	0	70	4	0	0	0	0	0	0	1	19	9	11	0	274	79	k__Bacteria;p__Firmicutes;c__Clostridia;o__Peptostreptococcales-Tissierellales;f__Peptostreptococcaceae
OTU_291	2	0	0	22	0	5	11	165	k__Bacteria;p__Firmicutes;c__Clostridia;o__Christensenellales;f__Christensenellaceae;g__Christensenellaceae_R-7_group;s__	5	0	0	0	0	0	0	0	0	63	2	0	0	0	0	0	0	15	12	12	9	0	367	127	k__Bacteria;p__Firmicutes;c__Clostridia;o__Christensenellales;f__Christensenellaceae;g__Christensenellaceae_R-7_group;s__
OTU_292	2	1	18	0	1	4	142	16	k__Bacteria;p__Proteobacteria;c__Alphaproteobacteria;o__Caulobacterales;f__Caulobacteraceae;g__Phenylobacterium	5	0	0	0	3	0	4	3	47	0	0	0	0	0	1	0	0	10	23	30	372	14	9	23	k__Bacteria;p__Proteobacteria;c__Alphaproteobacteria;o__Caulobacterales;f__Caulobacteraceae;g__Phenylobacterium
OTU_293	9	97	1	1	1	5	6	61	k__Bacteria;p__Bacteroidota;c__Bacteroidia;o__Chitinophagales;f__Chitinophagaceae;g__Lacibacter;s__Lacibacter_cauensis	16	5	4	6	278	6	1	0	0	1	1	0	1	0	0	9	0	5	10	2	5	2	107	74	k__Bacteria;p__Bacteroidota;c__Bacteroidia;o__Chitinophagales;f__Chitinophagaceae;g__Lacibacter;s__Lacibacter_cauensis
OTU_294	9	42	9	2	12	7	19	65	k__Bacteria;p__Proteobacteria;c__Alphaproteobacteria;o__Rhizobiales;f__Rhizobiaceae;g__Aminobacter;s__	15	4	8	111	7	8	17	7	3	3	2	0	1	4	29	1	10	8	43	1	12	183	5	6	k__Bacteria;p__Proteobacteria;c__Alphaproteobacteria;o__Rhizobiales;f__Rhizobiaceae;g__Aminobacter;s__
OTU_295	155	8	1	3	0	0	1	19	k__Bacteria;p__Bacteroidota;c__Bacteroidia;o__Chitinophagales;f__Chitinophagaceae;g__Lacibacter;s__	279	180	6	6	6	10	1	0	0	0	5	2	0	0	0	0	0	0	3	0	0	0	18	39	k__Bacteria;p__Bacteroidota;c__Bacteroidia;o__Chitinophagales;f__Chitinophagaceae;g__Lacibacter;s__
OTU_296	1	3	101	0	0	4	57	0	k__Bacteria;p__Bacteroidota;c__Bacteroidia;o__Sphingobacteriales;f__ST-12K33;g__ST-12K33;s__	0	2	0	0	0	7	301	0	0	0	0	0	0	0	0	0	11	0	170	0	0	0	0	0	k__Bacteria;p__Bacteroidota;c__Bacteroidia;o__Sphingobacteriales;f__ST-12K33;g__ST-12K33;s__
OTU_297	0	0	7	0	0	2	152	6	k__Bacteria;p__Planctomycetota;c__Planctomycetes;o__Planctomycetales;f__;g__;s__	0	0	0	0	0	0	0	0	20	0	0	0	0	0	0	0	0	4	9	4	443	1	8	9	k__Bacteria;p__Planctomycetota;c__Planctomycetes;o__Planctomycetales;f__;g__;s__
OTU_298	1	3	36	0	0	4	120	14	k__Bacteria;p__Myxococcota;c__Polyangia;o__Polyangiales;f__BIrii41;g__BIrii41	3	0	0	5	2	0	50	55	1	0	0	0	0	0	0	0	0	12	186	147	26	7	16	19	k__Bacteria;p__Myxococcota;c__Polyangia;o__Polyangiales;f__BIrii41;g__BIrii41
OTU_299	5	0	0	2	1	1	4	161	k__Bacteria;p__Fibrobacterota;c__Fibrobacteria;o__Fibrobacterales;f__Fibrobacteraceae;g__;s__	11	3	0	0	0	0	0	0	0	0	5	0	3	0	0	0	0	1	3	5	3	0	50	431	k__Bacteria;p__Fibrobacterota;c__Fibrobacteria;o__Fibrobacterales;f__Fibrobacteraceae;g__;s__
OTU_300	2	1	9	1	0	2	130	20	k__Bacteria;p__Planctomycetota;c__Planctomycetes;o__Isosphaerales;f__Isosphaeraceae	1	2	2	3	0	0	6	17	3	0	2	0	0	0	0	0	1	5	90	274	26	15	16	29	k__Bacteria;p__Planctomycetota;c__Planctomycetes;o__Isosphaerales;f__Isosphaeraceae
OTU_301	0	0	5	0	0	1	196	0	k__Bacteria	0	0	0	0	0	0	4	9	0	0	0	0	0	0	0	0	0	3	214	373	1	0	0	0	k__Bacteria
OTU_302	1	1	11	5	4	10	0	1	k__Bacteria;p__Bacteroidota;c__Bacteroidia;o__Flavobacteriales;f__Flavobacteriaceae;g__Flavobacterium	0	1	1	0	0	1	21	4	6	3	2	9	1	0	9	4	15	9	0	0	0	3	0	0	k__Bacteria;p__Bacteroidota;c__Bacteroidia;o__Flavobacteriales;f__Flavobacteriaceae;g__Flavobacterium
OTU_303	0	0	0	212	0	0	0	0	k__Bacteria;p__Proteobacteria;c__Gammaproteobacteria;o__Coxiellales;f__Coxiellaceae;g__Coxiella;s__Coxiella_endosymbiont	0	0	0	0	0	0	0	0	0	636	0	0	0	0	0	0	0	0	0	0	0	0	0	0	k__Bacteria;p__Proteobacteria;c__Gammaproteobacteria;o__Coxiellales;f__Coxiellaceae;g__Coxiella;s__Coxiella_endosymbiont
OTU_304	0	0	41	0	0	6	73	9	k__Bacteria;p__Proteobacteria;c__Alphaproteobacteria;o__Azospirillales;f__Inquilinaceae;g__Inquilinus;s__	0	0	0	0	0	0	121	0	1	0	0	0	0	0	0	0	0	16	187	4	27	0	10	17	k__Bacteria;p__Proteobacteria;c__Alphaproteobacteria;o__Azospirillales;f__Inquilinaceae;g__Inquilinus;s__
OTU_305	0	0	10	6	9	17	0	0	k__Bacteria;p__Proteobacteria;c__Gammaproteobacteria	0	0	0	0	0	0	10	11	7	3	11	4	8	9	9	7	10	34	0	0	0	0	0	0	k__Bacteria;p__Proteobacteria;c__Gammaproteobacteria
OTU_306	14	29	0	22	1	11	21	90	k__Bacteria;p__Proteobacteria;c__Gammaproteobacteria;o__Xanthomonadales;f__Xanthomonadaceae;g__Silanimonas;s__	33	6	3	7	67	13	0	0	0	52	10	3	0	1	0	22	0	11	24	22	17	0	188	81	k__Bacteria;p__Proteobacteria;c__Gammaproteobacteria;o__Xanthomonadales;f__Xanthomonadaceae;g__Silanimonas;s__
OTU_307	17	112	1	1	18	1	0	12	k__Bacteria;p__Bacteroidota;c__Bacteroidia;o__Chitinophagales;f__;g__;s__	30	9	12	313	7	16	1	0	0	0	3	0	0	0	53	0	0	1	0	0	0	36	0	0	k__Bacteria;p__Bacteroidota;c__Bacteroidia;o__Chitinophagales;f__;g__;s__
OTU_308	0	0	15	0	0	2	155	5	k__Bacteria;p__Bacteroidota;c__Kapabacteria;o__Kapabacteriales;f__Kapabacteriales;g__Kapabacteriales;s__	0	0	0	0	0	0	0	43	0	0	0	0	0	0	0	0	0	4	8	451	5	0	6	8	k__Bacteria;p__Bacteroidota;c__Kapabacteria;o__Kapabacteriales;f__Kapabacteriales;g__Kapabacteriales;s__
OTU_309	6	7	22	10	10	20	24	18	k__Bacteria;p__Proteobacteria;c__Gammaproteobacteria;o__Xanthomonadales;f__Xanthomonadaceae;g__Pseudoxanthomonas;s__Pseudoxanthomonas_mexicana	11	4	1	0	9	10	37	9	19	12	14	4	7	15	6	16	7	36	10	3	58	10	28	15	k__Bacteria;p__Proteobacteria;c__Gammaproteobacteria;o__Xanthomonadales;f__Xanthomonadaceae;g__Pseudoxanthomonas;s__Pseudoxanthomonas_mexicana
OTU_310	39	3	3	1	0	2	86	3	k__Bacteria;p__Bacteroidota;c__Bacteroidia;o__Chitinophagales;f__Chitinophagaceae	67	44	4	1	4	4	7	1	0	0	3	0	0	0	0	0	0	5	246	8	4	0	0	9	k__Bacteria;p__Bacteroidota;c__Bacteroidia;o__Chitinophagales;f__Chitinophagaceae
OTU_311	16	14	62	4	4	7	225	52	k__Bacteria;p__Actinobacteriota;c__Actinobacteria;o__Micrococcales;f__Microbacteriaceae	25	21	2	25	11	5	139	16	31	6	4	2	4	1	6	7	1	11	506	52	117	66	30	59	k__Bacteria;p__Actinobacteriota;c__Actinobacteria;o__Micrococcales;f__Microbacteriaceae
OTU_312	8	1	15	2	1	1	79	31	k__Bacteria;p__Patescibacteria;c__Saccharimonadia;o__Saccharimonadales;f__Saccharimonadales;g__Saccharimonadales;s__	18	6	0	0	0	1	0	35	8	0	5	0	1	0	0	0	0	2	16	160	61	5	29	58	k__Bacteria;p__Patescibacteria;c__Saccharimonadia;o__Saccharimonadales;f__Saccharimonadales;g__Saccharimonadales;s__
OTU_313	11	1	5	3	2	6	61	307	k__Bacteria;p__Proteobacteria;c__Gammaproteobacteria;o__Burkholderiales;f__Sutterellaceae;g__;s__	28	3	0	0	0	3	1	2	11	0	6	1	1	0	4	0	3	13	20	10	153	787	9	123	k__Bacteria;p__Proteobacteria;c__Gammaproteobacteria;o__Burkholderiales;f__Sutterellaceae;g__;s__
OTU_314	0	0	0	0	0	1	0	0	k__Bacteria	0	0	0	0	0	0	0	0	0	0	0	0	0	0	0	0	1	2	0	0	0	0	0	0	k__Bacteria
OTU_315	0	0	18	1	0	2	157	32	k__Bacteria;p__Acidobacteriota;c__Vicinamibacteria;o__Vicinamibacterales;f__;g__;s__	0	0	0	0	0	0	2	0	50	0	1	0	0	0	0	0	0	5	33	5	432	68	15	11	k__Bacteria;p__Acidobacteriota;c__Vicinamibacteria;o__Vicinamibacterales;f__;g__;s__
OTU_316	4	8	0	8	1	0	12	106	k__Bacteria;p__Armatimonadota;c__Fimbriimonadia;o__Fimbriimonadales;f__Fimbriimonadaceae;g__Fimbriimonadaceae;s__	6	0	4	0	22	0	0	0	0	18	3	1	0	1	0	0	0	0	10	12	12	0	258	59	k__Bacteria;p__Armatimonadota;c__Fimbriimonadia;o__Fimbriimonadales;f__Fimbriimonadaceae;g__Fimbriimonadaceae;s__
OTU_317	36	92	6	4	21	4	7	2	k__Bacteria;p__Actinobacteriota;c__Actinobacteria;o__Micrococcales	47	34	27	244	8	22	6	8	4	3	3	4	3	3	56	1	5	5	4	14	2	1	0	4	k__Bacteria;p__Actinobacteriota;c__Actinobacteria;o__Micrococcales
OTU_318	12	7	17	10	10	15	27	107	k__Bacteria;p__Chloroflexi;c__Anaerolineae;o__SBR1031;f__A4b	29	3	3	0	1	18	18	11	20	13	12	3	5	15	10	7	14	23	11	15	53	17	40	263	k__Bacteria;p__Chloroflexi;c__Anaerolineae;o__SBR1031;f__A4b
OTU_319	16	13	7	2	8	21	0	0	k__Bacteria;p__Bacteroidota;c__Bacteroidia;o__Sphingobacteriales;f__Lentimicrobiaceae;g__Lentimicrobium;s__Lentimicrobium_saccharophilum	19	15	12	8	4	26	16	2	1	1	1	3	0	17	5	2	61	0	0	0	0	0	0	0	k__Bacteria;p__Bacteroidota;c__Bacteroidia;o__Sphingobacteriales;f__Lentimicrobiaceae;g__Lentimicrobium;s__Lentimicrobium_saccharophilum
OTU_320	4	3	0	13	4	1	13	117	k__Bacteria;p__Firmicutes;c__Clostridia;o__Christensenellales;f__Christensenellaceae;g__Christensenellaceae_R-7_group	11	1	0	2	1	4	0	0	0	31	8	0	0	12	0	0	0	3	21	3	13	0	271	79	k__Bacteria;p__Firmicutes;c__Clostridia;o__Christensenellales;f__Christensenellaceae;g__Christensenellaceae_R-7_group
OTU_321	0	0	2	231	1	3	0	1	k__Bacteria;p__Firmicutes;c__Clostridia;o__Lachnospirales;f__Lachnospiraceae;g__Lachnospiraceae_UCG-004;s__	0	0	0	0	0	0	4	1	0	685	0	6	0	0	1	6	3	0	0	0	0	0	1	0	k__Bacteria;p__Firmicutes;c__Clostridia;o__Lachnospirales;f__Lachnospiraceae;g__Lachnospiraceae_UCG-004;s__
OTU_322	150	32	3	8	0	1	3	12	k__Bacteria;p__Proteobacteria;c__Alphaproteobacteria	221	202	25	15	27	53	0	7	0	0	13	10	0	0	0	0	0	2	1	2	5	0	1	33	k__Bacteria;p__Proteobacteria;c__Alphaproteobacteria
OTU_323	0	0	46	1	0	4	71	11	k__Bacteria;p__Proteobacteria;c__Alphaproteobacteria;o__;f__;g__;s__Lacibacterium_aquatile	0	0	0	0	0	0	123	5	9	0	1	0	0	0	0	0	0	11	155	6	51	2	14	15	k__Bacteria;p__Proteobacteria;c__Alphaproteobacteria;o__;f__;g__;s__Lacibacterium_aquatile
OTU_324	1	0	33	2	1	7	123	21	k__Bacteria;p__Myxococcota;c__Polyangia;o__Polyangiales;f__BIrii41;g__BIrii41;s__	2	0	0	0	0	0	20	67	11	0	5	0	2	0	0	0	0	19	80	193	96	2	22	38	k__Bacteria;p__Myxococcota;c__Polyangia;o__Polyangiales;f__BIrii41;g__BIrii41;s__
OTU_325	5	2	0	0	2	0	1	0	k__Bacteria;p__Patescibacteria;c__Saccharimonadia;o__Saccharimonadales;f__Saccharimonadales;g__Saccharimonadales;s__	6	6	3	1	1	2	0	0	0	0	0	0	0	5	0	0	0	0	0	0	3	0	0	0	k__Bacteria;p__Patescibacteria;c__Saccharimonadia;o__Saccharimonadales;f__Saccharimonadales;g__Saccharimonadales;s__
OTU_326	74	0	20	46	0	0	0	0	Unknown	45	73	102	0	0	0	23	23	12	82	47	9	0	0	0	0	0	0	0	0	0	0	0	0	Unknown
OTU_327	0	0	10	0	0	1	114	7	k__Bacteria;p__Planctomycetota;c__Planctomycetes;o__Gemmatales;f__Gemmataceae;g__;s__	0	0	0	0	0	0	0	22	8	0	0	0	0	0	0	0	0	1	13	215	112	3	5	12	k__Bacteria;p__Planctomycetota;c__Planctomycetes;o__Gemmatales;f__Gemmataceae;g__;s__
OTU_328	10	17	39	7	7	7	155	104	k__Bacteria;p__Proteobacteria;c__Alphaproteobacteria;o__Rhizobiales;f__Hyphomicrobiaceae;g__Hyphomicrobium;s__	15	6	7	39	3	7	51	26	38	15	4	2	2	5	13	1	3	15	197	85	182	169	66	77	k__Bacteria;p__Proteobacteria;c__Alphaproteobacteria;o__Rhizobiales;f__Hyphomicrobiaceae;g__Hyphomicrobium;s__
OTU_329	4	36	11	1	0	4	119	11	k__Bacteria;p__Bacteroidota;c__Bacteroidia;o__Chitinophagales;f__Chitinophagaceae	3	2	7	9	94	4	30	0	3	0	0	1	0	0	0	3	0	7	319	1	36	1	9	22	k__Bacteria;p__Bacteroidota;c__Bacteroidia;o__Chitinophagales;f__Chitinophagaceae
OTU_330	1	1	91	0	0	2	46	0	k__Bacteria;p__Desulfobacterota;c__Syntrophia;o__Syntrophales;f__Smithellaceae;g__Smithella;s__	0	2	0	0	0	2	271	0	0	0	0	0	0	0	0	0	5	0	136	0	0	0	0	0	k__Bacteria;p__Desulfobacterota;c__Syntrophia;o__Syntrophales;f__Smithellaceae;g__Smithella;s__
OTU_331	2	0	10	64	2	1	0	0	Unknown	2	2	0	0	0	0	0	24	5	125	45	20	4	1	1	0	3	0	0	0	0	0	0	0	Unknown
OTU_332	36	21	4	1	0	3	54	47	k__Bacteria;p__Bacteroidota;c__Bacteroidia;o__Sphingobacteriales;f__env.OPS_17;g__env.OPS_17;s__	45	62	1	0	1	62	10	2	0	0	1	0	0	0	0	0	2	6	126	32	4	1	16	123	k__Bacteria;p__Bacteroidota;c__Bacteroidia;o__Sphingobacteriales;f__env.OPS_17;g__env.OPS_17;s__
OTU_333	11	135	0	1	0	3	0	11	k__Bacteria;p__Cyanobacteria;c__Cyanobacteriia;o__Chloroplast;f__Chloroplast;g__Chloroplast;s__Planoglabratella_opercularis	15	15	2	5	386	14	0	0	0	0	1	0	0	0	0	8	1	0	0	0	0	0	5	26	k__Bacteria;p__Cyanobacteria;c__Cyanobacteriia;o__Chloroplast;f__Chloroplast;g__Chloroplast;s__Planoglabratella_opercularis
OTU_334	1	0	16	1	0	2	111	10	k__Bacteria;p__Proteobacteria;c__Alphaproteobacteria;o__Caulobacterales;f__Hyphomonadaceae;g__SWB02;s__	3	0	0	0	0	0	0	0	47	0	1	0	0	0	0	0	0	5	16	8	309	3	12	14	k__Bacteria;p__Proteobacteria;c__Alphaproteobacteria;o__Caulobacterales;f__Hyphomonadaceae;g__SWB02;s__
OTU_335	5	2	61	6	5	11	161	50	k__Bacteria;p__Proteobacteria;c__Alphaproteobacteria;o__Rhizobiales;f__Hyphomicrobiaceae;g__Pedomicrobium	12	0	1	1	0	3	127	4	51	12	5	0	2	0	11	0	6	25	261	39	182	49	46	55	k__Bacteria;p__Proteobacteria;c__Alphaproteobacteria;o__Rhizobiales;f__Hyphomicrobiaceae;g__Pedomicrobium
OTU_336	26	1	33	193	60	22	1	19	k__Bacteria;p__Firmicutes;c__Clostridia;o__Lachnospirales;f__Lachnospiraceae;g__Agathobacter;s__Eubacterium_rectale	6	8	62	1	0	2	53	28	16	537	17	23	153	10	15	16	42	7	0	1	1	0	52	3	k__Bacteria;p__Firmicutes;c__Clostridia;o__Lachnospirales;f__Lachnospiraceae;g__Agathobacter;s__Eubacterium_rectale
OTU_337	8	13	29	2	1	6	132	20	k__Bacteria;p__Proteobacteria;c__Gammaproteobacteria;o__Burkholderiales;f__Oxalobacteraceae	9	7	6	1	31	5	61	17	8	0	2	2	2	0	1	9	0	9	294	36	65	18	9	31	k__Bacteria;p__Proteobacteria;c__Gammaproteobacteria;o__Burkholderiales;f__Oxalobacteraceae
OTU_338	7	1	77	239	41	42	2	49	k__Bacteria;p__Firmicutes;c__Clostridia;o__Lachnospirales;f__Lachnospiraceae;g__Eubacterium_hallii_group	10	0	10	0	2	0	104	74	52	636	57	23	50	29	43	39	76	11	1	0	3	1	131	15	k__Bacteria;p__Firmicutes;c__Clostridia;o__Lachnospirales;f__Lachnospiraceae;g__Eubacterium_hallii_group
OTU_339	130	7	0	2	0	0	1	2	k__Bacteria;p__Bacteroidota;c__Bacteroidia;o__Sphingobacteriales;f__NS11-12_marine_group;g__NS11-12_marine_group;s__	44	343	3	7	1	11	0	0	0	1	1	4	0	0	0	0	0	0	0	0	1	0	0	4	k__Bacteria;p__Bacteroidota;c__Bacteroidia;o__Sphingobacteriales;f__NS11-12_marine_group;g__NS11-12_marine_group;s__
OTU_340	1	1	24	0	0	3	82	25	k__Bacteria;p__Proteobacteria;c__Alphaproteobacteria;o__Reyranellales;f__Reyranellaceae;g__Reyranella;s__	0	1	2	0	0	3	71	0	0	0	0	0	0	0	0	2	0	5	218	9	19	51	11	11	k__Bacteria;p__Proteobacteria;c__Alphaproteobacteria;o__Reyranellales;f__Reyranellaceae;g__Reyranella;s__
OTU_341	29	11	59	4	5	8	143	62	k__Bacteria;p__Actinobacteriota;c__Actinobacteria;o__Frankiales;f__Sporichthyaceae;g__Longivirga;s__	54	18	13	10	9	14	148	8	20	2	9	1	4	1	8	2	4	17	313	45	71	39	35	110	k__Bacteria;p__Actinobacteriota;c__Actinobacteria;o__Frankiales;f__Sporichthyaceae;g__Longivirga;s__
OTU_342	2	3	4	2	0	0	99	39	k__Bacteria;p__Planctomycetota;c__Planctomycetes;o__Isosphaerales;f__Isosphaeraceae;g__Tundrisphaera;s__	5	0	0	0	7	0	9	0	2	4	1	0	0	0	0	0	0	0	253	7	37	3	42	71	k__Bacteria;p__Planctomycetota;c__Planctomycetes;o__Isosphaerales;f__Isosphaeraceae;g__Tundrisphaera;s__
OTU_343	8	0	16	0	1	5	127	6	k__Bacteria;p__Bacteroidota;c__Bacteroidia;o__Cytophagales;f__Microscillaceae;g__;s__	1	0	21	0	0	0	19	1	27	0	0	0	2	0	0	0	0	14	104	4	271	0	2	15	k__Bacteria;p__Bacteroidota;c__Bacteroidia;o__Cytophagales;f__Microscillaceae;g__;s__
OTU_344	11	15	20	4	6	4	53	67	k__Bacteria;p__Proteobacteria;c__Alphaproteobacteria;o__Rhizobiales;f__Hyphomicrobiaceae;g__Hyphomicrobium;s__	22	2	8	30	6	8	23	17	19	0	12	0	2	2	14	0	0	10	51	30	77	111	13	75	k__Bacteria;p__Proteobacteria;c__Alphaproteobacteria;o__Rhizobiales;f__Hyphomicrobiaceae;g__Hyphomicrobium;s__
OTU_345	6	7	9	15	0	3	32	127	k__Bacteria;p__Proteobacteria;c__Gammaproteobacteria;o__Burkholderiales	10	5	1	0	16	3	8	5	12	39	4	1	0	0	0	2	0	7	32	9	55	4	286	91	k__Bacteria;p__Proteobacteria;c__Gammaproteobacteria;o__Burkholderiales
OTU_346	0	0	0	125	0	0	0	0	k__Bacteria;p__Firmicutes;c__Clostridia;o__Clostridiales;f__Clostridiaceae;g__Clostridium_sensu_stricto_12;s__Clostridium_kluyveri	0	0	0	0	0	0	0	0	0	375	0	0	0	0	0	0	0	0	0	0	0	0	0	0	k__Bacteria;p__Firmicutes;c__Clostridia;o__Clostridiales;f__Clostridiaceae;g__Clostridium_sensu_stricto_12;s__Clostridium_kluyveri
OTU_347	0	0	33	0	0	2	80	9	k__Bacteria;p__Proteobacteria;c__Gammaproteobacteria;o__Legionellales;f__Legionellaceae;g__Legionella	0	0	0	0	0	0	99	0	0	0	0	0	0	0	0	0	0	4	214	8	17	0	8	18	k__Bacteria;p__Proteobacteria;c__Gammaproteobacteria;o__Legionellales;f__Legionellaceae;g__Legionella
OTU_348	5	0	12	108	0	0	0	0	Unknown	4	2	7	0	0	0	16	16	2	282	27	14	0	0	0	0	0	0	0	0	0	0	0	0	Unknown
OTU_349	1	6	6	1	0	3	131	8	k__Bacteria;p__Proteobacteria;c__Gammaproteobacteria;o__Burkholderiales;f__Comamonadaceae	1	0	1	0	16	0	0	1	15	1	0	0	0	0	0	0	0	7	13	15	364	1	10	12	k__Bacteria;p__Proteobacteria;c__Gammaproteobacteria;o__Burkholderiales;f__Comamonadaceae
OTU_350	18	72	0	0	17	0	0	1	k__Bacteria;p__Proteobacteria;c__Alphaproteobacteria;o__Rhodobacterales;f__Rhodobacteraceae;g__Roseobacter_clade_CHAB-I-5_lineage;s__	28	15	11	193	15	6	0	0	0	0	0	0	0	0	49	0	0	0	0	0	0	1	1	0	k__Bacteria;p__Proteobacteria;c__Alphaproteobacteria;o__Rhodobacterales;f__Rhodobacteraceae;g__Roseobacter_clade_CHAB-I-5_lineage;s__
OTU_351	16	1	39	181	34	12	1	15	k__Bacteria;p__Firmicutes;c__Clostridia;o__Oscillospirales;f__Ruminococcaceae	6	2	38	0	0	1	68	35	13	497	32	13	72	11	17	6	27	1	1	0	1	0	41	4	k__Bacteria;p__Firmicutes;c__Clostridia;o__Oscillospirales;f__Ruminococcaceae
OTU_352	61	11	3	8	0	0	15	12	k__Bacteria;p__Proteobacteria;c__Alphaproteobacteria;o__Rhizobiales;f__Beijerinckiaceae	115	52	15	9	6	17	0	9	0	0	15	9	0	0	0	0	0	0	0	39	6	0	0	34	k__Bacteria;p__Proteobacteria;c__Alphaproteobacteria;o__Rhizobiales;f__Beijerinckiaceae
OTU_353	8	1	5	9	8	9	0	2	k__Bacteria;p__Firmicutes;c__Bacilli;o__Lactobacillales;f__Lactobacillaceae;g__Lactobacillus;s__Lactobacillus_johnsonii	5	7	10	1	0	0	1	9	4	15	7	3	21	0	2	3	17	6	0	0	0	0	2	2	k__Bacteria;p__Firmicutes;c__Bacilli;o__Lactobacillales;f__Lactobacillaceae;g__Lactobacillus;s__Lactobacillus_johnsonii
OTU_354	0	0	0	105	0	0	0	0	k__Bacteria;p__Proteobacteria;c__Alphaproteobacteria;o__Rickettsiales;f__Mitochondria;g__Mitochondria;s__	0	0	0	0	0	0	0	0	0	315	0	0	0	0	0	0	0	0	0	0	0	0	0	0	k__Bacteria;p__Proteobacteria;c__Alphaproteobacteria;o__Rickettsiales;f__Mitochondria;g__Mitochondria;s__
OTU_355	0	0	15	0	0	4	105	9	k__Bacteria;p__Myxococcota;c__Polyangia	0	0	0	0	0	0	5	40	0	0	0	0	0	0	0	0	0	11	48	256	10	0	12	13	k__Bacteria;p__Myxococcota;c__Polyangia
OTU_356	80	2	1	37	1	1	0	0	k__Bacteria;p__Proteobacteria;c__Gammaproteobacteria;o__Burkholderiales;f__Alcaligenaceae;g__Advenella;s__	0	238	0	0	0	4	3	0	0	0	0	110	1	0	0	0	1	0	0	0	0	0	0	0	k__Bacteria;p__Proteobacteria;c__Gammaproteobacteria;o__Burkholderiales;f__Alcaligenaceae;g__Advenella;s__
OTU_357	5	69	2	0	4	0	10	35	k__Bacteria;p__Bacteroidota;c__Bacteroidia;o__Chitinophagales;f__Chitinophagaceae;g__Ferruginibacter;s__	6	4	3	196	2	8	5	0	0	0	0	0	0	0	11	0	0	0	29	0	0	103	0	0	k__Bacteria;p__Bacteroidota;c__Bacteroidia;o__Chitinophagales;f__Chitinophagaceae;g__Ferruginibacter;s__
OTU_358	3	1	2	9	1	5	13	75	k__Bacteria;p__Proteobacteria;c__Alphaproteobacteria;o__Rhizobiales;f__Ancalomicrobiaceae;g__Ancalomicrobium;s__	7	0	0	0	1	0	5	0	0	24	3	0	2	0	0	3	0	10	15	7	17	18	150	55	k__Bacteria;p__Proteobacteria;c__Alphaproteobacteria;o__Rhizobiales;f__Ancalomicrobiaceae;g__Ancalomicrobium;s__
OTU_359	0	0	96	1	0	3	33	0	k__Bacteria;p__Firmicutes;c__Clostridia;o__Lachnospirales;f__Lachnospiraceae;g__Acetitomaculum;s__	0	0	0	0	0	0	287	0	0	0	0	1	0	0	0	0	9	0	97	0	0	0	0	0	k__Bacteria;p__Firmicutes;c__Clostridia;o__Lachnospirales;f__Lachnospiraceae;g__Acetitomaculum;s__
OTU_360	4	7	9	0	1	2	142	5	k__Bacteria;p__Bacteroidota;c__Bacteroidia;o__Flavobacteriales;f__Flavobacteriaceae;g__Flavobacterium	3	6	1	20	0	1	1	26	0	0	0	0	0	0	1	0	0	4	11	405	9	2	2	10	k__Bacteria;p__Bacteroidota;c__Bacteroidia;o__Flavobacteriales;f__Flavobacteriaceae;g__Flavobacterium
OTU_361	5	7	6	3	2	2	19	129	k__Bacteria;p__Actinobacteriota;c__Acidimicrobiia;o__Microtrichales;f__Ilumatobacteraceae;g__CL500-29_marine_group	10	1	2	14	4	1	0	1	16	1	6	0	0	2	2	0	1	3	1	2	54	334	10	43	k__Bacteria;p__Actinobacteriota;c__Acidimicrobiia;o__Microtrichales;f__Ilumatobacteraceae;g__CL500-29_marine_group
OTU_362	8	37	0	6	0	10	4	67	k__Bacteria;p__Proteobacteria;c__Gammaproteobacteria;o__Burkholderiales;f__Rhodocyclaceae;g__Propionivibrio;s__	13	8	1	6	98	7	0	0	0	17	1	0	0	0	0	23	1	5	7	1	3	0	154	45	k__Bacteria;p__Proteobacteria;c__Gammaproteobacteria;o__Burkholderiales;f__Rhodocyclaceae;g__Propionivibrio;s__
OTU_363	7	101	0	0	0	3	0	1	k__Bacteria;p__Patescibacteria;c__Gracilibacteria;o__JGI_0000069-P22;f__JGI_0000069-P22;g__JGI_0000069-P22;s__	6	9	5	2	0	300	0	0	0	0	0	0	0	0	0	0	7	0	0	0	0	0	0	1	k__Bacteria;p__Patescibacteria;c__Gracilibacteria;o__JGI_0000069-P22;f__JGI_0000069-P22;g__JGI_0000069-P22;s__
OTU_364	15	1	7	0	0	2	88	4	k__Bacteria;p__Bacteroidota;c__Bacteroidia;o__Chitinophagales;f__37-13;g__37-13;s__	11	31	2	0	0	3	18	2	0	0	0	0	0	0	0	0	0	5	247	6	10	0	7	5	k__Bacteria;p__Bacteroidota;c__Bacteroidia;o__Chitinophagales;f__37-13;g__37-13;s__
OTU_365	9	31	1	12	0	53	0	0	k__Bacteria;p__Firmicutes;c__Clostridia;o__Clostridia;f__Hungateiclostridiaceae;g__HN-HF0106;s__	0	27	0	0	0	93	2	0	0	0	0	34	0	0	0	0	157	0	0	0	0	0	0	0	k__Bacteria;p__Firmicutes;c__Clostridia;o__Clostridia;f__Hungateiclostridiaceae;g__HN-HF0106;s__
OTU_366	0	1	0	0	0	0	1	107	k__Bacteria;p__Bdellovibrionota;c__Bdellovibrionia;o__Bdellovibrionales;f__Bdellovibrionaceae;g__Bdellovibrio;s__	0	0	0	1	0	0	0	0	0	0	0	0	0	0	0	0	0	0	0	0	1	320	0	0	k__Bacteria;p__Bdellovibrionota;c__Bdellovibrionia;o__Bdellovibrionales;f__Bdellovibrionaceae;g__Bdellovibrio;s__
OTU_367	0	0	27	0	0	2	108	7	k__Bacteria;p__Proteobacteria;c__Gammaproteobacteria;o__WD260;f__WD260;g__WD260;s__	0	0	0	0	0	0	80	0	0	0	0	0	0	0	0	0	0	5	300	8	16	0	5	14	k__Bacteria;p__Proteobacteria;c__Gammaproteobacteria;o__WD260;f__WD260;g__WD260;s__
OTU_368	1	0	3	281	4	1	0	1	k__Bacteria;p__Bacteroidota;c__Bacteroidia;o__Bacteroidales;f__Bacteroidaceae;g__Bacteroides;s__Bacteroides_stercoris	0	0	3	0	0	0	8	0	1	836	3	4	7	0	5	0	3	0	0	0	0	0	1	0	k__Bacteria;p__Bacteroidota;c__Bacteroidia;o__Bacteroidales;f__Bacteroidaceae;g__Bacteroides;s__Bacteroides_stercoris
OTU_369	45	148	18	40	19	31	109	766	k__Bacteria;p__Proteobacteria;c__Alphaproteobacteria;o__Rhodobacterales;f__Rhodobacteraceae	79	26	30	271	117	56	25	28	1	102	16	1	3	3	49	46	2	45	107	144	75	337	1310	651	k__Bacteria;p__Proteobacteria;c__Alphaproteobacteria;o__Rhodobacterales;f__Rhodobacteraceae
OTU_370	33	24	1	6	0	4	5	88	k__Bacteria;p__Proteobacteria;c__Gammaproteobacteria;o__Burkholderiales;f__Rhodocyclaceae;g__Dechloromonas;s__Dechloromonas_sp.	68	27	2	3	64	3	3	0	0	14	2	0	0	0	0	5	2	3	6	4	5	2	198	64	k__Bacteria;p__Proteobacteria;c__Gammaproteobacteria;o__Burkholderiales;f__Rhodocyclaceae;g__Dechloromonas;s__Dechloromonas_sp.
OTU_371	1	0	18	172	5	7	0	8	k__Bacteria;p__Firmicutes;c__Bacilli;o__Lactobacillales;f__Lactobacillaceae;g__Lactobacillus	2	1	0	0	0	0	25	15	13	493	11	10	5	1	9	11	9	0	0	0	0	0	24	0	k__Bacteria;p__Firmicutes;c__Bacilli;o__Lactobacillales;f__Lactobacillaceae;g__Lactobacillus
OTU_372	5	16	38	3	3	5	115	27	k__Bacteria;p__Acidobacteriota;c__Acidobacteriae;o__Bryobacterales;f__Bryobacteraceae;g__Bryobacter;s__	11	2	2	43	3	2	105	5	4	3	4	0	0	0	7	0	0	15	242	46	57	19	16	44	k__Bacteria;p__Acidobacteriota;c__Acidobacteriae;o__Bryobacterales;f__Bryobacteraceae;g__Bryobacter;s__
OTU_373	0	0	32	0	0	1	75	5	k__Bacteria;p__Myxococcota;c__Polyangia;o__Polyangiales;f__Polyangiaceae;g__Pajaroellobacter;s__	0	0	0	0	0	0	0	95	0	0	0	0	0	0	0	0	0	1	15	193	16	0	2	13	k__Bacteria;p__Myxococcota;c__Polyangia;o__Polyangiales;f__Polyangiaceae;g__Pajaroellobacter;s__
OTU_374	3	6	12	0	0	2	71	22	k__Bacteria;p__Bacteroidota;c__Bacteroidia;o__Chitinophagales;f__Chitinophagaceae;g__Lacibacter;s__	4	3	0	1	15	0	27	2	5	0	0	0	0	0	0	1	0	3	180	6	27	1	40	24	k__Bacteria;p__Bacteroidota;c__Bacteroidia;o__Chitinophagales;f__Chitinophagaceae;g__Lacibacter;s__
OTU_375	13	91	0	1	0	11	1	3	k__Bacteria;p__Firmicutes;c__Bacilli;o__Erysipelotrichales;f__Erysipelotrichaceae;g__ZOR0006	15	15	8	1	261	10	0	0	0	2	0	0	0	0	0	33	0	0	1	0	0	0	5	2	k__Bacteria;p__Firmicutes;c__Bacilli;o__Erysipelotrichales;f__Erysipelotrichaceae;g__ZOR0006
OTU_376	7	1	19	98	23	8	0	16	k__Bacteria;p__Firmicutes;c__Clostridia;o__Lachnospirales;f__Lachnospiraceae;g__Roseburia	5	4	11	3	0	0	17	23	15	247	34	11	44	7	16	3	18	1	0	0	0	0	32	14	k__Bacteria;p__Firmicutes;c__Clostridia;o__Lachnospirales;f__Lachnospiraceae;g__Roseburia
OTU_377	1	3	9	3	5	10	1	4	k__Bacteria;p__Bacteroidota;c__Bacteroidia;o__Chitinophagales;f__Chitinophagaceae;g__Parasegetibacter;s__Parasegetibacter_luojiensis	1	0	0	1	7	0	16	1	9	2	4	1	5	4	5	9	6	15	0	0	2	1	5	5	k__Bacteria;p__Bacteroidota;c__Bacteroidia;o__Chitinophagales;f__Chitinophagaceae;g__Parasegetibacter;s__Parasegetibacter_luojiensis
OTU_378	7	2	63	11	2	8	177	87	k__Bacteria;p__Proteobacteria;c__Alphaproteobacteria;o__Micropepsales;f__Micropepsaceae;g__;s__	11	10	0	3	2	0	91	83	13	20	9	3	4	0	1	1	0	21	272	160	98	118	59	83	k__Bacteria;p__Proteobacteria;c__Alphaproteobacteria;o__Micropepsales;f__Micropepsaceae;g__;s__
OTU_379	1	1	21	0	0	2	96	8	k__Bacteria;p__Proteobacteria;c__Gammaproteobacteria;o__Burkholderiales;f__Sutterellaceae;g__AAP99	0	3	0	0	1	0	54	0	9	0	0	0	0	0	0	0	0	6	236	9	42	0	6	16	k__Bacteria;p__Proteobacteria;c__Gammaproteobacteria;o__Burkholderiales;f__Sutterellaceae;g__AAP99
OTU_380	4	1	25	1	2	3	75	29	k__Bacteria;p__Actinobacteriota;c__Acidimicrobiia;o__IMCC26256;f__IMCC26256;g__IMCC26256;s__	8	0	2	3	0	0	1	66	6	0	3	0	2	0	3	0	3	5	8	171	45	53	4	28	k__Bacteria;p__Actinobacteriota;c__Acidimicrobiia;o__IMCC26256;f__IMCC26256;g__IMCC26256;s__
OTU_381	8	2	9	2	0	1	150	115	k__Bacteria;p__Bacteroidota;c__Bacteroidia;o__Cytophagales;f__Spirosomaceae;g__Emticicia;s__	3	21	0	3	1	1	3	0	22	0	1	3	0	0	0	0	0	3	9	9	432	321	13	11	k__Bacteria;p__Bacteroidota;c__Bacteroidia;o__Cytophagales;f__Spirosomaceae;g__Emticicia;s__
OTU_382	4	5	27	2	2	3	66	15	k__Bacteria;p__Actinobacteriota;c__Acidimicrobiia;o__Microtrichales;f__Iamiaceae;g__Iamia	10	1	0	5	7	1	76	5	0	1	4	1	1	2	2	1	1	6	164	17	17	9	14	20	k__Bacteria;p__Actinobacteriota;c__Acidimicrobiia;o__Microtrichales;f__Iamiaceae;g__Iamia
OTU_383	2	0	31	1	0	2	72	8	k__Bacteria;p__Proteobacteria;c__Gammaproteobacteria;o__Cellvibrionales;f__Cellvibrionaceae;g__;s__	4	0	0	0	0	0	93	0	0	0	2	0	0	0	0	0	0	5	177	12	26	0	2	21	k__Bacteria;p__Proteobacteria;c__Gammaproteobacteria;o__Cellvibrionales;f__Cellvibrionaceae;g__;s__
OTU_384	3	1	2	7	2	93	10	24	k__Bacteria;p__Cyanobacteria;c__Cyanobacteriia;o__Chloroplast;f__Chloroplast;g__Chloroplast	7	0	1	0	2	0	3	3	0	3	6	10	4	1	1	1	0	276	12	5	11	53	3	16	k__Bacteria;p__Cyanobacteria;c__Cyanobacteriia;o__Chloroplast;f__Chloroplast;g__Chloroplast
OTU_385	0	0	5	4	1	5	0	0	k__Bacteria;p__Bacteroidota;c__Bacteroidia;o__Sphingobacteriales;f__Sphingobacteriaceae;g__Nubsella;s__	0	0	0	0	0	0	8	3	3	2	6	3	0	0	3	4	4	7	0	0	0	0	0	0	k__Bacteria;p__Bacteroidota;c__Bacteroidia;o__Sphingobacteriales;f__Sphingobacteriaceae;g__Nubsella;s__
OTU_386	7	1	19	130	16	9	1	19	k__Bacteria;p__Proteobacteria;c__Gammaproteobacteria;o__Pasteurellales;f__Pasteurellaceae;g__Haemophilus;s__Haemophilus_parainfluenzae	4	3	13	0	0	2	27	15	13	381	7	1	29	8	9	12	15	0	1	0	2	25	29	1	k__Bacteria;p__Proteobacteria;c__Gammaproteobacteria;o__Pasteurellales;f__Pasteurellaceae;g__Haemophilus;s__Haemophilus_parainfluenzae
OTU_387	0	0	15	0	0	2	66	7	k__Bacteria;p__Proteobacteria;c__Gammaproteobacteria;o__Pseudomonadales;f__Moraxellaceae;g__Agitococcus_lubricus_group;s__	0	0	0	0	0	0	0	0	44	0	0	0	0	0	0	0	0	6	9	5	183	2	8	10	k__Bacteria;p__Proteobacteria;c__Gammaproteobacteria;o__Pseudomonadales;f__Moraxellaceae;g__Agitococcus_lubricus_group;s__
OTU_388	0	1	35	0	1	5	45	10	k__Bacteria;p__Proteobacteria;c__Alphaproteobacteria;o__Holosporales;f__Holosporaceae;g__;s__	0	0	0	3	0	0	0	99	4	0	0	0	0	1	2	1	0	13	11	99	24	3	10	15	k__Bacteria;p__Proteobacteria;c__Alphaproteobacteria;o__Holosporales;f__Holosporaceae;g__;s__
OTU_389	6	20	0	0	2	0	0	4	k__Bacteria;p__Bacteroidota;c__Bacteroidia;o__Flavobacteriales;f__Flavobacteriaceae;g__Flavobacterium;s__	5	9	3	51	4	4	0	0	0	0	0	0	0	3	3	0	0	0	0	0	0	10	0	0	k__Bacteria;p__Bacteroidota;c__Bacteroidia;o__Flavobacteriales;f__Flavobacteriaceae;g__Flavobacterium;s__
OTU_390	2	4	35	1	1	2	95	16	k__Bacteria;p__Actinobacteriota;c__Actinobacteria;o__Frankiales;f__Frankiales;g__Frankiales;s__	0	0	4	4	1	6	34	58	13	0	1	0	1	1	0	0	0	6	97	140	46	23	8	15	k__Bacteria;p__Actinobacteriota;c__Actinobacteria;o__Frankiales;f__Frankiales;g__Frankiales;s__
OTU_391	3	1	3	1	0	2	17	112	k__Bacteria;p__Patescibacteria;c__Saccharimonadia;o__Saccharimonadales;f__Saccharimonadales;g__Saccharimonadales;s__	7	0	0	0	0	2	0	0	9	0	1	0	0	0	0	0	0	4	6	1	42	291	8	36	k__Bacteria;p__Patescibacteria;c__Saccharimonadia;o__Saccharimonadales;f__Saccharimonadales;g__Saccharimonadales;s__
OTU_392	2	2	10	7	7	12	2	4	k__Bacteria;p__Proteobacteria;c__Gammaproteobacteria;o__Burkholderiales;f__Comamonadaceae;g__Pseudorhodoferax;s__	2	2	0	4	0	0	15	10	5	7	8	5	5	3	13	6	5	25	1	0	4	6	0	6	k__Bacteria;p__Proteobacteria;c__Gammaproteobacteria;o__Burkholderiales;f__Comamonadaceae;g__Pseudorhodoferax;s__
OTU_393	1	1	21	0	1	1	138	42	k__Bacteria;p__Proteobacteria;c__Gammaproteobacteria;o__Burkholderiales;f__SC-I-84;g__SC-I-84;s__	1	0	0	0	1	0	37	15	9	0	0	0	0	1	0	0	0	2	250	97	67	111	5	8	k__Bacteria;p__Proteobacteria;c__Gammaproteobacteria;o__Burkholderiales;f__SC-I-84;g__SC-I-84;s__
OTU_394	11	0	42	47	1	0	0	0	k__Bacteria	13	9	10	0	0	0	26	81	18	66	31	42	2	0	0	0	0	0	0	0	0	0	0	0	k__Bacteria
OTU_395	1	1	41	2	1	10	102	23	k__Bacteria;p__Proteobacteria;c__Alphaproteobacteria;o__Caulobacterales;f__Hyphomonadaceae;g__;s__	2	0	0	0	1	0	90	25	7	3	1	0	1	0	2	1	0	27	225	57	23	13	32	24	k__Bacteria;p__Proteobacteria;c__Alphaproteobacteria;o__Caulobacterales;f__Hyphomonadaceae;g__;s__
OTU_396	3	8	43	1	0	7	24	0	k__Bacteria;p__Bacteroidota;c__Bacteroidia;o__Bacteroidales;f__Rikenellaceae;g__DMER64;s__	0	7	0	0	0	22	127	0	0	0	0	2	0	0	0	0	21	0	70	0	0	0	0	0	k__Bacteria;p__Bacteroidota;c__Bacteroidia;o__Bacteroidales;f__Rikenellaceae;g__DMER64;s__
OTU_397	8	2	170	12	7	34	756	107	k__Bacteria;p__Proteobacteria;c__Alphaproteobacteria;o__Caulobacterales;f__Caulobacteraceae;g__Phenylobacterium;s__	7	13	4	1	0	3	205	110	194	16	14	6	10	2	7	4	13	85	617	267	1384	120	72	128	k__Bacteria;p__Proteobacteria;c__Alphaproteobacteria;o__Caulobacterales;f__Caulobacteraceae;g__Phenylobacterium;s__
OTU_398	15	64	1	3	12	2	8	17	k__Bacteria;p__Proteobacteria;c__Alphaproteobacteria;o__Rhizobiales	30	8	5	162	5	24	0	0	2	1	8	0	0	0	36	0	1	5	4	2	16	5	11	34	k__Bacteria;p__Proteobacteria;c__Alphaproteobacteria;o__Rhizobiales
OTU_399	0	0	7	0	0	4	98	7	k__Bacteria;p__Bacteroidota;c__Bacteroidia;o__Chitinophagales;f__Chitinophagaceae;g__Terrimonas	0	0	0	0	0	0	0	0	19	0	0	0	0	0	0	0	1	9	17	2	275	0	6	13	k__Bacteria;p__Bacteroidota;c__Bacteroidia;o__Chitinophagales;f__Chitinophagaceae;g__Terrimonas
OTU_400	8	9	2	1	4	9	0	0	k__Bacteria;p__Bacteroidota;c__Bacteroidia;o__Bacteroidales;f__Rikenellaceae;g__	15	4	4	6	0	19	4	0	0	0	1	0	1	8	1	1	24	0	0	0	0	0	0	0	k__Bacteria;p__Bacteroidota;c__Bacteroidia;o__Bacteroidales;f__Rikenellaceae;g__
OTU_401	14	19	3	5	2	10	6	51	k__Bacteria;p__Proteobacteria;c__Gammaproteobacteria;o__Burkholderiales;f__Burkholderiaceae;g__Lautropia;s__	37	2	3	2	3	52	5	2	0	5	8	0	3	2	0	1	12	15	9	2	7	3	12	136	k__Bacteria;p__Proteobacteria;c__Gammaproteobacteria;o__Burkholderiales;f__Burkholderiaceae;g__Lautropia;s__
OTU_402	1	1	0	0	1	0	1	9	k__Bacteria;p__Verrucomicrobiota;c__Verrucomicrobiae;o__Chthoniobacterales;f__Chthoniobacteraceae;g__Chthoniobacter;s__	2	0	1	0	0	1	0	0	0	0	0	0	0	1	1	0	0	0	1	0	0	25	0	2	k__Bacteria;p__Verrucomicrobiota;c__Verrucomicrobiae;o__Chthoniobacterales;f__Chthoniobacteraceae;g__Chthoniobacter;s__
OTU_403	13	3	16	64	10	2	2	1	k__Bacteria;p__Proteobacteria;c__Gammaproteobacteria;o__Pseudomonadales;f__Moraxellaceae;g__Enhydrobacter;s__Moraxella_osloensis	0	1	36	2	5	1	42	4	0	187	1	4	22	0	8	5	1	0	4	1	0	3	0	0	k__Bacteria;p__Proteobacteria;c__Gammaproteobacteria;o__Pseudomonadales;f__Moraxellaceae;g__Enhydrobacter;s__Moraxella_osloensis
OTU_404	42	38	0	1	3	0	1	30	k__Bacteria;p__Cyanobacteria;c__Cyanobacteriia;o__Chloroplast;f__Chloroplast;g__Chloroplast;s__Tetradesmus_obliquus	26	90	8	96	7	11	0	0	0	0	1	2	0	0	8	0	0	0	0	1	0	85	2	1	k__Bacteria;p__Cyanobacteria;c__Cyanobacteriia;o__Chloroplast;f__Chloroplast;g__Chloroplast;s__Tetradesmus_obliquus
OTU_405	0	10	0	0	3	66	0	0	k__Bacteria	0	0	0	0	0	29	0	0	0	0	0	0	0	0	8	0	0	196	0	0	0	0	0	0	k__Bacteria
OTU_406	1	1	25	1	0	4	53	10	k__Bacteria;p__Proteobacteria;c__Gammaproteobacteria;o__Coxiellales;f__Coxiellaceae;g__Coxiella;s__	2	0	0	0	0	2	32	36	5	0	1	0	0	0	0	0	0	10	76	51	31	0	11	17	k__Bacteria;p__Proteobacteria;c__Gammaproteobacteria;o__Coxiellales;f__Coxiellaceae;g__Coxiella;s__
OTU_407	6	1	27	4	1	4	123	29	k__Bacteria;p__Proteobacteria;c__Gammaproteobacteria;o__Gammaproteobacteria_Incertae_Sedis;f__Unknown_Family;g__Acidibacter;s__	16	1	1	2	0	1	9	49	22	4	6	0	0	0	1	0	0	11	36	193	140	18	18	51	k__Bacteria;p__Proteobacteria;c__Gammaproteobacteria;o__Gammaproteobacteria_Incertae_Sedis;f__Unknown_Family;g__Acidibacter;s__
OTU_408	1	1	33	1	2	4	107	73	k__Bacteria;p__Proteobacteria;c__Gammaproteobacteria;o__CCD24;f__CCD24;g__CCD24;s__	0	1	0	3	0	0	4	0	95	0	1	0	0	0	4	0	1	10	27	6	287	188	11	18	k__Bacteria;p__Proteobacteria;c__Gammaproteobacteria;o__CCD24;f__CCD24;g__CCD24;s__
OTU_409	1	11	5	0	0	1	94	10	k__Bacteria;p__Bacteroidota;c__Bacteroidia;o__Chitinophagales;f__Chitinophagaceae;g__	0	1	1	2	31	0	12	0	2	0	0	0	0	0	0	0	0	3	207	5	69	0	18	11	k__Bacteria;p__Bacteroidota;c__Bacteroidia;o__Chitinophagales;f__Chitinophagaceae;g__
OTU_410	115	17	0	7	0	0	1	9	k__Bacteria;p__Proteobacteria;c__Gammaproteobacteria;o__Burkholderiales;f__Chromobacteriaceae;g__Aquitalea;s__Aquitalea_magnusonii	272	56	16	18	19	12	0	0	0	0	17	3	0	0	0	0	0	0	2	0	0	0	0	26	k__Bacteria;p__Proteobacteria;c__Gammaproteobacteria;o__Burkholderiales;f__Chromobacteriaceae;g__Aquitalea;s__Aquitalea_magnusonii
OTU_411	2	2	11	1	0	2	79	9	k__Bacteria;p__Planctomycetota;c__Planctomycetes;o__Planctomycetales;f__Rubinisphaeraceae;g__SH-PL14;s__	2	0	2	6	0	0	25	6	2	1	1	0	0	0	0	0	0	4	192	17	26	9	2	14	k__Bacteria;p__Planctomycetota;c__Planctomycetes;o__Planctomycetales;f__Rubinisphaeraceae;g__SH-PL14;s__
OTU_412	1	2	7	4	0	2	47	66	k__Bacteria;p__Proteobacteria;c__Gammaproteobacteria;o__Burkholderiales;f__B1-7BS;g__B1-7BS;s__	2	0	0	2	3	0	8	0	13	9	2	1	0	0	0	0	0	4	15	10	116	50	113	35	k__Bacteria;p__Proteobacteria;c__Gammaproteobacteria;o__Burkholderiales;f__B1-7BS;g__B1-7BS;s__
OTU_413	10	42	15	1	5	3	182	15	k__Bacteria;p__Proteobacteria;c__Gammaproteobacteria;o__Burkholderiales;f__Comamonadaceae	13	5	11	121	2	3	33	4	6	0	1	0	1	1	13	3	0	5	408	7	131	18	7	19	k__Bacteria;p__Proteobacteria;c__Gammaproteobacteria;o__Burkholderiales;f__Comamonadaceae
OTU_414	0	1	26	0	0	2	103	8	k__Bacteria;p__Bdellovibrionota;c__Oligoflexia;o__0319-6G20;f__0319-6G20;g__0319-6G20	0	0	0	0	0	2	0	77	0	0	0	0	0	0	0	0	0	6	16	282	11	0	8	16	k__Bacteria;p__Bdellovibrionota;c__Oligoflexia;o__0319-6G20;f__0319-6G20;g__0319-6G20
OTU_415	5	1	2	3	0	2	5	81	k__Bacteria;p__Bacteroidota;c__Bacteroidia;o__Cytophagales;f__Cyclobacteriaceae;g__Algoriphagus;s__	15	0	0	0	0	3	4	0	0	1	8	0	0	0	0	0	1	3	7	4	4	0	29	214	k__Bacteria;p__Bacteroidota;c__Bacteroidia;o__Cytophagales;f__Cyclobacteriaceae;g__Algoriphagus;s__
OTU_416	2	0	41	2	0	8	159	11	k__Bacteria;p__Proteobacteria;c__Gammaproteobacteria;o__Burkholderiales;f__Rhodocyclaceae;g__Georgfuchsia;s__	2	2	0	0	0	0	90	29	2	4	0	0	0	0	0	0	0	22	358	94	25	2	8	23	k__Bacteria;p__Proteobacteria;c__Gammaproteobacteria;o__Burkholderiales;f__Rhodocyclaceae;g__Georgfuchsia;s__
OTU_417	4	47	0	3	0	96	0	0	k__Bacteria;p__Firmicutes;c__Clostridia;o__Lachnospirales	0	12	0	0	0	141	0	0	0	0	0	9	0	0	0	0	286	0	0	0	0	0	0	0	k__Bacteria;p__Firmicutes;c__Clostridia;o__Lachnospirales
OTU_418	107	19	1	6	0	1	2	24	k__Bacteria;p__Proteobacteria;c__Alphaproteobacteria;o__Rhizobiales;f__Pleomorphomonadaceae;g__;s__	197	110	13	18	19	19	1	0	0	1	13	4	0	0	0	0	0	1	2	1	1	0	13	57	k__Bacteria;p__Proteobacteria;c__Alphaproteobacteria;o__Rhizobiales;f__Pleomorphomonadaceae;g__;s__
OTU_419	0	0	0	79	0	0	0	0	k__Bacteria	0	0	0	0	0	0	0	0	0	235	1	0	0	0	0	0	0	0	0	0	0	0	0	0	k__Bacteria
OTU_420	0	0	0	0	4	13	0	0	Unknown	0	0	0	0	0	0	0	0	0	0	0	0	11	0	0	27	10	0	0	0	0	0	0	0	Unknown
OTU_421	13	4	0	0	3	0	0	1	k__Bacteria;p__Proteobacteria;c__Gammaproteobacteria;o__Burkholderiales;f__Chromobacteriaceae;g__Chromobacterium;s__Chromobacterium_rhizoryzae	8	2	29	2	6	2	0	0	0	0	0	0	1	6	0	0	0	0	0	0	0	0	1	1	k__Bacteria;p__Proteobacteria;c__Gammaproteobacteria;o__Burkholderiales;f__Chromobacteriaceae;g__Chromobacterium;s__Chromobacterium_rhizoryzae
OTU_422	0	0	15	0	0	2	72	5	k__Bacteria;p__Bdellovibrionota;c__Bdellovibrionia;o__Bdellovibrionales;f__Bdellovibrionaceae;g__Bdellovibrio;s__	0	0	0	0	0	0	0	0	43	0	0	0	0	0	0	0	0	6	9	7	198	1	2	10	k__Bacteria;p__Bdellovibrionota;c__Bdellovibrionia;o__Bdellovibrionales;f__Bdellovibrionaceae;g__Bdellovibrio;s__
OTU_423	1	0	18	71	10	12	0	13	k__Bacteria;p__Firmicutes;c__Clostridia;o__Monoglobales;f__Monoglobaceae;g__Monoglobus;s__	1	0	0	0	0	0	29	16	8	191	10	10	7	3	18	2	34	0	0	0	0	0	38	0	k__Bacteria;p__Firmicutes;c__Clostridia;o__Monoglobales;f__Monoglobaceae;g__Monoglobus;s__
OTU_424	0	1	5	1	0	2	82	7	k__Bacteria;p__Bacteroidota;c__Bacteroidia;o__Chitinophagales;f__Chitinophagaceae;g__Sediminibacterium;s__	0	0	0	0	0	1	6	0	8	0	1	0	0	0	0	0	0	6	27	9	209	0	11	8	k__Bacteria;p__Bacteroidota;c__Bacteroidia;o__Chitinophagales;f__Chitinophagaceae;g__Sediminibacterium;s__
OTU_425	0	0	7	0	0	3	77	1	k__Bacteria;p__Bacteroidota;c__Bacteroidia;o__Sphingobacteriales;f__NS11-12_marine_group;g__NS11-12_marine_group;s__	0	0	0	0	0	0	5	15	0	0	0	0	0	0	0	0	0	7	61	161	9	0	1	1	k__Bacteria;p__Bacteroidota;c__Bacteroidia;o__Sphingobacteriales;f__NS11-12_marine_group;g__NS11-12_marine_group;s__
OTU_426	2	0	21	0	1	4	152	7	k__Bacteria;p__Gemmatimonadota;c__Gemmatimonadetes;o__Gemmatimonadales;f__Gemmatimonadaceae	3	3	0	0	0	0	39	3	19	0	0	0	0	0	1	1	2	7	293	10	153	2	9	9	k__Bacteria;p__Gemmatimonadota;c__Gemmatimonadetes;o__Gemmatimonadales;f__Gemmatimonadaceae
OTU_427	0	0	30	0	0	1	101	6	k__Bacteria;p__Bdellovibrionota;c__Oligoflexia;o__0319-6G20;f__0319-6G20;g__0319-6G20	0	0	0	0	0	0	8	81	0	0	0	0	0	0	0	0	0	2	23	266	13	0	7	10	k__Bacteria;p__Bdellovibrionota;c__Oligoflexia;o__0319-6G20;f__0319-6G20;g__0319-6G20
OTU_428	1	0	20	0	0	3	62	10	k__Bacteria;p__Proteobacteria;c__Gammaproteobacteria;o__Burkholderiales;f__Nitrosomonadaceae;g__MND1;s__	0	1	0	0	0	0	8	41	11	0	0	0	0	0	0	0	0	8	32	77	77	0	7	21	k__Bacteria;p__Proteobacteria;c__Gammaproteobacteria;o__Burkholderiales;f__Nitrosomonadaceae;g__MND1;s__
OTU_429	42	7	11	6	1	1	41	7	k__Bacteria;p__Actinobacteriota;c__Thermoleophilia;o__Solirubrobacterales;f__Solirubrobacteraceae;g__	28	91	6	8	2	10	6	20	6	0	5	12	1	0	0	0	0	2	17	54	51	3	4	13	k__Bacteria;p__Actinobacteriota;c__Thermoleophilia;o__Solirubrobacterales;f__Solirubrobacteraceae;g__
OTU_430	4	1	0	1	1	1	6	105	k__Bacteria;p__Bacteroidota;c__Bacteroidia;o__Flavobacteriales;f__Flavobacteriaceae;g__Flavobacterium	10	0	0	0	0	3	0	0	0	0	2	0	0	1	0	0	0	3	7	5	6	0	48	267	k__Bacteria;p__Bacteroidota;c__Bacteroidia;o__Flavobacteriales;f__Flavobacteriaceae;g__Flavobacterium
OTU_431	1	0	12	1	0	2	83	18	k__Bacteria;p__Acidobacteriota;c__Acidobacteriae;o__Elev-16S-1166;f__Elev-16S-1166;g__Elev-16S-1166;s__	2	0	0	0	0	0	11	16	9	0	1	0	0	0	0	0	0	5	96	66	87	27	9	18	k__Bacteria;p__Acidobacteriota;c__Acidobacteriae;o__Elev-16S-1166;f__Elev-16S-1166;g__Elev-16S-1166;s__
OTU_432	13	5	11	3	1	2	81	38	k__Bacteria;p__Proteobacteria;c__Gammaproteobacteria;o__Burkholderiales;f__Comamonadaceae;g__Rhizobacter;s__	26	13	0	0	13	0	20	10	2	3	3	2	2	0	0	1	0	4	151	63	29	12	21	80	k__Bacteria;p__Proteobacteria;c__Gammaproteobacteria;o__Burkholderiales;f__Comamonadaceae;g__Rhizobacter;s__
OTU_433	1	0	20	0	0	2	72	9	k__Bacteria;p__Proteobacteria;c__Gammaproteobacteria;o__Gammaproteobacteria_Incertae_Sedis;f__Unknown_Family;g__Acidibacter;s__	1	1	0	0	0	0	36	21	3	0	0	0	0	0	0	0	0	5	116	63	36	6	3	16	k__Bacteria;p__Proteobacteria;c__Gammaproteobacteria;o__Gammaproteobacteria_Incertae_Sedis;f__Unknown_Family;g__Acidibacter;s__
OTU_434	4	0	10	0	0	1	74	2	k__Bacteria;p__Patescibacteria;c__Saccharimonadia;o__Saccharimonadales;f__Saccharimonadales;g__Saccharimonadales;s__	3	7	0	0	0	0	0	29	1	0	0	0	0	0	0	0	0	3	5	204	11	1	0	4	k__Bacteria;p__Patescibacteria;c__Saccharimonadia;o__Saccharimonadales;f__Saccharimonadales;g__Saccharimonadales;s__
OTU_435	3	2	0	11	0	2	6	129	k__Bacteria;p__Proteobacteria;c__Gammaproteobacteria;o__Burkholderiales;f__Rhodocyclaceae;g__Propionivibrio;s__	7	1	1	0	5	0	0	0	0	26	6	0	0	0	0	0	0	6	8	6	3	0	308	77	k__Bacteria;p__Proteobacteria;c__Gammaproteobacteria;o__Burkholderiales;f__Rhodocyclaceae;g__Propionivibrio;s__
OTU_436	4	14	2	1	1	1	16	54	k__Bacteria;p__Bacteroidota;c__Bacteroidia;o__Chitinophagales;f__Chitinophagaceae;g__Terrimonas;s__	10	0	1	36	4	2	1	0	3	0	2	0	1	0	2	0	0	3	11	0	36	65	9	86	k__Bacteria;p__Bacteroidota;c__Bacteroidia;o__Chitinophagales;f__Chitinophagaceae;g__Terrimonas;s__
OTU_437	0	0	1	123	1	0	0	0	k__Bacteria;p__Firmicutes;c__Clostridia;o__Lachnospirales;f__Lachnospiraceae;g__Lachnospiraceae_NK4A136_group;s__	0	0	0	0	0	0	1	0	0	368	0	0	3	0	0	0	0	0	0	0	0	0	0	0	k__Bacteria;p__Firmicutes;c__Clostridia;o__Lachnospirales;f__Lachnospiraceae;g__Lachnospiraceae_NK4A136_group;s__
OTU_438	1	1	4	0	0	1	90	6	k__Bacteria;p__Patescibacteria;c__Saccharimonadia;o__Saccharimonadales;f__Saccharimonadales;g__Saccharimonadales;s__	2	0	1	0	0	2	0	0	10	0	0	0	0	0	0	0	0	1	10	6	254	3	3	12	k__Bacteria;p__Patescibacteria;c__Saccharimonadia;o__Saccharimonadales;f__Saccharimonadales;g__Saccharimonadales;s__
OTU_439	0	0	27	1	0	4	62	7	k__Bacteria;p__Proteobacteria;c__Gammaproteobacteria;o__Diplorickettsiales;f__Diplorickettsiaceae;g__;s__	0	0	0	0	0	0	4	76	0	0	0	1	0	0	0	0	0	11	14	159	12	0	2	17	k__Bacteria;p__Proteobacteria;c__Gammaproteobacteria;o__Diplorickettsiales;f__Diplorickettsiaceae;g__;s__
OTU_440	1	0	10	0	0	0	131	2	k__Bacteria;p__Planctomycetota;c__Planctomycetes;o__Pirellulales;f__Pirellulaceae;g__	0	1	0	0	0	0	0	26	3	0	0	0	0	0	0	0	0	0	23	344	24	0	1	3	k__Bacteria;p__Planctomycetota;c__Planctomycetes;o__Pirellulales;f__Pirellulaceae;g__
OTU_441	104	0	82	44	3	0	0	0	k__Bacteria	34	55	221	0	0	0	24	30	192	100	13	19	6	2	0	0	0	0	0	0	0	0	0	0	k__Bacteria
OTU_442	6	0	34	59	6	5	2	2	k__Bacteria;p__Proteobacteria;c__Gammaproteobacteria;o__Enterobacterales;f__Morganellaceae;g__Proteus;s__Proteus_vulgaris	13	4	0	0	0	0	35	62	5	26	59	90	6	2	8	4	9	0	2	2	0	0	0	5	k__Bacteria;p__Proteobacteria;c__Gammaproteobacteria;o__Enterobacterales;f__Morganellaceae;g__Proteus;s__Proteus_vulgaris
OTU_443	0	0	1	0	0	0	97	0	k__Bacteria	0	0	0	0	0	0	1	0	0	0	0	0	0	0	0	0	0	0	182	106	1	0	0	0	k__Bacteria
OTU_444	8	51	0	0	0	12	1	4	k__Bacteria;p__Proteobacteria;c__Alphaproteobacteria;o__Paracaedibacterales;f__Paracaedibacteraceae;g__Candidatus_Finniella;s__Candidatus_Finniella	11	7	6	9	136	7	0	0	0	0	0	0	0	0	0	35	0	0	1	0	2	0	6	5	k__Bacteria;p__Proteobacteria;c__Alphaproteobacteria;o__Paracaedibacterales;f__Paracaedibacteraceae;g__Candidatus_Finniella;s__Candidatus_Finniella
OTU_445	2	1	1	0	2	2	1	64	k__Bacteria;p__Gemmatimonadota;c__Gemmatimonadetes;o__Gemmatimonadales;f__Gemmatimonadaceae;g__;s__	2	1	1	0	3	0	2	0	0	0	0	0	0	4	0	0	0	5	1	0	2	188	0	3	k__Bacteria;p__Gemmatimonadota;c__Gemmatimonadetes;o__Gemmatimonadales;f__Gemmatimonadaceae;g__;s__
OTU_446	5	67	5	2	2	10	3	36	k__Bacteria;p__Bacteroidota;c__Bacteroidia;o__Cytophagales;f__Spirosomaceae;g__Runella	7	4	2	4	191	4	11	2	2	3	1	2	0	0	4	18	2	10	1	0	6	0	89	19	k__Bacteria;p__Bacteroidota;c__Bacteroidia;o__Cytophagales;f__Spirosomaceae;g__Runella
OTU_447	1	0	0	0	1	0	0	109	k__Bacteria;p__Proteobacteria;c__Gammaproteobacteria;o__CCM19a;f__CCM19a;g__CCM19a;s__	1	0	0	0	0	0	0	0	0	0	0	0	0	1	0	0	0	0	0	0	0	327	0	0	k__Bacteria;p__Proteobacteria;c__Gammaproteobacteria;o__CCM19a;f__CCM19a;g__CCM19a;s__
OTU_448	58	7	1	0	16	0	2	0	k__Bacteria;p__Proteobacteria;c__Gammaproteobacteria;o__Pseudomonadales;f__Moraxellaceae;g__Cavicella;s__	21	5	147	7	4	9	0	0	2	0	0	0	47	0	0	0	0	0	0	0	6	0	0	0	k__Bacteria;p__Proteobacteria;c__Gammaproteobacteria;o__Pseudomonadales;f__Moraxellaceae;g__Cavicella;s__
OTU_449	0	1	13	3	7	7	0	1	k__Bacteria;p__Bacteroidota;c__Bacteroidia;o__Flavobacteriales;f__Flavobacteriaceae;g__Flavobacterium	0	0	0	2	0	0	22	10	6	1	6	1	5	6	8	5	4	11	0	0	0	1	0	0	k__Bacteria;p__Bacteroidota;c__Bacteroidia;o__Flavobacteriales;f__Flavobacteriaceae;g__Flavobacterium
OTU_450	5	66	2	3	0	6	8	105	k__Bacteria;p__Verrucomicrobiota;c__Verrucomicrobiae;o__Verrucomicrobiales;f__Verrucomicrobiaceae;g__Prosthecobacter;s__	12	1	1	1	196	0	0	1	3	8	1	0	0	0	0	17	0	0	17	3	4	0	250	65	k__Bacteria;p__Verrucomicrobiota;c__Verrucomicrobiae;o__Verrucomicrobiales;f__Verrucomicrobiaceae;g__Prosthecobacter;s__
OTU_451	8	3	19	27	7	7	100	17	k__Bacteria;p__Proteobacteria;c__Gammaproteobacteria;o__Burkholderiales;f__Rhodocyclaceae;g__Methyloversatilis	0	22	2	5	2	1	13	7	37	62	4	14	11	0	10	8	6	7	45	7	248	32	9	9	k__Bacteria;p__Proteobacteria;c__Gammaproteobacteria;o__Burkholderiales;f__Rhodocyclaceae;g__Methyloversatilis
OTU_452	1	1	24	1	0	3	98	17	k__Bacteria;p__Proteobacteria;c__Gammaproteobacteria;o__Steroidobacterales;f__Steroidobacteraceae;g__	1	0	0	0	1	1	19	38	15	1	0	0	0	0	0	0	0	7	67	126	99	0	27	23	k__Bacteria;p__Proteobacteria;c__Gammaproteobacteria;o__Steroidobacterales;f__Steroidobacteraceae;g__
OTU_453	0	1	0	1	0	0	0	92	k__Bacteria;p__Proteobacteria;c__Gammaproteobacteria;o__Burkholderiales;f__Rhodocyclaceae;g__Azospira;s__	0	0	0	1	0	0	0	0	0	1	0	0	0	0	0	0	0	0	0	0	0	273	2	0	k__Bacteria;p__Proteobacteria;c__Gammaproteobacteria;o__Burkholderiales;f__Rhodocyclaceae;g__Azospira;s__
OTU_454	15	3	20	3	1	3	17	13	k__Bacteria;p__Firmicutes;c__Clostridia;o__Clostridiales;f__Clostridiaceae;g__Clostridium_sensu_stricto_3;s__Clostridiaceae_bacterium	8	34	2	2	3	2	52	3	3	4	2	3	0	0	3	0	1	8	36	5	8	7	16	15	k__Bacteria;p__Firmicutes;c__Clostridia;o__Clostridiales;f__Clostridiaceae;g__Clostridium_sensu_stricto_3;s__Clostridiaceae_bacterium
OTU_455	8	83	0	9	0	4	2	26	k__Bacteria;p__Cyanobacteria;c__Cyanobacteriia;o__Chloroplast;f__Chloroplast;g__Chloroplast	12	7	3	8	225	16	0	0	0	22	3	0	0	0	0	12	0	0	2	0	2	0	12	66	k__Bacteria;p__Cyanobacteria;c__Cyanobacteriia;o__Chloroplast;f__Chloroplast;g__Chloroplast
OTU_456	11	88	0	0	0	5	0	1	k__Bacteria;p__Cyanobacteria;c__Cyanobacteriia;o__Chloroplast;f__Chloroplast;g__Chloroplast	15	9	8	5	253	6	0	0	0	0	0	0	0	0	0	13	0	0	0	0	0	0	1	0	k__Bacteria;p__Cyanobacteria;c__Cyanobacteriia;o__Chloroplast;f__Chloroplast;g__Chloroplast
OTU_457	0	0	22	0	0	2	72	12	k__Bacteria;p__Proteobacteria;c__Gammaproteobacteria;o__Burkholderiales;f__Nitrosomonadaceae;g__MND1;s__	0	0	0	0	0	0	14	45	6	0	0	0	0	0	0	0	0	5	70	103	43	3	7	25	k__Bacteria;p__Proteobacteria;c__Gammaproteobacteria;o__Burkholderiales;f__Nitrosomonadaceae;g__MND1;s__
OTU_458	6	17	3	0	6	2	13	93	k__Bacteria;p__Proteobacteria;c__Alphaproteobacteria;o__Acetobacterales;f__Acetobacteraceae;g__Roseomonas	8	7	1	41	3	7	3	3	3	0	0	0	2	0	16	0	0	4	7	29	3	266	0	13	k__Bacteria;p__Proteobacteria;c__Alphaproteobacteria;o__Acetobacterales;f__Acetobacteraceae;g__Roseomonas
OTU_459	1	0	25	5	2	2	63	5	k__Bacteria;p__Actinobacteriota;c__Actinobacteria;o__Frankiales;f__Sporichthyaceae;g__hgcI_clade;s__Candidatus_Planktophila	0	2	0	0	0	0	6	69	0	3	6	6	0	0	5	0	0	4	9	176	3	1	3	9	k__Bacteria;p__Actinobacteriota;c__Actinobacteria;o__Frankiales;f__Sporichthyaceae;g__hgcI_clade;s__Candidatus_Planktophila
OTU_460	7	2	0	0	3	0	0	0	k__Bacteria;p__Proteobacteria;c__Gammaproteobacteria;o__Burkholderiales	13	7	1	0	3	1	0	0	0	0	0	0	0	8	0	0	0	0	0	0	0	0	0	0	k__Bacteria;p__Proteobacteria;c__Gammaproteobacteria;o__Burkholderiales
OTU_461	0	0	10	2	4	4	0	0	k__Bacteria;p__Bacteroidota;c__Bacteroidia;o__Sphingobacteriales;f__Sphingobacteriaceae;g__Pedobacter	0	0	0	0	0	0	22	6	2	2	1	2	1	3	6	1	5	6	0	0	0	0	0	0	k__Bacteria;p__Bacteroidota;c__Bacteroidia;o__Sphingobacteriales;f__Sphingobacteriaceae;g__Pedobacter
OTU_462	0	1	7	147	2	3	0	2	k__Bacteria;p__Bacteroidota;c__Bacteroidia;o__Bacteroidales;f__Bacteroidaceae;g__Bacteroides;s__Bacteroides_fragilis	0	0	0	1	0	0	14	4	3	434	2	3	0	3	3	3	6	0	0	0	0	0	5	0	k__Bacteria;p__Bacteroidota;c__Bacteroidia;o__Bacteroidales;f__Bacteroidaceae;g__Bacteroides;s__Bacteroides_fragilis
OTU_463	1	0	14	0	0	0	118	3	k__Bacteria;p__Dependentiae;c__Babeliae;o__Babeliales;f__Babeliales;g__Babeliales;s__	0	1	0	0	0	0	0	40	2	0	0	0	0	0	0	0	0	0	6	275	72	0	4	3	k__Bacteria;p__Dependentiae;c__Babeliae;o__Babeliales;f__Babeliales;g__Babeliales;s__
OTU_464	2	0	4	1	1	0	82	65	k__Bacteria;p__Planctomycetota;c__Planctomycetes;o__Gemmatales;f__Gemmataceae;g__Fimbriiglobus;s__Gemmata_sp.	4	0	0	0	0	0	1	11	0	0	0	2	1	0	0	0	0	0	5	203	36	5	26	162	k__Bacteria;p__Planctomycetota;c__Planctomycetes;o__Gemmatales;f__Gemmataceae;g__Fimbriiglobus;s__Gemmata_sp.
OTU_465	84	4	2	2	1	0	19	16	k__Bacteria;p__Bacteroidota;c__Bacteroidia;o__Cytophagales;f__Spirosomaceae;g__Pseudarcicella;s__	46	194	10	4	2	6	0	4	0	0	1	3	0	0	2	0	0	0	12	37	6	3	36	7	k__Bacteria;p__Bacteroidota;c__Bacteroidia;o__Cytophagales;f__Spirosomaceae;g__Pseudarcicella;s__
OTU_466	0	0	26	0	0	4	46	6	k__Bacteria;p__Proteobacteria;c__Alphaproteobacteria;o__Rickettsiales;f__Rickettsiaceae	0	0	0	0	0	0	0	57	19	0	0	0	0	0	0	0	0	10	13	83	42	0	9	8	k__Bacteria;p__Proteobacteria;c__Alphaproteobacteria;o__Rickettsiales;f__Rickettsiaceae
OTU_467	6	0	0	50	0	0	0	0	Unknown	7	2	8	0	0	0	0	0	0	149	1	0	0	0	0	0	0	0	0	0	0	0	0	0	Unknown
OTU_468	1	0	0	88	0	0	0	0	k__Bacteria;p__Bacteroidota;c__Bacteroidia;o__Bacteroidales;f__Tannerellaceae;g__Parabacteroides;s__Parabacteroides_sp.	1	0	0	0	0	0	0	0	0	262	2	0	0	0	0	0	0	0	0	0	0	0	0	0	k__Bacteria;p__Bacteroidota;c__Bacteroidia;o__Bacteroidales;f__Tannerellaceae;g__Parabacteroides;s__Parabacteroides_sp.
OTU_469	0	1	41	1	0	0	21	0	k__Bacteria;p__Campilobacterota;c__Campylobacteria;o__Campylobacterales;f__Sulfurospirillaceae;g__Sulfurospirillum;s__	0	0	0	0	0	3	123	0	0	0	0	1	0	0	0	0	0	0	61	0	0	0	0	0	k__Bacteria;p__Campilobacterota;c__Campylobacteria;o__Campylobacterales;f__Sulfurospirillaceae;g__Sulfurospirillum;s__
OTU_470	1	0	13	46	6	5	1	4	k__Bacteria;p__Actinobacteriota;c__Coriobacteriia;o__Coriobacteriales;f__Coriobacteriaceae;g__Collinsella	0	0	3	0	0	0	22	10	6	121	9	6	7	6	3	2	10	1	0	1	0	0	11	0	k__Bacteria;p__Actinobacteriota;c__Coriobacteriia;o__Coriobacteriales;f__Coriobacteriaceae;g__Collinsella
OTU_471	33	1	18	153	19	9	1	22	k__Bacteria;p__Firmicutes;c__Bacilli;o__Lactobacillales;f__Streptococcaceae;g__Streptococcus	32	34	32	1	1	0	36	12	4	409	33	15	45	6	4	2	15	10	3	0	0	58	4	4	k__Bacteria;p__Firmicutes;c__Bacilli;o__Lactobacillales;f__Streptococcaceae;g__Streptococcus
OTU_472	0	0	6	2	3	7	0	0	k__Bacteria;p__Proteobacteria;c__Alphaproteobacteria;o__Rhizobiales;f__Devosiaceae;g__Pelagibacterium;s__	0	0	0	0	0	0	3	12	1	3	3	0	0	5	3	1	4	15	0	0	0	0	0	0	k__Bacteria;p__Proteobacteria;c__Alphaproteobacteria;o__Rhizobiales;f__Devosiaceae;g__Pelagibacterium;s__
OTU_473	0	0	0	0	0	0	0	76	k__Bacteria;p__Firmicutes;c__Bacilli;o__Mycoplasmatales;f__Mycoplasmataceae;g__Mycoplasma;s__Mycoplasma_moatsii	0	0	0	0	0	0	0	0	0	0	0	0	0	0	0	0	0	0	0	0	0	227	0	0	k__Bacteria;p__Firmicutes;c__Bacilli;o__Mycoplasmatales;f__Mycoplasmataceae;g__Mycoplasma;s__Mycoplasma_moatsii
OTU_474	8	1	33	1	0	4	108	33	k__Bacteria;p__Actinobacteriota;c__Actinobacteria;o__Frankiales;f__Nakamurellaceae;g__Nakamurella	10	2	12	0	0	1	4	89	4	0	2	0	0	0	0	0	1	10	36	258	28	29	12	58	k__Bacteria;p__Actinobacteriota;c__Actinobacteria;o__Frankiales;f__Nakamurellaceae;g__Nakamurella
OTU_475	0	0	16	0	0	3	49	6	k__Bacteria;p__Proteobacteria;c__Gammaproteobacteria;o__Steroidobacterales;f__Steroidobacteraceae;g__;s__Hypsibius_dujardini	0	0	0	0	0	0	0	47	0	0	0	0	0	0	0	0	0	9	2	134	9	0	5	11	k__Bacteria;p__Proteobacteria;c__Gammaproteobacteria;o__Steroidobacterales;f__Steroidobacteraceae;g__;s__Hypsibius_dujardini
OTU_476	14	6	5	3	4	2	22	25	k__Bacteria;p__Proteobacteria;c__Alphaproteobacteria;o__Acetobacterales;f__Acetobacteraceae;g__;s__Paracraurococcus_sp.	13	19	8	2	10	4	2	12	1	3	4	0	1	8	1	1	0	4	8	55	2	53	19	2	k__Bacteria;p__Proteobacteria;c__Alphaproteobacteria;o__Acetobacterales;f__Acetobacteraceae;g__;s__Paracraurococcus_sp.
OTU_477	4	1	0	14	2	5	12	76	k__Bacteria;p__Firmicutes;c__Clostridia;o__Christensenellales;f__Christensenellaceae;g__Christensenellaceae_R-7_group	7	1	4	0	0	2	0	0	0	38	2	0	0	6	0	0	0	14	14	12	10	0	173	53	k__Bacteria;p__Firmicutes;c__Clostridia;o__Christensenellales;f__Christensenellaceae;g__Christensenellaceae_R-7_group
OTU_478	8	1	2	8	2	1	5	87	k__Bacteria;p__Bdellovibrionota;c__Oligoflexia;o__0319-6G20;f__0319-6G20;g__0319-6G20;s__	23	0	1	2	0	0	0	0	4	1	19	2	4	0	2	0	0	3	3	3	7	11	39	211	k__Bacteria;p__Bdellovibrionota;c__Oligoflexia;o__0319-6G20;f__0319-6G20;g__0319-6G20;s__
OTU_479	1	1	17	1	0	2	58	9	k__Bacteria;p__Actinobacteriota;c__Acidimicrobiia;o__Microtrichales;f__;g__;s__	1	0	1	0	2	0	29	17	4	0	0	1	0	0	0	0	0	5	96	61	17	0	6	19	k__Bacteria;p__Actinobacteriota;c__Acidimicrobiia;o__Microtrichales;f__;g__;s__
OTU_480	6	25	1	4	0	52	0	0	k__Bacteria;p__Firmicutes;c__Limnochordia;o__MBA03;f__MBA03;g__MBA03;s__	0	17	0	0	0	75	2	0	0	0	0	12	0	0	0	0	154	0	0	0	0	0	0	0	k__Bacteria;p__Firmicutes;c__Limnochordia;o__MBA03;f__MBA03;g__MBA03;s__
OTU_481	1	0	0	1	0	0	0	1	k__Bacteria;p__Deinococcota;c__Deinococci;o__Thermales;f__Thermaceae;g__Thermus;s__Thermus_scotoductus	1	0	0	0	0	0	0	0	0	0	1	0	0	0	0	0	0	0	0	0	0	0	0	3	k__Bacteria;p__Deinococcota;c__Deinococci;o__Thermales;f__Thermaceae;g__Thermus;s__Thermus_scotoductus
OTU_482	22	2	4	2	1	1	22	34	k__Bacteria;p__Bacteroidota;c__Bacteroidia;o__Sphingobacteriales;f__NS11-12_marine_group;g__NS11-12_marine_group;s__	17	43	4	3	0	3	11	0	0	0	4	0	1	0	2	0	0	2	51	11	4	6	9	85	k__Bacteria;p__Bacteroidota;c__Bacteroidia;o__Sphingobacteriales;f__NS11-12_marine_group;g__NS11-12_marine_group;s__
OTU_483	4	4	4	2	2	3	29	80	k__Bacteria;p__Chloroflexi;c__Anaerolineae;o__SJA-15;f__SJA-15;g__SJA-15;s__	7	1	2	3	5	3	0	2	9	0	4	1	2	0	2	1	1	5	8	9	68	209	4	26	k__Bacteria;p__Chloroflexi;c__Anaerolineae;o__SJA-15;f__SJA-15;g__SJA-15;s__
OTU_484	1	1	12	0	0	3	62	11	k__Bacteria;p__Proteobacteria;c__Alphaproteobacteria;o__;f__;g__;s__bacterium_enrichment	1	0	0	0	0	1	2	3	29	0	0	0	0	0	0	0	0	7	20	36	130	7	10	14	k__Bacteria;p__Proteobacteria;c__Alphaproteobacteria;o__;f__;g__;s__bacterium_enrichment
OTU_485	10	1	18	2	0	6	55	10	k__Bacteria;p__Actinobacteriota;c__Thermoleophilia;o__Solirubrobacterales;f__Solirubrobacteraceae;g__;s__Phytoplasma_sp.	17	12	0	0	0	1	38	11	5	0	3	3	0	0	0	3	2	13	108	33	22	0	3	26	k__Bacteria;p__Actinobacteriota;c__Thermoleophilia;o__Solirubrobacterales;f__Solirubrobacteraceae;g__;s__Phytoplasma_sp.
OTU_486	10	34	0	5	0	61	0	0	k__Bacteria;p__Firmicutes;c__Clostridia;o__Clostridia;f__Hungateiclostridiaceae	0	30	0	0	0	100	0	0	0	0	0	15	0	0	0	0	183	0	0	0	0	0	0	0	k__Bacteria;p__Firmicutes;c__Clostridia;o__Clostridia;f__Hungateiclostridiaceae
OTU_487	6	0	1	6	2	1	14	48	k__Bacteria;p__Myxococcota;c__Polyangia;o__Polyangiales;f__Sandaracinaceae;g__	17	0	0	0	0	0	0	1	0	4	12	0	6	0	0	0	0	1	12	19	9	5	17	122	k__Bacteria;p__Myxococcota;c__Polyangia;o__Polyangiales;f__Sandaracinaceae;g__
OTU_488	27	0	29	47	1	0	0	1	k__Bacteria	27	29	25	0	0	0	23	44	19	44	64	33	1	0	0	0	0	0	0	0	0	0	0	1	k__Bacteria
OTU_489	40	1	340	546	61	46	4	17	k__Bacteria;p__Proteobacteria;c__Gammaproteobacteria;o__Enterobacterales;f__Enterobacteriaceae;g__Kosakonia	48	39	31	0	1	2	367	610	42	529	567	540	90	25	67	48	47	43	2	8	0	5	11	33	k__Bacteria;p__Proteobacteria;c__Gammaproteobacteria;o__Enterobacterales;f__Enterobacteriaceae;g__Kosakonia
OTU_490	1	0	3	0	0	0	57	1	k__Bacteria;p__Bacteroidota;c__Bacteroidia;o__Chitinophagales;f__Saprospiraceae;g__;s__	0	0	1	0	0	0	0	0	8	0	0	0	0	0	0	0	0	0	8	1	161	0	1	2	k__Bacteria;p__Bacteroidota;c__Bacteroidia;o__Chitinophagales;f__Saprospiraceae;g__;s__
OTU_491	12	46	0	0	14	1	1	6	k__Bacteria;p__Proteobacteria;c__Gammaproteobacteria;o__Oceanospirillales;f__Alcanivoracaceae;g__Ketobacter	20	5	9	116	13	7	0	0	0	0	0	0	0	0	41	0	0	3	0	1	1	17	0	0	k__Bacteria;p__Proteobacteria;c__Gammaproteobacteria;o__Oceanospirillales;f__Alcanivoracaceae;g__Ketobacter
OTU_492	7	15	1	9	0	61	1	1	k__Bacteria;p__Firmicutes;c__Clostridia;o__Lachnospirales;f__Lachnospiraceae	0	20	0	0	0	45	0	0	1	9	0	16	0	0	0	0	180	2	0	0	1	1	1	1	k__Bacteria;p__Firmicutes;c__Clostridia;o__Lachnospirales;f__Lachnospiraceae
OTU_493	0	0	6	3	3	8	0	0	k__Bacteria;p__Bacteroidota;c__Bacteroidia;o__Sphingobacteriales;f__Sphingobacteriaceae;g__Pedobacter	0	0	0	0	0	0	17	1	0	4	2	1	5	0	4	1	3	18	0	0	0	0	0	0	k__Bacteria;p__Bacteroidota;c__Bacteroidia;o__Sphingobacteriales;f__Sphingobacteriaceae;g__Pedobacter
OTU_494	4	2	16	3	6	8	33	44	k__Bacteria;p__Proteobacteria;c__Alphaproteobacteria;o__Rhizobiales;f__Xanthobacteraceae;g__Rhodopseudomonas;s__Rhodopseudomonas_palustris	8	3	0	0	0	4	34	1	11	4	2	3	3	11	4	3	2	19	38	3	58	113	7	12	k__Bacteria;p__Proteobacteria;c__Alphaproteobacteria;o__Rhizobiales;f__Xanthobacteraceae;g__Rhodopseudomonas;s__Rhodopseudomonas_palustris
OTU_495	4	1	5	5	0	2	18	39	k__Bacteria;p__Actinobacteriota;c__Acidimicrobiia;o__Microtrichales;f__Ilumatobacteraceae;g__;s__	12	0	0	1	0	0	1	8	6	7	5	1	0	0	0	0	0	6	19	10	24	4	46	65	k__Bacteria;p__Actinobacteriota;c__Acidimicrobiia;o__Microtrichales;f__Ilumatobacteraceae;g__;s__
OTU_496	1	24	0	1	0	34	0	0	k__Bacteria;p__Firmicutes;c__Clostridia;o__Clostridia_vadinBB60_group;f__Clostridia_vadinBB60_group;g__Clostridia_vadinBB60_group;s__	0	3	0	0	0	72	0	0	0	0	0	2	0	0	0	0	102	0	0	0	0	0	0	0	k__Bacteria;p__Firmicutes;c__Clostridia;o__Clostridia_vadinBB60_group;f__Clostridia_vadinBB60_group;g__Clostridia_vadinBB60_group;s__
OTU_497	0	0	17	0	0	2	66	5	k__Bacteria;p__Myxococcota;c__Polyangia;o__Polyangiales;f__Polyangiaceae;g__Pajaroellobacter;s__	0	0	0	0	0	0	48	2	0	0	0	0	0	0	0	0	0	4	156	20	20	0	3	10	k__Bacteria;p__Myxococcota;c__Polyangia;o__Polyangiales;f__Polyangiaceae;g__Pajaroellobacter;s__
OTU_498	2	0	0	106	0	1	0	0	k__Bacteria;p__Bacteroidota;c__Bacteroidia;o__Bacteroidales;f__Prevotellaceae	6	0	0	0	0	0	0	0	0	285	31	1	0	0	0	1	0	0	0	0	0	0	0	0	k__Bacteria;p__Bacteroidota;c__Bacteroidia;o__Bacteroidales;f__Prevotellaceae
OTU_499	0	0	1	1	58	0	0	0	Unknown	0	0	0	0	0	0	1	0	0	0	1	0	0	1	173	0	0	0	0	0	0	0	0	0	Unknown
OTU_500	3	7	18	0	1	1	23	11	k__Bacteria;p__Proteobacteria;c__Alphaproteobacteria;o__Tistrellales;f__Geminicoccaceae;g__Geminicoccus;s__	3	2	2	16	2	1	1	51	0	0	0	0	0	0	3	0	0	1	6	58	5	18	7	8	k__Bacteria;p__Proteobacteria;c__Alphaproteobacteria;o__Tistrellales;f__Geminicoccaceae;g__Geminicoccus;s__
OTU_501	0	0	21	0	0	4	36	3	k__Bacteria;p__Proteobacteria;c__Alphaproteobacteria;o__Ferrovibrionales;f__Ferrovibrionaceae;g__Ferrovibrio;s__	0	0	0	0	0	0	63	0	0	0	0	0	0	0	0	0	0	11	95	3	10	0	4	3	k__Bacteria;p__Proteobacteria;c__Alphaproteobacteria;o__Ferrovibrionales;f__Ferrovibrionaceae;g__Ferrovibrio;s__
OTU_502	64	7	3	2	1	1	12	6	k__Bacteria;p__Bacteroidota;c__Bacteroidia;o__Flavobacteriales;f__Crocinitomicaceae;g__Fluviicola;s__	53	132	7	12	1	7	0	1	6	0	1	3	0	1	0	1	0	2	12	1	23	14	0	4	k__Bacteria;p__Bacteroidota;c__Bacteroidia;o__Flavobacteriales;f__Crocinitomicaceae;g__Fluviicola;s__
OTU_503	2	0	19	0	1	5	46	9	k__Bacteria;p__Myxococcota;c__Polyangia;o__Blfdi19;f__Blfdi19;g__Blfdi19;s__	0	0	6	0	0	0	0	56	0	0	0	0	3	0	0	1	0	12	12	114	10	0	11	16	k__Bacteria;p__Myxococcota;c__Polyangia;o__Blfdi19;f__Blfdi19;g__Blfdi19;s__
OTU_504	0	0	12	0	0	1	61	3	k__Bacteria;p__Bacteroidota;c__Kapabacteria;o__Kapabacteriales;f__Kapabacteriales;g__Kapabacteriales;s__Candidatus_Kapabacteria	0	0	0	0	0	0	33	2	0	0	0	0	0	0	0	0	0	2	163	14	6	0	0	9	k__Bacteria;p__Bacteroidota;c__Kapabacteria;o__Kapabacteriales;f__Kapabacteriales;g__Kapabacteriales;s__Candidatus_Kapabacteria
OTU_505	25	6	4	22	10	1	4	1	k__Bacteria;p__Proteobacteria;c__Gammaproteobacteria;o__Pseudomonadales;f__Moraxellaceae;g__Perlucidibaca;s__	13	2	58	3	2	11	1	0	10	65	1	0	26	0	3	2	0	1	2	0	8	0	0	1	k__Bacteria;p__Proteobacteria;c__Gammaproteobacteria;o__Pseudomonadales;f__Moraxellaceae;g__Perlucidibaca;s__
OTU_507	0	0	8	0	0	2	62	3	k__Bacteria;p__Myxococcota;c__Polyangia;o__Polyangiales;f__BIrii41;g__BIrii41;s__	0	0	0	0	0	0	0	0	24	0	0	0	0	0	0	0	0	4	8	4	173	0	5	3	k__Bacteria;p__Myxococcota;c__Polyangia;o__Polyangiales;f__BIrii41;g__BIrii41;s__
OTU_508	13	3	29	4	3	11	150	39	k__Bacteria;p__Proteobacteria;c__Alphaproteobacteria;o__Rhizobiales;f__A0839;g__A0839	7	0	32	1	2	5	3	2	81	7	1	2	9	0	0	5	0	26	30	20	399	50	20	45	k__Bacteria;p__Proteobacteria;c__Alphaproteobacteria;o__Rhizobiales;f__A0839;g__A0839
OTU_509	59	7	0	1	0	0	1	3	k__Bacteria;p__Bacteroidota;c__Bacteroidia;o__Chitinophagales;f__Chitinophagaceae;g__Flavisolibacter	143	30	2	10	2	9	0	0	0	0	3	0	0	0	0	0	0	0	0	2	0	2	0	5	k__Bacteria;p__Bacteroidota;c__Bacteroidia;o__Chitinophagales;f__Chitinophagaceae;g__Flavisolibacter
OTU_510	0	0	22	0	0	1	30	7	k__Bacteria;p__Proteobacteria;c__Alphaproteobacteria;o__Ferrovibrionales;f__Ferrovibrionales;g__Taonella;s__	0	0	0	0	0	0	0	60	5	0	0	0	0	0	0	0	0	1	14	59	17	7	4	9	k__Bacteria;p__Proteobacteria;c__Alphaproteobacteria;o__Ferrovibrionales;f__Ferrovibrionales;g__Taonella;s__
OTU_511	0	0	2	0	0	0	52	1	k__Bacteria;p__Planctomycetota;c__Planctomycetes;o__Gemmatales;f__Gemmataceae;g__Fimbriiglobus;s__	0	0	0	0	0	0	0	4	2	0	0	0	0	0	0	0	0	0	4	145	7	0	1	2	k__Bacteria;p__Planctomycetota;c__Planctomycetes;o__Gemmatales;f__Gemmataceae;g__Fimbriiglobus;s__
OTU_512	11	33	1	10	1	7	6	154	k__Bacteria;p__Firmicutes;c__Bacilli;o__Bacillales;f__Bacillaceae;g__Bacillus;s__Bacillus_indicus	21	4	6	1	92	5	3	0	0	25	4	1	0	0	1	17	0	4	4	7	5	0	366	95	k__Bacteria;p__Firmicutes;c__Bacilli;o__Bacillales;f__Bacillaceae;g__Bacillus;s__Bacillus_indicus
OTU_513	0	0	0	59	0	0	0	0	k__Bacteria;p__Firmicutes;c__Clostridia;o__Oscillospirales;f__Ruminococcaceae;g__Caproiciproducens;s__	0	0	0	0	0	0	0	0	0	175	0	0	0	0	0	0	0	0	0	0	0	0	0	0	k__Bacteria;p__Firmicutes;c__Clostridia;o__Oscillospirales;f__Ruminococcaceae;g__Caproiciproducens;s__
OTU_514	4	5	7	4	1	3	19	28	k__Bacteria;p__Proteobacteria;c__Alphaproteobacteria;o__Tistrellales;f__Geminicoccaceae;g__Candidatus_Alysiosphaera;s__	6	1	4	0	0	15	0	1	19	3	7	0	1	0	0	0	2	7	7	10	38	0	23	59	k__Bacteria;p__Proteobacteria;c__Alphaproteobacteria;o__Tistrellales;f__Geminicoccaceae;g__Candidatus_Alysiosphaera;s__
OTU_515	0	1	4	5	5	9	0	1	k__Bacteria;p__Proteobacteria;c__Alphaproteobacteria;o__Caulobacterales;f__Caulobacteraceae;g__Asticcacaulis;s__	0	0	0	1	0	0	4	6	2	8	4	3	2	3	8	4	6	15	0	0	0	2	0	0	k__Bacteria;p__Proteobacteria;c__Alphaproteobacteria;o__Caulobacterales;f__Caulobacteraceae;g__Asticcacaulis;s__
OTU_516	0	0	2	1	0	1	46	6	k__Bacteria;p__Verrucomicrobiota;c__Verrucomicrobiae;o__Pedosphaerales;f__Pedosphaeraceae;g__Oikopleura;s__	0	0	0	0	0	0	0	0	4	0	2	0	0	0	0	0	0	3	1	2	133	10	3	4	k__Bacteria;p__Verrucomicrobiota;c__Verrucomicrobiae;o__Pedosphaerales;f__Pedosphaeraceae;g__Oikopleura;s__
OTU_517	3	35	4	3	0	17	2	0	k__Bacteria;p__Bacteroidota;c__Bacteroidia;o__Bacteroidales;f__Dysgonomonadaceae;g__Fermentimonas;s__	0	8	1	0	0	103	11	0	0	1	0	6	0	0	0	0	50	0	6	0	0	0	0	0	k__Bacteria;p__Bacteroidota;c__Bacteroidia;o__Bacteroidales;f__Dysgonomonadaceae;g__Fermentimonas;s__
OTU_518	0	0	6	0	0	2	61	4	k__Bacteria;p__Myxococcota;c__Polyangia;o__Polyangiales;f__Sandaracinaceae;g__;s__	0	0	0	0	0	0	0	0	17	0	0	0	0	0	0	0	0	5	9	1	173	0	3	7	k__Bacteria;p__Myxococcota;c__Polyangia;o__Polyangiales;f__Sandaracinaceae;g__;s__
OTU_519	1	1	2	166	1	3	0	0	k__Bacteria;p__Bacteroidota;c__Bacteroidia;o__Bacteroidales;f__Bacteroidaceae;g__Bacteroides;s__Bacteroides_acidifaciens	0	0	1	1	0	0	4	0	0	496	1	0	1	0	2	1	7	0	0	0	0	0	0	0	k__Bacteria;p__Bacteroidota;c__Bacteroidia;o__Bacteroidales;f__Bacteroidaceae;g__Bacteroides;s__Bacteroides_acidifaciens
OTU_520	0	0	11	0	0	1	56	4	k__Bacteria;p__Bacteroidota;c__Bacteroidia;o__Cytophagales;f__Amoebophilaceae;g__Candidatus_Amoebophilus	0	0	0	0	0	0	33	0	0	0	0	0	0	0	0	0	0	1	152	8	7	0	3	7	k__Bacteria;p__Bacteroidota;c__Bacteroidia;o__Cytophagales;f__Amoebophilaceae;g__Candidatus_Amoebophilus
OTU_521	55	4	2	2	3	0	4	2	k__Bacteria;p__Proteobacteria;c__Gammaproteobacteria;o__Burkholderiales;f__Oxalobacteraceae;g__Undibacterium	80	65	18	1	2	7	4	0	0	0	4	1	7	0	0	0	0	0	4	6	2	1	0	5	k__Bacteria;p__Proteobacteria;c__Gammaproteobacteria;o__Burkholderiales;f__Oxalobacteraceae;g__Undibacterium
OTU_522	0	0	0	1	45	20	0	0	Unknown	0	0	0	0	0	0	0	0	0	2	0	0	18	0	116	11	23	26	0	0	0	0	0	0	Unknown
OTU_523	147	59	11	9	15	6	27	24	k__Bacteria;p__Actinobacteriota;c__Actinobacteria;o__Corynebacteriales;f__Mycobacteriaceae;g__Mycobacterium;s__Mycobacterium_neoaurum	257	136	46	115	15	46	9	16	7	1	20	4	6	0	39	2	4	12	29	11	40	34	3	35	k__Bacteria;p__Actinobacteriota;c__Actinobacteria;o__Corynebacteriales;f__Mycobacteriaceae;g__Mycobacterium;s__Mycobacterium_neoaurum
OTU_524	0	0	38	0	0	0	10	0	k__Bacteria;p__Cloacimonadota;c__Cloacimonadia;o__Cloacimonadales	0	0	0	0	0	0	113	0	0	0	0	0	0	0	0	0	0	0	30	0	0	0	0	0	k__Bacteria;p__Cloacimonadota;c__Cloacimonadia;o__Cloacimonadales
OTU_525	2	20	0	3	0	37	0	0	k__Bacteria;p__Firmicutes;c__Clostridia;o__Clostridia;f__Hungateiclostridiaceae;g__HN-HF0106;s__	0	6	0	0	0	60	0	0	0	0	0	7	0	0	0	1	108	0	0	0	0	0	0	0	k__Bacteria;p__Firmicutes;c__Clostridia;o__Clostridia;f__Hungateiclostridiaceae;g__HN-HF0106;s__
OTU_526	0	0	2	0	0	1	54	0	k__Bacteria;p__Planctomycetota;c__Phycisphaerae;o__Phycisphaerales;f__Phycisphaeraceae;g__SM1A02;s__	0	0	0	0	0	0	0	0	6	0	0	0	0	0	0	0	1	0	0	2	160	0	0	0	k__Bacteria;p__Planctomycetota;c__Phycisphaerae;o__Phycisphaerales;f__Phycisphaeraceae;g__SM1A02;s__
OTU_527	2	0	0	8	0	1	7	28	k__Bacteria;p__Proteobacteria;c__Alphaproteobacteria;o__Rickettsiales;f__SM2D12;g__SM2D12;s__	5	0	0	0	0	0	0	0	0	20	4	0	0	0	0	0	0	2	9	3	9	0	72	12	k__Bacteria;p__Proteobacteria;c__Alphaproteobacteria;o__Rickettsiales;f__SM2D12;g__SM2D12;s__
OTU_528	21	0	11	15	1	0	0	1	k__Bacteria	9	13	41	0	0	0	6	15	10	14	14	16	1	0	0	0	0	0	0	0	0	0	1	0	k__Bacteria
OTU_529	0	7	0	0	39	2	0	0	Unknown	0	0	0	21	0	0	0	0	0	0	0	0	55	0	62	0	4	0	0	0	0	0	0	0	Unknown
OTU_530	0	0	2	62	1	1	0	1	k__Bacteria;p__Firmicutes;c__Clostridia;o__Lachnospirales;f__Lachnospiraceae;g__Lachnoclostridium	0	0	0	0	0	0	4	0	0	180	1	4	0	0	1	0	1	0	0	0	0	0	2	0	k__Bacteria;p__Firmicutes;c__Clostridia;o__Lachnospirales;f__Lachnospiraceae;g__Lachnoclostridium
OTU_531	0	2	5	0	0	1	81	18	k__Bacteria;p__Bacteroidota;c__Bacteroidia;o__Sphingobacteriales;f__env.OPS_17;g__env.OPS_17;s__	0	0	0	1	0	5	13	0	0	0	0	0	0	0	0	0	0	3	223	13	7	0	7	45	k__Bacteria;p__Bacteroidota;c__Bacteroidia;o__Sphingobacteriales;f__env.OPS_17;g__env.OPS_17;s__
OTU_532	0	0	0	74	0	0	0	0	k__Bacteria;p__Marinimicrobia_(SAR406_clade);c__Marinimicrobia_(SAR406_clade);o__Marinimicrobia_(SAR406_clade);f__Marinimicrobia_(SAR406_clade);g__Marinimicrobia_(SAR406_clade)	0	0	0	0	0	0	0	0	0	220	0	0	0	0	0	0	0	0	0	0	0	0	0	0	k__Bacteria;p__Marinimicrobia_(SAR406_clade);c__Marinimicrobia_(SAR406_clade);o__Marinimicrobia_(SAR406_clade);f__Marinimicrobia_(SAR406_clade);g__Marinimicrobia_(SAR406_clade)
OTU_533	6	17	6	2	2	7	13	29	k__Bacteria;p__Bacteroidota;c__Bacteroidia;o__Cytophagales;f__Spirosomaceae;g__Arsenicibacter	2	12	2	1	45	3	14	1	1	6	0	0	1	0	3	5	2	14	26	0	11	15	61	10	k__Bacteria;p__Bacteroidota;c__Bacteroidia;o__Cytophagales;f__Spirosomaceae;g__Arsenicibacter
OTU_534	9	15	0	4	1	5	3	15	k__Bacteria;p__Firmicutes;c__Clostridia;o__Clostridiales;f__Clostridiaceae;g__Clostridium_sensu_stricto_11;s__Clostridium_acetobutylicum	15	5	5	2	1	41	0	0	0	1	9	0	2	0	0	0	13	0	4	3	1	0	6	39	k__Bacteria;p__Firmicutes;c__Clostridia;o__Clostridiales;f__Clostridiaceae;g__Clostridium_sensu_stricto_11;s__Clostridium_acetobutylicum
OTU_535	2	0	4	0	0	1	72	3	k__Bacteria;p__Bacteroidota;c__Bacteroidia;o__Sphingobacteriales;f__env.OPS_17;g__env.OPS_17;s__	3	1	0	0	0	0	11	0	0	0	0	0	0	0	0	0	0	1	208	1	7	0	2	5	k__Bacteria;p__Bacteroidota;c__Bacteroidia;o__Sphingobacteriales;f__env.OPS_17;g__env.OPS_17;s__
OTU_536	5	1	61	5	6	14	194	65	k__Bacteria;p__Proteobacteria;c__Alphaproteobacteria;o__Caulobacterales;f__Caulobacteraceae;g__Caulobacter;s__	9	4	2	1	0	2	109	30	42	2	12	1	5	3	9	0	5	37	295	72	214	86	44	64	k__Bacteria;p__Proteobacteria;c__Alphaproteobacteria;o__Caulobacterales;f__Caulobacteraceae;g__Caulobacter;s__
OTU_537	0	0	0	106	0	0	0	0	k__Bacteria;p__Firmicutes;c__Negativicutes;o__Veillonellales-Selenomonadales;f__Veillonellaceae;g__Allisonella;s__	0	0	0	0	0	0	0	0	0	316	0	0	0	0	0	0	0	0	0	0	0	0	0	0	k__Bacteria;p__Firmicutes;c__Negativicutes;o__Veillonellales-Selenomonadales;f__Veillonellaceae;g__Allisonella;s__
OTU_538	0	0	3	39	0	0	0	0	Unknown	0	0	0	0	0	0	5	3	0	93	18	4	0	0	0	0	0	0	0	0	0	0	0	0	Unknown
OTU_539	1	16	0	1	47	64	0	0	Unknown	0	0	1	25	11	11	0	0	0	1	0	0	70	15	56	47	74	69	0	0	0	0	0	0	Unknown
OTU_540	1	1	9	0	2	2	24	22	k__Bacteria;p__Proteobacteria;c__Alphaproteobacteria;o__Caulobacterales;f__Hyphomonadaceae;g__Hirschia;s__	1	0	1	1	1	0	22	1	2	0	0	0	0	2	2	0	0	5	38	10	24	52	2	12	k__Bacteria;p__Proteobacteria;c__Alphaproteobacteria;o__Caulobacterales;f__Hyphomonadaceae;g__Hirschia;s__
OTU_541	2	7	1	2	1	1	4	51	k__Bacteria;p__Bacteroidota;c__Bacteroidia;o__Chitinophagales;f__Chitinophagaceae;g__Flavihumibacter;s__	3	1	0	0	20	1	1	0	0	5	0	0	0	0	3	1	0	2	6	1	4	0	99	53	k__Bacteria;p__Bacteroidota;c__Bacteroidia;o__Chitinophagales;f__Chitinophagaceae;g__Flavihumibacter;s__
OTU_542	0	0	2	0	0	0	69	4	k__Bacteria;p__Planctomycetota;c__Planctomycetes;o__Isosphaerales;f__Isosphaeraceae;g__Aquisphaera;s__	0	0	0	0	0	0	0	4	0	0	0	0	0	0	0	0	0	0	21	144	40	10	0	1	k__Bacteria;p__Planctomycetota;c__Planctomycetes;o__Isosphaerales;f__Isosphaeraceae;g__Aquisphaera;s__
OTU_543	0	22	11	0	0	26	7	0	k__Bacteria;p__Desulfobacterota;c__Desulfovibrionia;o__Desulfovibrionales;f__Desulfomicrobiaceae;g__Desulfomicrobium	0	0	0	0	0	64	32	0	0	0	0	0	0	0	0	0	76	0	21	0	0	0	0	0	k__Bacteria;p__Desulfobacterota;c__Desulfovibrionia;o__Desulfovibrionales;f__Desulfomicrobiaceae;g__Desulfomicrobium
OTU_544	3	8	3	1	2	4	0	0	k__Bacteria;p__Bacteroidota;c__Bacteroidia;o__Bacteroidales;f__Dysgonomonadaceae;g__Petrimonas;s__	2	3	4	5	0	18	7	0	0	1	0	0	0	6	0	0	10	0	0	0	0	0	0	0	k__Bacteria;p__Bacteroidota;c__Bacteroidia;o__Bacteroidales;f__Dysgonomonadaceae;g__Petrimonas;s__
OTU_545	2	1	5	20	3	3	0	1	k__Bacteria;p__Firmicutes;c__Bacilli;o__Lactobacillales;f__Lactobacillaceae;g__Lactobacillus;s__Lactobacillus_murinus	0	5	1	2	0	0	6	7	0	36	14	8	2	3	3	2	6	0	0	0	0	1	1	0	k__Bacteria;p__Firmicutes;c__Bacilli;o__Lactobacillales;f__Lactobacillaceae;g__Lactobacillus;s__Lactobacillus_murinus
OTU_546	1	2	6	0	0	1	51	31	k__Bacteria;p__Bacteroidota;c__Bacteroidia;o__Flavobacteriales;f__NS9_marine_group;g__NS9_marine_group;s__	1	0	0	5	0	0	0	0	16	0	0	0	0	0	0	0	0	2	13	20	119	71	3	18	k__Bacteria;p__Bacteroidota;c__Bacteroidia;o__Flavobacteriales;f__NS9_marine_group;g__NS9_marine_group;s__
OTU_547	4	0	8	68	6	4	0	2	k__Bacteria;p__Bacteroidota;c__Bacteroidia;o__Bacteroidales;f__Bacteroidaceae;g__Bacteroides;s__Bacteroides_plebeius	0	0	11	0	0	0	14	3	5	176	26	1	11	0	7	3	4	3	0	0	0	1	3	1	k__Bacteria;p__Bacteroidota;c__Bacteroidia;o__Bacteroidales;f__Bacteroidaceae;g__Bacteroides;s__Bacteroides_plebeius
OTU_548	33	7	6	3	0	0	23	3	k__Bacteria;p__Actinobacteriota;c__Actinobacteria;o__Corynebacteriales;f__Mycobacteriaceae;g__Mycobacterium	35	58	6	11	1	8	1	15	0	0	3	4	0	0	0	0	0	0	10	54	3	1	4	4	k__Bacteria;p__Actinobacteriota;c__Actinobacteria;o__Corynebacteriales;f__Mycobacteriaceae;g__Mycobacterium
OTU_549	0	0	10	0	0	3	48	6	k__Bacteria;p__Myxococcota;c__Polyangia;o__Haliangiales;f__Haliangiaceae;g__Haliangium;s__	0	0	0	0	0	0	0	0	28	0	0	0	0	0	0	0	0	7	4	6	132	0	6	11	k__Bacteria;p__Myxococcota;c__Polyangia;o__Haliangiales;f__Haliangiaceae;g__Haliangium;s__
OTU_550	17	2	1	6	1	1	6	17	k__Bacteria;p__Firmicutes;c__Clostridia;o__Clostridiales;f__Clostridiaceae;g__Clostridium_sensu_stricto_5;s__Clostridium_sp.	26	19	4	0	2	4	1	0	2	11	5	1	1	0	0	0	0	2	4	2	11	1	10	39	k__Bacteria;p__Firmicutes;c__Clostridia;o__Clostridiales;f__Clostridiaceae;g__Clostridium_sensu_stricto_5;s__Clostridium_sp.
OTU_551	2	1	4	240	3	3	2	2	k__Bacteria;p__Bacteroidota;c__Bacteroidia;o__Bacteroidales;f__Tannerellaceae;g__Parabacteroides;s__Parabacteroides_distasonis	0	0	4	0	0	2	11	1	0	709	8	2	4	1	3	0	3	5	2	3	0	0	2	2	k__Bacteria;p__Bacteroidota;c__Bacteroidia;o__Bacteroidales;f__Tannerellaceae;g__Parabacteroides;s__Parabacteroides_distasonis
OTU_552	490	320	1	8	92	0	0	3	k__Bacteria;p__Proteobacteria;c__Gammaproteobacteria;o__Burkholderiales;f__Rhodocyclaceae	443	281	746	871	42	47	0	0	2	0	8	14	96	0	180	0	0	0	0	0	0	0	0	7	k__Bacteria;p__Proteobacteria;c__Gammaproteobacteria;o__Burkholderiales;f__Rhodocyclaceae
OTU_553	0	10	0	0	5	23	0	1	k__Bacteria	0	0	0	2	19	7	0	0	0	0	0	0	10	2	2	11	9	47	0	0	0	0	0	2	k__Bacteria
OTU_554	0	0	0	63	0	0	0	0	k__Bacteria;p__Bacteroidota;c__Bacteroidia;o__Bacteroidales;f__Muribaculaceae;g__Muribaculaceae;s__	0	0	0	0	0	0	0	0	0	187	0	0	0	0	0	0	0	0	0	0	0	0	0	0	k__Bacteria;p__Bacteroidota;c__Bacteroidia;o__Bacteroidales;f__Muribaculaceae;g__Muribaculaceae;s__
OTU_555	1	14	0	0	36	39	0	0	Unknown	0	0	2	19	4	19	0	0	0	0	0	0	29	12	66	5	87	25	0	0	0	0	0	0	Unknown
OTU_556	0	2	0	0	0	0	1	51	k__Bacteria;p__Verrucomicrobiota;c__Verrucomicrobiae;o__Pedosphaerales;f__Pedosphaeraceae;g__;s__	0	0	0	4	0	0	0	0	0	0	0	0	0	0	0	0	0	0	0	0	3	149	0	4	k__Bacteria;p__Verrucomicrobiota;c__Verrucomicrobiae;o__Pedosphaerales;f__Pedosphaeraceae;g__;s__
OTU_557	1	2	52	1	0	0	32	0	k__Bacteria;p__Bacteroidota;c__Bacteroidia;o__Bacteroidales;f__Bacteroidetes_vadinHA17;g__Bacteroidetes_vadinHA17;s__	0	2	0	0	0	6	156	0	0	0	1	0	0	0	0	0	0	0	94	0	0	0	0	0	k__Bacteria;p__Bacteroidota;c__Bacteroidia;o__Bacteroidales;f__Bacteroidetes_vadinHA17;g__Bacteroidetes_vadinHA17;s__
OTU_558	8	2	16	0	1	1	31	3	k__Bacteria;p__Proteobacteria;c__Gammaproteobacteria;o__Pseudomonadales;f__Moraxellaceae;g__Cavicella	1	0	22	3	0	2	36	2	9	0	0	0	2	0	0	0	0	2	66	3	24	1	4	3	k__Bacteria;p__Proteobacteria;c__Gammaproteobacteria;o__Pseudomonadales;f__Moraxellaceae;g__Cavicella
OTU_559	2	4	0	0	2	0	0	43	k__Bacteria;p__Proteobacteria;c__Gammaproteobacteria	1	3	0	10	2	0	0	0	0	0	0	0	0	0	4	0	0	0	0	0	0	128	0	0	k__Bacteria;p__Proteobacteria;c__Gammaproteobacteria
OTU_560	0	0	0	65	0	0	0	0	k__Bacteria;p__Firmicutes;c__Clostridia;o__Oscillospirales;f__Ruminococcaceae;g__Caproiciproducens;s__Clostridium_sp.	0	0	0	0	0	0	0	0	0	193	0	0	0	0	0	0	0	0	0	0	0	0	0	0	k__Bacteria;p__Firmicutes;c__Clostridia;o__Oscillospirales;f__Ruminococcaceae;g__Caproiciproducens;s__Clostridium_sp.
OTU_561	0	0	0	2	1	1	3	59	k__Bacteria	0	0	0	0	0	0	0	0	0	4	0	0	1	0	0	0	0	1	1	4	3	0	130	47	k__Bacteria
OTU_562	0	0	6	0	0	1	110	2	k__Bacteria;p__Verrucomicrobiota;c__Chlamydiae;o__Chlamydiales;f__Parachlamydiaceae;g__Neochlamydia	0	0	0	0	0	0	0	0	17	0	0	0	0	0	0	0	0	1	5	1	323	0	2	3	k__Bacteria;p__Verrucomicrobiota;c__Chlamydiae;o__Chlamydiales;f__Parachlamydiaceae;g__Neochlamydia
OTU_563	2	1	5	7	2	7	0	34	k__Bacteria;p__Firmicutes;c__Clostridia;o__Clostridiales;f__Clostridiaceae;g__Clostridium_sensu_stricto_8;s__	4	0	0	1	0	0	7	4	3	15	1	5	1	3	1	1	8	10	0	0	0	100	1	0	k__Bacteria;p__Firmicutes;c__Clostridia;o__Clostridiales;f__Clostridiaceae;g__Clostridium_sensu_stricto_8;s__
OTU_564	7	2	13	23	4	8	1	17	k__Bacteria;p__Actinobacteriota;c__Actinobacteria;o__Corynebacteriales;f__Corynebacteriaceae;g__Corynebacterium;s__Corynebacterium_tuberculostearicum	15	0	6	1	5	0	29	3	5	26	38	5	7	2	3	9	13	0	2	0	0	41	1	8	k__Bacteria;p__Actinobacteriota;c__Actinobacteria;o__Corynebacteriales;f__Corynebacteriaceae;g__Corynebacterium;s__Corynebacterium_tuberculostearicum
OTU_565	0	1	23	0	0	2	58	5	k__Bacteria;p__Actinobacteriota;c__Thermoleophilia;o__Solirubrobacterales;f__Solirubrobacteraceae;g__Conexibacter;s__	0	0	0	1	0	0	0	68	0	0	0	0	0	0	0	0	0	6	8	148	16	3	3	7	k__Bacteria;p__Actinobacteriota;c__Thermoleophilia;o__Solirubrobacterales;f__Solirubrobacteraceae;g__Conexibacter;s__
OTU_566	75	1	2	2	1	0	0	0	k__Bacteria	29	115	79	0	0	1	0	0	6	0	2	2	2	0	0	0	0	0	0	0	0	0	0	0	k__Bacteria
OTU_567	3	1	8	4	1	4	45	11	k__Bacteria;p__Actinobacteriota;c__Actinobacteria;o__Propionibacteriales;f__Nocardioidaceae;g__Nocardioides	7	2	0	2	1	0	2	1	21	1	10	0	0	0	2	0	0	11	10	10	114	0	10	22	k__Bacteria;p__Actinobacteriota;c__Actinobacteria;o__Propionibacteriales;f__Nocardioidaceae;g__Nocardioides
OTU_568	0	1	14	0	1	3	82	8	k__Bacteria;p__Myxococcota;c__Polyangia;o__Polyangiales;f__Sandaracinaceae;g__	0	0	0	0	0	2	2	38	2	0	0	0	1	0	0	0	0	7	68	160	17	3	9	11	k__Bacteria;p__Myxococcota;c__Polyangia;o__Polyangiales;f__Sandaracinaceae;g__
OTU_569	15	2	5	0	0	1	47	3	k__Bacteria;p__Bacteroidota;c__Bacteroidia;o__Chitinophagales;f__Chitinophagaceae	27	16	2	0	3	1	14	0	0	0	0	0	0	0	0	0	0	2	124	11	4	0	0	7	k__Bacteria;p__Bacteroidota;c__Bacteroidia;o__Chitinophagales;f__Chitinophagaceae
OTU_570	3	1	0	1	0	2	2	39	k__Bacteria;p__Patescibacteria;c__Gracilibacteria;o__Absconditabacteriales_(SR1);f__Absconditabacteriales_(SR1);g__Absconditabacteriales_(SR1);s__	6	0	1	0	0	2	0	0	0	0	2	1	0	0	0	0	0	5	4	0	0	0	15	101	k__Bacteria;p__Patescibacteria;c__Gracilibacteria;o__Absconditabacteriales_(SR1);f__Absconditabacteriales_(SR1);g__Absconditabacteriales_(SR1);s__
OTU_571	5	24	0	6	0	47	0	0	k__Bacteria;p__Firmicutes;c__Limnochordia;o__MBA03;f__MBA03;g__MBA03;s__	2	13	0	0	0	72	0	0	0	0	0	17	0	0	0	0	140	0	0	0	0	0	0	0	k__Bacteria;p__Firmicutes;c__Limnochordia;o__MBA03;f__MBA03;g__MBA03;s__
OTU_572	12	4	19	3	2	6	39	21	k__Bacteria;p__Proteobacteria;c__Alphaproteobacteria;o__Tistrellales;f__Geminicoccaceae;g__Candidatus_Alysiosphaera;s__	16	2	16	3	5	4	0	50	5	4	3	0	4	1	1	7	0	9	16	72	27	9	15	37	k__Bacteria;p__Proteobacteria;c__Alphaproteobacteria;o__Tistrellales;f__Geminicoccaceae;g__Candidatus_Alysiosphaera;s__
OTU_573	11	33	33	40	17	20	34	43	k__Bacteria;p__Proteobacteria;c__Gammaproteobacteria;o__Burkholderiales;f__Comamonadaceae;g__Variovorax;s__Variovorax_sp.	11	9	11	85	11	1	40	38	20	99	13	7	14	9	26	13	7	38	65	7	28	111	3	13	k__Bacteria;p__Proteobacteria;c__Gammaproteobacteria;o__Burkholderiales;f__Comamonadaceae;g__Variovorax;s__Variovorax_sp.
OTU_574	0	0	0	79	0	0	0	0	k__Bacteria;p__Firmicutes;c__Clostridia;o__Oscillospirales;f__Oscillospiraceae;g__Intestinimonas	0	0	0	0	0	0	0	0	0	236	0	0	0	0	0	0	0	0	0	0	0	0	0	0	k__Bacteria;p__Firmicutes;c__Clostridia;o__Oscillospirales;f__Oscillospiraceae;g__Intestinimonas
OTU_575	0	0	0	41	0	0	0	0	k__Bacteria	0	0	0	0	0	0	0	0	0	121	1	0	0	0	0	0	0	0	0	0	0	0	0	0	k__Bacteria
OTU_576	0	0	0	38	0	0	0	0	Unknown	0	0	0	0	0	0	0	0	0	111	0	1	0	0	0	0	0	0	0	0	0	0	0	0	Unknown
OTU_577	0	0	15	0	0	2	87	15	k__Bacteria;p__Proteobacteria;c__Gammaproteobacteria;o__Burkholderiales;f__TRA3-20;g__TRA3-20;s__	0	0	0	0	0	0	19	0	26	0	0	0	0	0	0	0	0	4	57	6	196	30	5	10	k__Bacteria;p__Proteobacteria;c__Gammaproteobacteria;o__Burkholderiales;f__TRA3-20;g__TRA3-20;s__
OTU_578	5	0	16	9	11	8	0	0	k__Bacteria;p__Proteobacteria;c__Gammaproteobacteria;o__Xanthomonadales;f__Xanthomonadaceae;g__Vulcaniibacterium;s__	0	15	0	0	0	0	16	25	6	3	5	17	4	7	20	7	15	0	0	0	0	0	0	0	k__Bacteria;p__Proteobacteria;c__Gammaproteobacteria;o__Xanthomonadales;f__Xanthomonadaceae;g__Vulcaniibacterium;s__
OTU_579	1	2	3	3	0	2	12	35	k__Bacteria;p__Proteobacteria;c__Alphaproteobacteria;o__Caulobacterales;f__Hyphomonadaceae;g__Hirschia;s__	1	2	0	2	3	0	0	0	8	5	3	0	0	0	0	1	0	4	7	6	21	1	87	17	k__Bacteria;p__Proteobacteria;c__Alphaproteobacteria;o__Caulobacterales;f__Hyphomonadaceae;g__Hirschia;s__
OTU_580	29	12	12	6	6	13	2	10	k__Bacteria;p__Firmicutes;c__Bacilli;o__Bacillales;f__Bacillaceae;g__Bacillus;s__Bacillus_aryabhattai	34	48	3	24	5	5	16	14	5	7	5	4	2	9	6	6	14	18	3	0	2	13	6	11	k__Bacteria;p__Firmicutes;c__Bacilli;o__Bacillales;f__Bacillaceae;g__Bacillus;s__Bacillus_aryabhattai
OTU_581	2	1	16	1	0	3	102	12	k__Bacteria;p__Proteobacteria;c__Gammaproteobacteria;o__Burkholderiales;f__Nitrosomonadaceae;g__oc32;s__	5	0	0	0	3	0	14	9	24	1	0	0	0	0	0	0	0	7	54	40	211	0	19	15	k__Bacteria;p__Proteobacteria;c__Gammaproteobacteria;o__Burkholderiales;f__Nitrosomonadaceae;g__oc32;s__
OTU_582	1	0	8	2	1	4	8	2	k__Bacteria;p__Chloroflexi;c__Chloroflexia;o__Thermomicrobiales;f__JG30-KF-CM45;g__JG30-KF-CM45;s__	1	0	0	0	0	0	11	3	8	1	1	3	0	1	0	1	3	6	2	0	22	3	0	2	k__Bacteria;p__Chloroflexi;c__Chloroflexia;o__Thermomicrobiales;f__JG30-KF-CM45;g__JG30-KF-CM45;s__
OTU_583	1	2	0	7	0	2	4	47	k__Bacteria;p__Desulfobacterota;c__Desulfovibrionia;o__Desulfovibrionales;f__Desulfovibrionaceae;g__Desulfovibrio;s__Desulfovibrio_putealis	3	0	0	0	4	1	0	0	0	18	2	0	0	0	0	2	0	3	2	2	6	5	108	28	k__Bacteria;p__Desulfobacterota;c__Desulfovibrionia;o__Desulfovibrionales;f__Desulfovibrionaceae;g__Desulfovibrio;s__Desulfovibrio_putealis
OTU_584	0	0	1	68	0	0	0	0	Unknown	0	0	0	0	0	0	0	3	0	202	0	0	0	0	0	0	0	0	0	0	0	0	0	0	Unknown
OTU_585	0	0	7	0	0	1	67	4	k__Bacteria;p__Planctomycetota;c__Planctomycetes;o__Planctomycetales;f__Schlesneriaceae;g__Schlesneria;s__	0	0	0	0	0	0	7	12	0	0	0	0	0	0	0	0	0	1	93	94	14	2	4	5	k__Bacteria;p__Planctomycetota;c__Planctomycetes;o__Planctomycetales;f__Schlesneriaceae;g__Schlesneria;s__
OTU_586	1	0	0	5	0	2	7	171	k__Bacteria;p__Bacteroidota;c__Bacteroidia;o__Bacteroidales;f__Prolixibacteraceae;g__WCHB1-32;s__	2	0	0	0	0	0	0	0	0	11	2	0	0	0	0	0	0	4	14	4	1	0	410	101	k__Bacteria;p__Bacteroidota;c__Bacteroidia;o__Bacteroidales;f__Prolixibacteraceae;g__WCHB1-32;s__
OTU_587	9	36	3	6	3	5	10	80	k__Bacteria;p__Proteobacteria;c__Gammaproteobacteria;o__Burkholderiales;f__Comamonadaceae;g__Hydrogenophaga	21	2	2	63	27	17	2	2	3	7	8	1	0	0	8	3	1	9	8	7	13	69	87	83	k__Bacteria;p__Proteobacteria;c__Gammaproteobacteria;o__Burkholderiales;f__Comamonadaceae;g__Hydrogenophaga
OTU_588	14	7	3	4	0	1	53	65	k__Bacteria;p__Bacteroidota;c__Bacteroidia;o__Chitinophagales;f__Saprospiraceae;g__Haliscomenobacter;s__	6	4	32	0	13	7	0	0	7	6	4	0	0	0	0	0	0	1	16	3	138	0	106	87	k__Bacteria;p__Bacteroidota;c__Bacteroidia;o__Chitinophagales;f__Saprospiraceae;g__Haliscomenobacter;s__
OTU_589	1	1	9	66	4	5	0	3	k__Bacteria;p__Bacteroidota;c__Bacteroidia;o__Bacteroidales;f__Bacteroidaceae;g__Bacteroides;s__Bacteroides_coprocola	1	0	1	0	0	3	19	4	2	186	9	3	4	2	5	6	8	0	0	0	0	0	6	1	k__Bacteria;p__Bacteroidota;c__Bacteroidia;o__Bacteroidales;f__Bacteroidaceae;g__Bacteroides;s__Bacteroides_coprocola
OTU_590	2	3	3	1	0	1	59	5	k__Bacteria;p__Bacteroidota;c__Bacteroidia;o__Sphingobacteriales;f__env.OPS_17;g__env.OPS_17;s__	2	2	0	1	7	0	0	8	0	2	0	0	0	0	0	0	0	3	51	120	5	0	0	13	k__Bacteria;p__Bacteroidota;c__Bacteroidia;o__Sphingobacteriales;f__env.OPS_17;g__env.OPS_17;s__
OTU_591	6	17	0	3	0	3	5	45	k__Bacteria;p__Actinobacteriota;c__Acidimicrobiia;o__Microtrichales;f__Ilumatobacteraceae;g__Ilumatobacter;s__	4	2	12	1	46	2	0	0	0	5	2	0	0	0	0	7	0	1	2	0	12	7	96	31	k__Bacteria;p__Actinobacteriota;c__Acidimicrobiia;o__Microtrichales;f__Ilumatobacteraceae;g__Ilumatobacter;s__
OTU_592	0	0	0	55	0	0	0	0	Unknown	0	0	0	0	0	0	0	0	0	159	4	0	0	0	0	0	0	0	0	0	0	0	0	0	Unknown
OTU_593	2	1	32	0	1	3	12	0	k__Bacteria;p__Desulfobacterota;c__Syntrophia;o__Syntrophales;f__;g__;s__	4	0	0	0	2	1	96	0	0	0	0	0	0	1	0	0	9	0	36	0	0	0	0	0	k__Bacteria;p__Desulfobacterota;c__Syntrophia;o__Syntrophales;f__;g__;s__
OTU_594	0	1	2	0	0	0	55	3	k__Bacteria;p__Planctomycetota;c__Planctomycetes;o__Pirellulales;f__Pirellulaceae;g__;s__	0	0	0	0	2	0	1	0	4	0	0	0	0	0	0	0	0	0	59	6	100	1	5	2	k__Bacteria;p__Planctomycetota;c__Planctomycetes;o__Pirellulales;f__Pirellulaceae;g__;s__
OTU_595	0	0	1	0	0	0	48	0	k__Bacteria;p__Patescibacteria;c__Gracilibacteria;o__Absconditabacteriales_(SR1);f__Absconditabacteriales_(SR1);g__Absconditabacteriales_(SR1);s__	0	0	0	0	0	0	0	0	1	0	0	0	0	0	0	0	0	0	2	1	141	0	0	0	k__Bacteria;p__Patescibacteria;c__Gracilibacteria;o__Absconditabacteriales_(SR1);f__Absconditabacteriales_(SR1);g__Absconditabacteriales_(SR1);s__
OTU_596	1	1	6	0	0	1	52	15	k__Bacteria;p__Patescibacteria;c__Saccharimonadia;o__Saccharimonadales;f__Saccharimonadales;g__Saccharimonadales;s__	1	1	0	0	0	2	1	9	8	0	0	0	0	0	0	0	0	1	10	24	122	16	4	25	k__Bacteria;p__Patescibacteria;c__Saccharimonadia;o__Saccharimonadales;f__Saccharimonadales;g__Saccharimonadales;s__
OTU_597	43	0	0	0	1	0	0	0	Unknown	3	15	109	0	0	0	0	0	0	0	0	0	1	0	0	0	0	0	0	0	0	0	0	0	Unknown
OTU_598	22	15	1	6	0	9	0	0	k__Bacteria;p__Bacteroidota;c__Bacteroidia;o__Bacteroidales;f__Marinilabiliaceae;g__Marinilabiliaceae;s__	0	65	0	0	0	43	0	1	0	0	0	18	0	0	0	0	26	0	0	0	0	0	0	0	k__Bacteria;p__Bacteroidota;c__Bacteroidia;o__Bacteroidales;f__Marinilabiliaceae;g__Marinilabiliaceae;s__
OTU_599	6	18	0	1	3	1	2	18	k__Bacteria;p__Bacteroidota;c__Bacteroidia;o__Cytophagales;f__Spirosomaceae;g__Emticicia;s__Emticicia_sp.	4	9	4	0	48	6	0	0	0	1	0	0	0	7	0	1	0	0	1	4	1	0	38	16	k__Bacteria;p__Bacteroidota;c__Bacteroidia;o__Cytophagales;f__Spirosomaceae;g__Emticicia;s__Emticicia_sp.
OTU_600	3	5	20	4	0	3	46	36	k__Bacteria;p__WPS-2;c__WPS-2;o__WPS-2;f__WPS-2;g__WPS-2;s__	6	1	0	0	11	2	29	28	2	9	2	0	0	0	0	1	0	8	83	41	12	41	34	32	k__Bacteria;p__WPS-2;c__WPS-2;o__WPS-2;f__WPS-2;g__WPS-2;s__
OTU_601	1	2	7	1	3	7	1	1	k__Bacteria;p__Proteobacteria;c__Alphaproteobacteria;o__Rhizobiales;f__Rhizobiaceae;g__Aureimonas;s__Aureimonas_sp.	1	1	0	2	2	1	7	5	8	1	2	0	1	2	5	3	4	12	0	1	0	2	0	0	k__Bacteria;p__Proteobacteria;c__Alphaproteobacteria;o__Rhizobiales;f__Rhizobiaceae;g__Aureimonas;s__Aureimonas_sp.
OTU_602	35	5	0	2	0	0	0	0	k__Bacteria;p__Proteobacteria;c__Gammaproteobacteria;o__Burkholderiales;f__Chromobacteriaceae;g__Aquitalea;s__Aquitalea_sp.	64	37	2	6	3	5	0	0	0	0	2	3	0	0	0	0	0	0	0	0	0	0	0	0	k__Bacteria;p__Proteobacteria;c__Gammaproteobacteria;o__Burkholderiales;f__Chromobacteriaceae;g__Aquitalea;s__Aquitalea_sp.
OTU_603	1	0	0	45	0	0	0	0	k__Bacteria;p__Firmicutes;c__Clostridia;o__Peptostreptococcales-Tissierellales;f__Peptostreptococcales-Tissierellales;g__Sporanaerobacter	1	2	0	0	0	0	0	0	0	133	0	0	0	0	0	0	0	0	0	0	0	0	0	0	k__Bacteria;p__Firmicutes;c__Clostridia;o__Peptostreptococcales-Tissierellales;f__Peptostreptococcales-Tissierellales;g__Sporanaerobacter
OTU_604	10	15	9	9	2	14	16	44	k__Bacteria;p__Proteobacteria;c__Alphaproteobacteria;o__Rhizobiales;f__Devosiaceae	22	2	4	1	42	2	16	2	7	18	3	4	1	0	3	29	1	10	21	2	24	16	92	24	k__Bacteria;p__Proteobacteria;c__Alphaproteobacteria;o__Rhizobiales;f__Devosiaceae
OTU_605	53	0	0	0	2	0	1	0	k__Bacteria;p__Chloroflexi;c__Chloroflexia;o__Chloroflexales;f__Chloroflexaceae;g__Chloronema;s__	5	3	150	0	0	0	0	0	0	0	0	0	4	0	0	0	0	0	0	0	1	0	0	0	k__Bacteria;p__Chloroflexi;c__Chloroflexia;o__Chloroflexales;f__Chloroflexaceae;g__Chloronema;s__
OTU_606	1	0	4	1	0	1	31	14	k__Bacteria;p__Proteobacteria;c__Alphaproteobacteria;o__Acetobacterales;f__Acetobacteraceae;g__Craurococcus-Caldovatus;s__	0	0	1	0	0	0	0	8	4	0	2	0	0	0	0	0	0	2	3	78	10	31	4	6	k__Bacteria;p__Proteobacteria;c__Alphaproteobacteria;o__Acetobacterales;f__Acetobacteraceae;g__Craurococcus-Caldovatus;s__
OTU_607	1	3	1	1	0	1	1	142	k__Bacteria;p__Bacteroidota;c__Bacteroidia;o__Cytophagales;f__Microscillaceae;g__Chryseolinea;s__	2	0	0	7	0	0	0	1	0	1	0	0	0	0	0	0	0	2	1	0	0	414	0	12	k__Bacteria;p__Bacteroidota;c__Bacteroidia;o__Cytophagales;f__Microscillaceae;g__Chryseolinea;s__
OTU_608	9	0	21	34	5	15	1	5	k__Bacteria;p__Firmicutes;c__Clostridia;o__Lachnospirales;f__Lachnospiraceae;g__Anaerostipes;s__Anaerostipes_caccae	12	15	0	0	0	0	24	33	4	20	37	44	4	5	6	10	34	0	0	1	0	0	2	12	k__Bacteria;p__Firmicutes;c__Clostridia;o__Lachnospirales;f__Lachnospiraceae;g__Anaerostipes;s__Anaerostipes_caccae
OTU_609	6	0	0	6	1	1	6	36	k__Bacteria;p__Bdellovibrionota;c__Oligoflexia;o__Oligoflexales;f__;g__;s__	15	1	0	0	0	0	0	0	0	3	14	0	0	1	0	0	0	3	9	6	3	0	8	99	k__Bacteria;p__Bdellovibrionota;c__Oligoflexia;o__Oligoflexales;f__;g__;s__
OTU_610	0	2	10	0	0	1	26	4	k__Bacteria;p__Bdellovibrionota;c__Bdellovibrionia;o__Bdellovibrionales;f__Bdellovibrionaceae;g__Bdellovibrio;s__	0	0	0	2	2	0	29	0	0	0	0	0	0	0	0	0	0	1	73	2	2	1	2	8	k__Bacteria;p__Bdellovibrionota;c__Bdellovibrionia;o__Bdellovibrionales;f__Bdellovibrionaceae;g__Bdellovibrio;s__
OTU_611	0	1	56	0	0	0	28	0	k__Bacteria;p__Bacteroidota;c__Bacteroidia;o__Bacteroidales;f__Rikenellaceae;g__Rikenellaceae_RC9_gut_group;s__	0	0	0	0	0	2	166	0	0	0	0	0	0	0	0	0	0	0	84	0	0	0	0	0	k__Bacteria;p__Bacteroidota;c__Bacteroidia;o__Bacteroidales;f__Rikenellaceae;g__Rikenellaceae_RC9_gut_group;s__
OTU_612	0	0	15	0	0	0	35	4	k__Bacteria	0	0	0	0	0	0	0	41	4	0	0	0	0	0	0	0	0	0	11	84	10	0	4	7	k__Bacteria
OTU_613	2	2	8	0	0	3	49	8	k__Bacteria;p__Bacteroidota;c__Bacteroidia;o__Cytophagales;f__Microscillaceae;g__;s__	4	0	0	2	4	0	22	0	0	0	0	0	0	0	0	2	0	6	131	6	8	0	9	15	k__Bacteria;p__Bacteroidota;c__Bacteroidia;o__Cytophagales;f__Microscillaceae;g__;s__
OTU_614	25	0	5	5	0	0	0	0	k__Bacteria	20	24	31	0	0	0	0	10	4	5	6	3	0	0	0	0	0	0	0	0	0	0	0	0	k__Bacteria
OTU_615	0	0	3	0	0	1	45	3	k__Bacteria;p__Verrucomicrobiota;c__Verrucomicrobiae;o__Opitutales;f__Opitutaceae	0	0	0	0	0	0	7	0	0	0	0	0	0	0	0	0	0	2	102	3	30	0	4	5	k__Bacteria;p__Verrucomicrobiota;c__Verrucomicrobiae;o__Opitutales;f__Opitutaceae
OTU_616	12	36	0	0	1	5	1	2	k__Bacteria;p__Proteobacteria;c__Gammaproteobacteria;o__Burkholderiales;f__Chitinimonadaceae;g__Chitinimonas	11	18	5	4	98	4	0	0	0	0	0	0	1	0	1	12	0	1	0	0	3	0	2	2	k__Bacteria;p__Proteobacteria;c__Gammaproteobacteria;o__Burkholderiales;f__Chitinimonadaceae;g__Chitinimonas
OTU_617	56	2	0	0	4	0	0	0	k__Bacteria;p__Bdellovibrionota;c__Bdellovibrionia;o__Bacteriovoracales;f__Bacteriovoracaceae;g__Peredibacter	10	9	148	1	2	1	0	0	0	0	0	0	11	0	0	0	0	0	0	0	0	0	0	0	k__Bacteria;p__Bdellovibrionota;c__Bdellovibrionia;o__Bacteriovoracales;f__Bacteriovoracaceae;g__Peredibacter
OTU_618	3	3	0	0	3	0	1	5	k__Bacteria;p__Proteobacteria;c__Gammaproteobacteria	6	2	1	4	2	3	0	0	0	0	0	0	0	9	0	0	0	0	3	0	0	14	0	0	k__Bacteria;p__Proteobacteria;c__Gammaproteobacteria
OTU_619	10	19	0	5	0	41	0	0	k__Bacteria;p__Firmicutes;c__Bacilli;o__Bacillales;f__Bacillaceae;g__Amphibacillus;s__Amphibacillus_xylanus	0	28	0	0	0	57	0	0	0	0	0	15	0	0	0	0	122	1	0	0	0	0	0	0	k__Bacteria;p__Firmicutes;c__Bacilli;o__Bacillales;f__Bacillaceae;g__Amphibacillus;s__Amphibacillus_xylanus
OTU_620	3	6	0	0	1	0	0	2	k__Bacteria;p__Bacteroidota;c__Bacteroidia;o__Cytophagales;f__Spirosomaceae;g__Lacihabitans;s__	1	5	2	9	4	3	0	0	0	0	0	0	0	1	0	0	0	0	0	0	0	0	2	2	k__Bacteria;p__Bacteroidota;c__Bacteroidia;o__Cytophagales;f__Spirosomaceae;g__Lacihabitans;s__
OTU_621	1	0	0	1	0	0	3	44	k__Bacteria;p__Patescibacteria;c__Saccharimonadia;o__Saccharimonadales;f__Saccharimonadales;g__Saccharimonadales;s__	2	0	0	0	0	0	0	0	0	1	1	0	0	0	0	0	0	0	2	4	3	0	24	106	k__Bacteria;p__Patescibacteria;c__Saccharimonadia;o__Saccharimonadales;f__Saccharimonadales;g__Saccharimonadales;s__
OTU_622	1	0	10	0	0	3	45	4	k__Bacteria;p__NB1-j;c__NB1-j;o__NB1-j;f__NB1-j;g__NB1-j;s__	0	0	1	0	0	0	0	1	29	0	0	0	0	0	0	0	0	8	12	4	117	1	5	6	k__Bacteria;p__NB1-j;c__NB1-j;o__NB1-j;f__NB1-j;g__NB1-j;s__
OTU_623	1	0	8	0	0	2	34	7	k__Bacteria;p__Proteobacteria;c__Gammaproteobacteria;o__Steroidobacterales;f__Steroidobacteraceae;g__;s__	1	0	0	0	0	0	0	0	24	0	0	0	0	0	0	0	0	6	3	9	88	5	1	13	k__Bacteria;p__Proteobacteria;c__Gammaproteobacteria;o__Steroidobacterales;f__Steroidobacteraceae;g__;s__
OTU_624	1	30	4	0	0	2	44	10	k__Bacteria;p__Verrucomicrobiota;c__Verrucomicrobiae;o__Opitutales;f__Opitutaceae;g__Opitutus;s__	2	1	0	0	90	0	2	4	6	0	0	0	0	0	0	3	0	1	28	70	33	1	20	8	k__Bacteria;p__Verrucomicrobiota;c__Verrucomicrobiae;o__Opitutales;f__Opitutaceae;g__Opitutus;s__
OTU_625	1	13	0	1	0	29	0	0	k__Bacteria;p__Firmicutes;c__Clostridia;o__Lachnospirales;f__Lachnospiraceae	0	3	0	0	0	39	0	0	0	0	0	2	0	0	0	0	86	0	0	0	0	0	0	0	k__Bacteria;p__Firmicutes;c__Clostridia;o__Lachnospirales;f__Lachnospiraceae
OTU_626	53	5	2	3	0	0	2	1	k__Bacteria;p__Proteobacteria;c__Gammaproteobacteria;o__Burkholderiales;f__Rhodocyclaceae;g__Zoogloea;s__	92	56	11	4	6	4	0	4	1	0	4	3	0	0	0	0	0	0	0	1	3	0	0	1	k__Bacteria;p__Proteobacteria;c__Gammaproteobacteria;o__Burkholderiales;f__Rhodocyclaceae;g__Zoogloea;s__
OTU_627	0	26	0	0	3	22	0	0	k__Bacteria	0	0	0	0	78	0	0	0	0	0	0	0	0	8	1	8	57	0	0	0	0	0	0	0	k__Bacteria
OTU_628	0	0	17	0	0	2	44	5	k__Bacteria;p__Myxococcota;c__Myxococcia;o__Myxococcales;f__Myxococcaceae;g__P3OB-42;s__	0	0	0	0	0	0	44	2	3	0	0	0	0	0	0	0	0	5	106	10	16	6	4	5	k__Bacteria;p__Myxococcota;c__Myxococcia;o__Myxococcales;f__Myxococcaceae;g__P3OB-42;s__
OTU_629	0	0	0	33	0	0	0	0	k__Bacteria;p__Firmicutes;c__Clostridia;o__Oscillospirales;f__Ruminococcaceae;g__Negativibacillus;s__	0	0	0	0	0	0	0	0	0	99	0	0	0	0	0	0	0	0	0	0	0	0	0	0	k__Bacteria;p__Firmicutes;c__Clostridia;o__Oscillospirales;f__Ruminococcaceae;g__Negativibacillus;s__
OTU_630	3	0	8	122	2	1	0	1	k__Bacteria;p__Bacteroidota;c__Bacteroidia;o__Bacteroidales;f__Bacteroidaceae;g__Bacteroides;s__Bacteroides_uniformis	4	2	3	0	0	0	21	2	1	357	5	2	3	0	3	0	3	0	0	0	0	0	2	0	k__Bacteria;p__Bacteroidota;c__Bacteroidia;o__Bacteroidales;f__Bacteroidaceae;g__Bacteroides;s__Bacteroides_uniformis
OTU_631	0	0	5	2	3	6	0	0	k__Bacteria;p__Bacteroidota;c__Bacteroidia;o__Chitinophagales;f__Chitinophagaceae;g__Terrimonas	0	0	0	0	0	0	12	3	0	2	3	0	0	2	5	1	1	15	0	0	0	0	0	0	k__Bacteria;p__Bacteroidota;c__Bacteroidia;o__Chitinophagales;f__Chitinophagaceae;g__Terrimonas
OTU_632	0	0	6	2	5	6	0	0	k__Bacteria;p__Bacteroidota;c__Bacteroidia;o__Chitinophagales;f__Chitinophagaceae;g__Parasegetibacter;s__	0	0	0	0	0	0	14	2	1	3	1	1	2	1	10	4	7	5	0	0	0	0	0	0	k__Bacteria;p__Bacteroidota;c__Bacteroidia;o__Chitinophagales;f__Chitinophagaceae;g__Parasegetibacter;s__
OTU_633	17	4	48	18	19	38	66	36	k__Bacteria;p__Proteobacteria;c__Alphaproteobacteria;o__Sphingomonadales;f__Sphingomonadaceae;g__Sphingopyxis	13	6	31	4	1	5	81	27	36	14	26	12	29	6	21	14	17	83	117	13	68	32	24	52	k__Bacteria;p__Proteobacteria;c__Alphaproteobacteria;o__Sphingomonadales;f__Sphingomonadaceae;g__Sphingopyxis
OTU_634	0	0	6	2	2	9	0	1	k__Bacteria;p__Proteobacteria;c__Alphaproteobacteria;o__Sphingomonadales;f__Sphingomonadaceae;g__Sphingobium	0	0	0	0	0	0	4	10	2	3	0	3	2	1	3	3	4	19	0	0	0	0	0	3	k__Bacteria;p__Proteobacteria;c__Alphaproteobacteria;o__Sphingomonadales;f__Sphingomonadaceae;g__Sphingobium
OTU_635	0	0	7	0	0	2	40	3	k__Bacteria;p__Verrucomicrobiota;c__Verrucomicrobiae;o__Opitutales;f__Opitutaceae;g__Lacunisphaera;s__	0	0	0	0	0	0	0	21	0	0	0	0	0	0	0	0	0	4	8	105	7	0	4	5	k__Bacteria;p__Verrucomicrobiota;c__Verrucomicrobiae;o__Opitutales;f__Opitutaceae;g__Lacunisphaera;s__
OTU_636	2	3	20	0	3	5	10	0	k__Bacteria;p__Synergistota;c__Synergistia;o__Synergistales;f__Synergistaceae;g__Aminobacterium;s__	1	3	2	0	1	6	58	0	0	0	0	0	0	6	1	0	15	0	29	0	0	0	0	0	k__Bacteria;p__Synergistota;c__Synergistia;o__Synergistales;f__Synergistaceae;g__Aminobacterium;s__
OTU_637	6	7	0	59	0	14	0	0	k__Bacteria;p__Firmicutes;c__Clostridia;o__Oscillospirales;f__Oscillospiraceae;g__;s__Pseudoflavonifractor_sp.	0	16	0	0	0	20	0	0	0	163	0	13	0	0	0	0	40	0	0	0	0	0	0	0	k__Bacteria;p__Firmicutes;c__Clostridia;o__Oscillospirales;f__Oscillospiraceae;g__;s__Pseudoflavonifractor_sp.
OTU_638	1	1	8	0	0	1	73	19	k__Bacteria;p__Proteobacteria;c__Gammaproteobacteria;o__Gammaproteobacteria_Incertae_Sedis;f__Unknown_Family;g__Acidibacter;s__	1	0	0	2	0	1	1	0	23	0	0	0	0	0	0	0	0	3	18	6	193	47	2	8	k__Bacteria;p__Proteobacteria;c__Gammaproteobacteria;o__Gammaproteobacteria_Incertae_Sedis;f__Unknown_Family;g__Acidibacter;s__
OTU_639	2	3	1	2	0	1	7	36	k__Bacteria;p__Actinobacteriota;c__Acidimicrobiia;o__Microtrichales;f__Ilumatobacteraceae;g__;s__	6	0	0	0	4	4	1	0	1	6	0	0	0	0	0	1	0	0	11	5	4	26	53	29	k__Bacteria;p__Actinobacteriota;c__Acidimicrobiia;o__Microtrichales;f__Ilumatobacteraceae;g__;s__
OTU_640	0	35	0	0	0	7	0	0	k__Bacteria	0	0	0	0	103	0	0	0	0	0	0	0	0	0	0	9	11	0	0	0	0	0	0	0	k__Bacteria
OTU_641	2	0	19	3	2	4	35	7	k__Bacteria;p__Actinobacteriota;c__Actinobacteria;o__Streptomycetales;f__Streptomycetaceae;g__Streptomyces;s__Streptomyces_albidoflavus	1	2	1	0	0	0	55	1	1	0	3	5	3	0	2	1	2	9	95	2	6	0	9	12	k__Bacteria;p__Actinobacteriota;c__Actinobacteria;o__Streptomycetales;f__Streptomycetaceae;g__Streptomyces;s__Streptomyces_albidoflavus
OTU_642	2	2	9	2	1	1	32	8	k__Bacteria;p__Bdellovibrionota;c__Bdellovibrionia;o__Bdellovibrionales;f__Bdellovibrionaceae;g__Bdellovibrio;s__	4	0	0	5	0	0	0	26	0	0	4	0	1	0	0	0	0	2	5	77	13	1	3	18	k__Bacteria;p__Bdellovibrionota;c__Bdellovibrionia;o__Bdellovibrionales;f__Bdellovibrionaceae;g__Bdellovibrio;s__
OTU_643	0	1	11	2	5	7	0	1	k__Bacteria;p__Bacteroidota;c__Bacteroidia;o__Flavobacteriales;f__Flavobacteriaceae;g__Flavobacterium;s__Flavobacterium_sp.	0	0	0	0	1	0	23	5	4	2	2	1	2	0	13	2	6	11	0	0	0	0	2	0	k__Bacteria;p__Bacteroidota;c__Bacteroidia;o__Flavobacteriales;f__Flavobacteriaceae;g__Flavobacterium;s__Flavobacterium_sp.
OTU_644	0	0	5	2	2	6	0	0	k__Bacteria;p__Bacteroidota;c__Bacteroidia;o__Cytophagales;f__Spirosomaceae	0	0	0	0	0	0	8	5	0	2	1	3	0	0	5	0	10	8	0	0	0	0	0	0	k__Bacteria;p__Bacteroidota;c__Bacteroidia;o__Cytophagales;f__Spirosomaceae
OTU_645	0	0	0	1	25	89	0	0	k__Bacteria	0	0	0	0	0	0	0	0	0	0	1	0	70	0	4	64	156	47	0	0	0	0	0	0	k__Bacteria
OTU_646	0	0	2	0	0	1	36	1	k__Bacteria;p__Planctomycetota;c__Phycisphaerae;o__Phycisphaerales;f__Phycisphaeraceae;g__SM1A02;s__	0	0	0	0	0	0	0	0	5	0	0	0	0	0	0	0	0	3	0	0	108	0	0	2	k__Bacteria;p__Planctomycetota;c__Phycisphaerae;o__Phycisphaerales;f__Phycisphaeraceae;g__SM1A02;s__
OTU_647	2	2	11	1	1	5	63	40	k__Bacteria;p__Proteobacteria;c__Alphaproteobacteria;o__Rhizobiales;f__Hyphomicrobiaceae;g__Pedomicrobium;s__	5	1	0	0	4	1	14	5	13	3	0	0	0	1	0	0	3	11	26	11	150	49	42	29	k__Bacteria;p__Proteobacteria;c__Alphaproteobacteria;o__Rhizobiales;f__Hyphomicrobiaceae;g__Pedomicrobium;s__
OTU_648	1	5	0	4	0	2	5	29	k__Bacteria;p__Proteobacteria;c__Alphaproteobacteria;o__Micavibrionales;f__;g__;s__	1	2	0	0	13	0	0	0	0	9	2	0	0	0	0	5	0	1	3	2	8	0	64	23	k__Bacteria;p__Proteobacteria;c__Alphaproteobacteria;o__Micavibrionales;f__;g__;s__
OTU_649	0	2	6	1	3	4	0	0	k__Bacteria;p__Bacteroidota;c__Bacteroidia;o__Flavobacteriales;f__Weeksellaceae;g__Chryseobacterium;s__	0	0	0	4	0	0	8	6	4	3	0	0	7	0	0	1	4	5	0	0	0	0	0	0	k__Bacteria;p__Bacteroidota;c__Bacteroidia;o__Flavobacteriales;f__Weeksellaceae;g__Chryseobacterium;s__
OTU_650	1	1	20	5	2	6	8	18	k__Bacteria;p__Proteobacteria;c__Alphaproteobacteria;o__Rhodobacterales;f__Rhodobacteraceae;g__Paracoccus	2	0	1	1	0	0	48	6	6	2	9	2	1	2	1	1	8	9	18	2	2	22	8	22	k__Bacteria;p__Proteobacteria;c__Alphaproteobacteria;o__Rhodobacterales;f__Rhodobacteraceae;g__Paracoccus
OTU_651	0	0	3	0	0	0	33	1	k__Bacteria;p__Acidobacteriota;c__Blastocatellia;o__Blastocatellales;f__Blastocatellaceae;g__JGI_0001001-H03;s__	0	0	0	0	0	0	8	0	0	0	0	0	0	0	0	0	0	0	96	0	1	0	0	1	k__Bacteria;p__Acidobacteriota;c__Blastocatellia;o__Blastocatellales;f__Blastocatellaceae;g__JGI_0001001-H03;s__
OTU_652	0	0	0	0	0	0	0	48	k__Bacteria;p__Bdellovibrionota;c__Bdellovibrionia;o__Bdellovibrionales;f__Bdellovibrionaceae;g__Bdellovibrio;s__	0	0	0	0	0	0	0	0	0	0	0	0	0	0	0	0	0	0	0	0	0	144	0	0	k__Bacteria;p__Bdellovibrionota;c__Bdellovibrionia;o__Bdellovibrionales;f__Bdellovibrionaceae;g__Bdellovibrio;s__
OTU_653	0	0	0	0	11	16	0	0	k__Bacteria	0	0	0	0	0	0	0	0	0	0	0	0	0	0	31	0	0	46	0	0	0	0	0	0	k__Bacteria
OTU_654	3	16	0	3	0	31	0	0	k__Bacteria;p__Firmicutes;c__Limnochordia;o__MBA03;f__MBA03;g__MBA03;s__	0	9	0	0	0	46	0	0	0	0	0	8	0	0	0	0	93	0	0	0	0	0	0	0	k__Bacteria;p__Firmicutes;c__Limnochordia;o__MBA03;f__MBA03;g__MBA03;s__
OTU_655	1	0	12	1	1	2	25	6	k__Bacteria;p__Proteobacteria;c__Alphaproteobacteria;o__Rhizobiales;f__Beijerinckiaceae;g__	1	0	0	0	0	0	25	10	0	0	1	0	0	3	0	0	0	5	36	32	5	5	1	11	k__Bacteria;p__Proteobacteria;c__Alphaproteobacteria;o__Rhizobiales;f__Beijerinckiaceae;g__
OTU_656	0	0	5	0	0	1	31	5	k__Bacteria;p__Bacteroidota;c__Bacteroidia;o__Chitinophagales;f__Chitinophagaceae;g__Edaphobaculum;s__	0	0	0	0	0	0	14	0	1	0	0	0	0	0	0	0	0	1	83	0	8	0	3	11	k__Bacteria;p__Bacteroidota;c__Bacteroidia;o__Chitinophagales;f__Chitinophagaceae;g__Edaphobaculum;s__
OTU_657	1	1	4	5	2	1	1	1	k__Bacteria;p__Firmicutes;c__Bacilli;o__Erysipelotrichales;f__Erysipelotrichaceae;g__Faecalibaculum	1	0	0	0	0	1	3	6	1	9	3	2	2	3	0	0	1	1	1	0	0	2	0	0	k__Bacteria;p__Firmicutes;c__Bacilli;o__Erysipelotrichales;f__Erysipelotrichaceae;g__Faecalibaculum
OTU_658	1	1	17	0	0	3	16	1	k__Bacteria;p__Actinobacteriota;c__Coriobacteriia;o__Coriobacteriales;f__Atopobiaceae;g__Atopobium;s__bacterium	2	0	0	0	0	3	51	0	0	0	0	0	0	0	0	0	7	0	46	0	0	0	0	1	k__Bacteria;p__Actinobacteriota;c__Coriobacteriia;o__Coriobacteriales;f__Atopobiaceae;g__Atopobium;s__bacterium
OTU_659	2	2	2	5	0	4	11	49	k__Bacteria;p__Actinobacteriota;c__Acidimicrobiia;o__Microtrichales;f__Ilumatobacteraceae	1	0	3	0	4	0	0	0	5	11	4	0	0	0	0	0	0	11	16	4	12	3	101	43	k__Bacteria;p__Actinobacteriota;c__Acidimicrobiia;o__Microtrichales;f__Ilumatobacteraceae
OTU_660	1	3	7	1	1	3	51	3	k__Bacteria;p__Planctomycetota;c__Planctomycetes;o__Isosphaerales;f__Isosphaeraceae;g__Paludisphaera;s__	1	1	0	7	0	0	5	14	1	0	0	1	0	2	0	3	0	4	19	124	10	4	2	2	k__Bacteria;p__Planctomycetota;c__Planctomycetes;o__Isosphaerales;f__Isosphaeraceae;g__Paludisphaera;s__
OTU_661	0	0	0	1	1	100	2	3	k__Bacteria	0	0	0	0	0	0	0	0	0	0	1	0	0	0	2	4	0	296	1	2	2	0	0	8	k__Bacteria
OTU_662	8	29	0	3	1	6	1	23	k__Bacteria;p__Cyanobacteria;c__Cyanobacteriia;o__Phormidesmiales;f__Nodosilineaceae;g__Nodosilinea_PCC-7104	12	6	4	4	71	11	0	0	0	6	1	0	0	2	0	18	0	0	0	0	1	0	45	22	k__Bacteria;p__Cyanobacteria;c__Cyanobacteriia;o__Phormidesmiales;f__Nodosilineaceae;g__Nodosilinea_PCC-7104
OTU_663	5	8	13	7	6	10	18	41	k__Bacteria;p__Actinobacteriota;c__Actinobacteria;o__Micrococcales;f__Cellulomonadaceae;g__Cellulomonas	11	0	3	15	1	8	15	8	15	8	11	0	6	1	10	0	7	22	33	6	15	44	17	60	k__Bacteria;p__Actinobacteriota;c__Actinobacteria;o__Micrococcales;f__Cellulomonadaceae;g__Cellulomonas
OTU_664	5	10	6	2	4	4	21	41	k__Bacteria;p__Proteobacteria;c__Alphaproteobacteria;o__Rhizobiales;f__Xanthobacteraceae;g__Xanthobacter;s__	9	3	1	23	0	5	10	6	1	2	2	0	1	2	8	2	5	4	20	19	23	90	8	24	k__Bacteria;p__Proteobacteria;c__Alphaproteobacteria;o__Rhizobiales;f__Xanthobacteraceae;g__Xanthobacter;s__
OTU_665	3	14	1	0	0	5	2	6	k__Bacteria;p__Proteobacteria;c__Alphaproteobacteria;o__Acetobacterales;f__Acetobacteraceae;g__Rubritepida;s__	6	1	0	3	38	0	0	1	0	0	0	0	0	0	0	13	0	1	3	2	1	0	12	6	k__Bacteria;p__Proteobacteria;c__Alphaproteobacteria;o__Acetobacterales;f__Acetobacteraceae;g__Rubritepida;s__
OTU_666	44	1	1	0	3	0	3	1	k__Bacteria;p__Chloroflexi;c__Chloroflexia;o__Chloroflexales;f__Chloroflexaceae;g__Candidatus_Chloroploca	3	2	125	0	0	1	1	0	0	0	0	0	9	0	0	0	0	0	0	2	6	0	1	0	k__Bacteria;p__Chloroflexi;c__Chloroflexia;o__Chloroflexales;f__Chloroflexaceae;g__Candidatus_Chloroploca
OTU_667	0	0	7	0	0	0	53	2	k__Bacteria;p__Proteobacteria;c__Gammaproteobacteria;o__Burkholderiales;f__Nitrosomonadaceae;g__DSSD61;s__	0	0	0	0	0	0	0	0	21	0	0	0	0	0	0	0	0	0	7	8	144	0	2	2	k__Bacteria;p__Proteobacteria;c__Gammaproteobacteria;o__Burkholderiales;f__Nitrosomonadaceae;g__DSSD61;s__
OTU_668	0	1	4	0	0	1	38	3	k__Bacteria;p__Proteobacteria;c__Alphaproteobacteria;o__Acetobacterales;f__Acetobacteraceae	0	0	0	2	0	0	1	10	0	0	0	0	0	0	0	0	0	2	0	94	18	1	3	4	k__Bacteria;p__Proteobacteria;c__Alphaproteobacteria;o__Acetobacterales;f__Acetobacteraceae
OTU_669	0	0	1	0	0	0	38	1	k__Bacteria;p__Patescibacteria;c__Saccharimonadia;o__Saccharimonadales;f__Saccharimonadales;g__Saccharimonadales;s__	0	0	0	0	0	0	0	0	3	0	0	0	0	0	0	0	0	0	0	26	86	1	1	0	k__Bacteria;p__Patescibacteria;c__Saccharimonadia;o__Saccharimonadales;f__Saccharimonadales;g__Saccharimonadales;s__
OTU_670	1	0	2	0	1	2	33	2	k__Bacteria;p__Patescibacteria;c__Saccharimonadia;o__Saccharimonadales	0	1	0	0	0	0	0	0	4	0	0	0	0	0	2	0	0	5	4	1	94	0	1	3	k__Bacteria;p__Patescibacteria;c__Saccharimonadia;o__Saccharimonadales
OTU_671	0	0	17	0	1	2	42	7	k__Bacteria;p__Myxococcota;c__Polyangia;o__mle1-27;f__mle1-27;g__mle1-27;s__	0	0	0	0	0	0	48	1	0	0	0	0	1	0	0	0	0	5	106	14	6	2	9	8	k__Bacteria;p__Myxococcota;c__Polyangia;o__mle1-27;f__mle1-27;g__mle1-27;s__
OTU_672	5	6	4	0	5	3	28	11	k__Bacteria;p__Proteobacteria;c__Alphaproteobacteria;o__Caulobacterales;f__Hyphomonadaceae;g__SWB02;s__	4	1	8	16	0	2	3	0	9	0	0	0	0	0	14	0	0	9	3	8	72	21	5	5	k__Bacteria;p__Proteobacteria;c__Alphaproteobacteria;o__Caulobacterales;f__Hyphomonadaceae;g__SWB02;s__
OTU_673	10	15	15	9	7	13	16	39	k__Bacteria;p__Proteobacteria;c__Gammaproteobacteria;o__Cellvibrionales;f__Cellvibrionaceae;g__Cellvibrio	22	1	6	1	36	6	12	28	4	16	11	0	5	6	9	17	2	20	12	26	9	20	44	51	k__Bacteria;p__Proteobacteria;c__Gammaproteobacteria;o__Cellvibrionales;f__Cellvibrionaceae;g__Cellvibrio
OTU_674	2	0	3	2	1	3	0	0	k__Bacteria;p__Chloroflexi;c__Chloroflexia;o__Chloroflexales;f__Chloroflexaceae;g__Chloronema;s__	0	0	4	0	0	0	3	4	0	2	4	0	2	0	1	2	0	6	0	0	0	0	0	0	k__Bacteria;p__Chloroflexi;c__Chloroflexia;o__Chloroflexales;f__Chloroflexaceae;g__Chloronema;s__
OTU_675	0	0	0	43	0	0	0	0	k__Bacteria;p__Proteobacteria;c__Gammaproteobacteria;o__Burkholderiales;f__Methylophilaceae;g__OM43_clade;s__	0	0	0	0	0	0	0	0	0	127	0	0	0	0	0	0	0	0	0	0	0	0	0	0	k__Bacteria;p__Proteobacteria;c__Gammaproteobacteria;o__Burkholderiales;f__Methylophilaceae;g__OM43_clade;s__
OTU_676	1	1	0	1	0	2	1	37	k__Bacteria;p__Proteobacteria;c__Alphaproteobacteria;o__Sphingomonadales;f__Sphingomonadaceae;g__Sphingomonas;s__	1	0	0	0	0	1	0	0	0	0	1	2	0	0	0	3	2	1	0	2	0	92	6	12	k__Bacteria;p__Proteobacteria;c__Alphaproteobacteria;o__Sphingomonadales;f__Sphingomonadaceae;g__Sphingomonas;s__
OTU_677	2	3	20	0	1	2	48	9	k__Bacteria;p__Proteobacteria;c__Gammaproteobacteria;o__Ga0077536;f__Ga0077536;g__Ga0077536;s__	3	0	1	2	5	0	6	17	35	0	0	0	0	0	2	0	0	6	16	35	92	5	6	15	k__Bacteria;p__Proteobacteria;c__Gammaproteobacteria;o__Ga0077536;f__Ga0077536;g__Ga0077536;s__
OTU_678	0	0	2	0	0	1	38	2	k__Bacteria;p__Planctomycetota;c__Planctomycetes;o__;f__;g__;s__	0	0	0	0	0	0	0	3	1	0	0	0	0	0	0	0	0	2	7	95	10	0	0	6	k__Bacteria;p__Planctomycetota;c__Planctomycetes;o__;f__;g__;s__
OTU_679	0	0	1	2	0	0	13	19	k__Bacteria;p__Planctomycetota;c__Planctomycetes;o__Isosphaerales;f__Isosphaeraceae;g__;s__	0	0	0	0	0	0	1	1	0	4	1	0	0	0	0	0	0	0	2	24	13	2	37	16	k__Bacteria;p__Planctomycetota;c__Planctomycetes;o__Isosphaerales;f__Isosphaeraceae;g__;s__
OTU_680	1	4	1	7	1	4	4	36	k__Bacteria;p__Firmicutes;c__Bacilli;o__Bacillales;f__Bacillaceae;g__Fictibacillus;s__Fictibacillus_phosphorivorans	2	1	0	2	7	1	2	1	0	16	3	0	0	0	2	2	3	6	3	2	6	0	74	33	k__Bacteria;p__Firmicutes;c__Bacilli;o__Bacillales;f__Bacillaceae;g__Fictibacillus;s__Fictibacillus_phosphorivorans
OTU_681	0	0	0	0	45	9	0	0	Unknown	0	0	0	0	0	0	0	0	0	0	0	0	46	0	88	25	0	0	0	0	0	0	0	0	Unknown
OTU_682	1	3	3	47	2	1	1	2	k__Bacteria;p__Firmicutes;c__Clostridia;o__Clostridiales;f__Clostridiaceae;g__Clostridium_sensu_stricto_1;s__Clostridium_perfringens	0	2	0	9	0	0	1	6	0	139	0	1	1	0	5	0	0	1	0	0	1	5	0	0	k__Bacteria;p__Firmicutes;c__Clostridia;o__Clostridiales;f__Clostridiaceae;g__Clostridium_sensu_stricto_1;s__Clostridium_perfringens
OTU_683	0	0	5	1	0	0	40	15	k__Bacteria;p__Acidobacteriota;c__Acidobacteriae;o__Bryobacterales;f__Bryobacteraceae;g__Bryobacter;s__	0	0	0	0	0	0	2	0	11	0	1	0	0	0	0	0	0	0	13	7	98	36	1	7	k__Bacteria;p__Acidobacteriota;c__Acidobacteriae;o__Bryobacterales;f__Bryobacteraceae;g__Bryobacter;s__
OTU_684	0	0	7	3	0	1	15	11	k__Bacteria;p__Proteobacteria;c__Alphaproteobacteria;o__Defluviicoccales;f__;g__;s__	0	0	0	0	0	0	2	9	8	8	0	0	0	0	0	0	0	2	3	19	23	14	12	6	k__Bacteria;p__Proteobacteria;c__Alphaproteobacteria;o__Defluviicoccales;f__;g__;s__
OTU_685	38	25	1	0	6	2	1	7	k__Bacteria;p__Cyanobacteria;c__Cyanobacteriia;o__Cyanobacteriales;f__Chroococcidiopsaceae;g__Chroococcidiopsis_PCC_7203;s__Chroococcidiopsis_sp.	18	15	81	17	20	38	1	0	0	0	0	0	5	1	11	1	3	0	1	0	2	1	5	13	k__Bacteria;p__Cyanobacteria;c__Cyanobacteriia;o__Cyanobacteriales;f__Chroococcidiopsaceae;g__Chroococcidiopsis_PCC_7203;s__Chroococcidiopsis_sp.
OTU_686	0	0	2	0	0	0	35	11	k__Bacteria;p__Planctomycetota;c__Planctomycetes;o__Pirellulales;f__Pirellulaceae;g__;s__	0	0	0	0	0	0	0	3	2	0	0	0	0	0	0	0	0	0	6	69	30	15	4	12	k__Bacteria;p__Planctomycetota;c__Planctomycetes;o__Pirellulales;f__Pirellulaceae;g__;s__
OTU_687	2	1	0	1	1	1	12	19	k__Bacteria;p__Bacteroidota;c__Bacteroidia;o__Chitinophagales;f__Chitinophagaceae;g__;s__Chitinophaga_sp.	5	0	0	1	1	0	0	0	0	1	0	0	0	0	1	0	0	1	2	1	32	0	6	49	k__Bacteria;p__Bacteroidota;c__Bacteroidia;o__Chitinophagales;f__Chitinophagaceae;g__;s__Chitinophaga_sp.
OTU_688	1	0	9	30	0	0	0	0	k__Bacteria	1	0	0	0	0	0	11	16	0	71	18	0	0	0	0	0	0	0	0	0	0	0	0	0	k__Bacteria
OTU_689	0	1	0	0	1	0	1	47	k__Bacteria;p__Proteobacteria;c__Gammaproteobacteria;o__JG36-GS-52;f__JG36-GS-52;g__JG36-GS-52;s__	0	0	0	2	0	0	0	0	0	0	0	0	0	0	1	0	0	0	0	0	2	140	0	1	k__Bacteria;p__Proteobacteria;c__Gammaproteobacteria;o__JG36-GS-52;f__JG36-GS-52;g__JG36-GS-52;s__
OTU_690	755	1549	2172	944	31534	22356	66	44	k__Bacteria;p__Proteobacteria;c__Alphaproteobacteria;o__Rickettsiales;f__Anaplasmataceae;g__Wolbachia	154	92	2017	915	1976	1756	2833	2237	1444	949	1116	765	47903	3846	42852	8457	54028	4581	70	39	87	0	44	88	k__Bacteria;p__Proteobacteria;c__Alphaproteobacteria;o__Rickettsiales;f__Anaplasmataceae;g__Wolbachia
OTU_691	6	11	0	3	0	19	0	0	k__Bacteria;p__Firmicutes;c__Clostridia	0	16	0	0	0	33	0	0	0	0	0	8	0	0	0	0	57	0	0	0	0	0	0	0	k__Bacteria;p__Firmicutes;c__Clostridia
OTU_692	0	44	0	0	0	1	0	0	k__Bacteria	0	0	0	0	0	130	0	0	0	0	0	0	0	0	0	0	1	0	0	0	0	0	0	0	k__Bacteria
OTU_693	4	9	10	4	9	10	2	2	k__Bacteria;p__Proteobacteria;c__Gammaproteobacteria;o__Burkholderiales;f__Methylophilaceae;g__Methylophilus;s__	4	6	1	22	2	3	9	16	4	2	3	7	3	8	16	5	1	24	4	0	2	3	0	1	k__Bacteria;p__Proteobacteria;c__Gammaproteobacteria;o__Burkholderiales;f__Methylophilaceae;g__Methylophilus;s__
OTU_694	1	0	16	0	0	2	45	4	k__Bacteria;p__Proteobacteria;c__Alphaproteobacteria;o__Rhodospirillales;f__Rhodospirillaceae;g__;s__	3	0	0	0	0	0	6	37	3	0	0	0	0	0	0	0	0	6	10	91	34	5	2	4	k__Bacteria;p__Proteobacteria;c__Alphaproteobacteria;o__Rhodospirillales;f__Rhodospirillaceae;g__;s__
OTU_695	0	0	0	0	42	2	0	0	k__Bacteria	0	0	0	0	0	0	0	0	0	0	0	0	126	0	0	4	0	0	0	0	0	0	0	0	k__Bacteria
OTU_696	76	18	2	8	3	26	2	2	k__Bacteria;p__Firmicutes;c__Bacilli;o__Lactobacillales;f__Lactobacillaceae;g__Lactobacillus;s__Lactobacillus_salivarius	124	91	11	29	5	20	1	2	3	3	11	8	3	2	4	14	13	50	1	3	2	0	0	6	k__Bacteria;p__Firmicutes;c__Bacilli;o__Lactobacillales;f__Lactobacillaceae;g__Lactobacillus;s__Lactobacillus_salivarius
OTU_697	12	18	6	7	3	5	40	470	k__Bacteria;p__Chloroflexi;c__Anaerolineae;o__Caldilineales;f__Caldilineaceae;g__;s__	26	0	9	2	0	51	0	2	14	2	19	0	7	0	0	3	6	5	14	10	96	10	142	1256	k__Bacteria;p__Chloroflexi;c__Anaerolineae;o__Caldilineales;f__Caldilineaceae;g__;s__
OTU_698	2	0	18	1	1	1	70	58	k__Bacteria;p__Actinobacteriota;c__Acidimicrobiia;o__Microtrichales;f__;g__;s__	4	2	0	0	0	0	1	48	5	2	1	0	0	0	3	0	0	3	17	143	49	154	8	12	k__Bacteria;p__Actinobacteriota;c__Acidimicrobiia;o__Microtrichales;f__;g__;s__
OTU_699	10	0	0	6	0	2	5	38	k__Bacteria;p__Bdellovibrionota;c__Oligoflexia;o__Oligoflexales;f__;g__;s__	29	0	0	0	0	0	0	0	0	3	15	0	0	0	0	0	0	6	4	9	2	0	10	104	k__Bacteria;p__Bdellovibrionota;c__Oligoflexia;o__Oligoflexales;f__;g__;s__
OTU_700	0	0	1	0	0	0	35	7	k__Bacteria;p__Planctomycetota;c__Planctomycetes;o__Gemmatales;f__Gemmataceae;g__Fimbriiglobus;s__	0	0	0	0	0	0	0	0	3	0	0	0	0	0	0	0	0	0	2	3	99	1	2	18	k__Bacteria;p__Planctomycetota;c__Planctomycetes;o__Gemmatales;f__Gemmataceae;g__Fimbriiglobus;s__
OTU_701	1	11	6	0	0	1	54	10	k__Bacteria;p__Verrucomicrobiota;c__Verrucomicrobiae;o__Opitutales;f__Opitutaceae;g__Lacunisphaera	0	0	2	0	31	1	6	8	4	0	0	0	0	0	0	2	0	1	29	105	28	1	20	8	k__Bacteria;p__Verrucomicrobiota;c__Verrucomicrobiae;o__Opitutales;f__Opitutaceae;g__Lacunisphaera
OTU_702	8	23	0	0	0	8	0	1	k__Bacteria;p__Proteobacteria;c__Alphaproteobacteria;o__Rhodospirillales;f__Rhodospirillaceae;g__Novispirillum;s__Novispirillum_itersonii	8	12	3	3	61	5	0	0	0	0	0	0	0	0	0	22	0	0	0	0	0	0	0	3	k__Bacteria;p__Proteobacteria;c__Alphaproteobacteria;o__Rhodospirillales;f__Rhodospirillaceae;g__Novispirillum;s__Novispirillum_itersonii
OTU_703	6	1	7	8	7	4	2	1	k__Bacteria;p__Proteobacteria;c__Gammaproteobacteria;o__Burkholderiales;f__Comamonadaceae;g__Schlegelella;s__	1	17	0	0	0	1	7	12	0	1	5	18	9	6	5	4	7	0	0	6	0	0	0	1	k__Bacteria;p__Proteobacteria;c__Gammaproteobacteria;o__Burkholderiales;f__Comamonadaceae;g__Schlegelella;s__
OTU_704	1	4	14	0	0	5	5	0	k__Bacteria;p__Firmicutes;c__Desulfotomaculia;o__Desulfotomaculales;f__Desulfotomaculales;g__Pelotomaculum;s__	0	1	0	0	0	10	42	0	0	0	0	0	0	0	0	0	13	0	14	0	0	0	0	0	k__Bacteria;p__Firmicutes;c__Desulfotomaculia;o__Desulfotomaculales;f__Desulfotomaculales;g__Pelotomaculum;s__
OTU_705	0	0	5	1	0	1	38	5	k__Bacteria;p__Chloroflexi;c__Anaerolineae;o__Caldilineales;f__Caldilineaceae;g__;s__	0	0	0	0	0	0	0	0	14	0	1	0	0	0	0	0	0	1	2	8	102	1	4	10	k__Bacteria;p__Chloroflexi;c__Anaerolineae;o__Caldilineales;f__Caldilineaceae;g__;s__
OTU_706	1	4	3	2	1	5	3	15	k__Bacteria;p__Actinobacteriota;c__Actinobacteria;o__Micrococcales;f__Microbacteriaceae;g__Agromyces	2	1	0	2	0	9	4	3	2	3	3	0	0	0	3	5	2	8	1	1	5	12	2	29	k__Bacteria;p__Actinobacteriota;c__Actinobacteria;o__Micrococcales;f__Microbacteriaceae;g__Agromyces
OTU_707	1	0	18	0	0	0	10	0	k__Bacteria;p__Bacteroidota;c__Bacteroidia;o__Bacteroidales;f__Bacteroidetes_vadinHA17;g__Bacteroidetes_vadinHA17;s__	0	1	0	0	0	0	53	0	0	0	0	0	0	0	0	0	0	0	30	0	0	0	0	0	k__Bacteria;p__Bacteroidota;c__Bacteroidia;o__Bacteroidales;f__Bacteroidetes_vadinHA17;g__Bacteroidetes_vadinHA17;s__
OTU_708	1	0	5	1	0	1	58	5	k__Bacteria;p__Planctomycetota;c__Planctomycetes;o__Gemmatales;f__Gemmataceae;g__;s__	0	0	1	0	0	0	0	13	1	0	1	0	0	0	0	0	0	1	3	167	3	0	5	8	k__Bacteria;p__Planctomycetota;c__Planctomycetes;o__Gemmatales;f__Gemmataceae;g__;s__
OTU_709	0	0	7	0	0	2	27	3	k__Bacteria;p__Proteobacteria;c__Alphaproteobacteria;o__Sphingomonadales;f__Sphingomonadaceae;g__Sphingobium;s__	0	0	0	0	0	0	0	0	20	0	0	0	0	0	0	0	0	4	7	2	72	0	2	5	k__Bacteria;p__Proteobacteria;c__Alphaproteobacteria;o__Sphingomonadales;f__Sphingomonadaceae;g__Sphingobium;s__
OTU_710	0	1	1	1	2	1	7	36	k__Bacteria;p__Proteobacteria;c__Alphaproteobacteria;o__Rhizobiales;f__Labraceae;g__Labrys;s__	0	0	0	1	0	1	0	3	0	1	2	0	2	1	1	2	0	1	4	9	6	103	1	2	k__Bacteria;p__Proteobacteria;c__Alphaproteobacteria;o__Rhizobiales;f__Labraceae;g__Labrys;s__
OTU_711	1	2	2	1	2	1	3	16	k__Bacteria;p__Actinobacteriota;c__Acidimicrobiia;o__Microtrichales;f__Ilumatobacteraceae;g__;s__	3	0	0	1	0	3	2	4	0	0	0	2	0	2	2	0	0	1	2	3	3	37	1	10	k__Bacteria;p__Actinobacteriota;c__Acidimicrobiia;o__Microtrichales;f__Ilumatobacteraceae;g__;s__
OTU_712	3	1	0	0	3	2	1	1	k__Bacteria;p__Actinobacteriota;c__Thermoleophilia;o__Gaiellales;f__;g__;s__Gaiella_sp.	3	2	3	0	0	3	0	0	0	0	0	0	1	8	0	0	3	2	1	0	2	2	0	0	k__Bacteria;p__Actinobacteriota;c__Thermoleophilia;o__Gaiellales;f__;g__;s__Gaiella_sp.
OTU_713	1	1	6	0	1	1	10	8	k__Bacteria;p__Proteobacteria;c__Gammaproteobacteria;o__Burkholderiales;f__SC-I-84;g__SC-I-84;s__	1	1	0	0	0	1	0	10	7	0	0	0	0	3	0	0	0	2	0	15	13	23	0	0	k__Bacteria;p__Proteobacteria;c__Gammaproteobacteria;o__Burkholderiales;f__SC-I-84;g__SC-I-84;s__
OTU_715	39	0	0	26	0	0	0	0	k__Bacteria;p__Firmicutes;c__Bacilli;o__Bacillales;f__Bacillaceae;g__Ureibacillus	0	115	0	0	0	0	0	0	0	0	0	76	0	0	0	0	0	0	0	0	0	0	0	0	k__Bacteria;p__Firmicutes;c__Bacilli;o__Bacillales;f__Bacillaceae;g__Ureibacillus
OTU_716	9	0	10	27	0	0	0	0	k__Bacteria	13	4	9	0	0	0	10	12	6	68	10	3	0	0	0	0	0	0	0	0	0	0	0	0	k__Bacteria
OTU_717	1	0	3	0	1	0	40	1	k__Bacteria;p__Planctomycetota;c__Planctomycetes;o__Isosphaerales;f__Isosphaeraceae;g__;s__	0	2	0	0	0	0	0	7	0	0	0	0	1	0	0	0	0	0	4	109	5	0	1	1	k__Bacteria;p__Planctomycetota;c__Planctomycetes;o__Isosphaerales;f__Isosphaeraceae;g__;s__
OTU_718	2	5	2	2	2	1	5	127	k__Bacteria;p__Proteobacteria;c__Alphaproteobacteria;o__Rhodobacterales;f__Rhodobacteraceae;g__Amaricoccus;s__	1	4	0	4	2	9	4	2	0	0	3	1	1	3	2	1	1	1	2	5	7	322	6	52	k__Bacteria;p__Proteobacteria;c__Alphaproteobacteria;o__Rhodobacterales;f__Rhodobacteraceae;g__Amaricoccus;s__
OTU_719	1	1	1	1	2	3	1	5	k__Bacteria;p__Proteobacteria;c__Gammaproteobacteria;o__Burkholderiales;f__SC-I-84;g__SC-I-84;s__	2	0	0	0	0	1	1	1	1	0	2	0	0	4	1	3	3	2	0	0	2	7	2	6	k__Bacteria;p__Proteobacteria;c__Gammaproteobacteria;o__Burkholderiales;f__SC-I-84;g__SC-I-84;s__
OTU_720	0	0	7	0	0	1	25	4	k__Bacteria;p__Proteobacteria;c__Alphaproteobacteria;o__Azospirillales;f__Azospirillaceae;g__;s__	0	0	0	0	0	0	3	14	3	0	0	0	0	0	0	0	0	3	14	45	14	3	3	5	k__Bacteria;p__Proteobacteria;c__Alphaproteobacteria;o__Azospirillales;f__Azospirillaceae;g__;s__
OTU_721	6	2	0	5	0	1	7	22	k__Bacteria	16	0	2	0	0	4	0	0	0	5	8	0	0	0	0	0	0	2	5	4	12	0	5	59	k__Bacteria
OTU_722	2	0	3	1	7	4	0	1	k__Bacteria;p__Proteobacteria;c__Alphaproteobacteria;o__Rhizobiales;f__Rhizobiaceae	2	0	3	0	0	0	2	5	2	1	1	0	13	4	3	4	0	7	0	0	0	0	2	0	k__Bacteria;p__Proteobacteria;c__Alphaproteobacteria;o__Rhizobiales;f__Rhizobiaceae
OTU_723	0	0	3	1	0	0	42	5	k__Bacteria;p__Acidobacteriota;c__Vicinamibacteria;o__Vicinamibacterales;f__Vicinamibacteraceae;g__Luteitalea;s__	0	0	0	0	0	0	0	0	7	0	1	0	0	0	0	0	0	0	4	2	118	3	3	7	k__Bacteria;p__Acidobacteriota;c__Vicinamibacteria;o__Vicinamibacterales;f__Vicinamibacteraceae;g__Luteitalea;s__
OTU_724	3	1	2	15	5	0	0	0	k__Bacteria;p__Actinobacteriota;c__Actinobacteria;o__Corynebacteriales;f__Corynebacteriaceae;g__Lawsonella;s__	0	0	8	2	1	0	2	3	1	39	2	2	14	0	0	0	0	0	0	0	0	0	0	0	k__Bacteria;p__Actinobacteriota;c__Actinobacteria;o__Corynebacteriales;f__Corynebacteriaceae;g__Lawsonella;s__
OTU_725	0	0	22	0	1	1	29	6	k__Bacteria;p__Proteobacteria;c__Alphaproteobacteria;o__Rhodospirillales;f__Rhodospirillaceae;g__;s__	0	0	0	0	0	0	21	20	23	0	0	0	0	2	0	0	0	3	17	31	39	4	1	13	k__Bacteria;p__Proteobacteria;c__Alphaproteobacteria;o__Rhodospirillales;f__Rhodospirillaceae;g__;s__
OTU_726	0	0	0	66	0	0	0	0	k__Bacteria;p__Bacteroidota;c__Bacteroidia;o__Bacteroidales;f__Rikenellaceae;g__Rikenellaceae_RC9_gut_group;s__	0	0	0	0	0	0	0	0	0	197	0	0	0	0	0	0	0	0	0	0	0	0	0	0	k__Bacteria;p__Bacteroidota;c__Bacteroidia;o__Bacteroidales;f__Rikenellaceae;g__Rikenellaceae_RC9_gut_group;s__
OTU_727	0	0	6	1	0	0	18	6	k__Bacteria;p__Proteobacteria;c__Alphaproteobacteria;o__Zavarziniales;f__Zavarziniaceae;g__Zavarzinia;s__Zavarzinia_compransoris	0	0	0	0	0	0	0	0	18	1	0	0	0	0	0	0	0	0	5	1	47	0	7	10	k__Bacteria;p__Proteobacteria;c__Alphaproteobacteria;o__Zavarziniales;f__Zavarziniaceae;g__Zavarzinia;s__Zavarzinia_compransoris
OTU_728	37	4	7	1	6	1	69	48	k__Bacteria;p__Proteobacteria;c__Gammaproteobacteria;o__Burkholderiales;f__Comamonadaceae	4	1	106	7	4	0	1	1	17	1	0	0	17	0	0	0	1	1	30	23	153	117	3	24	k__Bacteria;p__Proteobacteria;c__Gammaproteobacteria;o__Burkholderiales;f__Comamonadaceae
OTU_729	32	2	1	1	2	0	10	3	k__Bacteria;p__Bacteroidota;c__Bacteroidia;o__Chitinophagales;f__Saprospiraceae;g__;s__	22	65	8	1	0	3	1	1	1	0	1	0	1	3	0	0	0	0	8	11	9	0	0	7	k__Bacteria;p__Bacteroidota;c__Bacteroidia;o__Chitinophagales;f__Saprospiraceae;g__;s__
OTU_730	10	23	9	3	3	1	7	6	k__Bacteria;p__Actinobacteriota;c__Actinobacteria;o__Micrococcales;f__Microbacteriaceae;g__Leucobacter	11	8	10	57	4	6	13	3	11	5	1	1	2	1	5	0	0	3	5	1	13	10	1	5	k__Bacteria;p__Actinobacteriota;c__Actinobacteria;o__Micrococcales;f__Microbacteriaceae;g__Leucobacter
OTU_731	0	0	7	5	3	9	0	0	k__Bacteria;p__Desulfobacterota;c__Syntrophobacteria;o__Syntrophobacterales;f__Syntrophobacteraceae	0	0	0	0	0	0	7	8	4	8	3	2	1	3	4	2	3	20	0	0	0	0	0	0	k__Bacteria;p__Desulfobacterota;c__Syntrophobacteria;o__Syntrophobacterales;f__Syntrophobacteraceae
OTU_732	0	0	18	1	1	4	56	6	k__Bacteria;p__Proteobacteria;c__Gammaproteobacteria;o__Xanthomonadales;f__Rhodanobacteraceae;g__Ahniella;s__	0	0	0	0	0	0	0	0	52	0	0	1	1	0	0	0	0	10	14	10	142	0	4	12	k__Bacteria;p__Proteobacteria;c__Gammaproteobacteria;o__Xanthomonadales;f__Rhodanobacteraceae;g__Ahniella;s__
OTU_733	3	0	0	76	3	0	0	0	k__Bacteria;p__Firmicutes;c__Clostridia;o__Clostridia_UCG-014;f__Clostridia_UCG-014;g__Clostridia_UCG-014;s__	0	0	7	0	0	0	0	0	0	228	0	0	7	0	0	0	0	0	0	0	0	0	0	0	k__Bacteria;p__Firmicutes;c__Clostridia;o__Clostridia_UCG-014;f__Clostridia_UCG-014;g__Clostridia_UCG-014;s__
OTU_734	1	0	6	36	4	2	0	1	k__Bacteria;p__Patescibacteria;c__Saccharimonadia;o__Saccharimonadales;f__Saccharimonadaceae;g__TM7x;s__	1	0	0	0	0	0	12	4	0	102	4	1	3	7	1	5	1	0	0	0	0	1	2	0	k__Bacteria;p__Patescibacteria;c__Saccharimonadia;o__Saccharimonadales;f__Saccharimonadaceae;g__TM7x;s__
OTU_735	0	0	3	24	0	0	0	0	Unknown	0	0	0	0	0	0	3	6	0	69	0	3	0	0	0	0	0	0	0	0	0	0	0	0	Unknown
OTU_736	1	4	8	0	2	1	23	1	k__Bacteria;p__Proteobacteria;c__Gammaproteobacteria;o__Burkholderiales;f__Rhodocyclaceae;g__Zoogloea;s__	1	1	0	11	1	0	1	23	0	0	0	0	0	0	4	0	0	1	5	60	3	0	0	1	k__Bacteria;p__Proteobacteria;c__Gammaproteobacteria;o__Burkholderiales;f__Rhodocyclaceae;g__Zoogloea;s__
OTU_737	2	0	2	1	1	1	4	80	k__Bacteria;p__Proteobacteria;c__Alphaproteobacteria;o__Sphingomonadales;f__Sphingomonadaceae;g__Altererythrobacter;s__	6	0	0	0	0	0	2	1	1	0	1	0	0	0	1	0	3	0	3	4	3	215	3	22	k__Bacteria;p__Proteobacteria;c__Alphaproteobacteria;o__Sphingomonadales;f__Sphingomonadaceae;g__Altererythrobacter;s__
OTU_738	2	5	0	3	0	0	2	36	k__Bacteria;p__Proteobacteria;c__Gammaproteobacteria;o__Burkholderiales;f__Rhodocyclaceae	3	2	1	3	12	0	0	0	0	6	1	0	0	0	0	0	0	0	4	0	2	0	85	23	k__Bacteria;p__Proteobacteria;c__Gammaproteobacteria;o__Burkholderiales;f__Rhodocyclaceae
OTU_739	0	0	3	0	0	1	32	2	k__Bacteria;p__Myxococcota;c__Polyangia;o__Polyangiales;f__Phaselicystidaceae;g__Phaselicystis;s__	0	0	0	0	0	0	0	0	9	0	0	0	0	0	0	0	0	2	1	6	88	0	1	4	k__Bacteria;p__Myxococcota;c__Polyangia;o__Polyangiales;f__Phaselicystidaceae;g__Phaselicystis;s__
OTU_740	1	0	3	32	0	0	0	0	k__Bacteria	1	0	0	0	0	0	4	2	1	72	17	5	0	0	0	0	0	0	0	0	0	0	0	0	k__Bacteria
OTU_741	0	0	2	0	0	1	36	2	k__Bacteria;p__Planctomycetota;c__OM190;o__OM190;f__OM190;g__OM190;s__	0	0	0	0	0	0	0	0	6	0	0	0	0	0	0	0	0	2	3	1	103	0	0	4	k__Bacteria;p__Planctomycetota;c__OM190;o__OM190;f__OM190;g__OM190;s__
OTU_742	2	8	5	1	1	2	44	6	k__Bacteria;p__Proteobacteria;c__Gammaproteobacteria;o__Burkholderiales;f__Comamonadaceae	2	2	0	21	2	0	0	3	10	0	2	0	0	0	1	0	0	4	1	28	101	4	0	13	k__Bacteria;p__Proteobacteria;c__Gammaproteobacteria;o__Burkholderiales;f__Comamonadaceae
OTU_743	0	0	8	0	1	1	28	5	k__Bacteria;p__Myxococcota;c__Polyangia;o__Polyangiales;f__Polyangiaceae;g__Pajaroellobacter;s__	0	0	0	0	0	0	22	0	0	0	0	0	0	2	0	0	0	3	70	5	9	7	3	3	k__Bacteria;p__Myxococcota;c__Polyangia;o__Polyangiales;f__Polyangiaceae;g__Pajaroellobacter;s__
OTU_744	4	1	13	1	0	1	15	1	k__Bacteria;p__Proteobacteria;c__Gammaproteobacteria;o__Pseudomonadales;f__Moraxellaceae;g__Cavicella	3	8	0	0	0	1	9	28	0	0	0	1	0	0	0	0	0	3	15	23	5	0	1	1	k__Bacteria;p__Proteobacteria;c__Gammaproteobacteria;o__Pseudomonadales;f__Moraxellaceae;g__Cavicella
OTU_745	0	0	3	107	2	3	0	1	k__Bacteria;p__Bacteroidota;c__Bacteroidia;o__Bacteroidales;f__Bacteroidaceae;g__Bacteroides;s__Bacteroides_caccae	0	0	0	0	0	0	6	2	0	316	0	4	2	0	3	0	7	0	0	0	0	0	2	0	k__Bacteria;p__Bacteroidota;c__Bacteroidia;o__Bacteroidales;f__Bacteroidaceae;g__Bacteroides;s__Bacteroides_caccae
OTU_746	0	3	18	1	0	6	8	0	k__Bacteria;p__Synergistota;c__Synergistia;o__Synergistales;f__Synergistaceae;g__Syner-01;s__	0	0	0	0	0	8	54	0	0	0	0	3	0	0	0	0	16	0	24	0	0	0	0	0	k__Bacteria;p__Synergistota;c__Synergistia;o__Synergistales;f__Synergistaceae;g__Syner-01;s__
OTU_747	0	2	0	0	25	15	0	0	k__Bacteria	0	0	0	0	1	3	0	0	0	0	0	0	23	10	40	1	18	24	0	0	0	0	0	0	k__Bacteria
OTU_748	9	9	27	5	3	9	78	23	k__Bacteria;p__Proteobacteria;c__Alphaproteobacteria;o__Caulobacterales;f__Caulobacteraceae	13	8	6	1	23	2	10	50	19	4	7	2	4	2	3	7	1	17	26	130	78	33	8	26	k__Bacteria;p__Proteobacteria;c__Alphaproteobacteria;o__Caulobacterales;f__Caulobacteraceae
OTU_749	2	1	0	0	2	0	0	0	k__Bacteria;p__Dependentiae;c__Babeliae;o__Babeliales;f__Babeliales;g__Babeliales;s__	0	3	1	1	0	1	0	0	0	0	0	0	0	4	0	0	0	0	0	0	0	0	0	0	k__Bacteria;p__Dependentiae;c__Babeliae;o__Babeliales;f__Babeliales;g__Babeliales;s__
OTU_750	0	1	0	0	0	0	0	109	k__Bacteria;p__Proteobacteria;c__Gammaproteobacteria;o__CCM19a;f__CCM19a;g__CCM19a;s__	0	0	0	1	0	0	0	0	0	0	0	0	0	0	0	0	0	0	0	0	0	326	1	0	k__Bacteria;p__Proteobacteria;c__Gammaproteobacteria;o__CCM19a;f__CCM19a;g__CCM19a;s__
OTU_751	50	1	1	0	2	1	6	0	k__Bacteria;p__Chloroflexi;c__Chloroflexia;o__Chloroflexales;f__Chloroflexaceae	5	2	142	0	1	2	0	0	1	0	0	0	5	0	0	0	0	2	0	0	16	0	0	0	k__Bacteria;p__Chloroflexi;c__Chloroflexia;o__Chloroflexales;f__Chloroflexaceae
OTU_752	0	0	3	0	0	1	41	1	k__Bacteria;p__Bacteroidota;c__Bacteroidia;o__Sphingobacteriales;f__env.OPS_17;g__env.OPS_17;s__	0	0	0	0	0	0	5	0	2	0	0	0	0	0	0	0	0	1	102	6	13	0	0	1	k__Bacteria;p__Bacteroidota;c__Bacteroidia;o__Sphingobacteriales;f__env.OPS_17;g__env.OPS_17;s__
OTU_753	9	0	0	3	14	0	0	0	k__Bacteria;p__Firmicutes;c__Clostridia;o__Lachnospirales;f__Lachnospiraceae;g__CHKCI001;s__	0	0	26	0	0	0	0	0	0	0	7	1	41	0	0	0	0	0	0	0	0	0	0	0	k__Bacteria;p__Firmicutes;c__Clostridia;o__Lachnospirales;f__Lachnospiraceae;g__CHKCI001;s__
OTU_755	10	2	7	1	1	4	34	11	k__Bacteria;p__Firmicutes;c__Bacilli;o__Bacillales;f__Bacillaceae;g__Bacillus;s__Bacillus_thuringiensis	9	14	6	1	2	3	17	2	1	2	1	0	0	1	0	2	0	8	84	8	9	15	7	10	k__Bacteria;p__Firmicutes;c__Bacilli;o__Bacillales;f__Bacillaceae;g__Bacillus;s__Bacillus_thuringiensis
OTU_756	39	3	0	1	0	0	0	1	k__Bacteria;p__Bacteroidota;c__Bacteroidia;o__Cytophagales;f__Spirosomaceae;g__Arcicella	56	53	6	0	1	8	0	0	0	0	1	0	0	0	0	0	0	0	0	0	0	0	0	1	k__Bacteria;p__Bacteroidota;c__Bacteroidia;o__Cytophagales;f__Spirosomaceae;g__Arcicella
OTU_757	0	0	0	0	1	30	1	0	k__Bacteria	0	0	0	0	0	0	0	0	0	0	0	0	0	0	3	0	0	88	1	0	0	0	0	0	k__Bacteria
OTU_758	0	0	0	39	0	0	0	0	k__Bacteria;p__Deferribacterota;c__Deferribacteres;o__Deferribacterales;f__Deferribacteraceae;g__Mucispirillum;s__	0	0	0	0	0	0	0	0	0	115	0	0	0	0	0	0	0	0	0	0	0	0	0	0	k__Bacteria;p__Deferribacterota;c__Deferribacteres;o__Deferribacterales;f__Deferribacteraceae;g__Mucispirillum;s__
OTU_759	0	8	1	1	0	19	0	0	k__Bacteria;p__Firmicutes;c__Clostridia;o__Oscillospirales	0	0	0	0	0	22	2	0	0	0	0	1	0	0	0	0	57	0	0	0	0	0	0	0	k__Bacteria;p__Firmicutes;c__Clostridia;o__Oscillospirales
OTU_760	29	0	1	0	2	0	0	0	k__Bacteria;p__Cyanobacteria;c__Cyanobacteriia;o__Leptolyngbyales;f__Leptolyngbyaceae	0	0	85	0	0	0	1	0	0	0	0	0	4	0	0	0	0	0	0	0	0	0	0	0	k__Bacteria;p__Cyanobacteria;c__Cyanobacteriia;o__Leptolyngbyales;f__Leptolyngbyaceae
OTU_761	0	0	8	3	4	3	0	0	k__Bacteria;p__Bacteroidota;c__Bacteroidia;o__Chitinophagales;f__Chitinophagaceae;g__Edaphobaculum;s__	0	0	0	0	0	0	12	2	8	3	1	5	1	2	9	0	2	5	0	0	0	0	0	0	k__Bacteria;p__Bacteroidota;c__Bacteroidia;o__Chitinophagales;f__Chitinophagaceae;g__Edaphobaculum;s__
OTU_762	37	41	4	4	10	6	8	22	k__Bacteria;p__Proteobacteria;c__Gammaproteobacteria;o__Burkholderiales;f__Rhodocyclaceae;g__Dechloromonas;s__	63	34	12	13	21	87	3	7	1	2	5	4	1	25	4	1	16	0	5	7	11	51	1	12	k__Bacteria;p__Proteobacteria;c__Gammaproteobacteria;o__Burkholderiales;f__Rhodocyclaceae;g__Dechloromonas;s__
OTU_763	2	5	9	2	0	1	56	39	k__Bacteria;p__Acidobacteriota;c__Vicinamibacteria;o__Vicinamibacterales;f__Vicinamibacteraceae;g__Vicinamibacteraceae;s__	5	0	0	14	0	0	0	0	27	1	3	0	0	0	0	0	0	3	4	2	162	101	8	8	k__Bacteria;p__Acidobacteriota;c__Vicinamibacteria;o__Vicinamibacterales;f__Vicinamibacteraceae;g__Vicinamibacteraceae;s__
OTU_764	1	0	1	1	0	0	3	29	k__Bacteria;p__Planctomycetota;c__Planctomycetes;o__Gemmatales;f__Gemmataceae;g__Gemmata;s__	3	0	0	0	0	0	0	1	0	0	2	0	0	0	0	0	0	0	3	1	4	0	9	77	k__Bacteria;p__Planctomycetota;c__Planctomycetes;o__Gemmatales;f__Gemmataceae;g__Gemmata;s__
OTU_765	4	0	2	32	2	2	0	4	k__Bacteria;p__Firmicutes;c__Negativicutes;o__Acidaminococcales;f__Acidaminococcaceae;g__Phascolarctobacterium;s__Phascolarctobacterium_faecium	0	0	12	0	0	0	1	1	2	93	1	2	6	0	0	2	2	0	0	0	0	0	10	0	k__Bacteria;p__Firmicutes;c__Negativicutes;o__Acidaminococcales;f__Acidaminococcaceae;g__Phascolarctobacterium;s__Phascolarctobacterium_faecium
OTU_766	0	0	23	0	0	1	21	0	k__Bacteria;p__Thermotogota;c__Thermotogae;o__Petrotogales;f__Petrotogaceae;g__SC103;s__	0	0	0	0	0	0	68	0	0	0	0	0	0	0	0	0	1	0	61	0	1	0	0	0	k__Bacteria;p__Thermotogota;c__Thermotogae;o__Petrotogales;f__Petrotogaceae;g__SC103;s__
OTU_767	1	0	9	2	1	0	26	17	k__Bacteria;p__Bdellovibrionota;c__Bdellovibrionia;o__Bdellovibrionales;f__Bdellovibrionaceae;g__Bdellovibrio;s__	3	0	0	0	0	0	0	23	3	1	3	0	0	1	0	0	0	0	6	63	7	24	7	20	k__Bacteria;p__Bdellovibrionota;c__Bdellovibrionia;o__Bdellovibrionales;f__Bdellovibrionaceae;g__Bdellovibrio;s__
OTU_769	6	5	1	0	6	2	0	2	k__Bacteria;p__Proteobacteria;c__Gammaproteobacteria;o__Burkholderiales;f__Rhodocyclaceae;g__Azoarcus;s__	5	11	1	7	4	2	1	0	0	0	0	0	0	17	1	1	3	0	0	0	0	0	0	4	k__Bacteria;p__Proteobacteria;c__Gammaproteobacteria;o__Burkholderiales;f__Rhodocyclaceae;g__Azoarcus;s__
OTU_770	1	0	6	0	0	1	29	2	k__Bacteria;p__Myxococcota;c__Polyangia;o__Nannocystales;f__Nannocystaceae;g__Nannocystis	2	0	0	0	0	0	0	0	18	0	0	0	0	0	0	0	0	2	6	1	80	0	0	5	k__Bacteria;p__Myxococcota;c__Polyangia;o__Nannocystales;f__Nannocystaceae;g__Nannocystis
OTU_771	1	0	2	25	2	1	0	0	k__Bacteria;p__Bacteroidota;c__Bacteroidia;o__Bacteroidales;f__Tannerellaceae;g__Parabacteroides;s__Parabacteroides_merdae	0	2	0	0	0	0	4	2	0	70	3	0	1	0	5	1	1	1	0	0	0	0	0	0	k__Bacteria;p__Bacteroidota;c__Bacteroidia;o__Bacteroidales;f__Tannerellaceae;g__Parabacteroides;s__Parabacteroides_merdae
OTU_772	1	0	2	47	0	1	0	0	k__Bacteria;p__Bacteroidota;c__Bacteroidia;o__Bacteroidales;f__Prevotellaceae	1	0	0	0	0	0	0	4	1	133	6	0	0	0	0	0	3	0	0	0	0	0	0	0	k__Bacteria;p__Bacteroidota;c__Bacteroidia;o__Bacteroidales;f__Prevotellaceae
OTU_773	2	0	2	1	0	1	39	4	k__Bacteria;p__Bacteroidota;c__Bacteroidia;o__Sphingobacteriales;f__env.OPS_17;g__env.OPS_17;s__	1	4	0	0	0	0	0	0	4	0	0	2	0	0	0	0	0	2	9	1	106	0	11	1	k__Bacteria;p__Bacteroidota;c__Bacteroidia;o__Sphingobacteriales;f__env.OPS_17;g__env.OPS_17;s__
OTU_774	2	0	0	0	0	0	1	32	k__Bacteria;p__Bacteroidota;c__Bacteroidia;o__Flavobacteriales;f__Flavobacteriaceae;g__Flavobacterium;s__Flavobacterium_sasangense	0	0	4	0	0	0	0	0	0	0	0	0	0	0	0	0	0	0	0	1	2	95	1	0	k__Bacteria;p__Bacteroidota;c__Bacteroidia;o__Flavobacteriales;f__Flavobacteriaceae;g__Flavobacterium;s__Flavobacterium_sasangense
OTU_775	3	1	1	2	1	1	3	24	k__Bacteria;p__Proteobacteria;c__Gammaproteobacteria;o__EV818SWSAP88;f__EV818SWSAP88;g__EV818SWSAP88;s__	6	3	0	0	0	1	1	0	0	0	6	0	3	0	0	0	0	1	1	2	5	2	9	59	k__Bacteria;p__Proteobacteria;c__Gammaproteobacteria;o__EV818SWSAP88;f__EV818SWSAP88;g__EV818SWSAP88;s__
OTU_776	0	0	4	0	0	0	29	13	k__Bacteria;p__Proteobacteria;c__Gammaproteobacteria;o__Burkholderiales;f__SC-I-84;g__SC-I-84;s__	0	0	0	0	0	0	0	12	0	0	0	0	0	0	0	0	0	0	4	75	8	33	0	5	k__Bacteria;p__Proteobacteria;c__Gammaproteobacteria;o__Burkholderiales;f__SC-I-84;g__SC-I-84;s__
OTU_777	1	1	9	2	1	0	19	4	k__Bacteria;p__Actinobacteriota;c__Thermoleophilia;o__Solirubrobacterales;f__67-14;g__67-14;s__	0	3	0	0	2	0	9	16	2	2	0	3	0	0	1	0	0	0	24	29	4	6	1	4	k__Bacteria;p__Actinobacteriota;c__Thermoleophilia;o__Solirubrobacterales;f__67-14;g__67-14;s__
OTU_778	0	0	1	41	0	0	0	0	k__Bacteria;p__Firmicutes;c__Clostridia;o__Oscillospirales;f__Ruminococcaceae;g__Caproiciproducens;s__	0	0	0	0	0	0	1	0	0	121	0	0	0	0	0	0	0	0	0	0	0	0	0	0	k__Bacteria;p__Firmicutes;c__Clostridia;o__Oscillospirales;f__Ruminococcaceae;g__Caproiciproducens;s__
OTU_780	0	0	1	0	0	0	1	57	k__Bacteria;p__Proteobacteria;c__Gammaproteobacteria;o__Burkholderiales;f__Oxalobacteraceae;g__Oxalobacter;s__	0	0	0	0	0	0	0	1	0	0	0	0	0	0	0	0	0	0	1	0	0	171	0	0	k__Bacteria;p__Proteobacteria;c__Gammaproteobacteria;o__Burkholderiales;f__Oxalobacteraceae;g__Oxalobacter;s__
OTU_781	2	2	4	0	1	2	29	9	k__Bacteria;p__Proteobacteria;c__Alphaproteobacteria;o__Acetobacterales;f__Acetobacteraceae	3	2	1	2	0	2	0	12	0	0	0	0	1	1	0	0	1	3	6	78	3	16	1	10	k__Bacteria;p__Proteobacteria;c__Alphaproteobacteria;o__Acetobacterales;f__Acetobacteraceae
OTU_782	2	1	8	3	0	1	32	13	k__Bacteria;p__Proteobacteria;c__Alphaproteobacteria;o__Rhizobiales;f__Hyphomicrobiaceae;g__Pedomicrobium;s__	3	0	2	1	1	0	7	6	10	2	6	0	0	0	0	0	0	3	31	13	52	7	10	22	k__Bacteria;p__Proteobacteria;c__Alphaproteobacteria;o__Rhizobiales;f__Hyphomicrobiaceae;g__Pedomicrobium;s__
OTU_783	2	2	1	0	0	1	23	8	k__Bacteria;p__Bacteroidota;c__Bacteroidia;o__Sphingobacteriales;f__Sphingobacteriaceae;g__Pedobacter;s__Pedobacter_composti	0	6	0	0	3	1	0	3	0	0	0	0	0	0	0	0	0	2	3	62	2	1	13	8	k__Bacteria;p__Bacteroidota;c__Bacteroidia;o__Sphingobacteriales;f__Sphingobacteriaceae;g__Pedobacter;s__Pedobacter_composti
OTU_784	1	9	0	0	0	1	1	21	k__Bacteria;p__Verrucomicrobiota;c__Verrucomicrobiae;o__Verrucomicrobiales;f__Rubritaleaceae;g__Luteolibacter	2	1	0	0	22	4	0	0	0	0	0	0	0	0	0	1	0	0	0	0	1	0	54	8	k__Bacteria;p__Verrucomicrobiota;c__Verrucomicrobiae;o__Verrucomicrobiales;f__Rubritaleaceae;g__Luteolibacter
OTU_785	1	1	3	2	2	8	1	0	k__Bacteria;p__Actinobacteriota;c__Actinobacteria;o__Corynebacteriales;f__Mycobacteriaceae;g__Mycobacterium	2	0	0	1	1	0	4	0	3	0	3	1	1	1	3	3	8	13	0	0	3	0	0	0	k__Bacteria;p__Actinobacteriota;c__Actinobacteria;o__Corynebacteriales;f__Mycobacteriaceae;g__Mycobacterium
OTU_786	0	0	2	0	0	0	32	6	k__Bacteria;p__Planctomycetota;c__Planctomycetes;o__Isosphaerales;f__Isosphaeraceae;g__Aquisphaera;s__	0	0	0	0	0	0	5	0	0	0	0	0	0	0	0	0	0	0	78	12	6	5	1	11	k__Bacteria;p__Planctomycetota;c__Planctomycetes;o__Isosphaerales;f__Isosphaeraceae;g__Aquisphaera;s__
OTU_787	1	0	8	0	0	2	60	10	k__Bacteria;p__Myxococcota;c__Polyangia;o__Polyangiales;f__BIrii41;g__BIrii41;s__	2	0	0	0	0	0	3	0	20	0	0	0	0	0	0	0	0	5	32	8	140	16	7	7	k__Bacteria;p__Myxococcota;c__Polyangia;o__Polyangiales;f__BIrii41;g__BIrii41;s__
OTU_788	2	0	0	19	0	0	0	0	k__Bacteria	2	0	2	0	0	0	0	0	0	57	0	0	0	0	0	0	0	0	0	0	0	0	0	0	k__Bacteria
OTU_789	1	0	4	0	0	1	29	5	k__Bacteria;p__Acidobacteriota;c__Acidobacteriae;o__Bryobacterales;f__Bryobacteraceae;g__Bryobacter;s__Acidobacteria_bacterium	0	1	0	0	0	0	0	0	10	0	0	0	0	0	0	0	0	2	10	2	73	0	5	10	k__Bacteria;p__Acidobacteriota;c__Acidobacteriae;o__Bryobacterales;f__Bryobacteraceae;g__Bryobacter;s__Acidobacteria_bacterium
OTU_790	0	0	1	0	0	0	32	1	k__Bacteria;p__Planctomycetota;c__Planctomycetes;o__Pirellulales;f__Pirellulaceae;g__;s__	0	0	0	0	0	0	0	0	3	0	0	0	0	0	0	0	0	0	4	6	85	0	0	2	k__Bacteria;p__Planctomycetota;c__Planctomycetes;o__Pirellulales;f__Pirellulaceae;g__;s__
OTU_791	3	19	0	5	0	58	0	0	k__Bacteria;p__Firmicutes;c__Clostridia;o__Lachnospirales;f__Lachnospiraceae	0	8	0	0	0	56	0	0	0	0	0	13	0	0	0	0	172	0	0	0	0	0	0	0	k__Bacteria;p__Firmicutes;c__Clostridia;o__Lachnospirales;f__Lachnospiraceae
OTU_792	0	1	4	3	0	1	52	4	k__Bacteria;p__Proteobacteria;c__Gammaproteobacteria;o__Burkholderiales;f__Comamonadaceae	0	0	0	1	0	0	0	0	10	9	0	0	0	0	0	0	0	1	0	2	153	6	3	3	k__Bacteria;p__Proteobacteria;c__Gammaproteobacteria;o__Burkholderiales;f__Comamonadaceae
OTU_793	1	4	4	0	0	1	17	15	k__Bacteria;p__Bacteroidota;c__Bacteroidia;o__Cytophagales;f__Microscillaceae;g__;s__Hassallia_byssoidea	0	1	1	8	2	0	9	0	3	0	0	0	0	0	0	0	0	2	40	3	6	33	4	8	k__Bacteria;p__Bacteroidota;c__Bacteroidia;o__Cytophagales;f__Microscillaceae;g__;s__Hassallia_byssoidea
OTU_794	5	0	8	33	2	2	0	1	k__Bacteria;p__Bacteroidota;c__Bacteroidia;o__Bacteroidales;f__Rikenellaceae;g__Alistipes;s__Alistipes_putredinis	0	0	13	0	0	0	11	5	6	91	7	0	4	1	1	1	3	0	0	0	0	0	3	0	k__Bacteria;p__Bacteroidota;c__Bacteroidia;o__Bacteroidales;f__Rikenellaceae;g__Alistipes;s__Alistipes_putredinis
OTU_795	0	23	0	0	1	1	0	0	Unknown	0	0	0	0	68	1	0	0	0	0	0	0	2	1	0	2	0	0	0	0	0	0	0	0	Unknown
OTU_796	2	10	27	13	11	34	17	23	k__Bacteria;p__Proteobacteria;c__Alphaproteobacteria;o__Acetobacterales;f__Acetobacteraceae;g__Roseomonas	2	1	2	1	24	5	27	32	21	15	9	14	10	10	12	17	17	68	1	29	20	54	13	2	k__Bacteria;p__Proteobacteria;c__Alphaproteobacteria;o__Acetobacterales;f__Acetobacteraceae;g__Roseomonas
OTU_797	0	0	2	13	0	0	0	0	Unknown	0	0	0	0	0	0	4	0	0	36	0	2	0	0	0	0	0	0	0	0	0	0	0	0	Unknown
OTU_799	29	0	1	1	0	0	0	0	k__Bacteria	10	26	51	0	0	0	1	0	0	3	0	0	0	0	0	0	0	0	0	0	0	0	0	0	k__Bacteria
OTU_800	1	0	1	79	0	0	0	0	k__Bacteria;p__Bacteroidota;c__Bacteroidia;o__Bacteroidales;f__Prevotellaceae;g__Alloprevotella	1	0	0	0	0	0	0	2	0	225	10	0	0	0	0	0	0	0	0	0	0	0	0	0	k__Bacteria;p__Bacteroidota;c__Bacteroidia;o__Bacteroidales;f__Prevotellaceae;g__Alloprevotella
OTU_801	1	0	9	13	0	0	0	0	Unknown	2	0	0	0	0	0	0	13	13	22	16	0	0	0	0	0	0	0	0	0	0	0	0	0	Unknown
OTU_802	2	0	9	9	1	0	0	0	k__Bacteria	0	0	6	0	0	0	1	9	16	10	10	6	0	0	1	0	0	0	0	0	0	0	0	0	k__Bacteria
OTU_803	21	0	12	13	0	1	0	0	Unknown	0	63	0	0	0	0	0	28	8	0	1	37	0	0	0	0	1	0	0	0	0	0	0	0	Unknown
OTU_804	1	0	1	4	1	1	2	28	k__Bacteria;p__Firmicutes;c__Clostridia;o__Clostridia;f__Hungateiclostridiaceae;g__Hungateiclostridium;s__	2	0	0	0	0	0	1	0	0	9	3	0	0	1	0	0	0	1	0	1	4	0	68	16	k__Bacteria;p__Firmicutes;c__Clostridia;o__Clostridia;f__Hungateiclostridiaceae;g__Hungateiclostridium;s__
OTU_805	0	0	1	0	0	0	26	1	k__Bacteria;p__Planctomycetota;c__Phycisphaerae;o__Phycisphaerales;f__Phycisphaeraceae;g__SM1A02;s__iron-reducing_bacterium	0	0	0	0	0	0	2	0	0	0	0	0	0	0	0	0	0	0	75	1	0	0	0	1	k__Bacteria;p__Planctomycetota;c__Phycisphaerae;o__Phycisphaerales;f__Phycisphaeraceae;g__SM1A02;s__iron-reducing_bacterium
OTU_806	0	0	0	52	0	0	0	0	k__Bacteria;p__Bacteroidota;c__Bacteroidia;o__Bacteroidales;f__Muribaculaceae;g__Muribaculaceae;s__	0	0	0	0	0	0	0	0	0	155	0	0	0	0	0	0	0	0	0	0	0	0	0	0	k__Bacteria;p__Bacteroidota;c__Bacteroidia;o__Bacteroidales;f__Muribaculaceae;g__Muribaculaceae;s__
OTU_807	0	0	3	0	0	1	24	3	k__Bacteria;p__Chloroflexi;c__Anaerolineae;o__RBG-13-54-9;f__RBG-13-54-9;g__RBG-13-54-9;s__	0	0	0	0	0	0	0	0	7	0	0	0	0	0	0	0	0	1	2	3	65	0	3	4	k__Bacteria;p__Chloroflexi;c__Anaerolineae;o__RBG-13-54-9;f__RBG-13-54-9;g__RBG-13-54-9;s__
OTU_808	6	5	2	2	4	7	0	1	k__Bacteria;p__Desulfobacterota;c__Desulfuromonadia;o__Geobacterales;f__Geobacteraceae;g__Geobacter;s__	12	3	3	2	3	8	1	2	2	3	1	0	0	12	0	4	15	0	0	0	0	1	0	0	k__Bacteria;p__Desulfobacterota;c__Desulfuromonadia;o__Geobacterales;f__Geobacteraceae;g__Geobacter;s__
OTU_809	0	0	2	0	0	2	22	3	k__Bacteria;p__Bacteroidota;c__Bacteroidia	0	0	0	0	0	0	5	0	0	0	0	0	0	0	0	0	0	4	62	0	2	0	1	8	k__Bacteria;p__Bacteroidota;c__Bacteroidia
OTU_810	2	0	0	5	0	2	2	39	k__Bacteria;p__Proteobacteria;c__Gammaproteobacteria;o__Burkholderiales;f__Rhodocyclaceae;g__Uliginosibacterium;s__	4	0	0	0	0	0	0	0	0	15	0	0	0	0	0	2	0	4	3	1	2	4	78	33	k__Bacteria;p__Proteobacteria;c__Gammaproteobacteria;o__Burkholderiales;f__Rhodocyclaceae;g__Uliginosibacterium;s__
OTU_811	1	0	0	4	0	1	3	28	k__Bacteria;p__Acidobacteriota;c__Holophagae;o__Holophagales;f__Holophagaceae;g__Holophagaceae	2	0	0	0	0	0	0	0	0	11	0	0	0	0	0	0	0	2	0	2	5	0	66	17	k__Bacteria;p__Acidobacteriota;c__Holophagae;o__Holophagales;f__Holophagaceae;g__Holophagaceae
OTU_812	2	1	4	1	1	2	36	8	k__Bacteria;p__Gemmatimonadota;c__Gemmatimonadetes;o__Gemmatimonadales;f__Gemmatimonadaceae;g__Gemmatimonas;s__	1	0	3	0	2	0	0	0	11	0	1	0	0	2	0	0	0	4	7	5	96	0	14	9	k__Bacteria;p__Gemmatimonadota;c__Gemmatimonadetes;o__Gemmatimonadales;f__Gemmatimonadaceae;g__Gemmatimonas;s__
OTU_813	1	1	1	0	0	0	28	0	k__Bacteria	1	0	0	0	2	0	0	3	0	0	0	0	0	0	0	0	0	0	6	77	0	0	0	0	k__Bacteria
OTU_814	0	0	0	0	0	0	2	24	k__Bacteria;p__Proteobacteria;c__Alphaproteobacteria;o__Dongiales;f__Dongiaceae;g__Dongia	0	0	0	0	0	0	0	0	0	0	0	0	0	0	0	0	0	0	0	0	4	70	0	0	k__Bacteria;p__Proteobacteria;c__Alphaproteobacteria;o__Dongiales;f__Dongiaceae;g__Dongia
OTU_815	0	0	0	0	0	0	0	1	k__Bacteria;p__Firmicutes;c__Bacilli;o__Lactobacillales;f__Lactobacillaceae;g__Lactobacillus;s__Lactobacillus_curvatus	0	0	0	0	0	0	0	0	0	0	0	0	0	0	0	0	0	0	0	0	0	2	0	0	k__Bacteria;p__Firmicutes;c__Bacilli;o__Lactobacillales;f__Lactobacillaceae;g__Lactobacillus;s__Lactobacillus_curvatus
OTU_816	0	0	1	2	1	0	0	0	Unknown	0	0	0	0	0	0	0	1	0	3	0	1	1	0	0	0	0	0	0	0	0	0	0	0	Unknown
OTU_817	0	1	21	0	0	2	9	0	k__Bacteria;p__Spirochaetota;c__Spirochaetia;o__Spirochaetales;f__Spirochaetaceae;g__Sphaerochaeta;s__	0	0	0	0	0	3	61	0	0	0	0	0	0	0	0	0	4	0	27	0	0	0	0	0	k__Bacteria;p__Spirochaetota;c__Spirochaetia;o__Spirochaetales;f__Spirochaetaceae;g__Sphaerochaeta;s__
OTU_818	0	0	7	30	3	4	1	2	k__Bacteria;p__Firmicutes;c__Clostridia;o__Lachnospirales;f__Lachnospiraceae	0	0	0	0	0	0	9	8	3	86	0	2	1	1	5	1	8	3	1	0	0	0	5	0	k__Bacteria;p__Firmicutes;c__Clostridia;o__Lachnospirales;f__Lachnospiraceae
OTU_819	16	1	3	0	0	0	9	0	k__Bacteria;p__Proteobacteria;c__Gammaproteobacteria;o__Burkholderiales;f__Methylophilaceae;g__;s__	10	36	2	1	0	2	1	6	0	0	0	0	0	0	0	0	0	0	1	13	12	0	0	0	k__Bacteria;p__Proteobacteria;c__Gammaproteobacteria;o__Burkholderiales;f__Methylophilaceae;g__;s__
OTU_820	0	0	7	0	0	0	18	2	k__Bacteria;p__Myxococcota;c__Polyangia;o__Polyangiales;f__Polyangiaceae;g__Pajaroellobacter;s__	0	0	0	0	0	0	14	1	4	0	0	0	0	0	0	0	0	0	36	4	12	0	2	4	k__Bacteria;p__Myxococcota;c__Polyangia;o__Polyangiales;f__Polyangiaceae;g__Pajaroellobacter;s__
OTU_821	6	0	1	8	7	0	0	2	k__Bacteria;p__Firmicutes;c__Clostridia;o__Lachnospirales;f__Lachnospiraceae;g__Ruminococcus_torques_group;s__	0	0	18	0	0	0	1	0	1	23	0	0	20	0	0	0	0	0	0	0	0	2	2	0	k__Bacteria;p__Firmicutes;c__Clostridia;o__Lachnospirales;f__Lachnospiraceae;g__Ruminococcus_torques_group;s__
OTU_822	18	0	1	1	7	0	0	6	k__Bacteria;p__Proteobacteria;c__Gammaproteobacteria;o__Burkholderiales;f__Neisseriaceae;g__Neisseria;s__Neisseria_perflava	4	0	49	0	0	0	2	0	0	3	0	0	20	0	0	0	0	0	0	0	0	16	0	0	k__Bacteria;p__Proteobacteria;c__Gammaproteobacteria;o__Burkholderiales;f__Neisseriaceae;g__Neisseria;s__Neisseria_perflava
OTU_823	0	0	2	0	0	1	34	2	k__Bacteria;p__Proteobacteria;c__Gammaproteobacteria;o__Burkholderiales;f__Comamonadaceae	0	0	0	0	0	0	0	0	5	0	0	0	0	0	0	0	0	1	3	2	97	0	3	1	k__Bacteria;p__Proteobacteria;c__Gammaproteobacteria;o__Burkholderiales;f__Comamonadaceae
OTU_824	0	0	3	0	0	1	17	1	k__Bacteria;p__Proteobacteria;c__Alphaproteobacteria;o__Rhizobiales;f__Beijerinckiaceae	0	0	0	0	0	0	2	5	0	0	0	0	0	0	0	0	0	1	3	41	5	0	2	1	k__Bacteria;p__Proteobacteria;c__Alphaproteobacteria;o__Rhizobiales;f__Beijerinckiaceae
OTU_825	4	3	0	4	1	2	4	17	k__Bacteria;p__Actinobacteriota;c__Thermoleophilia;o__Gaiellales;f__;g__;s__	6	2	3	1	8	0	0	0	0	0	10	0	2	0	0	2	0	3	5	2	3	1	2	48	k__Bacteria;p__Actinobacteriota;c__Thermoleophilia;o__Gaiellales;f__;g__;s__
OTU_826	1	1	3	1	0	2	23	2	k__Bacteria;p__Chloroflexi;c__Chloroflexia;o__Thermomicrobiales;f__JG30-KF-CM45;g__JG30-KF-CM45;s__	2	1	0	0	0	1	1	7	0	0	1	0	0	0	0	0	0	4	19	44	4	3	1	2	k__Bacteria;p__Chloroflexi;c__Chloroflexia;o__Thermomicrobiales;f__JG30-KF-CM45;g__JG30-KF-CM45;s__
OTU_827	1	1	0	1	0	0	3	29	k__Bacteria;p__Chloroflexi;c__Anaerolineae;o__Caldilineales;f__Caldilineaceae;g__;s__	2	0	0	0	0	3	0	0	0	0	1	0	0	0	0	0	0	0	7	1	0	0	10	77	k__Bacteria;p__Chloroflexi;c__Anaerolineae;o__Caldilineales;f__Caldilineaceae;g__;s__
OTU_828	0	0	14	0	0	3	5	0	k__Bacteria;p__Patescibacteria;c__Saccharimonadia;o__Saccharimonadales;f__Saccharimonadaceae;g__TM7a;s__	0	0	0	0	0	0	41	0	0	0	0	0	0	0	0	0	8	0	14	0	0	0	0	0	k__Bacteria;p__Patescibacteria;c__Saccharimonadia;o__Saccharimonadales;f__Saccharimonadaceae;g__TM7a;s__
OTU_829	19	3	4	1	1	1	12	3	k__Bacteria;p__Proteobacteria;c__Gammaproteobacteria;o__Burkholderiales;f__Oxalobacteraceae;g__Undibacterium;s__	12	32	13	4	2	2	8	0	3	0	0	3	2	0	1	3	0	0	23	4	9	0	0	7	k__Bacteria;p__Proteobacteria;c__Gammaproteobacteria;o__Burkholderiales;f__Oxalobacteraceae;g__Undibacterium;s__
OTU_830	2	0	0	1	0	0	2	27	k__Bacteria;p__Acidobacteriota;c__Acidobacteriae;o__Acidobacteriae;f__Acidobacteriae;g__Paludibaculum;s__	4	0	0	0	0	0	0	0	0	1	1	0	0	0	0	0	0	0	2	1	1	0	49	30	k__Bacteria;p__Acidobacteriota;c__Acidobacteriae;o__Acidobacteriae;f__Acidobacteriae;g__Paludibaculum;s__
OTU_831	1	12	0	0	11	3	0	0	k__Bacteria	0	1	0	35	0	0	0	0	0	0	0	0	27	0	5	7	0	0	0	0	0	0	0	0	k__Bacteria
OTU_832	10	4	17	36	10	6	1	7	k__Bacteria;p__Firmicutes;c__Bacilli;o__Staphylococcales;f__Staphylococcaceae;g__Staphylococcus	18	1	11	1	7	2	33	10	8	52	41	15	17	4	8	1	14	1	0	1	0	7	0	14	k__Bacteria;p__Firmicutes;c__Bacilli;o__Staphylococcales;f__Staphylococcaceae;g__Staphylococcus
OTU_833	0	0	6	1	1	2	33	7	k__Bacteria;p__Chloroflexi;c__Chloroflexia;o__Thermomicrobiales;f__JG30-KF-CM45;g__JG30-KF-CM45;s__	0	0	0	0	0	0	8	9	1	0	1	0	2	0	0	0	0	5	36	56	7	1	4	14	k__Bacteria;p__Chloroflexi;c__Chloroflexia;o__Thermomicrobiales;f__JG30-KF-CM45;g__JG30-KF-CM45;s__
OTU_834	0	0	1	0	0	0	29	0	k__Bacteria;p__Planctomycetota;c__Planctomycetes;o__Planctomycetales;f__Schlesneriaceae;g__Schlesneria;s__	0	0	0	0	0	0	2	0	0	0	0	0	0	0	0	0	0	0	83	1	2	0	0	0	k__Bacteria;p__Planctomycetota;c__Planctomycetes;o__Planctomycetales;f__Schlesneriaceae;g__Schlesneria;s__
OTU_835	9	2	1	3	3	1	1	17	k__Bacteria;p__Proteobacteria;c__Gammaproteobacteria;o__Pseudomonadales;f__Moraxellaceae;g__Acinetobacter;s__Acinetobacter_soli	0	0	26	1	1	3	1	0	0	6	0	1	6	0	1	0	3	0	0	0	1	49	0	0	k__Bacteria;p__Proteobacteria;c__Gammaproteobacteria;o__Pseudomonadales;f__Moraxellaceae;g__Acinetobacter;s__Acinetobacter_soli
OTU_836	18	11	14	9	8	9	5	8	k__Bacteria;p__Actinobacteriota;c__Actinobacteria;o__Micrococcales;f__Microbacteriaceae;g__Microbacterium	25	17	12	21	3	9	19	13	8	4	10	12	7	1	15	2	4	19	5	1	8	5	1	17	k__Bacteria;p__Actinobacteriota;c__Actinobacteria;o__Micrococcales;f__Microbacteriaceae;g__Microbacterium
OTU_837	119	20	18	4	1	4	169	64	k__Bacteria;p__Proteobacteria;c__Gammaproteobacteria;o__Burkholderiales;f__Comamonadaceae	270	52	34	6	12	41	24	17	13	0	11	1	2	1	0	0	3	7	238	165	102	44	19	129	k__Bacteria;p__Proteobacteria;c__Gammaproteobacteria;o__Burkholderiales;f__Comamonadaceae
OTU_838	2	5	4	41	3	4	1	11	k__Bacteria;p__Proteobacteria;c__Alphaproteobacteria;o__Sphingomonadales;f__Sphingomonadaceae;g__MN_122.2a;s__	0	5	0	1	12	2	4	4	3	118	3	1	3	1	5	2	2	7	1	1	0	7	16	8	k__Bacteria;p__Proteobacteria;c__Alphaproteobacteria;o__Sphingomonadales;f__Sphingomonadaceae;g__MN_122.2a;s__
OTU_839	1	0	0	1	0	0	1	26	k__Bacteria;p__Bacteroidota;c__Kapabacteria;o__Kapabacteriales;f__Kapabacteriales;g__Kapabacteriales;s__	2	0	0	0	0	0	0	0	0	3	0	0	0	0	0	0	0	0	1	0	0	0	61	17	k__Bacteria;p__Bacteroidota;c__Kapabacteria;o__Kapabacteriales;f__Kapabacteriales;g__Kapabacteriales;s__
OTU_840	0	0	0	29	0	0	0	0	k__Bacteria;p__Bacteroidota;c__Bacteroidia;o__Bacteroidales;f__Marinifilaceae;g__Odoribacter;s__Odoribacter_sp.	0	0	0	0	0	0	0	0	0	87	0	0	0	0	0	0	0	0	0	0	0	0	0	0	k__Bacteria;p__Bacteroidota;c__Bacteroidia;o__Bacteroidales;f__Marinifilaceae;g__Odoribacter;s__Odoribacter_sp.
OTU_841	1	0	0	3	0	0	0	1	k__Bacteria;p__Firmicutes;c__Clostridia;o__Lachnospirales;f__Lachnospiraceae;g__Blautia;s__Lachnospiraceae_bacterium	2	0	0	0	0	0	0	0	0	8	0	0	0	0	0	0	0	0	0	0	0	0	0	1	k__Bacteria;p__Firmicutes;c__Clostridia;o__Lachnospirales;f__Lachnospiraceae;g__Blautia;s__Lachnospiraceae_bacterium
OTU_842	0	1	0	0	0	10	0	0	Unknown	0	0	0	1	0	0	0	0	0	0	0	0	0	0	0	1	3	24	0	0	0	0	0	0	Unknown
OTU_843	3	2	0	0	2	0	1	0	k__Bacteria;p__Firmicutes;c__Bacilli	1	2	6	2	1	1	0	0	0	0	0	0	1	5	0	0	0	0	0	0	2	0	0	0	k__Bacteria;p__Firmicutes;c__Bacilli
OTU_844	3	6	13	0	6	3	63	13	k__Bacteria;p__Acidobacteriota;c__Blastocatellia	7	2	0	14	1	2	7	0	30	0	0	0	0	0	17	0	0	7	18	7	163	17	3	18	k__Bacteria;p__Acidobacteriota;c__Blastocatellia
OTU_845	1	10	0	1	32	35	0	0	k__Bacteria	0	0	1	10	8	11	0	0	0	0	1	0	58	9	28	10	89	6	0	0	0	0	0	0	k__Bacteria
OTU_846	1	0	0	2	0	0	3	36	k__Bacteria;p__Bacteroidota;c__Bacteroidia;o__Cytophagales;f__Microscillaceae;g__Ohtaekwangia;s__	0	0	1	0	0	0	0	0	0	4	0	0	0	0	0	0	0	0	4	2	1	1	81	24	k__Bacteria;p__Bacteroidota;c__Bacteroidia;o__Cytophagales;f__Microscillaceae;g__Ohtaekwangia;s__
OTU_847	4	4	2	2	0	3	5	15	k__Bacteria;p__Proteobacteria;c__Alphaproteobacteria;o__Rhizobiales;f__Hyphomicrobiaceae;g__Hyphomicrobium;s__	8	1	2	2	0	9	1	3	0	0	4	1	0	0	0	0	4	5	3	1	10	2	3	39	k__Bacteria;p__Proteobacteria;c__Alphaproteobacteria;o__Rhizobiales;f__Hyphomicrobiaceae;g__Hyphomicrobium;s__
OTU_848	25	1	0	2	0	0	3	20	k__Bacteria;p__Chloroflexi;c__Chloroflexia;o__Chloroflexales;f__Chloroflexaceae	1	1	71	0	2	1	0	0	0	3	1	0	0	0	0	0	0	0	4	1	2	0	45	13	k__Bacteria;p__Chloroflexi;c__Chloroflexia;o__Chloroflexales;f__Chloroflexaceae
OTU_849	0	0	12	0	0	0	4	1	k__Bacteria;p__Proteobacteria;c__Alphaproteobacteria;o__Sneathiellales;f__Sneathiellaceae;g__Sneathiella;s__	0	0	0	0	0	0	36	0	0	0	0	0	0	0	0	0	0	0	11	0	0	0	0	1	k__Bacteria;p__Proteobacteria;c__Alphaproteobacteria;o__Sneathiellales;f__Sneathiellaceae;g__Sneathiella;s__
OTU_850	10	4	6	5	2	9	1	2	k__Bacteria;p__Proteobacteria;c__Gammaproteobacteria;o__Burkholderiales;f__Burkholderiaceae;g__Ralstonia;s__Ralstonia_insidiosa	11	17	2	1	8	1	9	5	2	1	11	3	1	0	3	12	4	10	1	0	1	0	0	4	k__Bacteria;p__Proteobacteria;c__Gammaproteobacteria;o__Burkholderiales;f__Burkholderiaceae;g__Ralstonia;s__Ralstonia_insidiosa
OTU_851	0	0	0	18	0	0	0	0	k__Bacteria	0	0	0	0	0	0	0	0	0	48	4	0	0	0	0	0	0	0	0	0	0	0	0	0	k__Bacteria
OTU_852	4	21	0	0	5	0	0	0	k__Bacteria;p__Bacteroidota;c__Bacteroidia;o__Chitinophagales;f__Chitinophagaceae;g__Edaphobaculum;s__	9	3	0	57	4	1	0	0	0	0	0	0	0	0	13	0	0	0	0	0	0	0	0	0	k__Bacteria;p__Bacteroidota;c__Bacteroidia;o__Chitinophagales;f__Chitinophagaceae;g__Edaphobaculum;s__
OTU_853	0	0	0	0	0	0	0	40	k__Bacteria;p__Bacteroidota;c__Bacteroidia;o__Chitinophagales;f__Saprospiraceae;g__;s__	0	0	0	0	0	0	0	0	0	0	0	0	0	0	0	0	0	0	0	0	0	119	0	0	k__Bacteria;p__Bacteroidota;c__Bacteroidia;o__Chitinophagales;f__Saprospiraceae;g__;s__
OTU_854	7	1	7	1	1	4	14	2	k__Bacteria;p__Proteobacteria;c__Gammaproteobacteria;o__Salinisphaerales;f__Solimonadaceae;g__Nevskia;s__	3	0	16	0	1	2	17	1	1	1	0	0	3	0	0	2	0	9	31	8	1	0	1	3	k__Bacteria;p__Proteobacteria;c__Gammaproteobacteria;o__Salinisphaerales;f__Solimonadaceae;g__Nevskia;s__
OTU_855	0	19	0	0	0	7	0	0	Unknown	0	0	0	0	0	56	0	0	0	0	0	0	0	0	0	0	0	21	0	0	0	0	0	0	Unknown
OTU_856	0	0	17	0	0	3	68	5	k__Bacteria;p__Proteobacteria;c__Gammaproteobacteria;o__Burkholderiales;f__Nitrosomonadaceae;g__MND1;s__	0	0	0	0	0	0	3	3	43	0	0	0	0	0	0	0	0	8	15	11	178	1	6	8	k__Bacteria;p__Proteobacteria;c__Gammaproteobacteria;o__Burkholderiales;f__Nitrosomonadaceae;g__MND1;s__
OTU_857	0	0	3	0	0	0	26	3	k__Bacteria;p__Verrucomicrobiota;c__Chlamydiae;o__Chlamydiales	0	0	0	0	0	0	0	0	9	0	0	0	0	0	0	0	0	0	2	1	74	6	2	0	k__Bacteria;p__Verrucomicrobiota;c__Chlamydiae;o__Chlamydiales
OTU_858	0	0	0	0	0	15	0	0	Unknown	0	0	0	0	0	0	0	0	0	0	0	0	0	0	0	0	0	44	0	0	0	0	0	0	Unknown
OTU_859	3	0	11	0	0	3	25	5	k__Bacteria;p__Actinobacteriota;c__Thermoleophilia;o__Solirubrobacterales;f__67-14;g__67-14;s__Solirubrobacterales_bacterium	3	4	1	0	0	0	18	10	3	0	0	0	0	0	0	1	0	6	53	12	10	9	3	3	k__Bacteria;p__Actinobacteriota;c__Thermoleophilia;o__Solirubrobacterales;f__67-14;g__67-14;s__Solirubrobacterales_bacterium
OTU_860	1	3	6	1	0	5	3	0	k__Bacteria;p__Firmicutes;c__Clostridia;o__Clostridia;f__Hungateiclostridiaceae;g__Fastidiosipila;s__	0	3	0	0	0	7	18	0	0	0	0	1	0	0	0	0	15	0	7	0	0	0	0	0	k__Bacteria;p__Firmicutes;c__Clostridia;o__Clostridia;f__Hungateiclostridiaceae;g__Fastidiosipila;s__
OTU_861	6	2	1	1	8	1	0	1	k__Bacteria;p__Desulfobacterota;c__Desulfobulbia;o__Desulfobulbales;f__Desulfobulbaceae;g__Desulfobulbus	6	9	2	1	3	1	2	0	0	1	0	0	0	21	2	0	2	0	0	0	0	0	2	0	k__Bacteria;p__Desulfobacterota;c__Desulfobulbia;o__Desulfobulbales;f__Desulfobulbaceae;g__Desulfobulbus
OTU_862	3	0	4	10	1	0	0	0	k__Bacteria	0	1	7	0	0	0	7	4	0	30	0	0	2	0	0	0	0	0	0	0	0	0	0	0	k__Bacteria
OTU_863	0	0	0	2	0	1	1	26	k__Bacteria;p__Patescibacteria;c__Gracilibacteria	0	0	0	0	0	0	0	0	0	5	0	0	0	0	0	0	0	2	2	1	0	0	60	18	k__Bacteria;p__Patescibacteria;c__Gracilibacteria
OTU_864	0	0	3	0	0	1	21	5	k__Bacteria;p__Myxococcota;c__Polyangia;o__Polyangiales;f__Sandaracinaceae;g__	0	0	0	0	0	0	0	0	9	0	0	0	0	0	0	0	0	2	9	3	51	5	4	6	k__Bacteria;p__Myxococcota;c__Polyangia;o__Polyangiales;f__Sandaracinaceae;g__
OTU_865	1	0	21	1	1	1	7	0	k__Bacteria;p__Gemmatimonadota;c__Gemmatimonadetes;o__Gemmatimonadales;f__Gemmatimonadaceae	2	0	0	0	0	0	61	0	0	1	2	0	0	1	0	1	0	0	21	0	0	0	0	0	k__Bacteria;p__Gemmatimonadota;c__Gemmatimonadetes;o__Gemmatimonadales;f__Gemmatimonadaceae
OTU_866	1	3	28	1	0	2	11	0	k__Bacteria;p__Firmicutes;c__Syntrophomonadia;o__Syntrophomonadales;f__Syntrophomonadaceae;g__Syntrophomonas;s__	0	3	0	0	0	9	83	0	0	0	0	2	0	0	0	0	5	0	33	0	0	0	0	0	k__Bacteria;p__Firmicutes;c__Syntrophomonadia;o__Syntrophomonadales;f__Syntrophomonadaceae;g__Syntrophomonas;s__
OTU_867	1	1	3	0	0	1	39	2	k__Bacteria;p__Planctomycetota;c__Planctomycetes;o__Pirellulales;f__Pirellulaceae;g__;s__	1	0	0	1	0	1	0	9	0	0	0	0	0	0	0	0	0	3	2	96	18	1	0	3	k__Bacteria;p__Planctomycetota;c__Planctomycetes;o__Pirellulales;f__Pirellulaceae;g__;s__
OTU_868	3	18	1	1	1	5	2	13	k__Bacteria;p__Actinobacteriota;c__Actinobacteria;o__Micromonosporales;f__Micromonosporaceae;g__Micromonospora	5	1	1	6	43	5	3	0	0	2	0	0	0	0	1	14	0	0	4	0	1	31	3	3	k__Bacteria;p__Actinobacteriota;c__Actinobacteria;o__Micromonosporales;f__Micromonosporaceae;g__Micromonospora
OTU_869	0	0	3	0	0	2	12	3	k__Bacteria;p__Proteobacteria;c__Alphaproteobacteria;o__Elsterales;f__;g__;s__	0	0	0	0	0	0	0	0	8	0	0	0	0	0	0	0	0	4	7	3	25	5	2	0	k__Bacteria;p__Proteobacteria;c__Alphaproteobacteria;o__Elsterales;f__;g__;s__
OTU_870	0	0	0	37	0	0	0	0	k__Bacteria;p__Bacteroidota;c__Bacteroidia;o__Bacteroidales;f__Muribaculaceae;g__Muribaculaceae;s__	0	0	0	0	0	0	0	0	0	109	0	0	0	0	0	0	0	0	0	0	0	0	0	0	k__Bacteria;p__Bacteroidota;c__Bacteroidia;o__Bacteroidales;f__Muribaculaceae;g__Muribaculaceae;s__
OTU_871	0	0	6	0	0	0	22	1	k__Bacteria;p__Bdellovibrionota;c__Oligoflexia;o__0319-6G20;f__0319-6G20;g__0319-6G20;s__	0	0	0	0	0	0	0	0	18	0	0	0	0	0	0	0	0	0	2	2	61	0	1	2	k__Bacteria;p__Bdellovibrionota;c__Oligoflexia;o__0319-6G20;f__0319-6G20;g__0319-6G20;s__
OTU_872	3	10	0	2	0	3	1	9	k__Bacteria;p__Proteobacteria;c__Alphaproteobacteria;o__Micavibrionales;f__;g__;s__	1	4	3	1	24	4	0	0	0	6	0	0	0	0	0	5	0	2	3	0	0	0	23	4	k__Bacteria;p__Proteobacteria;c__Alphaproteobacteria;o__Micavibrionales;f__;g__;s__
OTU_873	1	4	0	3	1	0	1	30	k__Bacteria;p__Gemmatimonadota;c__Gemmatimonadetes;o__Gemmatimonadales;f__Gemmatimonadaceae;g__Gemmatimonas;s__	0	1	0	0	11	0	0	0	0	6	2	1	1	0	0	0	0	0	2	0	0	0	76	12	k__Bacteria;p__Gemmatimonadota;c__Gemmatimonadetes;o__Gemmatimonadales;f__Gemmatimonadaceae;g__Gemmatimonas;s__
OTU_874	0	1	1	1	0	1	2	12	k__Bacteria;p__Bacteroidota;c__Kapabacteria;o__Kapabacteriales;f__Kapabacteriales;g__Kapabacteriales;s__	0	0	0	0	3	0	0	0	2	1	2	0	0	0	0	0	0	1	2	1	3	0	28	6	k__Bacteria;p__Bacteroidota;c__Kapabacteria;o__Kapabacteriales;f__Kapabacteriales;g__Kapabacteriales;s__
OTU_875	2	3	35	0	0	10	14	0	k__Bacteria;p__Firmicutes;c__Syntrophomonadia;o__Syntrophomonadales;f__Syntrophomonadaceae;g__;s__	0	4	0	0	0	7	105	0	0	0	0	0	0	0	0	0	28	0	42	0	0	0	0	0	k__Bacteria;p__Firmicutes;c__Syntrophomonadia;o__Syntrophomonadales;f__Syntrophomonadaceae;g__;s__
OTU_876	1	4	0	1	1	1	0	21	k__Bacteria;p__Actinobacteriota;c__Acidimicrobiia;o__Microtrichales;f__Iamiaceae;g__Iamia;s__	1	0	0	7	3	1	0	0	0	0	2	0	0	2	1	0	1	2	0	0	0	63	0	0	k__Bacteria;p__Actinobacteriota;c__Acidimicrobiia;o__Microtrichales;f__Iamiaceae;g__Iamia;s__
OTU_877	0	18	0	0	1	1	0	0	Unknown	0	0	0	51	0	2	0	0	0	0	0	0	0	0	1	1	0	0	0	0	0	0	0	0	Unknown
OTU_878	0	0	0	0	0	0	0	31	k__Bacteria;p__Sumerlaeota;c__Sumerlaeia;o__Sumerlaeales;f__Sumerlaeaceae;g__Sumerlaea;s__	0	0	0	0	0	0	0	0	0	0	0	0	0	0	0	0	0	0	0	0	0	91	0	0	k__Bacteria;p__Sumerlaeota;c__Sumerlaeia;o__Sumerlaeales;f__Sumerlaeaceae;g__Sumerlaea;s__
OTU_879	0	0	4	0	0	1	19	4	k__Bacteria;p__Proteobacteria;c__Alphaproteobacteria;o__;f__;g__;s__	0	0	0	0	0	0	0	0	11	0	0	0	0	0	0	0	0	1	4	2	50	4	2	4	k__Bacteria;p__Proteobacteria;c__Alphaproteobacteria;o__;f__;g__;s__
OTU_880	0	0	3	33	0	1	0	0	k__Bacteria;p__Firmicutes;c__Bacilli;o__Erysipelotrichales;f__Erysipelotrichaceae;g__Turicibacter;s__	0	0	0	0	0	0	2	0	5	97	0	1	0	0	0	0	3	0	0	0	0	0	0	0	k__Bacteria;p__Firmicutes;c__Bacilli;o__Erysipelotrichales;f__Erysipelotrichaceae;g__Turicibacter;s__
OTU_881	0	0	1	52	1	0	0	0	k__Bacteria;p__Proteobacteria;c__Gammaproteobacteria;o__Burkholderiales;f__Sutterellaceae;g__Parasutterella;s__Burkholderiales_bacterium	0	0	0	0	0	0	0	1	0	154	0	0	1	0	1	0	0	0	0	0	0	0	0	0	k__Bacteria;p__Proteobacteria;c__Gammaproteobacteria;o__Burkholderiales;f__Sutterellaceae;g__Parasutterella;s__Burkholderiales_bacterium
OTU_882	0	0	4	0	0	1	34	3	k__Bacteria	0	0	0	0	0	0	0	0	10	0	0	0	0	0	0	0	0	1	4	2	95	0	4	5	k__Bacteria
OTU_883	0	0	2	0	0	0	26	1	k__Bacteria;p__Planctomycetota;c__Planctomycetes;o__Pirellulales;f__Pirellulaceae;g__Pirellula;s__	0	0	0	0	0	0	1	3	0	0	0	0	0	0	0	0	0	0	7	67	4	0	2	1	k__Bacteria;p__Planctomycetota;c__Planctomycetes;o__Pirellulales;f__Pirellulaceae;g__Pirellula;s__
OTU_884	0	0	7	13	2	5	0	2	k__Bacteria;p__Firmicutes;c__Clostridia;o__Lachnospirales;f__Lachnospiraceae;g__Lachnospira;s__	0	0	0	0	0	0	13	5	3	26	7	6	3	1	2	2	3	8	0	0	0	1	1	4	k__Bacteria;p__Firmicutes;c__Clostridia;o__Lachnospirales;f__Lachnospiraceae;g__Lachnospira;s__
OTU_885	27	0	0	0	1	0	0	0	Unknown	30	27	22	0	0	0	0	0	0	0	0	0	2	0	0	0	0	0	0	0	0	0	0	0	Unknown
OTU_886	4	1	7	1	2	1	18	12	k__Bacteria;p__Actinobacteriota;c__Actinobacteria;o__Frankiales;f__Sporichthyaceae;g__Sporichthya;s__	2	8	0	0	2	0	0	15	5	0	1	0	1	3	0	0	0	3	3	38	11	28	1	5	k__Bacteria;p__Actinobacteriota;c__Actinobacteria;o__Frankiales;f__Sporichthyaceae;g__Sporichthya;s__
OTU_887	0	0	6	0	0	1	25	7	k__Bacteria;p__Proteobacteria;c__Gammaproteobacteria;o__Cellvibrionales;f__Spongiibacteraceae;g__BD1-7_clade;s__	0	0	0	0	0	0	0	0	18	0	0	0	0	0	0	0	0	2	5	6	63	5	5	10	k__Bacteria;p__Proteobacteria;c__Gammaproteobacteria;o__Cellvibrionales;f__Spongiibacteraceae;g__BD1-7_clade;s__
OTU_888	1	1	11	1	1	6	24	5	k__Bacteria;p__Actinobacteriota;c__Actinobacteria;o__Micrococcales;f__Microbacteriaceae;g__Agromyces;s__Agromyces_mediolanus	0	1	0	1	1	0	28	0	4	0	1	0	0	1	1	3	3	10	61	6	3	0	5	10	k__Bacteria;p__Actinobacteriota;c__Actinobacteria;o__Micrococcales;f__Microbacteriaceae;g__Agromyces;s__Agromyces_mediolanus
OTU_889	0	0	1	0	1	0	0	0	k__Bacteria;p__Proteobacteria;c__Gammaproteobacteria;o__Burkholderiales;f__Rhodocyclaceae;g__Candidatus_Accumulibacter;s__	0	0	0	0	0	0	0	1	0	0	0	0	1	0	0	0	0	0	0	0	0	0	0	0	k__Bacteria;p__Proteobacteria;c__Gammaproteobacteria;o__Burkholderiales;f__Rhodocyclaceae;g__Candidatus_Accumulibacter;s__
OTU_890	1	0	10	1	0	2	44	4	k__Bacteria;p__Proteobacteria;c__Gammaproteobacteria;o__Burkholderiales;f__TRA3-20;g__TRA3-20;s__	3	0	0	0	0	0	2	12	16	0	1	0	0	0	0	0	0	4	8	37	85	0	5	6	k__Bacteria;p__Proteobacteria;c__Gammaproteobacteria;o__Burkholderiales;f__TRA3-20;g__TRA3-20;s__
OTU_891	1	1	1	2	1	2	1	17	k__Bacteria;p__Bacteroidota;c__Bacteroidia;o__Cytophagales;f__Microscillaceae;g__Flexibacter;s__	3	0	0	2	1	0	1	0	1	6	0	0	2	0	1	0	0	4	0	0	2	2	37	10	k__Bacteria;p__Bacteroidota;c__Bacteroidia;o__Cytophagales;f__Microscillaceae;g__Flexibacter;s__
OTU_892	0	0	3	0	0	1	14	3	k__Bacteria;p__Proteobacteria;c__Alphaproteobacteria;o__;f__;g__;s__	0	0	0	0	0	0	2	0	6	0	0	0	0	0	0	0	0	2	4	0	38	2	0	6	k__Bacteria;p__Proteobacteria;c__Alphaproteobacteria;o__;f__;g__;s__
OTU_893	0	0	13	4	0	0	0	0	k__Bacteria	0	0	0	0	0	0	0	37	0	1	10	0	0	0	0	0	0	0	0	0	0	0	0	0	k__Bacteria
OTU_894	0	1	0	1	0	0	1	22	k__Bacteria;p__Planctomycetota;c__Planctomycetes;o__Gemmatales;f__Gemmataceae;g__Fimbriiglobus	0	0	0	0	3	0	0	0	0	3	0	0	0	0	0	0	0	0	0	0	2	0	45	21	k__Bacteria;p__Planctomycetota;c__Planctomycetes;o__Gemmatales;f__Gemmataceae;g__Fimbriiglobus
OTU_895	0	0	0	15	0	0	0	0	Unknown	0	0	0	0	0	0	0	0	0	40	3	0	0	0	0	0	0	0	0	0	0	0	0	0	Unknown
OTU_896	15	3	62	2	1	4	220	18	k__Bacteria;p__Actinobacteriota;c__Thermoleophilia;o__Solirubrobacterales	14	30	1	4	2	2	5	160	19	0	0	5	1	0	0	0	0	11	45	523	90	0	18	36	k__Bacteria;p__Actinobacteriota;c__Thermoleophilia;o__Solirubrobacterales
OTU_897	0	1	2	0	1	0	11	18	k__Bacteria;p__Bdellovibrionota;c__Bdellovibrionia;o__Bdellovibrionales;f__Bdellovibrionaceae;g__Bdellovibrio	0	0	0	0	3	0	4	0	1	0	0	0	0	2	0	0	0	0	24	0	9	48	1	5	k__Bacteria;p__Bdellovibrionota;c__Bdellovibrionia;o__Bdellovibrionales;f__Bdellovibrionaceae;g__Bdellovibrio
OTU_898	1	6	7	2	3	2	15	6	k__Bacteria;p__Proteobacteria;c__Alphaproteobacteria;o__Rhizobiales;f__Hyphomicrobiaceae;g__Hyphomicrobium;s__	1	0	0	9	7	0	8	0	11	6	0	0	0	0	9	0	0	5	14	1	29	7	4	7	k__Bacteria;p__Proteobacteria;c__Alphaproteobacteria;o__Rhizobiales;f__Hyphomicrobiaceae;g__Hyphomicrobium;s__
OTU_899	1	0	1	1	0	1	10	10	k__Bacteria;p__Proteobacteria;c__Alphaproteobacteria;o__Rhizobiales;f__Pleomorphomonadaceae;g__Prosthecomicrobium;s__Prosthecomicrobium_hirschii	1	0	0	0	0	0	0	0	1	3	0	0	0	0	0	0	0	1	3	2	24	1	21	7	k__Bacteria;p__Proteobacteria;c__Alphaproteobacteria;o__Rhizobiales;f__Pleomorphomonadaceae;g__Prosthecomicrobium;s__Prosthecomicrobium_hirschii
OTU_900	0	0	9	0	0	0	23	2	k__Bacteria;p__Acidobacteriota;c__Blastocatellia;o__11-24;f__11-24;g__11-24;s__	0	0	0	0	0	0	3	0	24	0	0	0	0	0	0	0	0	0	7	3	58	1	3	2	k__Bacteria;p__Acidobacteriota;c__Blastocatellia;o__11-24;f__11-24;g__11-24;s__
OTU_901	15	0	2	0	0	1	9	2	k__Bacteria;p__Proteobacteria;c__Gammaproteobacteria;o__Burkholderiales;f__Rhodocyclaceae;g__Zoogloea	43	2	0	0	0	0	6	0	0	0	0	0	0	0	0	0	0	1	21	5	1	3	1	0	k__Bacteria;p__Proteobacteria;c__Gammaproteobacteria;o__Burkholderiales;f__Rhodocyclaceae;g__Zoogloea
OTU_902	0	0	0	0	0	0	0	27	k__Bacteria;p__Proteobacteria;c__Gammaproteobacteria;o__Burkholderiales;f__Nitrosomonadaceae;g__IS-44;s__	0	0	0	0	0	0	0	0	0	0	0	0	0	0	0	0	0	0	0	0	0	77	2	0	k__Bacteria;p__Proteobacteria;c__Gammaproteobacteria;o__Burkholderiales;f__Nitrosomonadaceae;g__IS-44;s__
OTU_903	0	0	14	0	0	0	6	0	k__Bacteria;p__Firmicutes;c__Desulfotomaculia;o__Desulfotomaculales;f__Desulfotomaculales;g__Cryptanaerobacter;s__	0	0	0	0	0	0	40	0	0	0	0	0	0	0	0	0	0	0	16	0	0	0	0	0	k__Bacteria;p__Firmicutes;c__Desulfotomaculia;o__Desulfotomaculales;f__Desulfotomaculales;g__Cryptanaerobacter;s__
OTU_904	1	0	3	1	1	1	11	5	k__Bacteria;p__Proteobacteria;c__Alphaproteobacteria;o__Caulobacterales;f__Hyphomonadaceae;g__SWB02	2	0	0	0	0	0	0	0	8	0	2	0	1	0	0	0	0	1	3	1	27	2	1	10	k__Bacteria;p__Proteobacteria;c__Alphaproteobacteria;o__Caulobacterales;f__Hyphomonadaceae;g__SWB02
OTU_905	1	6	10	7	1	11	4	0	k__Bacteria;p__Firmicutes;c__Clostridia;o__Peptostreptococcales-Tissierellales;f__Anaerovoracaceae;g__Anaerovorax;s__	0	2	0	0	0	18	29	1	0	18	2	0	0	1	0	0	32	0	11	0	0	0	0	0	k__Bacteria;p__Firmicutes;c__Clostridia;o__Peptostreptococcales-Tissierellales;f__Anaerovoracaceae;g__Anaerovorax;s__
OTU_906	17	0	6	2	1	0	0	0	k__Bacteria	10	6	33	0	0	0	1	1	14	1	3	2	1	0	0	0	0	0	0	0	0	0	0	0	k__Bacteria
OTU_907	0	2	8	0	0	2	6	0	k__Bacteria;p__Proteobacteria;c__Gammaproteobacteria;o__Thiomicrospirales;f__Thiomicrospiraceae;g__Thioalkalimicrobium	0	0	0	0	0	6	23	0	0	0	0	0	0	0	0	0	4	0	17	0	0	0	0	0	k__Bacteria;p__Proteobacteria;c__Gammaproteobacteria;o__Thiomicrospirales;f__Thiomicrospiraceae;g__Thioalkalimicrobium
OTU_908	0	0	6	0	0	1	29	7	k__Bacteria;p__Bacteroidota;c__Bacteroidia;o__Cytophagales;f__Microscillaceae;g__;s__	0	0	0	0	0	0	18	0	0	0	0	0	0	0	0	0	0	2	77	2	6	0	6	15	k__Bacteria;p__Bacteroidota;c__Bacteroidia;o__Cytophagales;f__Microscillaceae;g__;s__
OTU_909	7	9	5	2	8	5	32	53	k__Bacteria;p__Proteobacteria;c__Gammaproteobacteria;o__Burkholderiales;f__Comamonadaceae	16	1	2	13	4	8	1	0	12	4	2	0	2	18	2	12	0	1	8	2	85	102	14	42	k__Bacteria;p__Proteobacteria;c__Gammaproteobacteria;o__Burkholderiales;f__Comamonadaceae
OTU_910	3	26	0	0	0	1	1	5	k__Bacteria;p__Cyanobacteria;c__Cyanobacteriia;o__Chloroplast;f__Chloroplast;g__Chloroplast;s__Oscillatoriales_cyanobacterium	5	3	0	1	76	0	0	0	0	0	0	0	0	0	0	3	0	0	1	1	1	0	12	2	k__Bacteria;p__Cyanobacteria;c__Cyanobacteriia;o__Chloroplast;f__Chloroplast;g__Chloroplast;s__Oscillatoriales_cyanobacterium
OTU_911	7	0	0	3	10	0	0	0	k__Bacteria;p__Firmicutes;c__Clostridia;o__Lachnospirales;f__Lachnospiraceae	0	0	19	0	0	0	0	0	0	7	0	0	29	0	0	0	0	0	0	0	0	0	0	0	k__Bacteria;p__Firmicutes;c__Clostridia;o__Lachnospirales;f__Lachnospiraceae
OTU_912	4	0	0	17	0	0	0	0	k__Bacteria	0	6	5	0	0	0	0	0	0	49	2	0	0	0	0	0	0	0	0	0	0	0	0	0	k__Bacteria
OTU_913	1	3	3	0	0	0	26	2	k__Bacteria;p__Bacteroidota;c__Bacteroidia;o__Sphingobacteriales;f__NS11-12_marine_group;g__NS11-12_marine_group	1	2	0	2	4	2	0	9	0	0	0	0	0	0	0	0	0	0	9	60	7	0	1	5	k__Bacteria;p__Bacteroidota;c__Bacteroidia;o__Sphingobacteriales;f__NS11-12_marine_group;g__NS11-12_marine_group
OTU_914	0	0	1	0	0	1	23	1	k__Bacteria;p__Verrucomicrobiota;c__Chlamydiae;o__Chlamydiales	0	0	0	0	0	0	0	3	0	0	0	0	0	0	0	0	0	1	5	62	2	0	1	0	k__Bacteria;p__Verrucomicrobiota;c__Chlamydiae;o__Chlamydiales
OTU_915	6	2	5	5	2	5	1	1	k__Bacteria;p__Proteobacteria;c__Gammaproteobacteria;o__Burkholderiales;f__Burkholderiaceae;g__Burkholderia-Caballeronia-Paraburkholderia;s__Burkholderia_cenocepacia	2	16	0	0	5	0	6	6	2	1	2	12	2	3	1	12	3	0	0	1	2	0	0	3	k__Bacteria;p__Proteobacteria;c__Gammaproteobacteria;o__Burkholderiales;f__Burkholderiaceae;g__Burkholderia-Caballeronia-Paraburkholderia;s__Burkholderia_cenocepacia
OTU_916	0	0	1	1	0	1	26	2	k__Bacteria;p__Planctomycetota;c__Planctomycetes;o__Pirellulales;f__Pirellulaceae;g__Pirellula;s__	0	0	0	0	0	0	1	0	0	1	1	0	0	0	0	0	0	2	63	6	9	0	5	1	k__Bacteria;p__Planctomycetota;c__Planctomycetes;o__Pirellulales;f__Pirellulaceae;g__Pirellula;s__
OTU_917	0	1	0	1	0	0	1	21	k__Bacteria;p__Patescibacteria;c__Gracilibacteria;o__Gracilibacteria;f__Gracilibacteria;g__Gracilibacteria;s__Gracilibacteria_bacterium	0	0	0	0	0	2	0	0	0	0	1	0	0	0	0	0	0	0	0	0	1	0	6	56	k__Bacteria;p__Patescibacteria;c__Gracilibacteria;o__Gracilibacteria;f__Gracilibacteria;g__Gracilibacteria;s__Gracilibacteria_bacterium
OTU_918	1	4	6	0	1	5	2	0	k__Bacteria;p__Synergistota;c__Synergistia;o__Synergistales;f__Synergistaceae;g__;s__	0	3	0	0	0	10	17	0	0	0	0	0	0	1	0	0	15	0	4	0	0	0	0	0	k__Bacteria;p__Synergistota;c__Synergistia;o__Synergistales;f__Synergistaceae;g__;s__
OTU_919	0	1	8	0	1	1	23	3	k__Bacteria;p__Actinobacteriota;c__Thermoleophilia;o__Gaiellales;f__;g__;s__Gaiella_sp.	0	0	0	0	0	2	10	12	2	0	0	0	3	0	0	0	1	1	22	40	7	0	0	8	k__Bacteria;p__Actinobacteriota;c__Thermoleophilia;o__Gaiellales;f__;g__;s__Gaiella_sp.
OTU_920	1	0	2	0	0	0	20	1	k__Bacteria;p__Verrucomicrobiota;c__Verrucomicrobiae;o__Pedosphaerales;f__Pedosphaeraceae;g__RS25G;s__bacterium_RS25G	0	3	0	0	0	0	5	0	0	0	0	0	0	0	0	0	0	0	51	1	6	0	0	3	k__Bacteria;p__Verrucomicrobiota;c__Verrucomicrobiae;o__Pedosphaerales;f__Pedosphaeraceae;g__RS25G;s__bacterium_RS25G
OTU_921	16	10	1	1	13	1	11	28	k__Bacteria;p__Proteobacteria;c__Gammaproteobacteria;o__Burkholderiales;f__Comamonadaceae	28	13	7	9	3	17	0	0	2	1	1	0	0	37	0	0	1	1	5	0	26	15	5	63	k__Bacteria;p__Proteobacteria;c__Gammaproteobacteria;o__Burkholderiales;f__Comamonadaceae
OTU_922	0	0	9	1	0	2	24	6	k__Bacteria;p__Proteobacteria;c__Alphaproteobacteria;o__Azospirillales;f__Azospirillaceae;g__Niveispirillum;s__Azospirillum_sp.	0	0	0	0	0	0	1	3	22	0	1	2	0	0	0	0	0	4	5	5	61	4	6	6	k__Bacteria;p__Proteobacteria;c__Alphaproteobacteria;o__Azospirillales;f__Azospirillaceae;g__Niveispirillum;s__Azospirillum_sp.
OTU_923	0	0	7	0	0	1	30	5	k__Bacteria;p__Proteobacteria;c__Gammaproteobacteria;o__Burkholderiales;f__Burkholderiaceae;g__Limnobacter;s__	0	0	0	0	0	0	0	0	19	0	0	0	0	0	0	0	1	1	0	0	88	6	3	5	k__Bacteria;p__Proteobacteria;c__Gammaproteobacteria;o__Burkholderiales;f__Burkholderiaceae;g__Limnobacter;s__
OTU_924	5	3	2	0	0	0	18	2	k__Bacteria;p__Bacteroidota;c__Bacteroidia;o__Chitinophagales;f__37-13;g__37-13;s__	3	10	0	3	3	1	3	1	0	0	0	0	0	0	0	0	0	0	39	9	5	3	0	3	k__Bacteria;p__Bacteroidota;c__Bacteroidia;o__Chitinophagales;f__37-13;g__37-13;s__
OTU_925	22	8	3	4	2	2	6	20	k__Bacteria;p__Actinobacteriota;c__Actinobacteria;o__Kineosporiales;f__Kineosporiaceae	59	5	0	8	9	7	6	1	2	6	4	0	0	2	3	2	0	3	8	4	5	3	23	34	k__Bacteria;p__Actinobacteriota;c__Actinobacteria;o__Kineosporiales;f__Kineosporiaceae
OTU_926	0	1	8	1	1	0	29	10	k__Bacteria	0	0	0	0	0	1	1	0	22	0	1	0	0	1	0	0	0	0	10	3	74	12	6	10	k__Bacteria
OTU_927	1	0	2	0	0	0	22	1	k__Bacteria;p__Planctomycetota;c__Planctomycetes;o__Planctomycetales;f__Schlesneriaceae;g__Schlesneria;s__	0	2	0	0	0	0	5	1	0	0	0	0	0	0	0	0	0	0	56	2	6	0	2	1	k__Bacteria;p__Planctomycetota;c__Planctomycetes;o__Planctomycetales;f__Schlesneriaceae;g__Schlesneria;s__
OTU_928	0	0	0	0	0	0	0	21	k__Bacteria	0	0	0	0	0	0	0	0	0	0	0	0	0	0	0	0	0	0	0	0	0	62	0	0	k__Bacteria
OTU_929	3	3	5	2	3	3	4	6	k__Bacteria;p__Actinobacteriota;c__Actinobacteria;o__Micrococcales;f__Intrasporangiaceae	6	2	1	4	0	3	5	4	6	3	2	1	2	4	1	0	2	7	5	1	6	1	2	13	k__Bacteria;p__Actinobacteriota;c__Actinobacteria;o__Micrococcales;f__Intrasporangiaceae
OTU_930	5	0	3	12	10	1	0	3	k__Bacteria;p__Firmicutes;c__Clostridia;o__Lachnospirales;f__Lachnospiraceae;g__Eubacterium_ventriosum_group;s__	0	0	13	0	0	0	3	4	1	32	3	1	25	1	2	0	2	0	0	0	0	0	8	0	k__Bacteria;p__Firmicutes;c__Clostridia;o__Lachnospirales;f__Lachnospiraceae;g__Eubacterium_ventriosum_group;s__
OTU_931	0	0	3	1	0	0	26	4	k__Bacteria;p__Acidobacteriota;c__Acidobacteriae;o__Acidobacteriae;f__Acidobacteriae;g__Paludibaculum;s__	0	0	0	0	0	0	0	0	8	0	1	0	0	0	0	0	0	0	2	3	72	0	1	9	k__Bacteria;p__Acidobacteriota;c__Acidobacteriae;o__Acidobacteriae;f__Acidobacteriae;g__Paludibaculum;s__
OTU_932	0	0	0	22	0	0	0	0	k__Bacteria;p__Proteobacteria;c__Alphaproteobacteria;o__Rickettsiales;f__Anaplasmataceae;g__Anaplasma;s__Anaplasma_marginale	0	0	0	0	0	0	0	0	0	65	0	0	0	0	0	0	0	0	0	0	0	0	0	0	k__Bacteria;p__Proteobacteria;c__Alphaproteobacteria;o__Rickettsiales;f__Anaplasmataceae;g__Anaplasma;s__Anaplasma_marginale
OTU_933	0	0	5	0	0	0	17	1	k__Bacteria;p__Desulfobacterota;c__Desulfuromonadia;o__PB19;f__PB19;g__PB19;s__	0	0	0	0	0	0	0	0	15	0	0	0	0	0	0	0	0	0	2	3	45	0	0	1	k__Bacteria;p__Desulfobacterota;c__Desulfuromonadia;o__PB19;f__PB19;g__PB19;s__
OTU_934	2	12	0	3	0	2	1	42	k__Bacteria;p__Proteobacteria;c__Gammaproteobacteria;o__Burkholderiales;f__Rhodocyclaceae	4	1	1	0	23	13	0	0	0	8	1	0	0	0	0	4	0	0	0	2	0	34	64	28	k__Bacteria;p__Proteobacteria;c__Gammaproteobacteria;o__Burkholderiales;f__Rhodocyclaceae
OTU_935	1	10	0	2	0	22	0	0	k__Bacteria;p__Firmicutes;c__Clostridia;o__Lachnospirales;f__Lachnospiraceae	0	3	0	0	0	29	0	0	0	0	0	5	0	0	0	0	65	0	0	0	0	0	0	0	k__Bacteria;p__Firmicutes;c__Clostridia;o__Lachnospirales;f__Lachnospiraceae
OTU_936	66	138	72	59	38	124	68	700	k__Bacteria;p__Proteobacteria;c__Alphaproteobacteria;o__Rhodobacterales;f__Rhodobacteraceae	117	24	57	61	255	96	88	71	55	109	55	12	27	38	49	139	58	175	46	40	116	122	1024	954	k__Bacteria;p__Proteobacteria;c__Alphaproteobacteria;o__Rhodobacterales;f__Rhodobacteraceae
OTU_937	0	0	0	22	0	0	0	0	k__Bacteria;p__Bacteroidota;c__Bacteroidia;o__Bacteroidales;f__Prevotellaceae;g__Prevotellaceae_UCG-001;s__	0	0	0	0	0	0	0	0	0	66	0	0	0	0	0	0	0	0	0	0	0	0	0	0	k__Bacteria;p__Bacteroidota;c__Bacteroidia;o__Bacteroidales;f__Prevotellaceae;g__Prevotellaceae_UCG-001;s__
OTU_938	9	1	3	3	8	4	0	1	k__Bacteria;p__Firmicutes;c__Clostridia;o__Oscillospirales;f__Eubacterium_coprostanoligenes_group;g__Eubacterium_coprostanoligenes_group;s__	2	8	15	0	0	2	4	3	0	8	0	0	22	0	0	5	6	0	0	0	0	0	1	0	k__Bacteria;p__Firmicutes;c__Clostridia;o__Oscillospirales;f__Eubacterium_coprostanoligenes_group;g__Eubacterium_coprostanoligenes_group;s__
OTU_939	0	0	2	0	0	1	43	3	k__Bacteria;p__Planctomycetota;c__Planctomycetes;o__Planctomycetales;f__Schlesneriaceae;g__Planctopirus;s__	0	0	0	0	0	0	0	4	1	0	0	0	0	0	0	0	0	1	20	68	39	2	0	5	k__Bacteria;p__Planctomycetota;c__Planctomycetes;o__Planctomycetales;f__Schlesneriaceae;g__Planctopirus;s__
OTU_940	0	0	13	0	0	0	7	0	k__Bacteria;p__Desulfobacterota;c__Desulfuromonadia	0	0	0	0	0	0	38	0	0	0	0	0	0	0	0	0	0	0	20	0	0	0	0	0	k__Bacteria;p__Desulfobacterota;c__Desulfuromonadia
OTU_941	14	1	9	42	28	5	0	5	k__Bacteria;p__Firmicutes;c__Negativicutes;o__Veillonellales-Selenomonadales;f__Selenomonadaceae;g__Megamonas;s__	2	0	38	0	1	0	12	15	0	103	16	5	78	0	4	2	4	9	0	0	0	0	15	0	k__Bacteria;p__Firmicutes;c__Negativicutes;o__Veillonellales-Selenomonadales;f__Selenomonadaceae;g__Megamonas;s__
OTU_942	0	16	0	0	3	7	0	0	Unknown	0	0	0	23	23	0	0	0	0	0	0	0	2	3	3	13	8	0	0	0	0	0	0	0	Unknown
OTU_943	1	0	1	19	3	1	1	1	k__Bacteria;p__Firmicutes;c__Clostridia;o__Lachnospirales;f__Lachnospiraceae;g__Lachnoclostridium;s__Clostridium_scindens	0	0	1	0	0	0	0	1	1	56	0	0	8	0	0	0	1	0	0	0	1	0	1	0	k__Bacteria;p__Firmicutes;c__Clostridia;o__Lachnospirales;f__Lachnospiraceae;g__Lachnoclostridium;s__Clostridium_scindens
OTU_944	0	0	0	1	0	0	2	22	k__Bacteria;p__Planctomycetota;c__vadinHA49;o__vadinHA49;f__vadinHA49;g__vadinHA49;s__	0	0	0	0	0	0	0	0	0	3	0	0	0	0	0	0	0	0	1	3	1	0	46	18	k__Bacteria;p__Planctomycetota;c__vadinHA49;o__vadinHA49;f__vadinHA49;g__vadinHA49;s__
OTU_945	0	0	8	2	2	3	0	0	k__Bacteria;p__Proteobacteria;c__Gammaproteobacteria;o__Legionellales;f__Legionellaceae;g__Legionella;s__Legionella_lytica	0	0	0	0	0	0	9	6	7	2	3	1	0	3	2	0	0	7	0	0	0	0	0	0	k__Bacteria;p__Proteobacteria;c__Gammaproteobacteria;o__Legionellales;f__Legionellaceae;g__Legionella;s__Legionella_lytica
OTU_946	10	4	3	1	0	0	10	1	k__Bacteria;p__Cyanobacteria;c__Cyanobacteriia;o__Leptolyngbyales;f__Leptolyngbyaceae;g__JSC-12	6	20	2	1	5	5	3	3	2	0	0	3	0	0	0	0	0	0	17	10	2	0	0	1	k__Bacteria;p__Cyanobacteria;c__Cyanobacteriia;o__Leptolyngbyales;f__Leptolyngbyaceae;g__JSC-12
OTU_947	1	0	0	1	0	1	1	22	k__Bacteria;p__Patescibacteria;c__Saccharimonadia;o__Saccharimonadales;f__LWQ8;g__LWQ8;s__	1	0	0	0	0	0	0	0	0	2	0	0	0	0	0	0	0	2	3	0	0	0	45	19	k__Bacteria;p__Patescibacteria;c__Saccharimonadia;o__Saccharimonadales;f__LWQ8;g__LWQ8;s__
OTU_948	0	0	0	18	0	0	0	0	k__Bacteria;p__Firmicutes;c__Clostridia;o__Clostridiales;f__Clostridiaceae;g__Clostridium_sensu_stricto_7;s__Clostridium_sp.	0	0	0	0	0	0	0	0	0	53	0	0	0	0	0	0	0	0	0	0	0	0	0	0	k__Bacteria;p__Firmicutes;c__Clostridia;o__Clostridiales;f__Clostridiaceae;g__Clostridium_sensu_stricto_7;s__Clostridium_sp.
OTU_949	2	6	0	3	0	2	3	10	k__Bacteria;p__Proteobacteria;c__Alphaproteobacteria;o__Caedibacterales;f__Caedibacteraceae;g__Caedibacter;s__	2	1	1	1	15	1	0	0	0	5	3	0	0	0	0	4	0	0	4	1	2	0	18	10	k__Bacteria;p__Proteobacteria;c__Alphaproteobacteria;o__Caedibacterales;f__Caedibacteraceae;g__Caedibacter;s__
OTU_950	1	0	4	0	0	1	36	5	k__Bacteria;p__Verrucomicrobiota;c__Verrucomicrobiae;o__Pedosphaerales;f__Pedosphaeraceae;g__Oikopleura;s__	2	0	0	0	0	0	0	0	10	0	0	0	0	0	0	0	0	1	3	2	103	4	3	6	k__Bacteria;p__Verrucomicrobiota;c__Verrucomicrobiae;o__Pedosphaerales;f__Pedosphaeraceae;g__Oikopleura;s__
OTU_951	1	0	0	3	0	0	1	39	k__Bacteria;p__Spirochaetota;c__Spirochaetia;o__Spirochaetales;f__Spirochaetaceae	2	0	0	0	0	0	0	0	0	6	1	0	0	0	0	0	0	0	0	1	1	0	91	24	k__Bacteria;p__Spirochaetota;c__Spirochaetia;o__Spirochaetales;f__Spirochaetaceae
OTU_952	3	0	9	75	7	4	0	8	k__Bacteria;p__Firmicutes;c__Clostridia;o__Oscillospirales;f__Butyricicoccaceae;g__Butyricicoccus;s__	0	0	8	0	0	0	14	9	3	221	4	0	10	5	4	6	5	0	0	0	0	0	24	0	k__Bacteria;p__Firmicutes;c__Clostridia;o__Oscillospirales;f__Butyricicoccaceae;g__Butyricicoccus;s__
OTU_953	0	0	3	0	0	1	16	3	k__Bacteria;p__Myxococcota;c__Polyangia;o__Nannocystales;f__Nannocystaceae;g__Nannocystis;s__	0	0	0	0	0	0	0	0	9	0	0	0	0	0	0	0	0	1	3	3	40	0	2	5	k__Bacteria;p__Myxococcota;c__Polyangia;o__Nannocystales;f__Nannocystaceae;g__Nannocystis;s__
OTU_954	0	0	4	0	0	1	15	2	k__Bacteria;p__Proteobacteria;c__Gammaproteobacteria;o__Burkholderiales	0	0	0	0	0	0	0	0	10	0	0	0	0	0	0	0	0	1	1	0	43	0	1	4	k__Bacteria;p__Proteobacteria;c__Gammaproteobacteria;o__Burkholderiales
OTU_955	1	2	5	0	0	5	3	0	k__Bacteria;p__Firmicutes;c__Clostridia;o__Peptostreptococcales-Tissierellales;f__Sedimentibacteraceae;g__Sedimentibacter;s__	0	1	0	0	0	4	13	0	0	0	0	0	0	0	0	0	14	0	9	0	0	0	0	0	k__Bacteria;p__Firmicutes;c__Clostridia;o__Peptostreptococcales-Tissierellales;f__Sedimentibacteraceae;g__Sedimentibacter;s__
OTU_956	0	0	0	20	0	0	0	0	k__Bacteria;p__Firmicutes;c__Clostridia;o__Oscillospirales;f__Ruminococcaceae	0	0	0	0	0	0	0	0	0	59	0	0	0	0	0	0	0	0	0	0	0	0	0	0	k__Bacteria;p__Firmicutes;c__Clostridia;o__Oscillospirales;f__Ruminococcaceae
OTU_957	0	0	1	0	0	1	15	2	k__Bacteria;p__Bacteroidota;c__Bacteroidia;o__Chitinophagales;f__Saprospiraceae;g__;s__	0	0	0	0	0	0	0	3	0	0	0	0	0	0	0	0	0	2	2	37	4	0	1	5	k__Bacteria;p__Bacteroidota;c__Bacteroidia;o__Chitinophagales;f__Saprospiraceae;g__;s__
OTU_958	2	2	4	2	1	6	3	11	k__Bacteria;p__Actinobacteriota;c__Acidimicrobiia;o__Microtrichales;f__Iamiaceae;g__Iamia;s__	1	2	1	0	4	2	5	2	4	1	2	1	0	0	2	1	1	15	1	0	6	1	17	13	k__Bacteria;p__Actinobacteriota;c__Acidimicrobiia;o__Microtrichales;f__Iamiaceae;g__Iamia;s__
OTU_959	1	1	3	1	0	1	42	18	k__Bacteria;p__Proteobacteria;c__Gammaproteobacteria;o__R7C24;f__R7C24;g__R7C24;s__	2	0	0	0	1	0	0	0	7	0	2	0	0	0	0	0	0	2	5	6	113	35	2	16	k__Bacteria;p__Proteobacteria;c__Gammaproteobacteria;o__R7C24;f__R7C24;g__R7C24;s__
OTU_960	0	8	0	1	0	11	0	0	k__Bacteria;p__Firmicutes;c__Clostridia;o__Oscillospirales;f__Eubacterium_coprostanoligenes_group;g__Eubacterium_coprostanoligenes_group;s__Clostridiales_bacterium	0	0	0	0	0	24	0	0	0	0	0	2	0	0	0	0	32	0	0	0	0	0	0	0	k__Bacteria;p__Firmicutes;c__Clostridia;o__Oscillospirales;f__Eubacterium_coprostanoligenes_group;g__Eubacterium_coprostanoligenes_group;s__Clostridiales_bacterium
OTU_961	9	1	2	1	9	1	2	1	k__Bacteria;p__Actinobacteriota;c__Actinobacteria;o__Micrococcales;f__Brevibacteriaceae;g__Brevibacterium	2	0	25	0	0	1	3	0	2	0	1	1	27	0	0	0	2	0	1	0	4	3	0	0	k__Bacteria;p__Actinobacteriota;c__Actinobacteria;o__Micrococcales;f__Brevibacteriaceae;g__Brevibacterium
OTU_962	10	1	1	0	3	0	5	1	k__Bacteria;p__Actinobacteriota;c__Acidimicrobiia;o__Microtrichales;f__Ilumatobacteraceae;g__;s__	5	2	21	0	1	0	0	1	2	0	0	0	7	0	0	0	0	0	0	0	13	0	1	0	k__Bacteria;p__Actinobacteriota;c__Acidimicrobiia;o__Microtrichales;f__Ilumatobacteraceae;g__;s__
OTU_963	0	14	0	0	4	1	0	0	Unknown	0	0	0	42	0	0	0	0	0	0	0	0	6	0	4	3	0	0	0	0	0	0	0	0	Unknown
OTU_964	10	1	6	5	0	2	13	7	k__Bacteria;p__Proteobacteria;c__Gammaproteobacteria;o__Burkholderiales;f__Alcaligenaceae;g__Achromobacter	23	5	2	1	1	1	7	0	11	13	1	0	0	0	0	0	0	5	3	3	31	5	7	9	k__Bacteria;p__Proteobacteria;c__Gammaproteobacteria;o__Burkholderiales;f__Alcaligenaceae;g__Achromobacter
OTU_965	0	0	9	0	0	0	7	0	k__Bacteria;p__Desulfobacterota;c__Desulfovibrionia;o__Desulfovibrionales;f__Desulfomicrobiaceae;g__Desulfomicrobium;s__	0	0	0	0	0	0	25	0	0	0	0	0	0	0	0	0	0	0	20	0	0	0	0	0	k__Bacteria;p__Desulfobacterota;c__Desulfovibrionia;o__Desulfovibrionales;f__Desulfomicrobiaceae;g__Desulfomicrobium;s__
OTU_966	1	3	3	2	0	0	14	8	k__Bacteria;p__Bacteroidota;c__Bacteroidia;o__Cytophagales	1	0	0	0	9	0	7	0	2	0	6	0	0	0	0	0	0	0	38	2	1	0	4	20	k__Bacteria;p__Bacteroidota;c__Bacteroidia;o__Cytophagales
OTU_967	1	0	8	51	2	4	1	8	k__Bacteria;p__Firmicutes;c__Negativicutes;o__Veillonellales-Selenomonadales;f__Veillonellaceae;g__Veillonella;s__Veillonella_atypica	2	0	0	0	0	0	9	10	5	148	3	0	1	2	1	1	5	4	0	0	2	5	13	4	k__Bacteria;p__Firmicutes;c__Negativicutes;o__Veillonellales-Selenomonadales;f__Veillonellaceae;g__Veillonella;s__Veillonella_atypica
OTU_968	1	3	0	0	1	0	2	1	k__Bacteria;p__Bdellovibrionota;c__Bdellovibrionia;o__Bdellovibrionales;f__Bdellovibrionaceae;g__Bdellovibrio;s__Bdellovibrio_exovorus	2	0	1	7	2	0	0	0	0	0	0	0	0	0	2	0	0	0	0	0	5	1	0	0	k__Bacteria;p__Bdellovibrionota;c__Bdellovibrionia;o__Bdellovibrionales;f__Bdellovibrionaceae;g__Bdellovibrio;s__Bdellovibrio_exovorus
OTU_969	2	0	0	1	0	1	2	13	k__Bacteria;p__Bdellovibrionota;c__Bdellovibrionia;o__Bdellovibrionales;f__Bdellovibrionaceae;g__Bdellovibrio;s__Bdellovibrio_bacteriovorus	4	0	0	0	0	0	0	0	0	1	0	0	0	0	0	0	0	3	2	1	2	0	2	37	k__Bacteria;p__Bdellovibrionota;c__Bdellovibrionia;o__Bdellovibrionales;f__Bdellovibrionaceae;g__Bdellovibrio;s__Bdellovibrio_bacteriovorus
OTU_970	0	0	2	0	0	1	21	1	k__Bacteria;p__Gemmatimonadota;c__Gemmatimonadetes;o__Gemmatimonadales;f__Gemmatimonadaceae	0	0	0	0	0	0	0	0	5	0	0	0	0	0	0	0	0	2	2	2	58	0	0	2	k__Bacteria;p__Gemmatimonadota;c__Gemmatimonadetes;o__Gemmatimonadales;f__Gemmatimonadaceae
OTU_971	0	0	7	9	0	0	0	0	k__Bacteria	0	0	0	0	0	0	9	12	0	24	0	3	0	0	0	0	0	0	0	0	0	0	0	0	k__Bacteria
OTU_972	5	23	0	0	0	3	0	0	k__Bacteria;p__Cyanobacteria;c__Cyanobacteriia;o__Chloroplast;f__Chloroplast;g__Chloroplast;s__Trachydiscus_minutus	4	8	1	0	67	1	0	0	0	0	0	0	0	0	0	7	0	0	0	0	0	0	0	0	k__Bacteria;p__Cyanobacteria;c__Cyanobacteriia;o__Chloroplast;f__Chloroplast;g__Chloroplast;s__Trachydiscus_minutus
OTU_973	0	0	0	0	0	0	2	17	k__Bacteria;p__Verrucomicrobiota;c__Verrucomicrobiae;o__Chthoniobacterales;f__Chthoniobacteraceae;g__Chthoniobacter;s__	0	0	0	0	0	0	0	0	0	0	0	0	0	0	0	0	0	0	0	0	4	49	0	1	k__Bacteria;p__Verrucomicrobiota;c__Verrucomicrobiae;o__Chthoniobacterales;f__Chthoniobacteraceae;g__Chthoniobacter;s__
OTU_974	26	0	0	0	1	0	0	0	k__Bacteria	0	51	26	0	0	0	0	0	0	0	0	0	3	0	0	0	0	0	0	0	0	0	0	0	k__Bacteria
OTU_975	3	9	0	1	0	1	3	12	k__Bacteria;p__Cyanobacteria;c__Cyanobacteriia;o__Thermosynechococcales;f__Thermosynechococcaceae;g__Cyanothece_PCC_7425;s__Aphanocapsa_muscicola	5	1	2	0	24	1	0	0	0	2	0	0	0	0	0	3	0	0	2	1	5	0	25	11	k__Bacteria;p__Cyanobacteria;c__Cyanobacteriia;o__Thermosynechococcales;f__Thermosynechococcaceae;g__Cyanothece_PCC_7425;s__Aphanocapsa_muscicola
OTU_976	3	0	1	1	0	1	2	18	k__Bacteria;p__Acidobacteriota;c__Vicinamibacteria;o__Vicinamibacterales;f__Vicinamibacteraceae;g__Luteitalea	8	0	0	0	0	0	2	1	0	1	2	0	0	0	0	0	2	1	4	0	0	9	12	32	k__Bacteria;p__Acidobacteriota;c__Vicinamibacteria;o__Vicinamibacterales;f__Vicinamibacteraceae;g__Luteitalea
OTU_977	5	0	3	1	0	2	8	19	k__Bacteria;p__Proteobacteria;c__Alphaproteobacteria;o__Sphingomonadales;f__Sphingomonadaceae;g__Sphingobium	6	4	3	0	0	0	1	1	5	1	1	0	0	0	0	0	1	3	1	4	17	42	2	12	k__Bacteria;p__Proteobacteria;c__Alphaproteobacteria;o__Sphingomonadales;f__Sphingomonadaceae;g__Sphingobium
OTU_978	0	0	4	6	0	0	0	0	k__Bacteria	0	0	0	0	0	0	2	10	0	5	0	12	0	0	0	0	0	0	0	0	0	0	0	0	k__Bacteria
OTU_979	0	0	9	0	0	0	3	0	k__Bacteria;p__Deinococcota;c__Deinococci;o__Deinococcales;f__Trueperaceae;g__Truepera;s__	0	0	0	0	0	0	27	0	0	0	0	0	0	0	0	0	0	0	7	0	0	0	0	0	k__Bacteria;p__Deinococcota;c__Deinococci;o__Deinococcales;f__Trueperaceae;g__Truepera;s__
OTU_980	1	1	0	0	0	1	0	20	k__Bacteria;p__Chloroflexi;c__Chloroflexia;o__Chloroflexales;f__Roseiflexaceae	1	0	0	0	0	3	0	0	0	0	0	0	0	0	0	0	1	0	0	0	0	0	6	54	k__Bacteria;p__Chloroflexi;c__Chloroflexia;o__Chloroflexales;f__Roseiflexaceae
OTU_981	0	18	0	0	1	0	0	0	Unknown	0	0	0	52	0	0	0	0	0	0	0	0	0	0	2	0	0	0	0	0	0	0	0	0	Unknown
OTU_982	26	3	0	1	0	0	1	3	k__Bacteria;p__Proteobacteria;c__Gammaproteobacteria;o__Burkholderiales;f__Leeiaceae;g__Leeia;s__Leeia_oryzae	51	17	8	2	2	4	0	0	0	0	1	1	0	0	0	0	0	0	1	0	0	0	0	7	k__Bacteria;p__Proteobacteria;c__Gammaproteobacteria;o__Burkholderiales;f__Leeiaceae;g__Leeia;s__Leeia_oryzae
OTU_983	0	0	4	0	0	1	12	3	k__Bacteria;p__Acidobacteriota;c__Blastocatellia;o__11-24;f__11-24;g__11-24;s__	0	0	0	0	0	0	0	0	12	0	0	0	0	0	0	0	0	2	2	2	31	1	1	5	k__Bacteria;p__Acidobacteriota;c__Blastocatellia;o__11-24;f__11-24;g__11-24;s__
OTU_984	1	4	1	0	1	0	3	15	k__Bacteria;p__Verrucomicrobiota;c__Verrucomicrobiae;o__Chthoniobacterales;f__Chthoniobacteraceae;g__Chthoniobacter;s__	1	0	0	10	0	0	1	0	0	0	0	0	0	0	1	0	0	0	7	1	1	38	1	4	k__Bacteria;p__Verrucomicrobiota;c__Verrucomicrobiae;o__Chthoniobacterales;f__Chthoniobacteraceae;g__Chthoniobacter;s__
OTU_985	2	0	0	0	0	1	3	19	k__Bacteria;p__Proteobacteria;c__Gammaproteobacteria;o__Legionellales;f__Legionellaceae;g__Legionella;s__Legionella_sp.	4	0	0	0	0	0	0	0	0	0	0	0	0	0	0	0	0	1	5	0	3	56	0	0	k__Bacteria;p__Proteobacteria;c__Gammaproteobacteria;o__Legionellales;f__Legionellaceae;g__Legionella;s__Legionella_sp.
OTU_986	0	0	2	0	0	1	11	2	k__Bacteria;p__Patescibacteria;c__Saccharimonadia;o__Saccharimonadales;f__Saccharimonadales;g__Saccharimonadales;s__	0	0	0	0	0	0	0	0	4	0	0	0	0	0	0	0	0	1	1	1	31	0	2	2	k__Bacteria;p__Patescibacteria;c__Saccharimonadia;o__Saccharimonadales;f__Saccharimonadales;g__Saccharimonadales;s__
OTU_987	0	0	10	0	0	0	7	0	k__Bacteria	0	0	0	0	0	0	30	0	0	0	0	0	0	0	0	0	0	0	19	0	0	0	0	0	k__Bacteria
OTU_988	0	2	2	0	0	0	5	24	k__Bacteria;p__NB1-j;c__NB1-j;o__NB1-j;f__NB1-j;g__NB1-j;s__	0	0	0	0	4	1	0	0	6	0	0	0	0	0	0	0	0	0	3	0	11	65	1	5	k__Bacteria;p__NB1-j;c__NB1-j;o__NB1-j;f__NB1-j;g__NB1-j;s__
OTU_989	6	0	0	0	8	0	0	0	k__Bacteria;p__Firmicutes;c__Clostridia;o__Monoglobales;f__Monoglobaceae;g__Monoglobus;s__	0	0	18	0	0	0	0	0	0	0	0	0	22	0	0	0	0	0	0	0	0	0	0	0	k__Bacteria;p__Firmicutes;c__Clostridia;o__Monoglobales;f__Monoglobaceae;g__Monoglobus;s__
OTU_991	0	0	0	0	0	11	0	0	k__Bacteria	0	0	0	0	0	0	0	0	0	0	0	0	0	0	0	1	32	0	0	0	0	0	0	0	k__Bacteria
OTU_992	0	0	3	0	0	0	16	1	k__Bacteria;p__Bacteroidota;c__Bacteroidia;o__Sphingobacteriales	0	0	0	0	0	0	7	0	0	0	0	0	0	0	0	0	0	0	46	0	0	0	0	1	k__Bacteria;p__Bacteroidota;c__Bacteroidia;o__Sphingobacteriales
OTU_993	15	13	1	1	2	3	0	0	k__Bacteria;p__Firmicutes;c__Bacilli;o__Bacillales;f__Planococcaceae;g__Psychrobacillus	7	4	32	0	3	36	0	0	2	1	0	0	4	0	0	0	8	0	0	0	0	0	0	0	k__Bacteria;p__Firmicutes;c__Bacilli;o__Bacillales;f__Planococcaceae;g__Psychrobacillus
OTU_994	2	1	1	3	2	14	0	2	Unknown	5	1	0	0	3	0	0	1	2	0	7	0	2	0	4	12	8	22	0	0	0	0	0	4	Unknown
OTU_995	4	0	1	0	9	0	0	2	k__Bacteria;p__Firmicutes;c__Clostridia;o__Lachnospirales;f__Lachnospiraceae;g__Lachnoanaerobaculum;s__	0	2	8	0	0	0	0	0	2	0	0	0	25	0	0	0	0	0	0	0	0	6	0	0	k__Bacteria;p__Firmicutes;c__Clostridia;o__Lachnospirales;f__Lachnospiraceae;g__Lachnoanaerobaculum;s__
OTU_996	5	5	0	1	0	5	1	8	k__Bacteria;p__Proteobacteria;c__Gammaproteobacteria;o__Burkholderiales;f__Chitinibacteraceae;g__Chitinibacter;s__Chitinibacter_tainanensis	5	9	1	1	10	2	0	0	0	0	3	0	0	0	0	13	0	0	0	0	1	0	4	20	k__Bacteria;p__Proteobacteria;c__Gammaproteobacteria;o__Burkholderiales;f__Chitinibacteraceae;g__Chitinibacter;s__Chitinibacter_tainanensis
OTU_997	7	29	0	3	5	3	3	47	k__Bacteria;p__Proteobacteria;c__Gammaproteobacteria;o__Burkholderiales;f__Rhodocyclaceae;g__Azonexus;s__	12	1	7	45	37	5	0	0	0	7	0	0	0	0	13	6	0	2	6	1	2	0	96	44	k__Bacteria;p__Proteobacteria;c__Gammaproteobacteria;o__Burkholderiales;f__Rhodocyclaceae;g__Azonexus;s__
OTU_998	2	0	6	1	2	2	11	6	k__Bacteria;p__Proteobacteria;c__Gammaproteobacteria;o__Oceanospirillales;f__Alcanivoracaceae;g__Ketobacter;s__	1	0	5	0	0	0	2	0	16	0	2	0	6	0	0	0	0	4	2	3	28	11	1	5	k__Bacteria;p__Proteobacteria;c__Gammaproteobacteria;o__Oceanospirillales;f__Alcanivoracaceae;g__Ketobacter;s__
OTU_999	1	5	2	2	0	1	2	15	k__Bacteria;p__Gemmatimonadota;c__Gemmatimonadetes;o__Gemmatimonadales;f__Gemmatimonadaceae;g__Gemmatimonas;s__	2	0	1	0	13	1	2	3	0	3	2	0	0	0	0	1	1	1	1	3	2	0	36	7	k__Bacteria;p__Gemmatimonadota;c__Gemmatimonadetes;o__Gemmatimonadales;f__Gemmatimonadaceae;g__Gemmatimonas;s__
OTU_1000	1	0	3	0	1	0	5	10	k__Bacteria;p__Actinobacteriota;c__Actinobacteria;o__Frankiales;f__Frankiaceae;g__Jatrophihabitans;s__	0	2	0	0	0	0	0	6	1	0	0	0	0	1	0	0	0	0	3	12	0	29	1	0	k__Bacteria;p__Actinobacteriota;c__Actinobacteria;o__Frankiales;f__Frankiaceae;g__Jatrophihabitans;s__
OTU_1001	15	0	5	3	0	0	0	0	Unknown	7	13	24	0	0	0	2	6	7	0	2	6	0	0	0	0	0	0	0	0	0	0	0	0	Unknown
OTU_1002	1	1	2	2	1	2	0	4	k__Bacteria;p__Firmicutes;c__Bacilli;o__Lactobacillales;f__Streptococcaceae;g__Lactococcus;s__Lactococcus_lactis	0	2	0	0	0	1	1	4	0	5	0	0	3	0	0	3	0	2	0	0	0	10	0	0	k__Bacteria;p__Firmicutes;c__Bacilli;o__Lactobacillales;f__Streptococcaceae;g__Lactococcus;s__Lactococcus_lactis
OTU_1003	0	0	7	0	0	0	15	2	k__Bacteria;p__Actinobacteriota;c__Actinobacteria;o__PeM15;f__PeM15;g__PeM15;s__	0	0	0	0	0	0	0	0	19	0	0	0	0	0	0	0	0	0	3	2	40	1	1	2	k__Bacteria;p__Actinobacteriota;c__Actinobacteria;o__PeM15;f__PeM15;g__PeM15;s__
OTU_1004	0	1	10	0	0	0	5	0	k__Bacteria;p__Firmicutes;c__Clostridia;o__Peptostreptococcales-Tissierellales;f__Peptostreptococcales-Tissierellales;g__Alkaliphilus;s__	0	0	0	0	0	1	29	0	0	0	0	0	0	0	0	0	0	0	14	0	0	0	0	0	k__Bacteria;p__Firmicutes;c__Clostridia;o__Peptostreptococcales-Tissierellales;f__Peptostreptococcales-Tissierellales;g__Alkaliphilus;s__
OTU_1006	1	0	0	3	1	0	1	14	k__Bacteria;p__Firmicutes;c__Clostridia;o__Clostridia;f__Hungateiclostridiaceae;g__Anaerobacterium;s__	0	0	1	0	0	0	0	0	0	5	2	0	2	0	0	0	0	0	1	0	2	0	27	13	k__Bacteria;p__Firmicutes;c__Clostridia;o__Clostridia;f__Hungateiclostridiaceae;g__Anaerobacterium;s__
OTU_1007	3	17	0	0	1	0	1	1	k__Bacteria;p__Bacteroidota;c__Bacteroidia;o__Cytophagales;f__Raineyaceae;g__Raineya;s__bacterium_336/3	0	7	1	33	10	8	0	0	0	0	0	0	0	0	1	0	0	0	1	1	0	0	0	1	k__Bacteria;p__Bacteroidota;c__Bacteroidia;o__Cytophagales;f__Raineyaceae;g__Raineya;s__bacterium_336/3
OTU_1008	1	0	2	16	0	0	0	0	k__Bacteria	0	0	3	0	0	0	4	2	0	18	12	18	0	0	0	0	0	0	0	0	0	0	0	0	k__Bacteria
OTU_1009	0	1	0	0	0	0	1	25	k__Bacteria;p__Acidobacteriota;c__Vicinamibacteria;o__Vicinamibacterales;f__Vicinamibacteraceae;g__;s__	0	0	0	1	0	1	0	0	0	0	0	0	0	0	0	0	0	0	0	0	3	72	0	1	k__Bacteria;p__Acidobacteriota;c__Vicinamibacteria;o__Vicinamibacterales;f__Vicinamibacteraceae;g__;s__
OTU_1010	0	0	11	1	0	0	0	0	k__Bacteria	0	0	0	0	0	0	0	33	0	0	2	0	0	0	0	0	0	0	0	0	0	0	0	0	k__Bacteria
OTU_1011	0	0	0	0	0	0	0	20	k__Bacteria;p__Proteobacteria;c__Alphaproteobacteria;o__Reyranellales;f__Reyranellaceae;g__;s__	0	0	0	0	0	0	0	0	0	0	0	0	0	0	0	0	0	0	0	0	0	55	3	1	k__Bacteria;p__Proteobacteria;c__Alphaproteobacteria;o__Reyranellales;f__Reyranellaceae;g__;s__
OTU_1012	0	0	7	0	0	1	7	2	k__Bacteria;p__Proteobacteria;c__Alphaproteobacteria;o__Holosporales;f__Holosporaceae;g__Candidatus_Bealeia;s__	0	0	0	0	0	0	16	5	0	0	0	0	0	0	0	0	0	1	11	5	4	1	3	1	k__Bacteria;p__Proteobacteria;c__Alphaproteobacteria;o__Holosporales;f__Holosporaceae;g__Candidatus_Bealeia;s__
OTU_1013	1	0	1	0	1	0	7	9	k__Bacteria;p__Planctomycetota;c__Planctomycetes;o__Pirellulales;f__Pirellulaceae;g__Pir4_lineage;s__	1	0	0	0	0	0	0	0	1	0	0	0	0	2	0	0	0	0	3	0	16	3	3	19	k__Bacteria;p__Planctomycetota;c__Planctomycetes;o__Pirellulales;f__Pirellulaceae;g__Pir4_lineage;s__
OTU_1014	3	0	2	2	1	1	7	6	k__Bacteria;p__Proteobacteria;c__Gammaproteobacteria;o__Xanthomonadales;f__Xanthomonadaceae;g__Luteimonas;s__Lysobacter_sp.	2	3	2	0	0	0	0	0	4	0	4	0	2	0	0	0	0	1	4	0	15	0	4	14	k__Bacteria;p__Proteobacteria;c__Gammaproteobacteria;o__Xanthomonadales;f__Xanthomonadaceae;g__Luteimonas;s__Lysobacter_sp.
OTU_1015	10	24	3	2	3	8	26	37	k__Bacteria;p__Proteobacteria;c__Alphaproteobacteria;o__Acetobacterales;f__Acetobacteraceae	19	1	9	4	64	4	1	4	3	4	1	0	7	0	1	17	0	5	9	19	50	3	80	28	k__Bacteria;p__Proteobacteria;c__Alphaproteobacteria;o__Acetobacterales;f__Acetobacteraceae
OTU_1016	2	1	1	53	3	0	0	0	k__Bacteria;p__Firmicutes;c__Clostridia;o__Lachnospirales;f__Lachnospiraceae	0	0	4	1	0	1	0	0	1	159	0	0	6	0	3	0	0	0	0	0	0	0	0	0	k__Bacteria;p__Firmicutes;c__Clostridia;o__Lachnospirales;f__Lachnospiraceae
OTU_1017	0	0	15	0	0	1	58	3	k__Bacteria;p__Proteobacteria;c__Gammaproteobacteria;o__Burkholderiales;f__Nitrosomonadaceae;g__oc32;s__	0	0	0	0	0	0	2	20	21	0	0	0	0	0	0	0	0	2	20	50	103	0	1	7	k__Bacteria;p__Proteobacteria;c__Gammaproteobacteria;o__Burkholderiales;f__Nitrosomonadaceae;g__oc32;s__
OTU_1018	0	0	6	0	0	0	14	2	k__Bacteria;p__Myxococcota;c__Polyangia;o__Polyangiales;f__BIrii41;g__BIrii41;s__	0	0	0	0	0	0	0	0	18	0	0	0	0	0	0	0	0	0	5	1	36	0	2	2	k__Bacteria;p__Myxococcota;c__Polyangia;o__Polyangiales;f__BIrii41;g__BIrii41;s__
OTU_1019	0	0	0	10	1	0	0	0	k__Bacteria	0	0	0	0	0	0	0	0	0	1	24	4	2	0	0	0	0	0	0	0	0	0	0	0	k__Bacteria
OTU_1020	0	7	0	0	6	0	0	0	k__Bacteria	0	0	0	21	0	0	0	0	0	0	0	0	17	0	1	0	0	0	0	0	0	0	0	0	k__Bacteria
OTU_1021	1	1	8	0	0	2	2	0	k__Bacteria;p__Firmicutes;c__Clostridia;o__Clostridia;f__Hungateiclostridiaceae;g__Ercella	0	1	0	0	0	3	22	0	0	0	0	0	0	0	0	0	4	0	6	0	0	0	0	0	k__Bacteria;p__Firmicutes;c__Clostridia;o__Clostridia;f__Hungateiclostridiaceae;g__Ercella
OTU_1022	0	2	0	0	1	4	0	0	Unknown	0	0	0	0	0	6	0	0	0	0	0	0	0	0	1	0	0	12	0	0	0	0	0	0	Unknown
OTU_1023	1	0	3	0	0	0	12	1	k__Bacteria;p__Proteobacteria;c__Alphaproteobacteria;o__Rhizobiales;f__A0839;g__A0839;s__	1	0	0	0	0	0	0	0	7	0	0	0	0	0	0	0	0	0	1	0	33	0	1	2	k__Bacteria;p__Proteobacteria;c__Alphaproteobacteria;o__Rhizobiales;f__A0839;g__A0839;s__
OTU_1024	3	15	0	0	0	2	1	0	k__Bacteria;p__Cyanobacteria;c__Cyanobacteriia;o__Chloroplast;f__Chloroplast;g__Chloroplast;s__Coelastrella_sp.	5	1	3	2	39	3	0	0	0	0	0	0	0	0	0	5	0	0	1	0	0	0	0	0	k__Bacteria;p__Cyanobacteria;c__Cyanobacteriia;o__Chloroplast;f__Chloroplast;g__Chloroplast;s__Coelastrella_sp.
OTU_1025	0	0	0	3	0	1	3	10	k__Bacteria;p__Firmicutes;c__Clostridia;o__Clostridia;f__Hungateiclostridiaceae	0	0	0	0	0	0	0	0	0	7	0	0	0	0	0	0	0	2	3	0	4	0	19	10	k__Bacteria;p__Firmicutes;c__Clostridia;o__Clostridia;f__Hungateiclostridiaceae
OTU_1026	1	1	2	1	0	0	0	0	Unknown	0	2	0	0	2	0	2	2	0	1	1	0	0	0	0	0	0	0	0	0	0	0	0	0	Unknown
OTU_1027	1	1	6	16	3	2	0	5	k__Bacteria;p__Firmicutes;c__Clostridia;o__Lachnospirales;f__Lachnospiraceae;g__Sellimonas;s__	1	1	0	0	0	1	8	1	8	45	2	0	4	1	4	1	5	0	0	0	0	0	13	2	k__Bacteria;p__Firmicutes;c__Clostridia;o__Lachnospirales;f__Lachnospiraceae;g__Sellimonas;s__
OTU_1028	0	0	3	2	1	2	0	0	k__Bacteria;p__Proteobacteria;c__Alphaproteobacteria;o__Rhizobiales;f__D05-2;g__D05-2;s__alpha_proteobacterium	0	0	0	0	0	0	3	1	3	5	0	0	0	0	1	2	2	1	0	0	0	0	0	0	k__Bacteria;p__Proteobacteria;c__Alphaproteobacteria;o__Rhizobiales;f__D05-2;g__D05-2;s__alpha_proteobacterium
OTU_1029	10	2	0	0	1	1	2	1	k__Bacteria;p__Actinobacteriota;c__Acidimicrobiia;o__Microtrichales;f__Ilumatobacteraceae	0	2	26	0	4	0	0	0	0	0	0	0	3	0	0	0	0	1	3	0	3	0	0	2	k__Bacteria;p__Actinobacteriota;c__Acidimicrobiia;o__Microtrichales;f__Ilumatobacteraceae
OTU_1030	4	3	1	4	0	2	4	19	k__Bacteria;p__Proteobacteria;c__Gammaproteobacteria;o__Xanthomonadales;f__Xanthomonadaceae;g__Thermomonas;s__	12	0	0	1	3	5	0	1	0	0	9	1	0	0	0	1	1	2	9	0	2	15	5	35	k__Bacteria;p__Proteobacteria;c__Gammaproteobacteria;o__Xanthomonadales;f__Xanthomonadaceae;g__Thermomonas;s__
OTU_1031	1	3	1	0	1	0	9	3	k__Bacteria;p__Armatimonadota;c__Fimbriimonadia;o__Fimbriimonadales;f__Fimbriimonadaceae;g__Fimbriimonadaceae;s__	1	0	0	9	0	0	0	0	3	0	0	0	1	0	0	0	0	0	4	1	21	0	1	8	k__Bacteria;p__Armatimonadota;c__Fimbriimonadia;o__Fimbriimonadales;f__Fimbriimonadaceae;g__Fimbriimonadaceae;s__
OTU_1032	1	1	6	1	1	1	13	4	k__Bacteria;p__Chloroflexi;c__KD4-96;o__KD4-96;f__KD4-96;g__KD4-96;s__	1	1	0	0	1	0	8	4	5	0	3	0	0	1	0	0	0	1	11	16	11	0	3	8	k__Bacteria;p__Chloroflexi;c__KD4-96;o__KD4-96;f__KD4-96;g__KD4-96;s__
OTU_1033	5	1	9	19	6	3	2	2	k__Bacteria;p__Actinobacteriota;c__Actinobacteria;o__Corynebacteriales;f__Corynebacteriaceae;g__Corynebacterium;s__Corynebacterium_ureicelerivorans	4	0	11	0	2	0	14	7	4	28	24	4	4	0	12	5	3	0	4	0	0	0	0	5	k__Bacteria;p__Actinobacteriota;c__Actinobacteria;o__Corynebacteriales;f__Corynebacteriaceae;g__Corynebacterium;s__Corynebacterium_ureicelerivorans
OTU_1034	2	0	4	23	0	0	0	0	Unknown	0	0	4	0	0	0	0	11	0	41	14	12	0	0	0	0	0	0	0	0	0	0	0	0	Unknown
OTU_1035	0	0	3	0	0	0	15	1	k__Bacteria;p__Planctomycetota;c__Planctomycetes;o__Planctomycetales;f__Schlesneriaceae;g__Planctopirus;s__	0	0	0	0	0	0	0	9	0	0	0	0	0	0	0	0	0	0	10	35	0	1	0	0	k__Bacteria;p__Planctomycetota;c__Planctomycetes;o__Planctomycetales;f__Schlesneriaceae;g__Planctopirus;s__
OTU_1036	0	0	1	12	0	0	0	0	Unknown	0	0	0	0	0	0	1	0	0	3	21	12	0	0	0	0	0	0	0	0	0	0	0	0	Unknown
OTU_1037	1	1	5	0	0	2	39	6	k__Bacteria;p__Verrucomicrobiota;c__Verrucomicrobiae;o__Opitutales;f__Opitutaceae	1	0	0	0	2	0	12	0	2	0	0	0	0	0	0	2	0	3	90	4	21	4	6	7	k__Bacteria;p__Verrucomicrobiota;c__Verrucomicrobiae;o__Opitutales;f__Opitutaceae
OTU_1038	0	0	1	0	0	0	11	11	k__Bacteria;p__Bacteroidota;c__Bacteroidia;o__Cytophagales	0	0	0	0	0	0	1	0	0	0	0	0	0	0	0	0	0	0	28	1	2	0	7	24	k__Bacteria;p__Bacteroidota;c__Bacteroidia;o__Cytophagales
OTU_1039	1	1	3	0	1	1	20	4	k__Bacteria;p__Actinobacteriota;c__Actinobacteria;o__Pseudonocardiales;f__Pseudonocardiaceae;g__Pseudonocardia	2	0	1	1	0	1	9	0	0	0	0	0	2	1	0	0	0	1	42	7	10	0	1	9	k__Bacteria;p__Actinobacteriota;c__Actinobacteria;o__Pseudonocardiales;f__Pseudonocardiaceae;g__Pseudonocardia
OTU_1040	0	0	1	22	0	0	0	0	k__Bacteria;p__Firmicutes;c__Bacilli;o__Lactobacillales;f__Listeriaceae;g__Brochothrix;s__Brochothrix_thermosphacta	0	0	0	0	0	0	0	2	1	64	0	0	0	0	0	0	0	0	0	0	0	0	0	0	k__Bacteria;p__Firmicutes;c__Bacilli;o__Lactobacillales;f__Listeriaceae;g__Brochothrix;s__Brochothrix_thermosphacta
OTU_1041	10	0	2	22	12	1	1	3	k__Bacteria;p__Desulfobacterota;c__Desulfovibrionia;o__Desulfovibrionales;f__Desulfovibrionaceae;g__;s__	3	0	25	0	0	0	3	2	0	60	3	2	34	0	0	0	1	0	1	0	0	1	0	6	k__Bacteria;p__Desulfobacterota;c__Desulfovibrionia;o__Desulfovibrionales;f__Desulfovibrionaceae;g__;s__
OTU_1042	12	0	0	0	0	0	1	0	k__Bacteria;p__Bacteroidota;c__Bacteroidia;o__Chitinophagales;f__Chitinophagaceae	2	0	34	0	0	0	0	0	0	0	0	0	0	0	0	0	0	0	0	0	2	0	0	0	k__Bacteria;p__Bacteroidota;c__Bacteroidia;o__Chitinophagales;f__Chitinophagaceae
OTU_1043	14	10	1	0	5	2	4	1	k__Bacteria;p__Proteobacteria;c__Gammaproteobacteria;o__Alteromonadales;f__Alteromonadaceae;g__Rheinheimera;s__	6	5	30	2	4	24	0	0	1	0	0	0	13	2	0	0	4	0	3	0	7	0	0	2	k__Bacteria;p__Proteobacteria;c__Gammaproteobacteria;o__Alteromonadales;f__Alteromonadaceae;g__Rheinheimera;s__
OTU_1044	0	2	9	0	0	1	5	0	k__Bacteria;p__Synergistota;c__Synergistia;o__Synergistales;f__Synergistaceae	0	0	0	0	0	4	25	0	0	0	0	0	0	0	0	0	2	0	15	0	0	0	0	0	k__Bacteria;p__Synergistota;c__Synergistia;o__Synergistales;f__Synergistaceae
OTU_1045	42	0	0	0	0	0	0	0	Unknown	29	47	50	0	0	0	0	0	0	0	0	0	0	0	0	0	0	0	0	0	0	0	0	0	Unknown
OTU_1046	0	0	3	22	2	1	0	0	k__Bacteria;p__Actinobacteriota;c__Coriobacteriia;o__Coriobacteriales;f__Eggerthellaceae;g__Eggerthella;s__	0	0	0	0	0	0	4	2	1	64	0	0	1	1	3	0	1	0	0	0	0	0	0	0	k__Bacteria;p__Actinobacteriota;c__Coriobacteriia;o__Coriobacteriales;f__Eggerthellaceae;g__Eggerthella;s__
OTU_1047	2	1	0	1	0	1	2	19	k__Bacteria;p__Actinobacteriota;c__Acidimicrobiia;o__Microtrichales;f__;g__;s__	2	2	2	0	0	2	0	0	0	0	1	0	0	0	0	0	0	2	3	1	2	23	7	27	k__Bacteria;p__Actinobacteriota;c__Acidimicrobiia;o__Microtrichales;f__;g__;s__
OTU_1048	3	1	1	1	1	2	3	3	k__Bacteria;p__Actinobacteriota;c__Actinobacteria;o__Micrococcales	4	3	1	1	0	0	0	0	3	0	1	1	0	3	0	0	2	2	0	0	8	3	1	3	k__Bacteria;p__Actinobacteriota;c__Actinobacteria;o__Micrococcales
OTU_1049	1	2	7	1	0	3	3	0	k__Bacteria;p__Bacteroidota;c__Bacteroidia;o__Bacteroidales;f__Dysgonomonadaceae;g__;s__	0	1	0	0	0	4	19	0	0	0	0	2	0	0	0	0	7	0	7	0	0	0	0	0	k__Bacteria;p__Bacteroidota;c__Bacteroidia;o__Bacteroidales;f__Dysgonomonadaceae;g__;s__
OTU_1051	0	0	6	0	0	0	6	0	k__Bacteria;p__Proteobacteria;c__Gammaproteobacteria;o__1013-28-CG33;f__1013-28-CG33;g__1013-28-CG33	0	0	0	0	0	0	18	0	0	0	0	0	0	0	0	0	0	0	17	0	0	0	0	0	k__Bacteria;p__Proteobacteria;c__Gammaproteobacteria;o__1013-28-CG33;f__1013-28-CG33;g__1013-28-CG33
OTU_1052	15	2	3	1	0	2	20	2	k__Bacteria;p__Myxococcota;c__Polyangia;o__mle1-27;f__mle1-27;g__mle1-27;s__	27	16	2	0	4	0	7	2	0	0	1	0	0	0	0	0	0	6	43	8	7	0	0	5	k__Bacteria;p__Myxococcota;c__Polyangia;o__mle1-27;f__mle1-27;g__mle1-27;s__
OTU_1053	1	2	0	1	0	1	1	16	k__Bacteria;p__Bacteroidota;c__Bacteroidia;o__Bacteroidales;f__Marinilabiliaceae	3	0	0	1	5	0	0	0	0	2	1	0	0	0	0	3	0	0	2	0	1	0	35	13	k__Bacteria;p__Bacteroidota;c__Bacteroidia;o__Bacteroidales;f__Marinilabiliaceae
OTU_1054	1	19	0	0	0	1	0	0	k__Bacteria	1	0	0	0	55	0	0	0	0	0	0	0	0	0	0	0	0	1	0	0	0	0	0	0	k__Bacteria
OTU_1055	1	0	1	3	0	4	0	0	k__Bacteria;p__Chloroflexi;c__Chloroflexia;o__Thermomicrobiales;f__JG30-KF-CM45;g__JG30-KF-CM45	0	0	1	0	0	0	1	2	0	2	3	3	0	0	0	2	2	8	0	0	0	0	0	0	k__Bacteria;p__Chloroflexi;c__Chloroflexia;o__Thermomicrobiales;f__JG30-KF-CM45;g__JG30-KF-CM45
OTU_1056	0	0	1	0	0	1	20	1	k__Bacteria;p__Bacteroidota;c__Bacteroidia;o__Chitinophagales;f__37-13;g__37-13;s__	0	0	0	0	0	0	0	0	1	0	0	0	0	0	0	0	0	1	2	0	57	0	0	1	k__Bacteria;p__Bacteroidota;c__Bacteroidia;o__Chitinophagales;f__37-13;g__37-13;s__
OTU_1057	1	1	14	0	0	1	7	0	k__Bacteria;p__Campilobacterota;c__Campylobacteria;o__Campylobacterales;f__Rs-M59_termite_group;g__Rs-M59_termite_group;s__	0	0	1	1	0	0	40	1	1	0	0	0	0	0	0	0	1	0	21	0	0	0	0	0	k__Bacteria;p__Campilobacterota;c__Campylobacteria;o__Campylobacterales;f__Rs-M59_termite_group;g__Rs-M59_termite_group;s__
OTU_1058	12	1	0	0	2	0	1	0	k__Bacteria;p__Planctomycetota;c__OM190;o__OM190;f__OM190;g__OM190;s__	0	0	34	0	0	2	0	0	0	0	0	0	4	0	0	0	0	0	0	0	1	0	0	0	k__Bacteria;p__Planctomycetota;c__OM190;o__OM190;f__OM190;g__OM190;s__
OTU_1059	8	6	12	5	9	7	1	2	k__Bacteria;p__Actinobacteriota;c__Actinobacteria;o__Micrococcales;f__Micrococcaceae;g__Micrococcus;s__Micrococcus_luteus	6	1	15	15	2	1	30	5	1	8	4	3	16	3	7	6	10	4	3	0	0	1	1	3	k__Bacteria;p__Actinobacteriota;c__Actinobacteria;o__Micrococcales;f__Micrococcaceae;g__Micrococcus;s__Micrococcus_luteus
OTU_1060	0	0	2	0	0	0	20	2	k__Bacteria;p__Bacteroidota;c__Bacteroidia;o__Chitinophagales;f__Chitinophagaceae;g__Ferruginibacter;s__	0	0	0	0	0	0	2	2	0	0	0	0	0	0	0	0	0	0	7	1	50	0	4	0	k__Bacteria;p__Bacteroidota;c__Bacteroidia;o__Chitinophagales;f__Chitinophagaceae;g__Ferruginibacter;s__
OTU_1061	1	0	5	1	0	1	21	6	k__Bacteria;p__Proteobacteria;c__Alphaproteobacteria;o__Caulobacterales;f__Hyphomonadaceae;g__SWB02;s__	0	0	1	0	0	0	0	0	13	2	1	0	0	0	0	0	0	3	2	4	56	10	2	5	k__Bacteria;p__Proteobacteria;c__Alphaproteobacteria;o__Caulobacterales;f__Hyphomonadaceae;g__SWB02;s__
OTU_1062	1	0	2	1	0	0	12	25	k__Bacteria;p__Actinobacteriota;c__Acidimicrobiia	1	0	0	0	0	0	0	0	5	0	1	0	0	0	0	0	0	0	7	2	27	37	7	29	k__Bacteria;p__Actinobacteriota;c__Acidimicrobiia
OTU_1063	10	4	1	9	1	1	0	1	k__Bacteria;p__Bacteroidota;c__Bacteroidia;o__Bacteroidales;f__Rikenellaceae;g__Alistipes;s__Alistipes_onderdonkii	9	15	5	8	1	1	2	1	0	18	1	6	1	1	1	0	1	0	0	0	0	0	0	1	k__Bacteria;p__Bacteroidota;c__Bacteroidia;o__Bacteroidales;f__Rikenellaceae;g__Alistipes;s__Alistipes_onderdonkii
OTU_1064	5	0	0	0	6	0	0	0	k__Bacteria;p__Firmicutes;c__Clostridia;o__Oscillospirales;f__Eubacterium_coprostanoligenes_group;g__Eubacterium_coprostanoligenes_group;s__	0	0	15	0	0	0	0	0	0	0	0	0	17	0	0	0	0	0	0	0	0	0	0	0	k__Bacteria;p__Firmicutes;c__Clostridia;o__Oscillospirales;f__Eubacterium_coprostanoligenes_group;g__Eubacterium_coprostanoligenes_group;s__
OTU_1065	0	0	1	11	0	0	0	0	Unknown	0	0	0	0	0	0	0	1	0	32	0	0	0	0	0	0	0	0	0	0	0	0	0	0	Unknown
OTU_1066	1	1	4	3	3	5	0	2	k__Bacteria;p__Proteobacteria;c__Gammaproteobacteria;o__Burkholderiales;f__Rhodocyclaceae	0	0	1	2	0	0	4	5	2	1	5	2	0	1	8	3	2	9	0	0	0	6	0	0	k__Bacteria;p__Proteobacteria;c__Gammaproteobacteria;o__Burkholderiales;f__Rhodocyclaceae
OTU_1067	1	1	0	0	1	0	0	1	k__Bacteria;p__Actinobacteriota;c__Acidimicrobiia	0	2	0	1	0	0	0	0	0	0	0	0	0	2	0	0	0	0	0	0	0	0	0	1	k__Bacteria;p__Actinobacteriota;c__Acidimicrobiia
OTU_1068	0	1	4	0	0	1	13	0	k__Bacteria;p__Proteobacteria;c__Gammaproteobacteria;o__Burkholderiales;f__Neisseriaceae	0	0	0	0	1	0	0	12	0	0	0	0	0	0	0	0	0	2	2	35	2	0	0	0	k__Bacteria;p__Proteobacteria;c__Gammaproteobacteria;o__Burkholderiales;f__Neisseriaceae
OTU_1069	0	1	1	1	0	1	31	8	k__Bacteria;p__Nitrospirota;c__Nitrospiria;o__Nitrospirales;f__Nitrospiraceae;g__Nitrospira	0	0	0	3	0	0	0	0	3	1	0	0	0	0	0	0	0	1	56	0	37	17	1	6	k__Bacteria;p__Nitrospirota;c__Nitrospiria;o__Nitrospirales;f__Nitrospiraceae;g__Nitrospira
OTU_1070	0	0	3	1	1	3	0	0	k__Bacteria;p__Chloroflexi;c__Chloroflexia;o__Chloroflexales;f__Chloroflexaceae	0	0	0	0	0	0	2	1	4	0	1	0	0	0	3	1	2	4	0	0	0	0	0	0	k__Bacteria;p__Chloroflexi;c__Chloroflexia;o__Chloroflexales;f__Chloroflexaceae
OTU_1071	0	0	0	1	12	0	0	0	Unknown	0	0	0	0	0	0	0	0	0	0	0	1	0	0	35	0	0	0	0	0	0	0	0	0	Unknown
OTU_1072	2	16	0	0	3	1	0	2	k__Bacteria;p__Firmicutes;c__Bacilli;o__Bacillales;f__Bacillaceae;g__Bacillus;s__Bacillus_gibsonii	0	5	1	41	3	2	0	0	0	0	0	0	0	0	9	2	0	0	0	0	0	5	0	0	k__Bacteria;p__Firmicutes;c__Bacilli;o__Bacillales;f__Bacillaceae;g__Bacillus;s__Bacillus_gibsonii
OTU_1073	0	0	6	0	0	1	19	4	k__Bacteria;p__Firmicutes;c__Bacilli;o__Paenibacillales;f__Paenibacillaceae;g__Paenibacillus;s__	0	0	0	0	0	0	15	0	1	0	0	0	0	0	0	0	0	3	36	0	20	0	3	7	k__Bacteria;p__Firmicutes;c__Bacilli;o__Paenibacillales;f__Paenibacillaceae;g__Paenibacillus;s__
OTU_1074	1	0	5	1	0	1	11	4	k__Bacteria;p__Acidobacteriota;c__Acidobacteriae	3	0	0	0	0	0	2	9	2	0	1	0	0	0	0	0	0	1	6	19	7	5	2	3	k__Bacteria;p__Acidobacteriota;c__Acidobacteriae
OTU_1075	0	0	2	0	0	1	11	2	k__Bacteria;p__Acidobacteriota;c__Blastocatellia;o__11-24;f__11-24;g__11-24;s__	0	0	0	0	0	0	2	0	4	0	0	0	0	0	0	0	0	2	10	3	19	0	2	2	k__Bacteria;p__Acidobacteriota;c__Blastocatellia;o__11-24;f__11-24;g__11-24;s__
OTU_1076	0	0	2	0	0	0	19	1	k__Bacteria;p__Dependentiae;c__Babeliae;o__Babeliales;f__Babeliales;g__Babeliales;s__	0	0	0	0	0	0	0	1	4	0	0	0	0	0	0	0	0	0	8	6	42	0	0	2	k__Bacteria;p__Dependentiae;c__Babeliae;o__Babeliales;f__Babeliales;g__Babeliales;s__
OTU_1077	2	15	0	0	0	3	0	1	k__Bacteria;p__Cyanobacteria;c__Cyanobacteriia;o__Chloroplast;f__Chloroplast;g__Chloroplast;s__Oscillatoriales_cyanobacterium	2	1	2	2	36	5	0	0	0	0	0	0	0	0	0	9	0	0	0	0	0	1	0	1	k__Bacteria;p__Cyanobacteria;c__Cyanobacteriia;o__Chloroplast;f__Chloroplast;g__Chloroplast;s__Oscillatoriales_cyanobacterium
OTU_1078	0	0	0	16	0	0	0	0	k__Bacteria	0	0	0	0	0	0	0	0	0	48	0	0	0	0	0	0	0	0	0	0	0	0	0	0	k__Bacteria
OTU_1079	1	3	0	0	2	1	3	23	k__Bacteria;p__Chloroflexi;c__KD4-96;o__KD4-96;f__KD4-96;g__KD4-96;s__	3	0	0	5	1	2	0	0	0	0	0	0	0	4	0	0	1	0	3	4	2	27	9	32	k__Bacteria;p__Chloroflexi;c__KD4-96;o__KD4-96;f__KD4-96;g__KD4-96;s__
OTU_1080	2	0	3	8	2	1	0	0	k__Bacteria;p__Bacteroidota;c__Bacteroidia;o__Flavobacteriales;f__Weeksellaceae;g__Elizabethkingia	0	4	0	0	0	0	2	1	5	1	3	19	0	3	3	2	1	0	0	0	0	0	0	0	k__Bacteria;p__Bacteroidota;c__Bacteroidia;o__Flavobacteriales;f__Weeksellaceae;g__Elizabethkingia
OTU_1081	0	0	2	0	0	1	15	0	k__Bacteria;p__Proteobacteria;c__Alphaproteobacteria;o__Rickettsiales	0	0	0	0	0	0	3	1	0	0	0	0	0	0	0	0	0	1	42	2	1	0	0	0	k__Bacteria;p__Proteobacteria;c__Alphaproteobacteria;o__Rickettsiales
OTU_1082	1	3	4	1	1	0	22	5	k__Bacteria;p__Proteobacteria;c__Gammaproteobacteria;o__Burkholderiales;f__Burkholderiaceae;g__Lautropia;s__	1	0	0	9	0	0	8	3	0	0	1	0	0	0	2	0	0	0	63	0	3	6	1	8	k__Bacteria;p__Proteobacteria;c__Gammaproteobacteria;o__Burkholderiales;f__Burkholderiaceae;g__Lautropia;s__
OTU_1083	2	1	2	0	0	0	0	0	Unknown	0	0	6	0	0	1	0	1	3	0	0	0	0	0	0	0	0	0	0	0	0	0	0	0	Unknown
OTU_1084	0	1	0	1	0	1	7	8	k__Bacteria;p__Planctomycetota;c__Planctomycetes;o__Pirellulales;f__Pirellulaceae;g__Pirellula	0	0	0	0	2	0	0	0	0	1	0	0	0	0	0	0	0	1	0	1	20	0	19	5	k__Bacteria;p__Planctomycetota;c__Planctomycetes;o__Pirellulales;f__Pirellulaceae;g__Pirellula
OTU_1085	2	2	7	1	0	3	2	0	k__Bacteria;p__Firmicutes;c__Clostridia;o__Peptostreptococcales-Tissierellales;f__Peptostreptococcales-Tissierellales;g__W5053;s__	0	4	0	0	0	5	20	0	0	0	0	1	0	0	0	0	9	0	4	0	0	0	0	0	k__Bacteria;p__Firmicutes;c__Clostridia;o__Peptostreptococcales-Tissierellales;f__Peptostreptococcales-Tissierellales;g__W5053;s__
OTU_1086	4	0	3	0	1	1	6	1	k__Bacteria;p__Verrucomicrobiota;c__Verrucomicrobiae;o__Chthoniobacterales;f__Chthoniobacteraceae;g__LD29;s__	1	2	9	0	0	0	0	0	9	0	0	0	1	0	0	0	0	1	0	0	17	0	2	1	k__Bacteria;p__Verrucomicrobiota;c__Verrucomicrobiae;o__Chthoniobacterales;f__Chthoniobacteraceae;g__LD29;s__
OTU_1087	0	19	0	0	1	0	0	0	k__Bacteria	0	0	0	55	0	0	0	0	0	0	0	0	0	0	1	0	0	0	0	0	0	0	0	0	k__Bacteria
OTU_1088	1	3	1	0	1	1	8	17	k__Bacteria;p__Verrucomicrobiota;c__Verrucomicrobiae;o__Verrucomicrobiales;f__Verrucomicrobiaceae;g__Brevifollis	2	1	0	1	1	7	1	0	0	0	0	0	1	1	0	1	0	0	18	2	4	1	7	43	k__Bacteria;p__Verrucomicrobiota;c__Verrucomicrobiae;o__Verrucomicrobiales;f__Verrucomicrobiaceae;g__Brevifollis
OTU_1089	0	0	2	1	2	2	0	0	k__Bacteria;p__Bacteroidota;c__Bacteroidia;o__Flavobacteriales;f__Crocinitomicaceae;g__Fluviicola	0	0	0	0	0	0	3	1	2	0	1	0	1	0	3	4	1	1	0	0	0	0	0	0	k__Bacteria;p__Bacteroidota;c__Bacteroidia;o__Flavobacteriales;f__Crocinitomicaceae;g__Fluviicola
OTU_1090	15	17	3	3	8	3	10	19	k__Bacteria;p__Proteobacteria;c__Alphaproteobacteria;o__Rhizobiales;f__Rhizobiaceae;g__Mesorhizobium	10	10	24	35	3	11	6	3	0	1	4	3	7	5	11	0	3	5	22	2	6	42	2	12	k__Bacteria;p__Proteobacteria;c__Alphaproteobacteria;o__Rhizobiales;f__Rhizobiaceae;g__Mesorhizobium
OTU_1091	3	1	5	21	3	5	11	2	k__Bacteria;p__Proteobacteria;c__Gammaproteobacteria;o__Burkholderiales;f__Burkholderiaceae;g__Limnobacter;s__Limnobacter_sp.	1	1	7	0	1	1	4	1	8	59	1	2	2	2	4	0	0	13	2	1	30	1	1	4	k__Bacteria;p__Proteobacteria;c__Gammaproteobacteria;o__Burkholderiales;f__Burkholderiaceae;g__Limnobacter;s__Limnobacter_sp.
OTU_1092	0	1	6	0	0	1	6	0	k__Bacteria;p__Firmicutes;c__Clostridia;o__Oscillospirales	0	0	0	0	0	1	16	0	0	0	0	0	0	0	0	0	1	0	16	0	0	0	0	0	k__Bacteria;p__Firmicutes;c__Clostridia;o__Oscillospirales
OTU_1093	1	0	2	9	1	0	0	0	Unknown	0	2	0	0	0	0	0	2	3	23	3	1	1	0	0	0	0	0	0	0	0	0	0	0	Unknown
OTU_1094	0	0	2	15	1	2	0	1	k__Bacteria;p__Bacteroidota;c__Bacteroidia;o__Bacteroidales;f__Muribaculaceae;g__Muribaculaceae;s__	0	0	0	0	0	0	3	0	2	40	4	0	0	0	2	2	2	0	0	0	0	0	0	2	k__Bacteria;p__Bacteroidota;c__Bacteroidia;o__Bacteroidales;f__Muribaculaceae;g__Muribaculaceae;s__
OTU_1095	4	2	83	754	40	33	1	49	k__Bacteria;p__Firmicutes;c__Clostridia;o__Lachnospirales;f__Lachnospiraceae;g__Blautia	9	1	1	4	0	0	116	77	54	2174	51	35	32	29	58	23	76	0	0	0	1	0	141	4	k__Bacteria;p__Firmicutes;c__Clostridia;o__Lachnospirales;f__Lachnospiraceae;g__Blautia
OTU_1096	0	0	3	0	0	1	23	0	Unknown	0	0	0	0	0	0	7	2	0	0	0	0	0	0	0	0	0	1	36	32	0	0	0	0	Unknown
OTU_1097	15	8	0	0	1	1	3	5	k__Bacteria;p__Cyanobacteria;c__Cyanobacteriia;o__Oxyphotobacteria_Incertae_Sedis;f__Unknown_Family;g__Leptolyngbya_ANT.L52.2	7	7	31	0	3	20	0	0	0	0	0	0	2	0	0	1	1	0	3	3	1	0	2	12	k__Bacteria;p__Cyanobacteria;c__Cyanobacteriia;o__Oxyphotobacteria_Incertae_Sedis;f__Unknown_Family;g__Leptolyngbya_ANT.L52.2
OTU_1098	1	0	1	0	0	2	12	1	k__Bacteria;p__Patescibacteria;c__Saccharimonadia;o__Saccharimonadales;f__Saccharimonadales;g__Saccharimonadales;s__	0	3	0	0	0	0	2	0	0	0	0	0	0	0	0	0	0	4	31	0	4	0	2	1	k__Bacteria;p__Patescibacteria;c__Saccharimonadia;o__Saccharimonadales;f__Saccharimonadales;g__Saccharimonadales;s__
OTU_1099	0	1	0	0	0	9	0	0	Unknown	0	0	0	0	0	2	0	0	0	0	0	0	0	0	0	0	0	27	0	0	0	0	0	0	Unknown
OTU_1100	0	0	3	0	0	1	14	1	k__Bacteria;p__Bdellovibrionota;c__Oligoflexia;o__Oligoflexales;f__;g__;s__	0	0	0	0	0	0	0	0	9	0	0	0	0	0	0	0	0	2	2	0	38	0	0	2	k__Bacteria;p__Bdellovibrionota;c__Oligoflexia;o__Oligoflexales;f__;g__;s__
OTU_1101	0	0	0	0	0	0	0	20	k__Bacteria;p__Proteobacteria;c__Gammaproteobacteria;o__Burkholderiales;f__SC-I-84;g__SC-I-84;s__	0	0	0	0	0	0	0	0	0	0	0	0	0	0	0	0	0	0	0	0	0	55	0	5	k__Bacteria;p__Proteobacteria;c__Gammaproteobacteria;o__Burkholderiales;f__SC-I-84;g__SC-I-84;s__
OTU_1102	1	2	5	1	0	3	3	0	k__Bacteria;p__Firmicutes;c__Clostridia;o__Christensenellales;f__Christensenellaceae;g__Christensenellaceae_R-7_group;s__	0	1	0	0	0	4	14	0	0	0	0	1	0	0	0	0	7	0	8	0	0	0	0	0	k__Bacteria;p__Firmicutes;c__Clostridia;o__Christensenellales;f__Christensenellaceae;g__Christensenellaceae_R-7_group;s__
OTU_1103	1	2	0	1	1	0	9	20	k__Bacteria;p__Nitrospirota;c__Nitrospiria;o__Nitrospirales;f__Nitrospiraceae;g__Nitrospira	0	0	1	4	0	0	0	0	0	0	2	0	0	0	1	0	0	0	11	0	16	53	1	5	k__Bacteria;p__Nitrospirota;c__Nitrospiria;o__Nitrospirales;f__Nitrospiraceae;g__Nitrospira
OTU_1104	1	0	0	1	1	0	0	0	k__Bacteria;p__Firmicutes;c__Bacilli;o__Lactobacillales;f__Carnobacteriaceae;g__Carnobacterium	1	0	0	0	0	0	0	0	0	0	1	0	1	0	0	0	0	0	0	0	0	0	0	0	k__Bacteria;p__Firmicutes;c__Bacilli;o__Lactobacillales;f__Carnobacteriaceae;g__Carnobacterium
OTU_1105	0	0	0	15	0	0	0	0	k__Bacteria;p__Proteobacteria;c__Gammaproteobacteria;o__Burkholderiales;f__MWH-UniP1_aquatic_group;g__MWH-UniP1_aquatic_group;s__	0	0	0	0	0	0	0	0	0	45	0	0	0	0	0	0	0	0	0	0	0	0	0	0	k__Bacteria;p__Proteobacteria;c__Gammaproteobacteria;o__Burkholderiales;f__MWH-UniP1_aquatic_group;g__MWH-UniP1_aquatic_group;s__
OTU_1106	4	1	3	6	4	6	1	4	k__Bacteria;p__Firmicutes;c__Bacilli;o__Lactobacillales;f__Lactobacillaceae;g__Lactobacillus	5	3	4	1	0	0	4	2	1	9	3	5	10	2	0	5	1	11	0	0	1	0	2	8	k__Bacteria;p__Firmicutes;c__Bacilli;o__Lactobacillales;f__Lactobacillaceae;g__Lactobacillus
OTU_1107	2	1	5	6	3	2	0	0	k__Bacteria;p__Firmicutes;c__Bacilli;o__Alicyclobacillales;f__Alicyclobacillaceae;g__Tumebacillus	0	0	5	0	1	0	8	3	2	0	14	3	6	2	1	3	1	0	0	0	0	0	0	0	k__Bacteria;p__Firmicutes;c__Bacilli;o__Alicyclobacillales;f__Alicyclobacillaceae;g__Tumebacillus
OTU_1108	0	0	2	9	0	0	0	0	k__Bacteria	0	0	0	0	0	0	0	4	0	27	0	0	0	0	0	0	0	0	0	0	0	0	0	0	k__Bacteria
OTU_1109	3	9	0	0	2	1	0	1	k__Bacteria;p__Bdellovibrionota;c__Bdellovibrionia;o__Bdellovibrionales;f__Bdellovibrionaceae;g__Bdellovibrio	3	2	2	1	22	2	0	0	0	0	0	0	0	4	1	2	0	0	0	0	0	0	1	1	k__Bacteria;p__Bdellovibrionota;c__Bdellovibrionia;o__Bdellovibrionales;f__Bdellovibrionaceae;g__Bdellovibrio
OTU_1110	0	0	0	24	0	0	0	1	k__Bacteria;p__Bacteroidota;c__Bacteroidia;o__Bacteroidales;f__Muribaculaceae;g__Muribaculum;s__	0	0	0	0	0	0	0	0	0	68	2	0	0	0	0	0	0	0	0	0	0	1	0	0	k__Bacteria;p__Bacteroidota;c__Bacteroidia;o__Bacteroidales;f__Muribaculaceae;g__Muribaculum;s__
OTU_1111	0	0	2	0	0	0	14	1	k__Bacteria;p__Planctomycetota;c__Phycisphaerae;o__Phycisphaerales;f__Phycisphaeraceae;g__SM1A02	0	0	0	0	0	0	0	0	4	0	0	0	0	0	0	0	0	0	0	1	41	0	0	1	k__Bacteria;p__Planctomycetota;c__Phycisphaerae;o__Phycisphaerales;f__Phycisphaeraceae;g__SM1A02
OTU_1112	5	4	2	1	5	4	0	0	k__Bacteria;p__Firmicutes;c__Clostridia;o__Clostridiales;f__Clostridiaceae;g__Proteiniclasticum	5	8	1	2	0	10	5	0	0	0	0	2	0	13	0	0	10	0	0	0	0	0	0	0	k__Bacteria;p__Firmicutes;c__Clostridia;o__Clostridiales;f__Clostridiaceae;g__Proteiniclasticum
OTU_1113	0	0	3	1	0	1	0	5	k__Bacteria;p__Proteobacteria;c__Alphaproteobacteria;o__Rhizobiales;f__D05-2;g__D05-2;s__	0	0	0	0	0	0	2	1	4	0	1	0	0	0	0	0	2	1	0	0	0	13	0	0	k__Bacteria;p__Proteobacteria;c__Alphaproteobacteria;o__Rhizobiales;f__D05-2;g__D05-2;s__
OTU_1114	0	4	0	1	15	17	0	0	k__Bacteria	0	0	0	0	1	10	0	0	0	0	1	1	12	3	30	7	44	0	0	0	0	0	0	0	k__Bacteria
OTU_1115	1	1	1	0	0	0	1	16	k__Bacteria;p__Planctomycetota;c__Planctomycetes;o__Isosphaerales;f__Isosphaeraceae;g__Paludisphaera	3	0	0	0	3	0	1	0	0	0	0	0	0	0	0	0	0	0	0	0	2	0	36	11	k__Bacteria;p__Planctomycetota;c__Planctomycetes;o__Isosphaerales;f__Isosphaeraceae;g__Paludisphaera
OTU_1116	0	0	6	0	0	0	7	2	k__Bacteria;p__Proteobacteria;c__Alphaproteobacteria;o__Paracaedibacterales;f__Paracaedibacteraceae;g__Candidatus_Captivus;s__Candidatus_Captivus	0	0	0	0	0	0	3	14	0	0	0	0	0	0	0	0	0	0	1	19	0	0	3	2	k__Bacteria;p__Proteobacteria;c__Alphaproteobacteria;o__Paracaedibacterales;f__Paracaedibacteraceae;g__Candidatus_Captivus;s__Candidatus_Captivus
OTU_1117	1	4	6	2	0	3	7	16	k__Bacteria;p__Proteobacteria;c__Alphaproteobacteria;o__Rhizobiales;f__Beijerinckiaceae;g__Microvirga;s__Microvirga_sp.	2	0	1	6	3	3	8	2	6	1	3	0	0	0	0	0	2	6	6	0	15	27	5	15	k__Bacteria;p__Proteobacteria;c__Alphaproteobacteria;o__Rhizobiales;f__Beijerinckiaceae;g__Microvirga;s__Microvirga_sp.
OTU_1118	0	0	1	16	0	0	0	0	k__Bacteria;p__Proteobacteria;c__Gammaproteobacteria;o__Burkholderiales;f__Nitrosomonadaceae;g__Nitrosospira	0	0	0	0	0	0	0	1	0	46	1	0	0	0	0	0	0	0	0	0	0	0	0	0	k__Bacteria;p__Proteobacteria;c__Gammaproteobacteria;o__Burkholderiales;f__Nitrosomonadaceae;g__Nitrosospira
OTU_1119	0	6	0	1	2	6	0	0	k__Bacteria;p__Bacteroidota;c__Bacteroidia;o__Bacteroidales;f__Paludibacteraceae;g__;s__	0	0	0	1	0	15	0	0	0	0	1	0	1	3	0	0	16	0	0	0	0	0	0	0	k__Bacteria;p__Bacteroidota;c__Bacteroidia;o__Bacteroidales;f__Paludibacteraceae;g__;s__
OTU_1120	0	0	0	0	0	0	4	10	k__Bacteria;p__Planctomycetota;c__Planctomycetes;o__Planctomycetales;f__;g__;s__	0	0	0	0	0	0	0	0	0	0	0	0	0	0	0	0	0	0	0	0	10	29	0	0	k__Bacteria;p__Planctomycetota;c__Planctomycetes;o__Planctomycetales;f__;g__;s__
OTU_1121	1	7	0	1	0	0	0	12	k__Bacteria;p__Verrucomicrobiota;c__Verrucomicrobiae;o__Opitutales;f__Opitutaceae;g__Lacunisphaera;s__	1	0	0	0	19	0	0	0	0	1	0	0	0	0	0	0	0	0	0	0	0	0	28	7	k__Bacteria;p__Verrucomicrobiota;c__Verrucomicrobiae;o__Opitutales;f__Opitutaceae;g__Lacunisphaera;s__
OTU_1122	0	0	0	0	0	0	0	17	k__Bacteria;p__Proteobacteria;c__Gammaproteobacteria;o__Diplorickettsiales;f__Diplorickettsiaceae;g__Aquicella;s__	0	0	0	0	0	0	0	0	0	0	0	0	0	0	0	0	0	0	0	0	0	49	0	0	k__Bacteria;p__Proteobacteria;c__Gammaproteobacteria;o__Diplorickettsiales;f__Diplorickettsiaceae;g__Aquicella;s__
OTU_1123	0	0	1	0	0	1	0	0	k__Bacteria;p__Deinococcota;c__Deinococci;o__Thermales;f__Thermaceae;g__Meiothermus;s__Meiothermus_silvanus	0	0	0	0	0	0	0	2	0	0	0	0	0	0	0	0	1	0	0	0	0	0	0	0	k__Bacteria;p__Deinococcota;c__Deinococci;o__Thermales;f__Thermaceae;g__Meiothermus;s__Meiothermus_silvanus
OTU_1124	3	2	0	1	0	1	4	19	k__Bacteria;p__Bacteroidota;c__Bacteroidia;o__Cytophagales;f__Microscillaceae;g__Ohtaekwangia;s__	7	0	1	0	2	2	0	0	0	1	1	0	0	0	0	0	0	1	2	1	8	4	14	37	k__Bacteria;p__Bacteroidota;c__Bacteroidia;o__Cytophagales;f__Microscillaceae;g__Ohtaekwangia;s__
OTU_1125	1	4	13	0	0	3	6	0	k__Bacteria;p__Firmicutes;c__Clostridia;o__Peptostreptococcales-Tissierellales;f__Sedimentibacteraceae;g__Sedimentibacter;s__	0	1	0	0	0	10	37	0	0	0	0	0	0	0	0	0	8	0	17	0	0	0	0	0	k__Bacteria;p__Firmicutes;c__Clostridia;o__Peptostreptococcales-Tissierellales;f__Sedimentibacteraceae;g__Sedimentibacter;s__
OTU_1126	2	0	0	27	1	0	0	0	k__Bacteria;p__Firmicutes;c__Clostridia;o__Lachnospirales;f__Lachnospiraceae;g__Anaerostignum;s__	3	3	0	0	0	0	0	0	0	80	0	0	0	2	0	0	0	0	0	0	0	0	0	0	k__Bacteria;p__Firmicutes;c__Clostridia;o__Lachnospirales;f__Lachnospiraceae;g__Anaerostignum;s__
OTU_1127	23	3	1	4	9	2	2	102	k__Bacteria;p__Proteobacteria;c__Gammaproteobacteria;o__Pseudomonadales;f__Pseudomonadaceae;g__Pseudomonas;s__Pseudomonas_peli	27	5	37	1	4	3	1	0	1	6	4	1	23	0	2	3	0	3	0	2	3	290	4	12	k__Bacteria;p__Proteobacteria;c__Gammaproteobacteria;o__Pseudomonadales;f__Pseudomonadaceae;g__Pseudomonas;s__Pseudomonas_peli
OTU_1128	0	0	0	0	0	0	0	18	k__Bacteria;p__Acidobacteriota;c__Vicinamibacteria;o__Vicinamibacterales;f__;g__;s__	0	0	0	0	0	0	0	0	0	0	0	0	0	0	0	0	0	0	0	0	0	52	0	0	k__Bacteria;p__Acidobacteriota;c__Vicinamibacteria;o__Vicinamibacterales;f__;g__;s__
OTU_1129	0	0	0	14	0	0	0	0	k__Bacteria;p__Firmicutes;c__Bacilli;o__Bacillales;f__Planococcaceae;g__Savagea;s__	0	0	0	0	0	0	0	0	0	40	0	0	0	0	0	0	0	0	0	0	0	0	0	0	k__Bacteria;p__Firmicutes;c__Bacilli;o__Bacillales;f__Planococcaceae;g__Savagea;s__
OTU_1130	0	0	0	1	0	0	0	0	k__Bacteria	0	0	0	0	0	0	0	0	0	0	1	0	0	0	0	0	0	0	0	0	0	0	0	0	k__Bacteria
OTU_1131	0	0	1	0	0	0	16	1	k__Bacteria;p__Verrucomicrobiota;c__Verrucomicrobiae;o__Pedosphaerales;f__Pedosphaeraceae;g__Pedosphaeraceae;s__	0	0	0	0	0	0	0	0	3	0	0	0	0	0	0	0	0	0	1	0	46	0	1	1	k__Bacteria;p__Verrucomicrobiota;c__Verrucomicrobiae;o__Pedosphaerales;f__Pedosphaeraceae;g__Pedosphaeraceae;s__
OTU_1132	4	12	0	1	0	1	1	2	k__Bacteria;p__Proteobacteria;c__Alphaproteobacteria;o__Acetobacterales;f__Acetobacteraceae;g__Roseomonas;s__groundwater_biofilm	6	0	6	1	27	8	0	0	0	1	2	0	0	0	0	1	0	1	0	0	2	0	1	3	k__Bacteria;p__Proteobacteria;c__Alphaproteobacteria;o__Acetobacterales;f__Acetobacteraceae;g__Roseomonas;s__groundwater_biofilm
OTU_1133	1	9	1	1	1	1	9	16	k__Bacteria;p__Planctomycetota;c__Planctomycetes;o__Pirellulales;f__Pirellulaceae;g__Pirellula;s__	3	0	0	22	1	2	2	0	0	1	1	0	0	0	1	0	0	2	10	9	7	6	28	14	k__Bacteria;p__Planctomycetota;c__Planctomycetes;o__Pirellulales;f__Pirellulaceae;g__Pirellula;s__
OTU_1134	1	0	0	2	0	1	2	12	k__Bacteria;p__Proteobacteria;c__Gammaproteobacteria	1	0	0	0	0	0	0	0	0	4	0	0	0	0	0	0	0	1	3	0	1	0	30	5	k__Bacteria;p__Proteobacteria;c__Gammaproteobacteria
OTU_1135	0	1	0	0	0	0	1	12	k__Bacteria;p__Planctomycetota;c__Phycisphaerae;o__Tepidisphaerales;f__WD2101_soil_group;g__WD2101_soil_group;s__	0	0	0	0	3	0	0	0	0	0	0	0	0	0	0	0	0	0	0	1	1	0	28	7	k__Bacteria;p__Planctomycetota;c__Phycisphaerae;o__Tepidisphaerales;f__WD2101_soil_group;g__WD2101_soil_group;s__
OTU_1136	0	1	0	0	19	0	0	0	k__Bacteria	0	0	0	1	0	0	0	0	0	0	0	0	0	0	56	0	0	0	0	0	0	0	0	0	k__Bacteria
OTU_1137	3	1	1	1	0	1	2	14	k__Bacteria;p__Chloroflexi;c__Anaerolineae;o__SBR1031;f__A4b;g__A4b;s__	7	1	0	0	0	2	0	0	3	0	1	0	0	0	0	1	1	0	1	1	4	0	8	32	k__Bacteria;p__Chloroflexi;c__Anaerolineae;o__SBR1031;f__A4b;g__A4b;s__
OTU_1138	1	1	0	1	1	0	1	18	k__Bacteria;p__Chloroflexi;c__Chloroflexia;o__Chloroflexales;f__Chloroflexaceae	0	0	2	0	0	1	0	0	0	0	1	0	0	1	0	0	0	0	0	0	1	0	28	25	k__Bacteria;p__Chloroflexi;c__Chloroflexia;o__Chloroflexales;f__Chloroflexaceae
OTU_1139	7	0	1	0	2	1	2	0	k__Bacteria;p__Chloroflexi;c__Chloroflexia;o__Chloroflexales;f__Chloroflexaceae	1	0	19	0	0	0	0	0	3	0	0	0	4	0	0	0	0	1	0	0	6	0	0	0	k__Bacteria;p__Chloroflexi;c__Chloroflexia;o__Chloroflexales;f__Chloroflexaceae
OTU_1140	1	0	0	1	0	0	1	16	k__Bacteria;p__Planctomycetota;c__Planctomycetes;o__Pirellulales;f__Pirellulaceae;g__Rhodopirellula	1	0	0	0	0	0	0	0	0	1	0	0	0	0	0	0	0	0	0	1	1	0	35	11	k__Bacteria;p__Planctomycetota;c__Planctomycetes;o__Pirellulales;f__Pirellulaceae;g__Rhodopirellula
OTU_1141	4	3	3	2	3	1	2	87	k__Bacteria;p__Proteobacteria;c__Alphaproteobacteria;o__Rhizobiales;f__Xanthobacteraceae	0	0	10	5	0	3	2	3	2	0	1	5	6	1	1	2	1	0	4	1	1	254	1	6	k__Bacteria;p__Proteobacteria;c__Alphaproteobacteria;o__Rhizobiales;f__Xanthobacteraceae
OTU_1142	1	0	0	4	1	1	3	11	k__Bacteria;p__Myxococcota;c__Polyangia;o__Blfdi19;f__Blfdi19;g__Blfdi19;s__	3	0	0	0	0	0	0	0	0	3	7	0	1	0	0	0	0	2	5	2	0	0	6	25	k__Bacteria;p__Myxococcota;c__Polyangia;o__Blfdi19;f__Blfdi19;g__Blfdi19;s__
OTU_1143	3	11	0	0	2	0	0	0	k__Bacteria;p__Bdellovibrionota;c__Bdellovibrionia;o__Bacteriovoracales;f__Bacteriovoracaceae;g__Peredibacter	3	3	2	31	0	2	0	0	0	0	0	0	0	0	5	0	0	0	0	0	0	0	0	0	k__Bacteria;p__Bdellovibrionota;c__Bdellovibrionia;o__Bacteriovoracales;f__Bacteriovoracaceae;g__Peredibacter
OTU_1144	3	0	8	18	2	8	0	4	k__Bacteria;p__Firmicutes;c__Bacilli;o__Erysipelotrichales;f__Erysipelotrichaceae;g__Turicibacter;s__	2	0	5	0	0	0	9	9	4	41	6	5	3	1	1	5	10	7	0	0	0	0	8	4	k__Bacteria;p__Firmicutes;c__Bacilli;o__Erysipelotrichales;f__Erysipelotrichaceae;g__Turicibacter;s__
OTU_1145	0	0	7	0	0	0	5	0	k__Bacteria;p__Desulfobacterota;c__Syntrophia;o__Syntrophales;f__;g__;s__	0	0	0	0	0	0	21	0	0	0	0	0	0	0	0	0	0	0	14	0	0	0	0	0	k__Bacteria;p__Desulfobacterota;c__Syntrophia;o__Syntrophales;f__;g__;s__
OTU_1146	0	0	1	0	0	0	17	2	k__Bacteria;p__Planctomycetota;c__Planctomycetes;o__Gemmatales;f__Gemmataceae;g__;s__	0	0	0	0	0	0	0	0	3	0	0	0	0	0	0	0	0	0	10	0	39	2	1	2	k__Bacteria;p__Planctomycetota;c__Planctomycetes;o__Gemmatales;f__Gemmataceae;g__;s__
OTU_1147	2	2	4	1	2	5	0	5	k__Bacteria;p__Proteobacteria;c__Alphaproteobacteria;o__Acetobacterales;f__Acetobacteraceae;g__Craurococcus-Caldovatus	2	0	2	1	3	1	6	3	1	2	0	0	2	0	3	3	3	7	0	0	0	13	1	1	k__Bacteria;p__Proteobacteria;c__Alphaproteobacteria;o__Acetobacterales;f__Acetobacteraceae;g__Craurococcus-Caldovatus
OTU_1148	19	27	10	11	10	6	27	13	k__Bacteria;p__Firmicutes;c__Clostridia;o__Clostridiales;f__Clostridiaceae;g__Clostridium_sensu_stricto_1	25	10	22	51	1	28	9	9	12	21	9	2	14	0	16	0	5	11	17	11	52	21	5	11	k__Bacteria;p__Firmicutes;c__Clostridia;o__Clostridiales;f__Clostridiaceae;g__Clostridium_sensu_stricto_1
OTU_1149	0	0	0	0	13	0	0	0	k__Bacteria	0	0	0	0	0	0	0	0	0	0	0	0	0	0	38	0	0	0	0	0	0	0	0	0	k__Bacteria
OTU_1150	0	0	4	1	0	0	15	15	k__Bacteria;p__Proteobacteria;c__Alphaproteobacteria;o__Rhizobiales;f__A0839;g__A0839;s__	0	0	0	0	0	0	0	5	5	0	0	1	0	0	0	0	0	0	3	4	36	42	0	3	k__Bacteria;p__Proteobacteria;c__Alphaproteobacteria;o__Rhizobiales;f__A0839;g__A0839;s__
OTU_1151	3	0	0	6	3	0	0	1	k__Bacteria;p__Bacteroidota;c__Bacteroidia;o__Bacteroidales;f__Muribaculaceae;g__Muribaculaceae;s__	2	2	5	0	0	0	0	0	0	16	0	2	3	1	3	0	0	0	0	0	0	0	0	2	k__Bacteria;p__Bacteroidota;c__Bacteroidia;o__Bacteroidales;f__Muribaculaceae;g__Muribaculaceae;s__
OTU_1152	0	0	0	0	0	0	0	20	k__Bacteria;p__Bacteroidota;c__Bacteroidia;o__Cytophagales;f__Microscillaceae;g__Ohtaekwangia;s__	0	0	0	0	0	0	0	0	0	0	0	0	0	0	0	0	0	0	0	0	0	59	0	0	k__Bacteria;p__Bacteroidota;c__Bacteroidia;o__Cytophagales;f__Microscillaceae;g__Ohtaekwangia;s__
OTU_1153	1	1	1	0	0	0	1	1	k__Bacteria;p__Bacteroidota;c__Bacteroidia;o__Cytophagales;f__Cytophagaceae;g__Sporocytophaga;s__	1	2	0	1	0	1	0	0	2	0	0	0	0	0	0	0	0	0	0	0	1	0	1	1	k__Bacteria;p__Bacteroidota;c__Bacteroidia;o__Cytophagales;f__Cytophagaceae;g__Sporocytophaga;s__
OTU_1154	0	0	2	1	0	0	10	17	k__Bacteria;p__Acidobacteriota;c__Vicinamibacteria;o__Vicinamibacterales;f__Vicinamibacteraceae;g__Vicinamibacteraceae;s__	0	0	0	0	0	0	2	0	3	1	0	0	0	0	0	0	0	0	21	1	7	47	0	3	k__Bacteria;p__Acidobacteriota;c__Vicinamibacteria;o__Vicinamibacterales;f__Vicinamibacteraceae;g__Vicinamibacteraceae;s__
OTU_1155	3	1	5	0	2	0	15	7	k__Bacteria;p__Proteobacteria;c__Gammaproteobacteria;o__Burkholderiales;f__Nitrosomonadaceae;g__Ellin6067;s__	1	0	8	0	1	0	1	0	14	0	0	0	4	0	0	0	0	0	3	1	40	11	4	5	k__Bacteria;p__Proteobacteria;c__Gammaproteobacteria;o__Burkholderiales;f__Nitrosomonadaceae;g__Ellin6067;s__
OTU_1156	2	15	1	0	1	0	2	0	k__Bacteria	2	3	0	40	1	2	1	0	0	0	0	0	0	0	2	0	0	0	4	0	0	0	0	0	k__Bacteria
OTU_1157	0	0	0	5	0	0	0	0	Unknown	0	0	0	0	0	0	0	0	0	4	7	4	0	0	0	0	0	0	0	0	0	0	0	0	Unknown
OTU_1158	3	2	1	1	0	1	13	5	k__Bacteria;p__Bacteroidota;c__Bacteroidia;o__Chitinophagales;f__Chitinophagaceae;g__Edaphobaculum;s__	4	2	3	1	3	0	0	1	0	1	1	0	0	0	0	0	0	1	3	27	8	0	3	10	k__Bacteria;p__Bacteroidota;c__Bacteroidia;o__Chitinophagales;f__Chitinophagaceae;g__Edaphobaculum;s__
OTU_1159	2	1	0	1	0	0	1	6	k__Bacteria;p__Planctomycetota;c__Phycisphaerae;o__Phycisphaerales;f__Phycisphaeraceae;g__CL500-3;s__	5	0	0	0	0	3	0	0	0	0	2	0	0	0	0	0	0	0	0	2	0	0	2	15	k__Bacteria;p__Planctomycetota;c__Phycisphaerae;o__Phycisphaerales;f__Phycisphaeraceae;g__CL500-3;s__
OTU_1160	0	0	0	13	0	0	0	0	k__Bacteria;p__Firmicutes;c__Clostridia;o__Oscillospirales;f__Ruminococcaceae;g__Pygmaiobacter;s__Pygmaiobacter_massiliensis	0	0	0	0	0	0	0	0	0	39	0	0	0	0	0	0	0	0	0	0	0	0	0	0	k__Bacteria;p__Firmicutes;c__Clostridia;o__Oscillospirales;f__Ruminococcaceae;g__Pygmaiobacter;s__Pygmaiobacter_massiliensis
OTU_1161	64	309	49	8	75	13	150	81	k__Bacteria;p__Proteobacteria;c__Alphaproteobacteria;o__Rhodobacterales;f__Rhodobacteraceae;g__Defluviimonas;s__	114	45	33	841	31	54	76	53	16	2	20	0	1	4	219	4	4	31	186	226	38	164	23	56	k__Bacteria;p__Proteobacteria;c__Alphaproteobacteria;o__Rhodobacterales;f__Rhodobacteraceae;g__Defluviimonas;s__
OTU_1162	0	0	2	0	0	0	12	1	k__Bacteria;p__Verrucomicrobiota;c__Chlamydiae;o__Chlamydiales;f__cvE6;g__cvE6;s__	0	0	0	0	0	0	0	0	5	0	0	0	0	0	0	0	0	0	0	1	35	0	1	0	k__Bacteria;p__Verrucomicrobiota;c__Chlamydiae;o__Chlamydiales;f__cvE6;g__cvE6;s__
OTU_1163	6	0	1	25	11	0	0	1	k__Bacteria;p__Firmicutes;c__Clostridia;o__Oscillospirales;f__Oscillospiraceae;g__Colidextribacter;s__	0	0	16	0	0	0	0	0	1	74	0	0	32	0	0	0	0	0	0	0	0	1	0	0	k__Bacteria;p__Firmicutes;c__Clostridia;o__Oscillospirales;f__Oscillospiraceae;g__Colidextribacter;s__
OTU_1164	0	0	2	0	0	0	13	1	k__Bacteria;p__Actinobacteriota;c__Acidimicrobiia	0	0	0	0	0	0	0	0	5	0	0	0	0	0	0	0	0	0	0	2	37	0	1	0	k__Bacteria;p__Actinobacteriota;c__Acidimicrobiia
OTU_1165	0	0	2	10	0	0	0	0	Unknown	0	0	0	0	0	0	2	4	0	27	3	0	0	0	0	0	0	0	0	0	0	0	0	0	Unknown
OTU_1166	0	0	5	0	0	2	9	1	k__Bacteria;p__Myxococcota;c__Polyangia;o__Polyangiales;f__Sandaracinaceae;g__;s__	0	0	0	0	0	0	0	14	1	0	0	0	0	0	0	0	0	6	0	22	3	0	0	2	k__Bacteria;p__Myxococcota;c__Polyangia;o__Polyangiales;f__Sandaracinaceae;g__;s__
OTU_1167	7	0	2	23	11	1	0	1	k__Bacteria;p__Firmicutes;c__Clostridia;o__Oscillospirales;f__Oscillospiraceae;g__Flavonifractor;s__	0	0	20	0	0	0	4	0	1	67	0	1	31	0	2	1	0	0	0	0	0	0	2	0	k__Bacteria;p__Firmicutes;c__Clostridia;o__Oscillospirales;f__Oscillospiraceae;g__Flavonifractor;s__
OTU_1168	0	0	3	0	0	1	17	1	k__Bacteria;p__Bacteroidota;c__Bacteroidia;o__Flavobacteriales;f__NS9_marine_group;g__NS9_marine_group;s__Bacteroidetes_bacterium	0	0	0	0	0	0	0	0	9	0	0	0	0	0	0	0	0	2	5	0	45	0	1	0	k__Bacteria;p__Bacteroidota;c__Bacteroidia;o__Flavobacteriales;f__NS9_marine_group;g__NS9_marine_group;s__Bacteroidetes_bacterium
OTU_1169	0	0	0	15	0	0	0	0	k__Bacteria;p__Firmicutes;c__Clostridia;o__Lachnospirales;f__Lachnospiraceae	0	0	0	0	0	0	0	0	0	45	0	0	0	0	0	0	0	0	0	0	0	0	0	0	k__Bacteria;p__Firmicutes;c__Clostridia;o__Lachnospirales;f__Lachnospiraceae
OTU_1170	22	0	2	0	1	0	0	0	Unknown	3	14	48	0	0	0	0	2	2	0	0	0	1	0	0	0	0	0	0	0	0	0	0	0	Unknown
OTU_1171	0	0	1	0	0	1	10	1	k__Bacteria;p__Proteobacteria;c__Gammaproteobacteria;o__Burkholderiales;f__Nitrosomonadaceae	0	0	0	0	0	0	0	0	2	0	0	0	0	0	0	0	0	2	1	2	27	0	0	2	k__Bacteria;p__Proteobacteria;c__Gammaproteobacteria;o__Burkholderiales;f__Nitrosomonadaceae
OTU_1172	0	0	2	0	0	0	13	1	k__Bacteria;p__Patescibacteria;c__Saccharimonadia;o__Saccharimonadales;f__LWQ8;g__LWQ8;s__	0	0	0	0	0	0	0	0	4	0	0	0	0	0	0	0	0	0	10	7	20	0	1	0	k__Bacteria;p__Patescibacteria;c__Saccharimonadia;o__Saccharimonadales;f__LWQ8;g__LWQ8;s__
OTU_1173	0	0	6	0	0	1	29	4	k__Bacteria;p__Proteobacteria;c__Gammaproteobacteria;o__Burkholderiales;f__B1-7BS;g__B1-7BS;s__	0	0	0	0	0	0	5	0	11	0	0	0	0	0	0	0	0	3	23	4	59	0	0	11	k__Bacteria;p__Proteobacteria;c__Gammaproteobacteria;o__Burkholderiales;f__B1-7BS;g__B1-7BS;s__
OTU_1174	2	2	1	0	2	2	0	0	k__Bacteria;p__Firmicutes;c__Clostridia;o__Christensenellales;f__Christensenellaceae;g__Christensenellaceae_R-7_group	1	1	3	1	1	3	2	0	0	0	0	0	0	5	0	1	3	0	0	0	0	0	0	0	k__Bacteria;p__Firmicutes;c__Clostridia;o__Christensenellales;f__Christensenellaceae;g__Christensenellaceae_R-7_group
OTU_1175	1	0	3	2	0	0	8	2	k__Bacteria;p__Proteobacteria;c__Alphaproteobacteria;o__Reyranellales;f__Reyranellaceae;g__Reyranella;s__	1	0	0	0	0	0	2	0	6	0	4	0	0	0	0	0	0	0	8	0	16	0	1	4	k__Bacteria;p__Proteobacteria;c__Alphaproteobacteria;o__Reyranellales;f__Reyranellaceae;g__Reyranella;s__
OTU_1176	0	0	0	0	0	0	9	0	k__Bacteria;p__Planctomycetota;c__Planctomycetes;o__Isosphaerales;f__Isosphaeraceae;g__Singulisphaera	0	0	0	0	0	0	0	0	0	0	0	0	0	0	0	0	0	0	0	0	25	0	0	0	k__Bacteria;p__Planctomycetota;c__Planctomycetes;o__Isosphaerales;f__Isosphaeraceae;g__Singulisphaera
OTU_1177	0	1	11	0	0	0	4	0	k__Bacteria;p__Firmicutes;c__Syntrophomonadia;o__Syntrophomonadales;f__Syntrophomonadaceae;g__Syntrophomonas	0	0	0	0	0	3	33	0	0	0	0	0	0	0	0	0	0	0	11	0	0	0	0	0	k__Bacteria;p__Firmicutes;c__Syntrophomonadia;o__Syntrophomonadales;f__Syntrophomonadaceae;g__Syntrophomonas
OTU_1178	0	0	1	11	0	0	0	0	Unknown	0	0	0	0	0	0	0	0	2	27	4	0	0	0	0	0	0	0	0	0	0	0	0	0	Unknown
OTU_1179	0	0	4	0	0	0	9	2	k__Bacteria;p__Actinobacteriota;c__Thermoleophilia;o__Gaiellales;f__;g__	0	0	0	0	0	0	1	0	10	0	0	0	0	0	0	0	0	0	0	3	22	2	0	4	k__Bacteria;p__Actinobacteriota;c__Thermoleophilia;o__Gaiellales;f__;g__
OTU_1180	0	0	2	0	0	0	10	3	k__Bacteria;p__Proteobacteria;c__Alphaproteobacteria;o__Caulobacterales;f__Caulobacteraceae;g__;s__	0	0	0	0	0	0	0	0	5	0	0	0	0	0	0	0	0	0	2	0	26	1	2	4	k__Bacteria;p__Proteobacteria;c__Alphaproteobacteria;o__Caulobacterales;f__Caulobacteraceae;g__;s__
OTU_1181	0	0	1	1	0	1	18	2	k__Bacteria;p__Proteobacteria;c__Gammaproteobacteria;o__Burkholderiales;f__Comamonadaceae	0	0	0	0	0	0	0	0	2	0	1	0	0	0	0	0	0	2	2	1	49	0	2	2	k__Bacteria;p__Proteobacteria;c__Gammaproteobacteria;o__Burkholderiales;f__Comamonadaceae
OTU_1182	4	0	3	4	0	0	0	0	Unknown	2	1	9	0	0	0	0	0	9	10	0	0	0	0	0	0	0	0	0	0	0	0	0	0	Unknown
OTU_1183	0	0	0	12	0	0	0	0	Unknown	0	0	0	0	0	0	0	0	0	34	0	0	0	0	0	0	0	0	0	0	0	0	0	0	Unknown
OTU_1184	0	0	4	0	0	1	14	0	k__Bacteria;p__Bdellovibrionota	0	0	0	0	0	0	0	11	0	0	0	0	0	0	0	0	0	1	1	40	1	0	0	0	k__Bacteria;p__Bdellovibrionota
OTU_1185	1	3	1	0	2	1	3	2	k__Bacteria;p__Actinobacteriota;c__Acidimicrobiia;o__Microtrichales;f__Microtrichaceae;g__;s__	1	0	2	8	0	0	0	0	3	0	0	0	0	0	4	0	0	3	2	0	7	2	1	1	k__Bacteria;p__Actinobacteriota;c__Acidimicrobiia;o__Microtrichales;f__Microtrichaceae;g__;s__
OTU_1186	0	0	0	0	0	0	1	23	k__Bacteria;p__Acidobacteriota;c__Acidobacteriae;o__Bryobacterales;f__Bryobacteraceae;g__Bryobacter;s__	0	0	0	0	0	0	0	0	0	0	0	0	0	0	0	0	0	0	3	0	0	67	0	2	k__Bacteria;p__Acidobacteriota;c__Acidobacteriae;o__Bryobacterales;f__Bryobacteraceae;g__Bryobacter;s__
OTU_1187	0	0	0	0	0	0	12	2	k__Bacteria;p__Planctomycetota;c__Phycisphaerae;o__Phycisphaerales;f__Phycisphaeraceae;g__;s__	0	0	0	0	0	0	0	0	0	0	0	0	0	0	0	0	0	0	1	30	3	0	1	3	k__Bacteria;p__Planctomycetota;c__Phycisphaerae;o__Phycisphaerales;f__Phycisphaeraceae;g__;s__
OTU_1188	0	3	0	0	10	15	0	0	Unknown	0	0	0	0	9	0	0	0	0	0	0	0	25	3	0	10	31	4	0	0	0	0	0	0	Unknown
OTU_1189	0	0	2	0	0	0	9	1	k__Bacteria;p__Proteobacteria;c__Gammaproteobacteria;o__Burkholderiales;f__SC-I-84;g__SC-I-84;s__	0	0	0	0	0	0	0	1	3	0	0	0	0	0	0	0	0	0	2	0	23	0	0	2	k__Bacteria;p__Proteobacteria;c__Gammaproteobacteria;o__Burkholderiales;f__SC-I-84;g__SC-I-84;s__
OTU_1190	1	1	0	0	1	1	0	11	k__Bacteria;p__Firmicutes;c__Clostridia	2	0	0	1	0	0	0	0	0	0	0	0	0	0	1	0	1	0	0	0	0	33	0	0	k__Bacteria;p__Firmicutes;c__Clostridia
OTU_1191	0	0	0	1	0	0	0	0	Unknown	0	0	0	0	0	0	0	0	0	3	0	0	0	0	0	0	0	0	0	0	0	0	0	0	Unknown
OTU_1192	0	0	3	0	0	0	11	6	k__Bacteria;p__Myxococcota;c__Polyangia;o__Polyangiales;f__BIrii41;g__BIrii41	0	0	0	0	0	0	1	0	7	0	0	0	0	0	0	0	0	0	0	1	32	15	0	1	k__Bacteria;p__Myxococcota;c__Polyangia;o__Polyangiales;f__BIrii41;g__BIrii41
OTU_1194	0	7	0	0	0	13	0	0	k__Bacteria;p__Firmicutes;c__Bacilli;o__Erysipelotrichales;f__Erysipelatoclostridiaceae;g__UCG-004;s__Tenericutes_bacterium	0	0	0	0	0	20	0	0	0	0	0	0	0	0	0	0	37	0	0	0	0	0	0	0	k__Bacteria;p__Firmicutes;c__Bacilli;o__Erysipelotrichales;f__Erysipelatoclostridiaceae;g__UCG-004;s__Tenericutes_bacterium
OTU_1195	2	6	0	1	0	2	1	12	k__Bacteria;p__Bacteroidota;c__Bacteroidia;o__Bacteroidales;f__Paludibacteraceae;g__Paludibacter;s__	4	0	0	1	15	1	0	0	0	3	0	0	0	0	0	4	0	0	2	0	0	0	26	9	k__Bacteria;p__Bacteroidota;c__Bacteroidia;o__Bacteroidales;f__Paludibacteraceae;g__Paludibacter;s__
OTU_1196	0	0	2	1	0	1	0	0	k__Bacteria;p__Bacteroidota;c__Bacteroidia;o__Sphingobacteriales;f__Sphingobacteriaceae;g__Pedobacter;s__Nubsella_sp.	0	0	0	0	0	0	5	1	0	0	1	0	0	0	0	0	1	2	0	0	0	0	0	0	k__Bacteria;p__Bacteroidota;c__Bacteroidia;o__Sphingobacteriales;f__Sphingobacteriaceae;g__Pedobacter;s__Nubsella_sp.
OTU_1198	3	0	0	1	6	2	0	0	k__Bacteria;p__Firmicutes;c__Clostridia;o__Lachnospirales;f__Lachnospiraceae;g__Coprococcus;s__Coprococcus_eutactus	0	0	9	0	0	0	0	0	0	1	0	0	17	0	0	0	0	5	0	0	0	0	0	0	k__Bacteria;p__Firmicutes;c__Clostridia;o__Lachnospirales;f__Lachnospiraceae;g__Coprococcus;s__Coprococcus_eutactus
OTU_1199	7	0	0	5	0	0	0	0	k__Bacteria;p__Proteobacteria;c__Gammaproteobacteria;o__Burkholderiales;f__Oxalobacteraceae;g__Oxalobacter;s__	0	19	0	0	0	0	0	0	0	0	0	13	0	0	0	0	0	0	0	0	0	0	0	0	k__Bacteria;p__Proteobacteria;c__Gammaproteobacteria;o__Burkholderiales;f__Oxalobacteraceae;g__Oxalobacter;s__
OTU_1200	0	0	0	16	0	0	0	0	Unknown	0	0	0	0	0	0	0	0	0	46	0	0	0	0	0	0	0	0	0	0	0	0	0	0	Unknown
OTU_1201	0	1	16	1	0	3	6	0	k__Bacteria;p__Firmicutes;c__Clostridia;o__Peptostreptococcales-Tissierellales;f__Sedimentibacteraceae;g__Sedimentibacter;s__	0	0	0	0	0	1	47	0	0	0	0	1	0	0	0	0	9	0	17	0	0	0	0	0	k__Bacteria;p__Firmicutes;c__Clostridia;o__Peptostreptococcales-Tissierellales;f__Sedimentibacteraceae;g__Sedimentibacter;s__
OTU_1202	0	0	0	0	3	6	0	0	Unknown	0	0	0	0	0	0	0	0	0	0	0	0	9	0	0	4	12	0	0	0	0	0	0	0	Unknown
OTU_1203	0	0	5	0	0	0	11	1	k__Bacteria;p__Proteobacteria;c__Gammaproteobacteria;o__Burkholderiales;f__Rhodocyclaceae;g__Sulfuritalea;s__	0	0	0	0	0	0	13	0	0	0	0	0	0	0	0	0	0	0	30	0	1	0	0	3	k__Bacteria;p__Proteobacteria;c__Gammaproteobacteria;o__Burkholderiales;f__Rhodocyclaceae;g__Sulfuritalea;s__
OTU_1204	0	5	0	0	0	4	0	0	Unknown	0	0	0	0	0	13	0	0	0	0	0	0	0	0	0	0	0	11	0	0	0	0	0	0	Unknown
OTU_1205	1	12	0	0	1	0	0	0	k__Bacteria	1	0	0	35	0	0	0	0	0	0	0	0	0	0	1	0	0	0	0	0	0	0	0	0	k__Bacteria
OTU_1206	1	1	1	0	0	2	7	6	k__Bacteria;p__Chloroflexi;c__Chloroflexia;o__Thermomicrobiales;f__JG30-KF-CM45;g__JG30-KF-CM45;s__	1	1	0	1	0	0	0	2	0	0	0	0	0	0	0	0	0	4	0	12	8	13	1	2	k__Bacteria;p__Chloroflexi;c__Chloroflexia;o__Thermomicrobiales;f__JG30-KF-CM45;g__JG30-KF-CM45;s__
OTU_1207	0	0	0	28	0	0	0	0	k__Bacteria;p__Bacteroidota;c__Bacteroidia;o__Bacteroidales;f__Muribaculaceae;g__Muribaculaceae;s__	0	0	0	0	0	0	0	0	0	82	0	0	0	0	0	0	0	0	0	0	0	0	0	0	k__Bacteria;p__Bacteroidota;c__Bacteroidia;o__Bacteroidales;f__Muribaculaceae;g__Muribaculaceae;s__
OTU_1208	0	0	11	0	0	1	57	3	k__Bacteria;p__Myxococcota;c__Polyangia;o__Polyangiales;f__Sandaracinaceae;g__;s__	0	0	0	0	0	0	33	0	0	0	0	0	0	0	0	0	0	3	159	2	9	3	4	2	k__Bacteria;p__Myxococcota;c__Polyangia;o__Polyangiales;f__Sandaracinaceae;g__;s__
OTU_1209	0	0	0	0	0	11	0	0	Unknown	0	0	0	0	0	0	0	0	0	0	0	0	0	0	0	0	0	31	0	0	0	0	0	0	Unknown
OTU_1210	0	0	0	0	0	0	0	15	k__Bacteria;p__Gemmatimonadota;c__Gemmatimonadetes;o__Gemmatimonadales;f__Gemmatimonadaceae;g__;s__	0	0	0	0	0	0	0	0	0	0	0	0	0	0	0	0	0	0	0	0	0	45	0	0	k__Bacteria;p__Gemmatimonadota;c__Gemmatimonadetes;o__Gemmatimonadales;f__Gemmatimonadaceae;g__;s__
OTU_1211	4	5	0	4	0	9	0	0	k__Bacteria;p__Firmicutes;c__Limnochordia;o__M55-D21;f__M55-D21;g__M55-D21	0	11	0	0	0	13	0	0	0	0	0	10	0	0	0	0	25	0	0	0	0	0	0	0	k__Bacteria;p__Firmicutes;c__Limnochordia;o__M55-D21;f__M55-D21;g__M55-D21
OTU_1212	0	21	0	0	0	1	0	0	Unknown	0	0	0	14	49	0	0	0	0	0	0	0	0	0	0	3	0	0	0	0	0	0	0	0	Unknown
OTU_1213	2	5	6	1	3	0	22	2	k__Bacteria;p__Proteobacteria;c__Gammaproteobacteria;o__Burkholderiales;f__TRA3-20;g__TRA3-20;s__	2	2	0	13	0	1	9	0	9	0	1	0	0	0	7	0	0	0	23	2	39	1	0	5	k__Bacteria;p__Proteobacteria;c__Gammaproteobacteria;o__Burkholderiales;f__TRA3-20;g__TRA3-20;s__
OTU_1214	0	1	10	0	0	1	2	0	k__Bacteria;p__Firmicutes;c__Syntrophomonadia;o__Syntrophomonadales;f__Syntrophomonadaceae;g__Syntrophomonas;s__Syntrophomonas_wolfei	0	0	0	0	0	1	28	0	0	0	0	0	0	0	0	0	1	0	4	0	0	0	0	0	k__Bacteria;p__Firmicutes;c__Syntrophomonadia;o__Syntrophomonadales;f__Syntrophomonadaceae;g__Syntrophomonas;s__Syntrophomonas_wolfei
OTU_1215	0	0	0	19	0	0	0	0	k__Bacteria	0	0	0	0	0	0	0	0	0	55	0	0	0	0	0	0	0	0	0	0	0	0	0	0	k__Bacteria
OTU_1216	0	0	4	0	0	0	9	0	k__Bacteria;p__Actinobacteriota;c__Actinobacteria;o__Frankiales;f__Sporichthyaceae;g__hgcI_clade;s__Candidatus_Nanopelagicus	0	0	0	0	0	0	0	12	0	0	0	0	0	0	0	0	0	0	5	19	2	0	0	0	k__Bacteria;p__Actinobacteriota;c__Actinobacteria;o__Frankiales;f__Sporichthyaceae;g__hgcI_clade;s__Candidatus_Nanopelagicus
OTU_1217	9	1	0	0	5	1	1	0	k__Bacteria;p__Proteobacteria;c__Gammaproteobacteria;o__Pseudomonadales;f__Moraxellaceae;g__Acinetobacter;s__Acinetobacter_ursingii	5	0	22	3	0	0	0	0	0	0	0	0	15	0	0	1	1	0	0	0	1	0	0	0	k__Bacteria;p__Proteobacteria;c__Gammaproteobacteria;o__Pseudomonadales;f__Moraxellaceae;g__Acinetobacter;s__Acinetobacter_ursingii
OTU_1218	1	6	2	0	0	1	2	0	k__Bacteria;p__Bacteroidota;c__Bacteroidia;o__Bacteroidales;f__Rikenellaceae;g__;s__	0	3	0	0	0	16	6	0	0	0	0	0	0	0	0	0	3	0	6	0	0	0	0	0	k__Bacteria;p__Bacteroidota;c__Bacteroidia;o__Bacteroidales;f__Rikenellaceae;g__;s__
OTU_1219	3	3	0	1	0	0	1	8	k__Bacteria;p__Bacteroidota;c__Bacteroidia;o__Flavobacteriales;f__Weeksellaceae;g__Cloacibacterium	5	0	4	0	1	7	0	0	0	0	1	0	0	0	0	0	0	0	2	0	0	0	4	20	k__Bacteria;p__Bacteroidota;c__Bacteroidia;o__Flavobacteriales;f__Weeksellaceae;g__Cloacibacterium
OTU_1220	2	2	5	1	3	3	14	2	k__Bacteria;p__Actinobacteriota;c__Actinobacteria;o__Propionibacteriales;f__Nocardioidaceae;g__Aeromicrobium;s__Aeromicrobium_sp.	1	1	3	0	3	2	4	4	6	1	0	0	3	3	1	0	0	8	6	1	35	0	2	4	k__Bacteria;p__Actinobacteriota;c__Actinobacteria;o__Propionibacteriales;f__Nocardioidaceae;g__Aeromicrobium;s__Aeromicrobium_sp.
OTU_1221	0	10	0	0	4	5	0	0	Unknown	0	0	0	0	29	0	0	0	0	0	0	0	0	8	4	0	15	0	0	0	0	0	0	0	Unknown
OTU_1222	0	1	7	0	0	0	4	0	k__Bacteria;p__Firmicutes;c__Incertae_Sedis;o__DTU014;f__DTU014;g__DTU014;s__	0	0	0	0	0	3	21	0	0	0	0	0	0	0	0	0	0	0	11	0	0	0	0	0	k__Bacteria;p__Firmicutes;c__Incertae_Sedis;o__DTU014;f__DTU014;g__DTU014;s__
OTU_1223	0	0	1	0	0	0	17	1	k__Bacteria;p__Verrucomicrobiota;c__Verrucomicrobiae;o__Pedosphaerales;f__Pedosphaeraceae	0	0	0	0	0	0	0	0	1	0	0	0	0	0	0	0	0	0	0	2	48	0	1	0	k__Bacteria;p__Verrucomicrobiota;c__Verrucomicrobiae;o__Pedosphaerales;f__Pedosphaeraceae
OTU_1224	3	0	0	2	0	0	0	0	k__Bacteria	2	0	5	0	0	0	0	0	0	3	1	0	0	0	0	0	0	0	0	0	0	0	0	0	k__Bacteria
OTU_1225	2	4	0	3	0	0	1	32	k__Bacteria;p__Verrucomicrobiota;c__Verrucomicrobiae;o__Verrucomicrobiales;f__Rubritaleaceae;g__Luteolibacter	4	0	0	0	12	0	0	0	0	3	3	2	0	0	0	0	0	0	1	1	1	8	47	39	k__Bacteria;p__Verrucomicrobiota;c__Verrucomicrobiae;o__Verrucomicrobiales;f__Rubritaleaceae;g__Luteolibacter
OTU_1226	6	0	0	0	4	0	0	0	k__Bacteria;p__Proteobacteria;c__Gammaproteobacteria;o__Oceanospirillales;f__Alcanivoracaceae1;g__Alcanivorax;s__Alcanivorax_dieselolei	0	0	17	0	0	0	0	0	0	0	0	0	12	0	0	0	0	0	0	0	0	0	0	0	k__Bacteria;p__Proteobacteria;c__Gammaproteobacteria;o__Oceanospirillales;f__Alcanivoracaceae1;g__Alcanivorax;s__Alcanivorax_dieselolei
OTU_1227	0	0	0	1	0	0	1	14	k__Bacteria;p__Verrucomicrobiota;c__Verrucomicrobiae;o__Opitutales;f__Opitutaceae;g__Lacunisphaera	0	0	0	0	0	0	0	0	0	0	1	0	0	0	0	0	0	0	1	1	0	0	36	5	k__Bacteria;p__Verrucomicrobiota;c__Verrucomicrobiae;o__Opitutales;f__Opitutaceae;g__Lacunisphaera
OTU_1228	5	1	1	0	0	0	19	13	k__Bacteria;p__Proteobacteria;c__Gammaproteobacteria;o__Burkholderiales;f__Comamonadaceae;g__Mitsuaria;s__Burkholderiales_bacterium	6	1	8	0	0	3	1	0	0	0	0	0	0	0	0	0	0	0	12	1	42	1	1	35	k__Bacteria;p__Proteobacteria;c__Gammaproteobacteria;o__Burkholderiales;f__Comamonadaceae;g__Mitsuaria;s__Burkholderiales_bacterium
OTU_1229	0	1	6	0	0	2	2	0	k__Bacteria;p__Firmicutes;c__Clostridia;o__Clostridia;f__Gracilibacteraceae;g__Lutispora;s__	0	0	0	0	0	2	16	0	0	0	0	0	0	0	0	0	4	0	4	0	0	0	0	0	k__Bacteria;p__Firmicutes;c__Clostridia;o__Clostridia;f__Gracilibacteraceae;g__Lutispora;s__
OTU_1230	0	1	1	0	0	1	4	3	k__Bacteria;p__Planctomycetota;c__Planctomycetes;o__Gemmatales;f__Gemmataceae;g__Fimbriiglobus;s__	0	0	0	1	0	0	0	0	2	0	0	0	0	0	0	0	0	1	2	0	8	6	0	1	k__Bacteria;p__Planctomycetota;c__Planctomycetes;o__Gemmatales;f__Gemmataceae;g__Fimbriiglobus;s__
OTU_1231	0	2	0	0	0	0	0	21	k__Bacteria;p__Verrucomicrobiota;c__Verrucomicrobiae;o__Chthoniobacterales;f__Chthoniobacteraceae;g__Chthoniobacter;s__	0	0	0	4	0	0	0	0	0	0	0	0	0	0	0	0	0	0	0	0	0	63	0	0	k__Bacteria;p__Verrucomicrobiota;c__Verrucomicrobiae;o__Chthoniobacterales;f__Chthoniobacteraceae;g__Chthoniobacter;s__
OTU_1232	1	1	13	2	1	8	31	27	k__Bacteria;p__Proteobacteria;c__Alphaproteobacteria;o__Sphingomonadales;f__Sphingomonadaceae;g__Sphingomonas	3	0	0	0	0	1	15	18	5	3	1	0	0	0	1	2	2	19	30	28	34	58	6	15	k__Bacteria;p__Proteobacteria;c__Alphaproteobacteria;o__Sphingomonadales;f__Sphingomonadaceae;g__Sphingomonas
OTU_1233	5	0	4	8	1	0	0	0	Unknown	3	2	9	0	0	0	6	5	1	18	4	1	2	0	0	0	0	0	0	0	0	0	0	0	Unknown
OTU_1234	0	0	1	0	0	0	12	0	k__Bacteria;p__Patescibacteria;c__Saccharimonadia;o__Saccharimonadales	0	0	0	0	0	0	0	0	2	0	0	0	0	0	0	0	0	0	0	0	35	0	0	0	k__Bacteria;p__Patescibacteria;c__Saccharimonadia;o__Saccharimonadales
OTU_1235	1	0	0	1	0	0	2	25	k__Bacteria;p__Acidobacteriota;c__Vicinamibacteria;o__Vicinamibacterales;f__Vicinamibacteraceae;g__Vicinamibacteraceae;s__	2	0	0	0	0	0	0	0	0	0	1	0	0	0	0	0	0	0	0	2	2	67	4	2	k__Bacteria;p__Acidobacteriota;c__Vicinamibacteria;o__Vicinamibacterales;f__Vicinamibacteraceae;g__Vicinamibacteraceae;s__
OTU_1236	0	0	6	0	0	2	3	0	k__Bacteria;p__Firmicutes;c__Clostridia;o__Christensenellales;f__Christensenellaceae;g__Christensenellaceae_R-7_group;s__	0	0	0	0	0	0	16	0	0	0	0	0	0	0	0	0	5	0	7	0	0	0	0	0	k__Bacteria;p__Firmicutes;c__Clostridia;o__Christensenellales;f__Christensenellaceae;g__Christensenellaceae_R-7_group;s__
OTU_1237	0	0	2	0	0	0	12	2	k__Bacteria;p__Myxococcota;c__Polyangia;o__Polyangiales;f__BIrii41;g__BIrii41;s__	0	0	0	0	0	0	0	0	5	0	0	0	0	0	0	0	0	0	5	0	29	1	3	0	k__Bacteria;p__Myxococcota;c__Polyangia;o__Polyangiales;f__BIrii41;g__BIrii41;s__
OTU_1238	3	7	2	1	1	2	4	8	k__Bacteria;p__Actinobacteriota;c__Actinobacteria;o__Propionibacteriales;f__Nocardioidaceae;g__Nocardioides	5	2	1	5	0	15	3	2	1	1	0	0	1	0	1	3	2	1	9	0	1	11	0	12	k__Bacteria;p__Actinobacteriota;c__Actinobacteria;o__Propionibacteriales;f__Nocardioidaceae;g__Nocardioides
OTU_1239	0	0	0	25	0	0	0	0	k__Bacteria;p__Firmicutes;c__Negativicutes;o__Veillonellales-Selenomonadales;f__;g__	0	0	0	0	0	0	0	0	0	75	0	0	0	0	0	0	0	0	0	0	0	0	0	0	k__Bacteria;p__Firmicutes;c__Negativicutes;o__Veillonellales-Selenomonadales;f__;g__
OTU_1240	0	0	0	13	0	0	0	0	k__Bacteria;p__Verrucomicrobiota;c__Omnitrophia;o__Omnitrophales	0	0	0	0	0	0	0	0	0	38	0	0	0	0	0	0	0	0	0	0	0	0	0	0	k__Bacteria;p__Verrucomicrobiota;c__Omnitrophia;o__Omnitrophales
OTU_1241	2	7	0	1	0	3	0	0	k__Bacteria;p__Firmicutes;c__Clostridia;o__Peptostreptococcales-Tissierellales;f__Peptostreptococcales-Tissierellales;g__Tissierella	0	5	0	0	0	19	0	0	0	0	0	3	0	0	0	0	7	0	0	0	0	0	0	0	k__Bacteria;p__Firmicutes;c__Clostridia;o__Peptostreptococcales-Tissierellales;f__Peptostreptococcales-Tissierellales;g__Tissierella
OTU_1242	1	3	0	2	0	0	2	6	k__Bacteria;p__Proteobacteria;c__Alphaproteobacteria	2	0	0	0	7	0	0	0	0	4	2	0	0	0	0	0	0	0	1	1	2	0	8	8	k__Bacteria;p__Proteobacteria;c__Alphaproteobacteria
OTU_1243	0	5	0	0	0	11	0	0	k__Bacteria;p__Firmicutes;c__Clostridia;o__Oscillospirales;f__Ruminococcaceae;g__Ruminococcus	0	0	0	0	0	13	0	0	0	0	0	0	0	0	0	0	31	0	0	0	0	0	0	0	k__Bacteria;p__Firmicutes;c__Clostridia;o__Oscillospirales;f__Ruminococcaceae;g__Ruminococcus
OTU_1244	2	1	0	0	2	0	0	1	k__Bacteria;p__Proteobacteria;c__Gammaproteobacteria;o__EV818SWSAP88;f__EV818SWSAP88;g__EV818SWSAP88;s__	0	3	1	1	0	2	0	0	0	0	0	0	0	5	0	0	0	0	0	0	0	0	0	1	k__Bacteria;p__Proteobacteria;c__Gammaproteobacteria;o__EV818SWSAP88;f__EV818SWSAP88;g__EV818SWSAP88;s__
OTU_1245	3	0	4	9	7	1	0	1	k__Bacteria;p__Firmicutes;c__Bacilli;o__Lactobacillales;f__Lactobacillaceae;g__Lactobacillus;s__Lactobacillus_reuteri	3	1	5	0	0	0	1	8	1	19	7	1	18	2	0	0	3	0	0	0	0	1	0	0	k__Bacteria;p__Firmicutes;c__Bacilli;o__Lactobacillales;f__Lactobacillaceae;g__Lactobacillus;s__Lactobacillus_reuteri
OTU_1246	0	0	0	23	0	0	0	0	k__Bacteria;p__Bacteroidota;c__Bacteroidia;o__Bacteroidales;f__Muribaculaceae;g__Muribaculaceae;s__	0	0	0	0	0	0	0	0	0	68	0	0	0	0	0	0	0	0	0	0	0	0	0	0	k__Bacteria;p__Bacteroidota;c__Bacteroidia;o__Bacteroidales;f__Muribaculaceae;g__Muribaculaceae;s__
OTU_1247	19	0	0	0	2	0	2	1	k__Bacteria;p__Chloroflexi;c__Chloroflexia;o__Chloroflexales;f__Chloroflexaceae;g__Chloronema;s__	2	0	55	0	0	0	0	0	0	0	0	0	5	0	0	0	0	0	1	0	3	0	0	1	k__Bacteria;p__Chloroflexi;c__Chloroflexia;o__Chloroflexales;f__Chloroflexaceae;g__Chloronema;s__
OTU_1248	4	0	1	2	5	1	1	2	k__Bacteria;p__Proteobacteria;c__Alphaproteobacteria;o__Rhizobiales;f__Beijerinckiaceae;g__Roseiarcus;s__	0	0	10	0	0	0	2	0	0	0	0	4	14	0	1	0	1	0	0	0	2	4	0	0	k__Bacteria;p__Proteobacteria;c__Alphaproteobacteria;o__Rhizobiales;f__Beijerinckiaceae;g__Roseiarcus;s__
OTU_1249	3	0	2	18	3	3	1	3	k__Bacteria;p__Firmicutes;c__Clostridia;o__Oscillospirales;f__Eubacterium_coprostanoligenes_group;g__Eubacterium_coprostanoligenes_group;s__	6	0	2	0	0	0	0	1	5	50	1	3	6	1	0	0	8	0	0	2	0	0	7	2	k__Bacteria;p__Firmicutes;c__Clostridia;o__Oscillospirales;f__Eubacterium_coprostanoligenes_group;g__Eubacterium_coprostanoligenes_group;s__
OTU_1250	0	0	0	14	0	0	0	0	k__Bacteria;p__Firmicutes;c__Clostridia;o__Peptostreptococcales-Tissierellales;f__Peptostreptococcales-Tissierellales;g__Anaerococcus	0	0	0	0	0	0	0	0	0	41	0	0	0	0	0	0	0	0	0	0	0	0	0	0	k__Bacteria;p__Firmicutes;c__Clostridia;o__Peptostreptococcales-Tissierellales;f__Peptostreptococcales-Tissierellales;g__Anaerococcus
OTU_1251	0	0	2	1	1	2	0	1	k__Bacteria;p__Bacteroidota;c__Bacteroidia;o__Flavobacteriales;f__Flavobacteriaceae;g__Flavobacterium;s__Flavobacterium_caeni	0	0	0	0	0	0	3	1	0	0	0	2	0	1	1	0	1	3	0	0	0	0	0	1	k__Bacteria;p__Bacteroidota;c__Bacteroidia;o__Flavobacteriales;f__Flavobacteriaceae;g__Flavobacterium;s__Flavobacterium_caeni
OTU_1252	1	4	0	2	0	0	1	7	k__Bacteria;p__Cyanobacteria;c__Cyanobacteriia;o__Cyanobacteriales;f__Microcystaceae;g__Chalicogloea_CCALA_975	1	0	0	0	1	9	0	0	0	1	3	0	0	0	0	0	0	0	1	0	0	0	6	13	k__Bacteria;p__Cyanobacteria;c__Cyanobacteriia;o__Cyanobacteriales;f__Microcystaceae;g__Chalicogloea_CCALA_975
OTU_1253	3	2	1	1	1	1	1	3	k__Bacteria;p__Actinobacteriota;c__Actinobacteria;o__Pseudonocardiales;f__Pseudonocardiaceae;g__Pseudonocardia;s__	7	0	0	2	0	2	1	1	0	0	1	0	1	1	0	0	0	1	2	0	0	3	0	5	k__Bacteria;p__Actinobacteriota;c__Actinobacteria;o__Pseudonocardiales;f__Pseudonocardiaceae;g__Pseudonocardia;s__
OTU_1254	0	0	2	0	0	0	10	1	k__Bacteria;p__Bacteroidota;c__Bacteroidia;o__Chitinophagales;f__Saprospiraceae;g__;s__	0	0	0	0	0	0	0	0	4	0	0	0	0	0	0	0	0	0	4	4	22	0	2	0	k__Bacteria;p__Bacteroidota;c__Bacteroidia;o__Chitinophagales;f__Saprospiraceae;g__;s__
OTU_1255	0	0	2	6	0	0	0	0	k__Bacteria	0	0	0	0	0	0	5	1	0	9	5	2	0	0	0	0	0	0	0	0	0	0	0	0	k__Bacteria
OTU_1256	2	1	4	0	0	2	3	0	k__Bacteria;p__Firmicutes;c__Clostridia;o__MAT-CR-H4-C10;f__MAT-CR-H4-C10;g__MAT-CR-H4-C10;s__	0	5	0	0	0	1	11	0	0	0	0	0	0	0	0	0	5	0	9	0	0	0	0	0	k__Bacteria;p__Firmicutes;c__Clostridia;o__MAT-CR-H4-C10;f__MAT-CR-H4-C10;g__MAT-CR-H4-C10;s__
OTU_1257	0	0	0	12	0	0	0	0	k__Bacteria;p__Firmicutes;c__Clostridia;o__Oscillospirales;f__Ruminococcaceae;g__Candidatus_Soleaferrea;s__Ruminococcaceae_bacterium	0	0	0	0	0	0	0	0	0	35	0	0	0	0	0	0	0	0	0	0	0	0	0	0	k__Bacteria;p__Firmicutes;c__Clostridia;o__Oscillospirales;f__Ruminococcaceae;g__Candidatus_Soleaferrea;s__Ruminococcaceae_bacterium
OTU_1258	0	0	1	0	0	0	2	6	k__Bacteria;p__Proteobacteria;c__Alphaproteobacteria;o__;f__;g__;s__	0	0	0	0	0	0	0	0	3	0	0	0	0	0	0	0	0	0	0	0	5	17	0	0	k__Bacteria;p__Proteobacteria;c__Alphaproteobacteria;o__;f__;g__;s__
OTU_1259	3	0	2	0	0	1	4	11	k__Bacteria;p__Proteobacteria;c__Alphaproteobacteria;o__Acetobacterales;f__Acetobacteraceae;g__;s__	4	1	2	0	0	0	1	0	3	0	0	0	0	0	0	0	0	1	0	0	11	31	0	0	k__Bacteria;p__Proteobacteria;c__Alphaproteobacteria;o__Acetobacterales;f__Acetobacteraceae;g__;s__
OTU_1260	10	0	1	1	0	0	0	0	Unknown	0	0	28	0	0	0	0	0	1	0	1	0	0	0	0	0	0	0	0	0	0	0	0	0	Unknown
OTU_1261	1	0	0	1	0	0	2	10	k__Bacteria;p__Proteobacteria;c__Alphaproteobacteria	0	0	1	0	0	0	0	0	0	1	0	0	0	0	0	0	0	0	0	2	3	0	18	12	k__Bacteria;p__Proteobacteria;c__Alphaproteobacteria
OTU_1262	5	0	0	0	5	0	0	0	k__Bacteria;p__Firmicutes;c__Negativicutes;o__Veillonellales-Selenomonadales;f__Veillonellaceae;g__;s__	0	0	14	0	0	0	0	0	0	0	0	0	15	0	0	0	0	0	0	0	0	0	0	0	k__Bacteria;p__Firmicutes;c__Negativicutes;o__Veillonellales-Selenomonadales;f__Veillonellaceae;g__;s__
OTU_1263	0	0	1	1	0	0	8	4	k__Bacteria;p__Planctomycetota;c__Planctomycetes;o__Gemmatales;f__Gemmataceae	0	0	0	0	0	0	0	2	0	1	0	0	0	0	0	0	0	0	2	21	1	0	6	6	k__Bacteria;p__Planctomycetota;c__Planctomycetes;o__Gemmatales;f__Gemmataceae
OTU_1264	5	6	2	0	2	4	0	0	k__Bacteria;p__Bacteroidota;c__Bacteroidia;o__Bacteroidales;f__Dysgonomonadaceae;g__Petrimonas;s__	5	3	5	3	3	12	4	0	0	0	0	0	1	3	0	0	11	0	0	0	0	0	0	0	k__Bacteria;p__Bacteroidota;c__Bacteroidia;o__Bacteroidales;f__Dysgonomonadaceae;g__Petrimonas;s__
OTU_1266	2	9	0	0	3	0	0	0	k__Bacteria;p__Myxococcota;c__Polyangia;o__Polyangiales;f__Polyangiaceae;g__Pajaroellobacter;s__	3	1	0	24	1	0	0	0	0	0	0	0	1	0	8	0	0	0	0	0	0	0	0	0	k__Bacteria;p__Myxococcota;c__Polyangia;o__Polyangiales;f__Polyangiaceae;g__Pajaroellobacter;s__
OTU_1267	0	0	1	0	1	1	16	3	k__Bacteria;p__Planctomycetota;c__Planctomycetes;o__Pirellulales;f__Pirellulaceae;g__Pirellula;s__	0	0	0	0	0	0	0	0	2	0	0	0	1	0	0	0	0	1	0	0	46	3	1	5	k__Bacteria;p__Planctomycetota;c__Planctomycetes;o__Pirellulales;f__Pirellulaceae;g__Pirellula;s__
OTU_1268	0	0	3	0	0	0	8	3	k__Bacteria;p__Proteobacteria;c__Gammaproteobacteria;o__PLTA13;f__PLTA13;g__PLTA13;s__	0	0	0	0	0	0	0	0	8	0	0	0	0	0	0	0	0	0	2	0	22	3	1	3	k__Bacteria;p__Proteobacteria;c__Gammaproteobacteria;o__PLTA13;f__PLTA13;g__PLTA13;s__
OTU_1269	0	1	4	0	0	0	0	3	k__Bacteria;p__Firmicutes;c__Bacilli;o__Lactobacillales;f__Lactobacillaceae;g__Lactobacillus;s__Lactobacillus_plantarum	0	0	0	0	0	1	3	7	0	0	0	0	0	0	0	0	0	0	0	0	0	8	0	0	k__Bacteria;p__Firmicutes;c__Bacilli;o__Lactobacillales;f__Lactobacillaceae;g__Lactobacillus;s__Lactobacillus_plantarum
OTU_1270	0	0	0	1	0	0	0	0	Unknown	0	0	0	0	0	0	0	0	0	0	1	0	0	0	0	0	0	0	0	0	0	0	0	0	Unknown
OTU_1272	0	0	0	0	1	0	2	12	k__Bacteria;p__Proteobacteria;c__Alphaproteobacteria;o__Rhizobiales;f__Rhizobiales_Incertae_Sedis;g__Nordella	0	0	0	0	0	0	0	0	0	0	0	0	0	2	0	0	0	0	1	0	3	34	0	0	k__Bacteria;p__Proteobacteria;c__Alphaproteobacteria;o__Rhizobiales;f__Rhizobiales_Incertae_Sedis;g__Nordella
OTU_1273	2	0	1	17	1	0	0	0	k__Bacteria;p__Desulfobacterota;c__Desulfovibrionia;o__Desulfovibrionales;f__Desulfovibrionaceae;g__Bilophila;s__	5	0	0	0	0	0	1	0	1	49	2	0	0	0	1	0	0	0	0	0	0	0	0	0	k__Bacteria;p__Desulfobacterota;c__Desulfovibrionia;o__Desulfovibrionales;f__Desulfovibrionaceae;g__Bilophila;s__
OTU_1274	1	2	5	22	2	3	1	2	k__Bacteria;p__Firmicutes;c__Bacilli;o__Lactobacillales	2	1	0	0	0	5	5	7	2	58	5	1	1	1	2	0	7	2	0	1	0	2	3	0	k__Bacteria;p__Firmicutes;c__Bacilli;o__Lactobacillales
OTU_1275	2	0	0	0	0	0	0	14	k__Bacteria;p__Acidobacteriota;c__Vicinamibacteria;o__Vicinamibacterales;f__;g__;s__	4	0	0	0	0	0	0	0	0	0	0	0	0	0	0	0	0	0	0	0	0	40	0	2	k__Bacteria;p__Acidobacteriota;c__Vicinamibacteria;o__Vicinamibacterales;f__;g__;s__
OTU_1276	21	0	0	0	0	0	0	0	k__Bacteria	15	11	37	0	0	0	0	0	0	0	0	0	0	0	0	0	0	0	0	0	0	0	0	0	k__Bacteria
OTU_1277	0	4	0	0	0	6	0	0	k__Bacteria;p__Firmicutes;c__Clostridia;o__Clostridia_vadinBB60_group;f__Clostridia_vadinBB60_group;g__Clostridia_vadinBB60_group	0	0	0	0	0	10	0	0	0	0	0	0	0	0	0	0	18	0	0	0	0	0	0	0	k__Bacteria;p__Firmicutes;c__Clostridia;o__Clostridia_vadinBB60_group;f__Clostridia_vadinBB60_group;g__Clostridia_vadinBB60_group
OTU_1278	0	0	3	0	0	1	7	1	k__Bacteria;p__Proteobacteria;c__Gammaproteobacteria;o__Salinisphaerales;f__Solimonadaceae;g__Hydrocarboniphaga	0	0	0	0	0	0	0	0	9	0	0	0	0	0	0	0	0	1	2	0	19	0	0	2	k__Bacteria;p__Proteobacteria;c__Gammaproteobacteria;o__Salinisphaerales;f__Solimonadaceae;g__Hydrocarboniphaga
OTU_1279	2	0	6	1	0	0	4	1	k__Bacteria;p__Proteobacteria;c__Alphaproteobacteria;o__Sphingomonadales;f__Sphingomonadaceae;g__Sandarakinorhabdus	4	2	0	0	0	0	0	17	0	1	0	0	0	0	0	0	0	0	0	10	0	0	2	0	k__Bacteria;p__Proteobacteria;c__Alphaproteobacteria;o__Sphingomonadales;f__Sphingomonadaceae;g__Sandarakinorhabdus
OTU_1280	15	0	1	0	1	0	0	0	Unknown	10	10	23	0	0	0	0	0	1	0	0	0	3	0	0	0	0	0	0	0	0	0	0	0	Unknown
OTU_1281	10	0	0	6	1	0	0	0	Unknown	29	0	0	0	0	0	0	0	0	0	18	0	0	0	1	0	0	0	0	0	0	0	0	0	Unknown
OTU_1282	0	0	1	13	0	0	0	0	k__Bacteria;p__Bacteroidota;c__Bacteroidia;o__Bacteroidales;f__Muribaculaceae;g__Muribaculaceae;s__	0	0	0	0	0	0	1	0	0	39	0	0	0	0	0	0	0	0	0	0	0	0	0	0	k__Bacteria;p__Bacteroidota;c__Bacteroidia;o__Bacteroidales;f__Muribaculaceae;g__Muribaculaceae;s__
OTU_1283	0	0	1	1	0	1	7	1	k__Bacteria;p__Bdellovibrionota;c__Bdellovibrionia;o__Bdellovibrionales;f__Bdellovibrionaceae;g__Bdellovibrio	0	0	0	0	0	0	0	0	2	0	0	1	0	0	0	0	0	1	1	2	17	1	1	0	k__Bacteria;p__Bdellovibrionota;c__Bdellovibrionia;o__Bdellovibrionales;f__Bdellovibrionaceae;g__Bdellovibrio
OTU_1284	0	0	3	0	0	0	7	0	k__Bacteria	0	0	0	0	0	0	0	7	0	0	0	0	0	0	0	0	0	0	2	17	0	0	0	0	k__Bacteria
OTU_1285	0	0	0	18	0	0	0	0	k__Bacteria;p__Firmicutes;c__Clostridia;o__Oscillospirales;f__Ruminococcaceae;g__;s__	0	0	0	0	0	0	0	0	0	54	0	0	0	0	0	0	0	0	0	0	0	0	0	0	k__Bacteria;p__Firmicutes;c__Clostridia;o__Oscillospirales;f__Ruminococcaceae;g__;s__
OTU_1286	0	0	3	0	0	1	7	1	k__Bacteria;p__Proteobacteria;c__Gammaproteobacteria;o__Burkholderiales;f__Nitrosomonadaceae;g__MND1;s__	0	0	0	0	0	0	9	0	0	0	0	0	0	0	0	0	0	2	19	0	2	0	0	1	k__Bacteria;p__Proteobacteria;c__Gammaproteobacteria;o__Burkholderiales;f__Nitrosomonadaceae;g__MND1;s__
OTU_1287	0	0	2	0	0	0	12	23	k__Bacteria;p__Actinobacteriota;c__Acidimicrobiia;o__Microtrichales;f__Ilumatobacteraceae;g__;s__	0	0	0	0	0	0	0	4	2	0	0	0	0	0	0	0	0	0	2	14	18	66	0	2	k__Bacteria;p__Actinobacteriota;c__Acidimicrobiia;o__Microtrichales;f__Ilumatobacteraceae;g__;s__
OTU_1288	1	0	3	1	0	0	6	5	k__Bacteria;p__Desulfobacterota;c__Desulfuromonadia;o__PB19;f__PB19;g__PB19;s__	0	0	3	0	0	0	0	0	8	0	2	0	0	0	0	0	0	0	1	0	15	1	0	12	k__Bacteria;p__Desulfobacterota;c__Desulfuromonadia;o__PB19;f__PB19;g__PB19;s__
OTU_1289	2	3	0	1	0	8	0	0	k__Bacteria;p__Firmicutes;c__Clostridia;o__Peptostreptococcales-Tissierellales;f__Peptostreptococcales-Tissierellales;g__Tepidimicrobium;s__Clostridium_ultunense	0	5	0	0	0	7	0	0	0	0	0	2	0	0	0	0	22	0	0	0	0	0	0	0	k__Bacteria;p__Firmicutes;c__Clostridia;o__Peptostreptococcales-Tissierellales;f__Peptostreptococcales-Tissierellales;g__Tepidimicrobium;s__Clostridium_ultunense
OTU_1290	4	0	0	0	6	0	0	0	k__Bacteria;p__Firmicutes;c__Clostridia;o__Oscillospirales;f__Oscillospiraceae;g__UCG-002;s__	0	0	10	0	0	0	0	0	0	0	0	0	17	0	0	0	0	0	0	0	0	0	0	0	k__Bacteria;p__Firmicutes;c__Clostridia;o__Oscillospirales;f__Oscillospiraceae;g__UCG-002;s__
OTU_1291	2	0	1	6	2	1	0	0	k__Bacteria;p__Firmicutes;c__Clostridia;o__Oscillospirales;f__Ruminococcaceae;g__Eubacterium_siraeum_group;s__Eubacterium_siraeum	0	0	6	0	0	0	1	0	0	17	0	0	4	1	0	2	0	0	0	0	0	0	0	0	k__Bacteria;p__Firmicutes;c__Clostridia;o__Oscillospirales;f__Ruminococcaceae;g__Eubacterium_siraeum_group;s__Eubacterium_siraeum
OTU_1292	0	0	3	0	0	0	3	1	k__Bacteria;p__Proteobacteria;c__Alphaproteobacteria;o__Rickettsiales;f__SM2D12;g__SM2D12;s__	0	0	0	0	0	0	0	0	8	0	0	0	0	0	0	0	0	0	2	1	6	0	0	2	k__Bacteria;p__Proteobacteria;c__Alphaproteobacteria;o__Rickettsiales;f__SM2D12;g__SM2D12;s__
OTU_1293	2	0	0	1	0	1	4	8	k__Bacteria;p__WPS-2;c__WPS-2;o__WPS-2;f__WPS-2;g__WPS-2;s__hydrothermal_vent	5	0	0	0	0	0	0	0	0	1	1	0	0	0	0	0	0	1	3	3	5	1	6	17	k__Bacteria;p__WPS-2;c__WPS-2;o__WPS-2;f__WPS-2;g__WPS-2;s__hydrothermal_vent
OTU_1294	0	0	1	29	0	0	0	0	k__Bacteria;p__Bacteroidota;c__Bacteroidia;o__Bacteroidales;f__Muribaculaceae;g__Muribaculaceae;s__	0	0	0	0	0	0	0	1	0	83	2	0	0	0	0	0	0	0	0	0	0	0	0	0	k__Bacteria;p__Bacteroidota;c__Bacteroidia;o__Bacteroidales;f__Muribaculaceae;g__Muribaculaceae;s__
OTU_1296	6	0	1	2	4	0	0	0	k__Bacteria;p__Actinobacteriota;c__Actinobacteria;o__Micrococcales;f__Micrococcaceae;g__Nesterenkonia;s__Nesterenkonia_sp.	0	0	17	0	0	0	1	0	0	3	1	0	12	0	0	0	0	0	0	0	0	0	0	0	k__Bacteria;p__Actinobacteriota;c__Actinobacteria;o__Micrococcales;f__Micrococcaceae;g__Nesterenkonia;s__Nesterenkonia_sp.
OTU_1297	0	5	0	0	2	5	0	0	k__Bacteria	0	0	0	0	13	0	0	0	0	0	0	0	0	4	0	0	14	0	0	0	0	0	0	0	k__Bacteria
OTU_1298	0	6	0	0	4	2	0	0	Unknown	0	0	0	16	0	0	0	0	0	0	0	0	10	0	1	5	0	0	0	0	0	0	0	0	Unknown
OTU_1299	2	0	4	2	3	1	0	2	k__Bacteria;p__Firmicutes;c__Clostridia;o__Lachnospirales;f__Lachnospiraceae;g__Eubacterium_ruminantium_group;s__	3	1	2	0	0	0	4	6	1	4	1	0	8	0	0	1	0	0	0	0	0	0	2	3	k__Bacteria;p__Firmicutes;c__Clostridia;o__Lachnospirales;f__Lachnospiraceae;g__Eubacterium_ruminantium_group;s__
OTU_1300	2	4	0	0	0	1	6	4	k__Bacteria;p__Bacteroidota;c__Bacteroidia;o__Cytophagales;f__Cytophagaceae;g__Cytophaga	2	1	1	2	8	1	0	0	0	0	0	0	0	0	0	2	0	0	7	0	10	0	8	3	k__Bacteria;p__Bacteroidota;c__Bacteroidia;o__Cytophagales;f__Cytophagaceae;g__Cytophaga
OTU_1302	0	0	4	0	0	1	8	0	k__Bacteria;p__Proteobacteria;c__Alphaproteobacteria;o__Caulobacterales;f__Caulobacteraceae	0	0	0	0	0	0	0	0	10	0	0	0	0	0	0	0	3	0	1	0	22	0	0	0	k__Bacteria;p__Proteobacteria;c__Alphaproteobacteria;o__Caulobacterales;f__Caulobacteraceae
OTU_1303	0	1	0	7	1	0	0	0	k__Bacteria;p__Firmicutes;c__Clostridia;o__Oscillospirales;f__Oscillospiraceae;g__Oscillibacter;s__	0	0	0	2	0	1	0	0	0	20	0	0	0	1	0	0	0	0	0	0	0	0	0	0	k__Bacteria;p__Firmicutes;c__Clostridia;o__Oscillospirales;f__Oscillospiraceae;g__Oscillibacter;s__
OTU_1304	5	1	1	2	2	1	1	0	k__Bacteria;p__Proteobacteria;c__Gammaproteobacteria;o__Salinisphaerales;f__Solimonadaceae;g__;s__	0	2	12	0	0	3	0	0	2	0	0	4	2	0	2	1	0	0	0	0	1	0	0	0	k__Bacteria;p__Proteobacteria;c__Gammaproteobacteria;o__Salinisphaerales;f__Solimonadaceae;g__;s__
OTU_1305	0	1	0	0	2	8	1	0	Unknown	0	0	0	1	0	0	0	0	0	0	0	0	2	0	2	0	0	22	0	1	0	0	0	0	Unknown
OTU_1306	2	2	3	4	4	2	2	40	k__Bacteria;p__Proteobacteria;c__Alphaproteobacteria;o__Rhodobacterales;f__Rhodobacteraceae;g__Amaricoccus;s__	6	0	0	3	1	2	1	5	1	7	2	1	0	3	7	1	0	4	0	2	3	79	6	34	k__Bacteria;p__Proteobacteria;c__Alphaproteobacteria;o__Rhodobacterales;f__Rhodobacteraceae;g__Amaricoccus;s__
OTU_1307	1	0	1	0	0	2	4	27	k__Bacteria;p__Proteobacteria;c__Alphaproteobacteria;o__Dongiales;f__Dongiaceae;g__Dongia;s__	1	0	0	0	0	0	2	0	0	0	0	0	0	0	0	0	0	5	2	0	9	78	1	1	k__Bacteria;p__Proteobacteria;c__Alphaproteobacteria;o__Dongiales;f__Dongiaceae;g__Dongia;s__
OTU_1308	0	0	2	22	0	0	0	0	k__Bacteria;p__Bacteroidota;c__Bacteroidia;o__Bacteroidales;f__Muribaculaceae;g__Muribaculaceae;s__	0	0	0	0	0	0	4	0	0	64	0	0	0	0	0	0	0	0	0	0	0	0	0	0	k__Bacteria;p__Bacteroidota;c__Bacteroidia;o__Bacteroidales;f__Muribaculaceae;g__Muribaculaceae;s__
OTU_1309	0	1	0	2	1	1	2	6	k__Bacteria;p__Firmicutes;c__Clostridia;o__Peptostreptococcales-Tissierellales;f__Fusibacteraceae;g__Fusibacter	0	0	0	0	2	1	0	0	0	6	0	0	0	2	0	2	0	0	0	2	4	0	13	4	k__Bacteria;p__Firmicutes;c__Clostridia;o__Peptostreptococcales-Tissierellales;f__Fusibacteraceae;g__Fusibacter
OTU_1310	0	0	10	0	0	0	5	0	k__Bacteria;p__Firmicutes;c__Clostridia;o__Peptostreptococcales-Tissierellales	0	0	0	0	0	0	28	0	0	0	0	0	0	0	0	0	0	0	15	0	0	0	0	0	k__Bacteria;p__Firmicutes;c__Clostridia;o__Peptostreptococcales-Tissierellales
OTU_1311	0	0	1	0	0	1	16	1	k__Bacteria;p__Bacteroidota;c__Bacteroidia;o__Chitinophagales;f__Saprospiraceae;g__;s__	0	0	0	0	0	0	0	0	3	0	0	0	0	0	0	0	0	3	1	0	45	0	1	0	k__Bacteria;p__Bacteroidota;c__Bacteroidia;o__Chitinophagales;f__Saprospiraceae;g__;s__
OTU_1312	0	0	0	0	0	0	0	13	k__Bacteria;p__Spirochaetota;c__Spirochaetia;o__Spirochaetales;f__Spirochaetaceae;g__Treponema	0	0	0	0	0	0	0	0	0	0	0	0	0	0	0	0	0	0	0	0	0	0	24	14	k__Bacteria;p__Spirochaetota;c__Spirochaetia;o__Spirochaetales;f__Spirochaetaceae;g__Treponema
OTU_1313	0	0	0	13	0	0	0	0	k__Bacteria;p__Cyanobacteria;c__Cyanobacteriia;o__Chloroplast;f__Chloroplast;g__Chloroplast	0	0	0	0	0	0	0	0	0	38	0	0	0	0	0	0	0	0	0	0	0	0	0	0	k__Bacteria;p__Cyanobacteria;c__Cyanobacteriia;o__Chloroplast;f__Chloroplast;g__Chloroplast
OTU_1314	0	1	0	0	0	0	0	10	k__Bacteria;p__Verrucomicrobiota;c__Verrucomicrobiae;o__Pedosphaerales;f__Pedosphaeraceae	0	0	0	2	0	0	0	0	0	0	0	0	0	0	0	0	0	0	0	0	0	28	0	0	k__Bacteria;p__Verrucomicrobiota;c__Verrucomicrobiae;o__Pedosphaerales;f__Pedosphaeraceae
OTU_1315	1	2	0	2	0	0	1	7	k__Bacteria;p__Verrucomicrobiota;c__Verrucomicrobiae;o__Chthoniobacterales;f__Xiphinematobacteraceae;g__Candidatus_Xiphinematobacter;s__	1	1	0	4	0	1	0	0	0	2	2	0	0	0	0	0	0	0	0	1	2	2	8	11	k__Bacteria;p__Verrucomicrobiota;c__Verrucomicrobiae;o__Chthoniobacterales;f__Xiphinematobacteraceae;g__Candidatus_Xiphinematobacter;s__
OTU_1316	1	1	0	0	0	1	2	9	k__Bacteria;p__Bacteroidota;c__Bacteroidia;o__Cytophagales;f__Microscillaceae;g__	3	0	0	1	0	2	0	0	0	0	0	0	0	0	0	0	0	1	2	1	2	0	8	19	k__Bacteria;p__Bacteroidota;c__Bacteroidia;o__Cytophagales;f__Microscillaceae;g__
OTU_1317	3	0	5	0	5	1	6	5	k__Bacteria;p__Proteobacteria;c__Alphaproteobacteria;o__Rhizobiales;f__Beijerinckiaceae;g__Methylovirgula;s__	0	0	9	0	0	0	8	4	1	0	0	0	14	0	0	1	0	0	12	4	1	15	0	0	k__Bacteria;p__Proteobacteria;c__Alphaproteobacteria;o__Rhizobiales;f__Beijerinckiaceae;g__Methylovirgula;s__
OTU_1319	0	0	1	0	0	0	12	3	k__Bacteria;p__Planctomycetota;c__Planctomycetes;o__Isosphaerales;f__Isosphaeraceae;g__;s__	0	0	0	0	0	0	0	0	1	0	0	0	0	0	0	0	0	0	0	2	33	0	0	7	k__Bacteria;p__Planctomycetota;c__Planctomycetes;o__Isosphaerales;f__Isosphaeraceae;g__;s__
OTU_1320	0	0	2	0	0	0	15	0	k__Bacteria;p__Planctomycetota;c__Planctomycetes;o__Isosphaerales;f__Isosphaeraceae;g__	0	0	0	0	0	0	0	2	3	0	0	0	0	0	0	0	0	0	6	0	39	0	0	0	k__Bacteria;p__Planctomycetota;c__Planctomycetes;o__Isosphaerales;f__Isosphaeraceae;g__
OTU_1321	0	0	6	0	0	0	3	0	k__Bacteria;p__Gemmatimonadota;c__Longimicrobia;o__Longimicrobiales;f__Longimicrobiaceae;g__Longimicrobiaceae;s__	0	0	0	0	0	0	18	0	0	0	0	0	0	0	0	0	0	0	7	0	0	0	0	0	k__Bacteria;p__Gemmatimonadota;c__Longimicrobia;o__Longimicrobiales;f__Longimicrobiaceae;g__Longimicrobiaceae;s__
OTU_1322	1	1	0	1	0	1	1	18	k__Bacteria;p__Proteobacteria;c__Gammaproteobacteria;o__Burkholderiales;f__Rhodocyclaceae;g__Uliginosibacterium;s__	0	1	0	0	3	0	0	0	0	2	0	0	0	0	0	3	0	0	2	1	0	0	44	10	k__Bacteria;p__Proteobacteria;c__Gammaproteobacteria;o__Burkholderiales;f__Rhodocyclaceae;g__Uliginosibacterium;s__
OTU_1323	0	2	2	0	0	6	1	0	k__Bacteria;p__Firmicutes;c__Clostridia;o__Peptostreptococcales-Tissierellales;f__Anaerovoracaceae;g__Anaerovorax;s__	0	0	0	0	0	5	5	0	0	0	0	0	0	0	0	0	17	0	2	0	0	0	0	0	k__Bacteria;p__Firmicutes;c__Clostridia;o__Peptostreptococcales-Tissierellales;f__Anaerovoracaceae;g__Anaerovorax;s__
OTU_1324	2	0	3	10	3	1	0	1	k__Bacteria;p__Firmicutes;c__Negativicutes;o__Veillonellales-Selenomonadales;f__Veillonellaceae;g__Dialister;s__Dialister_invisus	0	4	1	0	0	0	3	4	1	27	2	1	1	2	6	1	2	0	0	0	0	0	1	0	k__Bacteria;p__Firmicutes;c__Negativicutes;o__Veillonellales-Selenomonadales;f__Veillonellaceae;g__Dialister;s__Dialister_invisus
OTU_1325	0	2	4	0	0	2	3	0	k__Bacteria;p__Synergistota;c__Synergistia;o__Synergistales;f__Synergistaceae;g__	0	0	0	0	0	6	12	0	0	0	0	0	0	0	0	0	6	0	7	0	0	0	0	0	k__Bacteria;p__Synergistota;c__Synergistia;o__Synergistales;f__Synergistaceae;g__
OTU_1326	2	0	5	0	0	0	12	4	k__Bacteria;p__Actinobacteriota;c__Actinobacteria;o__PeM15;f__PeM15;g__PeM15;s__	4	0	0	0	0	0	0	14	0	0	0	0	0	0	0	0	0	0	4	25	6	2	6	3	k__Bacteria;p__Actinobacteriota;c__Actinobacteria;o__PeM15;f__PeM15;g__PeM15;s__
OTU_1327	2	9	1	0	0	0	1	3	k__Bacteria;p__Bacteroidota;c__Bacteroidia;o__Chitinophagales;f__Chitinophagaceae;g__Sediminibacterium;s__	4	0	0	3	23	1	1	0	0	0	0	0	0	0	0	0	0	0	2	0	0	0	0	7	k__Bacteria;p__Bacteroidota;c__Bacteroidia;o__Chitinophagales;f__Chitinophagaceae;g__Sediminibacterium;s__
OTU_1328	0	1	7	0	0	0	3	0	k__Bacteria;p__Actinobacteriota;c__Actinobacteria;o__Propionibacteriales;f__Propionibacteriaceae;g__Propionimicrobium;s__	0	0	0	0	0	1	21	0	0	0	0	0	0	0	0	0	0	0	8	0	0	0	0	0	k__Bacteria;p__Actinobacteriota;c__Actinobacteria;o__Propionibacteriales;f__Propionibacteriaceae;g__Propionimicrobium;s__
OTU_1329	4	0	6	13	1	0	0	1	k__Bacteria	7	1	3	0	0	0	10	5	2	31	3	4	2	0	0	0	0	0	0	0	0	0	0	1	k__Bacteria
OTU_1330	6	2	34	3	4	7	179	112	k__Bacteria;p__Proteobacteria;c__Alphaproteobacteria;o__Rhizobiales;f__Xanthobacteraceae;g__;s__	10	0	6	1	0	3	17	84	1	2	3	4	8	0	3	4	2	15	81	413	43	272	14	50	k__Bacteria;p__Proteobacteria;c__Alphaproteobacteria;o__Rhizobiales;f__Xanthobacteraceae;g__;s__
OTU_1331	0	0	0	1	0	0	0	10	k__Bacteria;p__Chloroflexi;c__Anaerolineae;o__SBR1031;f__A4b;g__OLB15	0	0	0	0	0	0	0	0	0	0	2	0	0	0	0	0	0	0	0	0	0	18	0	11	k__Bacteria;p__Chloroflexi;c__Anaerolineae;o__SBR1031;f__A4b;g__OLB15
OTU_1332	5	0	0	2	3	0	1	0	k__Bacteria;p__Firmicutes;c__Bacilli;o__Lactobacillales;f__Lactobacillaceae;g__Lactobacillus;s__Lactobacillus_iners	0	1	13	0	0	0	0	0	0	1	0	3	7	0	0	0	0	0	1	0	0	0	0	0	k__Bacteria;p__Firmicutes;c__Bacilli;o__Lactobacillales;f__Lactobacillaceae;g__Lactobacillus;s__Lactobacillus_iners
OTU_1333	0	2	4	0	0	1	6	0	k__Bacteria;p__Bacteroidota;c__Bacteroidia;o__Bacteroidales;f__Rikenellaceae	0	0	0	0	0	4	10	0	0	0	0	0	0	0	0	0	1	0	16	0	0	0	0	0	k__Bacteria;p__Bacteroidota;c__Bacteroidia;o__Bacteroidales;f__Rikenellaceae
OTU_1334	4	0	1	0	5	0	0	1	k__Bacteria;p__Firmicutes;c__Bacilli;o__Lactobacillales;f__Lactobacillaceae;g__Lactobacillus;s__Lactobacillus_aviarius	0	0	12	0	0	0	0	1	0	0	0	0	14	0	0	0	0	0	0	0	0	1	0	0	k__Bacteria;p__Firmicutes;c__Bacilli;o__Lactobacillales;f__Lactobacillaceae;g__Lactobacillus;s__Lactobacillus_aviarius
OTU_1335	0	0	3	0	0	2	19	1	k__Bacteria;p__Bacteroidota;c__Kapabacteria;o__Kapabacteriales;f__Kapabacteriales;g__Kapabacteriales;s__	0	0	0	0	0	0	7	0	1	0	0	0	0	0	0	0	0	4	43	9	4	0	1	1	k__Bacteria;p__Bacteroidota;c__Kapabacteria;o__Kapabacteriales;f__Kapabacteriales;g__Kapabacteriales;s__
OTU_1336	0	0	0	11	0	0	0	0	k__Bacteria;p__Firmicutes;c__Clostridia;o__Oscillospirales;f__Oscillospiraceae;g__UCG-005;s__	0	0	0	0	0	0	0	0	0	31	0	0	0	0	0	0	0	0	0	0	0	0	0	0	k__Bacteria;p__Firmicutes;c__Clostridia;o__Oscillospirales;f__Oscillospiraceae;g__UCG-005;s__
OTU_1337	0	0	3	0	0	0	12	1	k__Bacteria;p__Acidobacteriota;c__Blastocatellia	0	0	0	0	0	0	7	0	1	0	0	0	0	0	0	0	0	0	21	2	13	0	0	2	k__Bacteria;p__Acidobacteriota;c__Blastocatellia
OTU_1338	2	0	9	4	6	8	1	1	k__Bacteria;p__Firmicutes;c__Bacilli	1	2	1	0	0	0	7	11	7	4	3	3	11	3	3	3	11	10	3	0	0	0	1	1	k__Bacteria;p__Firmicutes;c__Bacilli
OTU_1339	3	0	6	5	4	4	1	1	k__Bacteria;p__Firmicutes;c__Clostridia;o__Oscillospirales;f__Ruminococcaceae;g__Incertae_Sedis;s__	0	4	5	0	0	0	5	8	3	9	1	3	7	0	4	2	9	0	2	0	0	0	1	0	k__Bacteria;p__Firmicutes;c__Clostridia;o__Oscillospirales;f__Ruminococcaceae;g__Incertae_Sedis;s__
OTU_1340	2	4	3	0	0	7	2	0	k__Bacteria;p__Firmicutes;c__Bacilli;o__Lactobacillales;f__Streptococcaceae;g__Streptococcus;s__Streptococcus_henryi	0	4	0	0	0	10	7	0	0	0	0	0	0	0	0	0	20	0	4	0	0	0	0	0	k__Bacteria;p__Firmicutes;c__Bacilli;o__Lactobacillales;f__Streptococcaceae;g__Streptococcus;s__Streptococcus_henryi
OTU_1341	1	0	0	9	0	0	0	0	k__Bacteria;p__Bacteroidota;c__Bacteroidia;o__Bacteroidales;f__Muribaculaceae;g__Muribaculaceae;s__	2	0	0	0	0	0	0	0	0	24	2	1	0	0	0	0	0	0	0	0	0	0	0	0	k__Bacteria;p__Bacteroidota;c__Bacteroidia;o__Bacteroidales;f__Muribaculaceae;g__Muribaculaceae;s__
OTU_1342	3	6	4	0	1	2	11	1	k__Bacteria;p__Proteobacteria;c__Gammaproteobacteria;o__Burkholderiales;f__Chitinibacteraceae;g__Deefgea	2	3	2	3	12	1	0	0	12	0	0	0	0	2	0	4	0	1	1	0	31	0	2	1	k__Bacteria;p__Proteobacteria;c__Gammaproteobacteria;o__Burkholderiales;f__Chitinibacteraceae;g__Deefgea
OTU_1343	0	5	0	0	5	2	0	0	k__Bacteria	0	0	0	13	0	0	0	0	0	0	0	0	15	0	0	4	0	0	0	0	0	0	0	0	k__Bacteria
OTU_1344	0	0	7	1	0	1	0	1	k__Bacteria;p__Bdellovibrionota;c__Bdellovibrionia;o__Bdellovibrionales;f__Bdellovibrionaceae;g__Bdellovibrio;s__Bdellovibrio_sp.	0	0	0	0	0	0	19	0	0	1	0	0	0	0	0	0	1	1	0	0	0	1	0	0	k__Bacteria;p__Bdellovibrionota;c__Bdellovibrionia;o__Bdellovibrionales;f__Bdellovibrionaceae;g__Bdellovibrio;s__Bdellovibrio_sp.
OTU_1345	0	0	3	19	1	2	0	2	k__Bacteria;p__Firmicutes;c__Clostridia;o__Lachnospirales;f__Lachnospiraceae;g__Lachnospiraceae_UCG-010;s__	0	0	0	0	0	0	1	4	2	53	3	0	0	1	1	4	1	0	0	0	0	0	4	0	k__Bacteria;p__Firmicutes;c__Clostridia;o__Lachnospirales;f__Lachnospiraceae;g__Lachnospiraceae_UCG-010;s__
OTU_1346	0	0	5	0	0	0	3	0	k__Bacteria;p__Verrucomicrobiota;c__Verrucomicrobiae;o__Pedosphaerales;f__Pedosphaeraceae;g__ADurb.Bin118;s__Verrucomicrobia_bacterium	0	0	0	0	0	0	14	0	0	0	0	0	0	0	0	0	0	0	8	0	0	0	0	0	k__Bacteria;p__Verrucomicrobiota;c__Verrucomicrobiae;o__Pedosphaerales;f__Pedosphaeraceae;g__ADurb.Bin118;s__Verrucomicrobia_bacterium
OTU_1347	0	0	1	6	0	0	0	0	k__Bacteria	0	0	0	0	0	0	0	3	0	0	8	10	0	0	0	0	0	0	0	0	0	0	0	0	k__Bacteria
OTU_1348	4	15	0	0	3	1	1	24	k__Bacteria;p__Chloroflexi;c__Anaerolineae;o__Caldilineales;f__Caldilineaceae;g__;s__	6	3	1	32	1	12	0	0	0	0	0	0	0	0	8	1	1	0	0	0	2	61	1	9	k__Bacteria;p__Chloroflexi;c__Anaerolineae;o__Caldilineales;f__Caldilineaceae;g__;s__
OTU_1349	0	0	1	2	0	0	0	0	k__Bacteria;p__Actinobacteriota;c__Coriobacteriia;o__Coriobacteriales;f__Atopobiaceae	0	0	0	0	0	0	0	2	0	4	0	0	0	0	0	0	0	0	0	0	0	0	0	0	k__Bacteria;p__Actinobacteriota;c__Coriobacteriia;o__Coriobacteriales;f__Atopobiaceae
OTU_1350	0	5	0	3	0	0	1	11	k__Bacteria;p__Bacteroidota;c__Bacteroidia;o__Cytophagales;f__Cytophagaceae;g__Cytophaga;s__	0	0	0	0	13	0	0	0	0	9	0	0	0	0	0	0	0	0	0	0	2	0	25	8	k__Bacteria;p__Bacteroidota;c__Bacteroidia;o__Cytophagales;f__Cytophagaceae;g__Cytophaga;s__
OTU_1351	0	0	1	0	0	0	18	1	k__Bacteria;p__Bacteroidota;c__Bacteroidia;o__Sphingobacteriales;f__env.OPS_17;g__env.OPS_17;s__	0	0	0	0	0	0	0	0	3	0	0	0	0	0	0	0	0	0	1	1	52	0	0	1	k__Bacteria;p__Bacteroidota;c__Bacteroidia;o__Sphingobacteriales;f__env.OPS_17;g__env.OPS_17;s__
OTU_1352	0	0	0	2	0	0	0	0	k__Bacteria	0	0	0	0	0	0	0	0	0	0	2	4	0	0	0	0	0	0	0	0	0	0	0	0	k__Bacteria
OTU_1353	2	11	0	0	0	2	0	0	k__Bacteria;p__Verrucomicrobiota;c__Chlamydiae;o__Chlamydiales;f__Simkaniaceae	3	0	3	0	31	0	0	0	0	0	0	0	0	0	0	5	0	0	0	0	0	0	0	0	k__Bacteria;p__Verrucomicrobiota;c__Chlamydiae;o__Chlamydiales;f__Simkaniaceae
OTU_1354	7	1	2	1	0	0	5	2	k__Bacteria;p__Proteobacteria;c__Alphaproteobacteria;o__Rhizobiales	13	2	5	3	0	0	1	0	4	0	1	0	0	0	0	0	0	0	1	0	12	0	0	4	k__Bacteria;p__Proteobacteria;c__Alphaproteobacteria;o__Rhizobiales
OTU_1355	1	1	19	0	0	2	8	0	k__Bacteria;p__Firmicutes;c__Incertae_Sedis;o__DTU014;f__DTU014;g__DTU014;s__	0	3	0	0	0	1	57	0	0	0	0	0	0	0	0	0	4	0	21	0	1	0	0	0	k__Bacteria;p__Firmicutes;c__Incertae_Sedis;o__DTU014;f__DTU014;g__DTU014;s__
OTU_1356	1	0	1	1	0	2	0	8	k__Bacteria;p__Actinobacteriota;c__Actinobacteria;o__Micrococcales;f__Micrococcaceae;g__Rothia;s__Rothia_sp.	1	0	0	0	0	0	3	0	0	0	1	0	0	0	0	3	1	0	0	0	0	23	0	0	k__Bacteria;p__Actinobacteriota;c__Actinobacteria;o__Micrococcales;f__Micrococcaceae;g__Rothia;s__Rothia_sp.
OTU_1357	0	0	2	13	1	0	0	0	k__Bacteria;p__Proteobacteria;c__Alphaproteobacteria;o__SAR11_clade;f__Clade_I;g__Clade_Ia;s__	0	0	0	0	0	0	5	1	0	23	9	6	2	0	0	0	0	0	0	0	0	0	0	0	k__Bacteria;p__Proteobacteria;c__Alphaproteobacteria;o__SAR11_clade;f__Clade_I;g__Clade_Ia;s__
OTU_1358	0	0	6	6	0	0	0	0	Unknown	0	0	0	0	0	0	4	14	0	5	4	7	0	0	0	0	0	0	0	0	0	0	0	0	Unknown
OTU_1359	2	0	0	0	9	0	0	0	k__Bacteria;p__Actinobacteriota;c__Actinobacteria;o__Frankiales;f__Acidothermaceae;g__Acidothermus;s__	0	0	4	0	0	0	0	0	0	0	0	0	25	0	0	0	0	0	0	0	0	0	0	0	k__Bacteria;p__Actinobacteriota;c__Actinobacteria;o__Frankiales;f__Acidothermaceae;g__Acidothermus;s__
OTU_1360	5	0	8	4	0	1	0	0	Unknown	7	3	3	0	0	0	3	14	7	1	8	3	0	0	0	0	1	0	0	0	0	0	0	0	Unknown
OTU_1361	1	0	4	2	1	6	1	4	k__Bacteria;p__Proteobacteria;c__Alphaproteobacteria;o__Rickettsiales;f__Mitochondria;g__Mitochondria;s__Arachis_hypogaea	2	0	0	0	0	0	7	3	0	1	4	0	1	0	0	0	0	17	2	0	1	6	0	5	k__Bacteria;p__Proteobacteria;c__Alphaproteobacteria;o__Rickettsiales;f__Mitochondria;g__Mitochondria;s__Arachis_hypogaea
OTU_1362	0	0	9	0	0	0	3	0	k__Bacteria;p__Proteobacteria;c__Gammaproteobacteria;o__Ectothiorhodospirales;f__Thioalkalispiraceae;g__;s__	0	0	0	0	0	0	27	0	0	0	0	0	0	0	0	0	0	0	9	0	0	0	0	0	k__Bacteria;p__Proteobacteria;c__Gammaproteobacteria;o__Ectothiorhodospirales;f__Thioalkalispiraceae;g__;s__
OTU_1363	0	0	3	0	0	0	3	0	k__Bacteria;p__Proteobacteria;c__Alphaproteobacteria;o__Sphingomonadales;f__Sphingomonadaceae;g__DSSF69;s__	0	0	0	0	0	0	8	0	0	0	0	0	0	0	0	0	0	0	8	0	0	0	0	0	k__Bacteria;p__Proteobacteria;c__Alphaproteobacteria;o__Sphingomonadales;f__Sphingomonadaceae;g__DSSF69;s__
OTU_1364	0	0	1	0	0	0	10	1	k__Bacteria;p__Proteobacteria;c__Gammaproteobacteria;o__Burkholderiales	0	0	0	0	0	0	0	0	3	0	0	0	0	0	0	0	0	0	3	1	25	0	0	2	k__Bacteria;p__Proteobacteria;c__Gammaproteobacteria;o__Burkholderiales
OTU_1365	0	0	5	0	0	0	7	0	k__Bacteria;p__Bacteroidota;c__Bacteroidia;o__Bacteroidales;f__Bacteroidetes_vadinHA17;g__Bacteroidetes_vadinHA17;s__	0	0	0	0	0	0	13	0	0	0	0	0	0	0	0	0	0	0	20	0	0	0	0	0	k__Bacteria;p__Bacteroidota;c__Bacteroidia;o__Bacteroidales;f__Bacteroidetes_vadinHA17;g__Bacteroidetes_vadinHA17;s__
OTU_1366	2	0	1	7	0	0	0	1	k__Bacteria;p__Firmicutes;c__Clostridia;o__Oscillospirales;f__Eubacterium_coprostanoligenes_group;g__Eubacterium_coprostanoligenes_group;s__	6	0	0	0	0	0	0	0	1	15	4	0	0	0	0	0	0	0	0	0	0	0	0	1	k__Bacteria;p__Firmicutes;c__Clostridia;o__Oscillospirales;f__Eubacterium_coprostanoligenes_group;g__Eubacterium_coprostanoligenes_group;s__
OTU_1367	3	5	0	1	0	3	2	1	k__Bacteria;p__Proteobacteria;c__Alphaproteobacteria;o__Acetobacterales;f__Acetobacteraceae	4	1	2	1	11	1	0	0	0	2	0	0	0	0	0	7	0	0	5	0	0	0	0	2	k__Bacteria;p__Proteobacteria;c__Alphaproteobacteria;o__Acetobacterales;f__Acetobacteraceae
OTU_1368	0	0	2	0	0	1	9	2	k__Bacteria;p__Proteobacteria;c__Gammaproteobacteria;o__Burkholderiales;f__Nitrosomonadaceae;g__MND1;s__	0	0	0	0	0	0	0	0	4	0	0	0	0	0	0	0	0	2	1	1	25	4	0	2	k__Bacteria;p__Proteobacteria;c__Gammaproteobacteria;o__Burkholderiales;f__Nitrosomonadaceae;g__MND1;s__
OTU_1369	0	0	0	3	1	0	0	0	k__Bacteria;p__Firmicutes;c__Clostridia;o__Lachnospirales;f__Lachnospiraceae;g__GCA-900066575;s__	0	0	0	0	0	0	0	0	0	8	0	0	1	0	0	0	0	0	0	0	0	0	0	0	k__Bacteria;p__Firmicutes;c__Clostridia;o__Lachnospirales;f__Lachnospiraceae;g__GCA-900066575;s__
OTU_1370	0	5	0	0	8	5	0	0	k__Bacteria	0	0	0	0	0	14	0	0	0	0	0	0	0	0	22	0	0	15	0	0	0	0	0	0	k__Bacteria
OTU_1371	12	0	14	19	10	2	1	1	k__Bacteria;p__Bacteroidota;c__Bacteroidia;o__Bacteroidales;f__Prevotellaceae;g__Prevotella;s__Prevotella_copri	1	1	32	0	0	0	19	18	3	32	14	11	21	3	5	0	4	2	1	0	0	0	0	2	k__Bacteria;p__Bacteroidota;c__Bacteroidia;o__Bacteroidales;f__Prevotellaceae;g__Prevotella;s__Prevotella_copri
OTU_1372	0	1	0	1	0	2	1	19	k__Bacteria;p__Bacteroidota;c__Bacteroidia;o__Cytophagales;f__Microscillaceae;g__Ohtaekwangia	0	0	0	0	1	0	0	0	0	0	1	0	0	0	0	0	0	4	2	1	0	15	25	16	k__Bacteria;p__Bacteroidota;c__Bacteroidia;o__Cytophagales;f__Microscillaceae;g__Ohtaekwangia
OTU_1373	0	0	1	0	0	0	7	1	k__Bacteria;p__Planctomycetota;c__Phycisphaerae;o__Tepidisphaerales;f__WD2101_soil_group;g__WD2101_soil_group;s__	0	0	0	0	0	0	0	0	2	0	0	0	0	0	0	0	0	0	0	0	20	0	0	3	k__Bacteria;p__Planctomycetota;c__Phycisphaerae;o__Tepidisphaerales;f__WD2101_soil_group;g__WD2101_soil_group;s__
OTU_1374	0	0	11	1	0	0	6	0	k__Bacteria;p__Desulfobacterota;c__Desulfobulbia;o__Desulfobulbales;f__Desulfobulbaceae;g__Desulfobulbus;s__Desulfobulbus_oligotrophicus	0	0	0	0	0	0	31	0	0	1	0	0	0	0	0	0	0	0	16	0	0	0	0	0	k__Bacteria;p__Desulfobacterota;c__Desulfobulbia;o__Desulfobulbales;f__Desulfobulbaceae;g__Desulfobulbus;s__Desulfobulbus_oligotrophicus
OTU_1375	1	0	0	0	0	0	2	7	k__Bacteria;p__Acidobacteriota;c__Blastocatellia;o__Blastocatellales;f__Blastocatellaceae;g__JGI_0001001-H03;s__	3	0	0	0	0	0	0	0	0	0	0	0	0	0	0	0	0	0	1	0	3	1	0	20	k__Bacteria;p__Acidobacteriota;c__Blastocatellia;o__Blastocatellales;f__Blastocatellaceae;g__JGI_0001001-H03;s__
OTU_1376	0	0	0	14	0	0	0	0	k__Bacteria;p__Bacteroidota;c__Bacteroidia;o__Flavobacteriales;f__NS9_marine_group;g__NS9_marine_group;s__	0	0	0	0	0	0	0	0	0	42	0	0	0	0	0	0	0	0	0	0	0	0	0	0	k__Bacteria;p__Bacteroidota;c__Bacteroidia;o__Flavobacteriales;f__NS9_marine_group;g__NS9_marine_group;s__
OTU_1377	1	0	4	1	0	1	19	6	k__Bacteria;p__Actinobacteriota;c__Thermoleophilia;o__Gaiellales;f__Gaiellaceae;g__Gaiella;s__	1	0	0	0	0	0	0	1	9	0	2	0	0	0	0	0	0	2	6	1	49	7	3	6	k__Bacteria;p__Actinobacteriota;c__Thermoleophilia;o__Gaiellales;f__Gaiellaceae;g__Gaiella;s__
OTU_1378	0	0	3	6	0	0	0	1	k__Bacteria;p__Patescibacteria;c__Saccharimonadia;o__Saccharimonadales;f__Saccharimonadales;g__Saccharimonadales;s__TM7_phylum	0	0	0	0	0	0	0	0	7	16	0	0	0	0	0	0	0	0	0	0	0	0	2	0	k__Bacteria;p__Patescibacteria;c__Saccharimonadia;o__Saccharimonadales;f__Saccharimonadales;g__Saccharimonadales;s__TM7_phylum
OTU_1379	0	0	3	0	0	0	5	2	k__Bacteria;p__Myxococcota;c__Polyangia;o__Polyangiales;f__Polyangiaceae;g__Pajaroellobacter;s__	0	0	0	0	0	0	7	0	0	0	0	0	0	0	0	0	0	0	13	0	1	0	3	3	k__Bacteria;p__Myxococcota;c__Polyangia;o__Polyangiales;f__Polyangiaceae;g__Pajaroellobacter;s__
OTU_1380	1	1	5	11	2	2	0	2	k__Bacteria;p__Firmicutes;c__Clostridia;o__Oscillospirales;f__Oscillospiraceae;g__UCG-002;s__	0	1	0	0	1	0	12	1	1	29	0	3	0	0	5	2	2	0	0	0	0	0	4	0	k__Bacteria;p__Firmicutes;c__Clostridia;o__Oscillospirales;f__Oscillospiraceae;g__UCG-002;s__
OTU_1381	1	10	0	1	0	2	0	3	k__Bacteria;p__Verrucomicrobiota;c__Chlamydiae;o__Chlamydiales;f__Simkaniaceae	2	0	1	0	29	0	0	0	0	1	0	0	0	0	0	2	0	3	0	0	0	0	6	2	k__Bacteria;p__Verrucomicrobiota;c__Chlamydiae;o__Chlamydiales;f__Simkaniaceae
OTU_1382	1	0	0	0	0	0	2	8	k__Bacteria;p__Proteobacteria;c__Gammaproteobacteria;o__Burkholderiales;f__Neisseriaceae;g__;s__Neisseriaceae_bacterium	2	0	0	0	0	0	0	0	0	0	0	0	0	0	0	0	0	0	0	0	5	2	18	3	k__Bacteria;p__Proteobacteria;c__Gammaproteobacteria;o__Burkholderiales;f__Neisseriaceae;g__;s__Neisseriaceae_bacterium
OTU_1383	1	0	1	0	0	0	8	0	k__Bacteria;p__Bacteroidota;c__Bacteroidia;o__Chitinophagales;f__Chitinophagaceae;g__Aurantisolimonas;s__	0	3	0	0	0	0	0	1	0	0	0	0	0	0	0	0	0	0	7	15	0	0	0	0	k__Bacteria;p__Bacteroidota;c__Bacteroidia;o__Chitinophagales;f__Chitinophagaceae;g__Aurantisolimonas;s__
OTU_1384	6	0	1	4	7	2	0	1	k__Bacteria;p__Firmicutes;c__Clostridia;o__Oscillospirales;f__Ruminococcaceae;g__Ruminococcus;s__Ruminococcus_bicirculans	0	0	16	0	0	0	1	0	0	12	0	0	20	0	1	0	5	0	0	0	0	0	3	0	k__Bacteria;p__Firmicutes;c__Clostridia;o__Oscillospirales;f__Ruminococcaceae;g__Ruminococcus;s__Ruminococcus_bicirculans
OTU_1385	0	0	0	0	4	5	0	0	k__Bacteria	0	0	0	0	0	0	0	0	0	0	0	0	2	0	9	5	9	0	0	0	0	0	0	0	k__Bacteria
OTU_1386	0	0	2	0	0	1	8	1	k__Bacteria;p__Actinobacteriota;c__Acidimicrobiia;o__;f__;g__;s__	0	0	0	0	0	0	0	0	5	0	0	0	0	0	0	0	0	1	3	1	18	0	0	3	k__Bacteria;p__Actinobacteriota;c__Acidimicrobiia;o__;f__;g__;s__
OTU_1387	7	7	6	1	3	2	18	11	k__Bacteria;p__Actinobacteriota;c__Acidimicrobiia;o__Microtrichales;f__Microtrichaceae;g__IMCC26207;s__	6	10	5	14	2	4	5	11	1	2	0	1	0	3	5	0	0	6	26	14	13	17	2	12	k__Bacteria;p__Actinobacteriota;c__Acidimicrobiia;o__Microtrichales;f__Microtrichaceae;g__IMCC26207;s__
OTU_1388	3	0	1	1	3	0	0	0	k__Bacteria;p__Firmicutes;c__Bacilli;o__Erysipelotrichales;f__Erysipelatoclostridiaceae;g__Catenibacterium;s__	0	0	7	0	0	0	0	2	0	2	0	1	9	0	0	0	0	0	0	0	0	0	0	0	k__Bacteria;p__Firmicutes;c__Bacilli;o__Erysipelotrichales;f__Erysipelatoclostridiaceae;g__Catenibacterium;s__
OTU_1389	0	1	0	0	0	0	4	3	k__Bacteria;p__Planctomycetota;c__Planctomycetes;o__Planctomycetales;f__Rubinisphaeraceae;g__SH-PL14;s__Planctomyces_sp.	0	0	0	0	2	0	0	0	0	0	0	0	0	0	0	0	0	0	10	0	2	0	2	5	k__Bacteria;p__Planctomycetota;c__Planctomycetes;o__Planctomycetales;f__Rubinisphaeraceae;g__SH-PL14;s__Planctomyces_sp.
OTU_1390	0	0	2	0	0	0	8	7	k__Bacteria;p__Chloroflexi;c__Dehalococcoidia;o__S085;f__S085;g__S085;s__	0	0	0	0	0	0	0	0	5	0	0	0	0	0	0	0	0	0	2	1	19	13	3	4	k__Bacteria;p__Chloroflexi;c__Dehalococcoidia;o__S085;f__S085;g__S085;s__
OTU_1391	0	3	0	1	0	5	0	0	k__Bacteria;p__Firmicutes;c__Clostridia;o__Peptostreptococcales-Tissierellales;f__Peptostreptococcales-Tissierellales;g__Tissierella;s__	0	0	0	0	0	9	0	0	0	0	0	1	0	0	0	0	15	0	0	0	0	0	0	0	k__Bacteria;p__Firmicutes;c__Clostridia;o__Peptostreptococcales-Tissierellales;f__Peptostreptococcales-Tissierellales;g__Tissierella;s__
OTU_1392	0	0	0	13	0	0	0	0	k__Bacteria;p__Bacteroidota;c__Bacteroidia;o__Bacteroidales;f__Muribaculaceae;g__Muribaculaceae;s__	0	0	0	0	0	0	0	0	0	39	0	0	0	0	0	0	0	0	0	0	0	0	0	0	k__Bacteria;p__Bacteroidota;c__Bacteroidia;o__Bacteroidales;f__Muribaculaceae;g__Muribaculaceae;s__
OTU_1393	4	0	0	0	6	0	1	0	k__Bacteria;p__Firmicutes;c__Sulfobacillia;o__Sulfobacillales;f__Sulfobacillaceae;g__;s__	0	0	10	0	0	0	0	0	0	0	0	0	17	0	0	0	0	0	0	0	1	0	0	0	k__Bacteria;p__Firmicutes;c__Sulfobacillia;o__Sulfobacillales;f__Sulfobacillaceae;g__;s__
OTU_1394	0	1	0	0	7	7	0	0	k__Bacteria	0	0	0	0	1	0	0	0	0	0	0	0	15	0	6	21	0	0	0	0	0	0	0	0	k__Bacteria
OTU_1395	0	1	0	0	0	0	0	18	k__Bacteria;p__Bacteroidota;c__Bacteroidia;o__Flavobacteriales;f__NS9_marine_group;g__NS9_marine_group;s__	0	0	0	1	0	0	0	0	0	0	0	0	0	0	0	0	0	0	0	0	0	54	0	0	k__Bacteria;p__Bacteroidota;c__Bacteroidia;o__Flavobacteriales;f__NS9_marine_group;g__NS9_marine_group;s__
OTU_1396	0	0	2	14	1	1	0	0	k__Bacteria;p__Patescibacteria;c__Saccharimonadia;o__Saccharimonadales;f__Saccharimonadaceae;g__Candidatus_Saccharimonas;s__	0	0	0	0	0	0	5	0	0	31	10	0	1	0	0	0	2	0	0	0	0	0	0	0	k__Bacteria;p__Patescibacteria;c__Saccharimonadia;o__Saccharimonadales;f__Saccharimonadaceae;g__Candidatus_Saccharimonas;s__
OTU_1397	0	0	0	0	11	0	0	0	Unknown	0	0	0	0	0	0	0	0	0	0	0	0	0	0	33	0	0	0	0	0	0	0	0	0	Unknown
OTU_1398	0	0	0	0	0	0	0	11	k__Bacteria;p__Proteobacteria;c__Gammaproteobacteria;o__Ectothiorhodospirales;f__Thioalkalispiraceae;g__;s__	0	0	0	0	0	0	0	0	0	0	0	0	0	0	0	0	0	0	0	0	0	31	0	1	k__Bacteria;p__Proteobacteria;c__Gammaproteobacteria;o__Ectothiorhodospirales;f__Thioalkalispiraceae;g__;s__
OTU_1399	0	0	0	1	0	1	0	13	k__Bacteria;p__Firmicutes;c__Clostridia;o__Peptostreptococcales-Tissierellales;f__Peptostreptococcaceae;g__Peptostreptococcus;s__	0	0	0	0	0	0	0	0	0	2	0	0	0	0	0	0	1	0	0	0	0	37	0	0	k__Bacteria;p__Firmicutes;c__Clostridia;o__Peptostreptococcales-Tissierellales;f__Peptostreptococcaceae;g__Peptostreptococcus;s__
OTU_1400	0	0	0	5	0	0	0	0	k__Bacteria;p__Firmicutes;c__Clostridia;o__Oscillospirales;f__Ruminococcaceae;g__Anaerotruncus;s__Anaerotruncus_colihominis	0	0	0	0	0	0	0	0	0	14	0	0	0	0	0	0	0	0	0	0	0	0	0	0	k__Bacteria;p__Firmicutes;c__Clostridia;o__Oscillospirales;f__Ruminococcaceae;g__Anaerotruncus;s__Anaerotruncus_colihominis
OTU_1401	0	0	0	11	0	0	0	0	k__Bacteria;p__Firmicutes;c__Negativicutes;o__Veillonellales-Selenomonadales;f__Selenomonadaceae;g__Quinella;s__	0	0	0	0	0	0	0	0	0	31	0	0	0	0	0	0	0	0	0	0	0	0	0	0	k__Bacteria;p__Firmicutes;c__Negativicutes;o__Veillonellales-Selenomonadales;f__Selenomonadaceae;g__Quinella;s__
OTU_1402	4	6	0	1	0	1	0	5	k__Bacteria;p__Proteobacteria;c__Gammaproteobacteria;o__Burkholderiales	4	7	0	0	18	0	0	0	0	2	0	0	0	0	0	1	0	0	0	0	0	0	10	3	k__Bacteria;p__Proteobacteria;c__Gammaproteobacteria;o__Burkholderiales
OTU_1403	1	0	7	0	1	0	2	0	k__Bacteria;p__Proteobacteria;c__Gammaproteobacteria;o__Burkholderiales;f__Hydrogenophilaceae;g__Thiobacillus;s__	1	0	0	0	0	0	19	0	0	0	0	0	0	1	0	0	0	0	6	0	0	0	0	0	k__Bacteria;p__Proteobacteria;c__Gammaproteobacteria;o__Burkholderiales;f__Hydrogenophilaceae;g__Thiobacillus;s__
OTU_1404	0	0	1	0	0	0	1	13	k__Bacteria;p__Proteobacteria;c__Gammaproteobacteria;o__CCM19a;f__CCM19a;g__CCM19a;s__	0	0	0	0	0	0	0	0	2	0	0	0	0	0	0	0	0	0	0	0	1	38	0	0	k__Bacteria;p__Proteobacteria;c__Gammaproteobacteria;o__CCM19a;f__CCM19a;g__CCM19a;s__
OTU_1405	1	0	2	1	0	1	5	14	k__Bacteria;p__Proteobacteria;c__Alphaproteobacteria;o__Reyranellales;f__Reyranellaceae;g__;s__	2	0	0	0	0	0	4	0	1	0	1	0	0	0	0	1	0	0	6	0	7	38	0	3	k__Bacteria;p__Proteobacteria;c__Alphaproteobacteria;o__Reyranellales;f__Reyranellaceae;g__;s__
OTU_1406	0	0	3	0	0	1	9	1	k__Bacteria;p__Proteobacteria;c__Gammaproteobacteria;o__Burkholderiales;f__Nitrosomonadaceae;g__Nitrosomonas;s__Nitrosomonas_oligotropha	0	0	0	0	0	0	0	0	9	0	0	0	0	0	0	0	0	1	1	0	25	0	1	2	k__Bacteria;p__Proteobacteria;c__Gammaproteobacteria;o__Burkholderiales;f__Nitrosomonadaceae;g__Nitrosomonas;s__Nitrosomonas_oligotropha
OTU_1407	0	0	2	0	0	0	16	0	k__Bacteria;p__Bacteroidota;c__Bacteroidia;o__Cytophagales	0	0	0	0	0	0	0	0	4	0	0	0	0	0	0	0	0	0	1	0	46	0	0	0	k__Bacteria;p__Bacteroidota;c__Bacteroidia;o__Cytophagales
OTU_1408	0	0	2	8	0	0	0	0	k__Bacteria	0	0	0	0	0	0	0	4	0	20	0	4	0	0	0	0	0	0	0	0	0	0	0	0	k__Bacteria
OTU_1409	0	0	4	0	0	0	3	0	k__Bacteria;p__Desulfobacterota;c__Syntrophia;o__Syntrophales;f__;g__;s__	0	0	0	0	0	0	12	0	0	0	0	0	0	0	0	0	0	0	8	0	0	0	0	0	k__Bacteria;p__Desulfobacterota;c__Syntrophia;o__Syntrophales;f__;g__;s__
OTU_1410	0	0	1	0	0	0	11	1	k__Bacteria;p__Bacteroidota;c__Bacteroidia;o__Sphingobacteriales	0	0	0	0	0	0	3	0	0	0	0	0	0	0	0	0	0	0	31	0	0	0	0	2	k__Bacteria;p__Bacteroidota;c__Bacteroidia;o__Sphingobacteriales
OTU_1411	1	0	0	0	1	0	0	1	k__Bacteria;p__Bdellovibrionota;c__Oligoflexia;o__0319-6G20;f__0319-6G20;g__0319-6G20;s__	0	1	1	0	0	0	0	0	0	0	0	0	0	1	0	0	0	0	0	0	0	0	0	2	k__Bacteria;p__Bdellovibrionota;c__Oligoflexia;o__0319-6G20;f__0319-6G20;g__0319-6G20;s__
OTU_1412	0	0	0	0	0	9	0	0	k__Bacteria	0	0	0	0	0	0	0	0	0	0	0	0	0	0	0	25	0	0	0	0	0	0	0	0	k__Bacteria
OTU_1413	0	0	3	0	0	1	6	2	k__Bacteria;p__Proteobacteria;c__Gammaproteobacteria;o__Pseudomonadales;f__Moraxellaceae;g__Fluviicoccus;s__	0	0	0	0	0	0	0	0	7	0	0	0	0	0	0	0	0	3	1	0	16	0	1	4	k__Bacteria;p__Proteobacteria;c__Gammaproteobacteria;o__Pseudomonadales;f__Moraxellaceae;g__Fluviicoccus;s__
OTU_1414	0	4	8	0	0	4	4	0	k__Bacteria;p__Bacteroidota;c__Bacteroidia;o__Bacteroidales;f__Rikenellaceae;g__DMER64;s__	0	0	0	0	0	10	22	0	0	0	0	0	0	0	0	0	10	0	10	0	0	0	0	0	k__Bacteria;p__Bacteroidota;c__Bacteroidia;o__Bacteroidales;f__Rikenellaceae;g__DMER64;s__
OTU_1415	1	2	0	0	1	11	1	1	k__Bacteria	0	1	0	0	0	5	0	0	0	0	0	0	0	0	1	0	1	31	1	0	0	0	0	1	k__Bacteria
OTU_1416	0	5	6	1	0	3	1	0	k__Bacteria;p__Bacteroidota;c__Bacteroidia;o__Bacteroidales;f__Dysgonomonadaceae;g__Proteiniphilum;s__	0	0	0	0	0	13	18	0	0	0	0	1	0	0	0	0	8	0	3	0	0	0	0	0	k__Bacteria;p__Bacteroidota;c__Bacteroidia;o__Bacteroidales;f__Dysgonomonadaceae;g__Proteiniphilum;s__
OTU_1417	0	0	0	0	10	1	0	0	Unknown	0	0	0	0	0	0	0	0	0	0	0	0	0	29	0	0	2	0	0	0	0	0	0	0	Unknown
OTU_1418	11	8	1	5	1	6	3	13	k__Bacteria;p__Firmicutes;c__Bacilli;o__Bacillales;f__Bacillaceae;g__Bacillus	5	20	7	0	15	7	2	0	0	8	2	3	2	0	0	4	14	0	2	5	0	0	31	6	k__Bacteria;p__Firmicutes;c__Bacilli;o__Bacillales;f__Bacillaceae;g__Bacillus
OTU_1419	4	1	0	5	0	4	1	0	k__Bacteria;p__Firmicutes;c__Clostridia;o__Peptostreptococcales-Tissierellales;f__Peptostreptococcales-Tissierellales;g__Natronincola;s__	0	12	0	0	0	3	0	0	0	0	0	13	0	0	0	0	10	0	1	0	0	0	0	0	k__Bacteria;p__Firmicutes;c__Clostridia;o__Peptostreptococcales-Tissierellales;f__Peptostreptococcales-Tissierellales;g__Natronincola;s__
OTU_1420	1	0	0	0	1	0	0	0	k__Bacteria;p__Bacteroidota;c__Bacteroidia;o__Flavobacteriales;f__Flavobacteriaceae;g__Flavobacterium	2	0	0	0	0	0	0	0	0	0	0	0	0	2	0	0	0	0	0	0	0	0	0	0	k__Bacteria;p__Bacteroidota;c__Bacteroidia;o__Flavobacteriales;f__Flavobacteriaceae;g__Flavobacterium
OTU_1421	3	0	2	0	5	0	0	1	k__Bacteria;p__Firmicutes;c__Clostridia;o__Peptostreptococcales-Tissierellales;f__Peptostreptococcales-Tissierellales;g__Parvimonas	5	0	2	0	0	0	2	0	2	0	0	0	13	0	0	0	0	0	0	0	0	1	0	0	k__Bacteria;p__Firmicutes;c__Clostridia;o__Peptostreptococcales-Tissierellales;f__Peptostreptococcales-Tissierellales;g__Parvimonas
OTU_1422	8	0	2	2	0	0	0	0	Unknown	5	14	3	0	0	0	1	3	0	1	4	1	0	0	0	0	0	0	0	0	0	0	0	0	Unknown
OTU_1423	0	0	0	0	0	1	0	0	Unknown	0	0	0	0	0	0	0	0	0	0	0	0	0	0	0	0	0	2	0	0	0	0	0	0	Unknown
OTU_1424	0	0	1	8	1	0	0	1	k__Bacteria;p__Bacteroidota;c__Bacteroidia;o__Bacteroidales;f__Barnesiellaceae;g__Barnesiella;s__	0	0	0	0	0	0	1	0	0	23	0	0	0	1	0	0	0	0	0	0	0	0	1	0	k__Bacteria;p__Bacteroidota;c__Bacteroidia;o__Bacteroidales;f__Barnesiellaceae;g__Barnesiella;s__
OTU_1425	0	2	0	0	1	11	0	0	Unknown	0	0	0	0	0	4	0	0	0	0	0	0	0	0	2	0	0	32	0	0	0	0	0	0	Unknown
OTU_1426	0	0	0	6	0	0	0	0	k__Bacteria	0	0	0	0	0	0	0	0	0	18	0	0	0	0	0	0	0	0	0	0	0	0	0	0	k__Bacteria
OTU_1427	0	0	10	0	0	0	4	0	k__Bacteria;p__Bacteroidota;c__Bacteroidia;o__Bacteroidales;f__Prolixibacteraceae;g__Mariniphaga;s__	0	0	0	0	0	0	28	0	0	0	0	0	0	0	0	0	0	0	10	0	0	0	0	0	k__Bacteria;p__Bacteroidota;c__Bacteroidia;o__Bacteroidales;f__Prolixibacteraceae;g__Mariniphaga;s__
OTU_1428	0	0	2	2	0	0	5	2	k__Bacteria;p__Proteobacteria;c__Gammaproteobacteria;o__Salinisphaerales;f__Solimonadaceae;g__Panacagrimonas;s__	0	0	0	0	0	0	0	0	4	6	0	0	0	0	0	0	0	0	0	0	14	0	1	4	k__Bacteria;p__Proteobacteria;c__Gammaproteobacteria;o__Salinisphaerales;f__Solimonadaceae;g__Panacagrimonas;s__
OTU_1429	2	10	0	1	0	0	0	0	k__Bacteria;p__Cyanobacteria;c__Cyanobacteriia;o__Chloroplast;f__Chloroplast;g__Chloroplast	1	3	2	1	27	0	0	0	0	0	0	1	0	0	0	0	0	0	0	0	0	0	0	0	k__Bacteria;p__Cyanobacteria;c__Cyanobacteriia;o__Chloroplast;f__Chloroplast;g__Chloroplast
OTU_1430	3	1	2	1	3	1	1	6	k__Bacteria;p__Firmicutes;c__Clostridia;o__Christensenellales;f__Christensenellaceae;g__;s__	4	5	0	0	0	3	6	0	0	3	0	0	0	7	0	0	0	1	0	1	1	0	14	4	k__Bacteria;p__Firmicutes;c__Clostridia;o__Christensenellales;f__Christensenellaceae;g__;s__
OTU_1431	0	2	0	0	8	4	0	0	k__Bacteria	0	0	0	3	0	1	0	0	0	0	0	0	24	0	0	7	0	5	0	0	0	0	0	0	k__Bacteria
OTU_1432	1	0	1	1	0	0	1	11	k__Bacteria;p__Verrucomicrobiota;c__Verrucomicrobiae;o__Verrucomicrobiales;f__Verrucomicrobiaceae;g__;s__	2	0	0	0	0	0	0	0	1	0	1	0	0	0	0	0	0	0	0	0	3	0	9	22	k__Bacteria;p__Verrucomicrobiota;c__Verrucomicrobiae;o__Verrucomicrobiales;f__Verrucomicrobiaceae;g__;s__
OTU_1433	0	0	4	0	0	1	4	0	k__Bacteria;p__Firmicutes;c__Clostridia;o__Oscillospirales;f__Oscillospiraceae	0	0	0	0	0	0	12	0	0	0	0	0	0	0	0	0	2	0	12	0	0	0	0	0	k__Bacteria;p__Firmicutes;c__Clostridia;o__Oscillospirales;f__Oscillospiraceae
OTU_1434	4	0	0	0	3	0	0	0	k__Bacteria;p__Firmicutes;c__Clostridia;o__Lachnospirales;f__Lachnospiraceae;g__Anaerostipes	0	0	10	0	0	0	0	0	0	0	0	0	8	0	0	0	0	0	0	0	0	0	0	0	k__Bacteria;p__Firmicutes;c__Clostridia;o__Lachnospirales;f__Lachnospiraceae;g__Anaerostipes
OTU_1435	0	2	0	0	4	6	0	0	Unknown	0	0	0	0	4	0	0	0	0	0	0	0	0	11	0	1	16	0	0	0	0	0	0	0	Unknown
OTU_1436	1	0	0	3	0	2	2	11	k__Bacteria;p__Firmicutes;c__Clostridia;o__Lachnospirales;f__;g__;s__	3	0	0	0	0	0	0	0	0	7	1	0	0	0	0	0	0	4	3	0	1	0	30	3	k__Bacteria;p__Firmicutes;c__Clostridia;o__Lachnospirales;f__;g__;s__
OTU_1437	0	0	9	0	0	0	3	0	k__Bacteria;p__Desulfobacterota;c__Syntrophorhabdia;o__Syntrophorhabdales;f__Syntrophorhabdaceae;g__Syntrophorhabdus;s__	0	0	0	0	0	0	27	0	0	0	0	0	0	0	0	0	0	0	9	0	0	0	0	0	k__Bacteria;p__Desulfobacterota;c__Syntrophorhabdia;o__Syntrophorhabdales;f__Syntrophorhabdaceae;g__Syntrophorhabdus;s__
OTU_1438	0	3	0	0	6	1	0	0	k__Bacteria	0	0	0	0	0	7	0	0	0	0	0	0	0	0	16	0	0	3	0	0	0	0	0	0	k__Bacteria
OTU_1439	0	1	2	0	1	0	6	5	k__Bacteria;p__Proteobacteria;c__Gammaproteobacteria;o__Burkholderiales;f__Sutterellaceae;g__	0	0	0	3	0	0	0	0	5	0	0	0	0	0	1	0	0	0	1	2	14	13	0	0	k__Bacteria;p__Proteobacteria;c__Gammaproteobacteria;o__Burkholderiales;f__Sutterellaceae;g__
OTU_1440	3	13	2	0	0	3	0	0	k__Bacteria;p__Firmicutes;c__Bacilli;o__Paenibacillales;f__Paenibacillaceae;g__Paenibacillus	4	3	0	4	1	33	0	2	3	0	0	0	0	0	0	1	7	0	0	0	0	0	0	0	k__Bacteria;p__Firmicutes;c__Bacilli;o__Paenibacillales;f__Paenibacillaceae;g__Paenibacillus
OTU_1441	0	0	1	0	0	0	18	1	k__Bacteria;p__Planctomycetota;c__Planctomycetes;o__Planctomycetales;f__;g__;s__	0	0	0	0	0	0	0	0	2	0	0	0	0	0	0	0	0	0	4	0	48	0	0	1	k__Bacteria;p__Planctomycetota;c__Planctomycetes;o__Planctomycetales;f__;g__;s__
OTU_1442	0	0	0	12	0	0	0	0	k__Bacteria;p__Marinimicrobia_(SAR406_clade);c__Marinimicrobia_(SAR406_clade);o__Marinimicrobia_(SAR406_clade);f__Marinimicrobia_(SAR406_clade);g__Marinimicrobia_(SAR406_clade);s__	0	0	0	0	0	0	0	0	0	36	0	0	0	0	0	0	0	0	0	0	0	0	0	0	k__Bacteria;p__Marinimicrobia_(SAR406_clade);c__Marinimicrobia_(SAR406_clade);o__Marinimicrobia_(SAR406_clade);f__Marinimicrobia_(SAR406_clade);g__Marinimicrobia_(SAR406_clade);s__
OTU_1443	1	8	0	0	1	0	0	1	k__Bacteria;p__Bacteroidota;c__Bacteroidia;o__Chitinophagales;f__Chitinophagaceae;g__Edaphobaculum	1	2	0	18	2	3	0	0	0	0	0	0	0	0	3	0	0	0	0	0	0	3	0	0	k__Bacteria;p__Bacteroidota;c__Bacteroidia;o__Chitinophagales;f__Chitinophagaceae;g__Edaphobaculum
OTU_1444	0	0	0	11	1	1	0	0	k__Bacteria;p__Firmicutes;c__Clostridia;o__Lachnospirales;f__Lachnospiraceae;g__GCA-900066755;s__	0	0	0	0	0	0	0	0	0	33	0	0	0	0	1	0	1	0	0	0	0	0	0	0	k__Bacteria;p__Firmicutes;c__Clostridia;o__Lachnospirales;f__Lachnospiraceae;g__GCA-900066755;s__
OTU_1445	0	0	2	0	0	0	7	4	k__Bacteria;p__Acidobacteriota;c__Acidobacteriae;o__Bryobacterales;f__Bryobacteraceae;g__Bryobacter;s__	0	0	0	0	0	0	4	0	0	0	0	0	0	0	0	0	0	0	18	1	0	6	2	3	k__Bacteria;p__Acidobacteriota;c__Acidobacteriae;o__Bryobacterales;f__Bryobacteraceae;g__Bryobacter;s__
OTU_1446	3	0	0	1	3	0	0	0	k__Bacteria;p__Actinobacteriota;c__Rubrobacteria;o__Rubrobacterales;f__Rubrobacteriaceae;g__Rubrobacter;s__Rubrobacter_radiotolerans	0	0	9	0	0	0	0	0	0	0	0	1	9	0	0	0	0	0	0	0	0	0	0	0	k__Bacteria;p__Actinobacteriota;c__Rubrobacteria;o__Rubrobacterales;f__Rubrobacteriaceae;g__Rubrobacter;s__Rubrobacter_radiotolerans
OTU_1447	1	4	2	1	1	2	0	3	k__Bacteria;p__Firmicutes;c__Bacilli;o__Alicyclobacillales;f__Alicyclobacillaceae;g__Tumebacillus;s__	0	3	0	11	1	0	0	4	0	2	1	0	0	0	3	1	0	3	0	0	0	0	6	1	k__Bacteria;p__Firmicutes;c__Bacilli;o__Alicyclobacillales;f__Alicyclobacillaceae;g__Tumebacillus;s__
OTU_1448	4	0	5	1	0	0	0	0	k__Bacteria	5	7	0	0	0	0	7	5	1	1	0	0	0	0	0	0	0	0	0	0	0	0	0	0	k__Bacteria
OTU_1449	9	3	1	0	1	0	0	1	k__Bacteria;p__Proteobacteria;c__Alphaproteobacteria;o__Rhodospirillales;f__;g__;s__	3	0	24	0	6	2	0	0	1	0	0	0	2	0	1	0	0	0	0	0	0	0	0	1	k__Bacteria;p__Proteobacteria;c__Alphaproteobacteria;o__Rhodospirillales;f__;g__;s__
OTU_1450	0	1	1	0	11	8	0	0	k__Bacteria	0	0	0	1	0	0	0	0	1	0	0	0	4	0	29	23	1	0	0	0	0	0	0	0	k__Bacteria
OTU_1451	8	1	0	0	0	1	4	3	k__Bacteria;p__Bacteroidota;c__Bacteroidia;o__Cytophagales;f__Spirosomaceae;g__Spirosoma;s__Spirosoma_panaciterrae	7	16	0	0	0	1	0	0	0	0	0	0	0	0	0	0	0	3	10	0	0	2	0	5	k__Bacteria;p__Bacteroidota;c__Bacteroidia;o__Cytophagales;f__Spirosomaceae;g__Spirosoma;s__Spirosoma_panaciterrae
OTU_1452	4	0	1	7	5	1	0	0	k__Bacteria;p__Firmicutes;c__Clostridia;o__Oscillospirales;f__Ruminococcaceae;g__UBA1819;s__	1	2	9	0	0	0	1	0	0	18	0	2	13	1	0	0	1	0	0	0	0	0	0	0	k__Bacteria;p__Firmicutes;c__Clostridia;o__Oscillospirales;f__Ruminococcaceae;g__UBA1819;s__
OTU_1453	0	0	0	7	0	0	0	0	k__Bacteria;p__Proteobacteria;c__Alphaproteobacteria;o__Puniceispirillales;f__SAR116_clade;g__SAR116_clade;s__	0	0	0	0	0	0	0	0	0	20	0	0	0	0	0	0	0	0	0	0	0	0	0	0	k__Bacteria;p__Proteobacteria;c__Alphaproteobacteria;o__Puniceispirillales;f__SAR116_clade;g__SAR116_clade;s__
OTU_1454	0	1	4	0	0	1	5	1	k__Bacteria;p__Proteobacteria;c__Gammaproteobacteria;o__Legionellales;f__Legionellaceae;g__Legionella;s__Legionella_sp.	0	0	0	0	0	3	0	0	11	0	0	0	0	0	0	0	0	3	1	0	13	0	0	1	k__Bacteria;p__Proteobacteria;c__Gammaproteobacteria;o__Legionellales;f__Legionellaceae;g__Legionella;s__Legionella_sp.
OTU_1455	0	0	3	0	0	0	5	0	k__Bacteria;p__Proteobacteria;c__Gammaproteobacteria;o__Diplorickettsiales;f__Diplorickettsiaceae;g__;s__	0	0	0	0	0	0	0	0	8	0	0	0	0	0	0	0	0	0	3	0	11	0	0	0	k__Bacteria;p__Proteobacteria;c__Gammaproteobacteria;o__Diplorickettsiales;f__Diplorickettsiaceae;g__;s__
OTU_1456	1	0	3	0	0	0	20	3	k__Bacteria;p__Patescibacteria;c__Saccharimonadia;o__Saccharimonadales;f__Saccharimonadales;g__Saccharimonadales;s__	0	1	0	0	0	0	2	6	0	0	0	0	0	0	0	0	0	0	19	37	2	0	2	6	k__Bacteria;p__Patescibacteria;c__Saccharimonadia;o__Saccharimonadales;f__Saccharimonadales;g__Saccharimonadales;s__
OTU_1457	1	0	0	15	1	0	0	0	k__Bacteria;p__Bacteroidota;c__Bacteroidia;o__Bacteroidales;f__Muribaculaceae;g__Muribaculaceae;s__	0	3	0	0	0	0	0	0	0	45	0	0	0	1	1	0	0	0	0	0	0	0	0	0	k__Bacteria;p__Bacteroidota;c__Bacteroidia;o__Bacteroidales;f__Muribaculaceae;g__Muribaculaceae;s__
OTU_1458	1	1	0	1	0	1	2	18	k__Bacteria;p__Cyanobacteria;c__Cyanobacteriia;o__Leptolyngbyales;f__Leptolyngbyaceae;g__Leptolyngbya_PCC-6306	3	0	0	0	2	0	0	0	0	1	0	0	0	0	0	1	0	0	3	0	3	0	49	5	k__Bacteria;p__Cyanobacteria;c__Cyanobacteriia;o__Leptolyngbyales;f__Leptolyngbyaceae;g__Leptolyngbya_PCC-6306
OTU_1459	0	0	7	0	0	0	2	0	k__Bacteria;p__Patescibacteria;c__Dojkabacteria;o__Dojkabacteria;f__Dojkabacteria;g__Dojkabacteria;s__	0	0	0	0	0	0	21	0	0	0	0	0	0	0	0	0	0	0	4	0	0	0	0	0	k__Bacteria;p__Patescibacteria;c__Dojkabacteria;o__Dojkabacteria;f__Dojkabacteria;g__Dojkabacteria;s__
OTU_1460	1	2	0	0	0	0	0	0	k__Bacteria;p__Chloroflexi;c__Anaerolineae;o__Anaerolineales;f__Anaerolineaceae;g__Leptolinea;s__	1	0	0	3	1	2	0	0	0	0	0	0	0	0	0	0	0	0	0	0	0	0	0	0	k__Bacteria;p__Chloroflexi;c__Anaerolineae;o__Anaerolineales;f__Anaerolineaceae;g__Leptolinea;s__
OTU_1461	0	0	2	6	0	0	0	0	Unknown	0	0	0	0	0	0	3	2	0	12	6	0	0	0	0	0	0	0	0	0	0	0	0	0	Unknown
OTU_1462	2	0	1	0	0	0	6	0	k__Bacteria;p__Bacteroidota;c__Bacteroidia;o__Cytophagales;f__Microscillaceae;g__Thermoflexibacter	0	0	4	0	0	0	0	0	3	0	0	0	0	0	0	0	0	0	2	0	14	0	0	0	k__Bacteria;p__Bacteroidota;c__Bacteroidia;o__Cytophagales;f__Microscillaceae;g__Thermoflexibacter
OTU_1463	1	0	3	8	0	3	0	1	k__Bacteria;p__Firmicutes;c__Clostridia;o__Lachnospirales;f__Lachnospiraceae;g__Lachnospiraceae_ND3007_group;s__	1	0	0	0	0	0	1	4	3	19	2	1	0	0	0	0	7	0	0	0	0	0	3	0	k__Bacteria;p__Firmicutes;c__Clostridia;o__Lachnospirales;f__Lachnospiraceae;g__Lachnospiraceae_ND3007_group;s__
OTU_1464	6	0	4	12	13	2	0	1	k__Bacteria;p__Firmicutes;c__Clostridia;o__Lachnospirales;f__Lachnospiraceae;g__Eubacterium_eligens_group	3	2	13	0	0	0	3	7	2	32	2	2	32	4	2	3	2	0	0	0	0	0	1	0	k__Bacteria;p__Firmicutes;c__Clostridia;o__Lachnospirales;f__Lachnospiraceae;g__Eubacterium_eligens_group
OTU_1465	1	0	1	2	0	0	3	3	k__Bacteria;p__Proteobacteria;c__Alphaproteobacteria;o__Rhizobiales;f__Hyphomicrobiaceae;g__;s__	1	0	0	0	0	0	0	0	1	2	2	0	0	0	0	0	0	0	3	1	4	3	0	5	k__Bacteria;p__Proteobacteria;c__Alphaproteobacteria;o__Rhizobiales;f__Hyphomicrobiaceae;g__;s__
OTU_1466	358	98	9	18	4	4	91	66	k__Bacteria;p__Proteobacteria;c__Gammaproteobacteria;o__Burkholderiales;f__Comamonadaceae	738	298	37	94	159	41	9	1	17	2	38	13	3	3	5	8	1	3	73	20	178	83	14	101	k__Bacteria;p__Proteobacteria;c__Gammaproteobacteria;o__Burkholderiales;f__Comamonadaceae
OTU_1467	0	0	5	0	0	2	4	2	k__Bacteria;p__Acidobacteriota;c__Blastocatellia;o__11-24;f__11-24;g__11-24;s__	0	0	0	0	0	0	12	0	1	0	0	0	0	0	0	0	0	6	10	0	2	0	1	5	k__Bacteria;p__Acidobacteriota;c__Blastocatellia;o__11-24;f__11-24;g__11-24;s__
OTU_1468	1	0	2	0	0	0	6	9	k__Bacteria;p__Chloroflexi;c__Anaerolineae;o__Caldilineales;f__Caldilineaceae;g__;s__	3	0	0	0	0	0	0	0	4	0	0	0	0	0	0	0	0	0	0	0	18	20	2	5	k__Bacteria;p__Chloroflexi;c__Anaerolineae;o__Caldilineales;f__Caldilineaceae;g__;s__
OTU_1469	2	2	2	1	1	1	37	34	k__Bacteria;p__Verrucomicrobiota;c__Verrucomicrobiae;o__Verrucomicrobiales;f__Verrucomicrobiaceae;g__;s__	4	2	0	1	0	4	5	0	1	0	1	0	2	0	0	0	0	1	79	9	22	60	11	30	k__Bacteria;p__Verrucomicrobiota;c__Verrucomicrobiae;o__Verrucomicrobiales;f__Verrucomicrobiaceae;g__;s__
OTU_1470	1	0	5	4	1	0	0	0	k__Bacteria;p__Firmicutes;c__Bacilli;o__Staphylococcales;f__Staphylococcaceae;g__Jeotgalicoccus;s__	1	1	0	0	0	0	6	6	1	1	9	1	0	0	2	0	0	0	0	0	0	0	0	0	k__Bacteria;p__Firmicutes;c__Bacilli;o__Staphylococcales;f__Staphylococcaceae;g__Jeotgalicoccus;s__
OTU_1471	1	1	0	0	0	0	3	9	k__Bacteria;p__Cyanobacteria;c__Cyanobacteriia;o__Chloroplast;f__Chloroplast;g__Chloroplast;s__Neochloris_aquatica	1	1	0	0	0	2	0	0	0	0	0	0	0	0	0	0	0	0	3	4	1	0	2	23	k__Bacteria;p__Cyanobacteria;c__Cyanobacteriia;o__Chloroplast;f__Chloroplast;g__Chloroplast;s__Neochloris_aquatica
OTU_1472	0	0	1	2	2	1	2	16	k__Bacteria;p__Firmicutes;c__Clostridia;o__Clostridia;f__Hungateiclostridiaceae;g__Anaerobacterium;s__	0	0	0	0	0	0	2	0	0	5	0	0	0	0	4	1	0	2	1	4	0	5	34	8	k__Bacteria;p__Firmicutes;c__Clostridia;o__Clostridia;f__Hungateiclostridiaceae;g__Anaerobacterium;s__
OTU_1473	10	1	0	0	0	0	0	0	k__Bacteria;p__Bacteroidota;c__Bacteroidia;o__Cytophagales;f__Spirosomaceae;g__Flectobacillus	1	0	29	0	0	2	0	0	0	0	0	0	0	0	0	0	0	0	0	0	0	0	0	0	k__Bacteria;p__Bacteroidota;c__Bacteroidia;o__Cytophagales;f__Spirosomaceae;g__Flectobacillus
OTU_1474	0	0	1	0	0	0	12	5	k__Bacteria;p__Chloroflexi;c__Chloroflexia;o__Chloroflexales;f__Roseiflexaceae;g__	0	0	0	0	0	0	0	0	3	0	0	0	0	0	0	0	0	0	2	2	32	2	4	8	k__Bacteria;p__Chloroflexi;c__Chloroflexia;o__Chloroflexales;f__Roseiflexaceae;g__
OTU_1475	0	0	0	0	0	0	0	14	k__Bacteria;p__SAR324_clade(Marine_group_B);c__SAR324_clade(Marine_group_B);o__SAR324_clade(Marine_group_B);f__SAR324_clade(Marine_group_B);g__SAR324_clade(Marine_group_B);s__	0	0	0	0	0	0	0	0	0	0	0	0	0	0	0	0	0	0	0	0	0	41	0	0	k__Bacteria;p__SAR324_clade(Marine_group_B);c__SAR324_clade(Marine_group_B);o__SAR324_clade(Marine_group_B);f__SAR324_clade(Marine_group_B);g__SAR324_clade(Marine_group_B);s__
OTU_1476	1	3	0	0	1	0	0	0	k__Bacteria;p__Armatimonadota;c__Armatimonadia;o__Armatimonadales;f__Armatimonadaceae;g__Armatimonas;s__	1	2	0	6	3	0	0	0	0	0	0	0	0	1	0	0	0	0	0	0	0	0	0	0	k__Bacteria;p__Armatimonadota;c__Armatimonadia;o__Armatimonadales;f__Armatimonadaceae;g__Armatimonas;s__
OTU_1477	0	0	0	8	0	0	0	0	k__Bacteria;p__Acidobacteriota;c__Acidobacteriae;o__Subgroup_2;f__Subgroup_2;g__Subgroup_2;s__	0	0	0	0	0	0	0	0	0	24	0	0	0	0	0	0	0	0	0	0	0	0	0	0	k__Bacteria;p__Acidobacteriota;c__Acidobacteriae;o__Subgroup_2;f__Subgroup_2;g__Subgroup_2;s__
OTU_1478	0	0	1	0	0	0	8	3	k__Bacteria;p__Acidobacteriota;c__Acidobacteriae;o__Bryobacterales;f__Bryobacteraceae;g__Bryobacter;s__	0	0	0	0	0	0	0	0	1	0	0	0	0	0	0	0	0	0	2	1	21	6	1	1	k__Bacteria;p__Acidobacteriota;c__Acidobacteriae;o__Bryobacterales;f__Bryobacteraceae;g__Bryobacter;s__
OTU_1479	0	0	0	8	0	0	0	0	Unknown	0	0	0	0	0	0	0	0	0	17	7	0	0	0	0	0	0	0	0	0	0	0	0	0	Unknown
OTU_1480	0	0	0	9	0	0	0	0	k__Bacteria;p__Armatimonadota;c__Armatimonadia;o__Armatimonadales;f__Armatimonadales;g__Armatimonadales;s__	0	0	0	0	0	0	0	0	0	27	0	0	0	0	0	0	0	0	0	0	0	0	0	0	k__Bacteria;p__Armatimonadota;c__Armatimonadia;o__Armatimonadales;f__Armatimonadales;g__Armatimonadales;s__
OTU_1481	0	0	7	1	0	2	9	3	k__Bacteria;p__Proteobacteria;c__Gammaproteobacteria;o__Gammaproteobacteria_Incertae_Sedis;f__Unknown_Family;g__Unknown_Family;s__	0	0	0	0	0	0	19	0	2	1	0	0	0	0	0	0	0	4	22	1	2	0	9	0	k__Bacteria;p__Proteobacteria;c__Gammaproteobacteria;o__Gammaproteobacteria_Incertae_Sedis;f__Unknown_Family;g__Unknown_Family;s__
OTU_1482	6	0	2	9	3	2	0	4	k__Bacteria;p__Firmicutes;c__Bacilli;o__Staphylococcales;f__Gemellaceae;g__Gemella;s__	6	1	9	0	0	0	3	3	0	15	9	1	7	0	0	0	4	0	0	0	0	8	2	1	k__Bacteria;p__Firmicutes;c__Bacilli;o__Staphylococcales;f__Gemellaceae;g__Gemella;s__
OTU_1483	0	0	2	0	0	1	4	2	k__Bacteria;p__Proteobacteria;c__Alphaproteobacteria;o__Rickettsiales;f__SM2D12;g__SM2D12;s__	0	0	0	0	0	0	0	5	0	0	0	0	0	0	0	0	0	2	0	9	2	0	0	4	k__Bacteria;p__Proteobacteria;c__Alphaproteobacteria;o__Rickettsiales;f__SM2D12;g__SM2D12;s__
OTU_1484	2	1	1	2	1	1	3	17	k__Bacteria;p__Proteobacteria;c__Alphaproteobacteria;o__Tistrellales;f__Geminicoccaceae;g__Candidatus_Alysiosphaera;s__	3	2	0	0	0	3	0	0	3	4	0	0	1	0	0	0	1	1	3	0	6	41	2	7	k__Bacteria;p__Proteobacteria;c__Alphaproteobacteria;o__Tistrellales;f__Geminicoccaceae;g__Candidatus_Alysiosphaera;s__
OTU_1485	5	2	1	2	3	3	0	0	k__Bacteria;p__Synergistota;c__Synergistia;o__Synergistales;f__Synergistaceae;g__;s__bacterium_enrichment	11	1	2	3	1	0	2	0	0	0	4	0	0	7	0	0	8	0	0	0	0	0	0	0	k__Bacteria;p__Synergistota;c__Synergistia;o__Synergistales;f__Synergistaceae;g__;s__bacterium_enrichment
OTU_1486	12	0	2	1	10	0	0	1	k__Bacteria;p__Firmicutes;c__Negativicutes;o__Veillonellales-Selenomonadales;f__Veillonellaceae;g__Dialister;s__Dialister_sp.	0	2	34	0	0	0	0	4	0	2	0	0	29	0	0	0	0	0	0	0	0	0	0	1	k__Bacteria;p__Firmicutes;c__Negativicutes;o__Veillonellales-Selenomonadales;f__Veillonellaceae;g__Dialister;s__Dialister_sp.
OTU_1487	51	0	7	1	0	0	0	0	k__Bacteria	11	17	123	0	0	0	0	3	16	2	0	0	0	0	0	0	0	0	0	0	0	0	0	0	k__Bacteria
OTU_1488	5	1	11	1	1	2	28	17	k__Bacteria;p__Proteobacteria;c__Alphaproteobacteria;o__Sphingomonadales;f__Sphingomonadaceae	6	0	7	0	0	1	11	19	3	0	2	0	1	0	0	0	0	4	17	31	35	14	5	32	k__Bacteria;p__Proteobacteria;c__Alphaproteobacteria;o__Sphingomonadales;f__Sphingomonadaceae
OTU_1489	4	17	3	1	1	1	13	15	k__Bacteria;p__Proteobacteria;c__Gammaproteobacteria;o__Burkholderiales;f__Comamonadaceae	7	2	1	31	18	1	0	7	0	3	0	0	0	0	3	1	0	0	0	37	2	27	12	6	k__Bacteria;p__Proteobacteria;c__Gammaproteobacteria;o__Burkholderiales;f__Comamonadaceae
OTU_1490	2	0	0	0	5	0	0	0	k__Bacteria;p__Desulfobacterota;c__Syntrophobacteria;o__Syntrophobacterales;f__Syntrophobacteraceae;g__Syntrophobacter;s__	0	0	5	0	0	0	0	0	0	0	0	0	14	0	0	0	0	0	0	0	0	0	0	0	k__Bacteria;p__Desulfobacterota;c__Syntrophobacteria;o__Syntrophobacterales;f__Syntrophobacteraceae;g__Syntrophobacter;s__
OTU_1491	0	0	0	0	3	2	0	0	Unknown	0	0	0	0	0	0	0	0	0	0	0	0	9	0	0	0	0	4	0	0	0	0	0	0	Unknown
OTU_1492	0	0	3	0	0	0	3	0	k__Bacteria;p__Desulfobacterota;c__Desulfobacteria;o__Desulfobacterales;f__Desulfosarcinaceae	0	0	0	0	0	0	9	0	0	0	0	0	0	0	0	0	0	0	8	0	0	0	0	0	k__Bacteria;p__Desulfobacterota;c__Desulfobacteria;o__Desulfobacterales;f__Desulfosarcinaceae
OTU_1493	1	0	6	6	1	3	0	0	k__Bacteria;p__Firmicutes;c__Bacilli;o__Lactobacillales;f__Lactobacillaceae;g__Lactobacillus	0	1	0	0	0	0	5	9	2	3	0	13	2	0	0	1	8	0	0	0	0	0	0	0	k__Bacteria;p__Firmicutes;c__Bacilli;o__Lactobacillales;f__Lactobacillaceae;g__Lactobacillus
OTU_1494	1	0	1	0	0	0	3	1	k__Bacteria;p__Proteobacteria;c__Alphaproteobacteria;o__Paracaedibacterales;f__Paracaedibacteraceae;g__Candidatus_Paracaedibacter;s__	1	1	0	0	0	0	3	0	0	0	0	0	0	0	0	0	0	0	7	0	2	0	0	2	k__Bacteria;p__Proteobacteria;c__Alphaproteobacteria;o__Paracaedibacterales;f__Paracaedibacteraceae;g__Candidatus_Paracaedibacter;s__
OTU_1495	5	5	1	2	3	11	0	0	k__Bacteria;p__Firmicutes;c__Clostridia;o__Peptostreptococcales-Tissierellales;f__Peptostreptococcales-Tissierellales;g__Tissierella;s__	0	13	0	2	0	13	2	0	0	0	0	5	0	7	1	0	32	0	0	0	0	0	0	0	k__Bacteria;p__Firmicutes;c__Clostridia;o__Peptostreptococcales-Tissierellales;f__Peptostreptococcales-Tissierellales;g__Tissierella;s__
OTU_1496	0	0	6	0	0	1	1	0	k__Bacteria;p__Proteobacteria;c__Gammaproteobacteria;o__Pseudomonadales;f__Moraxellaceae;g__Acinetobacter;s__Acinetobacter_marinus	0	0	0	0	0	0	1	15	0	0	0	0	0	0	0	0	1	0	0	1	0	0	0	0	k__Bacteria;p__Proteobacteria;c__Gammaproteobacteria;o__Pseudomonadales;f__Moraxellaceae;g__Acinetobacter;s__Acinetobacter_marinus
OTU_1499	0	0	1	7	1	1	0	0	Unknown	0	0	0	0	0	0	0	1	0	0	17	4	3	0	0	0	1	0	0	0	0	0	0	0	Unknown
OTU_1500	0	4	3	0	0	4	1	0	k__Bacteria;p__Firmicutes;c__Clostridia;o__Christensenellales;f__Christensenellaceae;g__Christensenellaceae_R-7_group;s__	0	0	0	0	0	10	7	0	0	0	0	0	0	0	0	0	10	0	2	0	0	0	0	0	k__Bacteria;p__Firmicutes;c__Clostridia;o__Christensenellales;f__Christensenellaceae;g__Christensenellaceae_R-7_group;s__
OTU_1501	0	0	2	0	0	1	6	2	k__Bacteria;p__WPS-2;c__WPS-2;o__WPS-2;f__WPS-2;g__WPS-2	0	0	0	0	0	0	0	0	4	0	0	0	0	0	0	0	0	3	0	2	14	4	0	1	k__Bacteria;p__WPS-2;c__WPS-2;o__WPS-2;f__WPS-2;g__WPS-2
OTU_1502	0	0	0	1	0	1	1	14	k__Bacteria;p__Fibrobacterota;c__Fibrobacteria;o__Fibrobacterales;f__Fibrobacteraceae;g__Fibrobacter;s__	0	0	0	0	0	0	0	0	0	3	0	0	0	0	0	0	0	1	0	0	3	0	36	6	k__Bacteria;p__Fibrobacterota;c__Fibrobacteria;o__Fibrobacterales;f__Fibrobacteraceae;g__Fibrobacter;s__
OTU_1503	1	0	0	0	0	0	1	8	k__Bacteria;p__Bdellovibrionota;c__Oligoflexia;o__Oligoflexales	1	0	0	0	0	0	0	0	0	0	0	0	0	0	0	0	0	0	3	0	0	0	4	18	k__Bacteria;p__Bdellovibrionota;c__Oligoflexia;o__Oligoflexales
OTU_1504	0	0	3	5	0	0	0	0	Unknown	0	0	0	0	0	0	0	7	0	1	11	2	0	0	0	0	0	0	0	0	0	0	0	0	Unknown
OTU_1505	3	11	0	0	0	4	1	0	k__Bacteria;p__Proteobacteria;c__Gammaproteobacteria;o__Burkholderiales;f__Chitinimonadaceae;g__Chitinimonas;s__Chitinimonas_taiwanensis	5	2	0	1	27	4	0	0	0	0	0	0	0	0	0	10	0	0	1	0	0	0	0	0	k__Bacteria;p__Proteobacteria;c__Gammaproteobacteria;o__Burkholderiales;f__Chitinimonadaceae;g__Chitinimonas;s__Chitinimonas_taiwanensis
OTU_1506	0	0	3	0	1	0	9	20	k__Bacteria;p__Proteobacteria;c__Alphaproteobacteria;o__Rhizobiales	0	0	0	0	0	0	0	0	7	0	0	0	0	2	0	0	0	0	5	1	20	56	0	3	k__Bacteria;p__Proteobacteria;c__Alphaproteobacteria;o__Rhizobiales
OTU_1507	0	0	1	0	0	0	8	1	k__Bacteria;p__Bacteroidota;c__Bacteroidia	0	0	0	0	0	0	0	3	0	0	0	0	0	0	0	0	0	0	2	22	0	0	0	1	k__Bacteria;p__Bacteroidota;c__Bacteroidia
OTU_1508	0	0	1	0	0	0	10	4	k__Bacteria;p__Planctomycetota;c__Planctomycetes;o__Gemmatales;f__Gemmataceae;g__Gemmata;s__	0	0	0	0	0	0	0	0	2	0	0	0	0	0	0	0	0	0	2	11	16	8	0	2	k__Bacteria;p__Planctomycetota;c__Planctomycetes;o__Gemmatales;f__Gemmataceae;g__Gemmata;s__
OTU_1509	2	0	1	1	2	1	1	0	k__Bacteria;p__Actinobacteriota;c__Actinobacteria;o__Propionibacteriales;f__Propionibacteriaceae;g__Cutibacterium;s__Cutibacterium_granulosum	0	0	5	0	0	0	1	0	0	0	1	0	5	0	0	0	2	0	2	0	0	0	0	0	k__Bacteria;p__Actinobacteriota;c__Actinobacteria;o__Propionibacteriales;f__Propionibacteriaceae;g__Cutibacterium;s__Cutibacterium_granulosum
OTU_1510	0	0	0	1	0	0	0	0	k__Bacteria;p__Firmicutes;c__Clostridia;o__Oscillospirales;f__Oscillospiraceae;g__;s__	0	0	0	0	0	0	0	0	0	1	0	0	0	0	0	0	0	0	0	0	0	0	0	0	k__Bacteria;p__Firmicutes;c__Clostridia;o__Oscillospirales;f__Oscillospiraceae;g__;s__
OTU_1511	1	0	0	0	9	3	0	0	Unknown	0	0	1	0	0	0	0	0	0	0	0	0	26	0	0	9	0	0	0	0	0	0	0	0	Unknown
OTU_1512	0	0	1	0	0	0	5	1	k__Bacteria;p__Verrucomicrobiota;c__Verrucomicrobiae;o__Chthoniobacterales;f__Terrimicrobiaceae;g__FukuN18_freshwater_group;s__	0	0	0	0	0	0	0	3	0	0	0	0	0	0	0	0	0	0	5	7	2	0	0	2	k__Bacteria;p__Verrucomicrobiota;c__Verrucomicrobiae;o__Chthoniobacterales;f__Terrimicrobiaceae;g__FukuN18_freshwater_group;s__
OTU_1513	0	6	1	0	1	0	0	8	k__Bacteria;p__Bacteroidota;c__SJA-28;o__SJA-28;f__SJA-28;g__SJA-28	0	0	0	16	0	0	0	2	0	0	0	0	0	0	3	0	0	0	0	0	0	23	0	0	k__Bacteria;p__Bacteroidota;c__SJA-28;o__SJA-28;f__SJA-28;g__SJA-28
OTU_1514	5	0	0	0	7	0	0	0	k__Bacteria;p__Actinobacteriota;c__Coriobacteriia;o__Coriobacteriales;f__Atopobiaceae;g__Atopobium;s__Atopobium_vaginae	0	0	13	0	0	0	0	0	0	0	0	0	20	0	0	0	0	0	0	0	0	0	0	0	k__Bacteria;p__Actinobacteriota;c__Coriobacteriia;o__Coriobacteriales;f__Atopobiaceae;g__Atopobium;s__Atopobium_vaginae
OTU_1515	0	3	15	0	0	3	7	0	k__Bacteria;p__Firmicutes;c__Clostridia;o__Clostridia;f__Hungateiclostridiaceae;g__Fastidiosipila;s__	0	0	0	0	0	9	43	0	0	0	0	0	0	0	0	0	7	0	20	0	0	0	0	0	k__Bacteria;p__Firmicutes;c__Clostridia;o__Clostridia;f__Hungateiclostridiaceae;g__Fastidiosipila;s__
OTU_1516	0	0	2	0	0	1	9	1	k__Bacteria;p__Desulfobacterota;c__;o__;f__;g__	0	0	0	0	0	0	0	0	6	0	0	0	0	0	0	0	0	1	2	3	20	2	0	0	k__Bacteria;p__Desulfobacterota;c__;o__;f__;g__
OTU_1517	0	0	0	0	0	0	0	9	k__Bacteria;p__Proteobacteria;c__Gammaproteobacteria;o__Steroidobacterales;f__Steroidobacteraceae;g__;s__	0	0	0	0	0	0	0	0	0	0	0	0	0	0	0	0	0	0	0	0	0	25	0	0	k__Bacteria;p__Proteobacteria;c__Gammaproteobacteria;o__Steroidobacterales;f__Steroidobacteraceae;g__;s__
OTU_1518	0	3	0	0	0	4	0	0	Unknown	0	0	0	0	0	8	0	0	0	0	0	0	0	0	0	0	0	10	0	0	0	0	0	0	Unknown
OTU_1519	0	0	13	1	0	1	70	4	k__Bacteria;p__Proteobacteria;c__Gammaproteobacteria;o__Burkholderiales;f__Rhodocyclaceae	0	0	0	0	0	0	7	16	14	0	1	0	0	0	0	0	0	3	58	70	82	0	1	11	k__Bacteria;p__Proteobacteria;c__Gammaproteobacteria;o__Burkholderiales;f__Rhodocyclaceae
OTU_1520	3	1	18	8	6	14	27	14	k__Bacteria;p__Proteobacteria;c__Alphaproteobacteria;o__Sphingomonadales;f__Sphingomonadaceae;g__Sphingobium	4	2	1	0	0	1	29	18	7	13	5	5	9	3	4	4	2	34	54	18	9	11	6	25	k__Bacteria;p__Proteobacteria;c__Alphaproteobacteria;o__Sphingomonadales;f__Sphingomonadaceae;g__Sphingobium
OTU_1521	9	0	11	12	0	0	0	0	k__Bacteria	5	9	12	0	0	0	7	1	23	10	22	3	0	0	0	0	0	0	0	0	0	0	0	0	k__Bacteria
OTU_1522	1	2	1	0	0	0	2	5	k__Bacteria;p__Bacteroidota;c__Bacteroidia;o__Chitinophagales;f__Saprospiraceae;g__;s__	0	0	1	5	0	0	0	2	0	0	0	0	0	0	0	0	0	0	0	1	3	12	0	1	k__Bacteria;p__Bacteroidota;c__Bacteroidia;o__Chitinophagales;f__Saprospiraceae;g__;s__
[truncated: 5,692 more rows]
