# Supplementary material for: Microbiome Composition and Microbial Community Structure in Mosquito Vectors Aedes aegypti and Aedes albopictus in Northeastern Thailand, a Dengue-Endemic Area
Source: Insects. 2023 Feb 13;14(2):184. doi: 10.3390/insects14020184 (PMC9961164; doi:10.3390/insects14020184)
Supplement: Supplementary file 1 [file insects-14-00184-s001.zip › Table S3_28-12-22.xlsx]

## Sheet: Phylum
Table S3. Numbers of bacterial sequences assigned to each taxonomic rank (phylum, class, order, family, genus, species) across all sample categories.
Phylum	Mean sequence count of each taxonomy rank per sample group
	AeyL	AlbL	AeyF	AeyM	AlbF	AlbM	AeyW	AlbW
Proteobacteria	67053	102602	79503	41232	131782	106580	50939	48665
Firmicutes	40541	2843	14906	34923	3772	5779	1076	3019
Bacteroidota	4888	14266	1476	4186	714	997	7897	4743
Spirochaetota	4427	21311	82	53	112	12375	44	133
Verrucomicrobiota	191	644	1434	1936	56	155	7624	26102
Actinobacteriota	7629	2286	2897	4170	808	614	5369	4535
Chloroflexi	727	332	723	200	155	185	7365	9655
Myxococcota	74	43	1670	24	31	269	16169	781
Nitrospirota	28	36	663	15	18	47	12604	322
Planctomycetota	60	62	557	56	16	60	10391	1503
Acidobacteriota	174	1098	845	83	128	111	5748	3183
Patescibacteria	74	122	404	80	16	43	8354	530
Cyanobacteria	378	1109	46	1125	40	162	278	453
Bdellovibrionota	120	57	227	71	29	48	930	1752
Gemmatimonadota	27	32	282	26	23	47	1769	282
Desulfobacterota	203	166	300	101	247	214	184	251
Fibrobacterota	10	14	1	30	1	6	30	1115
Armatimonadota	12	22	133	20	4	14	732	166
Fusobacteriota	14	6	9	735	8	9	2	9
Synergistota	14	40	383	8	11	56	174	1
Deinococcota	11	13	15	24	1	4	32	278
Dependentiae	4	2	20	2	4	1	142	8
WPS-2	7	6	23	5	0	5	56	46
Caldatribacteriota	4	3	73	13	4	4	33	2
NB1-j	1	2	16	2	0	6	53	44
Marinimicrobia_(SAR406_clade)	0	0	0	86	0	0	0	0
Cloacimonadota	0	1	38	0	0	1	10	0
SAR324_clade(Marine_group_B)	0	0	1	18	1	0	2	27
Thermotogota	0	0	24	0	0	1	21	0
Deferribacterota	0	1	0	39	0	0	0	0
Sumerlaeota	0	0	1	0	0	0	1	36
MBNT15	1	0	3	1	1	0	10	9
Hydrogenedentes	1	0	3	1	1	0	5	12
Elusimicrobiota	2	2	3	4	2	0	4	3
FCPU426	0	0	2	0	0	0	7	2
Methylomirabilota	0	0	2	0	1	0	0	4
Sva0485	2	0	0	0	3	0	0	0
Latescibacterota	1	0	0	0	0	1	0	1
Entotheonellaeota	0	1	0	0	0	0	0	0

## Sheet: Class 
Table S3. Numbers of bacterial sequences assigned to each taxonomic rank (phylum, class, order, family, genus, species) across all sample categories.
Class	Mean sequence count of each taxonomy rank per sample group
	AeyL	AlbL	AeyF	AeyM	AlbF	AlbM	AeyW	AlbW
Gammaproteobacteria	58158	89221	63768	34698	57693	8293	19994	19221
Alphaproteobacteria	8893	13381	15734	6533	74088	98286	30944	29437
Bacilli	38902	1255	8499	15438	1715	1439	289	976
Bacteroidia	4882	14256	1440	4181	707	989	7653	4680
Spirochaetia	4427	21311	77	53	111	12374	39	131
Verrucomicrobiae	185	618	1414	1922	56	149	7430	26080
Clostridia	1486	977	6133	16652	1982	3203	675	1875
Actinobacteria	7349	2074	2040	3948	696	414	2598	3065
Polyangia	67	42	1646	23	28	265	16110	768
Anaerolineae	432	304	652	161	120	149	7185	9215
Nitrospiria	24	36	658	14	16	46	12603	321
Saccharimonadia	64	19	393	75	16	36	8273	420
Planctomycetes	41	49	317	42	12	47	4772	1007
Phycisphaerae	7	12	214	12	2	9	5337	455
Blastocatellia	116	1051	178	15	101	29	1373	2304
Acidimicrobiia	166	169	493	111	65	151	1742	1279
Vicinamibacteria	24	17	350	13	4	33	2992	493
Cyanobacteriia	378	1108	42	1114	40	162	266	434
Negativicutes	58	9	49	2757	63	26	10	168
Gemmatimonadetes	25	32	268	19	20	45	1757	280
Oligoflexia	41	20	100	57	10	31	516	1460
Acidobacteriae	32	28	302	43	22	38	1372	336
Limnochordia	81	581	18	63	3	1076	13	0
Thermoleophilia	96	38	324	26	20	39	1010	180
Fibrobacteria	10	14	1	30	1	6	30	1115
Fimbriimonadia	11	19	132	10	3	14	730	165
Bdellovibrionia	79	37	123	14	19	16	400	292
Chloroflexia	285	20	41	21	26	31	134	347
Fusobacteriia	14	6	9	735	8	9	2	9
Desulfuromonadia	151	130	83	20	180	152	44	11
Synergistia	14	40	383	8	11	56	174	1
Desulfovibrionia	29	25	25	66	29	34	35	217
Deinococci	11	13	15	24	1	4	32	278
Kapabacteria	2	3	32	3	3	6	243	54
OM190	12	1	26	1	2	4	273	14
Gracilibacteria	10	103	1	5	0	7	52	102
Chlamydiae	6	23	20	1	0	6	194	17
Syntrophia	8	5	144	1	8	11	70	0
Coriobacteriia	13	2	37	78	23	10	18	11
Babeliae	4	2	20	2	4	1	142	8
Syntrophomonadia	3	8	103	2	1	16	43	0
WPS-2	7	6	23	5	0	5	56	46
NB1-j	1	2	16	2	0	6	53	44
Campylobacteria	4	3	64	13	4	2	28	2
Myxococcia	7	1	24	1	3	4	59	13
KD4-96	4	6	8	3	5	3	18	50
Marinimicrobia_(SAR406_clade)	0	0	0	86	0	0	0	0
Holophagae	2	2	3	9	0	9	9	47
Desulfotomaculia	1	4	36	0	0	6	13	0
Cloacimonadia	0	1	38	0	0	1	10	0
Incertae_Sedis	1	2	30	0	0	2	14	0
SAR324_clade(Marine_group_B)	0	0	1	18	1	0	2	27
Desulfobulbia	7	3	14	4	9	2	6	1
Thermotogae	0	0	24	0	0	1	21	0
Syntrophobacteria	4	0	10	6	10	10	1	1
Deferribacteres	0	1	0	39	0	0	0	0
Sumerlaeia	0	0	1	0	0	0	1	36
vadinHA49	0	0	0	1	0	0	9	27
Vampirivibrionia	0	1	3	11	0	0	7	14
TK10	0	2	6	3	2	1	11	10
Parcubacteria	0	0	1	0	0	0	26	7
Longimicrobia	1	0	12	1	2	2	11	2
Syntrophorhabdia	1	2	13	1	2	2	8	0
Dehalococcoidia	2	0	5	1	1	0	8	8
MBNT15	1	0	3	1	1	0	10	9
Hydrogenedentia	1	0	3	1	1	0	5	12
SJA-28	0	6	2	1	1	1	0	8
Armatimonadia	1	3	1	10	1	0	1	1
JG30-KF-CM66	0	0	4	1	0	0	5	7
Symbiobacteriia	0	0	11	0	0	0	6	0
Rubrobacteria	5	1	0	7	3	0	0	0
Omnitrophia	0	3	0	13	0	0	0	0
JS1	0	0	8	0	0	2	5	0
OLB14	0	0	1	1	0	0	2	11
Desulfitobacteriia	3	0	6	1	1	1	2	0
Leptospirae	0	0	4	0	1	1	5	2
Thermoanaerobaculia	0	0	6	1	0	1	2	2
Ktedonobacteria	2	0	3	5	0	0	0	2
Desulfobacteria	1	0	3	1	4	0	3	0
Thermoanaerobacteria	2	3	0	3	0	4	0	0
Thermodesulfovibrionia	4	0	4	1	2	0	1	0
Subgroup_25	0	0	6	2	1	1	0	1
Sericytochromatia	0	0	1	0	0	0	5	5
FCPU426	0	0	2	0	0	0	7	2
Sulfobacillia	4	0	0	0	6	0	1	0
Dojkabacteria	0	0	7	0	0	0	3	1
Ignavibacteria	3	1	0	1	3	1	0	0
Desulfarculia	2	1	0	0	5	0	0	0
D8A-2	0	1	4	0	0	0	3	0
SHA-26	1	0	1	3	0	1	0	1
Methylomirabilia	0	0	2	0	1	0	0	4
Endomicrobia	1	0	2	1	1	0	1	0
Lineage_Iia	0	1	1	0	0	0	3	1
Moorellia	0	1	4	0	0	0	1	0
Lineage_Iib	1	1	0	0	1	0	0	2
Dethiobacteria	0	0	2	0	0	2	1	0
BD2-11_terrestrial_group	0	0	0	5	0	0	0	0
Sva0485	2	0	0	0	3	0	0	0
Kiritimatiellae	0	0	0	0	0	0	0	5
Gitt-GS-136	0	0	1	0	0	0	1	2
S0134_terrestrial_group	0	0	2	1	0	0	1	0
Kryptonia	0	0	2	0	0	0	1	0
Desulfobaccia	0	0	0	0	0	1	1	1
Elusimicrobia	0	0	0	3	0	0	0	0
Latescibacterota	1	0	0	0	0	1	0	1
4-29-1	0	0	1	0	0	1	0	1
RBG-16-55-12	0	0	1	0	0	0	1	0
Rhodothermia	1	0	0	0	0	0	0	1
AKAU4049	1	0	0	0	1	0	0	0
Microgenomatia	0	0	2	0	0	0	0	0
Caldatribacteriia	0	0	1	0	0	0	0	0
Entotheonellia	0	1	0	0	0	0	0	0
Thermovenabulia	0	0	1	0	0	0	0	0
MVP-15	0	0	1	0	0	0	0	0

## Sheet: Order
Table S3. Numbers of bacterial sequences assigned to each taxonomic rank (phylum, class, order, family, genus, species) across all sample categories.
Order	Mean sequence count of each taxonomy rank per sample group
	AeyL	AlbL	AeyF	AeyM	AlbF	AlbM	AeyW	AlbW
Rickettsiales	1540	3254	5734	2521	70750	92834	1011	537
Enterobacterales	25503	59851	16021	22535	5425	3906	214	627
Burkholderiales	31477	28267	4487	9228	2846	2480	15908	11952
Aeromonadales	54	161	41701	907	47324	1015	432	849
Bacillales	37662	974	65	440	531	91	94	257
Spirochaetales	4427	21311	77	53	111	12374	39	131
Rhizobiales	2119	3514	3499	2034	1775	2198	7377	6298
Opitutales	74	400	28	448	6	58	454	25189
Rhodobacterales	1388	4024	766	535	365	686	3295	11956
Erysipelotrichales	744	101	7248	11503	589	718	130	418
Sphingomonadales	1543	684	2522	810	810	1432	5810	4517
Polyangiales	36	31	1462	18	20	217	15247	650
Lachnospirales	550	296	3134	9824	1006	1534	136	688
Cytophagales	2744	7276	201	77	92	175	2063	2443
Nitrospirales	24	36	658	14	16	46	12603	321
Acetobacterales	446	765	1280	195	217	346	6546	3019
Micrococcales	4601	1641	1321	292	362	208	1232	2364
Bacteroidales	483	3853	628	3945	334	543	254	512
Caldilineales	203	214	30	128	22	70	302	8717
Saccharimonadales	64	19	393	75	16	36	8273	420
Caulobacterales	1376	205	936	214	134	354	4028	1160
Pseudomonadales	784	677	250	760	497	460	220	3669
Chitinophagales	826	1079	271	62	120	111	3569	1188
RBG-13-54-9	117	53	432	7	59	33	5980	232
Peptostreptococcales-Tissierellales	438	84	1971	2401	492	559	160	415
Verrucomicrobiales	83	150	1182	1460	39	74	2788	483
Phycisphaerales	6	4	212	4	0	9	5318	115
Lactobacillales	349	44	914	3265	252	278	33	196
Blastocatellales	111	1045	139	15	92	19	1241	2276
Pedosphaerales	18	53	189	7	7	12	4136	281
Oscillospirales	195	221	343	2715	330	542	39	159
Xanthomonadales	129	78	435	789	1466	225	695	627
Vicinamibacterales	23	17	350	13	4	33	2992	488
Bifidobacteriales	21	4	144	3338	104	70	2	86
Microtrichales	150	158	392	89	59	134	1423	1157
Flavobacteriales	569	1634	111	63	133	72	347	246
Reyranellales	43	15	494	33	6	75	1698	809
Veillonellales-Selenomonadales	49	7	43	2710	61	24	10	163
Gemmatales	19	19	119	21	4	17	1968	635
Sphingobacteriales	254	410	223	32	27	85	1378	282
PeM15	1678	168	82	75	31	13	218	222
Gemmatimonadales	25	32	268	19	20	45	1757	280
Azospirillales	193	741	65	80	3	251	184	563
Chloroplast	212	995	30	67	18	144	231	329
MBA03	81	581	18	63	3	1076	13	0
Corynebacteriales	896	183	128	113	105	45	249	105
Oligoflexales	32	17	26	49	5	26	254	1331
Bryobacterales	15	25	239	12	9	27	1150	249
Clostridiales	110	77	57	1149	57	46	67	131
Solirubrobacterales	85	22	296	17	12	29	938	113
SBR1031	94	19	170	18	24	25	856	181
Pirellulales	7	17	77	7	6	13	1060	152
Frankiales	54	21	252	14	20	29	724	177
Fibrobacterales	10	14	1	30	1	6	30	1115
Cyanobacteriales	58	52	5	1036	11	7	2	31
Fimbriimonadales	11	19	132	10	3	14	730	165
Christensenellales	31	28	259	69	24	37	148	369
R7C24	5	3	106	2	2	14	638	161
Bdellovibrionales	18	24	122	12	11	16	396	287
Clostridia	46	115	192	57	16	195	103	73
Fusobacteriales	14	6	9	735	8	9	2	9
Haliangiales	1	0	112	0	1	28	571	63
Isosphaerales	10	8	44	10	2	7	533	138
Chloroflexales	276	17	17	12	21	13	53	302
Geobacterales	150	130	55	19	180	152	10	2
Gammaproteobacteria_Incertae_Sedis	44	50	70	23	7	32	310	161
Synergistales	14	40	383	8	11	56	174	1
Planctomycetales	5	4	39	3	0	7	509	60
Ga0077536	3	3	190	1	3	18	349	51
Steroidobacterales	9	2	57	6	2	14	216	300
Diplorickettsiales	2	1	115	3	2	15	361	63
Clostridia_UCG-014	24	0	120	269	30	35	3	13
0319-6G20	9	3	72	8	5	5	258	129
Desulfovibrionales	29	25	25	66	29	34	35	217
Cellvibrionales	33	35	67	23	21	27	145	98
Propionibacteriales	54	20	60	72	58	25	96	46
Tepidisphaerales	1	8	2	8	2	0	19	340
Caldicoprobacterales	55	101	2	54	0	161	2	0
Micropepsales	8	4	64	13	3	9	177	87
Deinococcales	10	13	12	23	1	2	12	274
Kapabacteriales	2	3	32	3	3	6	243	54
OM190	12	1	26	1	2	4	273	14
Coxiellales	2	2	26	213	1	9	56	16
Tistrellales	31	20	45	10	7	14	93	94
Chlamydiales	6	23	20	1	0	6	194	17
Legionellales	8	3	59	4	4	10	113	64
Rhodospirillales	22	31	51	15	3	14	105	19
CCM19a	1	1	3	0	2	0	3	241
Syntrophales	8	5	144	1	8	11	70	0
Chthoniobacterales	10	15	15	7	4	5	52	127
Pasteurellales	9	1	22	138	18	11	1	24
CCD24	1	1	33	1	2	4	107	73
Gaiellales	11	15	27	9	8	10	72	67
Thermomicrobiales	9	3	23	7	5	18	81	45
IMCC26256	8	1	27	6	3	5	79	57
Babeliales	4	2	20	2	4	1	142	8
Oceanospirillales	29	48	12	18	25	6	15	26
Coriobacteriales	8	1	37	77	18	9	18	10
Syntrophomonadales	3	8	103	2	1	16	43	0
mle1-27	25	9	25	1	5	7	83	15
WD260	3	0	27	0	3	2	108	7
Monoglobales	7	0	19	77	19	14	0	13
Staphylococcales	18	5	29	54	16	12	2	12
WPS-2	7	6	23	5	0	5	56	46
Acidobacteriae	4	0	9	2	1	1	83	47
SJA-15	6	6	9	2	3	5	33	82
Holosporales	0	1	50	1	1	7	66	15
Ferrovibrionales	0	1	44	0	0	6	71	11
Leptolyngbyales	64	9	6	2	5	1	20	23
Paracaedibacterales	12	51	16	1	1	14	19	12
NB1-j	1	2	16	2	0	6	53	44
Elev-16S-1166	1	0	13	1	0	2	85	18
Campylobacterales	4	3	64	13	4	2	28	2
Micavibrionales	7	18	3	14	2	8	9	54
Myxococcales	7	1	24	1	3	4	59	13
JGI_0000069-P22	7	101	0	0	0	3	0	1
Salinisphaerales	16	7	15	9	8	9	36	8
Clostridia_vadinBB60_group	7	29	8	17	3	42	1	0
Blfdi19	3	1	19	4	2	6	50	21
Absconditabacteriales_(SR1)	3	1	1	1	0	2	50	44
KD4-96	4	6	8	3	5	3	18	50
Bacteriovoracales	61	13	1	2	8	0	4	5
Marinimicrobia_(SAR406_clade)	0	0	0	86	0	0	0	0
11-24	0	0	21	0	0	4	50	9
Anaerolineales	12	12	10	6	12	16	12	3
Streptomycetales	3	2	21	4	2	5	36	7
Pseudonocardiales	11	5	8	6	4	6	24	15
Alteromonadales	19	11	9	10	8	6	4	12
Mycoplasmatales	0	0	0	0	0	2	0	76
Paenibacillales	6	17	12	1	2	9	19	8
Desulfotomaculales	4	4	42	1	1	7	15	0
Nannocystales	2	1	12	0	0	2	50	6
Phormidesmiales	8	29	0	3	1	6	1	23
Acidaminococcales	9	0	6	47	2	2	0	4
Holophagales	1	2	1	9	0	4	7	43
Kineosporiales	22	8	3	4	2	2	6	20
Oxyphotobacteria_Incertae_Sedis	24	13	0	2	2	2	6	16
Dongiales	1	0	1	0	0	2	6	53
Actinomycetales	1	1	14	25	4	5	5	5
Acidobacteriales	7	1	21	12	7	5	1	5
Cloacimonadales	0	1	38	0	0	1	10	0
JG36-GS-52	0	1	0	0	1	0	1	47
Micromonosporales	3	19	2	2	1	5	4	13
DTU014	1	2	30	0	0	2	14	0
Defluviicoccales	1	0	7	10	0	2	15	14
SAR324_clade(Marine_group_B)	0	0	1	18	1	0	2	27
Desulfobulbales	7	3	14	4	9	2	6	1
PB19	1	0	9	1	0	0	25	9
Petrotogales	0	0	23	0	0	1	21	0
Syntrophobacterales	4	0	10	6	10	10	1	1
EV818SWSAP88	5	2	1	2	3	1	3	25
Actinomarinales	4	8	3	13	0	5	1	7
Alicyclobacillales	4	6	9	10	5	4	0	3
Deferribacterales	0	1	0	39	0	0	0	0
Sumerlaeales	0	0	1	0	0	0	1	36
vadinHA49	0	0	0	1	0	0	9	27
Elsterales	2	0	6	1	2	2	15	9
TK10	0	2	6	3	2	1	11	10
Gracilibacteria	0	1	0	1	0	0	1	30
Vibrionales	7	1	2	5	1	4	0	13
Zavarziniales	0	0	6	1	0	0	18	7
Thermales	1	0	3	1	0	2	20	4
Longimicrobiales	1	0	12	1	2	2	11	2
Peptococcales	1	4	13	3	0	3	6	0
Thermosynechococcales	3	9	0	1	0	1	3	12
Syntrophorhabdales	1	2	13	1	2	2	8	0
Eubacteriales	3	6	5	0	3	8	4	0
Subgroup_2	3	1	6	14	4	0	0	0
PLTA13	0	0	5	0	0	0	12	10
MBNT15	1	0	3	1	1	0	10	9
Hydrogenedentiales	1	0	3	1	1	0	5	12
Ectothiorhodospirales	0	0	9	0	0	0	3	11
SAR11_clade	0	0	2	18	1	1	0	0
S085	1	0	3	0	0	0	8	8
SJA-28	0	6	2	1	1	1	0	8
Armatimonadales	1	3	1	10	1	0	1	1
Candidatus_Zambryskibacteria	0	0	1	0	0	0	17	0
Thiomicrospirales	0	2	8	0	0	2	6	0
JG30-KF-CM66	0	0	4	1	0	0	5	7
Symbiobacteriales	0	0	11	0	0	0	6	0
Sneathiellales	0	0	12	0	0	0	4	1
Rubrobacterales	5	1	0	7	3	0	0	0
Obscuribacterales	0	0	2	0	0	0	5	9
Desulfuribacillales	3	3	0	4	0	6	0	0
Omnitrophales	0	3	0	13	0	0	0	0
JS1	0	0	8	0	0	2	5	0
OLB14	0	0	1	1	0	0	2	11
Acholeplasmatales	2	1	1	4	0	6	0	1
Thermoactinomycetales	1	4	3	0	0	2	5	0
Parvibaculales	1	2	3	0	1	3	4	1
Subgroup_7	1	0	2	0	0	5	2	4
OPB41	5	1	0	1	5	1	0	1
Solibacterales	0	1	1	1	1	0	1	8
Leptospirales	0	0	4	0	1	1	5	2
Pyrinomonadales	2	0	1	0	3	3	1	2
Thermoanaerobaculales	0	0	6	1	0	1	2	2
Gastranaerophilales	0	0	0	10	0	0	0	2
MAT-CR-H4-C10	2	1	4	0	0	2	3	0
Thermoanaerobacterales	2	3	0	3	0	4	0	0
1013-28-CG33	0	0	6	0	0	0	6	0
Sericytochromatia	0	0	1	0	0	0	5	5
FCPU426	0	0	2	0	0	0	7	2
Sulfobacillales	4	0	0	0	6	0	1	0
Dojkabacteria	0	0	7	0	0	0	3	1
Puniceispirillales	0	0	1	7	0	0	1	2
Ignavibacteriales	3	1	0	1	3	1	0	0
Ktedonobacterales	1	0	2	3	0	0	0	2
Synechococcales	2	0	1	3	1	1	0	0
Vampirovibrionales	0	1	1	1	0	0	2	3
Desulfarculales	2	1	0	0	5	0	0	0
Desulfuromonadia	0	0	6	0	0	0	2	0
D8A-2	0	1	4	0	0	0	3	0
Methylococcales	4	0	0	0	3	1	0	0
SHA-26	1	0	1	3	0	1	0	1
Izemoplasmatales	0	1	3	0	0	0	3	0
Subgroup_17	1	0	0	0	0	0	0	5
Desulfatiglandales	1	0	0	1	4	0	0	0
Desulfobacterales	0	0	3	0	0	0	3	0
Endomicrobiales	1	0	2	1	1	0	1	0
Lineage_Iia	0	1	1	0	0	0	3	1
Desulfitibacterales	0	1	4	0	0	0	1	0
Subgroup_25	0	0	3	1	1	0	0	0
Dehalococcoidales	1	0	2	1	1	0	0	0
Lineage_Iib	1	1	0	0	1	0	0	2
RsaHf231	1	0	2	1	0	1	0	0
Dethiobacterales	0	0	2	0	0	2	1	0
BD2-11_terrestrial_group	0	0	0	5	0	0	0	0
Rokubacteriales	0	0	1	0	0	0	0	4
Kiloniellales	0	0	0	0	0	0	0	5
Thalassobaculales	0	1	0	0	0	3	0	1
UBA10353_marine_group	0	0	1	4	0	0	0	0
Sva0485	2	0	0	0	3	0	0	0
WCHB1-41	0	0	0	0	0	0	0	5
Subgroup_11	0	0	2	1	0	0	0	1
053A03-B-DI-P58	0	0	1	0	0	0	3	0
Gitt-GS-136	0	0	1	0	0	0	1	2
C0119	1	0	1	2	0	0	0	0
Brevibacillales	0	0	0	2	0	1	0	1
RF39	0	0	0	3	1	0	0	0
S0134_terrestrial_group	0	0	2	1	0	0	1	0
UASB-TL25	0	0	0	0	0	0	0	4
AT-s3-44	0	0	2	0	0	0	1	1
Halothiobacillales	1	0	0	0	1	2	0	0
KF-JG30-C25	1	2	0	0	1	0	0	0
Streptosporangiales	1	0	0	0	1	0	1	0
Kryptoniales	0	0	2	0	0	0	1	0
Kallotenuales	0	0	1	2	0	0	0	0
Desulfobaccales	0	0	0	0	0	1	1	1
Elusimicrobiales	0	0	0	3	0	0	0	0
Caldalkalibacillales	0	0	2	1	0	0	0	0
Thermicanales	0	0	0	2	0	1	0	0
Thermincolales	1	0	0	1	1	0	0	0
Latescibacterota	1	0	0	0	0	1	0	1
4-29-1	0	0	1	0	0	1	0	1
EPR3968-O8a-Bc78	0	0	2	0	0	1	0	0
SAR86_clade	0	0	0	3	0	0	0	0
DS-100	0	0	0	0	0	0	0	2
Subgroup_22	0	0	1	0	0	1	0	0
RBG-16-55-12	0	0	1	0	0	0	1	0
SM1A07	0	0	1	0	0	0	1	0
Rhodothermales	1	0	0	0	0	0	0	1
Silvanigrellales	0	0	1	0	0	0	1	0
MSB-5E12	0	0	1	0	0	0	1	0
AKAU4049	1	0	0	0	1	0	0	0
Methylomirabilales	0	0	1	0	1	0	0	0
Candidatus_Daviesbacteria	0	0	2	0	0	0	0	0
Acidithiobacillales	1	0	0	0	1	0	0	0
CHAB-XI-27	0	0	0	0	0	0	2	0
KI89A_clade	0	0	0	0	0	0	0	2
Nitrosococcales	0	0	2	0	0	0	0	0
OM182_clade	0	0	0	2	0	0	0	0
FFCH16263	1	0	0	0	0	0	0	0
Caldatribacteriales	0	0	1	0	0	0	0	0
Entotheonellales	0	1	0	0	0	0	0	0
Haloplasmatales	0	0	0	0	0	0	0	1
Thermovenabulales	0	0	1	0	0	0	0	0
MidBa8	0	0	1	0	0	0	0	0
Candidatus_Peribacteria	0	0	0	0	0	0	0	1
Chromatiales	0	0	0	0	0	0	0	1
MVP-15	0	0	1	0	0	0	0	0
Kosmotogales	0	0	1	0	0	0	0	0

## Sheet: Family
Table S3. Numbers of bacterial sequences assigned to each taxonomic rank (phylum, class, order, family, genus, species) across all sample categories.
Family	Mean sequence count of each taxonomy rank per sample group
	AeyL	AlbL	AeyF	AeyM	AlbF	AlbM	AeyW	AlbW
Anaplasmataceae	1517	3246	5619	2395	70744	92808	782	451
Aeromonadaceae	43	161	41699	907	47314	1015	432	849
Yersiniaceae	19086	59544	229	169	3460	2563	5	64
Comamonadaceae	17050	22092	1515	442	1885	892	12168	8346
Enterobacteriaceae	1581	20	14530	20435	1787	1195	187	473
Planococcaceae	37522	859	24	361	499	7	41	10
Spirochaetaceae	4427	21311	77	53	111	12374	39	131
Opitutaceae	74	400	28	448	6	58	454	25188
Rhodobacteraceae	1388	4024	766	535	365	686	3295	11956
Rhodocyclaceae	12793	4979	121	420	270	519	488	1832
Sphingomonadaceae	1543	684	2522	810	810	1432	5810	4517
Lachnospiraceae	545	249	3134	9816	1006	1435	134	677
Sandaracinaceae	23	14	1209	13	12	190	14326	524
Erysipelotrichaceae	518	94	4902	7728	409	486	88	287
Nitrospiraceae	24	36	658	14	16	46	12603	321
Acetobacteraceae	445	764	1280	195	217	345	6546	3018
Spirosomaceae	2699	7191	87	57	86	141	1105	1320
Microbacteriaceae	4510	1488	274	235	285	116	768	2242
Caldilineaceae	203	214	30	128	22	70	302	8717
Saccharimonadales	54	18	363	14	9	26	8201	386
Sutterellaceae	472	6	1936	4607	486	357	237	529
Rhizobiaceae	866	2144	953	318	1036	862	517	393
Erysipelatoclostridiaceae	226	7	2346	3774	180	232	42	131
RBG-13-54-9	117	53	432	7	59	33	5980	232
Peptostreptococcaceae	396	27	1871	2279	470	468	111	395
Phycisphaeraceae	6	4	212	4	0	9	5318	115
Chitinophagaceae	603	433	239	50	52	100	3235	772
Rhizobiales_Incertae_Sedis	722	828	338	176	195	191	1260	1446
Hyphomonadaceae	1215	154	435	119	14	112	2409	678
Thorselliaceae	4681	279	1	119	0	0	1	46
Moraxellaceae	299	385	150	448	237	59	165	3334
Blastocatellaceae	111	1045	139	15	92	19	1241	2276
Dysgonomonadaceae	312	3762	26	56	190	404	9	0
Pedosphaeraceae	18	53	189	7	7	12	4136	281
Alcaligenaceae	264	367	27	3458	4	435	26	15
Xanthobacteraceae	62	33	786	100	106	321	2250	887
Beijerinckiaceae	183	265	585	1122	289	426	998	601
Xanthomonadaceae	124	73	411	783	1460	215	630	610
Bifidobacteriaceae	21	4	144	3338	104	70	2	86
Vicinamibacteraceae	19	14	325	11	2	30	2818	324
Verrucomicrobiales	24	133	169	8	7	27	2770	355
Morganellaceae	143	1	1169	1695	166	137	20	43
Caulobacteraceae	158	45	499	92	120	239	1612	469
Reyranellaceae	43	15	494	33	6	75	1698	809
Ruminococcaceae	115	69	265	1938	259	230	9	132
Gemmataceae	19	19	119	21	4	17	1968	635
Veillonellaceae	30	1	28	2616	30	14	2	38
Bacteroidaceae	26	3	75	2423	67	39	1	21
Akkermansiaceae	54	0	1011	1447	30	45	15	50
PeM15	1678	168	82	75	31	13	218	222
Gemmatimonadaceae	25	32	268	19	20	45	1757	280
Streptococcaceae	79	11	104	1959	70	68	7	79
Enterococcaceae	136	1	744	1010	133	140	19	82
Pseudomonadaceae	485	292	100	312	260	401	55	335
Hyphomicrobiaceae	51	54	371	40	25	69	1080	451
Chloroplast	212	995	30	67	18	144	231	329
Azospirillaceae	192	741	22	78	3	245	107	550
Burkholderiaceae	245	81	303	92	41	95	857	196
Weeksellaceae	125	1416	14	13	85	8	65	24
Bryobacteraceae	15	25	239	12	9	27	1150	249
Pleomorphomonadaceae	134	51	8	112	6	39	132	1233
Clostridiaceae	109	77	56	1145	57	44	66	129
env.OPS_17	65	351	47	8	0	25	867	207
Oligoflexales	14	14	15	34	1	14	210	1226
Bogoriellaceae	9	22	968	6	2	37	420	0
Microscillaceae	29	36	51	9	5	20	293	980
A4b	93	19	170	17	24	25	854	179
Nitrosomonadaceae	19	11	253	35	11	31	839	153
Pirellulaceae	7	17	77	7	6	13	1060	152
Fibrobacteraceae	10	14	1	30	1	6	30	1115
M55-D21	21	415	0	14	1	755	1	0
Devosiaceae	25	27	192	103	76	199	238	329
Flavobacteriaceae	350	201	79	32	43	56	179	164
Mycobacteriaceae	640	130	33	19	77	20	113	53
Fimbriimonadaceae	11	19	132	10	3	14	730	165
Saprospiraceae	150	246	20	11	33	6	208	367
Ilumatobacteraceae	54	53	30	33	13	22	131	659
Christensenellaceae	31	28	259	69	24	37	148	369
BIrii41	4	3	171	2	1	19	666	95
R7C24	5	3	106	2	2	14	638	161
Sporichthyaceae	38	15	177	10	9	18	513	110
Bdellovibrionaceae	18	24	122	12	11	16	396	287
Methylophilaceae	134	289	46	93	82	40	98	97
B1-7BS	29	22	87	5	16	12	411	226
Oscillospirales	35	18	37	609	43	38	12	11
Prolixibacteraceae	7	5	240	18	2	11	113	406
Bacillaceae	137	115	41	78	32	84	53	247
Hungateiclostridiaceae	46	113	185	57	15	191	101	73
Haliangiaceae	1	0	112	0	1	28	571	63
Fusobacteriaceae	6	2	7	732	7	7	1	6
Isosphaeraceae	10	8	44	10	2	7	533	138
Geobacteraceae	150	130	55	19	180	152	10	2
NS11-12_marine_group	160	34	27	9	3	7	395	57
Synergistaceae	14	40	383	8	11	56	174	1
Cytophagaceae	6	22	39	3	0	7	547	34
Chromobacteriaceae	263	308	0	10	12	44	2	13
Ga0077536	3	3	190	1	3	18	349	51
Steroidobacteraceae	9	2	57	6	2	14	216	300
Muribaculaceae	19	0	20	534	13	11	1	7
MBA03	58	161	3	47	1	316	1	0
Lactobacillaceae	121	27	56	238	42	58	4	26
Diplorickettsiaceae	2	1	115	3	2	15	361	63
Kaistiaceae	11	14	122	4	13	29	230	120
Nocardiaceae	234	48	56	14	7	7	133	28
Clostridia_UCG-014	24	0	120	269	30	35	3	13
0319-6G20	9	3	72	8	5	5	258	129
Oxalobacteraceae	95	21	44	14	10	14	158	113
Rikenellaceae	38	36	129	141	16	29	66	6
Tannerellaceae	9	3	9	403	12	11	2	2
SC-I-84	8	4	37	3	6	6	197	158
Iamiaceae	31	47	43	16	16	23	93	136
Chloroflexaceae	269	8	12	6	20	11	28	50
Prevotellaceae	30	0	30	303	19	9	2	5
Caldicoprobacteraceae	55	101	2	54	0	161	2	0
Desulfovibrionaceae	26	3	4	65	28	8	20	215
Micropepsaceae	8	4	64	13	3	9	177	87
Kapabacteriales	2	3	32	3	3	6	243	54
Solirubrobacteraceae	57	13	62	11	6	9	158	26
Tepidisphaeraceae	1	7	0	8	2	0	3	318
OM190	12	1	26	1	2	4	273	14
Polyangiaceae	6	9	72	2	5	7	206	24
Coxiellaceae	2	2	26	213	1	9	56	16
A0839	14	3	40	5	3	12	190	57
Geminicoccaceae	31	20	45	10	7	14	93	94
Deinococcaceae	8	12	2	11	1	2	7	266
Rickettsiaceae	3	2	88	1	2	11	170	32
Roseiflexaceae	7	9	4	6	1	2	22	252
Cellvibrionaceae	18	21	51	13	7	18	96	57
Legionellaceae	8	3	59	4	4	10	113	64
CCM19a	1	1	3	0	2	0	3	241
TRA3-20	3	6	33	2	3	5	164	28
Microtrichaceae	19	44	28	13	20	43	30	45
Peptostreptococcales-Tissierellales	28	29	27	77	13	45	11	1
Schlesneriaceae	1	0	16	0	0	2	195	11
Pasteurellaceae	9	1	22	138	18	11	1	24
CCD24	1	1	33	1	2	4	107	73
Propionibacteriaceae	43	2	36	58	49	8	13	7
Nocardioidaceae	11	18	24	14	9	17	83	39
Corynebacteriaceae	22	5	39	80	21	18	3	24
Rhodospirillaceae	10	23	46	0	1	13	101	13
SM2D12	6	10	18	10	5	33	72	53
Chthoniobacteraceae	7	12	13	3	3	4	43	115
37-13	25	11	10	0	0	4	126	22
NS9_marine_group	15	7	12	15	0	3	89	51
Nakamurellaceae	8	1	33	1	0	4	108	33
IMCC26256	8	1	27	6	3	5	79	57
JG30-KF-CM45	8	3	23	7	5	17	81	40
Syntrophomonadaceae	3	8	103	2	1	16	43	0
mle1-27	25	9	25	1	5	7	83	15
Frankiales	3	5	35	2	1	3	96	23
Mitochondria	11	3	12	109	3	9	13	8
ST-12K33	1	3	101	0	0	4	57	0
Smithellaceae	5	4	95	1	7	6	46	0
Rubinisphaeraceae	4	4	13	3	0	2	111	27
Babeliales	3	1	16	0	2	0	137	4
Sphingobacteriaceae	9	8	37	13	16	28	32	15
Anaerovoracaceae	12	19	29	35	7	32	14	7
Erwiniaceae	7	7	64	61	6	5	1	0
WD260	3	0	27	0	3	2	108	7
Demequinaceae	3	14	24	12	16	22	6	52
Monoglobaceae	7	0	19	77	19	14	0	13
WPS-2	7	6	23	5	0	5	56	46
Acidobacteriae	4	0	9	2	1	1	83	47
SJA-15	6	6	9	2	3	5	33	82
Bacteroidetes_vadinHA17	2	2	82	1	0	1	52	2
Holosporaceae	0	1	50	1	1	7	66	15
Parachlamydiaceae	1	0	11	0	0	1	120	6
Butyricicoccaceae	5	0	11	95	7	7	0	10
Rhodanobacteraceae	5	5	23	5	6	7	65	17
Leptolyngbyaceae	64	9	6	2	5	1	20	23
Crocinitomicaceae	79	10	6	3	5	5	14	7
Selenomonadaceae	14	1	15	57	28	7	1	6
Inquilinaceae	0	0	41	0	0	6	73	9
Sporomusaceae	3	5	0	10	3	2	6	97
Paracaedibacteraceae	12	51	16	1	1	14	19	12
NB1-j	1	2	16	2	0	6	53	44
Staphylococcaceae	12	5	27	45	13	10	2	8
Elev-16S-1166	1	0	13	1	0	2	85	18
Alcanivoracaceae1	20	46	6	1	20	3	12	12
Halieaceae	12	13	7	10	13	7	22	34
Eubacterium_coprostanoligenes_group	20	9	7	37	18	19	1	6
67-14	8	3	25	3	1	5	50	21
JGI_0000069-P22	7	101	0	0	0	3	0	1
Micrococcaceae	18	7	23	17	15	13	2	15
Rubritaleaceae	5	14	2	5	2	2	3	77
Ancalomicrobiaceae	3	1	2	9	1	5	13	75
Cellulomonadaceae	5	8	13	7	6	10	18	41
Solimonadaceae	16	7	15	9	8	9	36	8
Clostridia_vadinBB60_group	7	29	8	17	3	42	1	0
Blfdi19	3	1	19	4	2	6	50	21
Saccharimonadaceae	5	0	23	58	6	6	6	2
Myxococcaceae	7	1	22	0	3	4	58	9
Absconditabacteriales_(SR1)	3	1	1	1	0	2	50	44
Cyclobacteriaceae	5	1	2	3	0	2	5	81
KD4-96	4	6	8	3	5	3	18	50
Bacteriovoracaceae	61	13	1	2	8	0	4	5
Desulfomicrobiaceae	3	22	21	1	1	26	15	2
Chroococcidiopsaceae	41	28	1	0	7	2	1	8
Marinimicrobia_(SAR406_clade)	0	0	0	86	0	0	0	0
Neisseriaceae	21	1	11	2	7	3	20	21
f__11-24	0	0	21	0	0	4	50	9
Paludibacteraceae	4	15	2	4	3	11	3	42
Anaerolineaceae	12	12	10	6	12	16	12	3
Streptomycetaceae	3	2	21	4	2	5	36	7
Pseudonocardiaceae	11	5	8	6	4	6	24	15
Mycoplasmataceae	0	0	0	0	0	2	0	76
Chitinimonadaceae	16	47	0	0	1	9	3	2
Coriobacteriaceae	1	0	13	46	6	5	1	4
Marinilabiliaceae	23	17	1	7	0	10	1	16
Amoebophilaceae	0	0	11	1	0	2	56	4
Paenibacillaceae	6	17	12	1	2	9	19	8
Chitinibacteraceae	9	13	4	3	1	7	12	25
Sedimentibacteraceae	2	8	34	2	1	11	15	0
Nannocystaceae	2	1	12	0	0	2	50	6
Nodosilineaceae	8	29	0	3	1	6	1	23
Acidaminococcaceae	9	0	6	47	2	2	0	4
Ferrovibrionales	0	1	23	0	0	2	35	8
Lentimicrobiaceae	16	13	7	2	8	21	0	1
Holophagaceae	1	2	1	9	0	4	7	43
Kineosporiaceae	22	8	3	4	2	2	6	20
Atopobiaceae	7	1	20	7	8	3	16	5
Gaiellaceae	3	5	5	2	2	1	21	28
Phaselicystidaceae	3	5	9	0	0	1	46	3
Alteromonadaceae	18	10	9	9	8	5	4	2
Sulfurospirillaceae	0	1	41	1	0	0	21	0
Ferrovibrionaceae	0	0	21	0	0	4	36	3
Dongiaceae	1	0	1	0	0	2	6	53
Labraceae	0	2	2	1	2	2	8	44
Actinomycetaceae	1	1	14	25	4	5	5	5
Desulfotomaculales	1	4	36	0	0	6	13	0
LWQ8	4	1	4	3	0	1	17	23
Intrasporangiaceae	7	5	8	8	6	3	6	7
JG36-GS-52	0	1	0	0	1	0	1	47
Micromonosporaceae	3	19	2	2	1	5	4	13
DTU014	1	2	30	0	0	2	14	0
SAR324_clade(Marine_group_B)	0	0	1	18	1	0	2	27
Spongiibacteraceae	3	1	7	0	1	2	26	7
PB19	1	0	9	1	0	0	25	9
Petrotogaceae	0	0	23	0	0	1	21	0
Microcystaceae	8	15	0	4	2	1	1	13
Syntrophobacteraceae	4	0	10	6	10	10	1	1
EV818SWSAP88	5	2	1	2	3	1	3	25
Alicyclobacillaceae	4	6	9	10	5	4	0	3
Methylopilaceae	1	1	3	1	0	3	26	6
Simkaniaceae	4	23	1	1	0	4	5	3
Deferribacteraceae	0	1	0	39	0	0	0	0
Desulfobulbaceae	6	2	13	3	8	1	6	1
WD2101_soil_group	0	1	2	0	0	0	14	22
Trueperaceae	2	1	10	12	0	0	5	8
Sumerlaeaceae	0	0	1	0	0	0	1	36
Marinifilaceae	0	0	1	35	0	1	0	0
vadinHA49	0	0	0	1	0	0	9	27
TK10	0	2	6	3	2	1	11	10
Caedibacteraceae	2	6	2	3	0	3	6	12
Leeiaceae	26	3	0	1	0	0	1	3
Eggerthellaceae	0	0	4	23	4	1	0	1
Gracilibacteria	0	1	0	1	0	0	1	30
Vibrio	7	1	2	5	1	4	0	13
Halomonadaceae	5	2	3	6	1	1	3	11
Thermaceae	1	0	3	1	0	2	20	4
Longimicrobiaceae	1	0	12	1	2	2	11	2
Zavarziniaceae	0	0	6	1	0	0	18	6
Williamwhitmaniaceae	7	5	6	1	5	3	1	2
UCG-010	1	3	11	4	1	4	6	0
Peptococcaceae	1	4	13	3	0	3	6	0
Thermosynechococcaceae	3	9	0	1	0	1	3	12
Syntrophorhabdaceae	1	2	13	1	2	2	8	0
Subgroup_2	3	1	6	14	4	0	0	0
PLTA13	0	0	5	0	0	0	12	10
Brevibacteriaceae	9	1	2	1	9	1	2	1
Gemellaceae	6	0	2	9	3	2	0	4
Carnobacteriaceae	5	3	1	6	1	8	0	1
MBNT15	1	0	3	1	1	0	10	9
Rs-M59_termite_group	1	1	14	0	0	1	7	0
Leptotrichiaceae	8	4	2	3	1	2	1	3
cvE6	1	0	3	0	0	0	17	3
Raineyaceae	3	17	0	0	1	0	1	1
Listeriaceae	0	0	1	22	0	0	0	0
Hydrogenedensaceae	1	0	3	1	1	0	5	12
Succinivibrionaceae	11	0	2	0	10	0	0	0
Thioalkalispiraceae	0	0	9	0	0	0	3	11
Xiphinematobacteraceae	3	3	1	4	1	1	1	9
Frankiaceae	1	0	3	0	1	0	5	10
S085	1	0	3	0	0	0	8	8
SJA-28	0	6	2	1	1	1	0	8
Helicobacteraceae	0	0	7	11	1	0	0	0
Limnochordaceae	0	0	11	0	1	0	7	0
D05-2	0	0	6	3	1	3	0	5
Thiomicrospiraceae	0	2	8	0	0	2	6	0
Koribacteraceae	3	0	7	1	1	3	0	2
Acidothermaceae	2	0	3	1	9	2	0	0
Barnesiellaceae	0	0	3	10	3	0	0	1
JG30-KF-CM66	0	0	4	1	0	0	5	7
Sneathiellaceae	0	0	12	0	0	0	4	1
Rubrobacteriaceae	5	1	0	7	3	0	0	0
Obscuribacteraceae	0	0	2	0	0	0	5	9
Desulfuribacillaceae	3	3	0	4	0	6	0	0
Gracilibacteraceae	0	2	7	0	1	4	2	0
Methyloligellaceae	1	1	2	1	1	1	2	7
Clade_I	0	0	2	13	1	0	0	0
p-251-o5	3	2	1	5	3	1	0	0
JS1	0	0	8	0	0	2	5	0
OLB14	0	0	1	1	0	0	2	11
Acholeplasmataceae	2	1	1	4	0	6	0	1
Thermoactinomycetaceae	1	4	3	0	0	2	5	0
Amb-16S-1323	0	0	1	1	0	0	0	13
MWH-UniP1_aquatic_group	0	0	0	15	0	0	0	0
Subgroup_7	1	0	2	0	0	5	2	4
Actinomarinaceae	0	0	1	11	0	2	0	0
OPB41	5	1	0	1	5	1	0	1
Aerococcaceae	3	0	1	6	1	0	0	3
Garciellaceae	2	5	0	0	0	7	0	0
Hydrogenophilaceae	2	0	7	2	1	0	2	0
Acidobacteriaceae_(Subgroup_1)	0	0	6	2	3	1	0	1
Solibacteraceae	0	1	1	1	1	0	1	8
Syntrophaceae	1	0	6	0	0	2	4	0
Fusibacteraceae	0	1	0	2	1	1	2	6
Candidatus_Zambryskibacteria	0	0	1	0	0	0	12	0
Parvibaculaceae	1	0	3	0	1	3	4	1
Leptospiraceae	0	0	4	0	1	1	5	2
Pyrinomonadaceae	2	0	1	0	3	3	1	2
Thermoanaerobaculaceae	0	0	6	1	0	1	2	2
Gastranaerophilales	0	0	0	10	0	0	0	2
MAT-CR-H4-C10	2	1	4	0	0	2	3	0
Micavibrionaceae	0	0	2	4	1	1	1	3
1013-28-CG33	0	0	6	0	0	0	6	0
Terrimicrobiaceae	0	0	1	0	0	0	8	3
Sericytochromatia	0	0	1	0	0	0	5	5
FCPU426	0	0	2	0	0	0	7	2
Leuconostocaceae	2	0	0	1	3	1	2	2
Caloramatoraceae	1	0	1	4	0	2	1	2
Eubacteriaceae	1	1	3	0	3	1	2	0
B55-F-B-G02	0	2	4	0	0	2	3	0
Sulfobacillaceae	4	0	0	0	6	0	1	0
Dojkabacteria	0	0	7	0	0	0	3	1
Magnetospirillaceae	2	4	0	0	1	1	2	1
Nitrincolaceae	2	0	2	4	2	1	0	0
Nostocaceae	5	2	0	0	0	1	0	2
SRB2	2	3	0	2	0	3	0	0
Armatimonadaceae	1	3	1	1	1	0	1	1
Armatimonadales	0	0	0	9	0	0	0	0
PHOS-HE36	3	1	0	1	3	1	0	0
Gloeocapsaceae	3	5	0	0	0	1	0	0
Babeliaceae	0	0	3	2	0	0	2	2
Geodermatophilaceae	2	0	1	0	0	2	2	1
Cyanobiaceae	2	0	1	3	1	1	0	0
Desulfarculaceae	2	1	0	0	5	0	0	0
D8A-2	0	1	4	0	0	0	3	0
Anaeromyxobacteraceae	0	0	2	1	0	0	1	4
Azospirillales_Incertae_Sedis	0	0	2	1	0	0	4	1
S25-593	1	1	0	5	1	0	0	0
Methylomonadaceae	4	0	0	0	3	1	0	0
AKYG1722	1	0	0	0	0	1	0	5
SHA-26	1	0	1	3	0	1	0	1
Vermiphilaceae	1	1	1	0	2	0	1	1
SAR116_clade	0	0	0	7	0	0	0	0
Pseudoalteromonadaceae	1	0	0	0	0	0	0	6
T34	3	0	0	0	4	0	0	0
Subgroup_17	1	0	0	0	0	0	0	5
Arcobacteraceae	2	0	1	0	2	1	0	0
SBR1031	1	0	0	1	0	0	2	2
Desulfatiglandaceae	1	0	0	1	4	0	0	0
Desulfosarcinaceae	0	0	3	0	0	0	3	0
Desulfurivibrionaceae	1	1	1	1	1	1	0	0
Endomicrobiaceae	1	0	2	1	1	0	1	0
Lineage_Iia	0	1	1	0	0	0	3	1
Desulfitibacteraceae	0	1	4	0	0	0	1	0
Elsteraceae	0	0	0	0	0	0	3	3
Clade_II	0	0	0	5	0	1	0	0
Pseudohongiellaceae	2	0	0	3	1	0	0	0
Subgroup_25	0	0	3	1	1	0	0	0
Xenococcaceae	1	2	0	0	0	0	0	2
Lineage_Iib	1	1	0	0	1	0	0	2
RsaHf231	1	0	2	1	0	1	0	0
Acidaminobacteraceae	0	0	0	1	0	0	1	3
Desulfitobacteriaceae	3	0	0	1	1	0	0	0
Syntrophobotulaceae	0	0	3	0	0	1	1	0
Dethiobacteraceae	0	0	2	0	0	2	1	0
BD2-11_terrestrial_group	0	0	0	5	0	0	0	0
Candidatus_Kaiserbacteria	0	0	0	0	0	0	5	0
Defluviicoccaceae	1	0	0	0	0	1	0	3
Fodinicurvataceae	0	0	0	0	0	0	0	5
KF-JG30-B3	0	0	0	0	0	0	0	5
Saccharospirillaceae	0	0	1	1	1	1	0	1
UBA10353_marine_group	0	0	1	4	0	0	0	0
Sva0485	2	0	0	0	3	0	0	0
WCHB1-41	0	0	0	0	0	0	0	5
Subgroup_11	0	0	2	1	0	0	0	1
Dermabacteraceae	0	1	2	1	0	0	0	0
F082	1	0	0	2	1	0	0	0
053A03-B-DI-P58	0	0	1	0	0	0	3	0
Campylobacteraceae	0	0	1	1	0	0	0	2
Herpetosiphonaceae	0	0	1	0	0	0	3	0
Gitt-GS-136	0	0	1	0	0	0	1	2
C0119	1	0	1	2	0	0	0	0
JG30-KF-AS9	0	0	1	2	0	0	0	1
Ktedonobacteraceae	1	0	1	1	0	0	0	1
Vampirovibrionales	0	1	0	1	0	0	0	2
Desulfuromonadaceae	0	0	3	0	0	0	1	0
Syntrophotaleaceae	0	0	3	0	0	0	1	0
Brevibacillaceae	0	0	0	2	0	1	0	1
Izemoplasmataceae	0	0	2	0	0	0	2	0
Vagococcaceae	1	0	2	0	0	0	0	1
RF39	0	0	0	3	1	0	0	0
Anaerofustaceae	0	0	2	0	0	0	2	0
Desulfitobacteriales	0	0	3	0	0	0	1	0
S0134_terrestrial_group	0	0	2	1	0	0	1	0
UASB-TL25	0	0	0	0	0	0	0	4
Elioraeaceae	1	1	0	0	0	1	0	1
AT-s3-44	0	0	2	0	0	0	1	1
AB1	1	0	1	0	0	0	1	1
Halothiobacillaceae	1	0	0	0	1	2	0	0
KF-JG30-C25	1	2	0	0	1	0	0	0
DEV007	0	3	0	0	0	0	0	1
Thermomonosporaceae	1	0	0	0	1	0	1	0
BSV26	0	0	2	0	0	0	1	0
Sulfurovaceae	1	1	0	0	1	0	0	0
AKIW781	0	0	1	2	0	0	0	0
Desulfobaccaceae	0	0	0	0	0	1	1	1
Elusimicrobiaceae	0	0	0	3	0	0	0	0
Salisediminibacteriaceae	2	0	0	1	0	0	0	0
Caldalkalibacillaceae	0	0	2	1	0	0	0	0
Izemoplasmatales	0	1	1	0	0	0	1	0
Thermicanaceae	0	0	0	2	0	1	0	0
Thermincolaceae	1	0	0	1	1	0	0	0
Latescibacterota	1	0	0	0	0	1	0	1
Rokubacteriales	0	0	1	0	0	0	0	2
4-29-1	0	0	1	0	0	1	0	1
Parvularculaceae	1	0	0	0	0	0	1	1
Idiomarinaceae	0	0	0	1	0	0	0	2
Aquaspirillaceae	1	0	0	0	2	0	0	0
Gallionellaceae	0	0	2	0	1	0	0	0
Porticoccaceae	0	0	2	0	0	0	1	0
EPR3968-O8a-Bc78	0	0	2	0	0	1	0	0
Litoricolaceae	0	0	0	3	0	0	0	0
SAR86_clade	0	0	0	3	0	0	0	0
Omnitrophaceae	0	3	0	0	0	0	0	0
DS-100	0	0	0	0	0	0	0	2
Subgroup_22	0	0	1	0	0	1	0	0
Coriobacteriales_Incertae_Sedis	0	0	0	1	0	0	1	0
RBG-16-55-12	0	0	1	0	0	0	1	0
Porphyromonadaceae	0	0	1	0	0	0	0	1
Rs-E47_termite_group	0	0	1	1	0	0	0	0
SB-5	0	0	0	0	0	0	1	1
SM1A07	0	0	1	0	0	0	1	0
Rhodothermaceae	1	0	0	0	0	0	0	1
Silvanigrellaceae	0	0	1	0	0	0	1	0
MSB-5E12	0	0	1	0	0	0	1	0
W27	0	1	0	0	0	1	0	0
Defluviitaleaceae	0	0	0	2	0	0	0	0
Proteiniboraceae	0	0	0	0	0	2	0	0
Thermoanaerobacteraceae	0	0	0	1	0	1	0	0
AKAU4049	1	0	0	0	1	0	0	0
Methylomirabilaceae	0	0	1	0	1	0	0	0
WX65	0	0	0	0	0	0	0	2
Candidatus_Daviesbacteria	0	0	2	0	0	0	0	0
CPla-3_termite_group	0	0	0	0	0	0	2	0
PS1_clade	0	2	0	0	0	0	0	0
EF100-94H03	0	0	0	0	0	0	0	2
Puniceispirillales_Incertae_Sedis	0	0	1	0	0	0	1	0
Acidithiobacillaceae	1	0	0	0	1	0	0	0
A21b	0	0	0	0	0	1	1	0
CHAB-XI-27	0	0	0	0	0	0	2	0
KI89A_clade	0	0	0	0	0	0	0	2
Nitrosococcaceae	0	0	2	0	0	0	0	0
Oleiphilaceae	0	0	0	0	0	0	0	2
OM182_clade	0	0	0	2	0	0	0	0
FFCH16263	1	0	0	0	0	0	0	0
p-2534-18B5_gut_group	1	0	0	0	0	0	0	0
Hymenobacteraceae	0	0	1	0	0	0	0	0
CWT_CU03-E12	0	1	0	0	0	0	0	0
Caldatribacteriaceae	0	0	1	0	0	0	0	0
UBA12409	0	0	0	0	0	0	0	1
Entotheonellaceae	0	1	0	0	0	0	0	0
Marinococcaceae	1	0	0	0	0	0	0	0
Haloplasmataceae	0	0	0	0	0	0	0	1
Limnochordia	0	0	0	1	0	0	0	0
Thermovenabulales	0	0	1	0	0	0	0	0
MidBa8	0	0	1	0	0	0	0	0
Candidatus_Peribacteria	0	0	0	0	0	0	0	1
Thalassobaculaceae	0	1	0	0	0	0	0	0
Chromatiaceae	0	0	0	0	0	0	0	1
MVP-15	0	0	1	0	0	0	0	0
Kosmotogaceae	0	0	1	0	0	0	0	0
Puniceicoccaceae	0	0	0	0	0	0	0	1

## Sheet: Genus
Table S3. Numbers of bacterial sequences assigned to each taxonomic rank (phylum, class, order, family, genus, species) across all sample categories.
Genus	Mean sequence count of each taxonomic rank per sample group
	AeyL	AlbL	AeyF	AeyM	AlbF	AlbM	AeyW	AlbW
Wolbachia	1517	3246	5619	2373	70744	92808	782	451
Aeromonas	42	161	41699	907	47313	1015	432	849
Serratia	19007	59532	64	162	3457	2561	2	59
Lysinibacillus	37507	845	17	344	496	3	41	2
Escherichia-Shigella	1308	9	12173	16732	1460	958	150	373
C39	10972	4074	9	257	6	445	37	544
Nitrospira	24	36	658	14	16	46	12603	321
Clostridium_innocuum_group	407	1	4384	6843	321	383	66	220
Blautia	345	7	2511	5840	563	617	81	371
Saccharimonadales	54	18	363	14	9	26	8201	386
Gemmobacter	439	2633	19	128	87	228	284	5220
Aquabacterium	5742	966	101	133	57	52	334	220
Parasutterella	451	3	1903	4028	480	348	63	200
RBG-13-54-9	117	53	432	7	59	33	5980	232
Flectobacillus	2365	3954	0	14	23	39	0	24
Coprobacillus	197	0	2161	3253	147	186	39	112
SM1A02	3	2	212	3	0	9	5304	101
Comamonas	14	3	17	31	2	4	197	5321
Clostridioides	357	1	1818	2105	411	438	85	245
Novosphingobium	596	150	797	268	258	566	1314	1499
Coetzeea	4681	279	1	119	0	0	1	46
Rhodobacter	536	305	240	151	42	152	969	2437
Shinella	364	1726	698	249	801	722	40	52
Roseomonas	102	260	385	95	84	140	1879	1292
Acinetobacter	58	19	73	360	71	43	27	3301
Dysgonomonas	221	3492	1	0	182	2	3	0
Klebsiella	156	3	1386	1870	178	130	22	53
Bifidobacterium	19	4	144	3338	103	70	2	86
Sandaracinobacter	301	212	455	62	212	116	1535	600
Vicinamibacteraceae	15	13	318	9	2	28	2768	272
Pedosphaeraceae	4	35	122	2	1	4	3121	91
Hydrogenophaga	320	2033	30	30	144	119	68	468
Castellaniella	0	11	9	3113	1	17	3	0
Reyranella	41	14	492	32	6	72	1693	764
Morganella	124	1	1048	1405	149	124	16	37
Stenotrophomonas	14	4	227	665	1393	100	353	104
Runella	82	2250	16	7	18	55	167	179
Bacteroides	26	3	75	2423	67	39	1	21
Akkermansia	54	0	1011	1447	30	45	15	50
PeM15	1678	168	82	75	31	13	218	222
Megasphaera	1	0	0	2352	1	0	0	1
Streptococcus	76	10	101	1955	69	64	6	73
Enterococcus	135	1	744	1009	132	140	19	82
Bosea	76	206	411	139	229	358	476	361
Ferruginibacter	169	110	79	5	8	18	1547	163
Bradyrhizobium	22	9	392	11	12	72	1267	266
Chloroplast	212	995	30	67	18	144	231	329
SWB02	8	8	209	5	7	53	1498	146
Azospirillum	192	741	5	74	3	241	57	540
Bryobacter	15	25	239	12	9	27	1150	249
Chryseobacterium	118	1395	11	3	82	6	63	11
Paucibacter	100	158	350	21	48	47	812	136
Pseudomonas	458	96	92	296	260	82	50	335
Hyphomicrobium	39	49	287	28	19	52	816	327
Emticicia	89	746	15	12	37	10	204	496
Dubosiella	87	0	491	784	74	73	17	55
env.OPS_17	65	351	47	8	0	25	867	207
Citrobacter	52	7	397	970	53	36	6	21
Oligoflexus	14	14	15	34	1	14	210	1226
Blastocatella	30	12	117	13	5	13	1046	273
Hirschia	19	24	183	27	5	47	806	397
Gemmatimonas	14	29	162	13	11	22	1120	134
UKL13-1	1186	121	1	84	1	1	1	107
Georgenia	9	22	968	6	2	37	420	0
Rhodovastum	3	5	184	3	1	27	1092	115
Sphingomonas	34	26	321	132	103	268	299	204
Methylobacterium-Methylorubrum	13	12	64	947	13	26	229	57
Phenylobacterium	10	3	188	12	8	38	898	123
Allorhizobium-Neorhizobium-Pararhizobium-Rhizobium	442	306	68	31	171	49	95	101
Phreatobacter	127	414	52	31	125	63	150	270
M55-D21	21	415	0	14	1	755	1	0
SD04E11	14	4	167	1	6	39	873	73
A4b	81	12	153	6	14	10	827	62
Gemmata	7	1	61	3	0	5	1018	56
Faecalibacterium	59	1	92	773	124	49	3	45
Flavobacterium	350	201	79	30	43	56	179	164
Mycobacterium	640	130	33	19	77	20	113	53
Fimbriimonadaceae	11	19	132	10	3	14	730	165
Kosakonia	40	1	340	546	61	46	4	17
Devosia	15	12	177	91	70	178	222	281
Pleomorphomonas	10	1	2	84	2	24	79	821
BIrii41	4	3	171	2	1	19	666	95
Christensenellaceae_R-7_group	24	24	256	67	19	33	146	363
R7C24	5	3	106	2	2	14	638	161
Subdoligranulum	11	0	114	590	67	53	0	61
Bdellovibrio	18	24	116	11	10	15	390	273
Clostridium_sensu_stricto_12	15	6	1	814	9	0	4	6
Brevundimonas	116	27	102	21	52	49	300	178
B1-7BS	29	22	87	5	16	12	411	226
Haliangium	1	0	112	0	1	28	571	63
Porphyrobacter	25	24	28	71	9	30	90	498
Fusicatenibacter	6	1	61	585	41	33	0	46
Alcaligenes	18	333	3	8	1	407	0	1
Fusobacterium	6	2	6	728	5	7	1	5
Defluviimonas	64	309	49	8	75	13	150	81
Methylibium	3	2	42	0	1	5	654	32
Methylophilus	116	284	39	10	80	38	82	88
Proteiniphilum	79	215	8	49	4	370	1	0
Polynucleobacter	89	24	119	4	2	10	404	74
Ohtaekwangia	6	14	0	4	2	3	9	672
Pseudoxanthomonas	28	18	160	47	47	80	197	121
NS11-12_marine_group	160	34	27	9	3	7	395	57
Lachnoclostridium	10	1	24	591	30	14	3	17
Dinghuibacter	8	6	24	2	1	4	539	101
Geobacter	149	125	51	17	176	149	8	2
Lautropia	108	33	85	12	4	15	340	80
Dorea	5	1	81	467	29	38	0	46
Caulobacter	10	4	120	23	27	73	294	115
Sphingopyxis	63	13	118	30	39	70	222	103
Rubellimicrobium	41	100	12	15	32	12	52	383
Cytophaga	4	21	37	3	0	7	538	31
Ga0077536	3	3	190	1	3	18	349	51
Ruminococcus_torques_group	14	0	73	377	65	40	2	36
Brevifollis	1	15	42	0	1	5	505	33
MBA03	58	161	3	47	1	316	1	0
Alkanindiges	108	343	1	0	118	8	2	4
Sutterella	3	0	2	574	1	0	0	1
Muribaculaceae	19	0	20	510	13	11	1	6
Herbinix	24	163	2	20	0	363	0	1
Lactobacillus	121	27	56	238	42	58	4	26
Thiopseudomonas	26	194	8	16	0	316	5	0
Sediminibacterium	56	26	21	10	2	10	331	108
Ancylobacter	1	2	170	72	71	196	10	25
Kaistia	11	14	122	4	13	29	230	120
Fimbriiglobus	6	5	11	5	1	6	240	243
Bacillus	72	83	30	35	18	33	46	199
hgcI_clade	3	1	110	5	2	7	343	36
Pedomicrobium	10	5	81	10	6	17	257	116
SH3-11	8	4	23	3	4	2	413	39
Clostridia_UCG-014	24	0	120	269	30	35	3	13
0319-6G20	9	3	72	8	5	5	258	129
Gordonia	225	41	52	11	5	6	124	24
Lacibacter	167	111	14	4	1	7	78	102
DEV114	0	1	27	1	0	2	443	8
Curvibacter	279	35	10	8	3	9	89	40
Prosthecobacter	6	87	20	5	0	9	234	110
Chthonobacter	14	31	1	19	4	11	24	362
Eubacterium_hallii_group	7	1	77	239	41	42	2	49
Erysipelatoclostridium	25	0	154	215	19	21	3	10
Parabacteroides	9	1	8	403	11	6	2	2
Anaerostipes	13	0	68	260	29	34	1	36
Vogesella	100	282	0	1	9	44	1	3
Thermovirga	4	11	280	4	0	17	122	1
WCHB1-32	3	1	0	15	1	4	12	402
Sphingobium	14	4	76	20	16	55	163	87
Aquicella	1	0	82	0	0	11	287	51
SC-I-84	8	4	37	3	6	6	197	158
Acidibacter	9	6	56	7	2	9	269	57
Iamia	31	47	43	16	16	23	93	136
Rubrivivax	5	2	27	1	0	3	318	47
Acidovorax	29	185	20	3	7	19	46	91
Dechloromonas	83	119	5	12	11	16	16	131
Mesorhizobium	20	27	66	5	11	13	176	60
Caldicoprobacter	55	101	2	54	0	161	2	0
Agathobacter	26	1	33	204	61	22	1	19
Rudanella	8	95	0	3	0	8	8	241
Oscillibacter	2	1	2	351	2	1	0	1
Erysipelotrichaceae_UCG-003	1	0	25	303	10	8	0	9
Providencia	11	0	87	231	9	8	2	4
Kapabacteriales	2	3	32	3	3	6	243	54
Phaeodactylibacter	7	96	1	0	5	0	1	232
Methylocystis	20	32	34	14	32	22	79	106
Piscinibacter	32	18	17	3	1	5	218	42
Tepidisphaeraceae	1	7	0	7	2	0	3	315
OM190	12	1	26	1	2	4	273	14
Pajaroellobacter	6	9	72	2	5	7	204	23
MND1	1	0	64	0	0	12	218	30
Coxiella	2	2	26	213	1	9	56	16
A0839	14	3	40	5	3	12	190	57
Roseobacter_clade_CHAB-I-5_lineage	31	94	0	9	18	7	13	152
Longivirga	29	11	59	4	5	8	143	62
Ilumatobacter	13	22	7	9	1	6	24	235
Ralstonia	28	16	60	44	24	53	60	29
Deinococcus	8	12	2	11	1	2	7	266
CL500-29_marine_group	8	12	9	6	4	5	38	207
Romboutsia	21	5	40	132	47	24	6	13
Propionivibrio	11	39	0	18	0	12	11	197
Parapusillimonas	0	0	0	287	0	0	0	0
Terrimonas	18	24	17	4	5	12	122	83
Desulfovibrio	10	3	1	24	7	7	19	212
Roseococcus	21	63	16	11	0	23	91	57
Rahnella1	79	12	165	7	3	2	3	5
Edaphobaculum	39	66	21	6	15	12	81	33
Croceicoccus	4	7	49	11	13	37	50	99
Clostridium_sensu_stricto_1	35	32	20	89	25	14	31	21
Lacunisphaera	2	19	14	3	0	4	101	124
Lachnospiraceae_NK4A136_group	7	0	13	225	10	4	1	5
Legionella	8	3	59	4	4	10	113	64
Tropicimonas	11	22	5	18	1	5	37	165
CCM19a	1	1	3	0	2	0	3	241
Altererythrobacter	14	2	22	13	11	25	12	146
TRA3-20	3	6	33	2	3	5	164	28
Nitrosomonas	0	1	71	0	1	5	139	26
Lysobacter	31	14	3	20	1	6	26	141
Lachnospiraceae_UCG-004	0	0	2	231	1	3	0	1
Amaricoccus	5	11	7	6	8	5	8	187
Candidatus_Alysiosphaera	27	13	27	10	5	11	66	73
Variovorax	11	33	33	40	17	20	34	43
Veillonella	9	1	20	141	10	12	2	33
Georgfuchsia	2	0	41	2	0	8	159	11
CCD24	1	1	33	1	2	4	107	73
oc32	2	1	31	1	0	4	160	15
Haemophilus	7	1	20	134	17	10	1	23
Niveibacterium	6	11	0	16	0	4	9	165
IMCC26207	16	41	27	12	15	42	25	32
HN-HF0106	22	56	2	32	0	96	1	0
Arenimonas	23	5	2	13	4	7	21	129
Pirellula	2	12	8	3	2	6	116	51
37-13	25	11	10	0	0	4	126	22
Asticcacaulis	10	2	46	28	29	66	2	12
NS9_marine_group	15	7	12	15	0	3	89	51
Aquitalea	150	22	0	9	0	0	1	9
Ramlibacter	8	13	13	3	6	4	97	47
Nakamurella	8	1	33	1	0	4	108	33
Methyloversatilis	8	3	19	27	7	7	100	17
Silanimonas	14	29	0	22	1	11	21	90
IMCC26256	8	1	27	6	3	5	79	57
Corynebacterium	19	4	37	65	16	18	3	24
JG30-KF-CM45	8	3	23	7	5	17	81	40
Alsobacter	3	1	6	19	1	5	35	113
Cavicella	70	10	30	1	17	2	48	4
Bordetella	151	12	0	6	0	0	1	7
Chthoniobacter	3	12	9	1	2	3	37	110
Nocardioides	9	16	17	12	6	14	67	35
Candidatus_Megaira	0	0	51	0	1	5	104	14
Roseburia	7	1	19	100	23	8	0	16
Cutibacterium	38	0	16	58	44	6	4	6
mle1-27	25	9	25	1	5	7	83	15
Rikenellaceae_RC9_gut_group	3	2	59	70	3	2	30	0
Frankiales	3	5	35	2	1	3	96	23
Mitochondria	11	3	12	109	3	9	13	8
Caproiciproducens	0	0	1	166	0	0	0	0
ST-12K33	1	3	101	0	0	4	57	0
Aminobacter	9	42	9	2	12	7	19	65
Cellvibrio	16	21	20	12	7	16	24	49
Smithella	5	4	95	1	7	6	46	0
Babeliales	3	1	16	0	2	0	137	4
Clostridium_sensu_stricto_2	0	0	0	161	0	0	0	0
Rhizobacter	13	5	11	3	1	2	81	38
Tundrisphaera	2	3	5	2	0	0	102	39
Pantoea	7	7	64	61	6	5	1	0
Leucobacter	20	60	18	3	12	2	25	10
Chryseolinea	1	3	1	1	0	1	1	142
WD260	3	0	27	0	3	2	108	7
Demequina	3	14	24	12	16	22	6	52
Monoglobus	7	0	19	77	19	14	0	13
SH-PL14	3	3	13	2	0	2	103	22
WPS-2	7	6	23	5	0	5	56	46
Paludibaculum	4	0	9	2	1	1	83	47
Haliscomenobacter	14	7	3	4	0	1	53	65
SJA-15	6	6	9	2	3	5	33	82
AAP99	2	1	24	0	0	3	105	11
Schlesneria	1	0	11	0	0	1	126	5
Bacteroidetes_vadinHA17	2	2	82	1	0	1	51	0
Limnobacter	12	5	21	22	8	10	50	9
Zoogloea	69	9	12	3	2	2	34	4
Acetitomaculum	0	0	96	1	0	3	33	0
Fluviicola	79	10	6	3	5	5	14	7
Inquilinus	0	0	41	0	0	6	73	9
Pseudarcicella	84	4	2	2	1	0	19	16
Neochlamydia	0	0	7	0	0	1	112	6
NB1-j	1	2	16	2	0	6	53	44
Erythrobacter	1	1	32	9	8	28	32	13
Advenella	80	2	1	37	1	1	0	0
Elev-16S-1166	1	0	13	1	0	2	85	18
ZOR0006	13	91	0	1	0	11	1	3
Oikopleura	1	1	6	1	0	2	85	23
Ruminococcus_gnavus_group	7	1	9	74	13	10	1	3
Butyricicoccus	4	0	10	82	7	6	0	9
Aquisphaera	0	0	4	0	0	0	104	10
Eubacterium_coprostanoligenes_group	20	9	7	37	18	19	1	6
67-14	8	3	25	3	1	5	50	21
Rhodopseudomonas	4	2	16	3	6	8	33	44
Undibacterium	74	7	6	3	4	1	16	5
Alistipes	23	4	11	58	8	5	0	6
Craurococcus-Caldovatus	6	3	9	7	2	6	35	46
Proteus	6	0	34	59	6	5	2	2
Chloronema	89	0	3	2	8	4	5	1
JGI_0000069-P22	7	101	0	0	0	3	0	1
Staphylococcus	11	5	22	41	12	10	2	8
Enhydrobacter	13	3	16	64	10	2	2	1
Syner-01	0	11	56	2	0	14	28	0
Paludisphaera	2	4	9	1	1	3	67	23
Delftia	6	2	12	8	37	6	29	10
Ketobacter	14	46	6	1	16	3	12	12
Luteolibacter	5	14	2	5	2	2	3	77
Ancalomicrobium	3	1	2	9	1	5	13	75
Cellulomonas	5	8	13	7	6	10	18	41
Conexibacter	3	3	29	3	3	2	59	6
Syntrophomonas	1	5	66	2	0	6	28	0
Perlucidibaca	47	9	5	22	17	1	6	1
Clostridia_vadinBB60_group	7	29	8	17	3	42	1	0
DMER64	3	12	51	1	0	11	28	0
Allisonella	0	0	0	106	0	0	0	0
Blfdi19	3	1	19	4	2	6	50	21
OM60(NOR5)_clade	12	12	6	9	13	4	22	28
Megamonas	14	1	9	42	28	5	0	5
Agromyces	2	5	19	5	4	19	27	21
Absconditabacteriales_(SR1)	3	1	1	1	0	2	50	44
Ochrobactrum	5	4	23	9	11	20	11	18
SM2D12	4	2	8	10	0	5	28	44
Alloprevotella	5	0	5	83	2	2	1	1
Algoriphagus	5	1	2	3	0	2	5	81
Azospira	1	4	0	1	0	0	1	92
Prevotella	21	0	19	32	17	4	1	4
KD4-96	4	6	8	3	5	3	18	50
P3OB-42	5	1	22	0	1	3	58	7
Azonexus	7	29	0	3	5	3	3	47
Xanthobacter	5	10	6	2	4	4	21	41
Luteitalea	4	0	7	2	0	2	49	27
Desulfomicrobium	3	22	21	1	1	26	15	2
Opitutus	1	30	4	0	0	2	44	10
Peredibacter	61	13	1	2	7	0	4	2
Agitococcus_lubricus_group	0	0	15	0	0	2	66	7
Ahniella	0	0	19	1	1	4	56	8
Pedobacter	2	3	20	7	7	15	26	8
Chroococcidiopsis_PCC_7203	41	28	1	0	7	2	1	8
MN_122.2a	3	5	5	53	3	5	1	13
Marinimicrobia_(SAR406_clade)	0	0	0	86	0	0	0	0
Anaerovorax	4	14	21	9	2	23	9	3
Intestinimonas	0	1	1	80	0	1	1	0
Turicibacter	3	0	12	52	2	10	0	4
Uliginosibacterium	4	1	0	6	0	3	4	65
Microbacterium	18	11	14	9	8	9	5	8
Arsenicibacter	6	17	6	2	2	7	13	29
OM43_clade	0	0	0	82	0	0	0	0
Clostridium_sensu_stricto_3	16	4	22	4	1	3	18	13
Planctopirus	0	0	5	0	0	1	69	6
Rhizorhapis	5	3	18	0	4	3	37	11
Streptomyces	3	2	21	4	2	5	36	7
TM7x	4	0	21	38	4	5	6	2
Flavisolibacter	59	7	2	2	0	0	2	6
Candidatus_Chloroploca	62	1	1	0	4	1	4	5
Candidatus_Finniella	8	51	1	0	0	12	1	5
Collinsella	1	0	13	46	6	5	1	4
Amphibacillus	10	20	0	5	0	41	0	0
Mycoplasma	0	0	0	0	0	0	0	76
Chitinimonas	15	47	0	0	1	9	2	2
Sedimentibacter	2	8	34	2	1	11	15	0
Candidatus_Amoebophilus	0	0	11	0	0	1	56	4
Inhella	7	39	2	0	2	7	8	7
Nodosilinea_PCC-7104	8	29	0	3	1	6	1	23
Chelativorans	1	8	5	7	2	8	10	30
Oxalobacter	7	0	1	5	0	0	1	57
Paenibacillus	6	17	9	0	2	9	19	8
Ruminococcus	7	5	5	21	11	16	1	4
Nannocystis	2	1	11	0	0	2	48	6
Flavihumibacter	2	7	1	2	1	1	4	51
Microvirga	3	4	8	6	2	5	10	31
Aureimonas	6	2	19	4	7	17	6	8
Lentimicrobium	16	13	7	2	8	21	0	1
Gaiella	3	5	5	2	2	1	21	28
Fermentimonas	3	37	4	3	0	18	2	0
Phaselicystis	3	5	9	0	0	1	46	3
Prosthecomicrobium	3	0	4	3	0	3	27	26
Ureibacillus	39	0	0	26	0	0	0	0
Sulfurospirillum	0	1	41	1	0	0	21	0
Ferrovibrio	0	0	21	0	0	4	36	3
Geminicoccus	3	7	18	0	1	1	23	11
Clostridium_sensu_stricto_8	2	1	6	7	3	8	2	34
Phascolarctobacterium	5	0	6	44	2	2	0	4
Dongia	1	0	1	0	0	2	6	53
Fastidiosipila	1	7	29	1	0	12	12	0
Taonella	0	0	22	0	0	1	31	8
DSSD61	0	0	7	0	0	0	53	2
JGI_0001001-H03	2	1	4	0	0	0	43	11
Labrys	0	2	2	1	2	2	8	44
Paracoccus	1	1	20	5	2	6	8	18
Actinomyces	1	1	14	25	4	5	5	5
Dialister	15	0	8	17	14	2	0	4
Fictibacillus	1	4	1	7	1	4	4	36
Clostridium_sensu_stricto_11	10	15	0	6	1	6	3	16
Parasegetibacter	1	3	15	5	10	16	1	4
Burkholderia-Caballeronia-Paraburkholderia	8	3	18	10	3	7	3	3
Atopobium	6	1	18	1	7	3	16	2
Ellin6067	6	1	8	2	5	2	20	10
Marinilabiliaceae	22	15	1	6	0	9	0	0
LWQ8	4	1	4	3	0	1	17	23
Clostridium_sensu_stricto_5	17	2	1	6	1	1	6	17
Sporomusa	2	2	0	4	1	0	2	40
Micrococcus	8	6	12	5	9	7	1	2
Tissierella	7	15	1	4	4	19	0	0
JG36-GS-52	0	1	0	0	1	0	1	47
DTU014	1	2	30	0	0	2	14	0
Vulcaniibacterium	5	0	16	9	11	8	0	0
SAR324_clade(Marine_group_B)	0	0	1	18	1	0	2	27
Steroidobacter	0	0	5	1	1	1	17	23
Leptolyngbya_ANT.L52.2	16	12	0	1	1	1	4	12
Neisseria	20	0	3	2	7	2	3	10
BD1-7_clade	3	1	7	0	1	2	26	7
Sporichthya	4	1	7	1	2	1	18	12
Sporanaerobacter	1	0	0	45	0	0	0	0
Pseudorhodoferax	2	2	10	7	7	12	2	4
Pseudonocardia	4	3	4	1	2	2	21	8
PB19	1	0	9	1	0	0	25	9
Flavonifractor	7	0	2	23	11	1	0	1
Rheinheimera	17	10	2	1	7	3	4	1
SC103	0	0	23	0	0	1	21	0
Micromonospora	3	18	1	1	1	5	2	13
Petrimonas	8	16	5	1	4	10	0	0
Arcicella	39	3	0	1	0	0	0	1
Cloacibacterium	4	21	0	2	1	1	2	13
Anaerobacterium	1	0	1	5	3	1	3	30
Colidextribacter	6	0	1	25	11	0	0	1
Achromobacter	10	1	6	5	0	2	13	7
Aminobacterium	2	3	20	0	3	5	10	0
Niveispirillum	0	0	9	1	0	2	24	6
EV818SWSAP88	5	2	1	2	3	1	3	25
Nevskia	8	4	7	1	2	4	14	2
Sphaerochaeta	0	2	26	0	0	2	12	0
Aridibacter	2	1	1	0	1	2	4	30
UCG-002	5	1	6	14	9	3	0	3
Rhodoplanes	2	1	3	0	1	1	13	20
Novispirillum	8	23	0	0	0	8	0	1
IS-44	0	0	0	13	0	0	0	27
Mucispirillum	0	0	0	39	0	0	0	0
UCG-005	4	0	3	21	7	2	0	2
WD2101_soil_group	0	1	2	0	0	0	14	22
Pusillimonas	4	8	8	1	1	8	9	0
Mitsuaria	5	1	1	0	0	0	19	13
Rothia	3	0	8	8	2	4	0	13
Truepera	2	1	10	12	0	0	5	8
Desulfobulbus	6	2	12	2	8	1	6	1
Tumebacillus	4	6	8	8	5	4	0	3
Hungateiclostridium	1	0	1	4	1	1	2	28
Eubacterium_eligens_group	6	0	4	12	13	2	0	1
Sumerlaea	0	0	1	0	0	0	1	36
Holophagaceae	1	0	0	4	0	1	3	28
Incertae_Sedis	4	1	7	11	8	4	1	1
vadinHA49	0	0	0	1	0	0	9	27
Thermomonas	4	3	1	4	0	2	4	19
Rhodococcus	8	6	4	2	2	1	9	4
Afipia	1	0	5	0	0	2	24	4
Schlegelella	6	1	7	8	7	4	2	1
Massilia	0	0	3	3	2	4	5	19
TK10	0	2	6	3	2	1	11	10
Psychrobacillus	15	13	1	1	2	3	0	0
Proteiniclasticum	8	5	4	3	9	5	0	1
Allobaculum	1	0	2	30	1	0	0	0
Eubacterium_ventriosum_group	5	0	3	12	10	1	0	3
Sellimonas	1	1	6	16	3	2	0	5
Pir4_lineage	1	0	2	0	1	0	12	18
Rhodopirellula	1	1	1	3	2	1	2	23
Leeia	26	3	0	1	0	0	1	3
Negativibacillus	0	0	0	33	0	0	0	0
Gracilibacteria	0	1	0	1	0	0	1	30
Vibrio	7	1	2	5	1	4	0	13
Aeromicrobium	2	2	5	1	3	3	14	2
Paludibacter	3	7	0	1	1	2	1	16
Cryptanaerobacter	0	0	22	0	0	1	8	0
Rubritepida	3	14	1	0	0	5	2	6
Zavarzinia	0	0	6	1	0	0	18	6
Anaerostignum	2	0	0	27	1	0	0	0
UCG-010	1	3	11	4	1	4	6	0
Sandaracinus	4	7	3	1	4	1	6	4
Odoribacter	0	0	0	29	0	0	0	0
OM27_clade	0	0	6	1	1	1	6	14
JSC-12	10	4	3	1	0	0	10	1
Cyanothece_PCC_7425	3	9	0	1	0	1	3	12
Syntrophorhabdus	1	2	13	1	2	2	8	0
Lachnospira	0	0	7	13	2	5	0	2
NK4A214_group	1	2	8	10	1	5	1	1
Pelotomaculum	1	4	14	0	0	5	5	0
Subgroup_2	3	1	6	14	4	0	0	0
Eggerthella	0	0	3	22	2	1	0	0
Leptolyngbya_PCC-6307	4	2	0	1	0	1	2	18
Meiothermus	0	0	3	0	0	2	20	3
Deefgea	3	6	4	0	1	2	11	1
Lachnospiraceae_UCG-010	0	0	3	19	1	2	0	2
Candidatus_Soleaferrea	0	1	0	23	1	2	0	0
Longimicrobiaceae	1	0	12	0	2	0	11	1
Pseudolabrys	1	0	0	0	0	1	0	25
PLTA13	0	0	5	0	0	0	12	10
Treponema	1	0	0	3	2	2	0	19
Lawsonella	3	1	2	15	5	0	0	0
Brevibacterium	9	1	2	1	9	1	2	1
Flexibacter	1	1	1	2	1	2	1	17
Leptolinea	4	7	0	2	4	8	0	1
UCG-004	0	7	1	0	1	17	0	0
Gemella	6	0	2	9	3	2	0	4
CHKCI001	9	0	0	3	14	0	0	0
Caedibacter	2	6	0	3	0	2	3	10
Muribaculum	0	0	0	24	0	0	0	1
Prevotellaceae_UCG-003	1	0	0	23	0	1	0	0
Dyadobacter	0	0	1	2	0	2	3	17
Coprococcus	4	0	1	10	8	2	0	0
MBNT15	1	0	3	1	1	0	10	9
Methylovirgula	3	0	5	0	5	1	6	5
Chitinibacter	5	5	0	1	0	5	1	8
Rs-M59_termite_group	1	1	14	0	0	1	7	0
Anoxybacillus	8	7	1	2	3	2	0	1
Pelagibacterium	0	0	6	3	4	7	0	4
cvE6	1	0	3	0	0	0	17	3
RS25G	1	0	2	0	0	0	20	1
Blvii28_wastewater-sludge_group	4	5	5	0	4	2	1	2
Raineya	3	17	0	0	1	0	1	1
Microcystis_PCC-7914	6	11	0	1	1	1	0	3
Brochothrix	0	0	1	22	0	0	0	0
Lactococcus	3	1	3	4	1	4	1	6
Clostridium_sensu_stricto_7	1	0	0	18	1	1	0	2
Bauldia	0	0	3	0	1	1	9	9
Candidatus_Xiphinematobacter	3	3	1	4	1	1	1	9
Mucilaginibacter	6	3	5	1	3	3	0	1
Bilophila	2	0	1	18	1	0	0	0
Clostridium_sensu_stricto_13	2	5	0	2	5	2	1	5
Eubacterium_siraeum_group	2	0	1	14	3	1	0	1
Candidatus_Saccharimonas	1	0	2	17	1	1	0	0
Candidatus_Bealeia	0	0	8	0	0	1	10	3
Anaplasma	0	0	0	22	0	0	0	0
Azoarcus	6	5	1	0	6	2	0	2
Thauera	6	0	6	3	3	1	2	1
Luteimonas	3	0	2	2	1	1	7	6
Spirosoma	8	3	0	0	0	1	4	5
Chromobacterium	13	4	0	0	3	0	0	1
Jatrophihabitans	1	0	3	0	1	0	5	10
S085	1	0	3	0	0	0	8	8
Alkaliphilus	1	2	10	1	0	1	5	0
Hydrogenedensaceae	1	0	1	1	1	0	4	12
Alteromonas	1	0	7	8	1	2	0	1
Chitinilyticum	1	2	0	2	0	0	0	15
Duganella	5	1	3	0	2	3	3	3
Candidatus_Berkiella	1	2	4	0	2	1	7	3
Panacagrimonas	1	0	2	2	1	1	10	3
SJA-28	0	6	2	1	1	1	0	8
Helicobacter	0	0	7	11	1	0	0	0
Faecalibaculum	2	1	5	6	2	1	1	1
Atopostipes	4	2	1	4	0	7	0	1
Ercella	2	2	9	0	0	3	3	0
Ruminiclostridium	2	4	3	3	1	3	0	3
GCA-900066755	0	0	0	16	2	1	0	0
Limnochordaceae	0	0	11	0	1	0	7	0
Candidatus_Captivus	0	0	8	0	0	0	9	2
mle1-7	3	0	0	2	0	1	3	10
Sulfuritalea	0	1	5	0	0	0	11	2
Nubsella	0	1	6	4	1	6	0	0
Clostridium_sensu_stricto_10	1	1	1	6	0	1	1	7
UBA1819	4	0	1	7	5	1	0	0
Tepidimicrobium	4	3	0	2	0	9	0	0
D05-2	0	0	6	3	1	3	0	5
Thioalkalimicrobium	0	2	8	0	0	2	6	0
Tahibacter	1	4	1	0	2	0	5	5
Candidatus_Koribacter	3	0	7	1	1	3	0	2
Acidothermus	2	0	3	1	9	2	0	0
Aurantisolimonas	4	0	1	0	1	0	9	2
JG30-KF-CM66	0	0	4	1	0	0	5	7
Fibrobacter	0	0	0	1	0	1	1	14
W5053	2	2	7	1	0	3	2	0
CL500-3	3	2	0	1	0	0	2	9
Sneathiella	0	0	12	0	0	0	4	1
966-1	2	1	0	1	0	0	6	7
Nitrosospira	0	0	1	16	0	0	0	0
Rubrobacter	5	1	0	7	3	0	0	0
Elizabethkingia	2	0	3	8	2	1	0	0
Desulfuribacillus	3	3	0	4	0	6	0	0
Lachnoanaerobaculum	4	0	1	0	9	0	0	2
Lachnospiraceae_ND3007_group	1	0	3	8	0	3	0	1
Pygmaiobacter	0	0	0	16	0	0	0	0
Eubacterium_brachy_group	2	1	0	11	1	1	0	0
Quinella	0	0	3	12	0	0	1	0
Roseiarcus	4	0	1	2	5	1	1	2
Methyloligellaceae	1	1	2	1	1	1	2	7
Limibaculum	1	0	0	1	0	1	1	12
Clade_Ia	0	0	2	13	1	0	0	0
Halomonas	1	2	0	1	0	0	3	9
LD29	4	0	3	0	1	1	6	1
p-251-o5	3	2	1	5	3	1	0	0
JS1	0	0	8	0	0	2	5	0
OLB14	0	0	1	1	0	0	2	11
Chalicogloea_CCALA_975	1	4	0	2	0	0	1	7
Epulopiscium	2	6	0	0	3	0	0	4
Peptostreptococcus	0	0	0	1	0	1	0	13
Natronincola	4	1	0	5	0	4	1	0
Parvimonas	3	2	2	1	5	1	0	1
Amb-16S-1323	0	0	1	1	0	0	0	13
Nordella	0	0	0	0	1	0	2	12
MWH-UniP1_aquatic_group	0	0	0	15	0	0	0	0
Janthinobacterium	1	0	2	1	1	0	1	9
Subgroup_7	1	0	2	0	0	5	2	4
Candidatus_Actinomarina	0	0	1	11	0	2	0	0
Oryzihumus	3	2	1	4	2	0	1	1
Nesterenkonia	6	0	1	2	4	1	0	0
Actinomycetospora	2	1	2	1	0	3	2	3
OPB41	5	1	0	1	5	1	0	1
Mariniphaga	0	0	10	0	0	0	4	0
Savagea	0	0	0	14	0	0	0	0
Irregularibacter	2	5	0	0	0	7	0	0
Eubacterium_ruminantium_group	2	0	4	2	3	1	0	2
Anaerococcus	0	0	0	14	0	0	0	0
Sandarakinorhabdus	2	0	6	1	0	0	4	1
Spirochaeta_2	1	0	4	0	0	0	2	7
Candidatus_Solibacter	0	1	1	1	1	0	1	8
Obscuribacteraceae	0	0	1	0	0	0	4	8
Syntrophus	1	0	6	0	0	2	4	0
Lutispora	0	1	7	0	0	3	2	0
Fusibacter	0	1	0	2	1	1	2	6
Candidatus_Zambryskibacteria	0	0	1	0	0	0	12	0
Ideonella	9	1	0	0	3	0	0	0
RB41	2	0	1	0	3	3	1	2
Siphonobacter	1	0	1	0	0	0	8	2
Lacihabitans	3	6	0	0	1	0	0	2
Gastranaerophilales	0	0	0	10	0	0	0	2
Saccharofermentans	3	0	0	0	8	1	0	0
MAT-CR-H4-C10	2	1	4	0	0	2	3	0
Parvibaculum	1	0	3	0	1	3	4	0
Sphingoaurantiacus	1	0	2	1	1	2	0	5
1013-28-CG33	0	0	6	0	0	0	6	0
Anaerobiospirillum	7	0	0	0	5	0	0	0
Fluviicoccus	0	0	3	0	0	1	6	2
Hydrocarboniphaga	0	0	3	0	0	1	7	1
Propionibacterium	4	0	1	0	5	0	1	0
Propionimicrobium	0	1	7	0	0	0	3	0
Barnesiella	0	0	1	8	1	0	0	1
Rikenella	0	0	0	11	0	0	0	0
Taibaiella	0	0	3	2	2	4	0	0
OLB15	0	0	0	1	0	0	0	10
MTP1	5	1	0	0	1	1	1	2
Sericytochromatia	0	0	1	0	0	0	5	5
FCPU426	0	0	2	0	0	0	7	2
Geobacillus	0	0	3	1	2	1	0	4
Jeotgalicoccus	1	0	5	4	1	0	0	0
Papillibacter	0	2	2	1	0	2	4	0
Eubacterium_nodatum_group	2	0	0	4	1	1	1	2
B55-F-B-G02	0	2	4	0	0	2	3	0
Dojkabacteria	0	0	7	0	0	0	3	1
Hyphomonas	1	0	1	1	0	1	2	5
Magnetospirillum	2	4	0	0	1	1	2	1
DSSF69	3	1	3	0	1	0	3	0
Succinivibrio	4	0	2	0	5	0	0	0
Thiobacillus	1	0	7	0	1	0	2	0
Alterococcus	1	1	0	0	0	0	2	7
Saccharopolyspora	4	0	1	2	0	0	1	2
Sphingobacterium	0	0	2	0	2	1	0	5
Solobacterium	1	0	2	1	4	1	0	1
Tyzzerella	0	0	0	7	2	1	0	0
SRB2	2	3	0	2	0	3	0	0
Alcanivorax	6	0	0	0	4	0	0	0
Aggregatibacter	1	0	2	4	1	1	0	1
Brooklawnia	0	0	5	0	0	2	2	0
Solirubrobacter	1	2	1	0	2	0	1	2
Armatimonas	1	3	1	1	1	0	1	1
Armatimonadales	0	0	0	9	0	0	0	0
Macellibacteroides	0	2	1	0	1	5	0	0
Thermoflexibacter	2	0	1	0	0	0	6	0
Solitalea	0	1	1	0	0	0	6	1
PHOS-HE36	3	1	0	1	3	1	0	0
ADurb.Bin120	0	1	2	0	0	2	4	0
Gleocapsa	3	5	0	0	0	1	0	0
Babeliaceae	0	0	3	2	0	0	2	2
Acholeplasma	1	1	1	0	0	6	0	0
Sinibacillus	4	0	0	0	5	0	0	0
Family_XIII_AD3011_group	0	0	0	7	1	0	0	1
Leptotrichia	3	0	2	2	1	0	0	1
Singulisphaera	0	0	0	0	0	0	9	0
FukuN57	0	0	1	1	0	1	4	2
Litorimicrobium	4	0	1	1	2	0	1	0
Simplicispira	0	1	3	1	2	1	1	0
Marinobacterium;s__bacterium_WHC3-3	2	0	2	2	2	1	0	0
Ellin517	0	0	1	0	0	0	7	1
Candidatus_Aquiluna	1	0	0	5	1	0	0	1
Amycolatopsis	1	0	1	2	2	1	0	1
Butyricimonas	0	0	1	6	0	1	0	0
Prevotellaceae_NK3B31_group	0	0	1	7	0	0	0	0
Parafilimonas	0	0	0	0	0	0	1	7
Longilinea	0	1	2	0	0	1	3	1
Catenibacterium	3	0	1	1	3	0	0	0
Weissella	1	0	0	1	2	1	2	1
Fonticella	1	0	1	1	0	2	1	2
Anaerocolumna	0	0	1	6	0	0	1	0
UCG-009	1	0	1	6	0	0	0	0
Anaerotruncus	1	0	0	6	0	0	0	1
Ruminococcaceae	0	0	1	4	1	2	0	0
D8A-2	0	1	4	0	0	0	3	0
Cetobacterium	0	0	1	4	2	0	0	1
Anaeromyxobacter	0	0	2	1	0	0	1	4
Rhodovarius	0	0	2	0	0	1	4	1
Stella	0	0	2	1	0	0	4	1
Candidatus_Nucleicultrix	0	0	2	0	0	1	3	2
HIMB11	0	0	0	5	0	2	1	0
S25-593	1	1	0	5	1	0	0	0
Methylotenera	1	3	1	0	1	1	0	1
Crenothrix	4	0	0	0	3	1	0	0
Rhodanobacter	1	0	1	2	1	3	0	0
EBM-39	0	1	1	0	3	2	1	0
Cephaloticoccus	0	0	0	0	0	0	7	1
ADurb.Bin118	0	0	5	0	0	0	3	0
Stenotrophobacter	0	0	1	1	0	1	1	3
Subgroup_10	0	0	3	0	0	0	2	2
Williamwhitmania	3	0	1	1	1	1	0	0
Cnuella	0	3	0	0	0	1	1	2
Flavitalea	1	0	1	0	0	0	1	4
AKYG1722	1	0	0	0	0	1	0	5
SHA-26	1	0	1	3	0	1	0	1
Vermiphilaceae	1	1	1	0	2	0	1	1
Syntrophobacter	2	0	0	0	5	0	0	0
Pasteuria	1	1	2	0	0	0	3	0
Lachnospiraceae_AC2044_group	2	0	2	0	2	0	1	0
Lachnospiraceae_NK3A20_group	0	0	3	1	0	1	2	0
Acetoanaerobium	2	0	1	0	2	2	0	0
Finegoldia	1	0	2	1	1	1	1	0
Acidaminococcus	4	0	0	3	0	0	0	0
Zavarzinella	0	5	0	0	0	0	0	2
SAR116_clade	0	0	0	7	0	0	0	0
Pseudoalteromonas	1	0	0	0	0	0	0	6
T34	3	0	0	0	4	0	0	0
RBG-16-49-21	0	0	4	0	1	0	2	0
Candidatus_Udaeobacter	0	0	1	2	0	0	0	4
FukuN18_freshwater_group	0	0	1	0	0	0	5	1
ADurb.Bin063-1	1	0	0	0	0	0	1	5
Subgroup_17	1	0	0	0	0	0	0	5
Blastococcus	1	0	1	0	0	2	1	1
Marmoricola	0	0	1	1	0	0	2	2
H1	1	2	1	1	0	1	0	0
Larkinella	1	3	0	0	1	0	1	0
Anaerolinea	1	1	0	1	1	0	1	1
SBR1031	1	0	0	1	0	0	2	2
Pleurocapsa_PCC-7328	1	0	0	1	1	0	0	3
Desulfatiglans	1	0	0	1	4	0	0	0
Desulfurivibrio	1	1	1	1	1	1	0	0
Endomicrobium	1	0	2	1	1	0	1	0
Lineage_IIa	0	1	1	0	0	0	3	1
Anaeroplasma	1	0	0	4	0	0	0	1
Holdemanella	1	0	1	2	2	0	0	0
Ileibacterium	1	0	0	3	0	0	1	1
Clostridium_sensu_stricto_6	1	2	0	0	0	0	0	3
Gallicola	2	0	1	0	1	1	1	0
Desulfitibacter	0	1	4	0	0	0	1	0
Blastopirellula	0	0	0	0	0	0	2	4
Skermanella	0	0	1	3	0	1	1	0
Candidatus_Paracaedibacter	1	0	1	0	0	0	3	1
Planktomarina	0	0	0	5	0	0	0	1
Clade_II	0	0	0	5	0	1	0	0
Methylobacillus	0	1	0	1	1	0	0	3
Luminiphilus	0	1	1	1	0	3	0	0
Azotobacter	1	2	0	0	0	3	0	0
Turneriella	0	0	0	0	0	1	3	2
Holophaga	0	0	0	1	0	0	0	4
Subgroup_25	0	0	3	1	1	0	0	0
Thermoanaerobaculum	0	0	3	1	0	1	0	0
Luteococcus	0	0	5	0	0	0	0	0
Propioniciclava	0	0	2	0	0	0	3	0
Prevotellaceae_Ga6A1_group	0	0	3	2	0	0	0	0
Sporocytophaga	1	1	1	0	0	0	1	1
OLB12	1	0	1	0	1	0	1	1
Cyanobium_PCC-6307	1	0	1	1	1	1	0	0
Lineage_Iib	1	1	0	0	1	0	0	2
Erysipelothrix	0	1	0	0	0	4	0	0
Aerosphaera	1	0	0	2	1	0	0	1
Facklamia	1	0	1	2	0	0	0	1
RsaHf231	1	0	2	1	0	1	0	0
Stomatobaculum	4	1	0	0	0	0	0	0
Acidaminobacter	0	0	0	1	0	0	1	3
Soehngenia	1	2	0	0	2	0	0	0
Anaerospora	0	1	0	0	0	1	0	3
BD2-11_terrestrial_group	0	0	0	5	0	0	0	0
Candidatus_Kaiserbacteria	0	0	0	0	0	0	5	0
PMMR1	1	0	1	1	0	1	0	1
Defluviicoccus	1	0	0	0	0	1	0	3
Camelimonas	0	0	0	0	1	1	2	1
KF-JG30-B3	0	0	0	0	0	0	0	5
Candidatus_Ovatusbacter	0	0	0	0	0	0	2	3
HdN1	3	0	1	0	0	0	0	1
Oleibacter	0	0	1	1	1	1	0	1
UBA10353_marine_group	0	0	1	4	0	0	0	0
Sva0485	2	0	0	0	3	0	0	0
WCHB1-41	0	0	0	0	0	0	0	5
Terrimicrobium	0	0	0	0	0	0	3	2
Subgroup_11	0	0	2	1	0	0	0	1
Brachybacterium	0	1	2	1	0	0	0	0
Ornithinimicrobium	1	0	1	1	1	0	0	0
Pseudoglutamicibacter	1	0	2	0	0	1	0	0
Coriobacteriaceae_UCG-002	1	0	0	0	1	0	0	2
F082	1	0	0	2	1	0	0	0
Arcticibacter	0	0	2	1	0	1	0	0
053A03-B-DI-P58	0	0	1	0	0	0	3	0
Campylobacter	0	0	1	1	0	0	0	2
Herpetosiphon	0	0	1	0	0	0	3	0
Gitt-GS-136	0	0	1	0	0	0	1	2
C0119	1	0	1	2	0	0	0	0
JG30-KF-AS9	0	0	1	2	0	0	0	1
Synechococcus_PCC-7902	1	0	0	0	0	1	0	2
Vampirovibrionales	0	1	0	1	0	0	0	2
Syntrophotalea	0	0	3	0	0	0	1	0
possible_genus_06	0	0	0	0	0	0	2	2
Brevibacillus	0	0	0	2	0	1	0	1
Izemoplasmataceae	0	0	2	0	0	0	2	0
Vagococcus	1	0	2	0	0	0	0	1
RF39	0	0	0	3	1	0	0	0
Clostridium_sensu_stricto_18	0	0	0	1	0	3	0	0
Anaerofustis	0	0	2	0	0	0	2	0
Acetobacterium	1	0	0	0	3	0	0	0
Acetatifactor	0	0	0	4	0	0	0	0
Desulfitobacterium	3	0	0	1	0	0	0	0
Candidatus_Dichloromethanomonas	0	0	3	0	0	0	1	0
Hypnocyclicus	2	0	0	0	0	0	1	1
Roseisolibacter	0	0	0	0	1	1	0	2
Longimicrobium	0	0	0	1	0	2	0	1
S0134_terrestrial_group	0	0	2	1	0	0	1	0
Corallococcus	1	0	0	0	2	1	0	0
UASB-TL25	0	0	0	0	0	0	0	4
Saccharimonadaceae	0	0	0	3	1	0	0	0
Tepidisphaera	0	0	0	1	0	0	0	3
Elioraea	1	1	0	0	0	1	0	1
AT-s3-44	0	0	2	0	0	0	1	1
Rhizomicrobium	0	1	1	1	1	0	0	0
AB1	1	0	1	0	0	0	1	1
Candidatus_Accumulibacter	0	0	2	0	2	0	0	0
Arsenophonus	2	0	0	0	2	0	0	0
Halothiobacillus	1	0	0	0	1	2	0	0
KF-JG30-C25	1	2	0	0	1	0	0	0
Chiayiivirga	1	0	0	2	0	0	0	1
Fretibacterium	0	0	0	0	0	4	0	0
DEV008	0	0	0	0	0	0	0	4
DEV007	0	3	0	0	0	0	0	1
Edaphobacter	0	0	3	0	0	0	0	0
Geothrix	0	1	1	0	0	0	1	0
Candidatus_Microthrix	1	0	0	0	2	0	0	0
Gardnerella	2	0	0	0	1	0	0	0
Nocardia	1	1	0	1	0	0	0	0
Sporichthyaceae	0	0	0	0	0	2	1	0
Ornithinicoccus	0	0	1	1	0	0	1	0
Actinomadura	1	0	0	0	1	0	1	0
Olsenella	0	0	1	1	0	0	0	1
Bacteroidetes_BD2-2	0	0	0	0	0	0	1	2
Chitinophaga	0	0	1	1	0	0	0	1
Aureispira	2	1	0	0	0	0	0	0
Fibrisoma	0	1	0	0	0	0	1	1
Persicitalea	0	0	1	0	0	0	2	0
BSV26	0	0	2	0	0	0	1	0
Sulfurovum	1	1	0	0	1	0	0	0
Anaerolineaceae_UCG-001	1	1	0	0	1	0	0	0
Flexilinea	0	0	0	0	0	3	0	0
AKIW781	0	0	1	2	0	0	0	0
Desmonostoc_PCC-7422	2	1	0	0	0	0	0	0
Fischerella_PCC-9339	2	1	0	0	0	0	0	0
Stanieria_PCC-7437	1	1	0	0	0	0	0	1
Synechococcus_CC9902	1	0	0	2	0	0	0	0
Candidatus_Obscuribacter	0	0	1	0	0	0	1	1
Thermus	1	0	0	1	0	0	0	1
Desulfobacca	0	0	0	0	0	1	1	1
Elusimicrobium	0	0	0	3	0	0	0	0
Alicyclobacillus	0	0	1	2	0	0	0	0
Gracilibacillus	0	0	0	1	0	0	0	2
Salipaludibacillus	2	0	0	1	0	0	0	0
Caldalkalibacillus	0	0	2	1	0	0	0	0
Catenisphaera	0	0	0	2	0	0	0	1
Holdemania	0	0	1	1	0	1	0	0
Izemoplasmatales	0	1	1	0	0	0	1	0
Carnobacterium	1	0	0	1	1	0	0	0
Jeotgalibaca	0	1	0	1	0	1	0	0
Leuconostoc	1	0	0	0	1	0	0	1
Thermicanus	0	0	0	2	0	1	0	0
Gracilibacter	0	1	0	0	1	1	0	0
Pseudobacteroides	0	0	1	1	0	1	0	0
ASF356	0	0	0	3	0	0	0	0
Frisingicoccus	1	1	1	0	0	0	0	0
Oribacterium	1	0	1	0	0	1	0	0
Fenollaria	0	0	2	0	0	1	0	0
Guggenheimella	1	0	0	0	0	2	0	0
Peptoniphilus	0	0	0	2	0	1	0	0
Thermincola	1	0	0	1	1	0	0	0
Veillonellaceae_UCG-001	0	0	1	1	0	1	0	0
Thermosinus	0	2	0	0	1	0	0	0
YC-ZSS-LKJ63	0	0	2	0	0	0	1	0
Latescibacterota	1	0	0	0	0	1	0	1
Rokubacteriales	0	0	1	0	0	0	0	2
4-29-1	0	0	1	0	0	1	0	1
Acetobacter	0	0	1	0	1	0	0	1
Rhodopila	0	0	0	0	0	0	2	1
Amphiplicatus	1	0	0	0	0	0	1	1
Rhodovulum	0	0	2	1	0	0	0	0
Sulfitobacter	0	0	2	1	0	0	0	0
Idiomarina	0	0	0	1	0	0	0	2
Aquaspirillum	1	0	0	0	2	0	0	0
Polaromonas	0	0	1	0	0	0	2	0
Tepidimonas	0	1	1	0	0	1	0	0
Thiomonas	0	1	0	1	1	0	0	0
C1-B045	0	0	2	0	0	0	1	0
EPR3968-O8a-Bc78	0	0	2	0	0	1	0	0
Litoricola	0	0	0	3	0	0	0	0
BIyi10	2	0	0	0	1	0	0	0
Pseudohongiella	0	0	0	3	0	0	0	0
Psychrobacter	1	0	0	0	2	0	0	0
SAR86_clade	0	0	0	3	0	0	0	0
Aminiphilus	1	0	0	0	1	1	0	0
Candidatus_Omnitrophus	0	3	0	0	0	0	0	0
Roseimicrobium	0	0	0	0	0	0	0	3
DS-100	0	0	0	0	0	0	0	2
Subgroup_22	0	0	1	0	0	1	0	0
Klenkia	1	0	0	0	0	0	1	0
Pseudarthrobacter	0	0	0	2	0	0	0	0
Virgisporangium	0	0	0	1	0	0	1	0
Tessaracoccus	1	0	0	0	0	0	0	1
Saccharomonospora	0	1	0	0	0	0	0	1
DNF00809	0	0	0	1	0	0	0	1
Enterorhabdus	0	0	1	0	1	0	0	0
RBG-16-55-12	0	0	1	0	0	0	1	0
Porphyromonas	0	0	1	0	0	0	0	1
Rs-E47_termite_group	0	0	1	1	0	0	0	0
SB-5	0	0	0	0	0	0	1	1
Candidatus_Paenicardinium	0	0	0	1	0	1	0	0
Fibrella	0	1	0	0	0	0	0	1
NS5_marine_group	0	0	0	2	0	0	0	0
SM1A07	0	0	1	0	0	0	1	0
Silvanigrella	0	0	1	0	0	0	1	0
UTCFX1	0	0	1	0	0	1	0	0
MSB-5E12	0	0	1	0	0	0	1	0
FCPS473	0	0	1	1	0	0	0	0
W27	0	1	0	0	0	1	0	0
Chroococcidiopsis_PCC-6712	0	1	0	0	0	0	0	1
Trichlorobacter	0	1	0	0	1	0	0	0
Oceanobacillus	0	0	0	1	0	0	0	1
Jeotgalibacillus	0	0	0	1	0	1	0	0
Abiotrophia	0	0	0	2	0	0	0	0
Aerococcus	1	0	0	0	0	0	0	1
Cohnella	0	0	2	0	0	0	0	0
Thermobacillus	0	0	1	1	0	0	0	0
Novibacillus	0	2	0	0	0	0	0	0
Thermoactinomycetaceae	0	1	0	0	0	1	0	0
Defluviitaleaceae_UCG-011	0	0	0	2	0	0	0	0
Eubacterium_xylanophilum_group	0	0	0	1	1	0	0	0
Marvinbryantia	1	0	1	0	0	0	0	0
Hydrogenoanaerobacterium	1	0	0	1	0	0	0	0
Proteiniborus	0	0	0	0	0	2	0	0
Dethiobacter	0	0	0	0	0	2	0	0
Caldanaerobacter	0	0	0	1	0	1	0	0
AKAU4049	1	0	0	0	1	0	0	0
Sh765B-TzT-35	0	0	1	0	1	0	0	0
WX65	0	0	0	0	0	0	0	2
Candidatus_Daviesbacteria	0	0	2	0	0	0	0	0
CPla-3_termite_group	0	0	0	0	0	0	2	0
Gemmataceae	0	0	0	0	0	0	1	1
Elstera	0	0	0	0	0	0	1	1
PS1_clade	0	2	0	0	0	0	0	0
EF100-94H03	0	0	0	0	0	0	0	2
Constrictibacter	0	0	1	0	0	0	1	0
Acidithiobacillus	1	0	0	0	1	0	0	0
Tolumonas	1	0	0	0	1	0	0	0
A21b	0	0	0	0	0	1	1	0
Derxia	1	0	0	1	0	0	0	0
Chitinivorax	1	0	0	0	0	0	1	0
Comamonadaceae	0	0	0	0	0	0	2	0
Sideroxydans	0	0	2	0	0	0	0	0
Tepidiphilus	0	0	0	2	0	0	0	0
Uruburuella	0	0	0	0	0	0	0	2
GOUTA6	0	0	1	0	0	0	0	1
CHAB-XI-27	0	0	0	0	0	0	2	0
KI89A_clade	0	0	0	0	0	0	0	2
CI75cm.2.12	0	0	2	0	0	0	0	0
Motiliproteus	0	0	0	2	0	0	0	0
Oleiphilus	0	0	0	0	0	0	0	2
OM182_clade	0	0	0	2	0	0	0	0
Luteibacter	1	0	0	0	1	0	0	0
Verrucomicrobiales	0	0	0	0	0	0	0	2
FFCH16263	1	0	0	0	0	0	0	0
Longispora	0	1	0	0	0	0	0	0
Microlunatus	0	1	0	0	0	0	0	0
Gordonibacter	0	0	0	0	1	0	0	0
p-2534-18B5_gut_group	1	0	0	0	0	0	0	0
Membranicola	0	0	0	0	0	0	1	0
Pontibacter	0	0	1	0	0	0	0	0
Bergeyella	1	0	0	0	0	0	0	0
CWT_CU03-E12	0	1	0	0	0	0	0	0
Candidatus_Caldatribacterium	0	0	1	0	0	0	0	0
HSB_OF53-F07	0	0	0	0	0	0	0	1
Geovibrio	0	1	0	0	0	0	0	0
UBA12409	0	0	0	0	0	0	0	1
Desulfovirga	1	0	0	0	0	0	0	0
Entotheonellaceae	0	1	0	0	0	0	0	0
Cerasibacillus	0	0	1	0	0	0	0	0
Marinococcus	1	0	0	0	0	0	0	0
Candidatus_Stoquefichus	0	0	0	1	0	0	0	0
Haloplasma	0	0	0	0	0	0	0	1
Johnsonella	1	0	0	0	0	0	0	0
Lachnospiraceae_UCG-006	0	0	0	1	0	0	0	0
Fournierella	0	0	0	1	0	0	0	0
Peptostreptococcaceae	0	0	1	0	0	0	0	0
Desulfosporosinus	0	0	0	0	1	0	0	0
Hydrogenispora	0	0	0	1	0	0	0	0
Tepidanaerobacter	0	0	1	0	0	0	0	0
MidBa8	0	0	1	0	0	0	0	0
Candidatus_Peribacteria	0	0	0	0	0	0	0	1
AKYG587	0	0	0	0	0	0	0	1
Acidisoma	0	1	0	0	0	0	0	0
Thalassobaculum	0	1	0	0	0	0	0	0
Chitiniphilus	0	0	0	0	0	0	0	1
Hydrogenophilus	1	0	0	0	0	0	0	0
Dokdonella	0	0	0	0	0	0	1	0
MVP-15	0	0	1	0	0	0	0	0
Mesotoga	0	0	1	0	0	0	0	0
Candidatus_Protochlamydia	0	0	1	0	0	0	0	0
Verruc-01	0	0	0	0	0	0	0	1
Verrucomicrobium	0	0	0	0	0	1	0	0

## Sheet: Species
Table S3. Numbers of bacterial sequences assigned to each taxonomic rank (phylum, class, order, family, genus, species) across all sample categories.
Species	Mean sequence count of each taxonomic rank per sample group
	AeyL	AlbL	AeyF	AeyM	AlbF	AlbM	AeyW	AlbW
Aeromonas_hydrophila	29	145	29276	782	46348	881	319	824
Lysinibacillus_sphaericus	37503	844	17	342	495	3	41	2
Spironema_culicis	4423	21307	47	47	108	12368	23	66
Escherichia_coli	1299	9	12105	16632	1450	948	149	369
Rhodocyclaceae_bacterium	10972	4074	9	257	6	445	37	544
Nitrospira_defluvii	7	24	356	5	9	28	8753	169
Flectobacillus_sp.	2354	3953	0	14	23	39	0	24
Coprobacillus_cateniformis	196	0	2157	3241	145	185	39	111
Comamonas_testosteroni	14	3	17	31	2	4	197	5321
Clostridioides_difficile	355	1	1798	2087	408	436	83	244
Coetzeea_brasiliensis	4681	279	1	119	0	0	1	46
Klebsiella_pneumoniae	156	3	1386	1870	178	130	22	53
Acinetobacter_junii	12	6	7	281	5	10	10	2977
Bifidobacterium_catenulatum	11	1	120	2883	86	53	1	71
Castellaniella_defragrans	0	11	9	3113	1	17	3	0
Morganella_morganii	123	1	1045	1395	148	123	16	37
Akkermansia_muciniphila	54	0	1011	1447	30	45	15	50
Megasphaera_elsdenii	1	0	0	2350	1	0	0	0
Oryza_longistaminata	1	0	216	0	0	23	2014	58
Bosea_sp.	75	206	406	138	228	357	464	358
Bradyrhizobium_sp.	22	9	392	11	12	72	1267	266
Streptococcus_salivarius	25	3	77	1791	46	41	1	37
Aquabacterium_citratiphilum	1145	189	2	28	13	2	22	29
Bacteroides_vulgatus	9	0	27	1335	34	15	1	8
Sphingomonas_piscinae	14	4	167	1	6	39	873	73
Faecalibacterium_prausnitzii	58	1	92	773	119	49	3	44
Rhodobacter_sphaeroides	44	104	29	29	16	51	36	567
Clostridium_tyrobutyricum	6	3	0	685	1	0	2	3
Porphyromonadaceae_bacterium	75	204	2	48	2	360	0	0
Stenotrophomonas_acidaminiphila	0	2	1	602	0	6	0	0
Tetradesmus_obliquus	109	159	17	2	11	4	189	97
Ancylobacter_sp.	1	2	170	72	71	196	10	25
Geobacter_anodireducens	121	102	36	13	131	119	5	0
Bifidobacterium_longum	2	1	23	449	12	15	0	13
Acinetobacter_baumannii	21	7	52	43	47	23	5	296
Mychonastes_jurisii	17	370	0	5	0	11	2	86
Acidobacteria_bacterium	3	1	71	2	1	9	342	60
Brevundimonas_vesicularis	99	15	44	9	36	21	129	115
Pseudomonas_formosensis	260	1	6	176	2	3	4	1
Bacteroides_sp.	219	155	2	2	0	5	13	2
Pseudomonas_otitidis	29	58	42	19	91	41	32	84
anaerobic_digester	53	101	1	52	0	159	0	0
Devosia_riboflavina	3	5	104	45	52	126	10	14
Eubacterium_rectale	26	1	33	193	60	22	1	19
Providencia_sp.	11	0	87	231	9	8	2	4
Anaerostipes_hadrus	0	0	47	226	21	19	0	31
Oscillibacter_ruminantium	0	0	0	312	0	0	0	0
Deinococcus_misasensis	8	12	0	9	0	2	7	265
Mycobacterium_neoaurum	147	59	11	9	15	6	27	24
Bacteroides_stercoris	1	0	3	281	4	1	0	1
Romboutsia_ilealis	21	5	40	132	47	24	6	13
Rahnella_aquatilis	79	12	165	7	3	2	3	5
Ralstonia_pickettii	18	12	54	39	22	44	59	27
Sphingomonas_sp.	4	7	49	11	13	37	50	99
Parabacteroides_distasonis	3	1	4	248	4	4	2	2
bacterium_enrichment	1	0	0	259	1	0	0	0
Methylorubrum_extorquens	3	2	35	6	5	10	155	31
Sphingomonas_faeni	2	1	79	25	39	73	13	12
Blautia_obeum	6	1	17	181	10	12	0	12
Variovorax_sp.	11	33	33	40	17	20	34	43
Nitrosomonas_sp.	0	1	68	0	1	4	130	25
Bacillus_indicus	11	33	1	10	1	7	6	154
Planoglabratella_opercularis	13	143	0	2	0	5	3	54
Coxiella_endosymbiont	0	0	0	212	0	0	0	0
beta_proteobacterium	6	11	0	16	0	4	9	165
Haemophilus_parainfluenzae	7	1	19	130	16	9	1	19
Dechloromonas_sp.	35	40	1	6	1	6	6	89
Desulfovibrio_magneticus	3	0	0	10	1	3	13	153
Bacteroides_acidifaciens	1	1	3	173	1	3	0	0
Lacibacter_cauensis	9	97	1	1	1	5	6	61
Brevundimonas_kwangchunensis	4	1	24	4	3	13	105	20
Cutibacterium_acnes	36	0	15	57	42	5	3	6
Asticcacaulis_sp.	10	1	38	22	23	56	2	11
Bacteroides_fragilis	0	1	7	147	2	3	0	2
Sphingobium_yanoikuyae	4	3	21	5	3	13	72	40
Gemmata_sp.	2	0	4	1	1	0	82	65
Aquitalea_magnusonii	115	17	0	7	0	0	1	9
Pseudomonas_peli	23	3	1	4	9	2	2	102
Bacteroides_uniformis	3	0	8	122	2	1	0	1
Lactobacillus_salivarius	76	18	2	8	3	26	2	2
Roseomonas_sp.	17	64	1	1	21	2	8	20
Lacibacterium_aquatile	0	0	46	1	0	4	71	11
Aquihabitans_daechungensis	15	21	2	5	4	5	15	63
Clostridium_kluyveri	0	0	0	125	0	0	0	0
Erythrobacter_sp.	1	1	32	9	8	28	32	13
Pseudoxanthomonas_mexicana	6	7	22	10	10	20	24	18
Bacteroides_caccae	0	0	3	107	2	3	0	1
Rhodopseudomonas_palustris	4	2	16	3	6	8	33	44
Proteus_vulgaris	6	0	34	59	6	5	2	2
Moraxella_osloensis	13	3	16	64	10	2	2	1
Candidatus_Planktophila	1	0	25	5	2	2	63	5
Phytoplasma_sp.	10	1	18	2	0	6	55	10
Bacteroides_plebeius	4	0	8	68	6	4	0	2
Bacillus_aryabhattai	29	12	12	6	6	13	2	10
Anaerostipes_caccae	9	0	21	34	5	15	1	5
bacterium_enrichment	1	1	12	0	0	3	62	11
Bacteroides_coprocola	1	1	9	66	4	5	0	3
Parabacteroides_sp.	1	0	0	88	0	0	0	0
Bacteroides_ovatus	1	0	2	73	5	3	0	2
Pseudoflavonifractor_sp.	6	7	0	59	0	14	0	0
Paracraurococcus_sp.	14	6	5	3	4	2	22	25
Chroococcidiopsis_sp.	38	25	1	0	6	2	1	7
Candidatus_Kapabacteria	0	0	12	0	0	1	61	3
Mycoplasma_moatsii	0	0	0	0	0	0	0	76
Candidatus_Finniella	8	51	0	0	0	12	1	4
Corynebacterium_tuberculostearicum	7	2	13	23	4	8	1	17
Amphibacillus_xylanus	10	19	0	5	0	41	0	0
Clostridiaceae_bacterium	15	3	20	3	1	3	17	13
Veillonella_atypica	1	0	8	51	2	4	1	8
Hypsibius_dujardini	0	0	16	0	0	3	49	6
Streptomyces_albidoflavus	2	0	19	3	2	4	35	7
Hyphomicrobium_denitrificans	6	4	9	6	1	2	15	29
Bacillus_thuringiensis	10	2	7	1	1	4	34	11
Lentimicrobium_saccharophilum	16	13	7	2	8	21	0	0
Clostridium_sp.	0	0	0	66	0	0	0	0
Desulfovibrio_putealis	1	2	0	7	0	2	4	49
Clostridium_sp.	4	0	5	34	11	4	1	3
Oscillatoriales_cyanobacterium	5	44	0	0	0	4	1	6
Clostridium_perfringens	1	3	3	47	2	1	1	2
Prevotella_copri	12	0	14	19	10	2	1	1
Azospirillum_sp.	0	3	11	3	0	3	25	14
Fictibacillus_phosphorivorans	1	4	1	7	1	4	4	36
Blautia_hansenii	3	0	20	23	3	7	0	2
Burkholderiales_bacterium	0	0	1	52	1	0	0	0
Clostridium_acetobutylicum	9	15	0	4	1	5	3	15
Alistipes_putredinis	5	0	8	33	2	2	0	1
Clostridium_sp.	17	2	1	6	1	1	6	17
Limnobacter_sp.	3	1	5	21	3	5	11	2
Agromyces_mediolanus	1	1	11	1	1	6	24	5
Micrococcus_luteus	8	6	12	5	9	7	1	2
Emticicia_sp.	6	18	0	1	3	1	2	18
Gaiella_sp.	3	2	8	0	4	3	24	4
Peptoclostridium_phage	2	0	20	18	3	2	2	1
Corynebacterium_ureicelerivorans	5	1	9	19	6	3	2	2
Solirubrobacterales_bacterium	3	0	11	0	0	3	25	5
Flavobacterium_indicum	25	4	0	1	0	1	14	1
Phascolarctobacterium_faecium	4	0	2	32	2	2	0	4
Aurantimonas_sp.	5	0	12	3	4	10	5	7
Opitutus_sp.	0	1	1	1	0	1	5	37
Hassallia_byssoidea	1	4	4	0	0	1	17	15
Lactobacillus_johnsonii	8	1	5	9	8	9	0	2
Aquitalea_sp.	35	5	0	2	0	0	0	0
Novispirillum_itersonii	8	23	0	0	0	8	0	1
Atopobium;s__bacterium	1	1	17	0	0	3	16	1
Microvirga_sp.	1	4	6	2	0	3	7	16
Ralstonia_insidiosa	10	4	6	5	2	9	1	2
Burkholderiales_bacterium	5	1	1	0	0	0	19	13
Chitinophaga_sp.	2	1	0	1	1	1	12	19
Pedobacter_composti	2	2	1	0	0	1	23	8
Legionella_sp.	2	1	4	0	0	2	8	20
Acinetobacter_soli	9	2	1	3	3	1	1	17
Parasegetibacter_luojiensis	1	3	9	3	5	10	1	4
delta_proteobacterium	0	0	4	0	0	0	17	15
Flavobacterium_sasangense	2	0	0	0	0	0	1	32
Lactobacillus_murinus	2	1	5	20	3	3	0	1
alpha_proteobacterium	1	4	0	3	0	2	3	21
Leeia_oryzae	26	3	0	1	0	0	1	3
Gracilibacteria_bacterium	0	1	0	1	0	0	1	30
Neisseria_perflava	18	0	1	1	7	0	0	6
Aeromicrobium_sp.	2	2	5	1	3	3	14	2
Parabacteroides_merdae	1	0	2	25	2	1	0	0
Trachydiscus_minutus	5	23	0	0	0	3	0	0
Zavarzinia_compransoris	0	0	6	1	0	0	18	6
Odoribacter_sp.	0	0	0	29	0	0	0	0
Aphanocapsa_muscicola	3	9	0	1	0	1	3	12
iron-reducing_bacterium	0	0	1	0	0	0	26	1
Alistipes_onderdonkii	10	4	1	9	1	1	0	1
Flavobacterium_sp.	0	1	11	2	5	7	0	1
Clostridium_scindens	1	0	1	19	3	1	1	1
Sphingomonas_koreensis	0	0	7	2	5	9	3	1
Burkholderia_cenocepacia	6	2	5	5	2	5	1	1
Lactobacillus_mucosae	15	4	2	2	1	1	0	1
Dialister_sp.	12	0	2	1	10	0	0	1
Lactobacillus_reuteri	3	0	4	9	7	1	0	1
Streptococcus_anginosus	9	2	0	5	1	6	1	1
Chitinibacter_tainanensis	5	5	0	1	0	5	1	8
beta_proteobacterium	0	0	1	1	0	0	0	23
Schaalia_odontolytica	0	0	3	14	2	2	1	2
Bacillus_gibsonii	2	16	0	0	3	1	0	2
Prosthecomicrobium_hirschii	1	0	1	1	0	1	10	10
bacterium_RS25G	1	0	2	0	0	0	20	1
bacterium_336/3	3	17	0	0	1	0	1	1
Cyanothece_aeruginosa	6	11	0	1	1	1	0	3
Brochothrix_thermosphacta	0	0	1	22	0	0	0	0
Aureimonas_sp.	1	2	7	1	3	7	1	1
Cellvibrio_sp.	2	5	1	2	0	2	4	7
Bacteroidetes_bacterium	0	0	3	0	0	1	17	1
Anaplasma_marginale	0	0	0	22	0	0	0	0
Lysobacter_sp.	3	0	2	2	1	1	7	6
Coelastrella_sp.	3	15	0	0	0	2	1	0
Ruminococcus_bicirculans	6	0	1	4	7	2	0	1
groundwater_biofilm	4	12	0	1	0	1	1	2
Chromobacterium_rhizoryzae	13	4	0	0	3	0	0	1
Tenericutes_bacterium	0	7	0	0	0	13	0	0
Clostridiales_bacterium	0	8	0	1	0	11	0	0
Dialister_invisus	2	0	3	10	3	1	0	1
Alteromonas_mediterranea	1	0	7	8	1	2	0	1
Paraburkholderia_caledonica	2	1	8	4	1	1	2	1
Acinetobacter_schindleri	1	1	1	7	5	2	0	3
Bdellovibrio_bacteriovorus	2	0	0	1	0	1	2	13
Clostridium_carboxidivorans	5	1	0	3	8	0	1	1
Syntrophomonas_wolfei	0	1	13	0	0	1	4	0
Arachis_hypogaea	1	0	4	2	1	6	1	4
Chitinimonas_taiwanensis	3	11	0	0	0	4	1	0
Pseudomonas_alkylphenolica	6	0	2	5	1	1	2	2
Corynebacterium_stationis	0	0	6	4	2	4	0	2
Desulfobulbus_oligotrophicus	0	0	11	1	0	0	6	0
Streptococcus_henryi	2	4	3	0	0	7	2	0
Clostridium_sp.	0	0	0	18	0	0	0	0
Rudanella_lutea	1	5	0	0	0	1	0	10
Spirosoma_panaciterrae	8	1	0	0	0	1	4	3
Clostridium_tunisiense	2	5	0	1	4	2	1	2
Fusobacterium_periodonticum	2	1	2	2	2	3	1	4
Acinetobacter_ursingii	9	1	0	0	5	1	1	0
Actinomyces_minihominis	1	1	8	0	0	2	4	0
Bacteroides_massiliensis	0	0	3	10	2	1	0	0
Bacillus_sp.	3	3	0	4	0	6	0	0
Candidatus_Halomonas	1	2	0	1	0	0	3	9
bacterium_enrichment	5	2	1	2	3	3	0	0
hydrothermal_vent	2	0	0	1	0	1	4	8
Rothia_mucilaginosa	1	0	3	5	2	1	0	3
Alistipes_shahii	5	0	0	5	3	1	0	1
Bdellovibrio_sp.	0	3	7	1	1	1	0	2
Clostridiales_bacterium	2	2	4	0	2	1	4	0
Clostridiales_bacterium	0	0	1	12	1	1	0	0
Candidatus_Captivus	0	0	6	0	0	0	7	2
Legionella_geestiana	1	1	1	1	0	1	2	8
Legionella_lytica	0	0	8	2	2	3	0	0
Bifidobacterium_thermophilum	4	2	0	2	3	2	1	0
Neochloris_aquatica	1	1	0	0	0	0	3	9
Anoxybacillus_tepidamans	5	6	0	0	2	1	0	0
Clostridium_ultunense	2	3	0	1	0	8	0	0
Nitrosomonas_oligotropha	0	0	3	0	0	1	9	1
Actinomyces_oris	0	0	1	8	1	1	0	2
Candidatus_Nanopelagicus	0	0	4	0	0	0	9	0
Nesterenkonia_sp.	6	0	1	2	4	0	0	0
Rothia_sp.	1	0	1	1	0	2	0	8
Helicobacter_typhlonius	0	0	4	9	0	0	0	0
Bacillus_coagulans	2	0	3	6	1	0	0	1
Firmicutes_bacterium	2	0	1	6	2	1	0	1
Lactococcus_lactis	1	1	2	2	1	2	0	4
Pygmaiobacter_massiliensis	0	0	0	13	0	0	0	0
Parcubacteria_group	0	0	1	0	0	0	12	0
Vibrio_owensii	1	1	2	3	1	4	0	1
Atopobium_vaginae	5	0	0	0	7	0	0	0
Proteiniphilum_saccharofermentans	2	4	0	0	1	5	0	0
Leptolyngbya_sp.	1	4	0	1	0	0	0	6
Eubacterium_ramulus	0	0	0	11	1	0	0	0
Coprococcus_eutactus	3	0	0	1	6	2	0	0
Ruminococcaceae_bacterium	0	0	0	12	0	0	0	0
Eubacterium_siraeum	2	0	1	6	2	1	0	0
Ideonella_paludis	8	1	0	0	3	0	0	0
Bifidobacterium_pseudolongum	2	0	1	4	2	0	0	2
Corynebacterium_imitans	1	0	1	9	0	0	0	0
Prevotella_stercorea	2	0	1	5	1	0	0	2
Rikenella_microfusus	0	0	0	11	0	0	0	0
Hypsibius_dujardini	0	0	1	0	0	0	9	1
Lactobacillus_aviarius	4	0	1	0	5	0	0	1
Lactobacillus_iners	5	0	0	2	3	0	1	0
Planctomyces_sp.	0	1	0	0	0	0	6	4
Chitinilyticum_aquatile	1	2	0	2	0	0	0	6
Neisseriaceae_bacterium	1	0	0	0	0	0	2	8
Thiopseudomonas_denitrificans	0	0	7	0	0	1	3	0
Rhodococcus_corynebacterioides	2	3	1	1	1	0	1	1
Saccharopolyspora_sp.	4	0	1	2	0	0	1	2
Anoxybacillus_flavithermus	3	1	1	2	1	1	0	1
Solobacterium_moorei	1	0	2	1	4	1	0	1
Ruminococcus_callidus	0	0	1	5	1	1	1	1
TM7_phylum	0	0	3	6	0	0	0	1
Acetobacteraceae_bacterium	0	1	3	1	0	4	1	0
Alcanivorax_dieselolei	6	0	0	0	4	0	0	0
Haloferula_sp.	1	0	0	1	0	0	1	7
Nocardioides_zeae	0	0	0	2	0	1	5	1
Armatimonadetes_bacterium	0	2	0	1	0	1	2	3
Bacteroides_salyersiae	0	0	1	8	0	0	0	0
Prevotella_sp.	3	0	2	2	1	0	0	1
Flavobacterium_lacunae	7	0	0	0	1	0	1	0
Chryseobacterium_indologenes	3	1	1	1	1	0	1	1
Pelotomaculum_sp.	3	1	1	0	3	0	1	0
Sinibacillus_soli	4	0	0	0	5	0	0	0
Diplazium_pycnocarpon	8	0	0	0	0	0	0	1
Chitinilyticum_litopenaei	0	0	0	0	0	0	0	9
bacterium_WHC3-3	2	0	2	2	2	1	0	0
Cutibacterium_granulosum	2	0	1	1	2	1	1	0
Actinomycetospora_sp.	1	1	1	1	0	1	1	2
Prevotella_melaninogenica	4	0	2	1	1	0	0	0
Dyadobacter_sp.	0	0	1	2	0	2	2	1
Mucilaginibacter_sp.	2	1	1	1	1	2	0	0
Bdellovibrio_exovorus	1	3	0	0	1	0	2	1
Lactobacillus_fermentum	2	1	2	1	1	1	0	0
Lactobacillus_plantarum	0	1	4	0	0	0	0	3
Weissella_cibaria	1	0	0	1	2	1	2	1
Clostridium_sp.	0	0	1	6	0	0	1	0
Clostridiaceae_bacterium	0	0	0	8	0	0	0	0
anaerobic_digester	2	1	0	1	0	3	1	0
Rhodovarius_sp.	0	0	2	0	0	1	4	1
alpha_proteobacterium	0	0	3	2	1	2	0	0
Caballeronia_zhejiangensis	0	0	5	1	0	1	0	1
Acinetobacter_marinus	0	0	6	0	0	1	1	0
Verrucomicrobia_bacterium	0	0	5	0	0	0	3	0
bacterium_YC-LK-LKJ4	0	0	0	0	0	0	0	7
bacterium_YC-ZSS-LKJ173	1	3	1	0	0	1	0	1
Corynebacterium_propinquum	1	0	1	1	2	1	0	1
Rubrobacter_radiotolerans	3	0	0	1	3	0	0	0
Bacteroides_cellulosilyticus	0	0	1	6	0	0	0	0
Parabacteroides_gordonii	1	0	1	3	1	1	0	0
Terrimonas_sp.	3	0	0	0	1	0	1	2
Flavobacterium_caeni	0	0	2	1	1	2	0	1
bacterium_Ellin6519	0	0	2	2	0	0	0	3
Eubacterium_sulci	1	0	0	2	0	1	1	2
Asticcacaulis_endophyticus	0	0	4	1	1	1	0	0
Acinetobacter_indicus	1	0	1	1	1	1	1	1
Nocardioides_perillae	0	2	1	1	0	0	1	1
Sediminibacterium_sp.	0	0	1	2	1	0	0	2
Brevefilum_fermentans	0	1	1	0	0	2	2	0
environmental_clone	0	0	0	6	0	0	0	0
Bacillus_thermocloacae	2	0	0	1	3	0	0	0
Ileibacterium_valens	1	0	0	3	0	0	1	1
Lactococcus_piscium	0	0	1	1	0	2	1	1
Streptococcus_mutans	4	0	1	1	0	0	0	0
Clostridium_cellulovorans	1	2	0	0	0	0	0	3
Lachnospiraceae_bacterium	1	0	0	4	0	0	0	1
Clostridiaceae_bacterium	0	0	0	3	1	1	0	1
anaerobic_digester	0	0	2	1	0	2	1	0
Candidatus_Intestinusbacter	0	0	2	0	0	1	2	1
Azospirillum_sp.	0	0	0	6	0	0	0	0
Sinobacteraceae_bacterium	0	0	1	0	0	1	3	1
Rhodanobacter_sp.	1	0	1	1	1	2	0	0
Turneriella_parva	0	0	0	0	0	1	3	2
Treponema_zuelzerae	0	0	0	1	0	0	0	5
Corynebacterium_lipophiloflavum	1	0	2	2	0	0	0	0
Corynebacterium_matruchotii	1	0	1	1	0	1	0	1
Taibaiella_sp.	0	0	2	1	1	1	0	0
Bdellovibrio_sp.	0	3	0	0	1	0	0	1
Phalacroma_mitra	0	0	0	5	0	0	0	0
Cyanobacteria/Melainabacteria_group	0	0	1	0	0	0	3	1
Facklamia_tabacinasalis	1	0	1	2	0	0	0	1
Clostridium_senegalense	1	0	0	2	0	1	0	1
Clostridium_sp.	0	0	0	1	1	0	0	3
Anaerotruncus_colihominis	0	0	0	5	0	0	0	0
Clostridium_leptum	0	1	1	2	1	0	0	0
Pirellula_sp.	1	2	0	0	0	0	1	1
hydrothermal_vent	0	0	0	5	0	0	0	0
Hankyongella_aquatica	3	1	0	0	1	0	0	0
Pseudaeromonas_sharmana	0	2	0	1	0	0	1	1
Derxia_sp.	0	0	4	0	0	0	1	0
gamma_proteobacterium	3	0	1	0	0	0	0	1
Persicaria_minor	1	3	0	0	1	0	0	0
Brachybacterium_sp.	0	1	2	1	0	0	0	0
Pseudoglutamicibacter_cumminsii	1	0	2	0	0	1	0	0
Bacteroides_coprophilus	1	0	0	1	2	0	0	0
Petrimonas_mucosa	0	2	0	0	0	2	0	0
Alistipes_sp.	1	0	0	2	1	0	0	0
Siphonobacter_aquaeclarae	0	0	0	0	0	0	4	0
Nubsella_sp.	0	0	2	1	0	1	0	0
Campylobacter_concisus	0	0	1	1	0	0	0	2
Herpetosiphon_aurantiacus	0	0	1	0	0	0	3	0
Dryopteris_fragrans	2	1	0	0	0	0	0	1
Nannochloropsis_gaditana	2	1	0	0	0	0	1	0
Gloeocapsa_sp.	1	3	0	0	0	0	0	0
Desulfovibrio_aminophilus	0	1	1	0	1	1	0	0
Pelobacter_acetylenicus	0	0	3	0	0	0	1	0
Parageobacillus_toebii	0	0	0	0	0	0	0	4
Lactobacillus_dextrinicus	0	0	1	2	0	0	0	1
Lactococcus_garvieae	2	0	0	1	0	0	0	1
Vagococcus_teuberi	1	0	2	0	0	0	0	1
Clostridiales_bacterium	1	1	0	0	1	1	0	0
Clostridium_botulinum	0	0	0	1	0	3	0	0
Acetobacterium_sp.	1	0	0	0	3	0	0	0
Oscillibacter_sp.	0	0	0	3	0	0	0	1
Gemmatimonadetes_bacterium	0	0	1	0	0	0	3	0
Gemmatimonas_aurantiaca	0	0	1	0	0	0	3	0
Gemmatimonas_sp.	1	0	0	0	1	0	1	1
Corallococcus_coralloides	1	0	0	0	2	1	0	0
Myxococcales_bacterium	0	0	0	0	0	0	1	3
planctomycete_str.	0	0	1	1	1	0	0	1
Planctopirus_limnophila	0	0	0	0	0	0	3	1
Elioraea_tepidiphila	1	1	0	0	0	1	0	1
Idiomarina_sp.	0	1	0	0	0	1	0	2
Parasutterella_secunda	2	0	0	0	2	0	0	0
Haemophilus_sp.	0	0	0	0	0	0	0	4
Pseudomonas_psychrotolerans	1	0	2	0	0	0	0	1
Coptotermes_gestroi	0	0	3	0	0	0	1	0
Synergistales_bacterium	0	0	0	0	0	4	0	0
Verrucomicrobia_bacterium	0	0	0	0	0	0	0	4
Actinomyces_gerencseriae	0	0	0	2	1	0	0	0
Actinomyces_graevenitzii	0	0	1	1	0	0	0	1
Gardnerella_vaginalis	2	0	0	0	1	0	0	0
Nocardia_brasiliensis	1	1	0	1	0	0	0	0
Rhodococcus_fascians	2	1	0	0	0	0	0	0
Dysgonomonas_mossii	1	1	0	0	0	1	0	0
mouse_gut	0	0	0	2	1	0	0	0
Alistipes_obesi	0	0	0	2	0	0	0	1
Chitinophagaceae_bacterium	0	0	1	0	2	0	0	0
Fibrisoma_limi	0	1	0	0	0	0	1	1
bacterium_enrichment	0	0	0	0	0	0	0	3
Helicobacter_pylori	0	0	2	1	0	0	0	0
bacterium_enrichment	1	1	0	0	1	0	0	0
Anaerolineales_bacterium	1	1	0	0	1	0	0	0
anaerobic_digester	1	0	0	1	0	0	0	1
Chloroflexaceae_bacterium	0	0	0	0	0	0	0	3
Nostoc_sp.	2	1	0	0	0	0	0	0
Fischerella_muscicola	2	1	0	0	0	0	0	0
Stanieria_cyanosphaera	1	1	0	0	0	0	0	1
Synechococcus_sp.	1	0	0	2	0	0	0	0
Thermus_scotoductus	1	0	0	1	0	0	0	1
Desulfovibrio_piger	1	0	0	0	2	0	0	0
iron-reducing_bacterium	0	0	2	0	0	0	1	0
Alicyclobacillus_acidocaldarius	0	0	1	2	0	0	0	0
Bacillus_trypoxylicola	1	2	0	0	0	0	0	0
Gracilibacillus_sp.	0	0	0	1	0	0	0	2
Caldalkalibacillus_thermarum	0	0	2	1	0	0	0	0
Lactobacillus_amylophilus	0	0	0	1	1	1	0	0
Leuconostoc_citreum	1	0	0	0	1	0	0	1
Gorillibacterium_sp.	0	0	1	0	0	2	0	0
Paenibacillus_ruminocola	1	0	0	0	1	0	0	1
Fonticella_tunisiensis	1	0	0	1	0	1	0	0
Lachnospiraceae_bacterium	0	0	1	2	0	0	0	0
bacterium_enrichment	0	1	1	0	0	0	1	0
Peptostreptococcaceae_bacterium	2	0	0	0	1	0	0	0
Peptoniphilus_grossensis	0	0	0	2	0	1	0	0
Thermosinus_carboxydivorans	0	2	0	0	1	0	0	0
Megasphaera_micronuciformis	0	0	0	2	0	0	0	1
Sandaracinus_amylolyticus	0	0	1	0	0	0	1	1
bacterium_enrichment	0	0	0	0	0	0	0	3
Succinivibrio_dextrinosolvens	1	0	2	0	0	0	0	0
Idiomarina_loihiensis	0	0	0	1	0	0	0	2
Aquaspirillum_serpens	1	0	0	0	2	0	0	0
Polynucleobacter_cosmopolitanus	0	0	1	0	0	0	1	1
Azospira_sp.	1	1	0	0	0	0	1	0
Spirochaeta_sp.	0	0	0	0	0	0	0	3
Tessaracoccus_rhinocerotis	1	0	0	0	0	0	0	1
Saccharomonospora_viridis	0	1	0	0	0	0	0	1
Porphyromonas_endodontalis	0	0	1	0	0	0	0	1
Prevotella_pallens	0	0	1	1	0	0	0	0
iron-reducing_enrichment	0	1	0	0	1	0	0	0
Alistipes_indistinctus	1	0	0	1	0	0	0	0
Spirosoma_aerolatum	0	0	0	0	0	0	0	2
Bacteroidetes_bacterium	2	0	0	0	0	0	0	0
Castanea_mollissima	0	0	2	0	0	0	0	0
Sphingobacterium_spiritivorum	0	0	0	0	0	0	0	2
Stauridium_tetras	1	0	0	1	0	0	0	0
Teleaulax_amphioxeia	0	0	0	2	0	0	0	0
Vischeria_sp.	0	0	0	0	0	0	1	1
Chroococcidiopsis_sp.	0	1	0	0	0	0	0	1
Meiothermus_silvanus	0	0	1	0	0	1	0	0
Desulfovibrio_oxamicus	1	0	0	0	0	0	0	1
Acholeplasma_sp.	1	0	1	0	0	0	0	0
Tumebacillus_avium	0	0	1	1	0	0	0	0
Oceanobacillus_caeni	0	0	0	1	0	0	0	1
Aerococcus_urinaeequi	1	0	0	0	0	0	0	1
Lactobacillus_acetotolerans	0	0	1	0	0	0	0	1
Lactobacillus_farciminis	0	0	2	0	0	0	0	0
Streptococcus_sp.	0	0	0	1	0	0	0	1
Thermobacillus_composti	0	0	1	1	0	0	0	0
Novibacillus_thermophilus	0	2	0	0	0	0	0	0
Thermoactinomycetaceae_bacterium	0	1	0	0	0	1	0	0
Spirochaetales_bacterium	0	0	1	0	0	1	0	0
Caldanaerobacter_subterraneus	0	0	0	1	0	1	0	0
myxobacterium_SMH-27-4	1	1	0	0	0	0	0	0
Rhodospirillaceae_bacterium	0	0	0	0	0	0	0	2
Taonella_mepensis	0	0	0	0	0	0	1	1
Salinarimonas_sp.	0	0	0	2	0	0	0	0
Acidithiobacillus_thiooxidans	1	0	0	0	1	0	0	0
Luteibacter_rhizovicinus	1	0	0	0	1	0	0	0
Xanthomonadaceae_bacterium	0	0	0	0	0	0	1	1
Roseimicrobium_gellanilyticum	0	0	0	0	0	0	0	2
bacterium_K2-78	0	0	0	0	0	1	0	0
bacterium_Ellin6517	0	0	0	0	0	0	0	1
Pontibacter_populi	0	0	1	0	0	0	0	0
Flectobacillus_rhizosphaerae	1	0	0	0	0	0	0	0
Chloroflexi_bacterium	0	0	0	0	0	0	0	1
Bracteacoccus_minor	0	1	0	0	0	0	0	0
Pectinodesmus_pectinatus	0	0	0	0	0	0	1	0
Cyanobium_sp.	1	0	0	0	0	0	0	0
Deferribacterales_bacterium	0	1	0	0	0	0	0	0
Deinococcus_papagonensis	0	0	0	1	0	0	0	0
Deinococcus_sp.	0	0	0	0	0	0	0	1
bacterium_MB7-1	0	0	0	0	0	1	0	0
Marinococcus_sp.	1	0	0	0	0	0	0	0
Enterococcus_cecorum	0	0	0	0	0	0	0	1
Lactobacillus_curvatus	0	0	0	0	0	0	0	1
Streptococcus_parauberis	0	0	0	0	0	0	0	1
Paenibacillus_taiwanensis	0	0	0	0	0	0	0	1
iron-reducing_bacterium	0	0	1	0	0	0	0	0
bacterium_NLAE-zl-C441	0	0	0	0	0	1	0	0
Selenomonadales_bacterium	1	0	0	0	0	0	0	0
Sorangiineae_bacterium	0	0	1	0	0	0	0	0
Chitiniphilus_sp.	0	0	0	0	0	0	0	1
Hydrogenophilus_thermoluteolus	1	0	0	0	0	0	0	0
Parasutterella_excrementihominis	0	0	1	0	0	0	0	0
Hydromonas_sp.	1	0	0	0	0	0	0	0
microbial_mat	0	0	0	0	1	0	0	0
bioreactor_sludge	0	0	0	0	0	1	0	0
bacterium_enrichment	0	1	0	0	0	0	0	0
Verrucomicrobium_spinosum	0	0	0	0	0	1	0	0
