# Supplementary material for: Microbiome Composition and Microbial Community Structure in Mosquito Vectors Aedes aegypti and Aedes albopictus in Northeastern Thailand, a Dengue-Endemic Area
Source: Insects. 2023 Feb 13;14(2):184. doi: 10.3390/insects14020184 (PMC9961164; doi:10.3390/insects14020184)
Supplement: Supplementary file 1 [file insects-14-00184-s001.zip › Table S4_28-12-22.xlsx]

## Sheet: common.otu
Table S4. List of common and unique OTUs in each sample category. (k;Kingdom, p;Phylum, c;Class, o;Order, f;Family, g;genus, species;s)
#OTU_number	Taxonomy	Mean sequence count of each OTU per sample group
		AeyL	AlbL	AeyF	AeyM	AlbF	AlbM	AeyW	AlbW
OTU_1	k__Bacteria; p__Proteobacteria; c__Alphaproteobacteria; o__Rickettsiales; f__Anaplasmataceae; g__Wolbachia	762	1697	3447	1429	39209	70452	716	407
OTU_10	k__Bacteria; p__Proteobacteria; c__Gammaproteobacteria; o__Burkholderiales; f__Rhodocyclaceae; g__C39; s__Rhodocyclaceae_bacterium	10964	4071	9	257	6	444	37	543
OTU_101	k__Bacteria; p__Proteobacteria; c__Alphaproteobacteria; o__Sphingomonadales; f__Sphingomonadaceae; g__Porphyrobacter; s__	25	24	28	71	9	30	90	498
OTU_1015	k__Bacteria; p__Proteobacteria; c__Alphaproteobacteria; o__Acetobacterales; f__Acetobacteraceae	10	24	3	2	3	8	26	37
OTU_102	k__Bacteria; p__Proteobacteria; c__Alphaproteobacteria; o__Rhizobiales; f__Rhizobiales_Incertae_Sedis; g__Phreatobacter; s__	94	375	2	3	106	18	10	15
OTU_1059	k__Bacteria; p__Actinobacteriota; c__Actinobacteria; o__Micrococcales; f__Micrococcaceae; g__Micrococcus; s__Micrococcus_luteus	8	6	12	5	9	7	1	2
OTU_107	k__Bacteria; p__Proteobacteria; c__Gammaproteobacteria; o__Burkholderiales; f__Comamonadaceae; g__Paucibacter	100	158	350	21	48	47	812	136
OTU_108	k__Bacteria; p__Proteobacteria; c__Alphaproteobacteria; o__Rhizobiales; f__Beijerinckiaceae; g__Methylocystis; s__	20	32	34	14	32	22	79	106
OTU_109	k__Bacteria; p__Proteobacteria; c__Alphaproteobacteria; o__Acetobacterales; f__Acetobacteraceae; g__; s__	4	1	82	2	2	7	427	17
OTU_1090	k__Bacteria; p__Proteobacteria; c__Alphaproteobacteria; o__Rhizobiales; f__Rhizobiaceae; g__Mesorhizobium	15	17	3	3	8	3	10	19
OTU_1091	k__Bacteria; p__Proteobacteria; c__Gammaproteobacteria; o__Burkholderiales; f__Burkholderiaceae; g__Limnobacter; s__Limnobacter_sp.	3	1	5	21	3	5	11	2
OTU_1095	k__Bacteria; p__Firmicutes; c__Clostridia; o__Lachnospirales; f__Lachnospiraceae; g__Blautia	4	2	83	754	40	33	1	49
OTU_11	k__Bacteria; p__Chloroflexi; c__Anaerolineae; o__RBG-13-54-9; f__RBG-13-54-9; g__RBG-13-54-9	93	49	280	6	59	17	3796	176
OTU_111	k__Bacteria; p__Proteobacteria; c__Alphaproteobacteria; o__Rhizobiales; f__Devosiaceae; g__Devosia; s__	12	7	73	46	18	52	212	267
OTU_1127	k__Bacteria; p__Proteobacteria; c__Gammaproteobacteria; o__Pseudomonadales; f__Pseudomonadaceae; g__Pseudomonas; s__Pseudomonas_peli	23	3	1	4	9	2	2	102
OTU_1148	k__Bacteria; p__Firmicutes; c__Clostridia; o__Clostridiales; f__Clostridiaceae; g__Clostridium_sensu_stricto_1	19	27	10	11	10	6	27	13
OTU_1161	k__Bacteria; p__Proteobacteria; c__Alphaproteobacteria; o__Rhodobacterales; f__Rhodobacteraceae; g__Defluviimonas; s__	64	309	49	8	75	13	150	81
OTU_117	k__Bacteria; p__Proteobacteria; c__Alphaproteobacteria; o__Rhizobiales; f__Devosiaceae; g__Devosia; s__Devosia_riboflavina	3	5	104	45	52	126	10	14
OTU_118	k__Bacteria; p__Proteobacteria; c__Alphaproteobacteria; o__Sphingomonadales; f__Sphingomonadaceae	230	113	278	36	82	72	777	366
OTU_12	k__Bacteria; p__Proteobacteria; c__Alphaproteobacteria; o__Rhizobiales; f__Rhizobiaceae; g__Shinella	364	1725	697	249	800	722	39	52
OTU_122	k__Bacteria; p__Proteobacteria; c__Alphaproteobacteria; o__Sphingomonadales; f__Sphingomonadaceae; g__Sphingomonas	9	4	136	82	43	130	59	35
OTU_123	k__Bacteria; p__Proteobacteria; c__Gammaproteobacteria; o__Burkholderiales; f__Burkholderiaceae; g__Polynucleobacter	89	24	118	4	2	10	403	73
OTU_1238	k__Bacteria; p__Actinobacteriota; c__Actinobacteria; o__Propionibacteriales; f__Nocardioidaceae; g__Nocardioides	3	7	2	1	1	2	4	8
OTU_124	k__Bacteria; p__Proteobacteria; c__Gammaproteobacteria; o__Burkholderiales; f__Comamonadaceae	659	186	84	39	24	16	1011	358
OTU_1274	k__Bacteria; p__Firmicutes; c__Bacilli; o__Lactobacillales	1	2	5	22	2	3	1	2
OTU_128	k__Bacteria; p__Proteobacteria; c__Gammaproteobacteria; o__Burkholderiales; f__Methylophilaceae; g__Methylophilus	112	275	29	6	71	28	80	86
OTU_130	k__Bacteria; p__Proteobacteria; c__Alphaproteobacteria; o__Rhizobiales; f__Rhizobiales_Incertae_Sedis; g__; s__	36	51	64	5	14	10	196	93
OTU_1306	k__Bacteria; p__Proteobacteria; c__Alphaproteobacteria; o__Rhodobacterales; f__Rhodobacteraceae; g__Amaricoccus; s__	2	2	3	4	4	2	2	40
OTU_131	k__Bacteria; p__Proteobacteria; c__Alphaproteobacteria; o__Sphingomonadales; f__Sphingomonadaceae; g__Sphingopyxis	46	9	70	12	20	32	156	67
OTU_1330	k__Bacteria; p__Proteobacteria; c__Alphaproteobacteria; o__Rhizobiales; f__Xanthobacteraceae; g__; s__	6	2	34	3	4	7	179	112
OTU_135	k__Bacteria; p__Actinobacteriota; c__Actinobacteria; o__Corynebacteriales; f__Mycobacteriaceae; g__Mycobacterium	443	50	5	1	56	2	34	21
OTU_138	k__Bacteria; p__Proteobacteria; c__Gammaproteobacteria; o__Burkholderiales; f__Burkholderiaceae; g__Lautropia; s__	93	11	72	6	1	4	298	23
OTU_1387	k__Bacteria; p__Actinobacteriota; c__Acidimicrobiia; o__Microtrichales; f__Microtrichaceae; g__IMCC26207; s__	7	7	6	1	3	2	18	11
OTU_14	k__Bacteria; p__Nitrospirota; c__Nitrospiria; o__Nitrospirales; f__Nitrospiraceae; g__Nitrospira; s__Nitrospira_defluvii	7	24	356	5	9	28	8753	169
OTU_1418	k__Bacteria; p__Firmicutes; c__Bacilli; o__Bacillales; f__Bacillaceae; g__Bacillus	11	8	1	5	1	6	3	13
OTU_1430	k__Bacteria; p__Firmicutes; c__Clostridia; o__Christensenellales; f__Christensenellaceae; g__; s__	3	1	2	1	3	1	1	6
OTU_1466	k__Bacteria; p__Proteobacteria; c__Gammaproteobacteria; o__Burkholderiales; f__Comamonadaceae	358	98	9	18	4	4	91	66
OTU_1484	k__Bacteria; p__Proteobacteria; c__Alphaproteobacteria; o__Tistrellales; f__Geminicoccaceae; g__Candidatus_Alysiosphaera; s__	2	1	1	2	1	1	3	17
OTU_149	k__Bacteria; p__Proteobacteria; c__Alphaproteobacteria; o__Caulobacterales; f__Caulobacteraceae; g__Asticcacaulis; s__Asticcacaulis_sp.	10	1	38	22	23	56	2	11
OTU_15	k__Bacteria; p__Proteobacteria; c__Alphaproteobacteria; o__Rhodobacterales; f__Rhodobacteraceae; g__Gemmobacter	439	2633	19	128	87	228	284	5220
OTU_152	k__Bacteria; p__Firmicutes; c__Clostridia; o__Oscillospirales; f__Ruminococcaceae; g__Faecalibacterium; s__Faecalibacterium_prausnitzii	58	1	92	773	119	49	3	44
OTU_154	k__Bacteria; p__Gemmatimonadota; c__Gemmatimonadetes; o__Gemmatimonadales; f__Gemmatimonadaceae	3	2	50	2	3	10	437	28
OTU_1556	k__Bacteria; p__Firmicutes; c__Bacilli; o__Staphylococcales; f__Staphylococcaceae; g__Staphylococcus	1	1	5	5	2	4	1	1
OTU_156	k__Bacteria; p__Bacteroidota; c__Bacteroidia; o__Cytophagales; f__Spirosomaceae; g__Emticicia; s__	45	100	5	9	4	7	51	361
OTU_1563	k__Bacteria; p__Proteobacteria; c__Gammaproteobacteria; o__Pseudomonadales; f__Moraxellaceae; g__Acinetobacter	5	2	5	25	5	4	8	7
OTU_157	k__Bacteria; p__Proteobacteria; c__Alphaproteobacteria; o__Rhizobiales; f__Xanthobacteraceae	14	3	59	4	3	11	203	199
OTU_16	k__Bacteria; p__Chloroflexi; c__Anaerolineae; o__Caldilineales; f__Caldilineaceae; g__	176	179	12	117	14	61	183	8160
OTU_162	k__Bacteria; p__Acidobacteriota; c__Acidobacteriae; o__Bryobacterales; f__Bryobacteraceae; g__Bryobacter; s__Acidobacteria_bacterium	2	1	64	2	1	8	311	55
OTU_163	k__Bacteria; p__Bacteroidota; c__Bacteroidia; o__Cytophagales; f__Spirosomaceae	14	107	2	12	1	9	39	282
OTU_164	k__Bacteria; p__Actinobacteriota; c__Acidimicrobiia; o__Microtrichales; f__; g__; s__	24	5	140	7	4	22	500	52
OTU_1701	k__Bacteria; p__Proteobacteria; c__Alphaproteobacteria; o__Rhizobiales; f__Hyphomicrobiaceae; g__Hyphomicrobium; s__Hyphomicrobium_denitrificans	6	4	9	6	1	2	15	29
OTU_171	k__Bacteria; p__Bdellovibrionota; c__Oligoflexia; o__Oligoflexales; f__Oligoflexales; g__Oligoflexus; s__	14	14	15	34	1	14	210	1226
OTU_173	k__Bacteria; p__Proteobacteria; c__Gammaproteobacteria; o__Xanthomonadales; f__Xanthomonadaceae; g__Pseudoxanthomonas	22	11	138	37	37	60	173	103
OTU_1738	k__Bacteria; p__Proteobacteria; c__Alphaproteobacteria; o__Sphingomonadales; f__Sphingomonadaceae; g__Novosphingobium	404	106	126	86	72	54	489	1087
OTU_174	k__Bacteria; p__Proteobacteria; c__Alphaproteobacteria; o__Rhodobacterales; f__Rhodobacteraceae; g__Rubellimicrobium; s__	18	23	4	6	13	5	30	147
OTU_177	k__Bacteria; p__Proteobacteria; c__Alphaproteobacteria; o__Acetobacterales; f__Acetobacteraceae	8	6	9	6	1	7	65	243
OTU_178	k__Bacteria; p__Proteobacteria; c__Alphaproteobacteria; o__Rhizobiales; f__Rhizobiales_Incertae_Sedis; g__Phreatobacter; s__	22	28	30	18	15	37	52	176
OTU_1803	k__Bacteria; p__Proteobacteria; c__Alphaproteobacteria; o__Rhizobiales; f__Methyloligellaceae; g__Methyloligellaceae; s__	1	1	2	1	1	1	2	7
OTU_186	k__Bacteria; p__Proteobacteria; c__Gammaproteobacteria; o__Pseudomonadales; f__Pseudomonadaceae; g__Pseudomonas	136	31	32	31	154	30	4	55
OTU_1862	k__Bacteria; p__Proteobacteria; c__Alphaproteobacteria; o__Rhodobacterales; f__Rhodobacteraceae; g__Rubellimicrobium; s__	7	7	2	6	1	4	5	46
OTU_188	k__Bacteria; p__Chloroflexi; c__Anaerolineae; o__SBR1031; f__A4b; g__A4b; s__	4	4	24	1	5	1	86	11
OTU_189	k__Bacteria; p__Proteobacteria; c__Alphaproteobacteria; o__Caulobacterales; f__Caulobacteraceae; g__Caulobacter	5	3	59	18	21	59	100	50
OTU_19	k__Bacteria; p__Proteobacteria; c__Alphaproteobacteria; o__Sphingomonadales; f__Sphingomonadaceae; g__Sandaracinobacter; s__	301	212	455	62	212	116	1535	600
OTU_192	k__Bacteria; p__Proteobacteria; c__Alphaproteobacteria; o__Rhizobiales; f__Beijerinckiaceae; g__Methylobacterium-Methylorubrum; s__Methylorubrum_extorquens	3	2	35	6	5	10	155	31
OTU_194	k__Bacteria; p__Proteobacteria; c__Gammaproteobacteria; o__Pseudomonadales; f__Moraxellaceae; g__Acinetobacter; s__Acinetobacter_baumannii	21	7	52	43	47	23	5	296
OTU_195	k__Bacteria; p__Proteobacteria; c__Gammaproteobacteria; o__Burkholderiales; f__Burkholderiaceae; g__Ralstonia; s__Ralstonia_pickettii	18	12	54	39	22	44	59	27
OTU_1985	k__Bacteria; p__Proteobacteria; c__Gammaproteobacteria; o__Burkholderiales; f__Comamonadaceae; g__Ramlibacter	4	13	7	1	3	3	70	39
OTU_199	k__Bacteria; p__Bacteroidota; c__Bacteroidia; o__Chitinophagales; f__Chitinophagaceae; g__Edaphobaculum; s__	31	28	4	1	3	5	36	19
OTU_2	k__Bacteria; p__Proteobacteria; c__Gammaproteobacteria; o__Aeromonadales; f__Aeromonadaceae; g__Aeromonas; s__Aeromonas_hydrophila	29	145	29276	782	46348	881	319	824
OTU_20	k__Bacteria; p__Actinobacteriota; c__Actinobacteria; o__Micrococcales; f__Microbacteriaceae	4452	1397	161	209	256	79	486	2149
OTU_201	k__Bacteria; p__Proteobacteria; c__Alphaproteobacteria; o__Rhizobiales; f__Kaistiaceae; g__Kaistia	9	14	121	4	13	28	227	113
OTU_203	k__Bacteria; p__Proteobacteria; c__Alphaproteobacteria; o__Rhizobiales; f__Rhizobiaceae; g__Mesorhizobium	5	10	63	2	3	10	166	41
OTU_206	k__Bacteria; p__Proteobacteria; c__Alphaproteobacteria; o__Caulobacterales; f__Caulobacteraceae; g__Brevundimonas	13	11	13	6	11	9	16	13
OTU_210	k__Bacteria; p__Proteobacteria; c__Alphaproteobacteria; o__; f__; g__	2	5	45	2	2	6	181	69
OTU_211	k__Bacteria; p__Proteobacteria; c__Alphaproteobacteria; o__Sphingomonadales; f__Sphingomonadaceae	41	9	49	4	2	7	105	33
OTU_218	k__Bacteria; p__Proteobacteria; c__Gammaproteobacteria; o__Burkholderiales; f__Comamonadaceae; g__Curvibacter; s__	273	16	1	7	3	6	20	28
OTU_22	k__Bacteria; p__Firmicutes; c__Clostridia; o__Peptostreptococcales-Tissierellales; f__Peptostreptococcaceae; g__Clostridioides; s__Clostridioides_difficile	355	1	1798	2087	408	436	83	244
OTU_2201	k__Bacteria; p__Proteobacteria; c__Alphaproteobacteria; o__Rhizobiales; f__Rhizobiaceae; g__Ochrobactrum	5	4	23	9	11	20	11	18
OTU_2212	k__Bacteria; p__Bacteroidota; c__Bacteroidia; o__Chitinophagales; f__Chitinophagaceae	2	9	6	1	1	2	110	27
OTU_224	k__Bacteria; p__Proteobacteria; c__Alphaproteobacteria; o__Rhizobiales; f__Pleomorphomonadaceae; g__Chthonobacter; s__	6	13	1	5	4	3	4	216
OTU_2241	k__Bacteria; p__Proteobacteria; c__Alphaproteobacteria; o__Rhizobiales; f__Rhizobiaceae; g__Allorhizobium-Neorhizobium-Pararhizobium-Rhizobium	439	303	60	27	170	42	91	87
OTU_2263	k__Bacteria; p__Actinobacteriota; c__Acidimicrobiia; o__Microtrichales; f__Ilumatobacteraceae; g__CL500-29_marine_group; s__	3	5	3	3	2	3	19	78
OTU_231	k__Bacteria; p__Actinobacteriota; c__Actinobacteria; o__Corynebacteriales; f__Nocardiaceae; g__Gordonia	182	27	31	9	3	5	78	17
OTU_2328	k__Bacteria; p__Firmicutes; c__Clostridia; o__Clostridiales; f__Clostridiaceae; g__Clostridium_sensu_stricto_1	15	2	5	31	13	7	3	6
OTU_2357	k__Bacteria; p__Proteobacteria; c__Alphaproteobacteria; o__Sphingomonadales; f__Sphingomonadaceae; g__Croceicoccus; s__Sphingomonas_sp.	4	7	49	11	13	37	50	99
OTU_2387	k__Bacteria; p__Proteobacteria; c__Gammaproteobacteria; o__Burkholderiales; f__Comamonadaceae; g__Aquabacterium; s__Aquabacterium_citratiphilum	1145	189	2	28	13	2	22	29
OTU_24	k__Bacteria; p__Proteobacteria; c__Gammaproteobacteria; o__Burkholderiales; f__Comamonadaceae	198	30	445	4	3	43	4550	151
OTU_242	k__Bacteria; p__Proteobacteria; c__Gammaproteobacteria; o__Aeromonadales; f__Aeromonadaceae; g__Aeromonas	13	14	12421	124	950	133	112	24
OTU_244	k__Bacteria; p__Proteobacteria; c__Gammaproteobacteria; o__Pseudomonadales; f__Pseudomonadaceae; g__Pseudomonas; s__Pseudomonas_otitidis	29	58	42	19	91	41	32	84
OTU_246	k__Bacteria; p__Chloroflexi; c__Chloroflexia; o__Chloroflexales; f__Roseiflexaceae	5	4	1	5	1	1	8	212
OTU_249	k__Bacteria; p__Actinobacteriota; c__Acidimicrobiia; o__Microtrichales	8	1	49	6	2	7	173	66
OTU_25	k__Bacteria; p__Proteobacteria; c__Gammaproteobacteria; o__Burkholderiales; f__Comamonadaceae; g__Aquabacterium; s__	4342	246	78	101	11	11	148	118
OTU_250	k__Bacteria; p__Proteobacteria; c__Alphaproteobacteria; o__Acetobacterales; f__Acetobacteraceae	133	25	7	12	2	1	30	9
OTU_253	k__Bacteria; p__Proteobacteria; c__Alphaproteobacteria; o__Sphingomonadales; f__Sphingomonadaceae; g__Sphingobium; s__Sphingobium_yanoikuyae	4	3	21	5	3	13	72	40
OTU_255	k__Bacteria; p__Proteobacteria; c__Gammaproteobacteria; o__Cellvibrionales; f__Halieaceae; g__OM60(NOR5)_clade; s__	12	11	6	2	12	3	22	26
OTU_256	k__Bacteria; p__Firmicutes; c__Clostridia; o__Peptostreptococcales-Tissierellales; f__Peptostreptococcaceae; g__Romboutsia; s__Romboutsia_ilealis	21	5	40	132	47	24	6	13
OTU_26	k__Bacteria; p__Firmicutes; c__Clostridia; o__Lachnospirales; f__Lachnospiraceae; g__Blautia	321	1	2200	2778	400	462	77	204
OTU_260	k__Bacteria; p__Proteobacteria; c__Alphaproteobacteria; o__Rhodobacterales; f__Rhodobacteraceae; g__Rhodobacter; s__Rhodobacter_sphaeroides	44	104	29	29	16	51	36	567
OTU_266	k__Bacteria; p__Proteobacteria; c__Gammaproteobacteria; o__Enterobacterales; f__Yersiniaceae; g__Rahnella1; s__Rahnella_aquatilis	79	12	165	7	3	2	3	5
OTU_2662	k__Bacteria; p__Cyanobacteria; c__Cyanobacteriia; o__Chloroplast; f__Chloroplast; g__Chloroplast	5	2	11	11	2	3	8	10
OTU_2667	k__Bacteria; p__Proteobacteria; c__Alphaproteobacteria; o__Rhizobiales; f__Rhizobiales_Incertae_Sedis; g__Phreatobacter; s__	10	11	19	10	3	8	88	79
OTU_268	k__Bacteria; p__Bacteroidota; c__Bacteroidia; o__Chitinophagales; f__Chitinophagaceae; g__Sediminibacterium; s__	15	15	7	6	1	6	120	91
OTU_269	k__Bacteria; p__Bacteroidota; c__Bacteroidia; o__Sphingobacteriales; f__NS11-12_marine_group; g__NS11-12_marine_group; s__	3	9	9	1	1	1	245	11
OTU_272	k__Bacteria; p__Proteobacteria; c__Alphaproteobacteria; o__Sphingomonadales; f__Sphingomonadaceae; g__Altererythrobacter	12	2	20	12	10	24	8	66
OTU_274	k__Bacteria; p__Proteobacteria; c__Gammaproteobacteria; o__Xanthomonadales; f__Xanthomonadaceae; g__Arenimonas; s__	23	4	1	13	4	6	20	129
OTU_2746	k__Bacteria; p__Actinobacteriota; c__Acidimicrobiia; o__Microtrichales; f__Iamiaceae; g__Iamia	7	14	3	4	3	4	6	17
OTU_2762	k__Bacteria; p__Proteobacteria; c__Alphaproteobacteria; o__Sphingomonadales; f__Sphingomonadaceae; g__Erythrobacter; s__Erythrobacter_sp.	1	1	32	9	8	28	32	13
OTU_28	k__Bacteria; p__Proteobacteria; c__Gammaproteobacteria; o__Burkholderiales; f__Comamonadaceae; g__Comamonas; s__Comamonas_testosteroni	14	3	17	31	2	4	197	5321
OTU_281	k__Bacteria; p__Proteobacteria; c__Gammaproteobacteria; o__Enterobacterales; f__Enterobacteriaceae; g__Citrobacter	52	7	397	970	53	36	6	21
OTU_282	k__Bacteria; p__Actinobacteriota; c__Acidimicrobiia; o__Microtrichales; f__Microtrichaceae; g__IMCC26207; s__	9	33	20	11	12	39	5	19
OTU_284	k__Bacteria; p__Actinobacteriota; c__Actinobacteria; o__PeM15; f__PeM15; g__PeM15; s__	18	24	42	2	3	8	100	30
OTU_289	k__Bacteria; p__Proteobacteria; c__Gammaproteobacteria; o__R7C24; f__R7C24; g__R7C24; s__	3	2	83	1	2	10	451	129
OTU_294	k__Bacteria; p__Proteobacteria; c__Alphaproteobacteria; o__Rhizobiales; f__Rhizobiaceae; g__Aminobacter; s__	9	42	9	2	12	7	19	65
OTU_3	k__Bacteria; p__Proteobacteria; c__Gammaproteobacteria; o__Enterobacterales; f__Yersiniaceae; g__Serratia	19007	59532	64	162	3457	2561	2	59
OTU_30	k__Bacteria; p__Proteobacteria; c__Gammaproteobacteria; o__Burkholderiales; f__Sutterellaceae; g__Parasutterella; s__	259	3	1156	2079	294	203	38	114
OTU_3026	k__Bacteria; p__Actinobacteriota; c__Actinobacteria; o__Corynebacteriales; f__Mycobacteriaceae; g__Mycobacterium	4	7	4	2	3	4	17	3
OTU_309	k__Bacteria; p__Proteobacteria; c__Gammaproteobacteria; o__Xanthomonadales; f__Xanthomonadaceae; g__Pseudoxanthomonas; s__Pseudoxanthomonas_mexicana	6	7	22	10	10	20	24	18
OTU_311	k__Bacteria; p__Actinobacteriota; c__Actinobacteria; o__Micrococcales; f__Microbacteriaceae	16	14	62	4	4	7	225	52
OTU_313	k__Bacteria; p__Proteobacteria; c__Gammaproteobacteria; o__Burkholderiales; f__Sutterellaceae; g__; s__	11	1	5	3	2	6	61	307
OTU_317	k__Bacteria; p__Actinobacteriota; c__Actinobacteria; o__Micrococcales	36	92	6	4	21	4	7	2
OTU_318	k__Bacteria; p__Chloroflexi; c__Anaerolineae; o__SBR1031; f__A4b	12	7	17	10	10	15	27	107
OTU_32	k__Bacteria; p__Proteobacteria; c__Gammaproteobacteria; o__Burkholderiales; f__Comamonadaceae; g__Hydrogenophaga	303	1987	24	21	134	111	57	370
OTU_3241	k__Bacteria; p__Proteobacteria; c__Alphaproteobacteria; o__Caulobacterales; f__Caulobacteraceae; g__Brevundimonas; s__Brevundimonas_vesicularis	99	15	44	9	36	21	129	115
OTU_328	k__Bacteria; p__Proteobacteria; c__Alphaproteobacteria; o__Rhizobiales; f__Hyphomicrobiaceae; g__Hyphomicrobium; s__	10	17	39	7	7	7	155	104
OTU_3295	k__Bacteria; p__Proteobacteria; c__Alphaproteobacteria; o__Rhizobiales; f__Rhizobiaceae; g__Chelativorans	1	8	5	7	2	8	10	30
OTU_3328	k__Bacteria; p__Firmicutes; c__Clostridia; o__Peptostreptococcales-Tissierellales; f__Peptostreptococcaceae	12	20	11	16	10	2	7	6
OTU_335	k__Bacteria; p__Proteobacteria; c__Alphaproteobacteria; o__Rhizobiales; f__Hyphomicrobiaceae; g__Pedomicrobium	5	2	61	6	5	11	161	50
OTU_336	k__Bacteria; p__Firmicutes; c__Clostridia; o__Lachnospirales; f__Lachnospiraceae; g__Agathobacter; s__Eubacterium_rectale	26	1	33	193	60	22	1	19
OTU_337	k__Bacteria; p__Proteobacteria; c__Gammaproteobacteria; o__Burkholderiales; f__Oxalobacteraceae	8	13	29	2	1	6	132	20
OTU_338	k__Bacteria; p__Firmicutes; c__Clostridia; o__Lachnospirales; f__Lachnospiraceae; g__Eubacterium_hallii_group	7	1	77	239	41	42	2	49
OTU_341	k__Bacteria; p__Actinobacteriota; c__Actinobacteria; o__Frankiales; f__Sporichthyaceae; g__Longivirga; s__	29	11	59	4	5	8	143	62
OTU_344	k__Bacteria; p__Proteobacteria; c__Alphaproteobacteria; o__Rhizobiales; f__Hyphomicrobiaceae; g__Hyphomicrobium; s__	11	15	20	4	6	4	53	67
OTU_361	k__Bacteria; p__Actinobacteriota; c__Acidimicrobiia; o__Microtrichales; f__Ilumatobacteraceae; g__CL500-29_marine_group	5	7	6	3	2	2	19	129
OTU_3619	k__Bacteria; p__Bacteroidota; c__Bacteroidia; o__Sphingobacteriales; f__NS11-12_marine_group; g__NS11-12_marine_group; s__	1	9	2	1	1	1	20	4
OTU_369	k__Bacteria; p__Proteobacteria; c__Alphaproteobacteria; o__Rhodobacterales; f__Rhodobacteraceae	45	148	18	40	19	31	109	766
OTU_3696	k__Bacteria; p__Proteobacteria; c__Alphaproteobacteria; o__Reyranellales; f__Reyranellaceae; g__Reyranella	7	1	21	14	4	8	77	300
OTU_37	k__Bacteria; p__Proteobacteria; c__Gammaproteobacteria; o__Pseudomonadales; f__Moraxellaceae; g__Acinetobacter; s__Acinetobacter_junii	12	6	7	281	5	10	10	2977
OTU_372	k__Bacteria; p__Acidobacteriota; c__Acidobacteriae; o__Bryobacterales; f__Bryobacteraceae; g__Bryobacter; s__	5	16	38	3	3	5	115	27
OTU_3724	k__Bacteria; p__Proteobacteria; c__Gammaproteobacteria; o__Burkholderiales; f__Comamonadaceae; g__Delftia	6	2	12	8	37	6	28	10
OTU_3769	k__Bacteria; p__Proteobacteria; c__Gammaproteobacteria; o__Burkholderiales; f__Comamonadaceae	3	4	6	2	12	3	3	147
OTU_378	k__Bacteria; p__Proteobacteria; c__Alphaproteobacteria; o__Micropepsales; f__Micropepsaceae; g__; s__	7	2	63	11	2	8	177	87
OTU_380	k__Bacteria; p__Actinobacteriota; c__Acidimicrobiia; o__IMCC26256; f__IMCC26256; g__IMCC26256; s__	4	1	25	1	2	3	75	29
OTU_3809	k__Bacteria; p__Proteobacteria; c__Alphaproteobacteria; o__Sphingomonadales; f__Sphingomonadaceae	56	27	1	30	3	23	49	352
OTU_382	k__Bacteria; p__Actinobacteriota; c__Acidimicrobiia; o__Microtrichales; f__Iamiaceae; g__Iamia	4	5	27	2	2	3	66	15
OTU_3835	k__Bacteria; p__Proteobacteria; c__Alphaproteobacteria; o__Sphingomonadales; f__Sphingomonadaceae; g__Novosphingobium	25	6	7	5	3	4	15	6
OTU_384	k__Bacteria; p__Cyanobacteria; c__Cyanobacteriia; o__Chloroplast; f__Chloroplast; g__Chloroplast	3	1	2	7	2	93	10	24
OTU_392	k__Bacteria; p__Proteobacteria; c__Gammaproteobacteria; o__Burkholderiales; f__Comamonadaceae; g__Pseudorhodoferax; s__	2	2	10	7	7	12	2	4
OTU_3924	k__Bacteria; p__Proteobacteria; c__Gammaproteobacteria; o__Burkholderiales; f__Comamonadaceae; g__Hydrogenophaga	8	10	3	3	7	3	1	18
OTU_3959	k__Bacteria; p__Proteobacteria; c__Gammaproteobacteria; o__Burkholderiales; f__Comamonadaceae; g__Acidovorax	29	185	20	3	7	19	46	91
OTU_397	k__Bacteria; p__Proteobacteria; c__Alphaproteobacteria; o__Caulobacterales; f__Caulobacteraceae; g__Phenylobacterium; s__	8	2	170	12	7	34	756	107
OTU_398	k__Bacteria; p__Proteobacteria; c__Alphaproteobacteria; o__Rhizobiales	15	64	1	3	12	2	8	17
OTU_4	k__Bacteria; p__Proteobacteria; c__Gammaproteobacteria; o__Enterobacterales; f__Enterobacteriaceae; g__Escherichia-Shigella; s__Escherichia_coli	1299	9	12105	16632	1450	948	149	369
OTU_4009	k__Bacteria; p__Proteobacteria; c__Alphaproteobacteria; o__Rhodobacterales; f__Rhodobacteraceae	37	23	12	10	8	9	98	359
OTU_401	k__Bacteria; p__Proteobacteria; c__Gammaproteobacteria; o__Burkholderiales; f__Burkholderiaceae; g__Lautropia; s__	14	19	3	5	2	10	6	51
OTU_403	k__Bacteria; p__Proteobacteria; c__Gammaproteobacteria; o__Pseudomonadales; f__Moraxellaceae; g__Enhydrobacter; s__Moraxella_osloensis	13	3	16	64	10	2	2	1
OTU_407	k__Bacteria; p__Proteobacteria; c__Gammaproteobacteria; o__Gammaproteobacteria_Incertae_Sedis; f__Unknown_Family; g__Acidibacter; s__	6	1	27	4	1	4	123	29
OTU_41	k__Bacteria; p__Proteobacteria; c__Alphaproteobacteria; o__Sphingomonadales; f__Sphingomonadaceae; g__Novosphingobium	163	36	489	169	170	458	400	338
OTU_413	k__Bacteria; p__Proteobacteria; c__Gammaproteobacteria; o__Burkholderiales; f__Comamonadaceae	10	42	15	1	5	3	182	15
OTU_4275	k__Bacteria; p__Proteobacteria; c__Gammaproteobacteria; o__Pseudomonadales; f__Pseudomonadaceae; g__Pseudomonas	3	3	6	60	2	5	6	90
OTU_43	k__Bacteria; p__Proteobacteria; c__Gammaproteobacteria; o__Enterobacterales; f__Morganellaceae; g__Morganella; s__Morganella_morganii	123	1	1045	1395	148	123	16	37
OTU_432	k__Bacteria; p__Proteobacteria; c__Gammaproteobacteria; o__Burkholderiales; f__Comamonadaceae; g__Rhizobacter; s__	13	5	11	3	1	2	81	38
OTU_4328	k__Bacteria; p__Proteobacteria; c__Alphaproteobacteria; o__Rhizobiales; f__Rhizobiaceae	2	6	54	6	4	15	150	41
OTU_4378	k__Bacteria; p__Spirochaetota; c__Spirochaetia; o__Spirochaetales; f__Spirochaetaceae; g__; s__Spironema_culicis	75	12335	2	2	15	5614	16	31
OTU_4399	k__Bacteria; p__Proteobacteria; c__Alphaproteobacteria; o__Rhodobacterales; f__Rhodobacteraceae; g__Rhodobacter	492	201	211	122	26	101	933	1870
OTU_4403	k__Bacteria; p__Actinobacteriota; c__Actinobacteria; o__Micrococcales; f__Demequinaceae; g__Demequina	3	14	23	12	16	21	6	40
OTU_4442	k__Bacteria; p__Proteobacteria; c__Alphaproteobacteria; o__Sphingomonadales; f__Sphingomonadaceae; g__Sphingomonas	13	18	79	13	12	38	175	48
OTU_446	k__Bacteria; p__Bacteroidota; c__Bacteroidia; o__Cytophagales; f__Spirosomaceae; g__Runella	5	67	5	2	2	10	3	36
OTU_451	k__Bacteria; p__Proteobacteria; c__Gammaproteobacteria; o__Burkholderiales; f__Rhodocyclaceae; g__Methyloversatilis	8	3	19	27	7	7	100	17
OTU_4527	k__Bacteria; p__Proteobacteria; c__Alphaproteobacteria; o__Sphingomonadales; f__Sphingomonadaceae	14	44	12	3	20	10	11	15
OTU_454	k__Bacteria; p__Firmicutes; c__Clostridia; o__Clostridiales; f__Clostridiaceae; g__Clostridium_sensu_stricto_3; s__Clostridiaceae_bacterium	15	3	20	3	1	3	17	13
OTU_46	k__Bacteria; p__Proteobacteria; c__Alphaproteobacteria; o__Rhizobiales; f__Xanthobacteraceae; g__Ancylobacter; s__Ancylobacter_sp.	1	2	170	72	71	196	10	25
OTU_471	k__Bacteria; p__Firmicutes; c__Bacilli; o__Lactobacillales; f__Streptococcaceae; g__Streptococcus	33	1	18	153	19	9	1	22
OTU_476	k__Bacteria; p__Proteobacteria; c__Alphaproteobacteria; o__Acetobacterales; f__Acetobacteraceae; g__; s__Paracraurococcus_sp.	14	6	5	3	4	2	22	25
OTU_478	k__Bacteria; p__Bdellovibrionota; c__Oligoflexia; o__0319-6G20; f__0319-6G20; g__0319-6G20; s__	8	1	2	8	2	1	5	87
OTU_48	k__Bacteria; p__Bacteroidota; c__Bacteroidia; o__Cytophagales; f__Spirosomaceae; g__Runella	67	1951	11	5	3	45	163	140
OTU_483	k__Bacteria; p__Chloroflexi; c__Anaerolineae; o__SJA-15; f__SJA-15; g__SJA-15; s__	4	4	4	2	2	3	29	80
OTU_4857	k__Bacteria; p__Firmicutes; c__Clostridia; o__Lachnospirales; f__Lachnospiraceae; g__Ruminococcus_gnavus_group; s__	7	1	9	74	13	10	1	3
OTU_489	k__Bacteria; p__Proteobacteria; c__Gammaproteobacteria; o__Enterobacterales; f__Enterobacteriaceae; g__Kosakonia	40	1	340	546	61	46	4	17
OTU_494	k__Bacteria; p__Proteobacteria; c__Alphaproteobacteria; o__Rhizobiales; f__Xanthobacteraceae; g__Rhodopseudomonas; s__Rhodopseudomonas_palustris	4	2	16	3	6	8	33	44
OTU_5	k__Bacteria; p__Verrucomicrobiota; c__Verrucomicrobiae; o__Opitutales; f__Opitutaceae	67	346	1	442	6	45	189	24909
OTU_50	k__Bacteria; p__Acidobacteriota; c__Vicinamibacteria; o__Vicinamibacterales; f__Vicinamibacteraceae; g__Vicinamibacteraceae; s__	10	4	291	2	2	25	2499	132
OTU_505	k__Bacteria; p__Proteobacteria; c__Gammaproteobacteria; o__Pseudomonadales; f__Moraxellaceae; g__Perlucidibaca; s__	25	6	4	22	10	1	4	1
OTU_508	k__Bacteria; p__Proteobacteria; c__Alphaproteobacteria; o__Rhizobiales; f__A0839; g__A0839	13	3	29	4	3	11	150	39
OTU_512	k__Bacteria; p__Firmicutes; c__Bacilli; o__Bacillales; f__Bacillaceae; g__Bacillus; s__Bacillus_indicus	11	33	1	10	1	7	6	154
OTU_52	k__Bacteria; p__Firmicutes; c__Clostridia; o__Lachnospirales; f__Lachnospiraceae; g__Blautia	8	3	173	1998	103	100	3	99
OTU_523	k__Bacteria; p__Actinobacteriota; c__Actinobacteria; o__Corynebacteriales; f__Mycobacteriaceae; g__Mycobacterium; s__Mycobacterium_neoaurum	147	59	11	9	15	6	27	24
OTU_533	k__Bacteria; p__Bacteroidota; c__Bacteroidia; o__Cytophagales; f__Spirosomaceae; g__Arsenicibacter	6	17	6	2	2	7	13	29
OTU_536	k__Bacteria; p__Proteobacteria; c__Alphaproteobacteria; o__Caulobacterales; f__Caulobacteraceae; g__Caulobacter; s__	5	1	61	5	6	14	194	65
OTU_5365	k__Bacteria; p__Proteobacteria; c__Gammaproteobacteria; o__Burkholderiales; f__Comamonadaceae	23	21	1	2	11	2	32	331
OTU_54	k__Bacteria; p__Nitrospirota; c__Nitrospiria; o__Nitrospirales; f__Nitrospiraceae; g__Nitrospira	7	4	192	2	3	7	1618	48
OTU_55	k__Bacteria; p__Proteobacteria; c__Alphaproteobacteria; o__Rhizobiales; f__Beijerinckiaceae; g__Bosea; s__Bosea_sp.	75	206	406	138	228	357	464	358
OTU_551	k__Bacteria; p__Bacteroidota; c__Bacteroidia; o__Bacteroidales; f__Tannerellaceae; g__Parabacteroides; s__Parabacteroides_distasonis	2	1	4	240	3	3	2	2
OTU_5553	k__Bacteria; p__Nitrospirota; c__Nitrospiria; o__Nitrospirales; f__Nitrospiraceae; g__Nitrospira	9	4	58	2	2	5	879	57
OTU_56	k__Bacteria; p__Actinobacteriota; c__Actinobacteria; o__PeM15; f__PeM15; g__PeM15; s__	1508	118	8	68	3	3	24	162
OTU_564	k__Bacteria; p__Actinobacteriota; c__Actinobacteria; o__Corynebacteriales; f__Corynebacteriaceae; g__Corynebacterium; s__Corynebacterium_tuberculostearicum	7	2	13	23	4	8	1	17
OTU_567	k__Bacteria; p__Actinobacteriota; c__Actinobacteria; o__Propionibacteriales; f__Nocardioidaceae; g__Nocardioides	3	1	8	4	1	4	45	11
OTU_5677	k__Bacteria; p__Actinobacteriota; c__Acidimicrobiia; o__Microtrichales; f__Iamiaceae; g__Iamia; s__Aquihabitans_daechungensis	15	21	2	5	4	5	15	63
OTU_5691	k__Bacteria; p__Proteobacteria; c__Alphaproteobacteria; o__Acetobacterales; f__Acetobacteraceae	14	34	14	13	4	12	58	64
OTU_57	k__Bacteria; p__Proteobacteria; c__Alphaproteobacteria; o__Rhodobacterales; f__Rhodobacteraceae	71	212	11	63	25	45	165	1104
OTU_572	k__Bacteria; p__Proteobacteria; c__Alphaproteobacteria; o__Tistrellales; f__Geminicoccaceae; g__Candidatus_Alysiosphaera; s__	12	4	19	3	2	6	39	21
OTU_573	k__Bacteria; p__Proteobacteria; c__Gammaproteobacteria; o__Burkholderiales; f__Comamonadaceae; g__Variovorax; s__Variovorax_sp.	11	33	33	40	17	20	34	43
OTU_580	k__Bacteria; p__Firmicutes; c__Bacilli; o__Bacillales; f__Bacillaceae; g__Bacillus; s__Bacillus_aryabhattai	29	12	12	6	6	13	2	10
OTU_587	k__Bacteria; p__Proteobacteria; c__Gammaproteobacteria; o__Burkholderiales; f__Comamonadaceae; g__Hydrogenophaga	9	36	3	6	3	5	10	80
OTU_59	k__Bacteria; p__Proteobacteria; c__Alphaproteobacteria; o__Acetobacterales; f__Acetobacteraceae; g__Roseomonas; s__	30	83	248	10	23	54	1311	441
OTU_6	k__Bacteria; p__Firmicutes; c__Bacilli; o__Bacillales; f__Planococcaceae; g__Lysinibacillus; s__Lysinibacillus_sphaericus	37503	844	17	342	495	3	41	2
OTU_60	k__Bacteria; p__Proteobacteria; c__Gammaproteobacteria; o__Enterobacterales; f__Enterobacteriaceae; g__Klebsiella; s__Klebsiella_pneumoniae	156	3	1386	1870	178	130	22	53
OTU_604	k__Bacteria; p__Proteobacteria; c__Alphaproteobacteria; o__Rhizobiales; f__Devosiaceae	10	15	9	9	2	14	16	44
OTU_6133	k__Bacteria; p__Actinobacteriota; c__Acidimicrobiia; o__Microtrichales; f__Ilumatobacteraceae; g__Ilumatobacter; s__	4	3	5	3	1	1	12	138
OTU_6139	k__Bacteria; p__Actinobacteriota; c__Actinobacteria; o__Corynebacteriales; f__Nocardiaceae; g__Gordonia	43	14	21	2	2	1	46	7
OTU_6300	k__Bacteria; p__Proteobacteria; c__Alphaproteobacteria; o__Rhizobiales; f__Rhizobiales_Incertae_Sedis; g__; s__	7	7	7	2	4	1	26	12
OTU_633	k__Bacteria; p__Proteobacteria; c__Alphaproteobacteria; o__Sphingomonadales; f__Sphingomonadaceae; g__Sphingopyxis	17	4	48	18	19	38	66	36
OTU_64	k__Bacteria; p__Proteobacteria; c__Alphaproteobacteria; o__Rhizobiales; f__Rhizobiales_Incertae_Sedis; g__; s__	511	247	204	117	9	109	830	921
OTU_65	k__Bacteria; p__Proteobacteria; c__Gammaproteobacteria; o__Xanthomonadales; f__Xanthomonadaceae; g__Stenotrophomonas	14	2	226	63	1393	94	353	104
OTU_650	k__Bacteria; p__Proteobacteria; c__Alphaproteobacteria; o__Rhodobacterales; f__Rhodobacteraceae; g__Paracoccus	1	1	20	5	2	6	8	18
OTU_6571	k__Bacteria; p__Actinobacteriota; c__Actinobacteria; o__PeM15; f__PeM15; g__PeM15; s__	148	26	20	5	25	2	67	24
OTU_663	k__Bacteria; p__Actinobacteriota; c__Actinobacteria; o__Micrococcales; f__Cellulomonadaceae; g__Cellulomonas	5	8	13	7	6	10	18	41
OTU_664	k__Bacteria; p__Proteobacteria; c__Alphaproteobacteria; o__Rhizobiales; f__Xanthobacteraceae; g__Xanthobacter; s__	5	10	6	2	4	4	21	41
OTU_67	k__Bacteria; p__Proteobacteria; c__Alphaproteobacteria; o__Acetobacterales; f__Acetobacteraceae; g__Roseomonas	34	57	100	52	22	38	510	585
OTU_673	k__Bacteria; p__Proteobacteria; c__Gammaproteobacteria; o__Cellvibrionales; f__Cellvibrionaceae; g__Cellvibrio	10	15	15	9	7	13	16	39
OTU_68	k__Bacteria; p__Bacteroidota; c__Bacteroidia; o__Chitinophagales; f__Chitinophagaceae; g__Ferruginibacter; s__	101	38	60	1	4	11	1339	32
OTU_682	k__Bacteria; p__Firmicutes; c__Clostridia; o__Clostridiales; f__Clostridiaceae; g__Clostridium_sensu_stricto_1; s__Clostridium_perfringens	1	3	3	47	2	1	1	2
OTU_6827	k__Bacteria; p__Proteobacteria; c__Gammaproteobacteria; o__Burkholderiales; f__Comamonadaceae; g__Aquabacterium; s__	255	531	21	4	33	39	164	73
OTU_69	k__Bacteria; p__Acidobacteriota; c__Blastocatellia; o__Blastocatellales; f__Blastocatellaceae; g__Blastocatella; s__	30	12	116	12	4	12	1046	272
OTU_690	k__Bacteria; p__Proteobacteria; c__Alphaproteobacteria; o__Rickettsiales; f__Anaplasmataceae; g__Wolbachia	755	1549	2172	944	31534	22356	66	44
OTU_693	k__Bacteria; p__Proteobacteria; c__Gammaproteobacteria; o__Burkholderiales; f__Methylophilaceae; g__Methylophilus; s__	4	9	10	4	9	10	2	2
OTU_696	k__Bacteria; p__Firmicutes; c__Bacilli; o__Lactobacillales; f__Lactobacillaceae; g__Lactobacillus; s__Lactobacillus_salivarius	76	18	2	8	3	26	2	2
OTU_697	k__Bacteria; p__Chloroflexi; c__Anaerolineae; o__Caldilineales; f__Caldilineaceae; g__; s__	12	18	6	7	3	5	40	470
OTU_7	k__Bacteria; p__Spirochaetota; c__Spirochaetia; o__Spirochaetales; f__Spirochaetaceae; g__; s__Spironema_culicis	1411	2351	24	31	93	6274	3	14
OTU_7037	k__Bacteria; p__Proteobacteria; c__Alphaproteobacteria; o__Rhodobacterales; f__Rhodobacteraceae	2	2	1	3	1	2	15	29
OTU_706	k__Bacteria; p__Actinobacteriota; c__Actinobacteria; o__Micrococcales; f__Microbacteriaceae; g__Agromyces	1	4	3	2	1	5	3	15
OTU_71	k__Bacteria; p__Proteobacteria; c__Alphaproteobacteria; o__Sphingomonadales; f__Sphingomonadaceae; g__SD04E11; s__Sphingomonas_piscinae	14	4	167	1	6	39	873	73
OTU_711	k__Bacteria; p__Actinobacteriota; c__Acidimicrobiia; o__Microtrichales; f__Ilumatobacteraceae; g__; s__	1	2	2	1	2	1	3	16
OTU_7159	k__Bacteria; p__Proteobacteria; c__Alphaproteobacteria; o__Sphingomonadales; f__Sphingomonadaceae	101	32	21	44	4	32	136	348
OTU_718	k__Bacteria; p__Proteobacteria; c__Alphaproteobacteria; o__Rhodobacterales; f__Rhodobacteraceae; g__Amaricoccus; s__	2	5	2	2	2	1	5	127
OTU_730	k__Bacteria; p__Actinobacteriota; c__Actinobacteria; o__Micrococcales; f__Microbacteriaceae; g__Leucobacter	10	23	9	3	3	1	7	6
OTU_742	k__Bacteria; p__Proteobacteria; c__Gammaproteobacteria; o__Burkholderiales; f__Comamonadaceae	2	8	5	1	1	2	44	6
OTU_7459	k__Bacteria; p__Proteobacteria; c__Alphaproteobacteria; o__Sphingomonadales; f__Sphingomonadaceae	16	5	51	18	14	42	69	32
OTU_748	k__Bacteria; p__Proteobacteria; c__Alphaproteobacteria; o__Caulobacterales; f__Caulobacteraceae	9	9	27	5	3	9	78	23
OTU_75	k__Bacteria; p__Proteobacteria; c__Gammaproteobacteria; o__Burkholderiales; f__Comamonadaceae	70	69	118	7	20	26	2025	250
OTU_762	k__Bacteria; p__Proteobacteria; c__Gammaproteobacteria; o__Burkholderiales; f__Rhodocyclaceae; g__Dechloromonas; s__	37	41	4	4	10	6	8	22
OTU_77	k__Bacteria; p__Gemmatimonadota; c__Gemmatimonadetes; o__Gemmatimonadales; f__Gemmatimonadaceae; g__Gemmatimonas; s__	8	19	150	5	7	18	1051	75
OTU_775	k__Bacteria; p__Proteobacteria; c__Gammaproteobacteria; o__EV818SWSAP88; f__EV818SWSAP88; g__EV818SWSAP88; s__	3	1	1	2	1	1	3	24
OTU_78	k__Bacteria; p__Firmicutes; c__Bacilli; o__Lactobacillales; f__Streptococcaceae; g__Streptococcus; s__Streptococcus_salivarius	25	3	77	1791	46	41	1	37
OTU_79	k__Bacteria; p__Proteobacteria; c__Alphaproteobacteria; o__Rhizobiales; f__Pleomorphomonadaceae; g__Pleomorphomonas; s__	10	1	2	84	2	24	79	821
OTU_796	k__Bacteria; p__Proteobacteria; c__Alphaproteobacteria; o__Acetobacterales; f__Acetobacteraceae; g__Roseomonas	2	10	27	13	11	34	17	23
OTU_80	k__Bacteria; p__Bacteroidota; c__Bacteroidia; o__Flavobacteriales; f__Weeksellaceae; g__Chryseobacterium	115	1392	4	1	78	2	62	10
OTU_81	k__Bacteria; p__Proteobacteria; c__Alphaproteobacteria; o__Acetobacterales; f__Acetobacteraceae; g__; s__	58	246	108	2	93	13	509	277
OTU_82	k__Bacteria; p__Proteobacteria; c__Alphaproteobacteria; o__Rhizobiales; f__Beijerinckiaceae; g__Methylobacterium-Methylorubrum	8	9	23	939	5	14	70	21
OTU_829	k__Bacteria; p__Proteobacteria; c__Gammaproteobacteria; o__Burkholderiales; f__Oxalobacteraceae; g__Undibacterium; s__	19	3	4	1	1	1	12	3
OTU_832	k__Bacteria; p__Firmicutes; c__Bacilli; o__Staphylococcales; f__Staphylococcaceae; g__Staphylococcus	10	4	17	36	10	6	1	7
OTU_836	k__Bacteria; p__Actinobacteriota; c__Actinobacteria; o__Micrococcales; f__Microbacteriaceae; g__Microbacterium	18	11	14	9	8	9	5	8
OTU_837	k__Bacteria; p__Proteobacteria; c__Gammaproteobacteria; o__Burkholderiales; f__Comamonadaceae	119	20	18	4	1	4	169	64
OTU_838	k__Bacteria; p__Proteobacteria; c__Alphaproteobacteria; o__Sphingomonadales; f__Sphingomonadaceae; g__MN_122.2a; s__	2	5	4	41	3	4	1	11
OTU_850	k__Bacteria; p__Proteobacteria; c__Gammaproteobacteria; o__Burkholderiales; f__Burkholderiaceae; g__Ralstonia; s__Ralstonia_insidiosa	10	4	6	5	2	9	1	2
OTU_86	k__Bacteria; p__Proteobacteria; c__Alphaproteobacteria; o__Azospirillales; f__Azospirillaceae; g__Azospirillum	40	124	2	72	2	59	56	529
OTU_88	k__Bacteria; p__Proteobacteria; c__Alphaproteobacteria; o__Rhizobiales; f__Xanthobacteraceae; g__Bradyrhizobium; s__Bradyrhizobium_sp.	22	9	392	11	12	72	1267	266
OTU_886	k__Bacteria; p__Actinobacteriota; c__Actinobacteria; o__Frankiales; f__Sporichthyaceae; g__Sporichthya; s__	4	1	7	1	2	1	18	12
OTU_896	k__Bacteria; p__Actinobacteriota; c__Thermoleophilia; o__Solirubrobacterales	15	3	62	2	1	4	220	18
OTU_9	k__Bacteria; p__Proteobacteria; c__Gammaproteobacteria; o__Burkholderiales; f__Comamonadaceae	7946	10128	6	12	772	428	31	38
OTU_90	k__Bacteria; p__Proteobacteria; c__Alphaproteobacteria; o__Caulobacterales; f__Hyphomonadaceae; g__Hirschia; s__	17	21	171	24	3	43	770	340
OTU_909	k__Bacteria; p__Proteobacteria; c__Gammaproteobacteria; o__Burkholderiales; f__Comamonadaceae	7	9	5	2	8	5	32	53
OTU_921	k__Bacteria; p__Proteobacteria; c__Gammaproteobacteria; o__Burkholderiales; f__Comamonadaceae	16	10	1	1	13	1	11	28
OTU_925	k__Bacteria; p__Actinobacteriota; c__Actinobacteria; o__Kineosporiales; f__Kineosporiaceae	22	8	3	4	2	2	6	20
OTU_929	k__Bacteria; p__Actinobacteriota; c__Actinobacteria; o__Micrococcales; f__Intrasporangiaceae	3	3	5	2	3	3	4	6
OTU_936	k__Bacteria; p__Proteobacteria; c__Alphaproteobacteria; o__Rhodobacterales; f__Rhodobacteraceae	66	138	72	59	38	124	68	700
OTU_94	k__Bacteria; p__Proteobacteria; c__Alphaproteobacteria; o__Acetobacterales; f__Acetobacteraceae	26	30	30	22	11	25	69	581
OTU_958	k__Bacteria; p__Actinobacteriota; c__Acidimicrobiia; o__Microtrichales; f__Iamiaceae; g__Iamia; s__	2	2	4	2	1	6	3	11
OTU_99	k__Bacteria; p__Proteobacteria; c__Alphaproteobacteria; o__Rhizobiales	21	21	64	21	7	24	364	450

## Sheet: AeyF.uniq.otu
Table S4. List of common and unique OTUs in each sample category. (k;Kingdom, p;Phylum, c;Class, o;Order, f;Family, g;genus, species;s)
#OTU_number	Taxonomy	Mean sequence count of unique OTU of AeyF group
OTU_1810	k__Bacteria	5
OTU_1953	k__Bacteria; p__Actinobacteriota; c__Actinobacteria; o__Propionibacteriales; f__Propionibacteriaceae; g__Luteococcus; s__	5
OTU_2047	k__Bacteria	4
OTU_2179	Unknown	2
OTU_2211	k__Bacteria; p__Firmicutes; c__Clostridia; o__Clostridia_vadinBB60_group; f__Clostridia_vadinBB60_group; g__Clostridia_vadinBB60_group; s__	3
OTU_2484	k__Bacteria; p__Firmicutes; c__Bacilli; o__Erysipelotrichales; f__Erysipelatoclostridiaceae	4
OTU_2485	k__Bacteria; p__Proteobacteria; c__Alphaproteobacteria; o__Rhodospirillales; f__; g__; s__	2
OTU_2510	Unknown	2
OTU_2722	Unknown	1
OTU_2760	k__Bacteria; p__Acidobacteriota; c__Acidobacteriae; o__Acidobacteriales; f__Acidobacteriaceae_(Subgroup_1); g__Edaphobacter; s__	3
OTU_2784	k__Bacteria; p__Chloroflexi; c__JG30-KF-CM66; o__JG30-KF-CM66; f__JG30-KF-CM66; g__JG30-KF-CM66; s__	3
OTU_2787	k__Bacteria	3
OTU_2842	Unknown	2
OTU_2854	k__Bacteria	1
OTU_2887	k__Bacteria	2
OTU_2893	k__Bacteria; p__Firmicutes; c__Clostridia; o__Clostridiales; f__Clostridiaceae; g__Clostridium_sensu_stricto_1; s__	2
OTU_2904	k__Bacteria; p__Proteobacteria; c__Gammaproteobacteria; o__Burkholderiales; f__Burkholderiaceae; g__Limnobacter; s__	2
OTU_2912	k__Bacteria; p__Bacteroidota; c__Bacteroidia; o__Bacteroidales; f__Bacteroidetes_vadinHA17; g__Bacteroidetes_vadinHA17; s__	2
OTU_2993	Unknown	2
OTU_3012	k__Bacteria	3
OTU_3018	k__Bacteria	2
OTU_3068	k__Bacteria; p__Bdellovibrionota; c__Bdellovibrionia; o__Bdellovibrionales; f__Bdellovibrionaceae; g__OM27_clade; s__	3
OTU_3071	k__Bacteria	2
OTU_3139	k__Bacteria; p__Proteobacteria; c__Alphaproteobacteria; o__Rickettsiales	2
OTU_3146	k__Bacteria; p__Planctomycetota; c__Planctomycetes; o__Isosphaerales; f__Isosphaeraceae; g__; s__	2
OTU_3154	k__Bacteria; p__Firmicutes; c__Clostridia; o__Oscillospirales; f__Oscillospiraceae; g__; s__	3
OTU_3174	k__Bacteria	2
OTU_3213	Unknown	2
OTU_3225	k__Bacteria; p__Acidobacteriota; c__Blastocatellia; o__11-24; f__11-24; g__11-24; s__	1
OTU_3237	Unknown	2
OTU_3267	Unknown	1
OTU_3293	k__Bacteria	1
OTU_3311	Unknown	1
OTU_3410	k__Bacteria; p__Myxococcota; c__Polyangia; o__MidBa8; f__MidBa8; g__MidBa8; s__	1
OTU_3421	Unknown	1
OTU_3447	k__Bacteria	2
OTU_3501	k__Bacteria; p__Desulfobacterota; c__; o__; f__; g__	1
OTU_3507	k__Bacteria	1
OTU_3512	k__Bacteria; p__Firmicutes; c__Bacilli; o__Lactobacillales; f__Lactobacillaceae; g__Lactobacillus; s__Lactobacillus_farciminis	2
OTU_3517	Unknown	1
OTU_3550	Unknown	1
OTU_3571	Unknown	1
OTU_3605	Unknown	1
OTU_3608	k__Bacteria; p__Firmicutes; c__Bacilli; o__Erysipelotrichales; f__Erysipelotrichaceae; g__Clostridium_innocuum_group	2
OTU_3612	Unknown	1
OTU_3621	Unknown	1
OTU_3672	k__Bacteria; p__Proteobacteria; c__Gammaproteobacteria; o__Enterobacterales; f__Enterobacteriaceae	2
OTU_3675	Unknown	1
OTU_3676	Unknown	1
OTU_3679	Unknown	1
OTU_3704	Unknown	1
OTU_3741	Unknown	1
OTU_3759	Unknown	1
OTU_3784	k__Bacteria; p__Planctomycetota; c__Planctomycetes; o__Isosphaerales; f__Isosphaeraceae	2
OTU_3795	k__Bacteria; p__Actinobacteriota	2
OTU_3821	k__Bacteria	1
OTU_3873	k__Bacteria	2
OTU_3888	Unknown	2
OTU_3927	k__Bacteria	1
OTU_3936	Unknown	1
OTU_3949	Unknown	2
OTU_3953	k__Bacteria; p__Firmicutes; c__Bacilli; o__Paenibacillales; f__Paenibacillaceae; g__Cohnella	2
OTU_3967	Unknown	1
OTU_3968	k__Bacteria	2
OTU_3970	Unknown	1
OTU_3985	Unknown	1
OTU_3999	k__Bacteria; p__Actinobacteriota; c__Acidimicrobiia; o__Microtrichales; f__; g__; s__	1
OTU_4018	Unknown	2
OTU_4037	k__Bacteria	1
OTU_4043	Unknown	1
OTU_4044	Unknown	1
OTU_4092	Unknown	1
OTU_4114	k__Bacteria	1
OTU_4174	k__Bacteria; p__Proteobacteria; c__Gammaproteobacteria; o__Nitrosococcales; f__Nitrosococcaceae; g__CI75cm.2.12; s__	2
OTU_4175	Unknown	2
OTU_4199	k__Bacteria	2
OTU_4202	Unknown	2
OTU_4209	k__Bacteria; p__Bacteroidota; c__Bacteroidia; o__Flavobacteriales; f__Flavobacteriaceae; g__Flavobacterium	1
OTU_4221	Unknown	1
OTU_4229	k__Bacteria; p__Verrucomicrobiota; c__Verrucomicrobiae; o__Pedosphaerales; f__Pedosphaeraceae; g__Pedosphaeraceae; s__	2
OTU_4234	Unknown	1
OTU_4249	k__Bacteria; p__Firmicutes; c__Clostridia; o__Christensenellales; f__Christensenellaceae; g__Christensenellaceae_R-7_group	1
OTU_4252	Unknown	1
OTU_4273	Unknown	2
OTU_4291	k__Bacteria	1
OTU_4294	Unknown	1
OTU_4374	k__Bacteria; p__Firmicutes; c__Clostridia; o__Oscillospirales; f__Butyricicoccaceae; g__UCG-009	1
OTU_4383	Unknown	1
OTU_4386	Unknown	1
OTU_4389	Unknown	1
OTU_4397	k__Bacteria; p__Firmicutes; c__Clostridia; o__Oscillospirales; f__UCG-010; g__UCG-010; s__	1
OTU_4404	Unknown	1
OTU_4441	k__Bacteria; p__Chloroflexi; c__Anaerolineae; o__Anaerolineales; f__Anaerolineaceae; g__; s__	1
OTU_4446	k__Bacteria; p__Proteobacteria; c__Gammaproteobacteria; o__Diplorickettsiales; f__Diplorickettsiaceae; g__Aquicella; s__	2
OTU_4466	k__Bacteria	1
OTU_4467	Unknown	1
OTU_4473	Unknown	1
OTU_4476	Unknown	1
OTU_4479	k__Bacteria; p__Patescibacteria; c__Microgenomatia; o__Candidatus_Daviesbacteria; f__Candidatus_Daviesbacteria; g__Candidatus_Daviesbacteria; s__	2
OTU_4480	Unknown	1
OTU_4491	Unknown	1
OTU_4500	Unknown	1
OTU_4504	Unknown	1
OTU_4525	k__Bacteria	1
OTU_4547	Unknown	1
OTU_4550	k__Bacteria; p__Proteobacteria; c__Gammaproteobacteria; o__Burkholderiales; f__Gallionellaceae; g__Sideroxydans; s__	2
OTU_4552	Unknown	1
OTU_4562	Unknown	1
OTU_4566	Unknown	1
OTU_4568	Unknown	1
OTU_4574	Unknown	1
OTU_4575	Unknown	1
OTU_4586	k__Bacteria; p__Acidobacteriota; c__Subgroup_25; o__Subgroup_25; f__Subgroup_25; g__Subgroup_25; s__	1
OTU_4602	Unknown	1
OTU_4608	Unknown	1
OTU_4613	k__Bacteria	1
OTU_4620	Unknown	1
OTU_4624	k__Bacteria	1
OTU_4629	Unknown	1
OTU_4661	Unknown	1
OTU_4662	Unknown	1
OTU_4678	k__Bacteria; p__Bacteroidota; c__Bacteroidia; o__Chitinophagales; f__Chitinophagaceae	2
OTU_4699	Unknown	1
OTU_4703	Unknown	1
OTU_4707	Unknown	1
OTU_4731	Unknown	1
OTU_4749	k__Bacteria; p__Firmicutes; c__Negativicutes; o__Veillonellales-Selenomonadales; f__Selenomonadaceae; g__Quinella; s__	1
OTU_4762	Unknown	1
OTU_4763	Unknown	1
OTU_4774	Unknown	1
OTU_4776	Unknown	1
OTU_4777	Unknown	1
OTU_4797	Unknown	1
OTU_4803	Unknown	2
OTU_4814	Unknown	1
OTU_4816	Unknown	1
OTU_4818	Unknown	1
OTU_4819	Unknown	1
OTU_4821	Unknown	1
OTU_4832	Unknown	1
OTU_4834	Unknown	1
OTU_4854	k__Bacteria; p__Desulfobacterota; c__Desulfuromonadia; o__Geobacterales; f__Geobacteraceae; g__Geobacter; s__	2
OTU_4868	Unknown	1
OTU_4870	Unknown	1
OTU_4878	Unknown	1
OTU_4879	Unknown	1
OTU_4880	Unknown	1
OTU_4881	Unknown	1
OTU_4882	Unknown	1
OTU_4890	Unknown	1
OTU_4891	Unknown	1
OTU_4892	Unknown	1
OTU_4895	Unknown	1
OTU_4908	k__Bacteria	1
OTU_4910	Unknown	1
OTU_4939	k__Bacteria; p__Firmicutes; c__Thermovenabulia; o__Thermovenabulales; f__Thermovenabulales; g__Tepidanaerobacter; s__	1
OTU_4968	Unknown	1
OTU_4971	Unknown	1
OTU_4974	Unknown	1
OTU_4980	Unknown	1
OTU_4985	Unknown	1
OTU_4991	Unknown	1
OTU_4999	Unknown	1
OTU_5000	Unknown	1
OTU_5002	Unknown	1
OTU_5032	k__Bacteria; p__Methylomirabilota; c__Methylomirabilia; o__Rokubacteriales; f__Rokubacteriales; g__Rokubacteriales; s__	1
OTU_5034	k__Bacteria; p__Caldatribacteriota; c__JS1; o__JS1; f__JS1; g__JS1; s__	1
OTU_5054	Unknown	1
OTU_5060	Unknown	1
OTU_5070	Unknown	1
OTU_5072	Unknown	1
OTU_5075	Unknown	1
OTU_5094	Unknown	1
OTU_5095	Unknown	1
OTU_5104	Unknown	1
OTU_5105	Unknown	1
OTU_5107	k__Bacteria	1
OTU_5110	k__Bacteria; p__Proteobacteria; c__Gammaproteobacteria; o__Xanthomonadales; f__Rhodanobacteraceae	1
OTU_5134	Unknown	1
OTU_5170	Unknown	1
OTU_5171	Unknown	1
OTU_5183	Unknown	1
OTU_5201	k__Bacteria; p__Desulfobacterota; c__Desulfuromonadia; o__Geobacterales; f__Geobacteraceae	1
OTU_5213	Unknown	1
OTU_5216	k__Bacteria	1
OTU_5231	Unknown	1
OTU_5239	Unknown	1
OTU_5242	Unknown	1
OTU_5244	Unknown	1
OTU_5245	Unknown	1
OTU_5267	Unknown	1
OTU_5281	k__Bacteria	1
OTU_5290	Unknown	1
OTU_5295	Unknown	1
OTU_5297	Unknown	1
OTU_5298	Unknown	1
OTU_5301	Unknown	1
OTU_5304	Unknown	1
OTU_5307	Unknown	1
OTU_5319	Unknown	1
OTU_5329	Unknown	1
OTU_5330	Unknown	1
OTU_5333	Unknown	1
OTU_5334	Unknown	1
OTU_5335	Unknown	1
OTU_5343	Unknown	1
OTU_5349	Unknown	1
OTU_5394	Unknown	1
OTU_5399	Unknown	1
OTU_5409	k__Bacteria; p__Firmicutes; c__Clostridia; o__Oscillospirales; f__UCG-010; g__UCG-010; s__	1
OTU_5426	Unknown	1
OTU_5444	k__Bacteria; p__Proteobacteria; c__Gammaproteobacteria; o__Burkholderiales; f__Sutterellaceae; g__Parasutterella; s__Parasutterella_excrementihominis	1
OTU_5445	Unknown	1
OTU_5459	Unknown	1
OTU_5473	Unknown	1
OTU_5479	Unknown	1
OTU_5481	Unknown	1
OTU_5483	Unknown	1
OTU_5491	Unknown	1
OTU_5492	Unknown	1
OTU_5499	Unknown	1
OTU_5500	Unknown	1
OTU_5523	Unknown	1
OTU_5529	k__Bacteria	1
OTU_5536	k__Bacteria	1
OTU_5537	k__Bacteria; p__Bacteroidota; c__Bacteroidia; o__Bacteroidales; f__Paludibacteraceae; g__; s__	1
OTU_5542	k__Bacteria; p__Actinobacteriota; c__Actinobacteria; o__Actinomycetales; f__Actinomycetaceae; g__Actinomyces	1
OTU_5563	k__Bacteria; p__Firmicutes; c__Clostridia; o__Clostridia_vadinBB60_group; f__Clostridia_vadinBB60_group; g__Clostridia_vadinBB60_group; s__	1
OTU_5565	Unknown	1
OTU_5577	Unknown	1
OTU_5599	Unknown	1
OTU_5625	k__Bacteria; p__Chloroflexi; c__Chloroflexia; o__Chloroflexales; f__Roseiflexaceae; g__; s__	2
OTU_5629	k__Bacteria; p__Bdellovibrionota; c__Oligoflexia; o__Oligoflexales; f__; g__; s__	1
OTU_5642	Unknown	1
OTU_5658	k__Bacteria; p__Thermotogota; c__Thermotogae; o__Kosmotogales; f__Kosmotogaceae; g__Mesotoga; s__
OTU_5660	k__Bacteria	1
OTU_5671	k__Bacteria; p__Firmicutes; c__Clostridia	1
OTU_5699	Unknown	1
OTU_5714	Unknown	1
OTU_5718	k__Bacteria	1
OTU_5729	Unknown	1
OTU_5733	Unknown	1
OTU_5735	Unknown	1
OTU_5739	Unknown	1
OTU_5748	Unknown	1
OTU_5778	Unknown	1
OTU_5779	Unknown	1
OTU_5811	k__Bacteria; p__Firmicutes; c__Bacilli; o__Acholeplasmatales; f__Acholeplasmataceae; g__Acholeplasma; s__Acholeplasma_sp.	1
OTU_5815	Unknown	1
OTU_5826	Unknown	1
OTU_5831	Unknown	1
OTU_5833	k__Bacteria	1
OTU_5836	Unknown	1
OTU_5842	Unknown	1
OTU_5843	k__Bacteria; p__Spirochaetota; c__MVP-15; o__MVP-15; f__MVP-15; g__MVP-15	1
OTU_5844	Unknown	1
OTU_5846	Unknown	1
OTU_5853	Unknown	1
OTU_5854	Unknown	1
OTU_5859	Unknown	1
OTU_5861	Unknown	1
OTU_5869	Unknown	1
OTU_5872	Unknown	1
OTU_5914	Unknown	1
OTU_5918	Unknown	1
OTU_5921	Unknown	1
OTU_5928	Unknown	1
OTU_5932	Unknown	1
OTU_5935	Unknown	1
OTU_5950	Unknown	1
OTU_5952	Unknown	1
OTU_5953	Unknown	1
OTU_5963	Unknown	1
OTU_5968	Unknown	1
OTU_5996	k__Bacteria	1
OTU_6023	Unknown	1
OTU_6043	k__Bacteria	1
OTU_6049	Unknown	1
OTU_6065	Unknown	1
OTU_6074	Unknown	1
OTU_6110	Unknown	1
OTU_6112	Unknown	1
OTU_6144	Unknown	1
OTU_6147	Unknown	1
OTU_6150	Unknown	1
OTU_6175	k__Bacteria; p__Bacteroidota; c__Bacteroidia; o__Sphingobacteriales; f__Sphingobacteriaceae; g__Mucilaginibacter; s__	1
OTU_6176	k__Bacteria	1
OTU_6177	k__Bacteria; p__Proteobacteria; c__Alphaproteobacteria; o__Paracaedibacterales; f__Paracaedibacteraceae	1
OTU_6185	k__Bacteria; p__Proteobacteria; c__Gammaproteobacteria; o__UBA10353_marine_group; f__UBA10353_marine_group; g__UBA10353_marine_group; s__	1
OTU_6205	k__Bacteria	1
OTU_6213	Unknown	1
OTU_6215	Unknown	1
OTU_6231	Unknown	1
OTU_6232	Unknown	1
OTU_6235	Unknown	1
OTU_6272	Unknown	1
OTU_6282	k__Bacteria; p__Verrucomicrobiota; c__Chlamydiae; o__Chlamydiales; f__Parachlamydiaceae; g__Candidatus_Protochlamydia; s__	1
OTU_6304	Unknown	1
OTU_6305	Unknown	1
OTU_6308	Unknown	1
OTU_6317	Unknown	1
OTU_6326	Unknown	1
OTU_6327	k__Bacteria; p__Proteobacteria; c__Alphaproteobacteria; o__Rickettsiales; f__Mitochondria; g__Mitochondria	1
OTU_6334	Unknown	1
OTU_6340	Unknown	1
OTU_6347	Unknown	1
OTU_6351	Unknown	1
OTU_6352	Unknown	1
OTU_6367	Unknown	1
OTU_6369	Unknown	1
OTU_6381	k__Bacteria; p__Acidobacteriota; c__Acidobacteriae; o__Acidobacteriales; f__; g__; s__	1
OTU_6382	k__Bacteria; p__Proteobacteria; c__Alphaproteobacteria; o__Elsterales; f__; g__; s__	1
OTU_6407	k__Bacteria	1
OTU_6409	k__Bacteria	1
OTU_6411	Unknown	1
OTU_6437	Unknown	1
OTU_6449	Unknown	1
OTU_6456	Unknown	1
OTU_6459	Unknown	1
OTU_6469	Unknown	1
OTU_6474	Unknown	1
OTU_6481	k__Bacteria	1
OTU_6507	Unknown	1
OTU_6515	Unknown	1
OTU_6525	Unknown	1
OTU_6526	k__Bacteria; p__Bacteroidota; c__Bacteroidia; o__Cytophagales; f__Hymenobacteraceae; g__Pontibacter; s__Pontibacter_populi	1
OTU_6539	Unknown	1
OTU_6540	Unknown	1
OTU_6543	Unknown	1
OTU_6545	k__Bacteria	1
OTU_6546	Unknown	1
OTU_6547	Unknown	1
OTU_6557	Unknown	1
OTU_6562	Unknown	1
OTU_6582	Unknown	1
OTU_6586	k__Bacteria	1
OTU_6601	Unknown	1
OTU_6611	k__Bacteria; p__Verrucomicrobiota; c__Verrucomicrobiae; o__Pedosphaerales; f__Pedosphaeraceae	1
OTU_6613	k__Bacteria; p__Gemmatimonadota; c__Gemmatimonadetes; o__Gemmatimonadales; f__Gemmatimonadaceae; g__; s__	1
OTU_6619	Unknown	1
OTU_6645	k__Bacteria	1
OTU_6650	Unknown	1
OTU_6695	k__Bacteria; p__Proteobacteria; c__Gammaproteobacteria	2
OTU_6696	k__Bacteria; p__Proteobacteria; c__Gammaproteobacteria; o__Enterobacterales	1
OTU_6710	Unknown	1
OTU_6712	Unknown	1
OTU_6722	Unknown	1
OTU_6723	Unknown	1
OTU_6741	k__Bacteria	2
OTU_6750	Unknown	1
OTU_6761	Unknown	1
OTU_6764	Unknown	1
OTU_6774	Unknown	1
OTU_6787	Unknown	1
OTU_6793	Unknown	1
OTU_6804	Unknown	1
OTU_6809	Unknown	1
OTU_6810	Unknown	1
OTU_6813	Unknown	1
OTU_6815	Unknown	1
OTU_6826	Unknown	1
OTU_6837	k__Bacteria; p__Proteobacteria; c__Gammaproteobacteria	1
OTU_6850	Unknown	2
OTU_6858	Unknown	1
OTU_6860	Unknown	1
OTU_6865	Unknown	1
OTU_6894	Unknown	1
OTU_6896	Unknown	1
OTU_6910	k__Bacteria; p__Firmicutes; c__Clostridia; o__Christensenellales; f__Christensenellaceae; g__Christensenellaceae_R-7_group; s__	1
OTU_6928	k__Bacteria; p__Firmicutes; c__Clostridia; o__Peptostreptococcales-Tissierellales; f__Peptostreptococcaceae; g__Peptostreptococcaceae; s__	1
OTU_6929	k__Bacteria; p__Nitrospirota; c__Thermodesulfovibrionia; o__; f__; g__; s__	2
OTU_6948	Unknown	1
OTU_6950	Unknown	1
OTU_6961	Unknown	1
OTU_6963	Unknown	1
OTU_6969	Unknown	1
OTU_6974	Unknown	1
OTU_6988	Unknown	1
OTU_6989	Unknown	1
OTU_6997	Unknown	1
OTU_7005	Unknown	1
OTU_7020	Unknown	1
OTU_7021	Unknown	1
OTU_7029	Unknown	1
OTU_7052	k__Bacteria; p__Actinobacteriota; c__Actinobacteria; o__Propionibacteriales; f__Nocardioidaceae	1
OTU_7056	Unknown	1
OTU_7064	Unknown	1
OTU_7068	Unknown	1
OTU_7073	Unknown	1
OTU_7083	k__Bacteria; p__Myxococcota; c__Polyangia; o__Polyangiales; f__Sandaracinaceae; g__Sandaracinus; s__	1
OTU_7108	Unknown	1
OTU_7122	Unknown	1
OTU_7127	Unknown	2
OTU_7140	Unknown	1
OTU_7141	k__Bacteria	1
OTU_7149	Unknown	1
OTU_7162	k__Bacteria; p__Firmicutes; c__Clostridia; o__Christensenellales; f__Christensenellaceae; g__Christensenellaceae_R-7_group; s__iron-reducing_bacterium	1
OTU_7166	Unknown	1
OTU_7182	k__Bacteria; p__Bacteroidota; c__Bacteroidia; o__Bacteroidales; f__Prevotellaceae; g__Prevotellaceae_NK3B31_group; s__	1
OTU_7225	k__Bacteria	1
OTU_7228	Unknown	1
OTU_7239	Unknown	1
OTU_7245	Unknown	1
OTU_7248	Unknown	1
OTU_7276	Unknown	1
OTU_7277	Unknown	1
OTU_7280	Unknown	1
OTU_7284	Unknown	1
OTU_7288	Unknown	1
OTU_7300	Unknown	1
OTU_7323	Unknown	1
OTU_7333	k__Bacteria; p__Proteobacteria; c__Gammaproteobacteria; o__Burkholderiales; f__Comamonadaceae	1
OTU_7372	k__Bacteria; p__Firmicutes	1
OTU_7373	k__Bacteria; p__Firmicutes; c__Clostridia; o__Peptococcales; f__Peptococcaceae; g__; s__	2
OTU_7392	k__Bacteria; p__Chloroflexi; c__Chloroflexia; o__Kallotenuales; f__AKIW781; g__AKIW781; s__	1
OTU_7404	Unknown	1
OTU_7421	Unknown	1
OTU_7436	k__Bacteria; p__Myxococcota; c__Polyangia; o__Polyangiales; f__BIrii41; g__BIrii41; s__Sorangiineae_bacterium	1
OTU_7454	k__Bacteria	1
OTU_7462	k__Bacteria; p__Bacteroidota; c__Bacteroidia; o__Sphingobacteriales; f__Sphingobacteriaceae; g__Mucilaginibacter; s__Castanea_mollissima	2
OTU_7465	Unknown	1
OTU_7492	k__Bacteria; p__Firmicutes; c__Clostridia; o__Clostridia; f__Hungateiclostridiaceae	1
OTU_7505	Unknown	1
OTU_7513	Unknown	1
OTU_7516	k__Bacteria	1
OTU_7522	Unknown	1
OTU_7527	Unknown	1
OTU_7535	Unknown	1
OTU_7539	Unknown	1
OTU_7550	k__Bacteria; p__Firmicutes; c__Clostridia; o__Christensenellales; f__Christensenellaceae	1
OTU_7552	k__Bacteria	1
OTU_7556	Unknown	1
OTU_7559	Unknown	1
OTU_7560	k__Bacteria	1
OTU_7564	Unknown	1
OTU_7578	Unknown	1
OTU_7581	Unknown	1
OTU_7584	k__Bacteria	1
OTU_7589	Unknown	1

## Sheet: AeyL.uniq.otu
Table S4. List of common and unique OTUs in each sample category. (k;Kingdom, p;Phylum, c;Class, o;Order, f;Family, g;genus, species;s)
#OTU_number	Taxonomy	Mean sequence count of unique OTU of AeyL group
OTU_1045	Unknown	42
OTU_1276	k__Bacteria	21
OTU_1746	k__Bacteria; p__Verrucomicrobiota; c__Verrucomicrobiae; o__Verrucomicrobiales; f__Verrucomicrobiaceae	1
OTU_1789	k__Bacteria	6
OTU_1792	k__Bacteria	8
OTU_1801	k__Bacteria	4
OTU_1851	k__Bacteria; p__Bacteroidota; c__Bacteroidia; o__Chitinophagales; f__Chitinophagaceae; g__Dinghuibacter; s__	1
OTU_1939	Unknown	6
OTU_2029	k__Bacteria	7
OTU_2031	k__Bacteria	5
OTU_2282	k__Bacteria	6
OTU_2308	Unknown	3
OTU_2327	k__Bacteria; p__Proteobacteria; c__Gammaproteobacteria; o__Gammaproteobacteria_Incertae_Sedis; f__Unknown_Family; g__Unknown_Family; s__	2
OTU_2413	Unknown	4
OTU_2516	k__Bacteria	5
OTU_2521	Unknown	3
OTU_2573	k__Bacteria	4
OTU_2698	Unknown	2
OTU_2700	Unknown	2
OTU_2728	Unknown	2
OTU_2736	k__Bacteria	4
OTU_2761	Unknown	7
OTU_2797	Unknown	3
OTU_2828	k__Bacteria; p__Proteobacteria; c__Alphaproteobacteria; o__Acetobacterales; f__Acetobacteraceae	2
OTU_2874	k__Bacteria; p__Bacteroidota; c__Bacteroidia; o__Sphingobacteriales; f__NS11-12_marine_group; g__NS11-12_marine_group; s__Bacteroidetes_bacterium	2
OTU_2932	k__Bacteria; p__Bacteroidota; c__Bacteroidia; o__Bacteroidales; f__Muribaculaceae; g__Muribaculaceae; s__	2
OTU_2954	Unknown	2
OTU_3003	Unknown	2
OTU_3062	Unknown	2
OTU_3085	k__Bacteria; p__Bacteroidota; c__Bacteroidia; o__Sphingobacteriales	3
OTU_3153	k__Bacteria; p__Firmicutes; c__Clostridia	2
OTU_3353	k__Bacteria; p__Proteobacteria; c__Gammaproteobacteria; o__Diplorickettsiales; f__Diplorickettsiaceae; g__	1
OTU_3433	Unknown	3
OTU_3438	k__Bacteria	2
OTU_3525	Unknown	2
OTU_3555	k__Bacteria; p__Firmicutes; c__Clostridia; o__Oscillospirales	1
OTU_3562	k__Bacteria	3
OTU_3578	k__Bacteria	3
OTU_3580	Unknown	2
OTU_3712	Unknown	2
OTU_3748	k__Bacteria	1
OTU_3756	k__Bacteria; p__Firmicutes; c__Clostridia; o__Oscillospirales; f__Ruminococcaceae	1
OTU_3786	Unknown	1
OTU_3808	k__Bacteria; p__Proteobacteria; c__Alphaproteobacteria; o__Rhizobiales; f__Beijerinckiaceae	1
OTU_3832	Unknown	1
OTU_3860	k__Bacteria; p__Patescibacteria; c__Saccharimonadia; o__Saccharimonadales; f__Saccharimonadales; g__Saccharimonadales; s__	1
OTU_3939	Unknown	2
OTU_3951	k__Bacteria	2
OTU_4019	Unknown	1
OTU_4028	k__Bacteria	3
OTU_4109	Unknown	1
OTU_4112	k__Bacteria	1
OTU_4145	k__Bacteria	2
OTU_4148	Unknown	1
OTU_4151	Unknown	1
OTU_4170	k__Bacteria; p__Chloroflexi; c__Chloroflexia; o__Chloroflexales; f__Chloroflexaceae; g__Chloronema; s__	2
OTU_4178	k__Bacteria	1
OTU_4257	Unknown	1
OTU_4258	Unknown	1
OTU_4281	k__Bacteria; p__Firmicutes; c__Clostridia; o__Clostridia_vadinBB60_group; f__Clostridia_vadinBB60_group; g__Clostridia_vadinBB60_group; s__	2
OTU_4327	Unknown	1
OTU_4352	Unknown	1
OTU_4364	Unknown	1
OTU_4516	k__Bacteria; p__Actinobacteriota; c__Actinobacteria; o__FFCH16263; f__FFCH16263; g__FFCH16263; s__	1
OTU_4517	k__Bacteria	1
OTU_4563	Unknown	1
OTU_4573	k__Bacteria	1
OTU_4609	k__Bacteria; p__Proteobacteria; c__Gammaproteobacteria; o__Burkholderiales; f__Comamonadaceae	1
OTU_4622	Unknown	1
OTU_4683	k__Bacteria; p__Cyanobacteria; c__Cyanobacteriia; o__Synechococcales; f__Cyanobiaceae; g__Cyanobium_PCC-6307; s__Cyanobium_sp.	1
OTU_4723	k__Bacteria; p__Proteobacteria; c__Gammaproteobacteria; o__Burkholderiales; f__Chitinimonadaceae; g__Chitinivorax; s__	1
OTU_4727	k__Bacteria; p__Firmicutes; c__Clostridia; o__Oscillospirales; f__Oscillospiraceae	1
OTU_4737	k__Bacteria; p__Proteobacteria; c__Gammaproteobacteria; o__Oceanospirillales; f__Halomonadaceae; g__HdN1; s__gamma_proteobacterium	2
OTU_4755	k__Bacteria; p__Chloroflexi	1
OTU_4765	k__Bacteria	1
OTU_4768	Unknown	1
OTU_4780	k__Bacteria	1
OTU_4786	k__Bacteria	2
OTU_4798	k__Bacteria; p__Proteobacteria; c__Gammaproteobacteria; o__Burkholderiales; f__Rhodocyclaceae	1
OTU_4808	k__Bacteria; p__Cyanobacteria; c__Cyanobacteriia; o__Oxyphotobacteria_Incertae_Sedis; f__Unknown_Family	1
OTU_4826	k__Bacteria	1
OTU_4853	k__Bacteria	1
OTU_4905	k__Bacteria	1
OTU_4958	Unknown	2
OTU_5010	Unknown	1
OTU_5035	k__Bacteria; p__Verrucomicrobiota; c__Verrucomicrobiae; o__Verrucomicrobiales; f__Verrucomicrobiaceae; g__; s__	1
OTU_5085	k__Bacteria	3
OTU_5086	Unknown	1
OTU_5098	Unknown	1
OTU_5126	Unknown	1
OTU_5166	Unknown	1
OTU_5230	k__Bacteria	2
OTU_5240	Unknown	1
OTU_5249	k__Bacteria	1
OTU_5269	Unknown	1
OTU_5276	k__Bacteria; p__Verrucomicrobiota; c__Verrucomicrobiae; o__Pedosphaerales; f__Pedosphaeraceae; g__ADurb.Bin063-1; s__	1
OTU_5283	k__Bacteria; p__Firmicutes; c__Clostridia; o__Oscillospirales; f__Oscillospirales; g__Hydrogenoanaerobacterium; s__Selenomonadales_bacterium	1
OTU_5324	Unknown	1
OTU_5325	Unknown	1
OTU_5382	k__Bacteria; p__Proteobacteria; c__Gammaproteobacteria; o__Xanthomonadales; f__Xanthomonadaceae	1
OTU_5386	k__Bacteria; p__Bacteroidota; c__Bacteroidia; o__Bacteroidales; f__Muribaculaceae; g__Muribaculaceae; s__	1
OTU_5442	Unknown	1
OTU_5456	Unknown	1
OTU_5480	k__Bacteria	1
OTU_5517	Unknown	1
OTU_5543	k__Bacteria; p__Firmicutes; c__Clostridia; o__Peptostreptococcales-Tissierellales; f__Peptostreptococcales-Tissierellales; g__Guggenheimella; s__	1
OTU_5583	k__Bacteria	1
OTU_5596	k__Bacteria; p__Desulfobacterota; c__Syntrophobacteria; o__Syntrophobacterales; f__Syntrophobacteraceae; g__Desulfovirga; s__	1
OTU_5652	Unknown	1
OTU_5720	k__Bacteria; p__Proteobacteria; c__Alphaproteobacteria; o__Rickettsiales; f__Mitochondria; g__Mitochondria; s__	2
OTU_5725	k__Bacteria; p__Actinobacteriota; c__Actinobacteria; o__PeM15; f__PeM15; g__PeM15	2
OTU_5730	k__Bacteria; p__Firmicutes; c__Clostridia; o__; f__; g__; s__	1
OTU_5747	k__Bacteria	1
OTU_5766	k__Bacteria; p__Proteobacteria; c__Gammaproteobacteria; o__Burkholderiales; f__Hydrogenophilaceae; g__Hydrogenophilus; s__Hydrogenophilus_thermoluteolus	1
OTU_5772	Unknown	1
OTU_5786	k__Bacteria	1
OTU_5789	k__Bacteria; p__Armatimonadota; c__Fimbriimonadia; o__Fimbriimonadales; f__Fimbriimonadaceae; g__Fimbriimonadaceae; s__	1
OTU_5800	Unknown	1
OTU_5805	k__Bacteria; p__Bacteroidota; c__Bacteroidia; o__Chitinophagales; f__Saprospiraceae; g__; s__	1
OTU_5867	k__Bacteria	1
OTU_5873	k__Bacteria; p__Proteobacteria; c__Gammaproteobacteria; o__Burkholderiales; f__Comamonadaceae; g__Ideonella	1
OTU_5876	k__Bacteria; p__Bacteroidota; c__Bacteroidia; o__Flavobacteriales; f__Weeksellaceae; g__Bergeyella; s__	1
OTU_5897	Unknown	1
OTU_5924	k__Bacteria; p__Bacteroidota; c__Rhodothermia; o__Rhodothermales; f__Rhodothermaceae	1
OTU_5933	k__Bacteria	1
OTU_5941	k__Bacteria; p__Firmicutes; c__Clostridia; o__Christensenellales; f__Christensenellaceae; g__Christensenellaceae_R-7_group; s__	1
OTU_5946	Unknown	1
OTU_5951	Unknown	1
OTU_6021	Unknown	1
OTU_6031	Unknown	1
OTU_6069	Unknown	2
OTU_6097	k__Bacteria	2
OTU_6117	k__Bacteria; p__Chloroflexi; c__Anaerolineae; o__Anaerolineales; f__Anaerolineaceae; g__Anaerolinea	1
OTU_6152	k__Bacteria	2
OTU_6224	Unknown	1
OTU_6225	Unknown	1
OTU_6226	k__Bacteria	3
OTU_6230	Unknown	1
OTU_6298	k__Bacteria; p__Bacteroidota; c__Bacteroidia; o__Cytophagales; f__Microscillaceae	1
OTU_6323	k__Bacteria	2
OTU_6355	Unknown	2
OTU_6366	Unknown	2
OTU_6402	k__Bacteria; p__Firmicutes; c__Clostridia; o__Clostridia; f__Hungateiclostridiaceae	1
OTU_6478	Unknown	2
OTU_6495	Unknown	1
OTU_6496	Unknown	1
OTU_6502	k__Bacteria; p__Firmicutes; c__Clostridia; o__Christensenellales; f__Christensenellaceae	1
OTU_6538	k__Bacteria	1
OTU_6589	Unknown	3
OTU_6605	k__Bacteria	4
OTU_6612	k__Bacteria	1
OTU_6683	k__Bacteria; p__Chloroflexi; c__Ktedonobacteria; o__Ktedonobacterales; f__Ktedonobacteraceae	1
OTU_6737	k__Bacteria	1
OTU_6776	k__Bacteria	1
OTU_6812	Unknown	2
OTU_6842	k__Bacteria	1
OTU_6862	Unknown	1
OTU_6881	k__Bacteria	1
OTU_6911	k__Bacteria	2
OTU_6931	k__Bacteria; p__Actinobacteriota; c__Rubrobacteria; o__Rubrobacterales; f__Rubrobacteriaceae; g__Rubrobacter; s__	1
OTU_6933	Unknown	1
OTU_6954	Unknown	1
OTU_6971	k__Bacteria	1
OTU_7014	Unknown	2
OTU_7049	Unknown	1
OTU_7072	Unknown	2
OTU_7097	k__Bacteria; p__Armatimonadota; c__Fimbriimonadia; o__Fimbriimonadales; f__Fimbriimonadaceae; g__Fimbriimonadaceae; s__	2
OTU_7099	k__Bacteria; p__Patescibacteria; c__Saccharimonadia; o__Saccharimonadales; f__Saccharimonadales; g__Saccharimonadales; s__	1
OTU_7112	k__Bacteria	1
OTU_7117	Unknown	2
OTU_7270	k__Bacteria	3
OTU_7279	Unknown	1
OTU_7287	Unknown	1
OTU_7317	k__Bacteria	3
OTU_7368	k__Bacteria	1
OTU_7375	k__Bacteria; p__Firmicutes; c__Clostridia; o__Christensenellales; f__Christensenellaceae; g__; s__	1
OTU_7380	k__Bacteria; p__Proteobacteria; c__Gammaproteobacteria; o__Pasteurellales; f__Pasteurellaceae	1
OTU_7388	k__Bacteria	2
OTU_7393	k__Bacteria; p__Chloroflexi; c__Chloroflexia; o__Thermomicrobiales; f__JG30-KF-CM45; g__JG30-KF-CM45; s__	1
OTU_7423	k__Bacteria; p__Chloroflexi; c__Chloroflexia; o__Chloroflexales; f__Chloroflexaceae	2
OTU_7448	k__Bacteria	1
OTU_7470	k__Bacteria	1
OTU_7503	k__Bacteria; p__Deinococcota; c__Deinococci; o__Deinococcales; f__Trueperaceae; g__Truepera; s__	1
OTU_7510	Unknown	2
OTU_7515	Unknown	1
OTU_7521	Unknown	1
OTU_7598	Unknown	1

## Sheet: AeyM.uniq.otu
Table S4. List of common and unique OTUs in each sample category. (k;Kingdom, p;Phylum, c;Class, o;Order, f;Family, g;genus, species;s)
#OTU_number	Taxonomy	Mean sequence count of unique OTU of AeyM group
OTU_119	k__Bacteria	371
OTU_181	k__Bacteria; p__Firmicutes; c__Clostridia; o__Oscillospirales; f__Oscillospiraceae; g__Oscillibacter; s__Oscillibacter_ruminantium	312
OTU_200	k__Bacteria; p__Proteobacteria; c__Gammaproteobacteria; o__Burkholderiales; f__Sutterellaceae; g__Sutterella; s__	573
OTU_228	k__Bacteria; p__Proteobacteria; c__Gammaproteobacteria; o__Burkholderiales; f__Alcaligenaceae; g__Parapusillimonas	287
OTU_267	k__Bacteria; p__Firmicutes; c__Clostridia; o__Clostridiales; f__Clostridiaceae; g__Clostridium_sensu_stricto_2; s__	161
OTU_303	k__Bacteria; p__Proteobacteria; c__Gammaproteobacteria; o__Coxiellales; f__Coxiellaceae; g__Coxiella; s__Coxiella_endosymbiont	212
OTU_346	k__Bacteria; p__Firmicutes; c__Clostridia; o__Clostridiales; f__Clostridiaceae; g__Clostridium_sensu_stricto_12; s__Clostridium_kluyveri	125
OTU_354	k__Bacteria; p__Proteobacteria; c__Alphaproteobacteria; o__Rickettsiales; f__Mitochondria; g__Mitochondria; s__	105
OTU_419	k__Bacteria	79
OTU_513	k__Bacteria; p__Firmicutes; c__Clostridia; o__Oscillospirales; f__Ruminococcaceae; g__Caproiciproducens; s__	59
OTU_532	k__Bacteria; p__Marinimicrobia_(SAR406_clade); c__Marinimicrobia_(SAR406_clade); o__Marinimicrobia_(SAR406_clade); f__Marinimicrobia_(SAR406_clade); g__Marinimicrobia_(SAR406_clade)	74
OTU_537	k__Bacteria; p__Firmicutes; c__Negativicutes; o__Veillonellales-Selenomonadales; f__Veillonellaceae; g__Allisonella; s__	106
OTU_554	k__Bacteria; p__Bacteroidota; c__Bacteroidia; o__Bacteroidales; f__Muribaculaceae; g__Muribaculaceae; s__	63
OTU_560	k__Bacteria; p__Firmicutes; c__Clostridia; o__Oscillospirales; f__Ruminococcaceae; g__Caproiciproducens; s__Clostridium_sp.	65
OTU_574	k__Bacteria; p__Firmicutes; c__Clostridia; o__Oscillospirales; f__Oscillospiraceae; g__Intestinimonas	79
OTU_575	k__Bacteria	41
OTU_576	Unknown	38
OTU_592	Unknown	55
OTU_629	k__Bacteria; p__Firmicutes; c__Clostridia; o__Oscillospirales; f__Ruminococcaceae; g__Negativibacillus; s__	33
OTU_675	k__Bacteria; p__Proteobacteria; c__Gammaproteobacteria; o__Burkholderiales; f__Methylophilaceae; g__OM43_clade; s__	43
OTU_726	k__Bacteria; p__Bacteroidota; c__Bacteroidia; o__Bacteroidales; f__Rikenellaceae; g__Rikenellaceae_RC9_gut_group; s__	66
OTU_758	k__Bacteria; p__Deferribacterota; c__Deferribacteres; o__Deferribacterales; f__Deferribacteraceae; g__Mucispirillum; s__	39
OTU_806	k__Bacteria; p__Bacteroidota; c__Bacteroidia; o__Bacteroidales; f__Muribaculaceae; g__Muribaculaceae; s__	52
OTU_840	k__Bacteria; p__Bacteroidota; c__Bacteroidia; o__Bacteroidales; f__Marinifilaceae; g__Odoribacter; s__Odoribacter_sp.	29
OTU_851	k__Bacteria	18
OTU_870	k__Bacteria; p__Bacteroidota; c__Bacteroidia; o__Bacteroidales; f__Muribaculaceae; g__Muribaculaceae; s__	37
OTU_895	Unknown	15
OTU_932	k__Bacteria; p__Proteobacteria; c__Alphaproteobacteria; o__Rickettsiales; f__Anaplasmataceae; g__Anaplasma; s__Anaplasma_marginale	22
OTU_937	k__Bacteria; p__Bacteroidota; c__Bacteroidia; o__Bacteroidales; f__Prevotellaceae; g__Prevotellaceae_UCG-001; s__	22
OTU_948	k__Bacteria; p__Firmicutes; c__Clostridia; o__Clostridiales; f__Clostridiaceae; g__Clostridium_sensu_stricto_7; s__Clostridium_sp.	18
OTU_956	k__Bacteria; p__Firmicutes; c__Clostridia; o__Oscillospirales; f__Ruminococcaceae	20
OTU_1078	k__Bacteria	16
OTU_1105	k__Bacteria; p__Proteobacteria; c__Gammaproteobacteria; o__Burkholderiales; f__MWH-UniP1_aquatic_group; g__MWH-UniP1_aquatic_group; s__	15
OTU_1129	k__Bacteria; p__Firmicutes; c__Bacilli; o__Bacillales; f__Planococcaceae; g__Savagea; s__	14
OTU_1157	Unknown	5
OTU_1160	k__Bacteria; p__Firmicutes; c__Clostridia; o__Oscillospirales; f__Ruminococcaceae; g__Pygmaiobacter; s__Pygmaiobacter_massiliensis	13
OTU_1169	k__Bacteria; p__Firmicutes; c__Clostridia; o__Lachnospirales; f__Lachnospiraceae	15
OTU_1183	Unknown	12
OTU_1191	Unknown	1
OTU_1200	Unknown	16
OTU_1207	k__Bacteria; p__Bacteroidota; c__Bacteroidia; o__Bacteroidales; f__Muribaculaceae; g__Muribaculaceae; s__	28
OTU_1215	k__Bacteria	19
OTU_1239	k__Bacteria; p__Firmicutes; c__Negativicutes; o__Veillonellales-Selenomonadales; f__; g__	25
OTU_1240	k__Bacteria; p__Verrucomicrobiota; c__Omnitrophia; o__Omnitrophales	13
OTU_1246	k__Bacteria; p__Bacteroidota; c__Bacteroidia; o__Bacteroidales; f__Muribaculaceae; g__Muribaculaceae; s__	23
OTU_1250	k__Bacteria; p__Firmicutes; c__Clostridia; o__Peptostreptococcales-Tissierellales; f__Peptostreptococcales-Tissierellales; g__Anaerococcus	14
OTU_1257	k__Bacteria; p__Firmicutes; c__Clostridia; o__Oscillospirales; f__Ruminococcaceae; g__Candidatus_Soleaferrea; s__Ruminococcaceae_bacterium	12
OTU_1285	k__Bacteria; p__Firmicutes; c__Clostridia; o__Oscillospirales; f__Ruminococcaceae; g__; s__	18
OTU_1313	k__Bacteria; p__Cyanobacteria; c__Cyanobacteriia; o__Chloroplast; f__Chloroplast; g__Chloroplast	13
OTU_1336	k__Bacteria; p__Firmicutes; c__Clostridia; o__Oscillospirales; f__Oscillospiraceae; g__UCG-005; s__	11
OTU_1352	k__Bacteria	2
OTU_1376	k__Bacteria; p__Bacteroidota; c__Bacteroidia; o__Flavobacteriales; f__NS9_marine_group; g__NS9_marine_group; s__	14
OTU_1392	k__Bacteria; p__Bacteroidota; c__Bacteroidia; o__Bacteroidales; f__Muribaculaceae; g__Muribaculaceae; s__	13
OTU_1400	k__Bacteria; p__Firmicutes; c__Clostridia; o__Oscillospirales; f__Ruminococcaceae; g__Anaerotruncus; s__Anaerotruncus_colihominis	5
OTU_1401	k__Bacteria; p__Firmicutes; c__Negativicutes; o__Veillonellales-Selenomonadales; f__Selenomonadaceae; g__Quinella; s__	11
OTU_1426	k__Bacteria	6
OTU_1442	k__Bacteria; p__Marinimicrobia_(SAR406_clade); c__Marinimicrobia_(SAR406_clade); o__Marinimicrobia_(SAR406_clade); f__Marinimicrobia_(SAR406_clade); g__Marinimicrobia_(SAR406_clade); s__	12
OTU_1453	k__Bacteria; p__Proteobacteria; c__Alphaproteobacteria; o__Puniceispirillales; f__SAR116_clade; g__SAR116_clade; s__	7
OTU_1477	k__Bacteria; p__Acidobacteriota; c__Acidobacteriae; o__Subgroup_2; f__Subgroup_2; g__Subgroup_2; s__	8
OTU_1479	Unknown	8
OTU_1480	k__Bacteria; p__Armatimonadota; c__Armatimonadia; o__Armatimonadales; f__Armatimonadales; g__Armatimonadales; s__	9
OTU_1565	k__Bacteria; p__Proteobacteria; c__Gammaproteobacteria; o__Burkholderiales; f__Hydrogenophilaceae; g__Tepidiphilus; s__	2
OTU_1595	k__Bacteria; p__Firmicutes; c__Clostridia; o__Lachnospirales; f__Lachnospiraceae; g__Lachnospiraceae_NK4A136_group; s__	7
OTU_1625	k__Bacteria; p__Firmicutes; c__Clostridia; o__Oscillospirales; f__Ruminococcaceae; g__Candidatus_Soleaferrea; s__Clostridiaceae_bacterium	8
OTU_1630	k__Bacteria; p__Firmicutes; c__Clostridia; o__Oscillospirales	6
OTU_1658	Unknown	5
OTU_1691	k__Bacteria; p__Bacteroidota; c__Bacteroidia; o__Bacteroidales; f__Muribaculaceae; g__Muribaculaceae; s__	7
OTU_1699	k__Bacteria; p__SAR324_clade(Marine_group_B); c__SAR324_clade(Marine_group_B); o__SAR324_clade(Marine_group_B); f__SAR324_clade(Marine_group_B); g__SAR324_clade(Marine_group_B); s__SAR324_cluster	17
OTU_1715	Unknown	7
OTU_1725	k__Bacteria; p__Bacteroidota; c__Bacteroidia; o__Bacteroidales; f__Muribaculaceae; g__Muribaculaceae; s__	6
OTU_1728	k__Bacteria; p__Bacteroidota; c__Bacteroidia; o__Bacteroidales; f__Prevotellaceae; g__Prevotellaceae_NK3B31_group; s__	7
OTU_1732	Unknown	6
OTU_1733	k__Bacteria; p__Chloroflexi; c__OLB14; o__OLB14; f__OLB14; g__OLB14; s__	1
OTU_1745	k__Bacteria; p__Bacteroidota; c__Bacteroidia; o__Bacteroidales; f__Rikenellaceae; g__Rikenella; s__Rikenella_microfusus	11
OTU_1764	k__Bacteria; p__Firmicutes; c__Clostridia; o__Peptostreptococcales-Tissierellales; f__Anaerovoracaceae; g__Family_XIII_AD3011_group; s__	6
OTU_1784	Unknown	7
OTU_1797	k__Bacteria; p__Proteobacteria; c__Alphaproteobacteria; o__Defluviicoccales; f__; g__; s__hydrothermal_vent	5
OTU_1824	k__Bacteria; p__Desulfobacterota; c__Desulfovibrionia; o__Desulfovibrionales; f__Desulfovibrionaceae; g__Bilophila; s__	1
OTU_1873	Unknown	4
OTU_1898	k__Bacteria	3
OTU_1938	k__Bacteria; p__Firmicutes; c__; o__; f__; g__	5
OTU_1940	Unknown	4
OTU_1950	Unknown	4
OTU_1978	k__Bacteria; p__Deinococcota; c__Deinococci; o__Deinococcales; f__Trueperaceae; g__Truepera; s__	6
OTU_1980	k__Bacteria; p__Desulfobacterota; c__Desulfovibrionia; o__Desulfovibrionales; f__Desulfovibrionaceae; g__Desulfovibrio	5
OTU_2061	k__Bacteria	2
OTU_2068	k__Bacteria; p__Proteobacteria; c__Gammaproteobacteria; o__Oceanospirillales; f__Pseudohongiellaceae; g__Pseudohongiella; s__	3
OTU_2123	k__Bacteria; p__Bacteroidota; c__Bacteroidia; o__Bacteroidales; f__Muribaculaceae; g__Muribaculaceae; s__	18
OTU_2126	Unknown	6
OTU_2131	k__Bacteria; p__Proteobacteria; c__Gammaproteobacteria; o__Burkholderiales; f__Nitrosomonadaceae; g__IS-44; s__	7
OTU_2132	k__Bacteria; p__Proteobacteria; c__Gammaproteobacteria; o__Burkholderiales; f__Nitrosomonadaceae; g__IS-44; s__	6
OTU_2133	k__Bacteria; p__Deinococcota; c__Deinococci; o__Deinococcales; f__Trueperaceae; g__Truepera; s__	5
OTU_2136	Unknown	3
OTU_2146	k__Bacteria; p__Cyanobacteria; c__Cyanobacteriia; o__Chloroplast; f__Chloroplast; g__Chloroplast; s__environmental_clone	6
OTU_2172	k__Bacteria; p__Firmicutes; c__Clostridia; o__Clostridiales; f__Clostridiaceae	7
OTU_2175	k__Bacteria; p__Proteobacteria; c__Gammaproteobacteria; o__Burkholderiales; f__Methylophilaceae; g__OM43_clade	10
OTU_2182	Unknown	6
OTU_2207	k__Bacteria; p__Firmicutes; c__Clostridia; o__Oscillospirales; f__Ruminococcaceae; g__; s__	6
OTU_2240	k__Bacteria; p__Firmicutes; c__Clostridia; o__Lachnospirales; f__Lachnospiraceae	4
OTU_2264	k__Bacteria; p__Firmicutes; c__Clostridia; o__Clostridia_UCG-014; f__Clostridia_UCG-014; g__Clostridia_UCG-014; s__	8
OTU_2276	k__Bacteria; p__Firmicutes; c__Clostridia; o__Oscillospirales; f__Oscillospiraceae; g__Oscillibacter; s__	4
OTU_2288	k__Bacteria; p__Bacteroidota; c__Bacteroidia; o__Bacteroidales; f__Muribaculaceae; g__Muribaculaceae; s__	6
OTU_2290	k__Bacteria	3
OTU_2294	k__Bacteria	2
OTU_2299	k__Bacteria; p__Firmicutes; c__Clostridia; o__Oscillospirales; f__Butyricicoccaceae	7
OTU_2303	k__Bacteria; p__Actinobacteriota; c__Rubrobacteria; o__Rubrobacterales; f__Rubrobacteriaceae; g__Rubrobacter	6
OTU_2310	Unknown	1
OTU_2311	Unknown	1
OTU_2326	k__Bacteria	5
OTU_2329	k__Bacteria; p__Firmicutes; c__Clostridia; o__Lachnospirales; f__Lachnospiraceae; g__Acetatifactor; s__	4
OTU_2330	k__Bacteria; p__Bacteroidota; c__Bacteroidia; o__Chitinophagales; f__Saprospiraceae; g__; s__	6
OTU_2339	k__Bacteria; p__Gemmatimonadota; c__BD2-11_terrestrial_group; o__BD2-11_terrestrial_group; f__BD2-11_terrestrial_group; g__BD2-11_terrestrial_group; s__	5
OTU_2381	k__Bacteria; p__Bacteroidota; c__Bacteroidia; o__Bacteroidales; f__Muribaculaceae; g__Muribaculaceae; s__	13
OTU_2388	Unknown	3
OTU_2399	k__Bacteria; p__Elusimicrobiota; c__Elusimicrobia; o__Elusimicrobiales; f__Elusimicrobiaceae; g__Elusimicrobium; s__	3
OTU_2402	k__Bacteria; p__Bacteroidota; c__Bacteroidia; o__Bacteroidales; f__Muribaculaceae; g__Muribaculaceae; s__	13
OTU_2430	Unknown	5
OTU_2435	k__Bacteria	2
OTU_2448	Unknown	2
OTU_2457	k__Bacteria; p__Firmicutes; c__Clostridia; o__Lachnospirales; f__Lachnospiraceae	10
OTU_2479	k__Bacteria; p__Cyanobacteria; c__Cyanobacteriia; o__Chloroplast; f__Chloroplast; g__Chloroplast; s__Phalacroma_mitra	3
OTU_2509	k__Bacteria; p__Bacteroidota; c__Bacteroidia; o__Bacteroidales; f__Tannerellaceae; g__Parabacteroides; s__	36
OTU_2562	k__Bacteria; p__Bacteroidota; c__Bacteroidia; o__Bacteroidales; f__Marinifilaceae; g__Butyricimonas; s__	5
OTU_2618	k__Bacteria; p__Proteobacteria; c__Alphaproteobacteria; o__Rhodospirillales; f__; g__; s__Azospirillum_sp.	6
OTU_2620	k__Bacteria; p__Bacteroidota; c__Bacteroidia; o__Bacteroidales; f__Muribaculaceae; g__Muribaculaceae; s__	3
OTU_2637	Unknown	3
OTU_2639	Unknown	1
OTU_2679	k__Bacteria	3
OTU_2683	k__Bacteria	3
OTU_2688	k__Bacteria; p__Firmicutes; c__Clostridia; o__Oscillospirales; f__Eubacterium_coprostanoligenes_group; g__Eubacterium_coprostanoligenes_group; s__	6
OTU_2715	k__Bacteria	2
OTU_2724	k__Bacteria; p__Actinobacteriota; c__Acidimicrobiia; o__Actinomarinales; f__Actinomarinaceae; g__Candidatus_Actinomarina; s__	3
OTU_2748	k__Bacteria; p__Firmicutes; c__Clostridia; o__Lachnospirales; f__Lachnospiraceae; g__Lachnospiraceae_NK4A136_group; s__	10
OTU_2823	k__Bacteria; p__Firmicutes; c__Clostridia; o__Oscillospirales; f__Ruminococcaceae; g__Pygmaiobacter; s__	3
OTU_2827	k__Bacteria; p__Proteobacteria; c__Alphaproteobacteria	2
OTU_2850	Unknown	2
OTU_2855	k__Bacteria; p__Firmicutes; c__Clostridia; o__Peptococcales; f__Peptococcaceae; g__; s__	3
OTU_2879	k__Bacteria; p__Proteobacteria; c__Gammaproteobacteria; o__Burkholderiales; f__Sutterellaceae; g__Parasutterella; s__	3
OTU_2881	k__Bacteria; p__Firmicutes; c__Clostridia; o__Oscillospirales; f__Oscillospiraceae; g__Oscillibacter; s__	4
OTU_2901	k__Bacteria; p__Dependentiae; c__Babeliae; o__Babeliales; f__Babeliaceae; g__Babeliaceae; s__	2
OTU_2908	k__Bacteria; p__Firmicutes; c__Clostridia; o__Lachnospirales; f__Lachnospiraceae	5
OTU_2910	k__Bacteria; p__Firmicutes; c__Clostridia; o__Oscillospirales; f__Oscillospiraceae	4
OTU_2911	k__Bacteria; p__Actinobacteriota; c__Coriobacteriia; o__Coriobacteriales; f__Atopobiaceae	3
OTU_2914	k__Bacteria; p__Firmicutes; c__Clostridia; o__Oscillospirales; f__Oscillospiraceae; g__NK4A214_group; s__	4
OTU_2920	k__Bacteria; p__Firmicutes; c__Clostridia; o__Clostridia_UCG-014; f__Clostridia_UCG-014; g__Clostridia_UCG-014; s__	13
OTU_2981	k__Bacteria; p__Proteobacteria; c__Gammaproteobacteria; o__OM182_clade; f__OM182_clade; g__OM182_clade; s__	2
OTU_3020	Unknown	2
OTU_3055	Unknown	2
OTU_3072	k__Bacteria; p__Actinobacteriota; c__Acidimicrobiia; o__Microtrichales; f__Microtrichaceae; g__; s__	1
OTU_3084	Unknown	12
OTU_3100	k__Bacteria; p__Firmicutes; c__Clostridia; o__Clostridia_vadinBB60_group; f__Clostridia_vadinBB60_group; g__Clostridia_vadinBB60_group; s__	3
OTU_3178	k__Bacteria; p__Firmicutes; c__Bacilli; o__Acholeplasmatales; f__Acholeplasmataceae; g__Anaeroplasma; s__	2
OTU_3193	Unknown	2
OTU_3197	Unknown	2
OTU_3206	k__Bacteria; p__Firmicutes; c__Clostridia; o__Oscillospirales; f__Ruminococcaceae; g__; s__	5
OTU_3229	Unknown	2
OTU_3234	k__Bacteria; p__Bacteroidota; c__Bacteroidia; o__Sphingobacteriales; f__NS11-12_marine_group; g__NS11-12_marine_group; s__	3
OTU_3248	Unknown	1
OTU_3255	Unknown	2
OTU_3270	k__Bacteria; p__Proteobacteria; c__Gammaproteobacteria; o__Burkholderiales; f__Nitrosomonadaceae; g__mle1-7; s__	1
OTU_3281	k__Bacteria; p__Firmicutes; c__Clostridia; o__Oscillospirales; f__Butyricicoccaceae; g__UCG-009	3
OTU_3282	Unknown	1
OTU_3285	k__Bacteria; p__Firmicutes; c__Clostridia; o__Clostridia_UCG-014; f__Clostridia_UCG-014; g__Clostridia_UCG-014; s__	3
OTU_3291	Unknown	1
OTU_3294	k__Bacteria; p__Actinobacteriota; c__Acidimicrobiia; o__Microtrichales; f__Ilumatobacteraceae	3
OTU_3309	Unknown	1
OTU_3314	Unknown	1
OTU_3316	k__Bacteria; p__Cyanobacteria; c__Vampirivibrionia; o__Gastranaerophilales; f__Gastranaerophilales; g__Gastranaerophilales; s__	5
OTU_3317	Unknown	1
OTU_3322	Unknown	1
OTU_3329	k__Bacteria; p__Firmicutes; c__Clostridia	4
OTU_3341	k__Bacteria; p__Firmicutes; c__Clostridia; o__Oscillospirales	2
OTU_3347	k__Bacteria	1
OTU_3371	Unknown	1
OTU_3377	Unknown	1
OTU_3384	k__Bacteria; p__Firmicutes; c__Clostridia; o__Oscillospirales; f__Ruminococcaceae; g__; s__	1
OTU_3386	Unknown	1
OTU_3403	Unknown	1
OTU_3424	k__Bacteria	1
OTU_3426	k__Bacteria	1
OTU_3432	k__Bacteria; p__Firmicutes; c__Bacilli; o__Erysipelotrichales; f__Erysipelotrichaceae; g__; s__	2
OTU_3437	Unknown	1
OTU_3450	Unknown	1
OTU_3486	k__Bacteria; p__Firmicutes; c__Clostridia; o__Christensenellales; f__Christensenellaceae; g__Christensenellaceae_R-7_group	1
OTU_3527	k__Bacteria	1
OTU_3537	k__Bacteria; p__Firmicutes; c__Clostridia; o__Lachnospirales; f__Lachnospiraceae; g__; s__	2
OTU_3546	Unknown	1
OTU_3553	k__Bacteria; p__Bacteroidota; c__Bacteroidia	2
OTU_3556	k__Bacteria	1
OTU_3558	Unknown	1
OTU_3582	Unknown	2
OTU_3594	k__Bacteria; p__Firmicutes; c__Clostridia; o__Clostridia_vadinBB60_group; f__Clostridia_vadinBB60_group; g__Clostridia_vadinBB60_group; s__	4
OTU_3601	k__Bacteria; p__Proteobacteria; c__Gammaproteobacteria; o__Burkholderiales; f__Methylophilaceae; g__OM43_clade; s__	29
OTU_3637	k__Bacteria; p__Firmicutes; c__Clostridia; o__Lachnospirales; f__Lachnospiraceae; g__; s__	2
OTU_3649	k__Bacteria; p__Firmicutes; c__Clostridia; o__Clostridiales; f__Caloramatoraceae; g__; s__	3
OTU_3670	k__Bacteria; p__Bacteroidota; c__Bacteroidia; o__Bacteroidales; f__Muribaculaceae; g__Muribaculaceae; s__	1
OTU_3678	Unknown	3
OTU_3680	k__Bacteria; p__Firmicutes; c__Bacilli; o__Lactobacillales; f__Aerococcaceae; g__Abiotrophia; s__	2
OTU_3691	Unknown	2
OTU_3709	k__Bacteria	2
OTU_3728	k__Bacteria	1
OTU_3743	k__Bacteria	1
OTU_3765	Unknown	1
OTU_3770	Unknown	2
OTU_3771	k__Bacteria; p__Firmicutes; c__Clostridia; o__Lachnospirales; f__Lachnospiraceae; g__Lachnospiraceae_UCG-006	1
OTU_3772	Unknown	2
OTU_3781	Unknown	1
OTU_3811	k__Bacteria; p__Firmicutes; c__Clostridia; o__Oscillospirales; f__Oscillospirales; g__Hydrogenoanaerobacterium; s__	1
OTU_3816	Unknown	3
OTU_3830	Unknown	1
OTU_3833	Unknown	1
OTU_3889	k__Bacteria; p__Patescibacteria; c__Saccharimonadia; o__Saccharimonadales; f__Saccharimonadaceae; g__Candidatus_Saccharimonas; s__	2
OTU_3894	k__Bacteria	1
OTU_3895	k__Bacteria; p__Proteobacteria; c__Alphaproteobacteria; o__Rickettsiales; f__Mitochondria; g__Mitochondria	1
OTU_3911	Unknown	2
OTU_3925	k__Bacteria; p__Actinobacteriota; c__Actinobacteria; o__Micrococcales; f__Micrococcaceae; g__Pseudarthrobacter	2
OTU_3929	Unknown	2
OTU_3978	Unknown	2
OTU_3987	k__Bacteria	2
OTU_3993	Unknown	1
OTU_3994	Unknown	1
OTU_4000	k__Bacteria; p__Firmicutes; c__Clostridia; o__Lachnospirales; f__Lachnospiraceae	1
OTU_4004	Unknown	2
OTU_4010	Unknown	1
OTU_4011	Unknown	2
OTU_4012	k__Bacteria; p__Bacteroidota; c__Bacteroidia; o__Bacteroidales; f__Dysgonomonadaceae; g__	2
OTU_4057	k__Bacteria; p__Firmicutes; c__Clostridia	2
OTU_4061	Unknown	1
OTU_4062	Unknown	2
OTU_4070	k__Bacteria; p__Bacteroidota; c__Bacteroidia; o__Bacteroidales; f__Prevotellaceae	3
OTU_4074	k__Bacteria; p__Firmicutes; c__Clostridia; o__Lachnospirales; f__Lachnospiraceae; g__Lachnospiraceae_NK4A136_group	7
OTU_4088	Unknown	1
OTU_4093	k__Bacteria; p__Firmicutes; c__Clostridia; o__Lachnospirales; f__Defluviitaleaceae; g__Defluviitaleaceae_UCG-011; s__	2
OTU_4095	k__Bacteria; p__Bacteroidota; c__Bacteroidia; o__Bacteroidales	1
OTU_4097	Unknown	1
OTU_4117	Unknown	1
OTU_4135	k__Bacteria; p__Firmicutes; c__Clostridia; o__Lachnospirales; f__Lachnospiraceae	4
OTU_4155	k__Bacteria	3
OTU_4163	k__Bacteria; p__Firmicutes; c__Clostridia; o__Lachnospirales; f__Lachnospiraceae; g__Tyzzerella; s__	2
OTU_4176	k__Bacteria; p__Proteobacteria; c__Alphaproteobacteria; o__Rhizobiales; f__Beijerinckiaceae; g__; s__Salinarimonas_sp.	2
OTU_4188	k__Bacteria; p__Firmicutes; c__Clostridia; o__Lachnospirales; f__Lachnospiraceae	1
OTU_4198	Unknown	1
OTU_4216	k__Bacteria; p__Bacteroidota; c__Bacteroidia; o__Bacteroidales; f__Bacteroidaceae; g__Bacteroides; s__Bacteroides_acidifaciens	1
OTU_4217	k__Bacteria; p__Proteobacteria; c__Gammaproteobacteria; o__Oceanospirillales; f__Litoricolaceae; g__Litoricola; s__	3
OTU_4256	k__Bacteria; p__Firmicutes; c__Bacilli; o__Erysipelotrichales; f__Erysipelatoclostridiaceae	1
OTU_4271	Unknown	1
OTU_4289	Unknown	2
OTU_4311	Unknown	2
OTU_4313	k__Bacteria; p__Bacteroidota; c__Bacteroidia; o__Flavobacteriales; f__Flavobacteriaceae; g__NS5_marine_group; s__	2
OTU_4314	Unknown	1
OTU_4323	k__Bacteria	1
OTU_4334	k__Bacteria; p__Bacteroidota; c__Bacteroidia; o__Cytophagales	1
OTU_4336	Unknown	1
OTU_4338	Unknown	1
OTU_4341	Unknown	1
OTU_4343	Unknown	1
OTU_4344	Unknown	1
OTU_4345	Unknown	1
OTU_4350	Unknown	1
OTU_4351	Unknown	1
OTU_4353	Unknown	1
OTU_4354	Unknown	1
OTU_4357	k__Bacteria	1
OTU_4358	Unknown	1
OTU_4359	Unknown	1
OTU_4360	Unknown	1
OTU_4365	Unknown	1
OTU_4367	Unknown	2
OTU_4369	k__Bacteria	1
OTU_4370	Unknown	1
OTU_4381	Unknown	1
OTU_4382	Unknown	1
OTU_4385	Unknown	1
OTU_4392	k__Bacteria; p__Firmicutes; c__Clostridia; o__Lachnospirales; f__Lachnospiraceae; g__ASF356; s__	3
OTU_4402	k__Bacteria; p__Bacteroidota; c__Bacteroidia; o__Bacteroidales; f__Rikenellaceae; g__Alistipes; s__	2
OTU_4420	k__Bacteria; p__Bacteroidota; c__Bacteroidia; o__Bacteroidales; f__Muribaculaceae; g__Muribaculaceae	2
OTU_4471	Unknown	1
OTU_4494	Unknown	1
OTU_4499	Unknown	1
OTU_4508	Unknown	1
OTU_4513	Unknown	1
OTU_4535	Unknown	1
OTU_4540	k__Bacteria; p__Firmicutes; c__Clostridia	1
OTU_4544	k__Bacteria; p__Cyanobacteria; c__Vampirivibrionia; o__Gastranaerophilales; f__Gastranaerophilales; g__Gastranaerophilales; s__	3
OTU_4570	Unknown	1
OTU_4571	k__Bacteria	1
OTU_4579	Unknown	1
OTU_4587	k__Bacteria	1
OTU_4592	Unknown	1
OTU_4595	Unknown	2
OTU_4601	Unknown	1
OTU_4604	Unknown	1
OTU_4611	Unknown	1
OTU_4617	Unknown	1
OTU_4619	Unknown	1
OTU_4623	Unknown	1
OTU_4631	Unknown	1
OTU_4632	k__Bacteria	1
OTU_4635	Unknown	1
OTU_4638	Unknown	1
OTU_4639	Unknown	1
OTU_4652	Unknown	1
OTU_4657	Unknown	1
OTU_4660	Unknown	1
OTU_4672	k__Bacteria	1
OTU_4709	Unknown	2
OTU_4716	Unknown	3
OTU_4729	k__Bacteria	1
OTU_4732	k__Bacteria; p__Proteobacteria; c__Gammaproteobacteria; o__Enterobacterales	1
OTU_4766	Unknown	1
OTU_4772	Unknown	1
OTU_4773	Unknown	1
OTU_4789	k__Bacteria	2
OTU_4790	Unknown	1
OTU_4792	k__Bacteria; p__Patescibacteria; c__Saccharimonadia; o__Saccharimonadales; f__Saccharimonadales; g__Saccharimonadales; s__	2
OTU_4813	Unknown	1
OTU_4820	Unknown	1
OTU_4822	k__Bacteria	1
OTU_4835	Unknown	1
OTU_4839	k__Bacteria; p__Firmicutes; c__Clostridia; o__Clostridia_vadinBB60_group; f__Clostridia_vadinBB60_group; g__Clostridia_vadinBB60_group	4
OTU_4840	Unknown	1
OTU_4841	k__Bacteria	1
OTU_4848	Unknown	1
OTU_4851	Unknown	1
OTU_4852	Unknown	1
OTU_4856	k__Bacteria; p__Firmicutes; c__Clostridia; o__Oscillospirales; f__Ruminococcaceae	2
OTU_4863	k__Bacteria; p__Firmicutes; c__Clostridia; o__Oscillospirales; f__Ruminococcaceae; g__; s__	1
OTU_4865	Unknown	1
OTU_4867	Unknown	1
OTU_4869	k__Bacteria	1
OTU_4872	Unknown	1
OTU_4876	Unknown	1
OTU_4877	Unknown	1
OTU_4883	Unknown	1
OTU_4884	Unknown	1
OTU_4885	Unknown	1
OTU_4894	Unknown	1
OTU_4912	Unknown	1
OTU_4927	Unknown	1
OTU_4928	k__Bacteria	1
OTU_4935	Unknown	1
OTU_4938	Unknown	1
OTU_4944	Unknown	1
OTU_4946	Unknown	1
OTU_4947	Unknown	1
OTU_4954	Unknown	1
OTU_4960	Unknown	2
OTU_4965	Unknown	1
OTU_4970	Unknown	1
OTU_4972	Unknown	1
OTU_4977	Unknown	1
OTU_4978	Unknown	1
OTU_4986	Unknown	2
OTU_4992	Unknown	1
OTU_4993	Unknown	1
OTU_4996	Unknown	1
OTU_5003	Unknown	1
OTU_5004	Unknown	1
OTU_5041	k__Bacteria; p__Firmicutes; c__Clostridia; o__Lachnospirales; f__Lachnospiraceae; g__Roseburia	1
OTU_5047	Unknown	1
OTU_5057	Unknown	1
OTU_5063	Unknown	1
OTU_5069	Unknown	1
OTU_5071	Unknown	1
OTU_5096	Unknown	1
OTU_5097	Unknown	1
OTU_5100	Unknown	1
OTU_5101	Unknown	1
OTU_5102	Unknown	1
OTU_5137	Unknown	1
OTU_5140	k__Bacteria	1
OTU_5144	Unknown	1
OTU_5161	Unknown	1
OTU_5162	Unknown	1
OTU_5165	Unknown	1
OTU_5169	Unknown	1
OTU_5172	Unknown	1
OTU_5180	Unknown	1
OTU_5190	Unknown	1
OTU_5207	Unknown	1
OTU_5214	Unknown	1
OTU_5221	Unknown	1
OTU_5226	Unknown	1
OTU_5228	Unknown	1
OTU_5233	Unknown	1
OTU_5235	Unknown	1
OTU_5236	Unknown	1
OTU_5237	Unknown	1
OTU_5247	Unknown	1
OTU_5248	Unknown	1
OTU_5250	Unknown	2
OTU_5251	k__Bacteria	1
OTU_5274	Unknown	2
OTU_5279	Unknown	1
OTU_5285	Unknown	1
OTU_5286	Unknown	1
OTU_5293	Unknown	1
OTU_5294	Unknown	1
OTU_5296	Unknown	1
OTU_5299	k__Bacteria	1
OTU_5303	Unknown	1
OTU_5309	Unknown	1
OTU_5312	k__Bacteria	1
OTU_5313	Unknown	1
OTU_5326	Unknown	1
OTU_5328	k__Bacteria	1
OTU_5331	Unknown	1
OTU_5332	Unknown	1
OTU_5340	Unknown	1
OTU_5350	Unknown	1
OTU_5368	k__Bacteria; p__Cyanobacteria; c__Vampirivibrionia; o__Gastranaerophilales; f__Gastranaerophilales; g__Gastranaerophilales; s__	1
OTU_5370	Unknown	1
OTU_5372	Unknown	1
OTU_5377	k__Bacteria; p__Firmicutes; c__Clostridia; o__Lachnospirales; f__Lachnospiraceae	1
OTU_5390	Unknown	1
OTU_5393	Unknown	1
OTU_5396	Unknown	1
OTU_5402	Unknown	1
OTU_5405	k__Bacteria	1
OTU_5430	k__Bacteria	1
OTU_5433	Unknown	1
OTU_5436	Unknown	1
OTU_5437	Unknown	1
OTU_5446	Unknown	1
OTU_5452	k__Bacteria	1
OTU_5453	Unknown	1
OTU_5455	Unknown	1
OTU_5471	Unknown	1
OTU_5472	Unknown	1
OTU_5474	k__Bacteria	1
OTU_5477	k__Bacteria; p__Firmicutes; c__Clostridia; o__Oscillospirales; f__UCG-010; g__UCG-010	1
OTU_5495	Unknown	1
OTU_5504	Unknown	1
OTU_5514	Unknown	1
OTU_5520	Unknown	1
OTU_5525	k__Bacteria; p__Firmicutes; c__Clostridia; o__Oscillospirales; f__Butyricicoccaceae; g__UCG-009; s__	1
OTU_5530	k__Bacteria; p__Firmicutes; c__Clostridia; o__Lachnospirales; f__Lachnospiraceae; g__Blautia	1
OTU_5570	Unknown	1
OTU_5575	Unknown	1
OTU_5610	k__Bacteria	1
OTU_5612	Unknown	1
OTU_5613	Unknown	1
OTU_5655	k__Bacteria; p__Firmicutes; c__Bacilli; o__RF39; f__RF39; g__RF39; s__	1
OTU_5666	Unknown	1
OTU_5673	k__Bacteria; p__Myxococcota; c__Myxococcia; o__Myxococcales; f__Anaeromyxobacteraceae; g__Anaeromyxobacter; s__	1
OTU_5685	Unknown	1
OTU_5708	k__Bacteria	1
OTU_5723	Unknown	1
OTU_5727	Unknown	1
OTU_5736	Unknown	1
OTU_5741	Unknown	1
OTU_5742	k__Bacteria; p__Firmicutes; c__Bacilli; o__Erysipelotrichales; f__Erysipelatoclostridiaceae; g__Coprobacillus	1
OTU_5750	k__Bacteria	2
OTU_5755	Unknown	1
OTU_5760	k__Bacteria; p__Firmicutes; c__Bacilli; o__RF39; f__RF39; g__RF39; s__	2
OTU_5796	Unknown	1
OTU_5804	k__Bacteria; p__Chloroflexi; c__Chloroflexia; o__Kallotenuales; f__AKIW781; g__AKIW781; s__	1
OTU_5807	k__Bacteria; p__Firmicutes; c__Clostridia; o__Oscillospirales; f__Ruminococcaceae; g__Incertae_Sedis; s__	3
OTU_5812	Unknown	1
OTU_5816	Unknown	1
OTU_5817	Unknown	1
OTU_5819	Unknown	1
OTU_5832	Unknown	1
OTU_5834	Unknown	1
OTU_5840	Unknown	1
OTU_5841	Unknown	1
OTU_5848	Unknown	1
OTU_5856	Unknown	1
OTU_5857	Unknown	1
OTU_5858	k__Bacteria	1
OTU_5864	k__Bacteria	1
OTU_5865	Unknown	1
OTU_5900	Unknown	1
OTU_5911	Unknown	1
OTU_5929	k__Bacteria	1
OTU_5940	Unknown	1
OTU_5943	Unknown	1
OTU_5947	Unknown	1
OTU_5965	Unknown	1
OTU_5977	Unknown	1
OTU_6001	Unknown	1
OTU_6006	Unknown	1
OTU_6016	k__Bacteria	1
OTU_6019	Unknown	1
OTU_6027	Unknown	1
OTU_6032	k__Bacteria; p__Firmicutes; c__Clostridia; o__Peptostreptococcales-Tissierellales; f__Sedimentibacteraceae; g__Sedimentibacter	1
OTU_6039	k__Bacteria; p__Firmicutes; c__Clostridia; o__Lachnospirales; f__Lachnospiraceae; g__Blautia; s__Lachnospiraceae_bacterium	1
OTU_6046	Unknown	1
OTU_6050	Unknown	1
OTU_6059	Unknown	1
OTU_6063	Unknown	1
OTU_6073	Unknown	1
OTU_6086	Unknown	1
OTU_6087	Unknown	1
OTU_6088	Unknown	1
OTU_6093	Unknown	1
OTU_6104	Unknown	1
OTU_6106	Unknown	1
OTU_6107	Unknown	1
OTU_6111	Unknown	1
OTU_6141	Unknown	1
OTU_6142	Unknown	1
OTU_6145	Unknown	1
OTU_6146	Unknown	1
OTU_6148	Unknown	1
OTU_6156	Unknown	1
OTU_6167	k__Bacteria; p__Bacteroidota; c__Bacteroidia; o__Bacteroidales; f__Muribaculaceae; g__Muribaculaceae; s__	1
OTU_6168	k__Bacteria; p__Bacteroidota; c__Bacteroidia; o__Bacteroidales; f__Bacteroidaceae; g__Bacteroides	11
OTU_6198	k__Bacteria; p__Proteobacteria; c__Gammaproteobacteria	1
OTU_6200	Unknown	1
OTU_6203	k__Bacteria	1
OTU_6211	Unknown	1
OTU_6212	Unknown	1
OTU_6214	Unknown	1
OTU_6220	Unknown	1
OTU_6223	Unknown	2
OTU_6228	Unknown	1
OTU_6229	k__Bacteria	1
OTU_6233	k__Bacteria	1
OTU_6234	Unknown	1
OTU_6238	Unknown	1
OTU_6242	Unknown	1
OTU_6246	Unknown	1
OTU_6250	k__Bacteria	1
OTU_6251	Unknown	1
OTU_6253	Unknown	1
OTU_6254	Unknown	1
OTU_6255	Unknown	1
OTU_6256	Unknown	1
OTU_6261	k__Bacteria; p__Gemmatimonadota; c__S0134_terrestrial_group; o__S0134_terrestrial_group; f__S0134_terrestrial_group; g__S0134_terrestrial_group; s__	1
OTU_6262	k__Bacteria	2
OTU_6268	Unknown	1
OTU_6269	Unknown	1
OTU_6271	Unknown	1
OTU_6275	Unknown	1
OTU_6281	Unknown	1
OTU_6292	k__Bacteria; p__Proteobacteria; c__Gammaproteobacteria; o__Burkholderiales; f__Sutterellaceae	1
OTU_6307	Unknown	1
OTU_6309	Unknown	1
OTU_6314	Unknown	1
OTU_6318	Unknown	1
OTU_6320	Unknown	1
OTU_6333	Unknown	1
OTU_6358	k__Bacteria; p__Bacteroidota; c__SJA-28; o__SJA-28; f__SJA-28; g__SJA-28	1
OTU_6360	k__Bacteria	1
OTU_6399	k__Bacteria; p__Firmicutes; c__Clostridia; o__Clostridia_UCG-014; f__Clostridia_UCG-014; g__Clostridia_UCG-014; s__	2
OTU_6412	k__Bacteria	1
OTU_6420	Unknown	1
OTU_6429	k__Bacteria	1
OTU_6436	Unknown	1
OTU_6440	k__Bacteria	1
OTU_6441	Unknown	1
OTU_6442	Unknown	1
OTU_6444	Unknown	1
OTU_6450	Unknown	1
OTU_6451	Unknown	1
OTU_6461	Unknown	1
OTU_6462	Unknown	1
OTU_6466	Unknown	1
OTU_6470	Unknown	1
OTU_6473	Unknown	1
OTU_6475	Unknown	1
OTU_6479	Unknown	1
OTU_6483	Unknown	1
OTU_6494	Unknown	1
OTU_6510	k__Bacteria; p__Firmicutes; c__Clostridia; o__Lachnospirales; f__Lachnospiraceae	2
OTU_6512	Unknown	1
OTU_6520	Unknown	1
OTU_6522	Unknown	1
OTU_6530	k__Bacteria; p__Proteobacteria; c__Alphaproteobacteria; o__Acetobacterales; f__Acetobacteraceae	1
OTU_6531	k__Bacteria; p__Firmicutes; c__Clostridia; o__Lachnospirales; f__Lachnospiraceae; g__GCA-900066575; s__	2
OTU_6541	Unknown	1
OTU_6542	Unknown	1
OTU_6549	k__Bacteria; p__Firmicutes; c__Bacilli; o__Erysipelotrichales; f__Erysipelotrichaceae; g__Dubosiella; s__Firmicutes_bacterium	1
OTU_6551	Unknown	1
OTU_6556	Unknown	1
OTU_6559	Unknown	1
OTU_6572	k__Bacteria; p__Deinococcota; c__Deinococci; o__Deinococcales; f__Deinococcaceae; g__Deinococcus; s__	1
OTU_6575	Unknown	1
OTU_6576	k__Bacteria	2
OTU_6590	Unknown	1
OTU_6592	k__Bacteria; p__Firmicutes; c__Clostridia	1
OTU_6597	k__Bacteria; p__Cyanobacteria; c__Cyanobacteriia; o__Chloroplast; f__Chloroplast; g__Chloroplast; s__Teleaulax_amphioxeia	2
OTU_6628	Unknown	1
OTU_6630	k__Bacteria; p__Firmicutes; c__Clostridia; o__Lachnospirales; f__Lachnospiraceae	1
OTU_6634	k__Bacteria; p__Firmicutes; c__Bacilli; o__Erysipelotrichales	1
OTU_6638	Unknown	1
OTU_6639	k__Bacteria; p__Bdellovibrionota; c__Bdellovibrionia; o__Bdellovibrionales; f__Bdellovibrionaceae; g__Bdellovibrio; s__	1
OTU_6655	Unknown	1
OTU_6657	Unknown	1
OTU_6661	Unknown	1
OTU_6702	Unknown	1
OTU_6703	Unknown	1
OTU_6704	k__Bacteria	1
OTU_6708	Unknown	1
OTU_6714	Unknown	1
OTU_6715	k__Bacteria; p__Proteobacteria; c__Gammaproteobacteria; o__UBA10353_marine_group; f__UBA10353_marine_group; g__UBA10353_marine_group; s__	4
OTU_6716	Unknown	1
OTU_6717	Unknown	1
OTU_6718	Unknown	1
OTU_6724	Unknown	1
OTU_6729	Unknown	1
OTU_6736	Unknown	1
OTU_6739	Unknown	1
OTU_6743	Unknown	1
OTU_6753	k__Bacteria	2
OTU_6756	k__Bacteria	1
OTU_6767	Unknown	1
OTU_6770	Unknown	1
OTU_6771	k__Bacteria; p__Proteobacteria; c__Alphaproteobacteria; o__Sphingomonadales; f__Sphingomonadaceae	1
OTU_6779	Unknown	1
OTU_6780	k__Bacteria; p__Deinococcota; c__Deinococci; o__Deinococcales; f__Deinococcaceae; g__Deinococcus; s__Deinococcus_papagonensis	1
OTU_6798	Unknown	1
OTU_6803	k__Bacteria	2
OTU_6805	Unknown	1
OTU_6807	Unknown	1
OTU_6819	Unknown	1
OTU_6820	Unknown	1
OTU_6821	k__Bacteria	1
OTU_6822	Unknown	1
OTU_6825	Unknown	1
OTU_6828	Unknown	1
OTU_6835	Unknown	1
OTU_6838	Unknown	1
OTU_6846	k__Bacteria; p__Firmicutes; c__Clostridia; o__Oscillospirales; f__Ruminococcaceae; g__Candidatus_Soleaferrea	1
OTU_6853	Unknown	1
OTU_6857	Unknown	1
OTU_6859	Unknown	1
OTU_6861	k__Bacteria	1
OTU_6870	Unknown	1
OTU_6887	Unknown	1
OTU_6900	k__Bacteria	1
OTU_6901	Unknown	1
OTU_6934	Unknown	1
OTU_6935	k__Bacteria	1
OTU_6937	k__Bacteria; p__Firmicutes; c__Clostridia; o__Lachnospirales; f__Lachnospiraceae; g__Lachnospiraceae_NK4A136_group; s__	1
OTU_6946	k__Bacteria; p__Firmicutes; c__Clostridia; o__Oscillospirales; f__Ruminococcaceae; g__Caproiciproducens; s__Clostridium_sp.	1
OTU_6951	Unknown	1
OTU_6953	Unknown	1
OTU_6956	Unknown	2
OTU_6959	k__Bacteria	2
OTU_6964	Unknown	1
OTU_6968	Unknown	1
OTU_6976	Unknown	1
OTU_6977	Unknown	1
OTU_6981	Unknown	1
OTU_6983	Unknown	1
OTU_6987	Unknown	1
OTU_6992	k__Bacteria; p__Proteobacteria; c__Alphaproteobacteria; o__Micropepsales; f__Micropepsaceae; g__; s__	1
OTU_6993	k__Bacteria; p__Firmicutes; c__Bacilli; o__Alicyclobacillales; f__Alicyclobacillaceae; g__Alicyclobacillus; s__Alicyclobacillus_acidoterrestris	1
OTU_6999	Unknown	1
OTU_7004	Unknown	1
OTU_7007	Unknown	1
OTU_7010	Unknown	1
OTU_7011	Unknown	1
OTU_7016	Unknown	1
OTU_7017	Unknown	1
OTU_7019	Unknown	1
OTU_7025	Unknown	1
OTU_7031	Unknown	1
OTU_7053	Unknown	1
OTU_7058	Unknown	1
OTU_7061	k__Bacteria; p__Firmicutes; c__Clostridia; o__Lachnospirales; f__Lachnospiraceae	4
OTU_7086	k__Bacteria; p__Bacteroidota; c__Bacteroidia; o__Bacteroidales; f__Muribaculaceae; g__Muribaculaceae; s__	9
OTU_7148	Unknown	1
OTU_7167	k__Bacteria; p__Cyanobacteria; c__Cyanobacteriia; o__Chloroplast; f__Chloroplast; g__Chloroplast; s__Phalacroma_mitra	2
OTU_7171	k__Bacteria; p__Proteobacteria; c__Gammaproteobacteria; o__Oceanospirillales; f__Nitrincolaceae; g__Motiliproteus; s__	2
OTU_7173	k__Bacteria; p__Firmicutes; c__Bacilli; o__Lactobacillales; f__Carnobacteriaceae; g__Atopostipes; s__	1
OTU_7175	Unknown	2
OTU_7194	k__Bacteria; p__Proteobacteria; c__Alphaproteobacteria; o__Defluviicoccales; f__; g__; s__	2
OTU_7212	Unknown	1
OTU_7213	k__Bacteria	1
OTU_7216	Unknown	1
OTU_7217	Unknown	1
OTU_7219	Unknown	1
OTU_7226	Unknown	1
OTU_7227	k__Bacteria	1
OTU_7229	Unknown	1
OTU_7230	k__Bacteria	1
OTU_7236	Unknown	1
OTU_7238	Unknown	1
OTU_7241	k__Bacteria	1
OTU_7246	Unknown	1
OTU_7251	k__Bacteria; p__Firmicutes; c__Limnochordia; o__Limnochordia; f__Limnochordia; g__Hydrogenispora; s__	1
OTU_7268	Unknown	1
OTU_7269	Unknown	1
OTU_7273	Unknown	1
OTU_7274	Unknown	1
OTU_7278	Unknown	1
OTU_7299	Unknown	1
OTU_7301	Unknown	1
OTU_7303	Unknown	1
OTU_7305	Unknown	1
OTU_7306	Unknown	1
OTU_7310	k__Bacteria	1
OTU_7311	Unknown	1
OTU_7312	k__Bacteria	2
OTU_7315	Unknown	1
OTU_7319	Unknown	1
OTU_7320	Unknown	1
OTU_7327	Unknown	1
OTU_7332	Unknown	1
OTU_7334	Unknown	1
OTU_7338	Unknown	1
OTU_7344	Unknown	1
OTU_7345	Unknown	1
OTU_7348	Unknown	1
OTU_7349	k__Bacteria; p__Firmicutes; c__Clostridia; o__Oscillospirales; f__Ruminococcaceae; g__Fournierella; s__	1
OTU_7354	Unknown	1
OTU_7407	k__Bacteria; p__Firmicutes; c__Clostridia; o__Oscillospirales; f__Ruminococcaceae	3
OTU_7443	Unknown	1
OTU_7451	Unknown	1
OTU_7452	Unknown	1
OTU_7453	Unknown	1
OTU_7455	Unknown	1
OTU_7460	Unknown	1
OTU_7461	Unknown	1
OTU_7464	Unknown	1
OTU_7487	k__Bacteria; p__Firmicutes; c__Clostridia; o__Oscillospirales; f__Ruminococcaceae	1
OTU_7494	k__Bacteria; p__Firmicutes; c__Clostridia	1
OTU_7499	Unknown	1
OTU_7501	Unknown	1
OTU_7502	Unknown	1
OTU_7507	Unknown	1
OTU_7509	Unknown	1
OTU_7514	Unknown	1
OTU_7519	Unknown	1
OTU_7520	Unknown	1
OTU_7525	Unknown	1
OTU_7528	k__Bacteria	2
OTU_7530	Unknown	1
OTU_7532	Unknown	1
OTU_7537	Unknown	1
OTU_7544	k__Bacteria; p__Patescibacteria; c__Saccharimonadia; o__Saccharimonadales; f__LWQ8; g__LWQ8; s__	1
OTU_7545	k__Bacteria; p__Proteobacteria; c__Gammaproteobacteria; o__SAR86_clade; f__SAR86_clade; g__SAR86_clade	3
OTU_7557	Unknown	1
OTU_7558	Unknown	1
OTU_7571	Unknown	1
OTU_7572	Unknown	1
OTU_7577	k__Bacteria	1
OTU_7580	Unknown	1
OTU_7591	Unknown	1
OTU_7608	k__Bacteria; p__Firmicutes	1

## Sheet: AeyW.uniq.otu
Table S4. List of common and unique OTUs in each sample category. (k;Kingdom, p;Phylum, c;Class, o;Order, f;Family, g;genus, species;s)
#OTU_number	Taxonomy	Mean sequence count of unique OTU of AeyW group
OTU_1176	k__Bacteria; p__Planctomycetota; c__Planctomycetes; o__Isosphaerales; f__Isosphaeraceae; g__Singulisphaera	9
OTU_1769	k__Bacteria; p__Proteobacteria; c__Gammaproteobacteria; o__Xanthomonadales; f__Rhodanobacteraceae; g__Dokdonella; s__	1
OTU_1813	k__Bacteria; p__Verrucomicrobiota; c__Verrucomicrobiae; o__Pedosphaerales; f__Pedosphaeraceae	7
OTU_2053	k__Bacteria; p__Patescibacteria; c__Parcubacteria	4
OTU_2067	k__Bacteria; p__Planctomycetota; c__Planctomycetes; o__Gemmatales; f__Gemmataceae	3
OTU_2140	k__Bacteria; p__Planctomycetota; c__Planctomycetes; o__Gemmatales; f__Gemmataceae; g__; s__	5
OTU_2267	k__Bacteria; p__Patescibacteria; c__Parcubacteria; o__Candidatus_Kaiserbacteria; f__Candidatus_Kaiserbacteria; g__Candidatus_Kaiserbacteria	5
OTU_2268	k__Bacteria; p__Verrucomicrobiota; c__Verrucomicrobiae; o__Pedosphaerales; f__Pedosphaeraceae	6
OTU_2344	k__Bacteria; p__Proteobacteria; c__Alphaproteobacteria; o__Rickettsiales	2
OTU_2353	k__Bacteria; p__Acidobacteriota; c__Acidobacteriae; o__Elev-16S-1166; f__Elev-16S-1166; g__Elev-16S-1166; s__	1
OTU_2356	k__Bacteria; p__Bacteroidota; c__Bacteroidia; o__Cytophagales; f__Cytophagaceae; g__Siphonobacter; s__Siphonobacter_aquaeclarae	4
OTU_2502	k__Bacteria; p__Planctomycetota; c__Phycisphaerae; o__Phycisphaerales; f__Phycisphaeraceae; g__SM1A02; s__	4
OTU_2564	k__Bacteria; p__Bacteroidota; c__Bacteroidia; o__Chitinophagales; f__Saprospiraceae; g__; s__	5
OTU_2641	k__Bacteria	4
OTU_2705	k__Bacteria	2
OTU_2740	k__Bacteria; p__Planctomycetota; c__Planctomycetes; o__Pirellulales; f__Pirellulaceae; g__; s__	5
OTU_2791	k__Bacteria; p__Planctomycetota; c__Planctomycetes; o__Gemmatales; f__Gemmataceae; g__Fimbriiglobus; s__	4
OTU_2927	k__Bacteria; p__Cyanobacteria; c__Cyanobacteriia	2
OTU_2930	k__Bacteria; p__Planctomycetota; c__Planctomycetes; o__Pirellulales; f__Pirellulaceae; g__Pirellula; s__	6
OTU_3009	k__Bacteria; p__Proteobacteria; c__Alphaproteobacteria; o__Rhodospirillales	2
OTU_3040	k__Bacteria; p__Proteobacteria; c__Gammaproteobacteria; o__Burkholderiales; f__Comamonadaceae	2
OTU_3170	k__Bacteria; p__Myxococcota; c__Polyangia; o__Polyangiales	2
OTU_3231	k__Bacteria; p__MBNT15; c__MBNT15; o__MBNT15; f__MBNT15; g__MBNT15; s__	3
OTU_3268	k__Bacteria; p__Proteobacteria; c__Alphaproteobacteria	1
OTU_3296	k__Bacteria; p__Proteobacteria; c__Gammaproteobacteria; o__Diplorickettsiales; f__Diplorickettsiaceae; g__Aquicella; s__	2
OTU_3305	k__Bacteria; p__Bacteroidota; c__Bacteroidia; o__Sphingobacteriales; f__Sphingobacteriaceae; g__Pedobacter	3
OTU_3339	k__Bacteria; p__Planctomycetota; c__Phycisphaerae; o__Phycisphaerales; f__Phycisphaeraceae; g__SM1A02; s__	4
OTU_3372	k__Bacteria; p__Myxococcota; c__Myxococcia; o__Myxococcales; f__Myxococcaceae; g__P3OB-42; s__	3
OTU_3374	k__Bacteria; p__Planctomycetota; c__Planctomycetes; o__Gemmatales; f__Gemmataceae; g__Fimbriiglobus; s__	1
OTU_3469	Unknown	2
OTU_3506	k__Bacteria; p__Planctomycetota; c__Phycisphaerae; o__Tepidisphaerales; f__CPla-3_termite_group; g__CPla-3_termite_group; s__	2
OTU_3554	k__Bacteria; p__Proteobacteria; c__Alphaproteobacteria; o__; f__; g__	1
OTU_3622	Unknown	1
OTU_3663	k__Bacteria; p__Proteobacteria; c__Alphaproteobacteria	1
OTU_3711	k__Bacteria; p__Planctomycetota; c__Planctomycetes; o__Gemmatales; f__Gemmataceae; g__Gemmata; s__	2
OTU_3740	k__Bacteria; p__Proteobacteria; c__Alphaproteobacteria	1
OTU_3802	k__Bacteria; p__Planctomycetota; c__Planctomycetes; o__Pirellulales; f__Pirellulaceae; g__Pirellula; s__	3
OTU_3820	k__Bacteria; p__Acidobacteriota; c__Blastocatellia	2
OTU_3838	Unknown	1
OTU_3859	k__Bacteria; p__Chloroflexi; c__Chloroflexia; o__Thermomicrobiales; f__JG30-KF-CM45; g__JG30-KF-CM45; s__	1
OTU_3864	k__Bacteria; p__Cyanobacteria; c__Sericytochromatia; o__Sericytochromatia; f__Sericytochromatia; g__Sericytochromatia; s__Cyanobacteria/Melainabacteria_group	2
OTU_3900	k__Bacteria; p__Proteobacteria; c__Alphaproteobacteria; o__Ferrovibrionales; f__Ferrovibrionales	1
OTU_3903	Unknown	1
OTU_3916	k__Bacteria; p__Bacteroidota; c__Bacteroidia; o__Cytophagales; f__Spirosomaceae; g__; s__	2
OTU_3922	k__Bacteria	1
OTU_3973	k__Bacteria; p__Planctomycetota; c__Planctomycetes; o__Gemmatales; f__Gemmataceae; g__Gemmata	2
OTU_3982	k__Bacteria; p__Cyanobacteria; c__Sericytochromatia; o__Sericytochromatia; f__Sericytochromatia; g__Sericytochromatia; s__	1
OTU_4021	k__Bacteria; p__Planctomycetota; c__Planctomycetes; o__Gemmatales; f__Gemmataceae; g__Gemmata; s__	1
OTU_4133	k__Bacteria; p__Proteobacteria; c__Alphaproteobacteria	1
OTU_4136	k__Bacteria; p__Planctomycetota; c__Planctomycetes; o__Pirellulales; f__Pirellulaceae	2
OTU_4171	k__Bacteria; p__Chloroflexi; c__Anaerolineae	1
OTU_4196	k__Bacteria; p__Cyanobacteria; c__Vampirivibrionia; o__Obscuribacterales; f__Obscuribacteraceae; g__Obscuribacteraceae; s__	2
OTU_4251	k__Bacteria; p__Verrucomicrobiota; c__Verrucomicrobiae; o__Opitutales; f__Opitutaceae	3
OTU_4373	k__Bacteria; p__Acidobacteriota; c__Vicinamibacteria; o__Vicinamibacterales; f__Vicinamibacteraceae; g__Vicinamibacteraceae; s__	3
OTU_4391	k__Bacteria; p__Proteobacteria; c__Gammaproteobacteria; o__Legionellales; f__Legionellaceae; g__Legionella; s__	1
OTU_4433	k__Bacteria; p__Planctomycetota; c__Planctomycetes; o__Gemmatales; f__Gemmataceae; g__; s__	1
OTU_4461	k__Bacteria; p__Planctomycetota; c__Planctomycetes; o__Planctomycetales; f__Rubinisphaeraceae; g__SH-PL14; s__	2
OTU_4531	k__Bacteria; p__Planctomycetota; c__Phycisphaerae; o__Phycisphaerales; f__Phycisphaeraceae; g__SM1A02; s__	1
OTU_4684	k__Bacteria	2
OTU_4691	Unknown	1
OTU_4706	k__Bacteria; p__Bacteroidota; c__Bacteroidia	2
OTU_4711	k__Bacteria; p__Actinobacteriota; c__Thermoleophilia; o__Gaiellales; f__; g__; s__	1
OTU_4714	k__Bacteria; p__Elusimicrobiota; c__Endomicrobia; o__Endomicrobiales; f__Endomicrobiaceae; g__Endomicrobium; s__	1
OTU_4718	k__Bacteria; p__Bdellovibrionota; c__Bdellovibrionia; o__Bdellovibrionales; f__Bdellovibrionaceae; g__Bdellovibrio; s__	1
OTU_4753	k__Bacteria; p__Proteobacteria; c__Gammaproteobacteria; o__Burkholderiales; f__Comamonadaceae; g__Comamonadaceae; s__	2
OTU_4799	k__Bacteria; p__Proteobacteria; c__Gammaproteobacteria; o__CHAB-XI-27; f__CHAB-XI-27; g__CHAB-XI-27; s__	2
OTU_4844	k__Bacteria; p__Proteobacteria; c__Gammaproteobacteria; o__Burkholderiales	2
OTU_4915	k__Bacteria; p__Acidobacteriota; c__Acidobacteriae; o__Elev-16S-1166; f__Elev-16S-1166; g__Elev-16S-1166	1
OTU_4921	k__Bacteria; p__Planctomycetota; c__Planctomycetes; o__Isosphaerales; f__Isosphaeraceae; g__Aquisphaera; s__	3
OTU_5007	k__Bacteria; p__Firmicutes; c__Clostridia; o__Oscillospirales; f__Oscillospiraceae; g__Papillibacter; s__	1
OTU_5024	k__Bacteria; p__Chloroflexi; c__Chloroflexia; o__Thermomicrobiales; f__JG30-KF-CM45; g__JG30-KF-CM45; s__	1
OTU_5026	k__Bacteria; p__Proteobacteria; c__Gammaproteobacteria; o__Burkholderiales; f__Comamonadaceae; g__Delftia	1
OTU_5130	k__Bacteria; p__Planctomycetota; c__Planctomycetes; o__Planctomycetales; f__; g__; s__	2
OTU_5191	k__Bacteria; p__Planctomycetota; c__Planctomycetes; o__Gemmatales; f__Gemmataceae	1
OTU_5204	k__Bacteria; p__Planctomycetota; c__Planctomycetes; o__Pirellulales; f__Pirellulaceae	2
OTU_5255	k__Bacteria	1
OTU_5289	k__Bacteria; p__Proteobacteria; c__Gammaproteobacteria; o__Burkholderiales	2
OTU_5357	k__Bacteria; p__Proteobacteria; c__Gammaproteobacteria	1
OTU_5358	k__Bacteria; p__Myxococcota; c__Polyangia	2
OTU_5363	k__Bacteria; p__Proteobacteria; c__Gammaproteobacteria; o__Diplorickettsiales; f__Diplorickettsiaceae; g__Aquicella; s__	1
OTU_5378	k__Bacteria	1
OTU_5486	k__Bacteria; p__Planctomycetota; c__Planctomycetes; o__Gemmatales; f__Gemmataceae; g__; s__	1
OTU_5516	k__Bacteria; p__Acidobacteriota; c__Acidobacteriae	1
OTU_5528	k__Bacteria; p__Myxococcota; c__Polyangia; o__mle1-27; f__mle1-27; g__mle1-27	2
OTU_5561	k__Bacteria; p__Proteobacteria; c__Gammaproteobacteria	1
OTU_5633	k__Bacteria; p__Patescibacteria; c__Saccharimonadia; o__Saccharimonadales; f__Saccharimonadales; g__Saccharimonadales; s__	4
OTU_5686	k__Bacteria; p__Planctomycetota; c__Planctomycetes; o__Pirellulales; f__Pirellulaceae; g__Pir4_lineage; s__	1
OTU_5731	k__Bacteria; p__Gemmatimonadota; c__Gemmatimonadetes; o__Gemmatimonadales; f__Gemmatimonadaceae	1
OTU_5782	k__Bacteria; p__Verrucomicrobiota; c__Chlamydiae; o__Chlamydiales; f__cvE6; g__cvE6	1
OTU_5827	k__Bacteria; p__Planctomycetota; c__Planctomycetes; o__Gemmatales; f__Gemmataceae; g__Gemmata; s__	2
OTU_5863	k__Bacteria; p__Planctomycetota; c__Planctomycetes; o__Gemmatales; f__Gemmataceae	2
OTU_5884	k__Bacteria; p__Planctomycetota; c__Planctomycetes; o__Pirellulales; f__Pirellulaceae; g__; s__	1
OTU_5910	k__Bacteria	1
OTU_5925	k__Bacteria; p__Proteobacteria; c__Alphaproteobacteria; o__Caulobacterales; f__Parvularculaceae; g__Amphiplicatus; s__	1
OTU_6014	k__Bacteria	3
OTU_6101	k__Bacteria; p__Bacteroidota; c__Bacteroidia; o__Chitinophagales; f__Saprospiraceae; g__Membranicola; s__	1
OTU_6218	Unknown	1
OTU_6240	k__Bacteria	1
OTU_6325	Unknown	1
OTU_6375	k__Bacteria; p__Bacteroidota; c__Bacteroidia; o__Chitinophagales; f__Saprospiraceae; g__; s__	2
OTU_6384	k__Bacteria; p__Proteobacteria; c__Alphaproteobacteria	1
OTU_6387	k__Bacteria; p__Planctomycetota; c__Phycisphaerae; o__Phycisphaerales; f__Phycisphaeraceae; g__SM1A02; s__	2
OTU_6428	k__Bacteria; p__Actinobacteriota; c__Acidimicrobiia; o__IMCC26256; f__IMCC26256; g__IMCC26256; s__	1
OTU_6508	k__Bacteria; p__Armatimonadota; c__; o__; f__; g__; s__	1
OTU_6527	k__Bacteria; p__Bacteroidota; c__Bacteroidia; o__Cytophagales; f__Cytophagaceae; g__Cytophaga; s__	1
OTU_6706	k__Bacteria; p__Proteobacteria; c__Alphaproteobacteria; o__Caulobacterales; f__Hyphomonadaceae; g__SWB02	1
OTU_6914	k__Bacteria; p__Acidobacteriota; c__Acidobacteriae; o__Bryobacterales; f__Bryobacteraceae; g__Bryobacter	1
OTU_6943	k__Bacteria; p__Myxococcota; c__Polyangia; o__Polyangiales; f__Sandaracinaceae; g__; s__	1
OTU_7003	k__Bacteria; p__Acidobacteriota; c__Holophagae; o__Holophagales; f__Holophagaceae	1
OTU_7080	k__Bacteria; p__Planctomycetota; c__Planctomycetes; o__Gemmatales; f__Gemmataceae; g__; s__	1
OTU_7093	k__Bacteria; p__Proteobacteria; c__Alphaproteobacteria; o__Rickettsiales; f__Rickettsiaceae; g__; s__	2
OTU_7131	Unknown	2
OTU_7139	k__Bacteria; p__Planctomycetota; c__Planctomycetes; o__Gemmatales; f__Gemmataceae; g__Gemmata; s__	1
OTU_7291	k__Bacteria; p__Bdellovibrionota; c__Bdellovibrionia; o__Bacteriovoracales; f__Bacteriovoracaceae; g__Peredibacter	2
OTU_7360	k__Bacteria; p__Bacteroidota; c__Bacteroidia	1
OTU_7366	Unknown	1
OTU_7378	k__Bacteria; p__Proteobacteria; c__Gammaproteobacteria; o__Burkholderiales; f__Chitinimonadaceae; g__Chitinivorax; s__	1
OTU_7386	k__Bacteria; p__Bacteroidota; c__Bacteroidia	1
OTU_7395	k__Bacteria; p__Planctomycetota; c__Planctomycetes; o__Gemmatales; f__Gemmataceae; g__; s__	1
OTU_7437	k__Bacteria; p__Planctomycetota; c__Planctomycetes; o__Pirellulales; f__Pirellulaceae; g__Pirellula; s__	2
OTU_7439	k__Bacteria; p__Proteobacteria; c__Gammaproteobacteria	1
OTU_7554	k__Bacteria; p__Planctomycetota; c__Planctomycetes; o__Pirellulales; f__Pirellulaceae; g__Pirellula; s__	1

## Sheet: AlbF.uniq.otu
Table S4. List of common and unique OTUs in each sample category. (k;Kingdom, p;Phylum, c;Class, o;Order, f;Family, g;genus, species;s)
#OTU_number	Taxonomy	Mean sequence count of unique OTU of AlbF group
OTU_1149	k__Bacteria	13
OTU_1397	Unknown	11
OTU_1554	k__Bacteria	10
OTU_1627	k__Bacteria	2
OTU_1629	k__Bacteria	7
OTU_1684	Unknown	7
OTU_1719	k__Bacteria	2
OTU_1832	Unknown	4
OTU_1888	k__Bacteria	6
OTU_1889	Unknown	4		3
OTU_1903	Unknown	4
OTU_1914	Unknown	2
OTU_2016	Unknown	4
OTU_2019	k__Bacteria	3
OTU_2213	k__Bacteria	9
OTU_2242	Unknown	3
OTU_2274	Unknown	3
OTU_2379	k__Bacteria	2
OTU_2390	k__Bacteria	2
OTU_2473	Unknown	3
OTU_2525	Unknown	3
OTU_2546	k__Bacteria	7
OTU_2552	Unknown	4
OTU_2561	Unknown	3
OTU_2609	Unknown	6
OTU_2613	Unknown	10
OTU_2673	k__Bacteria	5
OTU_2682	Unknown	4
OTU_2708	k__Bacteria	2
OTU_2714	Unknown	2
OTU_2792	Unknown	2
OTU_2839	Unknown	5
OTU_2844	Unknown	2
OTU_2860	k__Bacteria	2
OTU_2891	k__Bacteria	3
OTU_2903	k__Bacteria	5
OTU_2934	Unknown	2
OTU_2976	Unknown	2
OTU_3028	k__Bacteria	2
OTU_3048	Unknown	2
OTU_3051	k__Bacteria	2
OTU_3083	Unknown	3
OTU_3167	k__Bacteria; p__Firmicutes; c__Clostridia; o__Oscillospirales	2
OTU_3187	k__Bacteria	2
OTU_3210	k__Bacteria	2
OTU_3221	k__Bacteria	2
OTU_3252	Unknown	1
OTU_3256	Unknown	1
OTU_3274	Unknown	1
OTU_3286	k__Bacteria	1
OTU_3289	k__Bacteria	1
OTU_3292	k__Bacteria; p__Chloroflexi; c__KD4-96; o__KD4-96; f__KD4-96; g__KD4-96; s__	1
OTU_3299	k__Bacteria	1
OTU_3310	k__Bacteria	1
OTU_3405	k__Bacteria	2
OTU_3412	Unknown	1
OTU_3415	Unknown	1
OTU_3423	k__Bacteria	1
OTU_3442	k__Bacteria	2
OTU_3453	Unknown	2
OTU_3457	Unknown	2
OTU_3458	k__Bacteria	1
OTU_3471	Unknown	1
OTU_3474	k__Bacteria; p__Bdellovibrionota; c__Bdellovibrionia; o__Bdellovibrionales; f__Bdellovibrionaceae; g__OM27_clade; s__	1
OTU_3520	k__Bacteria	1
OTU_3523	Unknown	2
OTU_3549	Unknown	1
OTU_3565	k__Bacteria	1
OTU_3620	Unknown	1
OTU_3698	k__Bacteria	3
OTU_3717	k__Bacteria	2
OTU_3721	k__Bacteria	1
OTU_3738	Unknown	1
OTU_3750	Unknown	1
OTU_3755	k__Bacteria	1
OTU_3761	Unknown	2
OTU_3768	Unknown	1
OTU_3788	k__Bacteria	3
OTU_3843	k__Bacteria	1
OTU_3850	k__Bacteria	2
OTU_3857	Unknown	1
OTU_3865	k__Bacteria; p__Verrucomicrobiota; c__Verrucomicrobiae; o__Pedosphaerales; f__Pedosphaeraceae	2
OTU_3877	k__Bacteria	2
OTU_3898	Unknown	2
OTU_3908	k__Bacteria	1
OTU_3912	k__Bacteria	1
OTU_3928	k__Bacteria	1
OTU_3948	Unknown	3
OTU_3964	Unknown	1
OTU_3969	Unknown	1
OTU_3979	Unknown	2
OTU_3998	k__Bacteria	2
OTU_4014	k__Bacteria; p__Firmicutes; c__Clostridia; o__Oscillospirales; f__Ruminococcaceae; g__Ruminococcus	2
OTU_4031	k__Bacteria	2
OTU_4060	Unknown	1
OTU_4069	k__Bacteria	2
OTU_4085	k__Bacteria	1
OTU_4101	Unknown	1
OTU_4111	Unknown	4
OTU_4115	Unknown	1
OTU_4132	k__Bacteria	1
OTU_4150	Unknown	1
OTU_4164	Unknown	2
OTU_4180	k__Bacteria	1
OTU_4215	k__Bacteria	1
OTU_4219	Unknown	2
OTU_4224	Unknown	1
OTU_4244	Unknown	1
OTU_4247	k__Bacteria	1
OTU_4296	Unknown	1
OTU_4302	k__Bacteria	2
OTU_4316	k__Bacteria; p__Spirochaetota; c__Leptospirae; o__Leptospirales; f__Leptospiraceae; g__RBG-16-49-21; s__microbial_mat	1
OTU_4339	k__Bacteria	1
OTU_4349	Unknown	1
OTU_4384	k__Bacteria	1
OTU_4432	k__Bacteria	2
OTU_4449	Unknown	2
OTU_4464	Unknown	2
OTU_4465	Unknown	1
OTU_4472	Unknown	1
OTU_4482	k__Bacteria	1
OTU_4484	Unknown	4
OTU_4614	Unknown	1
OTU_4618	k__Bacteria	1
OTU_4637	Unknown	2
OTU_4642	Unknown	1
OTU_4653	Unknown	1
OTU_4675	k__Bacteria	2
OTU_4688	Unknown	1
OTU_4698	k__Bacteria	2
OTU_4710	Unknown	2
OTU_4725	Unknown	3
OTU_4739	Unknown	2
OTU_4775	k__Bacteria	1
OTU_4782	k__Bacteria	2
OTU_4788	k__Bacteria	1
OTU_4795	k__Bacteria	1
OTU_4805	k__Bacteria; p__Firmicutes	1
OTU_4810	Unknown	1
OTU_4830	Unknown	1
OTU_4886	k__Bacteria	1
OTU_4888	Unknown	1
OTU_4902	k__Bacteria	2
OTU_4906	k__Bacteria	1
OTU_4934	Unknown	2
OTU_4957	Unknown	1
OTU_4959	k__Bacteria	1
OTU_4962	Unknown	1
OTU_4964	Unknown	1
OTU_4973	k__Bacteria	2
OTU_4979	k__Bacteria	3
OTU_4981	Unknown	1
OTU_4983	Unknown	3
OTU_5020	k__Bacteria	1
OTU_5056	k__Bacteria	1
OTU_5062	Unknown	2
OTU_5068	Unknown	1
OTU_5076	k__Bacteria	1
OTU_5079	Unknown	2
OTU_5084	Unknown	1
OTU_5088	k__Bacteria; p__Firmicutes; c__Syntrophomonadia; o__Syntrophomonadales; f__Syntrophomonadaceae	1
OTU_5092	k__Bacteria	1
OTU_5099	Unknown	1
OTU_5121	k__Bacteria; p__Firmicutes; c__Negativicutes; o__Veillonellales-Selenomonadales; f__Sporomusaceae; g__; s__	1
OTU_5136	Unknown	1
OTU_5138	Unknown	1
OTU_5149	k__Bacteria	1
OTU_5174	k__Bacteria	1
OTU_5187	Unknown	1
OTU_5217	k__Bacteria	1
OTU_5223	k__Bacteria	1
OTU_5227	Unknown	1
OTU_5264	Unknown	1
OTU_5268	k__Bacteria	2
OTU_5288	k__Bacteria	1
OTU_5311	Unknown	1
OTU_5316	k__Bacteria	1
OTU_5342	k__Bacteria	1
OTU_5344	Unknown	2
OTU_5387	k__Bacteria	1
OTU_5389	k__Bacteria	1
OTU_5417	k__Bacteria	1
OTU_5427	Unknown	1
OTU_5428	Unknown	1
OTU_5431	Unknown	1
OTU_5462	k__Bacteria	1
OTU_5470	k__Bacteria	1
OTU_5487	k__Bacteria	1
OTU_5488	Unknown	1
OTU_5489	k__Bacteria	1
OTU_5532	Unknown	1
OTU_5544	Unknown	1
OTU_5560	k__Bacteria	1
OTU_5569	k__Bacteria	1
OTU_5571	Unknown	1
OTU_5646	k__Bacteria	1
OTU_5661	k__Bacteria	1
OTU_5676	k__Bacteria	2
OTU_5695	Unknown	1
OTU_5697	k__Bacteria	2
OTU_5706	Unknown	2
OTU_5715	k__Bacteria	2
OTU_5716	Unknown	1
OTU_5726	Unknown	1
OTU_5728	k__Bacteria	1
OTU_5734	Unknown	1
OTU_5745	k__Bacteria	2
OTU_5753	Unknown	1
OTU_5757	k__Bacteria	1
OTU_5791	k__Bacteria	1
OTU_5793	Unknown	1
OTU_5801	k__Bacteria	1
OTU_5821	k__Bacteria	1
OTU_5835	Unknown	1
OTU_5847	Unknown	2
OTU_5855	k__Bacteria	1
OTU_5886	k__Bacteria; p__Bdellovibrionota; c__Bdellovibrionia; o__Bacteriovoracales; f__Bacteriovoracaceae; g__Peredibacter	1
OTU_5889	k__Bacteria	1
OTU_5899	k__Bacteria	1
OTU_5907	k__Bacteria	1
OTU_5913	Unknown	2
OTU_5920	Unknown	1
OTU_5960	k__Bacteria	2
OTU_5961	k__Bacteria	1
OTU_5970	Unknown	1
OTU_5971	k__Bacteria	1
OTU_5995	Unknown	1
OTU_6004	Unknown	1
OTU_6005	Unknown	1
OTU_6022	k__Bacteria	2
OTU_6030	Unknown	8
OTU_6047	Unknown	1
OTU_6053	Unknown	1
OTU_6055	Unknown	1
OTU_6083	k__Bacteria	2
OTU_6092	Unknown	1
OTU_6115	Unknown	1
OTU_6118	k__Bacteria	2
OTU_6151	Unknown	1
OTU_6178	Unknown	1
OTU_6187	k__Bacteria	1
OTU_6199	Unknown	1
OTU_6206	k__Bacteria	1
OTU_6207	k__Bacteria	3
OTU_6210	Unknown	1
OTU_6265	Unknown	1
OTU_6290	k__Bacteria	1
OTU_6319	k__Bacteria	2
OTU_6336	Unknown	1
OTU_6356	Unknown	1
OTU_6371	Unknown	1
OTU_6373	Unknown	1
OTU_6408	Unknown	1
OTU_6414	Unknown	1
OTU_6431	Unknown	1
OTU_6433	Unknown	1
OTU_6446	k__Bacteria	2
OTU_6448	Unknown	1
OTU_6452	Unknown	1
OTU_6472	Unknown	1
OTU_6476	Unknown	1
OTU_6519	Unknown	1
OTU_6536	Unknown	1
OTU_6560	Unknown	3
OTU_6607	k__Bacteria	2
OTU_6631	k__Bacteria	2
OTU_6647	Unknown	3
OTU_6656	Unknown	1
OTU_6659	k__Bacteria	1
OTU_6664	Unknown	1
OTU_6665	k__Bacteria	1
OTU_6670	k__Bacteria; p__Firmicutes; c__Clostridia; o__Lachnospirales; f__Lachnospiraceae	2
OTU_6690	Unknown	1
OTU_6705	Unknown	1
OTU_6707	Unknown	1
OTU_6713	Unknown	1
OTU_6719	Unknown	1
OTU_6728	Unknown	1
OTU_6744	Unknown	1
OTU_6746	Unknown	1
OTU_6754	k__Bacteria	1
OTU_6763	k__Bacteria	2
OTU_6808	Unknown	2
OTU_6817	Unknown	1
OTU_6818	Unknown	1
OTU_6823	k__Bacteria	1
OTU_6832	k__Bacteria	2
OTU_6843	k__Bacteria	1
OTU_6848	k__Bacteria	1
OTU_6849	Unknown	1
OTU_6854	k__Bacteria	1
OTU_6869	Unknown	1
OTU_6873	Unknown	2
OTU_6874	k__Bacteria	1
OTU_6877	k__Bacteria	2
OTU_6902	Unknown	1
OTU_6906	Unknown	1
OTU_6944	Unknown	1
OTU_6978	k__Bacteria	1
OTU_6986	Unknown	1
OTU_6990	k__Bacteria	1
OTU_6994	Unknown	3
OTU_6998	k__Bacteria	1
OTU_7009	Unknown	1
OTU_7032	Unknown	1
OTU_7055	Unknown	1
OTU_7071	k__Bacteria	1
OTU_7074	k__Bacteria	2
OTU_7109	k__Bacteria	1
OTU_7123	k__Bacteria	1
OTU_7129	Unknown	1
OTU_7142	Unknown	3
OTU_7144	k__Bacteria	1
OTU_7177	k__Bacteria	1
OTU_7181	k__Bacteria	1
OTU_7210	k__Bacteria	1
OTU_7240	k__Bacteria	1
OTU_7253	Unknown	1
OTU_7258	Unknown	1
OTU_7260	Unknown	1
OTU_7261	Unknown	1
OTU_7262	k__Bacteria	1
OTU_7265	Unknown	1
OTU_7266	k__Bacteria	1
OTU_7272	Unknown	1
OTU_7296	Unknown	1
OTU_7367	Unknown	1
OTU_7387	k__Bacteria	1
OTU_7408	Unknown	1
OTU_7411	k__Bacteria; p__Cyanobacteria; c__Cyanobacteriia; o__Cyanobacteriales; f__Microcystaceae; g__Pleurocapsa_PCC-7327	1
OTU_7422	Unknown	1
OTU_7432	k__Bacteria; p__Proteobacteria; c__Alphaproteobacteria; o__Rhizobiales; f__Hyphomicrobiaceae; g__Hyphomicrobium	1
OTU_7442	k__Bacteria	1
OTU_7445	k__Bacteria	1
OTU_7471	Unknown	2
OTU_7473	k__Bacteria	1
OTU_7511	Unknown	1
OTU_7517	Unknown	2
OTU_7524	k__Bacteria	1
OTU_7526	Unknown	1
OTU_7575	Unknown	2
OTU_7588	k__Bacteria	1
OTU_7590	Unknown	1
OTU_7601	k__Bacteria	1

## Sheet: AlbL.uniq.otu
Table S4. List of common and unique OTUs in each sample category. (k;Kingdom, p;Phylum, c;Class, o;Order, f;Family, g;genus, species;s)
#OTU_number	Taxonomy	Mean sequence count of unique OTU of AlbL group
OTU_1542	k__Bacteria	5
OTU_1631	Unknown	12
OTU_1936	Unknown	5
OTU_2139	Unknown	3
OTU_2158	k__Bacteria	3
OTU_2186	Unknown	3
OTU_2202	k__Bacteria	2
OTU_2269	Unknown	2
OTU_2354	k__Bacteria	2
OTU_2384	k__Bacteria	4
OTU_2404	k__Bacteria	6
OTU_2466	k__Bacteria	2		180
OTU_2480	Unknown	4
OTU_2507	Unknown	2
OTU_2590	k__Bacteria	4
OTU_2686	k__Bacteria	3
OTU_2719	k__Bacteria	4
OTU_2735	Unknown	4
OTU_2799	k__Bacteria	2
OTU_2826	k__Bacteria	2
OTU_2997	k__Bacteria	2
OTU_3119	Unknown	1
OTU_3141	Unknown	2
OTU_3145	k__Bacteria; p__Verrucomicrobiota; c__Omnitrophia; o__Omnitrophales; f__Omnitrophaceae; g__Candidatus_Omnitrophus; s__	3
OTU_3147	Unknown	3
OTU_3165	Unknown	3
OTU_3194	Unknown	2
OTU_3218	Unknown	2
OTU_3264	Unknown	2
OTU_3300	k__Bacteria	1
OTU_3342	k__Bacteria; p__Bacteroidota; c__Bacteroidia; o__Cytophagales; f__Spirosomaceae; g__Spirosoma	2
OTU_3343	k__Bacteria	1
OTU_3366	k__Bacteria	2
OTU_3446	Unknown	1
OTU_3456	k__Bacteria; p__Proteobacteria; c__Alphaproteobacteria	1
OTU_3464	Unknown	2
OTU_3493	k__Bacteria	2
OTU_3502	k__Bacteria	1
OTU_3532	Unknown	2
OTU_3579	Unknown	1
OTU_3592	Unknown	1
OTU_3627	k__Bacteria; p__Firmicutes; c__Limnochordia	2
OTU_3634	Unknown	2
OTU_3661	Unknown	1
OTU_3694	Unknown	3
OTU_3705	k__Bacteria	1
OTU_3706	k__Bacteria; p__Firmicutes; c__Moorellia; o__Desulfitibacterales; f__Desulfitibacteraceae; g__Desulfitibacter	1
OTU_3794	k__Bacteria; p__Cyanobacteria; c__Cyanobacteriia; o__Chloroplast; f__Chloroplast; g__Chloroplast	4
OTU_3813	k__Bacteria; p__Proteobacteria; c__Gammaproteobacteria; o__Burkholderiales; f__Rhodocyclaceae; g__Azospira; s__	2
OTU_3822	k__Bacteria	2
OTU_3825	k__Bacteria; p__Proteobacteria; c__Gammaproteobacteria; o__Burkholderiales; f__Rhodocyclaceae; g__Sulfuritalea; s__	1
OTU_3836	k__Bacteria	2
OTU_3875	k__Bacteria	2
OTU_3887	k__Bacteria	2
OTU_3942	k__Bacteria; p__Spirochaetota; c__Spirochaetia; o__Spirochaetales; f__Spirochaetaceae; g__; s__	2
OTU_3981	k__Bacteria; p__Proteobacteria; c__Alphaproteobacteria; o__Parvibaculales; f__PS1_clade; g__PS1_clade; s__	2
OTU_3986	Unknown	2
OTU_4038	k__Bacteria	2
OTU_4066	Unknown	2
OTU_4126	k__Bacteria; p__Actinobacteriota; c__Actinobacteria; o__Propionibacteriales; f__Nocardioidaceae; g__Nocardioides; s__	1
OTU_4131	k__Bacteria	3
OTU_4153	k__Bacteria	1
OTU_4186	Unknown	2
OTU_4240	k__Bacteria	1
OTU_4243	Unknown	1
OTU_4265	k__Bacteria; p__Bacteroidota; c__Bacteroidia; o__Sphingobacteriales; f__NS11-12_marine_group; g__NS11-12_marine_group; s__	3
OTU_4268	k__Bacteria	2
OTU_4309	Unknown	1
OTU_4362	Unknown	1
OTU_4368	k__Bacteria	2
OTU_4380	k__Bacteria	1
OTU_4424	k__Bacteria; p__Firmicutes; c__Bacilli; o__Paenibacillales; f__Paenibacillaceae; g__Paenibacillus	2
OTU_4463	Unknown	2
OTU_4470	k__Bacteria	1
OTU_4511	Unknown	1
OTU_4546	Unknown	1
OTU_4548	Unknown	1
OTU_4588	k__Bacteria	1
OTU_4643	Unknown	1
OTU_4666	k__Bacteria	1
OTU_4670	k__Bacteria; p__Proteobacteria; c__Alphaproteobacteria; o__Acetobacterales; f__Acetobacteraceae; g__Acidisoma; s__	1
OTU_4704	k__Bacteria	1
OTU_4719	k__Bacteria	1
OTU_4720	Unknown	2
OTU_4721	k__Bacteria; p__Firmicutes; c__; o__; f__; g__; s__	1
OTU_4742	k__Bacteria	2
OTU_4750	k__Bacteria	1
OTU_4770	Unknown	1
OTU_4842	Unknown	2
OTU_4843	k__Bacteria; p__Chloroflexi; c__Anaerolineae; o__SJA-15; f__SJA-15; g__SJA-15; s__	1
OTU_4923	Unknown	5
OTU_4941	k__Bacteria	1
OTU_5008	k__Bacteria; p__Cyanobacteria; c__Cyanobacteriia; o__Chloroplast; f__Chloroplast; g__Chloroplast	1
OTU_5031	k__Bacteria; p__Chloroflexi; c__Chloroflexia; o__Chloroflexales; f__Roseiflexaceae	2
OTU_5050	Unknown	1
OTU_5112	k__Bacteria	1
OTU_5129	k__Bacteria; p__Cyanobacteria; c__Cyanobacteriia; o__Chloroplast; f__Chloroplast; g__Chloroplast	3
OTU_5135	k__Bacteria	1
OTU_5168	Unknown	1
OTU_5195	Unknown	7
OTU_5215	Unknown	1
OTU_5256	Unknown	1
OTU_5263	k__Bacteria	1
OTU_5322	k__Bacteria	1
OTU_5355	k__Bacteria; p__Verrucomicrobiota; c__Chlamydiae; o__Chlamydiales; f__Simkaniaceae	2
OTU_5384	Unknown	2
OTU_5392	k__Bacteria	1
OTU_5573	Unknown	1
OTU_5581	k__Bacteria; p__Cyanobacteria; c__Cyanobacteriia; o__Chloroplast; f__Chloroplast; g__Chloroplast	1
OTU_5611	k__Bacteria	2
OTU_5615	k__Bacteria	1
OTU_5620	Unknown	1
OTU_5637	k__Bacteria	1
OTU_5639	Unknown	1
OTU_5651	k__Bacteria	1
OTU_5668	k__Bacteria; p__Verrucomicrobiota; c__Verrucomicrobiae; o__Verrucomicrobiales; f__DEV007; g__DEV007; s__	1
OTU_5705	Unknown	1
OTU_5721	Unknown	3
OTU_5724	Unknown	2
OTU_5756	k__Bacteria	1
OTU_5767	k__Bacteria; p__Cyanobacteria; c__Cyanobacteriia; o__Chloroplast; f__Chloroplast; g__Chloroplast; s__Bracteacoccus_minor	1
OTU_5777	Unknown	1
OTU_5852	Unknown	1
OTU_5874	k__Bacteria; p__Actinobacteriota; c__Actinobacteria; o__Propionibacteriales; f__Propionibacteriaceae; g__Microlunatus; s__	1
OTU_5883	k__Bacteria; p__Proteobacteria; c__Alphaproteobacteria; o__Ferrovibrionales; f__Ferrovibrionales; g__; s__	1
OTU_5892	Unknown	1
OTU_5902	k__Bacteria	2
OTU_5979	k__Bacteria	1
OTU_5988	k__Bacteria; p__Cyanobacteria; c__Cyanobacteriia; o__Chloroplast; f__Chloroplast; g__Chloroplast; s__Oscillatoriales_cyanobacterium	2
OTU_6033	k__Bacteria; p__Verrucomicrobiota; c__Verrucomicrobiae; o__Pedosphaerales; f__Pedosphaeraceae; g__DEV114; s__bacterium_enrichment	1
OTU_6052	k__Bacteria	1
OTU_6129	Unknown	2
OTU_6190	k__Bacteria; p__Deferribacterota; c__Deferribacteres; o__Deferribacterales; f__Deferribacteraceae; g__Geovibrio; s__Deferribacterales_bacterium	1
OTU_6227	k__Bacteria	1
OTU_6244	k__Bacteria	2
OTU_6249	Unknown	1
OTU_6289	Unknown	1
OTU_6316	Unknown	2
OTU_6337	k__Bacteria	1
OTU_6400	Unknown	1
OTU_6416	Unknown	1
OTU_6422	Unknown	2
OTU_6435	k__Bacteria	2
OTU_6471	k__Bacteria	2
OTU_6587	Unknown	1
OTU_6610	k__Bacteria; p__Actinobacteriota; c__Actinobacteria; o__Micromonosporales; f__Micromonosporaceae; g__Longispora; s__	1
OTU_6629	k__Bacteria	3
OTU_6725	k__Bacteria	1
OTU_6730	k__Bacteria; p__Cyanobacteria; c__Cyanobacteriia; o__Chloroplast; f__Chloroplast; g__Chloroplast; s__Oscillatoriales_cyanobacterium	1
OTU_6735	Unknown	1
OTU_6769	Unknown	1
OTU_6778	Unknown	1
OTU_6785	Unknown	1
OTU_6794	k__Bacteria; p__Firmicutes; c__Bacilli; o__Bacillales; f__Bacillaceae; g__Amphibacillus	1
OTU_6844	k__Bacteria	1
OTU_6845	k__Bacteria	1
OTU_6885	k__Bacteria	1
OTU_6899	k__Bacteria; p__Firmicutes; c__Bacilli; o__Thermoactinomycetales; f__Thermoactinomycetaceae; g__Novibacillus; s__Novibacillus_thermophilus	2
OTU_6939	k__Bacteria	2
OTU_6941	Unknown	1
OTU_6949	Unknown	1
OTU_6955	k__Bacteria	1
OTU_7023	k__Bacteria	1
OTU_7051	k__Bacteria; p__Bacteroidota; c__Bacteroidia; o__Sphingobacteriales; f__CWT_CU03-E12; g__CWT_CU03-E12; s__	1
OTU_7078	k__Bacteria	1
OTU_7100	k__Bacteria; p__Chloroflexi; c__Chloroflexia; o__Thermomicrobiales; f__JG30-KF-CM45; g__JG30-KF-CM45; s__	1
OTU_7113	Unknown	1
OTU_7114	Unknown	1
OTU_7119	k__Bacteria; p__Firmicutes; c__Clostridia; o__Lachnospirales; f__Lachnospiraceae; g__Epulopiscium; s__	1
OTU_7233	k__Bacteria; p__Bacteroidota; c__Bacteroidia; o__Cytophagales; f__Spirosomaceae; g__Runella	9
OTU_7263	k__Bacteria	1
OTU_7308	Unknown	1
OTU_7374	k__Bacteria; p__Firmicutes	1
OTU_7376	Unknown	1
OTU_7401	k__Bacteria; p__Firmicutes; c__Clostridia; o__Oscillospirales; f__UCG-010; g__UCG-010; s__	1
OTU_7403	k__Bacteria	1
OTU_7450	k__Bacteria	1
OTU_7469	k__Bacteria	1
OTU_7484	k__Bacteria; p__Planctomycetota; c__Planctomycetes; o__Gemmatales; f__Gemmataceae; g__Zavarzinella; s__	1
OTU_7549	k__Bacteria; p__Proteobacteria; c__Alphaproteobacteria; o__Thalassobaculales; f__Thalassobaculaceae; g__Thalassobaculum; s__	1

## Sheet: AlbM.uniq.otu
Table S4. List of common and unique OTUs in each sample category. (k;Kingdom, p;Phylum, c;Class, o;Order, f;Family, g;genus, species;s)
#OTU_number	Taxonomy	Mean sequence count of unique OTU of AlbM group
OTU_314	k__Bacteria	1
OTU_858	Unknown	15
OTU_991	k__Bacteria	11
OTU_1209	Unknown	11
OTU_1412	k__Bacteria	9
OTU_1423	Unknown	1
OTU_1526	k__Bacteria	6
OTU_1558	k__Bacteria	5
OTU_1585	Unknown	5
OTU_1603	k__Bacteria	5
OTU_1696	Unknown	5
OTU_1748	Unknown	5
OTU_1782	k__Bacteria; p__Proteobacteria; c__Gammaproteobacteria; o__Coxiellales; f__Coxiellaceae; g__Coxiella; s__	5
OTU_1830	Unknown	1
OTU_1865	k__Bacteria	6
OTU_1941	k__Bacteria	11
OTU_1946	Unknown	3
OTU_2035	Unknown	4
OTU_2086	Unknown	4
OTU_2108	Unknown	3
OTU_2194	Unknown	2
OTU_2271	Unknown	5
OTU_2272	k__Bacteria	3
OTU_2300	Unknown	2
OTU_2340	Unknown	3
OTU_2376	k__Bacteria	8
OTU_2406	Unknown	3
OTU_2408	k__Bacteria	3
OTU_2456	Unknown	3
OTU_2503	Unknown	2
OTU_2532	Unknown	4
OTU_2545	k__Bacteria	2
OTU_2584	k__Bacteria	5
OTU_2603	Unknown	3
OTU_2634	k__Bacteria	5
OTU_2645	k__Bacteria	2
OTU_2649	Unknown	3
OTU_2687	k__Bacteria	5
OTU_2701	k__Bacteria	2
OTU_2712	Unknown	2
OTU_2745	k__Bacteria; p__Synergistota; c__Synergistia; o__Synergistales; f__Synergistaceae; g__Fretibacterium; s__Synergistales_bacterium	4
OTU_2750	k__Bacteria	2
OTU_2752	k__Bacteria	2
OTU_2759	Unknown	5
OTU_2772	k__Bacteria	3
OTU_2778	k__Bacteria	2
OTU_2798	Unknown	4
OTU_2811	k__Bacteria	2
OTU_2830	k__Bacteria	2
OTU_2831	Unknown	2
OTU_2833	k__Bacteria	2
OTU_2837	Unknown	2
OTU_2849	k__Bacteria	3
OTU_2864	k__Bacteria	2
OTU_2880	Unknown	2
OTU_2906	k__Bacteria	2
OTU_2921	k__Bacteria	3
OTU_2925	k__Bacteria; p__Firmicutes; c__Clostridia; o__Oscillospirales; f__Ruminococcaceae; g__Candidatus_Soleaferrea; s__	2
OTU_2929	Unknown	2
OTU_2945	Unknown	4
OTU_2946	k__Bacteria; p__Spirochaetota; c__Spirochaetia; o__Spirochaetales; f__Spirochaetaceae; g__; s__bioreactor_sludge	1
OTU_2955	Unknown	3
OTU_2957	k__Bacteria	2
OTU_2987	k__Bacteria	2
OTU_2990	k__Bacteria	2
OTU_3015	Unknown	2
OTU_3021	k__Bacteria	2
OTU_3022	Unknown	2
OTU_3031	Unknown	2
OTU_3042	Unknown	2
OTU_3043	Unknown	2
OTU_3086	Unknown	2
OTU_3105	Unknown	2
OTU_3123	k__Bacteria	2
OTU_3125	Unknown	2
OTU_3127	Unknown	2
OTU_3131	k__Bacteria	2
OTU_3132	k__Bacteria	2
OTU_3140	k__Bacteria	2
OTU_3161	k__Bacteria	5
OTU_3173	Unknown	4
OTU_3181	Unknown	2
OTU_3208	k__Bacteria	1
OTU_3211	k__Bacteria	2
OTU_3228	Unknown	2
OTU_3251	Unknown	2
OTU_3258	Unknown	1
OTU_3261	k__Bacteria	3
OTU_3269	k__Bacteria	1
OTU_3275	Unknown	3
OTU_3287	k__Bacteria	1
OTU_3332	k__Bacteria	2
OTU_3334	Unknown	1
OTU_3344	k__Bacteria	2
OTU_3364	k__Bacteria; p__Firmicutes; c__Clostridia; o__Oscillospirales	2
OTU_3376	Unknown	1
OTU_3379	Unknown	4
OTU_3389	k__Bacteria	2
OTU_3394	k__Bacteria	1
OTU_3406	k__Bacteria	2
OTU_3407	k__Bacteria	2
OTU_3418	Unknown	1
OTU_3425	Unknown	3
OTU_3428	k__Bacteria	1
OTU_3429	k__Bacteria	1
OTU_3430	Unknown	2
OTU_3435	k__Bacteria	2
OTU_3452	k__Bacteria	3
OTU_3468	Unknown	1
OTU_3470	Unknown	2
OTU_3483	k__Bacteria	2
OTU_3524	Unknown	2
OTU_3530	k__Bacteria	2
OTU_3535	k__Bacteria	1
OTU_3547	Unknown	1
OTU_3548	Unknown	1
OTU_3563	Unknown	1
OTU_3575	Unknown	1
OTU_3581	k__Bacteria; p__Actinobacteriota; c__Actinobacteria; o__Frankiales; f__Acidothermaceae; g__Acidothermus; s__	2
OTU_3590	Unknown	2
OTU_3599	k__Bacteria	1
OTU_3613	Unknown	2
OTU_3625	Unknown	2
OTU_3626	Unknown	1
OTU_3629	k__Bacteria	2
OTU_3633	Unknown	1
OTU_3646	k__Bacteria	1
OTU_3651	k__Bacteria; p__Bacteroidota; c__Bacteroidia; o__Bacteroidales; f__Prevotellaceae; g__Prevotellaceae_UCG-003; s__	1
OTU_3677	k__Bacteria	2
OTU_3685	Unknown	2
OTU_3688	k__Bacteria	2
OTU_3697	k__Bacteria	2
OTU_3703	k__Bacteria	2
OTU_3714	Unknown	2
OTU_3725	k__Bacteria	3
OTU_3731	k__Bacteria	1
OTU_3766	k__Bacteria	2
OTU_3775	Unknown	1
OTU_3777	Unknown	1
OTU_3804	Unknown	2
OTU_3819	k__Bacteria	2
OTU_3824	k__Bacteria; p__Proteobacteria; c__Gammaproteobacteria; o__Burkholderiales; f__Nitrosomonadaceae; g__MND1; s__	2
OTU_3848	Unknown	2
OTU_3861	Unknown	2
OTU_3891	k__Bacteria	1
OTU_3909	k__Bacteria; p__Latescibacterota; c__Latescibacterota; o__Latescibacterota; f__Latescibacterota; g__Latescibacterota; s__	1
OTU_3910	Unknown	2
OTU_3941	k__Bacteria	1
OTU_3960	k__Bacteria	1
OTU_3976	Unknown	2
OTU_3977	Unknown	2
OTU_3984	k__Bacteria	1
OTU_3991	Unknown	3
OTU_4001	k__Bacteria	2
OTU_4008	Unknown	2
OTU_4025	Unknown	2
OTU_4040	Unknown	1
OTU_4045	Unknown	3
OTU_4050	k__Bacteria; p__Firmicutes; c__Clostridia; o__Christensenellales; f__Christensenellaceae	1
OTU_4071	Unknown	1
OTU_4082	k__Bacteria	2
OTU_4084	Unknown	2
OTU_4102	Unknown	2
OTU_4105	Unknown	1
OTU_4106	k__Bacteria	1
OTU_4108	k__Bacteria	3
OTU_4123	k__Bacteria; p__Firmicutes; c__Clostridia; o__Clostridia_UCG-014; f__Clostridia_UCG-014; g__Clostridia_UCG-014; s__	1
OTU_4127	k__Bacteria	2
OTU_4137	Unknown	2
OTU_4139	k__Bacteria	2
OTU_4167	k__Bacteria	2
OTU_4168	k__Bacteria	2
OTU_4184	Unknown	3
OTU_4218	k__Bacteria	1
OTU_4222	Unknown	1
OTU_4226	Unknown	2
OTU_4227	k__Bacteria	2
OTU_4238	k__Bacteria	3
OTU_4246	k__Bacteria	1
OTU_4255	Unknown	1
OTU_4260	Unknown	5
OTU_4267	Unknown	1
OTU_4280	Unknown	1
OTU_4315	k__Bacteria	1
OTU_4325	k__Bacteria	1
OTU_4394	k__Bacteria	2
OTU_4395	Unknown	1
OTU_4406	Unknown	2
OTU_4411	k__Bacteria; p__Firmicutes; c__Bacilli; o__Erysipelotrichales; f__Erysipelatoclostridiaceae; g__UCG-004	1
OTU_4430	k__Bacteria	1
OTU_4435	k__Bacteria	1
OTU_4450	k__Bacteria	1
OTU_4468	k__Bacteria	1
OTU_4485	Unknown	1
OTU_4497	k__Bacteria	1
OTU_4502	Unknown	1
OTU_4558	Unknown	1
OTU_4559	Unknown	1
OTU_4583	k__Bacteria	1
OTU_4584	Unknown	2
OTU_4591	k__Bacteria	1
OTU_4605	k__Bacteria	1
OTU_4606	k__Bacteria	1
OTU_4607	k__Bacteria	1
OTU_4610	Unknown	1
OTU_4627	Unknown	1
OTU_4628	k__Bacteria	2
OTU_4658	Unknown	1
OTU_4659	k__Bacteria	1
OTU_4665	Unknown	1
OTU_4693	k__Bacteria	1
OTU_4694	k__Bacteria	1
OTU_4700	Unknown	1
OTU_4712	k__Bacteria	1
OTU_4733	k__Bacteria	1
OTU_4740	Unknown	1
OTU_4758	k__Bacteria	1
OTU_4771	k__Bacteria	1
OTU_4779	k__Bacteria	1
OTU_4784	k__Bacteria	1
OTU_4791	k__Bacteria	1
OTU_4806	k__Bacteria	2
OTU_4829	k__Bacteria	1
OTU_4831	Unknown	1
OTU_4833	Unknown	2
OTU_4838	Unknown	1
OTU_4873	k__Bacteria	1
OTU_4874	k__Bacteria	2
OTU_4893	Unknown	2
OTU_4911	Unknown	1
OTU_4925	Unknown	1
OTU_4932	k__Bacteria; p__Verrucomicrobiota; c__Verrucomicrobiae; o__Verrucomicrobiales; f__Verrucomicrobiaceae; g__Verrucomicrobium; s__Verrucomicrobium_spinosum	1
OTU_4936	k__Bacteria	1
OTU_4943	Unknown	1
OTU_4945	k__Bacteria	1
OTU_4949	Unknown	1
OTU_4950	k__Bacteria	1
OTU_4951	Unknown	1
OTU_4952	k__Bacteria	1
OTU_4955	k__Bacteria	1
OTU_4987	k__Bacteria	1
OTU_4990	k__Bacteria	1
OTU_4994	k__Bacteria	2
OTU_5018	k__Bacteria	2
OTU_5019	Unknown	5
OTU_5022	Unknown	2
OTU_5039	Unknown	1
OTU_5055	Unknown	1
OTU_5064	k__Bacteria	1
OTU_5073	k__Bacteria	1
OTU_5125	k__Bacteria; p__Firmicutes; c__; o__; f__; g__; s__bacterium_MB7-1	1
OTU_5128	k__Bacteria; p__Firmicutes; c__Clostridia; o__Lachnospirales; f__Lachnospiraceae	1
OTU_5131	Unknown	1
OTU_5139	k__Bacteria	1
OTU_5146	k__Bacteria	2
OTU_5147	Unknown	1
OTU_5150	Unknown	1
OTU_5153	k__Bacteria; p__Firmicutes; c__Clostridia; o__Peptostreptococcales-Tissierellales; f__Peptostreptococcales-Tissierellales; g__Guggenheimella; s__	2
OTU_5175	k__Bacteria	1
OTU_5177	k__Bacteria; p__Bacteroidota; c__Bacteroidia; o__Chitinophagales; f__Chitinophagaceae; g__Taibaiella	1
OTU_5178	Unknown	1
OTU_5179	k__Bacteria	1
OTU_5184	k__Bacteria	2
OTU_5189	k__Bacteria	1
OTU_5192	Unknown	1
OTU_5193	k__Bacteria	1
OTU_5210	k__Bacteria	2
OTU_5229	k__Bacteria	2
OTU_5262	k__Bacteria	3
OTU_5275	Unknown	1
OTU_5287	k__Bacteria	1
OTU_5300	Unknown	1
OTU_5302	k__Bacteria	1
OTU_5315	Unknown	1
OTU_5323	Unknown	1
OTU_5341	k__Bacteria	1
OTU_5346	k__Bacteria	1
OTU_5360	k__Bacteria	1
OTU_5362	Unknown	1
OTU_5397	k__Bacteria	2
OTU_5398	k__Bacteria	2
OTU_5400	Unknown	1
OTU_5407	k__Bacteria	2
OTU_5420	Unknown	1
OTU_5432	k__Bacteria	2
OTU_5438	Unknown	1
OTU_5482	Unknown	1
OTU_5484	k__Bacteria	1
OTU_5510	k__Bacteria	2
OTU_5511	Unknown	2
OTU_5521	Unknown	1
OTU_5526	k__Bacteria; p__Bdellovibrionota; c__Oligoflexia; o__Oligoflexales; f__; g__; s__	1
OTU_5541	k__Bacteria; p__Firmicutes; c__Clostridia; o__Peptostreptococcales-Tissierellales; f__Proteiniboraceae; g__Proteiniborus; s__	2
OTU_5548	Unknown	1
OTU_5554	Unknown	1
OTU_5556	k__Bacteria	1
OTU_5567	k__Bacteria	1
OTU_5582	k__Bacteria	1
OTU_5586	k__Bacteria	1
OTU_5609	k__Bacteria	1
OTU_5624	k__Bacteria	1
OTU_5632	k__Bacteria; p__Acidobacteriota; c__Holophagae; o__Subgroup_7; f__Subgroup_7; g__Subgroup_7; s__	1
OTU_5649	k__Bacteria	1
OTU_5662	k__Bacteria	1
OTU_5674	k__Bacteria; p__Firmicutes; c__Clostridia; o__Lachnospirales	1
OTU_5751	k__Bacteria	2
OTU_5754	Unknown	1
OTU_5758	Unknown	1
OTU_5764	k__Bacteria	1
OTU_5771	k__Bacteria	2
OTU_5776	k__Bacteria	1
OTU_5783	Unknown	1
OTU_5788	k__Bacteria	1
OTU_5798	Unknown	1
OTU_5818	Unknown	1
OTU_5860	Unknown	1
OTU_5870	k__Bacteria	1
OTU_5871	Unknown	1
OTU_5888	k__Bacteria	1
OTU_5904	Unknown	1
OTU_5906	k__Bacteria	2
OTU_5912	k__Bacteria	1
OTU_5916	k__Bacteria	1
OTU_5919	k__Bacteria	1
OTU_5927	k__Bacteria; p__Firmicutes; c__Bacilli; o__Mycoplasmatales; f__Mycoplasmataceae; g__; s__	2
OTU_5938	k__Bacteria	1
OTU_5948	k__Bacteria	1
OTU_5958	Unknown	2
OTU_5983	Unknown	1
OTU_5993	k__Bacteria	1
OTU_6008	k__Bacteria	1
OTU_6010	k__Bacteria	1
OTU_6026	k__Bacteria	1
OTU_6060	Unknown	1
OTU_6062	Unknown	1
OTU_6070	k__Bacteria	1
OTU_6089	Unknown	1
OTU_6095	k__Bacteria	1
OTU_6105	Unknown	1
OTU_6121	k__Bacteria	2
OTU_6153	Unknown	1
OTU_6154	k__Bacteria	2
OTU_6158	k__Bacteria	1
OTU_6202	k__Bacteria	1
OTU_6208	k__Bacteria	1
OTU_6221	k__Bacteria	1
OTU_6237	Unknown	1
OTU_6241	k__Bacteria	2
OTU_6252	k__Bacteria	1
OTU_6258	k__Bacteria	1
OTU_6259	k__Bacteria	1
OTU_6266	k__Bacteria	2
OTU_6267	Unknown	1
OTU_6270	k__Bacteria	1
OTU_6273	Unknown	1
OTU_6274	k__Bacteria	1
OTU_6277	Unknown	1
OTU_6293	Unknown	1
OTU_6306	k__Bacteria	1
OTU_6312	k__Bacteria	2
OTU_6313	Unknown	1
OTU_6315	k__Bacteria	1
OTU_6329	Unknown	2
OTU_6331	k__Bacteria	1
OTU_6332	Unknown	1
OTU_6338	Unknown	1
OTU_6339	Unknown	2
OTU_6354	Unknown	2
OTU_6357	Unknown	1
OTU_6362	k__Bacteria	1
OTU_6370	Unknown	1
OTU_6372	k__Bacteria	1
OTU_6378	Unknown	2
OTU_6396	k__Bacteria	1
OTU_6397	k__Bacteria; p__Chloroflexi; c__Chloroflexia; o__Thermomicrobiales; f__JG30-KF-CM45; g__JG30-KF-CM45; s__	1
OTU_6421	k__Bacteria	2
OTU_6424	k__Bacteria; p__Gemmatimonadota; c__Longimicrobia; o__Longimicrobiales; f__Longimicrobiaceae; g__Longimicrobium; s__	2
OTU_6426	Unknown	1
OTU_6447	Unknown	1
OTU_6460	k__Bacteria	1
OTU_6464	k__Bacteria; p__Bacteroidota; c__Bacteroidia; o__Bacteroidales; f__Muribaculaceae; g__Muribaculaceae; s__	1
OTU_6467	k__Bacteria	1
OTU_6490	k__Bacteria	1
OTU_6504	k__Bacteria	2
OTU_6509	k__Bacteria	1
OTU_6513	k__Bacteria	2
OTU_6514	k__Bacteria	1
OTU_6535	k__Bacteria	1
OTU_6544	Unknown	1
OTU_6548	Unknown	1
OTU_6563	Unknown	1
OTU_6565	k__Bacteria	1
OTU_6566	k__Bacteria; p__Chloroflexi; c__Anaerolineae; o__Anaerolineales; f__Anaerolineaceae; g__Flexilinea	3
OTU_6583	k__Bacteria; p__Firmicutes	1
OTU_6584	k__Bacteria; p__Firmicutes; c__Clostridia; o__Lachnospirales; f__Lachnospiraceae; g__Tyzzerella; s__bacterium_NLAE-zl-C441	1
OTU_6591	k__Bacteria	1
OTU_6603	k__Bacteria; p__Proteobacteria; c__Alphaproteobacteria	1
OTU_6621	k__Bacteria	2
OTU_6643	k__Bacteria	2
OTU_6653	Unknown	1
OTU_6666	k__Bacteria	2
OTU_6671	k__Bacteria	2
OTU_6681	Unknown	1
OTU_6711	k__Bacteria	1
OTU_6721	Unknown	1
OTU_6727	Unknown	1
OTU_6749	k__Bacteria	1
OTU_6758	Unknown	2
OTU_6766	Unknown	1
OTU_6768	k__Bacteria; p__Firmicutes; c__Dethiobacteria; o__Dethiobacterales; f__Dethiobacteraceae; g__Dethiobacter	2
OTU_6784	Unknown	1
OTU_6795	k__Bacteria	1
OTU_6797	k__Bacteria	1
OTU_6799	Unknown	1
OTU_6801	Unknown	1
OTU_6839	k__Bacteria	1
OTU_6840	Unknown	2
OTU_6841	Unknown	1
OTU_6876	Unknown	1
OTU_6880	Unknown	2
OTU_6891	k__Bacteria	1
OTU_6897	k__Bacteria	1
OTU_6907	Unknown	1
OTU_6930	k__Bacteria	1
OTU_6932	k__Bacteria	1
OTU_6952	Unknown	1
OTU_6957	Unknown	1
OTU_6960	Unknown	1
OTU_6962	Unknown	1
OTU_6966	Unknown	2
OTU_6980	k__Bacteria	2
OTU_6985	k__Bacteria	2
OTU_7002	k__Bacteria	1
OTU_7013	Unknown	1
OTU_7015	Unknown	1
OTU_7018	k__Bacteria	1
OTU_7024	Unknown	1
OTU_7046	k__Bacteria; p__Acidobacteriota; c__Blastocatellia; o__Pyrinomonadales; f__Pyrinomonadaceae; g__RB41; s__	1
OTU_7070	k__Bacteria	1
OTU_7075	Unknown	1
OTU_7126	k__Bacteria	2
OTU_7150	Unknown	1
OTU_7152	k__Bacteria	1
OTU_7164	Unknown	1
OTU_7176	k__Bacteria	1
OTU_7179	k__Bacteria	3
OTU_7214	Unknown	1
OTU_7218	k__Bacteria	2
OTU_7234	Unknown	1
OTU_7244	k__Bacteria	1
OTU_7249	Unknown	1
OTU_7252	k__Bacteria	1
OTU_7255	Unknown	4
OTU_7259	k__Bacteria	1
OTU_7264	Unknown	1
OTU_7267	k__Bacteria	2
OTU_7281	k__Bacteria	1
OTU_7307	k__Bacteria; p__Firmicutes; c__Clostridia	1
OTU_7309	k__Bacteria	1
OTU_7313	Unknown	1
OTU_7314	Unknown	1
OTU_7318	Unknown	1
OTU_7324	k__Bacteria	1
OTU_7326	k__Bacteria; p__Proteobacteria	1
OTU_7328	k__Bacteria	1
OTU_7336	Unknown	1
OTU_7361	Unknown	1
OTU_7377	k__Bacteria; p__Firmicutes	1
OTU_7405	Unknown	1
OTU_7416	k__Bacteria	2
OTU_7426	k__Bacteria; p__Actinobacteriota; c__Actinobacteria; o__Micrococcales; f__Micrococcaceae; g__Nesterenkonia; s__bacterium_K2-78	1
OTU_7430	Unknown	1
OTU_7431	k__Bacteria	2
OTU_7444	Unknown	1
OTU_7447	Unknown	1
OTU_7457	Unknown	1
OTU_7458	k__Bacteria	2
OTU_7479	k__Bacteria	1
OTU_7495	k__Bacteria; p__Firmicutes; c__Clostridia; o__Oscillospirales; f__Oscillospiraceae; g__NK4A214_group; s__	1
OTU_7498	Unknown	1
OTU_7518	Unknown	1
OTU_7529	Unknown	1
OTU_7533	Unknown	1
OTU_7540	k__Bacteria	1
OTU_7551	Unknown	2
OTU_7562	Unknown	1
OTU_7569	k__Bacteria	1
OTU_7582	Unknown	1
OTU_7596	k__Bacteria; p__Firmicutes; c__Clostridia; o__Oscillospirales; f__Oscillospiraceae	1

## Sheet: AlbW.uniq.otu
Table S4. List of common and unique OTUs in each sample category. (k;Kingdom, p;Phylum, c;Class, o;Order, f;Family, g;genus, species;s)
#OTU_number	Taxonomy	Mean sequence count of unique OTU of AlbW group
OTU_473	k__Bacteria; p__Firmicutes; c__Bacilli; o__Mycoplasmatales; f__Mycoplasmataceae; g__Mycoplasma; s__Mycoplasma_moatsii	76
OTU_652	k__Bacteria; p__Bdellovibrionota; c__Bdellovibrionia; o__Bdellovibrionales; f__Bdellovibrionaceae; g__Bdellovibrio; s__	48
OTU_815	k__Bacteria; p__Firmicutes; c__Bacilli; o__Lactobacillales; f__Lactobacillaceae; g__Lactobacillus; s__Lactobacillus_curvatus	1
OTU_853	k__Bacteria; p__Bacteroidota; c__Bacteroidia; o__Chitinophagales; f__Saprospiraceae; g__; s__	40
OTU_878	k__Bacteria; p__Sumerlaeota; c__Sumerlaeia; o__Sumerlaeales; f__Sumerlaeaceae; g__Sumerlaea; s__	31
OTU_902	k__Bacteria; p__Proteobacteria; c__Gammaproteobacteria; o__Burkholderiales; f__Nitrosomonadaceae; g__IS-44; s__	27
OTU_928	k__Bacteria	21
OTU_1011	k__Bacteria; p__Proteobacteria; c__Alphaproteobacteria; o__Reyranellales; f__Reyranellaceae; g__; s__	20
OTU_1101	k__Bacteria; p__Proteobacteria; c__Gammaproteobacteria; o__Burkholderiales; f__SC-I-84; g__SC-I-84; s__	20
OTU_1122	k__Bacteria; p__Proteobacteria; c__Gammaproteobacteria; o__Diplorickettsiales; f__Diplorickettsiaceae; g__Aquicella; s__	17						3
OTU_1128	k__Bacteria; p__Acidobacteriota; c__Vicinamibacteria; o__Vicinamibacterales; f__; g__; s__	18
OTU_1152	k__Bacteria; p__Bacteroidota; c__Bacteroidia; o__Cytophagales; f__Microscillaceae; g__Ohtaekwangia; s__	20
OTU_1210	k__Bacteria; p__Gemmatimonadota; c__Gemmatimonadetes; o__Gemmatimonadales; f__Gemmatimonadaceae; g__; s__	15
OTU_1312	k__Bacteria; p__Spirochaetota; c__Spirochaetia; o__Spirochaetales; f__Spirochaetaceae; g__Treponema	13
OTU_1398	k__Bacteria; p__Proteobacteria; c__Gammaproteobacteria; o__Ectothiorhodospirales; f__Thioalkalispiraceae; g__; s__	11
OTU_1475	k__Bacteria; p__SAR324_clade(Marine_group_B); c__SAR324_clade(Marine_group_B); o__SAR324_clade(Marine_group_B); f__SAR324_clade(Marine_group_B); g__SAR324_clade(Marine_group_B); s__	14
OTU_1517	k__Bacteria; p__Proteobacteria; c__Gammaproteobacteria; o__Steroidobacterales; f__Steroidobacteraceae; g__; s__	9
OTU_1559	k__Bacteria; p__Patescibacteria; c__Gracilibacteria; o__Gracilibacteria; f__Gracilibacteria; g__Gracilibacteria; s__Gracilibacteria_bacterium	8
OTU_1620	k__Bacteria; p__Proteobacteria; c__Alphaproteobacteria; o__; f__; g__; s__	9
OTU_1646	k__Bacteria; p__SAR324_clade(Marine_group_B); c__SAR324_clade(Marine_group_B); o__SAR324_clade(Marine_group_B); f__SAR324_clade(Marine_group_B); g__SAR324_clade(Marine_group_B); s__	11
OTU_1653	k__Bacteria; p__Myxococcota; c__Polyangia; o__Polyangiales; f__Sandaracinaceae; g__; s__	7
OTU_1716	k__Bacteria; p__Acidobacteriota; c__Vicinamibacteria; o__Vicinamibacterales; f__; g__; s__	7
OTU_1727	k__Bacteria; p__Proteobacteria; c__Gammaproteobacteria	4
OTU_1757	k__Bacteria; p__Actinobacteriota; c__Acidimicrobiia; o__IMCC26256; f__IMCC26256; g__IMCC26256; s__	6
OTU_1805	k__Bacteria; p__Firmicutes; c__Bacilli; o__Lactobacillales; f__Streptococcaceae; g__Streptococcus	8
OTU_1837	k__Bacteria; p__Gemmatimonadota; c__Gemmatimonadetes; o__Gemmatimonadales; f__Gemmatimonadaceae; g__; s__	6
OTU_1848	k__Bacteria; p__Bdellovibrionota; c__Bdellovibrionia; o__Bdellovibrionales; f__Bdellovibrionaceae; g__OM27_clade; s__	7
OTU_2006	k__Bacteria; p__Proteobacteria; c__Gammaproteobacteria; o__Burkholderiales; f__Chitinibacteraceae; g__Chitinilyticum; s__Chitinilyticum_litopenaei	9
OTU_2101	k__Bacteria; p__Acidobacteriota; c__Vicinamibacteria; o__Vicinamibacterales; f__; g__; s__	9
OTU_2110	k__Bacteria; p__Acidobacteriota; c__Acidobacteriae; o__Acidobacteriae; f__Acidobacteriae; g__Paludibaculum; s__	5
OTU_2155	k__Bacteria; p__Verrucomicrobiota; c__Verrucomicrobiae; o__Verrucomicrobiales; f__Rubritaleaceae; g__Luteolibacter; s__	5
OTU_2173	k__Bacteria; p__Verrucomicrobiota; c__Verrucomicrobiae; o__Chthoniobacterales; f__Chthoniobacteraceae; g__Chthoniobacter; s__	1
OTU_2196	k__Bacteria; p__Bacteroidota; c__Bacteroidia; o__Chitinophagales; f__37-13; g__37-13; s__	8
OTU_2224	k__Bacteria; p__Bdellovibrionota; c__Oligoflexia; o__0319-6G20; f__0319-6G20; g__0319-6G20; s__	5
OTU_2246	k__Bacteria; p__Acidobacteriota; c__Vicinamibacteria; o__Vicinamibacterales; f__; g__; s__	9
OTU_2419	k__Bacteria; p__Patescibacteria; c__Saccharimonadia; o__Saccharimonadales; f__Saccharimonadales; g__Saccharimonadales; s__	3
OTU_2433	k__Bacteria; p__Verrucomicrobiota; c__Verrucomicrobiae; o__Pedosphaerales; f__Pedosphaeraceae; g__Pedosphaeraceae; s__	3
OTU_2482	k__Bacteria; p__Proteobacteria; c__Gammaproteobacteria; o__Gammaproteobacteria_Incertae_Sedis; f__Unknown_Family; g__; s__	3
OTU_2483	k__Bacteria; p__Proteobacteria; c__Gammaproteobacteria; o__Burkholderiales; f__SC-I-84; g__SC-I-84; s__	3
OTU_2492	k__Bacteria; p__Chloroflexi; c__OLB14; o__OLB14; f__OLB14; g__OLB14; s__	4
OTU_2524	k__Bacteria; p__Myxococcota; c__Polyangia; o__UASB-TL25; f__UASB-TL25; g__UASB-TL25; s__	4
OTU_2542	k__Bacteria; p__Acidobacteriota; c__Vicinamibacteria; o__Vicinamibacterales; f__; g__; s__	9
OTU_2581	k__Bacteria	4
OTU_2591	k__Bacteria; p__Verrucomicrobiota; c__Verrucomicrobiae; o__Opitutales; f__Opitutaceae; g__Lacunisphaera	3
OTU_2623	k__Bacteria; p__Planctomycetota; c__Planctomycetes; o__Pirellulales; f__Pirellulaceae; g__Pirellula; s__	3
OTU_2674	k__Bacteria; p__Proteobacteria; c__Gammaproteobacteria; o__Steroidobacterales; f__Steroidobacteraceae; g__Steroidobacter; s__	7
OTU_2690	k__Bacteria; p__Desulfobacterota; c__Desulfuromonadia; o__PB19; f__PB19; g__PB19; s__	1
OTU_2692	k__Bacteria; p__Chloroflexi; c__Anaerolineae; o__RBG-13-54-9; f__RBG-13-54-9; g__RBG-13-54-9; s__	5
OTU_2717	k__Bacteria; p__Actinobacteriota; c__Coriobacteriia; o__OPB41; f__OPB41; g__OPB41; s__	1
OTU_2726	k__Bacteria; p__Acidobacteriota; c__Acidobacteriae; o__Acidobacteriae; f__Acidobacteriae; g__Paludibaculum; s__	1
OTU_2730	k__Bacteria; p__Verrucomicrobiota; c__Verrucomicrobiae; o__Opitutales; f__Opitutaceae	3
OTU_2734	k__Bacteria; p__Actinobacteriota; c__Acidimicrobiia; o__; f__; g__; s__bacterium_YC-LK-LKJ4	7
OTU_2754	k__Bacteria; p__Proteobacteria; c__Gammaproteobacteria; o__Steroidobacterales; f__Steroidobacteraceae; g__; s__	5
OTU_2769	k__Bacteria; p__Planctomycetota; c__Planctomycetes; o__Gemmatales; f__Gemmataceae; g__; s__	2
OTU_2777	k__Bacteria; p__Chloroflexi; c__KD4-96; o__KD4-96; f__KD4-96; g__KD4-96; s__	5
OTU_2796	k__Bacteria; p__Proteobacteria; c__Gammaproteobacteria; o__Legionellales; f__Legionellaceae; g__Legionella; s__	3
OTU_2806	k__Bacteria; p__Firmicutes; c__Bacilli; o__Bacillales; f__Bacillaceae; g__Geobacillus; s__Parageobacillus_toebii	4
OTU_2875	k__Bacteria; p__Verrucomicrobiota; c__Verrucomicrobiae; o__Chthoniobacterales; f__Chthoniobacteraceae; g__Chthoniobacter; s__	7
OTU_2896	k__Bacteria; p__Chloroflexi; c__Chloroflexia; o__Chloroflexales; f__Roseiflexaceae	2
OTU_2913	k__Bacteria; p__Verrucomicrobiota; c__Verrucomicrobiae; o__Chthoniobacterales; f__Chthoniobacteraceae; g__Candidatus_Udaeobacter; s__Verrucomicrobia_bacterium	4
OTU_2944	k__Bacteria; p__Proteobacteria; c__Gammaproteobacteria; o__Burkholderiales; f__Rhodocyclaceae; g__Sulfuritalea; s__	1
OTU_2947	k__Bacteria; p__Myxococcota; c__Polyangia; o__Haliangiales; f__Haliangiaceae; g__Haliangium; s__	3
OTU_2950	k__Bacteria; p__Acidobacteriota; c__Vicinamibacteria; o__Vicinamibacterales; f__; g__; s__	7
OTU_2959	k__Bacteria; p__Firmicutes; c__Bacilli; o__Bacillales; f__Bacillaceae	3
OTU_2975	k__Bacteria; p__Acidobacteriota; c__Vicinamibacteria; o__Vicinamibacterales; f__Vicinamibacteraceae; g__Vicinamibacteraceae; s__	11
OTU_3001	k__Bacteria; p__Proteobacteria; c__Gammaproteobacteria; o__Legionellales; f__Legionellaceae; g__Legionella; s__	6
OTU_3061	k__Bacteria; p__Bacteroidota; c__Bacteroidia; o__Chitinophagales; f__Saprospiraceae; g__; s__	3
OTU_3077	k__Bacteria; p__Proteobacteria; c__Alphaproteobacteria	3
OTU_3118	k__Bacteria; p__Spirochaetota; c__Spirochaetia; o__Spirochaetales; f__Spirochaetaceae; g__Spirochaeta_2; s__Spirochaeta_sp.	3
OTU_3150	k__Bacteria; p__Verrucomicrobiota; c__Verrucomicrobiae; o__Opitutales; f__Opitutaceae; g__Lacunisphaera	4
OTU_3152	k__Bacteria; p__Proteobacteria; c__Alphaproteobacteria; o__Rhizobiales	2
OTU_3164	k__Bacteria; p__Verrucomicrobiota; c__Verrucomicrobiae; o__Chthoniobacterales; f__Chthoniobacteraceae; g__Chthoniobacter; s__	5
OTU_3184	k__Bacteria; p__Patescibacteria; c__Parcubacteria	3
OTU_3202	k__Bacteria; p__Verrucomicrobiota; c__Verrucomicrobiae; o__Pedosphaerales; f__Pedosphaeraceae; g__DEV008; s__	4
OTU_3249	Unknown	1
OTU_3271	Unknown	1
OTU_3312	k__Bacteria; p__Proteobacteria; c__Alphaproteobacteria; o__Rhizobiales; f__KF-JG30-B3; g__KF-JG30-B3; s__	5
OTU_3313	k__Bacteria; p__Proteobacteria; c__Alphaproteobacteria; o__Caulobacterales; f__Hyphomonadaceae; g__SWB02; s__	2
OTU_3320	k__Bacteria; p__Acidobacteriota; c__Vicinamibacteria; o__Vicinamibacterales; f__; g__; s__	3
OTU_3323	Unknown	1
OTU_3333	k__Bacteria; p__Proteobacteria; c__Gammaproteobacteria; o__Pasteurellales; f__Pasteurellaceae; g__Haemophilus; s__Haemophilus_sp.	4
OTU_3335	k__Bacteria; p__Cyanobacteria; c__Vampirivibrionia; o__Obscuribacterales; f__Obscuribacteraceae; g__Obscuribacteraceae; s__	4
OTU_3336	k__Bacteria; p__Proteobacteria; c__Gammaproteobacteria; o__KI89A_clade; f__KI89A_clade; g__KI89A_clade; s__	2
OTU_3348	Unknown	1
OTU_3354	Unknown	1
OTU_3396	k__Bacteria; p__Proteobacteria; c__Alphaproteobacteria	3
OTU_3416	Unknown	1
OTU_3427	k__Bacteria	3
OTU_3440	k__Bacteria; p__Acidobacteriota; c__Holophagae; o__Subgroup_7; f__Subgroup_7; g__Subgroup_7; s__	4
OTU_3488	k__Bacteria; p__Planctomycetota; c__Phycisphaerae; o__Tepidisphaerales; f__WD2101_soil_group; g__WD2101_soil_group; s__	2
OTU_3495	k__Bacteria; p__Acidobacteriota; c__Acidobacteriae; o__Bryobacterales; f__Bryobacteraceae; g__Bryobacter; s__	4
OTU_3498	k__Bacteria; p__Proteobacteria; c__Alphaproteobacteria; o__Micavibrionales; f__; g__; s__bacterium_enrichment	3
OTU_3509	k__Bacteria; p__Actinobacteriota; c__Acidimicrobiia; o__Microtrichales; f__Ilumatobacteraceae; g__; s__	7
OTU_3522	k__Bacteria; p__Acidobacteriota; c__Vicinamibacteria; o__Vicinamibacterales; f__; g__; s__	3
OTU_3570	k__Bacteria; p__Actinobacteriota; c__Actinobacteria	3
OTU_3595	k__Bacteria	1
OTU_3602	k__Bacteria; p__Bacteroidota; c__Bacteroidia; o__Chitinophagales; f__Chitinophagaceae; g__Dinghuibacter; s__	1
OTU_3615	k__Bacteria; p__Proteobacteria; c__Gammaproteobacteria	3
OTU_3664	k__Bacteria; p__Planctomycetota; c__Planctomycetes; o__Gemmatales; f__Gemmataceae; g__Fimbriiglobus; s__	2
OTU_3665	k__Bacteria; p__Bacteroidota; c__Bacteroidia; o__Cytophagales; f__Microscillaceae; g__Ohtaekwangia	2
OTU_3693	k__Bacteria; p__Chloroflexi; c__Anaerolineae; o__Anaerolineales; f__Anaerolineaceae; g__Longilinea; s__	1
OTU_3710	k__Bacteria; p__Bacteroidota; c__Bacteroidia; o__Cytophagales; f__Spirosomaceae; g__Spirosoma; s__Spirosoma_aerolatum	2
OTU_3806	k__Bacteria; p__Patescibacteria; c__Saccharimonadia; o__Saccharimonadales; f__Saccharimonadales; g__Saccharimonadales; s__	3
OTU_3807	k__Bacteria; p__Planctomycetota; c__Phycisphaerae; o__Phycisphaerales; f__Phycisphaeraceae; g__; s__	2
OTU_3831	k__Bacteria	2
OTU_3863	k__Bacteria; p__Myxococcota; c__Polyangia; o__Polyangiales; f__BIrii41; g__BIrii41; s__	2
OTU_3870	k__Bacteria; p__Gemmatimonadota; c__Longimicrobia; o__Longimicrobiales; f__Longimicrobiaceae; g__Longimicrobiaceae; s__	1
OTU_3871	k__Bacteria; p__Proteobacteria; c__Alphaproteobacteria; o__Rickettsiales; f__Rickettsiaceae	1
OTU_3897	k__Bacteria; p__Planctomycetota; c__Planctomycetes; o__Gemmatales; f__Gemmataceae; g__Fimbriiglobus; s__	2
OTU_3905	k__Bacteria; p__Chloroflexi; c__Anaerolineae; o__RBG-13-54-9; f__RBG-13-54-9; g__RBG-13-54-9; s__	2
OTU_3923	k__Bacteria; p__Proteobacteria; c__Gammaproteobacteria; o__Cellvibrionales; f__Halieaceae	5
OTU_4027	k__Bacteria; p__Planctomycetota; c__Planctomycetes; o__Isosphaerales; f__Isosphaeraceae; g__; s__	4
OTU_4032	k__Bacteria; p__Bacteroidota; c__Bacteroidia; o__Bacteroidales; f__Prolixibacteraceae; g__; s__	3
OTU_4055	k__Bacteria; p__Acidobacteriota; c__Blastocatellia; o__Blastocatellales; f__Blastocatellaceae	1
OTU_4076	k__Bacteria; p__Actinobacteriota; c__Thermoleophilia; o__Solirubrobacterales; f__67-14; g__67-14; s__	4
OTU_4081	k__Bacteria; p__Proteobacteria; c__Gammaproteobacteria; o__Burkholderiales; f__Neisseriaceae; g__Uruburuella	2
OTU_4104	k__Bacteria; p__Proteobacteria; c__Alphaproteobacteria	1
OTU_4121	k__Bacteria; p__Chloroflexi; c__Ktedonobacteria; o__Ktedonobacterales; f__Ktedonobacteraceae; g__HSB_OF53-F07; s__	1
OTU_4142	k__Bacteria; p__Proteobacteria; c__Gammaproteobacteria; o__Alteromonadales; f__Pseudoalteromonadaceae; g__Pseudoalteromonas	2
OTU_4177	k__Bacteria; p__Cyanobacteria; c__Vampirivibrionia; o__Obscuribacterales; f__Obscuribacteraceae; g__Obscuribacteraceae; s__	3
OTU_4183	k__Bacteria; p__Patescibacteria; c__Saccharimonadia; o__Saccharimonadales	3
OTU_4187	k__Bacteria; p__Patescibacteria; c__Parcubacteria	2
OTU_4194	k__Bacteria; p__Chloroflexi; c__Chloroflexia; o__Chloroflexales; f__Roseiflexaceae; g__; s__Chloroflexaceae_bacterium	3
OTU_4208	k__Bacteria; p__Acidobacteriota; c__Acidobacteriae; o__Solibacterales; f__Solibacteraceae; g__Candidatus_Solibacter; s__	4
OTU_4210	k__Bacteria; p__Proteobacteria; c__Alphaproteobacteria	2
OTU_4232	Unknown	2
OTU_4248	k__Bacteria; p__Myxococcota; c__Polyangia; o__Polyangiales; f__BIrii41; g__BIrii41; s__	2
OTU_4250	k__Bacteria; p__Proteobacteria; c__Gammaproteobacteria; o__Oceanospirillales; f__Oleiphilaceae; g__Oleiphilus; s__	2
OTU_4270	k__Bacteria; p__Cyanobacteria; c__Cyanobacteriia; o__Cyanobacteriales	1
OTU_4288	k__Bacteria; p__Bacteroidota; c__Kapabacteria; o__Kapabacteriales; f__Kapabacteriales; g__Kapabacteriales; s__	2
OTU_4306	k__Bacteria; p__Proteobacteria; c__Alphaproteobacteria; o__; f__; g__; s__Rhodospirillaceae_bacterium	2
OTU_4342	Unknown	1
OTU_4377	k__Bacteria; p__Fibrobacterota; c__Fibrobacteria; o__Fibrobacterales; f__Fibrobacteraceae; g__; s__	2
OTU_4388	Unknown	1			31
OTU_4410	k__Bacteria; p__Proteobacteria; c__Alphaproteobacteria; o__Kiloniellales; f__Fodinicurvataceae; g__; s__	4
OTU_4426	k__Bacteria; p__Firmicutes; c__Negativicutes; o__Veillonellales-Selenomonadales; f__Sporomusaceae; g__; s__	3
OTU_4429	k__Bacteria; p__Actinobacteriota; c__Acidimicrobiia; o__Microtrichales; f__; g__; s__	1
OTU_4443	k__Bacteria; p__Planctomycetota; c__Phycisphaerae; o__Tepidisphaerales; f__WD2101_soil_group; g__WD2101_soil_group; s__	3
OTU_4444	k__Bacteria; p__Acidobacteriota; c__Acidobacteriae; o__Bryobacterales; f__Bryobacteraceae; g__Bryobacter; s__	2
OTU_4455	k__Bacteria; p__Proteobacteria; c__Alphaproteobacteria; o__Rhodobacterales; f__Rhodobacteraceae	5
OTU_4457	k__Bacteria; p__Proteobacteria; c__Alphaproteobacteria; o__Dongiales; f__Dongiaceae; g__Dongia; s__	2
OTU_4459	k__Bacteria; p__Proteobacteria; c__Alphaproteobacteria; o__Rhizobiales	1
OTU_4462	k__Bacteria; p__Actinobacteriota; c__Thermoleophilia; o__Gaiellales; f__; g__; s__bacterium_Ellin6517	1
OTU_4489	k__Bacteria; p__Myxococcota; c__Myxococcia; o__Myxococcales; f__Anaeromyxobacteraceae; g__Anaeromyxobacter; s__	4
OTU_4490	Unknown	1
OTU_4528	k__Bacteria; p__Planctomycetota; c__Planctomycetes; o__Gemmatales; f__Gemmataceae; g__; s__	1
OTU_4541	k__Bacteria; p__Planctomycetota; c__Planctomycetes; o__Pirellulales; f__Pirellulaceae; g__; s__	3
OTU_4549	k__Bacteria; p__Actinobacteriota; c__Actinobacteria; o__Propionibacteriales; f__Nocardioidaceae; g__Nocardioides	1
OTU_4554	k__Bacteria; p__Proteobacteria; c__Alphaproteobacteria; o__; f__; g__; s__	2
OTU_4634	k__Bacteria; p__Proteobacteria; c__Gammaproteobacteria; o__CCM19a; f__CCM19a; g__CCM19a; s__	5
OTU_4671	k__Bacteria; p__Acidobacteriota; c__Vicinamibacteria; o__Vicinamibacterales	1
OTU_4702	k__Bacteria; p__Bdellovibrionota; c__Oligoflexia; o__0319-6G20; f__0319-6G20; g__0319-6G20; s__bacterium_enrichment	3
OTU_4736	k__Bacteria; p__Gemmatimonadota; c__Gemmatimonadetes; o__Gemmatimonadales; f__Gemmatimonadaceae; g__Roseisolibacter; s__	2
OTU_4741	k__Bacteria; p__Verrucomicrobiota; c__Verrucomicrobiae; o__Verrucomicrobiales; f__Verrucomicrobiales; g__Verrucomicrobiales; s__	2
OTU_4746	k__Bacteria; p__Bacteroidota; c__Bacteroidia; o__Cytophagales; f__Microscillaceae; g__; s__	1
OTU_4757	k__Bacteria; p__Proteobacteria; c__Alphaproteobacteria; o__Rhizobiales	1
OTU_4801	k__Bacteria; p__Patescibacteria; c__Saccharimonadia; o__Saccharimonadales; f__Saccharimonadales; g__Saccharimonadales; s__	1
OTU_4969	k__Bacteria; p__Bacteroidota; c__Bacteroidia; o__Chitinophagales; f__Chitinophagaceae; g__Dinghuibacter; s__	1
OTU_5012	k__Bacteria; p__Chloroflexi; c__Chloroflexia; o__Thermomicrobiales; f__JG30-KF-CM45; g__JG30-KF-CM45; s__	1
OTU_5027	k__Bacteria; p__Desulfobacterota; c__Desulfovibrionia; o__Desulfovibrionales; f__Desulfovibrionaceae; g__Desulfovibrio; s__Desulfovibrio_putealis	2
OTU_5067	Unknown	1
OTU_5080	k__Bacteria; p__Methylomirabilota; c__Methylomirabilia; o__Rokubacteriales; f__WX65; g__WX65	2
OTU_5113	k__Bacteria; p__Proteobacteria; c__Gammaproteobacteria; o__PLTA13; f__PLTA13; g__PLTA13; s__	1
OTU_5118	k__Bacteria; p__Proteobacteria; c__Gammaproteobacteria; o__PLTA13; f__PLTA13; g__PLTA13; s__	6
OTU_5120	k__Bacteria; p__Planctomycetota; c__vadinHA49; o__vadinHA49; f__vadinHA49; g__vadinHA49; s__	3
OTU_5155	k__Bacteria; p__Acidobacteriota; c__Vicinamibacteria; o__Vicinamibacterales; f__; g__; s__	2
OTU_5157	k__Bacteria; p__Proteobacteria; c__Alphaproteobacteria; o__Kiloniellales; f__Fodinicurvataceae; g__; s__	1
OTU_5185	k__Bacteria; p__Fibrobacterota; c__Fibrobacteria; o__Fibrobacterales; f__Fibrobacteraceae; g__possible_genus_04; s__	1
OTU_5205	k__Bacteria; p__Actinobacteriota; c__Thermoleophilia; o__Gaiellales; f__Gaiellaceae; g__Gaiella; s__	1
OTU_5208	k__Bacteria; p__Planctomycetota; c__Planctomycetes; o__Gemmatales; f__Gemmataceae; g__; s__	1
OTU_5219	k__Bacteria; p__Verrucomicrobiota; c__Kiritimatiellae; o__WCHB1-41; f__WCHB1-41; g__WCHB1-41	5
OTU_5220	k__Bacteria; p__Bacteroidota; c__Bacteroidia; o__Bacteroidales; f__Williamwhitmaniaceae; g__Blvii28_wastewater-sludge_group; s__	1
OTU_5265	k__Bacteria; p__Bacteroidota; c__Kapabacteria; o__Kapabacteriales; f__Kapabacteriales; g__Kapabacteriales	1
OTU_5272	k__Bacteria; p__Proteobacteria; c__Alphaproteobacteria; o__Rhizobiales; f__Beijerinckiaceae	1
OTU_5337	k__Bacteria; p__Bacteroidota; c__Bacteroidia; o__Sphingobacteriales; f__env.OPS_17; g__env.OPS_17; s__	1
OTU_5406	k__Bacteria; p__Planctomycetota; c__Phycisphaerae; o__Tepidisphaerales; f__WD2101_soil_group; g__WD2101_soil_group; s__	3
OTU_5411	k__Bacteria; p__Proteobacteria; c__Alphaproteobacteria; o__Tistrellales; f__Geminicoccaceae; g__Candidatus_Alysiosphaera; s__	1
OTU_5413	k__Bacteria; p__Proteobacteria; c__Alphaproteobacteria; o__Rhizobiales; f__; g__; s__	3
OTU_5422	k__Bacteria; p__Proteobacteria; c__Alphaproteobacteria	1
OTU_5450	k__Bacteria; p__Acidobacteriota; c__Vicinamibacteria; o__Vicinamibacterales; f__Vicinamibacteraceae; g__Vicinamibacteraceae; s__	1
OTU_5451	k__Bacteria; p__Proteobacteria; c__Gammaproteobacteria; o__Cellvibrionales; f__Halieaceae; g__OM60(NOR5)_clade; s__	2
OTU_5476	k__Bacteria; p__Patescibacteria; c__Saccharimonadia; o__Saccharimonadales; f__Saccharimonadales; g__Saccharimonadales; s__	1
OTU_5505	k__Bacteria; p__Proteobacteria; c__Alphaproteobacteria	3
OTU_5512	k__Bacteria; p__Planctomycetota; c__Phycisphaerae; o__Phycisphaerales; f__Phycisphaeraceae; g__AKYG587; s__	1
OTU_5524	k__Bacteria; p__Gemmatimonadota; c__Gemmatimonadetes; o__Gemmatimonadales; f__Gemmatimonadaceae	1
OTU_5562	k__Bacteria; p__Acidobacteriota; c__Blastocatellia; o__DS-100; f__DS-100; g__DS-100; s__	1
OTU_5572	k__Bacteria; p__Actinobacteriota; c__Acidimicrobiia; o__; f__; g__; s__	1
OTU_5574	k__Bacteria; p__Verrucomicrobiota; c__Verrucomicrobiae; o__Pedosphaerales; f__Pedosphaeraceae; g__Pedosphaeraceae; s__	4
OTU_5597	k__Bacteria	2
OTU_5640	k__Bacteria; p__Acidobacteriota; c__Vicinamibacteria; o__Vicinamibacterales; f__; g__; s__	4
OTU_5659	k__Bacteria; p__Proteobacteria; c__Alphaproteobacteria; o__Rickettsiales; f__SM2D12; g__SM2D12; s__	1
OTU_5664	k__Bacteria; p__Chloroflexi; c__Anaerolineae; o__RBG-13-54-9; f__RBG-13-54-9; g__RBG-13-54-9; s__	5
OTU_5687	k__Bacteria; p__Patescibacteria; c__Gracilibacteria; o__Gracilibacteria; f__Gracilibacteria; g__Gracilibacteria; s__Gracilibacteria_bacterium	1
OTU_5689	k__Bacteria; p__Proteobacteria; c__Gammaproteobacteria; o__Burkholderiales; f__Burkholderiaceae	1
OTU_5732	k__Bacteria	1
OTU_5743	Unknown	1
OTU_5749	Unknown	1
OTU_5792	k__Bacteria	1
OTU_5795	k__Bacteria; p__Proteobacteria; c__Alphaproteobacteria; o__Acetobacterales; f__Acetobacteraceae; g__Roseomonas	1
OTU_5809	k__Bacteria; p__Proteobacteria; c__Alphaproteobacteria; o__; f__; g__	4
OTU_5822	k__Bacteria; p__Myxococcota; c__Polyangia; o__Polyangiales; f__Sandaracinaceae; g__; s__	1
OTU_5825	k__Bacteria; p__Desulfobacterota; c__; o__; f__; g__; s__	4
OTU_5828	k__Bacteria; p__Myxococcota; c__Polyangia; o__Polyangiales; f__Sandaracinaceae; g__	2
OTU_5866	Unknown	1
OTU_5875	k__Bacteria; p__Dependentiae; c__Babeliae; o__Babeliales; f__UBA12409; g__UBA12409; s__	1
OTU_5880	k__Bacteria; p__Acidobacteriota; c__Thermoanaerobaculia; o__Thermoanaerobaculales; f__Thermoanaerobaculaceae; g__Subgroup_10; s__	1
OTU_5881	k__Bacteria; p__Verrucomicrobiota; c__Verrucomicrobiae; o__Chthoniobacterales; f__Chthoniobacteraceae; g__Chthoniobacter; s__	7
OTU_5882	k__Bacteria; p__Myxococcota; c__Polyangia; o__Polyangiales; f__Sandaracinaceae; g__; s__	3
OTU_5885	k__Bacteria; p__Hydrogenedentes; c__Hydrogenedentia; o__Hydrogenedentiales; f__Hydrogenedensaceae; g__Hydrogenedensaceae; s__	3
OTU_5887	k__Bacteria; p__Proteobacteria; c__Alphaproteobacteria; o__Paracaedibacterales; f__Paracaedibacteraceae	1
OTU_5959	k__Bacteria; p__Proteobacteria; c__Gammaproteobacteria; o__Chromatiales; f__Chromatiaceae; g__; s__	1
OTU_5978	k__Bacteria	6
OTU_5986	k__Bacteria	1
OTU_5992	k__Bacteria; p__Planctomycetota; c__Planctomycetes; o__Gemmatales; f__Gemmataceae; g__; s__	1
OTU_6079	k__Bacteria; p__Proteobacteria; c__Gammaproteobacteria	1
OTU_6094	Unknown	1
OTU_6100	k__Bacteria; p__Myxococcota; c__Myxococcia; o__Myxococcales; f__Myxococcaceae	1
OTU_6130	k__Bacteria; p__Proteobacteria; c__Gammaproteobacteria; o__Burkholderiales; f__B1-7BS; g__B1-7BS; s__	4
OTU_6134	k__Bacteria; p__Proteobacteria; c__Alphaproteobacteria; o__Sphingomonadales; f__Sphingomonadaceae	1
OTU_6155	k__Bacteria; p__Bdellovibrionota; c__Oligoflexia; o__Oligoflexales; f__; g__; s__	2
OTU_6171	k__Bacteria; p__Bacteroidota; c__Bacteroidia	1
OTU_6183	k__Bacteria; p__Verrucomicrobiota; c__Verrucomicrobiae; o__Opitutales; f__Puniceicoccaceae; g__Verruc-01	1
OTU_6196	k__Bacteria; p__Planctomycetota; c__Planctomycetes; o__Gemmatales; f__Gemmataceae; g__; s__	1
OTU_6204	Unknown	1
OTU_6280	k__Bacteria; p__Acidobacteriota; c__Vicinamibacteria; o__Subgroup_17; f__Subgroup_17; g__Subgroup_17; s__	1
OTU_6288	k__Bacteria; p__Firmicutes; c__Bacilli; o__Lactobacillales; f__Streptococcaceae; g__Streptococcus; s__Streptococcus_parauberis	1
OTU_6291	k__Bacteria; p__Proteobacteria; c__Alphaproteobacteria; o__Reyranellales; f__Reyranellaceae; g__	3
OTU_6296	k__Bacteria; p__Bacteroidota; c__Bacteroidia	1
OTU_6303	k__Bacteria; p__Planctomycetota; c__Phycisphaerae; o__Tepidisphaerales; f__Tepidisphaeraceae; g__Tepidisphaera; s__	1
OTU_6324	k__Bacteria; p__Verrucomicrobiota; c__Verrucomicrobiae; o__Verrucomicrobiales; f__Verrucomicrobiaceae; g__; s__	1
OTU_6330	k__Bacteria; p__Actinobacteriota; c__Thermoleophilia; o__Solirubrobacterales; f__67-14; g__67-14; s__	1
OTU_6345	k__Bacteria; p__Verrucomicrobiota; c__Verrucomicrobiae; o__Verrucomicrobiales; f__Verrucomicrobiaceae; g__Roseimicrobium; s__Roseimicrobium_gellanilyticum	2
OTU_6353	Unknown	1
OTU_6385	k__Bacteria; p__Proteobacteria; c__Alphaproteobacteria	1
OTU_6390	k__Bacteria; p__Proteobacteria; c__Alphaproteobacteria; o__Zavarziniales; f__; g__; s__	1
OTU_6391	k__Bacteria; p__Proteobacteria; c__Alphaproteobacteria; o__Rhodospirillales; f__; g__; s__	1
OTU_6393	k__Bacteria; p__Patescibacteria; c__Saccharimonadia; o__Saccharimonadales	3
OTU_6398	k__Bacteria; p__Chloroflexi; c__Anaerolineae; o__Caldilineales; f__Caldilineaceae; g__; s__Chloroflexi_bacterium	1
OTU_6403	k__Bacteria; p__Bacteroidota; c__Rhodothermia; o__Rhodothermales; f__Rhodothermaceae; g__	1
OTU_6486	k__Bacteria; p__Proteobacteria; c__Alphaproteobacteria; o__Acetobacterales; f__Acetobacteraceae	1
OTU_6489	k__Bacteria; p__Patescibacteria; c__Gracilibacteria; o__Candidatus_Peribacteria; f__Candidatus_Peribacteria; g__Candidatus_Peribacteria; s__	1
OTU_6518	k__Bacteria; p__Cyanobacteria; c__Vampirivibrionia; o__Obscuribacterales; f__Obscuribacteraceae; g__Obscuribacteraceae; s__	1
OTU_6552	Unknown	1
OTU_6588	k__Bacteria; p__Fibrobacterota; c__Fibrobacteria; o__Fibrobacterales; f__Fibrobacteraceae; g__; s__	2
OTU_6593	k__Bacteria; p__Proteobacteria; c__Gammaproteobacteria; o__Diplorickettsiales; f__Diplorickettsiaceae; g__; s__	1
OTU_6596	k__Bacteria; p__Armatimonadota; c__Fimbriimonadia; o__Fimbriimonadales; f__Fimbriimonadaceae; g__Fimbriimonadaceae; s__	1
OTU_6598	k__Bacteria; p__Acidobacteriota; c__Blastocatellia; o__DS-100; f__DS-100; g__DS-100; s__	1
OTU_6616	k__Bacteria; p__Patescibacteria; c__Gracilibacteria; o__Absconditabacteriales_(SR1); f__Absconditabacteriales_(SR1); g__Absconditabacteriales_(SR1); s__	2
OTU_6618	k__Bacteria; p__Bdellovibrionota; c__Bdellovibrionia; o__Bdellovibrionales; f__Bdellovibrionaceae; g__Bdellovibrio; s__	1
OTU_6620	k__Bacteria; p__Verrucomicrobiota; c__Verrucomicrobiae; o__Verrucomicrobiales; f__Verrucomicrobiaceae; g__Roseimicrobium; s__	1
OTU_6624	k__Bacteria; p__Firmicutes; c__Clostridia; o__Peptostreptococcales-Tissierellales; f__Anaerovoracaceae	1
OTU_6633	k__Bacteria; p__Sumerlaeota; c__Sumerlaeia; o__Sumerlaeales; f__Sumerlaeaceae; g__Sumerlaea; s__	3
OTU_6637	k__Bacteria; p__Proteobacteria; c__Gammaproteobacteria; o__Diplorickettsiales; f__Diplorickettsiaceae; g__; s__	1
OTU_6641	k__Bacteria; p__Firmicutes; c__Bacilli; o__Paenibacillales; f__Paenibacillaceae; g__Paenibacillus; s__Paenibacillus_taiwanensis	1
OTU_6652	k__Bacteria; p__Myxococcota; c__Polyangia; o__Polyangiales	1
OTU_6677	k__Bacteria; p__Chloroflexi; c__Chloroflexia; o__Thermomicrobiales; f__AKYG1722; g__AKYG1722; s__	2
OTU_6679	k__Bacteria; p__Actinobacteriota; c__Actinobacteria; o__Pseudonocardiales; f__Pseudonocardiaceae; g__Pseudonocardia	1
OTU_6682	k__Bacteria; p__Myxococcota; c__Polyangia; o__Polyangiales; f__BIrii41; g__BIrii41; s__	2
OTU_6685	k__Bacteria; p__Proteobacteria; c__Gammaproteobacteria; o__Cellvibrionales; f__Halieaceae	1
OTU_6791	k__Bacteria; p__Deinococcota; c__Deinococci; o__Deinococcales; f__Deinococcaceae; g__Deinococcus; s__Deinococcus_sp.	1
OTU_6883	k__Bacteria; p__Fibrobacterota; c__Fibrobacteria; o__Fibrobacterales; f__Fibrobacteraceae; g__	1
OTU_6893	k__Bacteria; p__Proteobacteria; c__Alphaproteobacteria; o__Rickettsiales; f__Rickettsiaceae; g__; s__	2
OTU_6898	k__Bacteria; p__Patescibacteria; c__Gracilibacteria; o__Absconditabacteriales_(SR1); f__Absconditabacteriales_(SR1); g__Absconditabacteriales_(SR1)	3
OTU_6909	k__Bacteria; p__Cyanobacteria; c__Cyanobacteriia; o__Chloroplast; f__Chloroplast; g__Chloroplast	1
OTU_6915	k__Bacteria; p__Sumerlaeota; c__Sumerlaeia; o__Sumerlaeales; f__Sumerlaeaceae; g__Sumerlaea; s__	1
OTU_6916	k__Bacteria; p__Proteobacteria; c__Alphaproteobacteria	4
OTU_6917	k__Bacteria; p__Planctomycetota; c__Phycisphaerae; o__Tepidisphaerales; f__Tepidisphaeraceae; g__Tepidisphaera; s__	1
OTU_6919	k__Bacteria; p__Proteobacteria; c__Gammaproteobacteria; o__Burkholderiales	1
OTU_6920	k__Bacteria; p__Acidobacteriota; c__Acidobacteriae; o__Bryobacterales; f__Bryobacteraceae; g__Bryobacter; s__	1
OTU_6926	Unknown	1
OTU_6927	k__Bacteria; p__Acidobacteriota; c__Vicinamibacteria; o__Vicinamibacterales; f__Vicinamibacteraceae; g__Vicinamibacteraceae; s__	2
OTU_6942	Unknown	1
OTU_7000	Unknown	1
OTU_7041	k__Bacteria; p__Proteobacteria; c__Gammaproteobacteria; o__Cellvibrionales; f__Cellvibrionaceae; g__Cellvibrio	1
OTU_7062	k__Bacteria; p__Chloroflexi; c__Chloroflexia; o__Thermomicrobiales; f__JG30-KF-CM45; g__JG30-KF-CM45; s__	1
OTU_7082	k__Bacteria; p__Bacteroidota; c__Bacteroidia; o__Chitinophagales; f__Chitinophagaceae	1
OTU_7105	k__Bacteria; p__Planctomycetota; c__Planctomycetes; o__Isosphaerales; f__Isosphaeraceae; g__; s__	1
OTU_7107	k__Bacteria; p__Bacteroidota; c__Bacteroidia; o__Sphingobacteriales; f__Sphingobacteriaceae; g__Sphingobacterium; s__Sphingobacterium_spiritivorum	2
OTU_7120	k__Bacteria; p__Patescibacteria; c__Parcubacteria	1
OTU_7136	k__Bacteria; p__Proteobacteria; c__Gammaproteobacteria; o__Burkholderiales; f__Chitinibacteraceae; g__Chitiniphilus; s__Chitiniphilus_sp.	1
OTU_7137	k__Bacteria; p__Planctomycetota; c__Phycisphaerae; o__Tepidisphaerales; f__WD2101_soil_group; g__WD2101_soil_group; s__	1
OTU_7145	k__Bacteria; p__Firmicutes; c__Negativicutes; o__Veillonellales-Selenomonadales; f__Sporomusaceae; g__Sporomusa	2
OTU_7156	k__Bacteria; p__Acidobacteriota; c__Acidobacteriae; o__Bryobacterales; f__Bryobacteraceae; g__Bryobacter	3
OTU_7158	k__Bacteria; p__Proteobacteria; c__Alphaproteobacteria; o__Parvibaculales; f__Parvibaculaceae; g__; s__	1
OTU_7160	k__Bacteria; p__Proteobacteria; c__Alphaproteobacteria; o__Micavibrionales; f__; g__; s__	1
OTU_7163	k__Bacteria; p__Chloroflexi; c__Chloroflexia; o__Thermomicrobiales; f__AKYG1722; g__AKYG1722; s__	1
OTU_7168	k__Bacteria; p__Chloroflexi; c__JG30-KF-CM66; o__JG30-KF-CM66; f__JG30-KF-CM66; g__JG30-KF-CM66; s__	2
OTU_7170	k__Bacteria; p__Verrucomicrobiota; c__Verrucomicrobiae; o__Verrucomicrobiales; f__Verrucomicrobiaceae	1
OTU_7172	k__Bacteria; p__Bacteroidota; c__Bacteroidia; o__Sphingobacteriales; f__Lentimicrobiaceae; g__Lentimicrobium	1
OTU_7174	k__Bacteria; p__Planctomycetota; c__Planctomycetes; o__Gemmatales; f__Gemmataceae; g__; s__	1
OTU_7191	k__Bacteria; p__Gemmatimonadota; c__Gemmatimonadetes; o__Gemmatimonadales; f__Gemmatimonadaceae; g__; s__	1
OTU_7201	k__Bacteria; p__Bdellovibrionota; c__Bdellovibrionia; o__Bdellovibrionales; f__Bdellovibrionaceae; g__Bdellovibrio; s__	9
OTU_7207	k__Bacteria; p__Proteobacteria; c__Alphaproteobacteria; o__Puniceispirillales; f__EF100-94H03; g__EF100-94H03; s__	2
OTU_7231	Unknown	1
OTU_7256	Unknown	1
OTU_7350	k__Bacteria; p__Methylomirabilota; c__Methylomirabilia; o__Rokubacteriales; f__Rokubacteriales; g__Rokubacteriales; s__	2
OTU_7356	k__Bacteria; p__Proteobacteria; c__Alphaproteobacteria; o__Acetobacterales; f__Acetobacteraceae	1
OTU_7357	k__Bacteria; p__Firmicutes; c__Bacilli; o__Haloplasmatales; f__Haloplasmataceae; g__Haloplasma; s__	1
OTU_7370	k__Bacteria; p__Proteobacteria; c__Gammaproteobacteria; o__Burkholderiales; f__Comamonadaceae	2
OTU_7371	k__Bacteria; p__Firmicutes; c__Bacilli; o__Bacillales; f__Bacillaceae; g__; s__	1
OTU_7381	k__Bacteria; p__Verrucomicrobiota; c__Verrucomicrobiae; o__Pedosphaerales; f__Pedosphaeraceae	1
OTU_7382	k__Bacteria; p__Chloroflexi; c__TK10; o__TK10; f__TK10; g__TK10; s__	1
OTU_7385	k__Bacteria; p__Chloroflexi; c__Anaerolineae; o__Caldilineales; f__Caldilineaceae; g__; s__	1
OTU_7402	k__Bacteria; p__Bdellovibrionota; c__Bdellovibrionia; o__Bdellovibrionales; f__Bdellovibrionaceae; g__Bdellovibrio; s__	2
OTU_7409	k__Bacteria	1
OTU_7413	k__Bacteria; p__Verrucomicrobiota; c__Chlamydiae; o__Chlamydiales; f__Parachlamydiaceae; g__Neochlamydia; s__	1
OTU_7419	k__Bacteria; p__Chloroflexi	1
OTU_7433	k__Bacteria; p__Proteobacteria; c__Gammaproteobacteria; o__Xanthomonadales; f__Rhodanobacteraceae	2
OTU_7463	k__Bacteria; p__Desulfobacterota; c__Desulfuromonadia; o__PB19; f__PB19; g__PB19; s__	2
OTU_7476	k__Bacteria; p__Chloroflexi; c__Chloroflexia; o__Chloroflexales; f__Roseiflexaceae; g__; s__	1
OTU_7486	k__Bacteria; p__Chloroflexi; c__Anaerolineae; o__Caldilineales; f__Caldilineaceae; g__; s__	1
OTU_7546	k__Bacteria; p__Bacteroidota; c__Bacteroidia; o__Cytophagales; f__Microscillaceae; g__; s__	14
OTU_7548	k__Bacteria; p__Proteobacteria; c__Alphaproteobacteria; o__Rickettsiales; f__SM2D12; g__SM2D12; s__	1
OTU_7576	k__Bacteria; p__Verrucomicrobiota; c__Verrucomicrobiae; o__Opitutales; f__Opitutaceae	1
OTU_7585	k__Bacteria; p__Acidobacteriota; c__Vicinamibacteria; o__Vicinamibacterales; f__; g__; s__	4
OTU_7587	k__Bacteria; p__NB1-j; c__NB1-j; o__NB1-j; f__NB1-j; g__NB1-j; s__	1
OTU_7603	k__Bacteria; p__Planctomycetota; c__Planctomycetes; o__Gemmatales; f__Gemmataceae; g__; s__	1
OTU_7607	k__Bacteria; p__Bacteroidota; c__Bacteroidia; o__Bacteroidales; f__Williamwhitmaniaceae; g__Blvii28_wastewater-sludge_group; s__	1
OTU_7610	k__Bacteria; p__Proteobacteria; c__Gammaproteobacteria; o__Burkholderiales; f__SC-I-84; g__SC-I-84; s__	2
