# Supplementary material for: Microbiome Composition and Microbial Community Structure in Mosquito Vectors Aedes aegypti and Aedes albopictus in Northeastern Thailand, a Dengue-Endemic Area
Source: Insects. 2023 Feb 13;14(2):184. doi: 10.3390/insects14020184 (PMC9961164; doi:10.3390/insects14020184)
Supplement: Supplementary file 1 [file insects-14-00184-s001.zip › Table S5_28-12-22.xlsx]

## Sheet: AeyL-vs-AlbL.psig
Table S5. Results of tests for significant differences in abundance of bacterial genera among mosquito species (arranged by life-stage and gender)
Statistical metrics were obtained from Metastats analysis in the genus with a p-value less than 0.05.
Taxa	mean(AeyL)	variance(AeyL)	standard error(AeyL)	mean(AlbL)	variance(AlbL)	standard error(AlbL)	p value
k__Bacteria;p__Proteobacteria;c__Gammaproteobacteria;o__Enterobacterales;f__Enterobacteriaceae;g__Escherichia-Shigella;	0.0102355	4.97108e-05	0.00407066	6.36406e-05	2.27819e-09	2.75572e-05	0.0260574
k__Bacteria;p__Proteobacteria;c__Alphaproteobacteria;o__Sphingomonadales;f__Sphingomonadaceae;g__Novosphingobium;	0.00468288	6.64785e-06	0.00148861	0.00103416	2.92621e-07	0.000312315	0.028916
k__Bacteria;p__Firmicutes;c__Clostridia;o__Lachnospirales;f__Lachnospiraceae;g__Blautia;	0.00263578	4.61823e-06	0.00124073	5.30338e-05	2.36257e-09	2.80628e-05	0.0394344
k__Bacteria;p__Actinobacteriota;c__Actinobacteria;o__Corynebacteriales;f__Nocardiaceae;g__Gordonia;	0.00170769	1.46117e-06	0.000697893	0.000275776	5.42547e-08	0.00013448	0.0422971
k__Bacteria;p__Firmicutes;c__Bacilli;o__Lactobacillales;f__Lactobacillaceae;g__Lactobacillus;	0.000885664	1.78796e-07	0.000244128	0.000175012	1.69599e-08	7.51884e-05	0.0189918
k__Bacteria;p__Chloroflexi;c__Anaerolineae;o__SBR1031;f__A4b;g__A4b;	0.000631102	9.27309e-08	0.000175813	8.48541e-05	4.1345e-09	3.71237e-05	0.0156516
k__Bacteria;p__Proteobacteria;c__Gammaproteobacteria;o__Enterobacterales;f__Yersiniaceae;g__Rahnella1;	0.000620495	6.78395e-08	0.000150377	7.42473e-05	5.90643e-10	1.40314e-05	0.00991393
k__Bacteria;p__Bacteroidota;c__Bacteroidia;o__Flavobacteriales;f__Crocinitomicaceae;g__Fluviicola;	0.000578068	1.51205e-07	0.000224503	4.77304e-05	1.77193e-09	2.43031e-05	0.0297234
k__Bacteria;p__Proteobacteria;c__Gammaproteobacteria;o__Burkholderiales;f__Oxalobacteraceae;g__Undibacterium;	0.000562158	7.90617e-08	0.000162339	4.77304e-05	2.53133e-10	9.18572e-06	0.0137234
k__Bacteria;p__Firmicutes;c__Bacilli;o__Lactobacillales;f__Streptococcaceae;g__Streptococcus;	0.000556855	6.32831e-09	4.59286e-05	5.30338e-05	1.35004e-09	2.12135e-05	0.000819672
k__Bacteria;p__Proteobacteria;c__Gammaproteobacteria;o__Pseudomonadales;f__Moraxellaceae;g__Acinetobacter;	0.000450787	6.6152e-08	0.000148495	0.000132584	7.67835e-09	5.0591e-05	0.0415266
k__Bacteria;p__Patescibacteria;c__Saccharimonadia;o__Saccharimonadales;f__Saccharimonadales;g__Saccharimonadales;	0.000429574	5.49298e-08	0.000135314	0.000106068	1.67911e-08	7.48134e-05	0.0392357
k__Bacteria;p__Proteobacteria;c__Gammaproteobacteria;o__Enterobacterales;f__Enterobacteriaceae;g__Citrobacter;	0.00039245	2.33726e-08	8.82658e-05	4.77304e-05	7.59398e-10	1.59101e-05	0.00930533
k__Bacteria;p__Proteobacteria;c__Alphaproteobacteria;o__Reyranellales;f__Reyranellaceae;g__Reyranella;	0.000312899	1.88162e-08	7.91963e-05	9.01575e-05	2.36257e-09	2.80628e-05	0.021832
k__Bacteria;p__Proteobacteria;c__Gammaproteobacteria;o__Burkholderiales;f__Burkholderiaceae;g__Ralstonia;	0.000233349	3.62823e-09	3.47766e-05	0.000111371	3.03759e-09	3.18203e-05	0.0232705
k__Bacteria;p__Proteobacteria;c__Gammaproteobacteria;o__Enterobacterales;f__Enterobacteriaceae;g__Kosakonia;	0.000318203	7.08771e-09	4.86063e-05	5.30338e-06	8.43775e-11	5.30338e-06	0.00253484
k__Bacteria;p__Bacteroidota;c__Bacteroidia;o__Cytophagales;f__Spirosomaceae;g__Arcicella;	0.000302293	4.42982e-08	0.000121516	2.12135e-05	5.90643e-10	1.40314e-05	0.0315717
k__Bacteria;p__Proteobacteria;c__Alphaproteobacteria;o__Rhizobiales;f__Xanthobacteraceae;g__Bradyrhizobium;	0.000169708	5.65329e-09	4.341e-05	5.83372e-05	3.3751e-10	1.06068e-05	0.0262561
k__Bacteria;p__Firmicutes;c__Clostridia;o__Clostridia_UCG-014;f__Clostridia_UCG-014;g__Clostridia_UCG-014;	0.000185618	6.66582e-09	4.71375e-05	0	0	0	0.00831762
k__Bacteria;p__Bacteroidota;c__Bacteroidia;o__Bacteroidales;f__Rikenellaceae;g__Alistipes;	0.000143191	7.84711e-09	5.11439e-05	2.12135e-05	5.90643e-10	1.40314e-05	0.031373
k__Bacteria;p__Firmicutes;c__Clostridia;o__Clostridiales;f__Clostridiaceae;g__Clostridium_sensu_stricto_5;	0.000121978	7.67835e-09	5.0591e-05	1.59101e-05	7.59398e-10	1.59101e-05	0.0429303
k__Bacteria;p__Bacteroidota;c__Bacteroidia;o__Bacteroidales;f__Muribaculaceae;g__Muribaculaceae;	9.54608e-05	1.77193e-09	2.43031e-05	0	0	0	0.00851639
k__Bacteria;p__Proteobacteria;c__Alphaproteobacteria;o__Caulobacterales;f__Caulobacteraceae;g__Phenylobacterium;	7.95507e-05	1.77193e-09	2.43031e-05	1.06068e-05	8.43775e-11	5.30338e-06	0.0195717
k__Bacteria;p__Bacteroidota;c__Bacteroidia;o__Chitinophagales;f__Chitinophagaceae;g__Dinghuibacter;	6.36406e-05	2.53133e-10	9.18572e-06	2.65169e-05	5.90643e-10	1.40314e-05	0.033752
k__Bacteria;p__Firmicutes;c__Clostridia;o__Lachnospirales;f__Lachnospiraceae;g__Anaerostipes;	9.01575e-05	5.90643e-10	1.40314e-05	0	0	0	0.00233607
k__Bacteria;p__Actinobacteriota;c__Thermoleophilia;o__Solirubrobacterales;f__67-14;g__67-14;	6.36406e-05	1.77193e-09	2.43031e-05	0	0	0	0.0228668
k__Bacteria;p__Proteobacteria;c__Gammaproteobacteria;o__Burkholderiales;f__Comamonadaceae;g__Delftia;	5.30338e-05	5.90643e-10	1.40314e-05	5.30338e-06	8.43775e-11	5.30338e-06	0.0127029
k__Bacteria;p__Actinobacteriota;c__Rubrobacteria;o__Rubrobacterales;f__Rubrobacteriaceae;g__Rubrobacter;	5.30338e-05	5.90643e-10	1.40314e-05	5.30338e-06	8.43775e-11	5.30338e-06	0.0127029
k__Bacteria;p__Actinobacteriota;c__Actinobacteria;o__Frankiales;f__Nakamurellaceae;g__Nakamurella;	5.83372e-05	1.35004e-09	2.12135e-05	0	0	0	0.019957
k__Bacteria;p__Firmicutes;c__Clostridia;o__Lachnospirales;f__Lachnospiraceae;g__Eubacterium_eligens_group;	5.83372e-05	2.36257e-09	2.80628e-05	0	0	0	0.0396332
k__Bacteria;p__Firmicutes;c__Negativicutes;o__Veillonellales-Selenomonadales;f__Veillonellaceae;g__Veillonella;	5.30338e-05	1.09691e-09	1.91216e-05	0	0	0	0.0191906
k__Bacteria;p__Proteobacteria;c__Gammaproteobacteria;o__Burkholderiales;f__Comamonadaceae;g__Mitsuaria;	4.77304e-05	1.01253e-09	1.83714e-05	5.30338e-06	8.43775e-11	5.30338e-06	0.0333484
k__Bacteria;p__Bacteroidota;c__Bacteroidia;o__Cytophagales;f__Spirosomaceae;g__Lacihabitans;	1.06068e-05	3.3751e-10	1.06068e-05	4.2427e-05	3.3751e-10	1.06068e-05	0.0369098
k__Bacteria;p__Desulfobacterota;c__Desulfobulbia;o__Desulfobulbales;f__Desulfobulbaceae;g__Desulfobulbus;	4.2427e-05	5.90643e-10	1.40314e-05	5.30338e-06	8.43775e-11	5.30338e-06	0.0268893
k__Bacteria;p__Proteobacteria;c__Gammaproteobacteria;o__Burkholderiales;f__Comamonadaceae;g__Rubrivivax;	3.71237e-05	8.43775e-11	5.30338e-06	5.30338e-06	8.43775e-11	5.30338e-06	0.00521311
k__Bacteria;p__Firmicutes;c__Bacilli;o__Staphylococcales;f__Gemellaceae;g__Gemella;	4.2427e-05	5.90643e-10	1.40314e-05	0	0	0	0.0158504
k__Bacteria;p__Bacteroidota;c__Bacteroidia;o__Bacteroidales;f__Rikenellaceae;g__Rikenellaceae_RC9_gut_group;	2.65169e-05	3.3751e-10	1.06068e-05	0	0	0	0.024459
k__Bacteria;p__Bacteroidota;c__Bacteroidia;o__Bacteroidales;f__Prevotellaceae;g__Alloprevotella;	2.12135e-05	8.43775e-11	5.30338e-06	0	0	0	0.00648361
k__Bacteria;p__Fusobacteriota;c__Fusobacteriia;o__Fusobacteriales;f__Leptotrichiaceae;g__Leptotrichia;	2.12135e-05	3.3751e-10	1.06068e-05	0	0	0	0.0429303
k__Bacteria;p__Proteobacteria;c__Gammaproteobacteria;o__Burkholderiales;f__Methylophilaceae;g__Methylotenera;	5.30338e-06	8.43775e-11	5.30338e-06	1.59101e-05	0	0	0.0429303
k__Bacteria;p__Proteobacteria;c__Alphaproteobacteria;o__Rhizobiales;f__Xanthobacteraceae;g__Rhodoplanes;	1.59101e-05	0	0	0	0	0	0
k__Bacteria;p__Proteobacteria;c__Gammaproteobacteria;o__Xanthomonadales;f__Xanthomonadaceae;g__Luteimonas;	1.59101e-05	0	0	0	0	0	0

## Sheet: AeyF-vs-AlbF.psig
Table S5. Results of tests for significant differences in abundance of bacterial genera among mosquito species (arranged by life-stage and gender)
Statistical metrics were obtained from Metastats analysis in the genus with a p-value less than 0.05.
Taxa	mean(AeyF)	variance(AeyF)	standard error(AeyF)	mean(AlbF)	variance(AlbF)	standard error(AlbF)	p value
k__Bacteria;p__Firmicutes;c__Clostridia;o__Lachnospirales;f__Lachnospiraceae;g__Blautia;	0.0278003	0.000399395	0.0115383	0.00413133	2.37042e-06	0.000888898	0.0382447
k__Bacteria;p__Firmicutes;c__Clostridia;o__Peptostreptococcales-Tissierellales;f__Peptostreptococcaceae;g__Clostridioides;	0.0200574	0.000198142	0.00812695	0.00303353	2.46205e-06	0.000905916	0.0366655
k__Bacteria;p__Firmicutes;c__Bacilli;o__Lactobacillales;f__Enterococcaceae;g__Enterococcus;	0.008321	3.881e-05	0.00359676	0.000959912	1.42345e-07	0.000217826	0.0384173
k__Bacteria;p__Nitrospirota;c__Nitrospiria;o__Nitrospirales;f__Nitrospiraceae;g__Nitrospira;	0.00677772	1.93851e-05	0.00254199	9.54608e-05	5.31578e-09	4.20943e-05	0.0196937
k__Bacteria;p__Firmicutes;c__Bacilli;o__Erysipelotrichales;f__Erysipelotrichaceae;g__Dubosiella;	0.00545187	1.60705e-05	0.00231448	0.000540945	6.55613e-08	0.00014783	0.0343398
k__Bacteria;p__Proteobacteria;c__Alphaproteobacteria;o__Reyranellales;f__Reyranellaceae;g__Reyranella;	0.00543596	1.466e-05	0.00221058	2.65169e-05	3.3751e-10	1.06068e-05	0.0220282
k__Bacteria;p__Proteobacteria;c__Alphaproteobacteria;o__Sphingomonadales;f__Sphingomonadaceae;g__Sphingomonas;	0.0031396	1.42674e-06	0.000689623	0.00073717	9.55153e-08	0.000178433	0.0102835
k__Bacteria;p__Acidobacteriota;c__Vicinamibacteria;o__Vicinamibacterales;f__Vicinamibacteraceae;g__Vicinamibacteraceae;	0.00337825	5.00603e-06	0.00129177	5.30338e-06	8.43775e-11	5.30338e-06	0.0198662
k__Bacteria;p__Proteobacteria;c__Alphaproteobacteria;o__Rhodobacterales;f__Rhodobacteraceae;g__Rhodobacter;	0.00268881	3.96887e-06	0.0011502	0.000302293	3.29072e-09	3.31196e-05	0.0373627
k__Bacteria;p__Acidobacteriota;c__Acidobacteriae;o__Bryobacterales;f__Bryobacteraceae;g__Bryobacter;	0.00244486	2.43319e-06	0.000900591	4.77304e-05	4.80952e-09	4.00396e-05	0.0188099
k__Bacteria;p__Proteobacteria;c__Alphaproteobacteria;o__Rhizobiales;f__Xanthobacteraceae;g__Ancylobacter;	0.00177133	7.77708e-07	0.000509152	0.000509124	7.69523e-08	0.000160159	0.0232588
k__Bacteria;p__Proteobacteria;c__Gammaproteobacteria;o__Xanthomonadales;f__Xanthomonadaceae;g__Pseudoxanthomonas;	0.00170238	1.07024e-06	0.000597284	0.000312899	1.37535e-08	6.7709e-05	0.0245018
k__Bacteria;p__Firmicutes;c__Bacilli;o__Erysipelotrichales;f__Erysipelatoclostridiaceae;g__Erysipelatoclostridium;	0.0017183	1.68384e-06	0.000749186	0.000132584	1.35004e-09	2.12135e-05	0.0345123
k__Bacteria;p__Proteobacteria;c__Alphaproteobacteria;o__Caulobacterales;f__Caulobacteraceae;g__Phenylobacterium;	0.00178194	3.47045e-07	0.00034012	4.77304e-05	7.59398e-10	1.59101e-05	0.00271303
k__Bacteria;p__Myxococcota;c__Polyangia;o__Polyangiales;f__BIrii41;g__BIrii41;	0.00180845	2.12058e-06	0.000840749	5.30338e-06	8.43775e-11	5.30338e-06	0.0303891
k__Bacteria;p__Proteobacteria;c__Alphaproteobacteria;o__Caulobacterales;f__Hyphomonadaceae;g__Hirschia;	0.00169178	5.67861e-08	0.000137582	1.59101e-05	7.59398e-10	1.59101e-05	0
k__Bacteria;p__Armatimonadota;c__Fimbriimonadia;o__Fimbriimonadales;f__Fimbriimonadaceae;g__Fimbriimonadaceae;	0.00149025	1.49584e-06	0.000706127	2.12135e-05	5.90643e-10	1.40314e-05	0.036838
k__Bacteria;p__Verrucomicrobiota;c__Verrucomicrobiae;o__Pedosphaerales;f__Pedosphaeraceae;g__Pedosphaeraceae;	0.00132584	1.2093e-06	0.000634901	1.06068e-05	3.3751e-10	1.06068e-05	0.0377095
k__Bacteria;p__Firmicutes;c__Clostridia;o__Lachnospirales;f__Lachnospiraceae;g__Dorea;	0.000869754	3.04856e-07	0.000318777	0.000212135	7.67835e-09	5.0591e-05	0.0387641
k__Bacteria;p__Firmicutes;c__Clostridia;o__Lachnospirales;f__Lachnospiraceae;g__Anaerostipes;	0.000726563	1.79555e-07	0.000244646	0.000201528	2.6157e-09	2.9528e-05	0.031963
k__Bacteria;p__Proteobacteria;c__Gammaproteobacteria;o__R7C24;f__R7C24;g__R7C24;	0.000880361	2.3727e-07	0.000281229	5.30338e-06	8.43775e-11	5.30338e-06	0.0131268
k__Bacteria;p__Proteobacteria;c__Alphaproteobacteria;o__Rhodobacterales;f__Rhodobacteraceae;g__Gemmobacter;	0.000217439	2.64102e-08	9.38264e-05	0.000636406	8.88495e-08	0.000172094	0.0309243
k__Bacteria;p__Proteobacteria;c__Gammaproteobacteria;o__Diplorickettsiales;f__Diplorickettsiaceae;g__Aquicella;	0.00081672	1.87656e-07	0.000250104	0	0	0	0.0113644
k__Bacteria;p__Proteobacteria;c__Alphaproteobacteria;o__Sphingomonadales;f__Sphingomonadaceae;g__Sphingobium;	0.00070535	2.26132e-08	8.68201e-05	0.000106068	2.10944e-09	2.65169e-05	0.00127113
k__Bacteria;p__Myxococcota;c__Polyangia;o__Polyangiales;f__Polyangiaceae;g__Pajaroellobacter;	0.000763687	4.04e-07	0.000366969	3.18203e-05	7.59398e-10	1.59101e-05	0.0490792
k__Bacteria;p__Proteobacteria;c__Gammaproteobacteria;o__Burkholderiales;f__Nitrosomonadaceae;g__Nitrosomonas;	0.00076899	3.30169e-07	0.000331747	0	0	0	0.0243292
k__Bacteria;p__Proteobacteria;c__Alphaproteobacteria;o__Rhizobiales;f__Beijerinckiaceae;g__Methylobacterium-Methylorubrum;	0.000546248	6.08362e-08	0.000142403	7.95507e-05	5.31578e-09	4.20943e-05	0.0127817
k__Bacteria;p__Proteobacteria;c__Alphaproteobacteria;o__Sphingomonadales;f__Sphingomonadaceae;g__Croceicoccus;	0.000525035	8.37869e-08	0.00016712	8.48541e-05	2.6157e-09	2.9528e-05	0.0200387
k__Bacteria;p__Proteobacteria;c__Gammaproteobacteria;o__Burkholderiales;f__Nitrosomonadaceae;g__MND1;	0.000599282	1.31713e-07	0.000209534	0	0	0	0.0163644
k__Bacteria;p__Proteobacteria;c__Gammaproteobacteria;o__Gammaproteobacteria_Incertae_Sedis;f__Unknown_Family;g__Acidibacter;	0.000551552	6.13425e-08	0.000142995	1.06068e-05	8.43775e-11	5.30338e-06	0.00660035
k__Bacteria;p__Bacteroidota;c__Bacteroidia;o__Sphingobacteriales;f__env.OPS_17;g__env.OPS_17;	0.000482608	1.58545e-07	0.000229888	0	0	0	0.0352324
k__Bacteria;p__Proteobacteria;c__Gammaproteobacteria;o__Burkholderiales;f__Comamonadaceae;g__Variovorax;	0.000339416	3.40041e-08	0.000106465	0.000111371	5.31578e-09	4.20943e-05	0.0492518
k__Bacteria;p__Proteobacteria;c__Gammaproteobacteria;o__Burkholderiales;f__SC-I-84;g__SC-I-84;	0.000371237	3.95731e-08	0.000114852	3.18203e-05	3.03759e-09	3.18203e-05	0.016537
k__Bacteria;p__Actinobacteriota;c__Actinobacteria;o__Frankiales;f__Frankiales;g__Frankiales;	0.000397753	9.13808e-08	0.000174529	0	0	0	0.026037
k__Bacteria;p__Bacteroidota;c__Kapabacteria;o__Kapabacteriales;f__Kapabacteriales;g__Kapabacteriales;	0.000371237	6.69114e-08	0.000149345	5.30338e-06	8.43775e-11	5.30338e-06	0.0218556
k__Bacteria;p__Proteobacteria;c__Alphaproteobacteria;o__Sphingomonadales;f__Sphingomonadaceae;g__Erythrobacter;	0.000323506	2.18538e-08	8.53498e-05	4.77304e-05	1.77193e-09	2.43031e-05	0.0132993
k__Bacteria;p__Firmicutes;c__Bacilli;o__Erysipelotrichales;f__Erysipelatoclostridiaceae;g__Erysipelotrichaceae_UCG-003;	0.000270472	2.30351e-08	8.76262e-05	5.83372e-05	3.3751e-10	1.06068e-05	0.0230863
k__Bacteria;p__Proteobacteria;c__Gammaproteobacteria;o__Coxiellales;f__Coxiellaceae;g__Coxiella;	0.000286383	4.32857e-08	0.000120119	5.30338e-06	8.43775e-11	5.30338e-06	0.0239824
k__Bacteria;p__Proteobacteria;c__Gammaproteobacteria;o__Burkholderiales;f__TRA3-20;g__TRA3-20;	0.000270472	1.54411e-08	7.17428e-05	1.59101e-05	7.59398e-10	1.59101e-05	0.00887676
k__Bacteria;p__Proteobacteria;c__Gammaproteobacteria;o__Burkholderiales;f__Nitrosomonadaceae;g__oc32;	0.000270472	4.80952e-09	4.00396e-05	0	0	0	0.00109859
k__Bacteria;p__Bacteroidota;c__Bacteroidia;o__Sphingobacteriales;f__NS11-12_marine_group;g__NS11-12_marine_group;	0.000254562	4.80952e-09	4.00396e-05	1.06068e-05	3.3751e-10	1.06068e-05	0.00216373
k__Bacteria;p__Actinobacteriota;c__Thermoleophilia;o__Solirubrobacterales;f__67-14;g__67-14;	0.000259866	2.0335e-08	8.23306e-05	0	0	0	0.0124208
k__Bacteria;p__WPS-2;c__WPS-2;o__WPS-2;f__WPS-2;g__WPS-2;	0.000238652	3.26541e-08	0.00010433	0	0	0	0.0258644
k__Bacteria;p__Proteobacteria;c__Alphaproteobacteria;o__Rhizobiales;f__Rhizobiaceae;g__Aureimonas;	0.000180315	3.62823e-09	3.47766e-05	4.77304e-05	1.01253e-09	1.83714e-05	0.010456
k__Bacteria;p__Bacteroidota;c__Bacteroidia;o__Chitinophagales;f__Chitinophagaceae;g__Dinghuibacter;	0.000217439	1.42598e-08	6.89439e-05	5.30338e-06	8.43775e-11	5.30338e-06	0.0138345
k__Bacteria;p__Verrucomicrobiota;c__Verrucomicrobiae;o__Verrucomicrobiales;f__Verrucomicrobiaceae;g__Prosthecobacter;	0.000217439	1.93225e-08	8.02547e-05	0	0	0	0.0182746
k__Bacteria;p__Bacteroidota;c__Bacteroidia;o__Chitinophagales;f__Chitinophagaceae;g__Sediminibacterium;	0.000196225	5.65329e-09	4.341e-05	1.06068e-05	8.43775e-11	5.30338e-06	0.00359331
k__Bacteria;p__Chloroflexi;c__Chloroflexia;o__Thermomicrobiales;f__JG30-KF-CM45;g__JG30-KF-CM45;	0.000190922	7.84711e-09	5.11439e-05	1.06068e-05	8.43775e-11	5.30338e-06	0.0081743
k__Bacteria;p__Proteobacteria;c__Gammaproteobacteria;o__Burkholderiales;f__Burkholderiaceae;g__Burkholderia-Caballeronia-Paraburkholderia;	0.000175012	7.84711e-09	5.11439e-05	2.12135e-05	3.3751e-10	1.06068e-05	0.0156268
k__Bacteria;p__Actinobacteriota;c__Actinobacteria;o__Propionibacteriales;f__Nocardioidaceae;g__Nocardioides;	0.000132584	2.10944e-09	2.65169e-05	3.18203e-05	1.01253e-09	1.83714e-05	0.0129542
k__Bacteria;p__Actinobacteriota;c__Actinobacteria;o__Micrococcales;f__Cellulomonadaceae;g__Cellulomonas;	0.000116674	1.35004e-09	2.12135e-05	4.77304e-05	1.77193e-09	2.43031e-05	0.0310968
k__Bacteria;p__Acidobacteriota;c__Blastocatellia;o__11-24;f__11-24;g__11-24;	0.000159101	1.44286e-08	6.93507e-05	0	0	0	0.0250106
k__Bacteria;p__Bacteroidota;c__Bacteroidia;o__Chitinophagales;f__Chitinophagaceae;g__Terrimonas;	0.000127281	7.08771e-09	4.86063e-05	2.12135e-05	5.90643e-10	1.40314e-05	0.0357817
k__Bacteria;p__Bdellovibrionota;c__Oligoflexia;o__Oligoflexales;f__Oligoflexales;g__Oligoflexus;	0.000132584	1.09691e-09	1.91216e-05	5.30338e-06	8.43775e-11	5.30338e-06	0.00144366
k__Bacteria;p__Acidobacteriota;c__Acidobacteriae;o__Elev-16S-1166;f__Elev-16S-1166;g__Elev-16S-1166;	0.000127281	4.05012e-09	3.67429e-05	0	0	0	0.0090493
k__Bacteria;p__Planctomycetota;c__Planctomycetes;o__Planctomycetales;f__Schlesneriaceae;g__Schlesneria;	0.000111371	9.3659e-09	5.58746e-05	0	0	0	0.0483592
k__Bacteria;p__Planctomycetota;c__Planctomycetes;o__Gemmatales;f__Gemmataceae;g__Fimbriiglobus;	0.000100764	6.41269e-09	4.62338e-05	0	0	0	0.0294806
k__Bacteria;p__Proteobacteria;c__Alphaproteobacteria;o__Acetobacterales;f__Acetobacteraceae;g__Craurococcus-Caldovatus;	7.95507e-05	1.01253e-09	1.83714e-05	1.06068e-05	8.43775e-11	5.30338e-06	0.00711972
k__Bacteria;p__Firmicutes;c__Bacilli;o__Erysipelotrichales;f__Erysipelotrichaceae;g__Turicibacter;	8.48541e-05	1.09691e-09	1.91216e-05	5.30338e-06	8.43775e-11	5.30338e-06	0.00485211
k__Bacteria;p__Chloroflexi;c__KD4-96;o__KD4-96;f__KD4-96;g__KD4-96;	7.42473e-05	1.09691e-09	1.91216e-05	1.06068e-05	8.43775e-11	5.30338e-06	0.0120739
k__Bacteria;p__Chloroflexi;c__Anaerolineae;o__SJA-15;f__SJA-15;g__SJA-15;	6.36406e-05	1.77193e-09	2.43031e-05	1.06068e-05	8.43775e-11	5.30338e-06	0.0317905
k__Bacteria;p__Proteobacteria;c__Alphaproteobacteria;o__Rickettsiales;f__SM2D12;g__SM2D12;	6.89439e-05	1.60317e-09	2.31169e-05	0	0	0	0.0152658
k__Bacteria;p__Acidobacteriota;c__Acidobacteriae;o__Acidobacteriales;f__Koribacteraceae;g__Candidatus_Koribacter;	6.89439e-05	3.12197e-09	3.22592e-05	0	0	0	0.0310968
k__Bacteria;p__Actinobacteriota;c__Actinobacteria;o__Propionibacteriales;f__Nocardioidaceae;g__Aeromicrobium;	5.30338e-05	3.3751e-10	1.06068e-05	1.06068e-05	8.43775e-11	5.30338e-06	0.00748063
k__Bacteria;p__Proteobacteria;c__Alphaproteobacteria;o__Rhizobiales;f__Rhizobiaceae;g__Chelativorans;	5.83372e-05	5.90643e-10	1.40314e-05	5.30338e-06	8.43775e-11	5.30338e-06	0.00782746
k__Bacteria;p__Acidobacteriota;c__Acidobacteriae;o__Acidobacteriae;f__Acidobacteriae;g__Paludibaculum;	5.83372e-05	2.10944e-09	2.65169e-05	0	0	0	0.0287641
k__Bacteria;p__Firmicutes;c__Bacilli;o__Staphylococcales;f__Staphylococcaceae;g__Jeotgalicoccus;	5.83372e-05	5.90643e-10	1.40314e-05	0	0	0	0.00376585
k__Bacteria;p__Cyanobacteria;c__Cyanobacteriia;o__Cyanobacteriales;f__Chroococcidiopsaceae;g__Chroococcidiopsis_PCC_7203;	0	0	0	5.30338e-05	5.90643e-10	1.40314e-05	0.00677289
k__Bacteria;p__Planctomycetota;c__Planctomycetes;o__Pirellulales;f__Pirellulaceae;g__Pirellula;	4.77304e-05	2.53133e-10	9.18572e-06	5.30338e-06	8.43775e-11	5.30338e-06	0.00502465
k__Bacteria;p__Verrucomicrobiota;c__Verrucomicrobiae;o__Opitutales;f__Opitutaceae;g__Opitutus;	4.2427e-05	8.43775e-11	5.30338e-06	0	0	0	0.000549296
k__Bacteria;p__Firmicutes;c__Clostridia;o__Lachnospirales;f__Lachnospiraceae;g__Lachnospiraceae_UCG-010;	2.65169e-05	8.43775e-11	5.30338e-06	5.30338e-06	8.43775e-11	5.30338e-06	0.0167095
k__Bacteria;p__Proteobacteria;c__Gammaproteobacteria;o__Xanthomonadales;f__Xanthomonadaceae;g__Lysobacter;	2.12135e-05	3.3751e-10	1.06068e-05	0	0	0	0.0405757
k__Bacteria;p__Bacteroidota;c__Bacteroidia;o__Chitinophagales;f__Chitinophagaceae;g__Flavisolibacter;	2.12135e-05	3.3751e-10	1.06068e-05	0	0	0	0.0405757
k__Bacteria;p__Verrucomicrobiota;c__Chlamydiae;o__Chlamydiales;f__cvE6;g__cvE6;	2.12135e-05	3.3751e-10	1.06068e-05	0	0	0	0.0405757
k__Bacteria;p__Chloroflexi;c__Dehalococcoidia;o__S085;f__S085;g__S085;	2.12135e-05	3.3751e-10	1.06068e-05	0	0	0	0.0405757
k__Bacteria;p__Cyanobacteria;c__Cyanobacteriia;o__Leptolyngbyales;f__Leptolyngbyaceae;g__JSC-12;	2.12135e-05	3.3751e-10	1.06068e-05	0	0	0	0.0405757
k__Bacteria;p__Firmicutes;c__Clostridia;o__Clostridiales;f__Clostridiaceae;g__Clostridium_sensu_stricto_13;	0	0	0	2.12135e-05	3.3751e-10	1.06068e-05	0.0405757
k__Bacteria;p__Firmicutes;c__Clostridia;o__Lachnospirales;f__Lachnospiraceae;g__Lachnospiraceae_ND3007_group;	2.12135e-05	8.43775e-11	5.30338e-06	0	0	0	0.00502465
k__Bacteria;p__Chloroflexi;c__SHA-26;o__SHA-26;f__SHA-26;g__SHA-26;	2.12135e-05	3.3751e-10	1.06068e-05	0	0	0	0.0405757
k__Bacteria;p__Actinobacteriota;c__Actinobacteria;o__Pseudonocardiales;f__Pseudonocardiaceae;g__Amycolatopsis;	5.30338e-06	8.43775e-11	5.30338e-06	1.59101e-05	0	0	0.0405757

## Sheet: AeyM-vs-AlbM.psig
Table S5. Results of tests for significant differences in abundance of bacterial genera among mosquito species (arranged by life-stage and gender)
Statistical metrics were obtained from Metastats analysis in the genus with a p-value less than 0.05.
Taxa	mean(AeyM)	variance(AeyM)	standard error(AeyM)	mean(AlbM)	variance(AlbM)	standard error(AlbM)	p value
k__Bacteria;p__Proteobacteria;c__Alphaproteobacteria;o__Rickettsiales;f__Anaplasmataceae;g__Wolbachia;	0.0285958	0.000123858	0.00642541	0.700094	0.00398265	0.0364356	0.000217469
k__Bacteria;p__Proteobacteria;c__Gammaproteobacteria;o__Enterobacterales;f__Enterobacteriaceae;g__Escherichia-Shigella;	0.226735	0.0205177	0.0826997	0.00692621	3.26881e-05	0.00330091	0.0164403
k__Bacteria;p__Firmicutes;c__Bacilli;o__Erysipelotrichales;f__Erysipelotrichaceae;g__Clostridium_innocuum_group;	0.0948563	0.00427419	0.0377456	0.00293807	1.37039e-05	0.00213728	0.0237932
k__Bacteria;p__Firmicutes;c__Clostridia;o__Lachnospirales;f__Lachnospiraceae;g__Blautia;	0.060013	0.000127183	0.0065111	0.00475713	3.5249e-05	0.00342778	0.00152763
k__Bacteria;p__Proteobacteria;c__Gammaproteobacteria;o__Burkholderiales;f__Sutterellaceae;g__Parasutterella;	0.0466857	9.72511e-05	0.0056936	0.00254032	5.07716e-06	0.00130092	0.00133155
k__Bacteria;p__Firmicutes;c__Bacilli;o__Erysipelotrichales;f__Erysipelatoclostridiaceae;g__Coprobacillus;	0.0447552	0.000921726	0.0175283	0.00143191	3.54284e-06	0.00108671	0.0232246
k__Bacteria;p__Firmicutes;c__Clostridia;o__Peptostreptococcales-Tissierellales;f__Peptostreptococcaceae;g__Clostridioides;	0.0282246	0.000288872	0.00981278	0.00331461	1.2482e-05	0.00203978	0.0226346
k__Bacteria;p__Proteobacteria;c__Gammaproteobacteria;o__Enterobacterales;f__Enterobacteriaceae;g__Klebsiella;	0.0247615	0.000202851	0.00822295	0.000928091	5.9368e-07	0.000444852	0.0131604
k__Bacteria;p__Verrucomicrobiota;c__Verrucomicrobiae;o__Verrucomicrobiales;f__Akkermansiaceae;g__Akkermansia;	0.0200309	0.00020308	0.00822759	0.000355326	1.9044e-07	0.000251952	0.0253636
k__Bacteria;p__Proteobacteria;c__Gammaproteobacteria;o__Enterobacterales;f__Morganellaceae;g__Morganella;	0.0194899	0.000181079	0.00776914	0.000885664	5.88871e-07	0.000443047	0.0251676
k__Bacteria;p__Firmicutes;c__Bacilli;o__Lactobacillales;f__Enterococcaceae;g__Enterococcus;	0.0136032	7.07888e-05	0.0048576	0.00107659	1.67506e-06	0.000747231	0.0188378
k__Bacteria;p__Firmicutes;c__Bacilli;o__Erysipelotrichales;f__Erysipelotrichaceae;g__Dubosiella;	0.0106492	5.00115e-05	0.00408295	0.000562158	2.38029e-07	0.000281679	0.0234207
k__Bacteria;p__Proteobacteria;c__Gammaproteobacteria;o__Enterobacterales;f__Enterobacteriaceae;g__Citrobacter;	0.0100552	2.24503e-06	0.000865069	0.000275776	5.22297e-08	0.000131947	0.000413547
k__Bacteria;p__Proteobacteria;c__Gammaproteobacteria;o__Enterobacterales;f__Enterobacteriaceae;g__Kosakonia;	0.0067512	6.97389e-06	0.00152467	0.000350023	7.59398e-10	1.59101e-05	0.00555615
k__Bacteria;p__Firmicutes;c__Bacilli;o__Erysipelotrichales;f__Erysipelatoclostridiaceae;g__Erysipelatoclostridium;	0.00293807	4.03552e-06	0.00115982	0.000159101	4.9614e-08	0.0001286	0.0257326
k__Bacteria;p__Firmicutes;c__Clostridia;o__Clostridia_UCG-014;f__Clostridia_UCG-014;g__Clostridia_UCG-014;	0.00273124	1.87402e-07	0.000249935	0.000281079	9.62747e-08	0.000179141	0.00113547
k__Bacteria;p__Proteobacteria;c__Gammaproteobacteria;o__Enterobacterales;f__Morganellaceae;g__Providencia;	0.00237061	1.73143e-07	0.000240238	5.30338e-05	2.36257e-09	2.80628e-05	0.000762923
k__Bacteria;p__Proteobacteria;c__Gammaproteobacteria;o__Enterobacterales;f__Erwiniaceae;g__Pantoea;	0.000832631	3.85352e-07	0.0003584	2.65169e-05	1.09691e-09	1.91216e-05	0.0282157
k__Bacteria;p__Proteobacteria;c__Gammaproteobacteria;o__Enterobacterales;f__Morganellaceae;g__Proteus;	0.000822024	4.05096e-07	0.000367467	2.65169e-05	1.09691e-09	1.91216e-05	0.0323672
k__Bacteria;p__Actinobacteriota;c__Actinobacteria;o__Corynebacteriales;f__Corynebacteriaceae;g__Corynebacterium;	0.000684136	2.37185e-07	0.000281179	0.000121978	1.62849e-08	7.36769e-05	0.046631
k__Bacteria;p__Firmicutes;c__Bacilli;o__Bacillales;f__Bacillaceae;g__Bacillus;	0.000355326	1.09691e-09	1.91216e-05	0.000233349	5.90643e-10	1.40314e-05	0.00328342
k__Bacteria;p__Actinobacteriota;c__Actinobacteria;o__Propionibacteriales;f__Propionibacteriaceae;g__Cutibacterium;	0.000487911	1.53989e-07	0.00022656	3.71237e-05	4.1345e-09	3.71237e-05	0.0441872
k__Bacteria;p__Firmicutes;c__Bacilli;o__Staphylococcales;f__Staphylococcaceae;g__Staphylococcus;	0.000450787	2.16006e-08	8.48541e-05	6.89439e-05	1.42598e-08	6.89439e-05	0.00895544
k__Bacteria;p__Proteobacteria;c__Gammaproteobacteria;o__Burkholderiales;f__Methylophilaceae;g__Methylophilus;	0.000111371	2.27819e-09	2.75572e-05	0.000302293	2.75914e-08	9.59018e-05	0.0492923
k__Bacteria;p__Bacteroidota;c__Bacteroidia;o__Bacteroidales;f__Prevotellaceae;g__Prevotella;	0.000307596	1.07159e-08	5.97661e-05	2.65169e-05	1.09691e-09	1.91216e-05	0.0048574
k__Bacteria;p__Firmicutes;c__Clostridia;o__Lachnospirales;f__Lachnospiraceae;g__Lachnospira;	0.000121978	2.10944e-09	2.65169e-05	3.18203e-05	1.01253e-09	1.83714e-05	0.0133565
k__Bacteria;p__Bacteroidota;c__Bacteroidia;o__Chitinophagales;f__Chitinophagaceae;g__Parasegetibacter;	3.71237e-05	5.90643e-10	1.40314e-05	0.000111371	1.77193e-09	2.43031e-05	0.0166364
k__Bacteria;p__Patescibacteria;c__Saccharimonadia;o__Saccharimonadales;f__Saccharimonadaceae;g__Candidatus_Saccharimonas;	0.000143191	7.84711e-09	5.11439e-05	5.30338e-06	8.43775e-11	5.30338e-06	0.0157469
k__Bacteria;p__Proteobacteria;c__Alphaproteobacteria;o__SAR11_clade;f__Clade_I;g__Clade_Ia;	0.000137888	1.35004e-09	2.12135e-05	0	0	0	0.00205348
k__Bacteria;p__Acidobacteriota;c__Acidobacteriae;o__Subgroup_2;f__Subgroup_2;g__Subgroup_2;	0.000100764	6.41269e-09	4.62338e-05	0	0	0	0.0312995
k__Bacteria;p__Firmicutes;c__Bacilli;o__Staphylococcales;f__Gemellaceae;g__Gemella;	7.95507e-05	3.29072e-09	3.31196e-05	1.06068e-05	3.3751e-10	1.06068e-05	0.0423512
k__Bacteria;p__Firmicutes;c__Bacilli;o__Paenibacillales;f__Paenibacillaceae;g__Paenibacillus;	0	0	0	6.36406e-05	1.77193e-09	2.43031e-05	0.0173529
k__Bacteria;p__Firmicutes;c__Bacilli;o__Erysipelotrichales;f__Erysipelotrichaceae;g__Faecalibaculum;	5.30338e-05	3.3751e-10	1.06068e-05	5.30338e-06	8.43775e-11	5.30338e-06	0.00606774
k__Bacteria;p__Planctomycetota;c__Phycisphaerae;o__Tepidisphaerales;f__Tepidisphaeraceae;g__Tepidisphaeraceae;	5.30338e-05	2.10944e-09	2.65169e-05	0	0	0	0.0387005
k__Bacteria;p__Firmicutes;c__Clostridia;o__Clostridiales;f__Clostridiaceae;g__Clostridium_sensu_stricto_5;	4.77304e-05	7.59398e-10	1.59101e-05	5.30338e-06	8.43775e-11	5.30338e-06	0.0191872
k__Bacteria;p__Proteobacteria;c__Gammaproteobacteria;o__Pasteurellales;f__Pasteurellaceae;g__Aggregatibacter;	4.77304e-05	2.53133e-10	9.18572e-06	0	0	0	0.00308734
k__Bacteria;p__Actinobacteriota;c__Actinobacteria;o__Pseudonocardiales;f__Pseudonocardiaceae;g__Amycolatopsis;	3.18203e-05	2.53133e-10	9.18572e-06	5.30338e-06	8.43775e-11	5.30338e-06	0.0198895
k__Bacteria;p__Proteobacteria;c__Gammaproteobacteria;o__Burkholderiales;f__Nitrosomonadaceae;g__mle1-7;	2.65169e-05	8.43775e-11	5.30338e-06	1.06068e-05	8.43775e-11	5.30338e-06	0.0336952
k__Bacteria;p__Proteobacteria;c__Gammaproteobacteria;o__Burkholderiales;f__Rhodocyclaceae;g__Zoogloea;	3.18203e-05	7.59398e-10	1.59101e-05	0	0	0	0.0387005
