# Supplementary material for: Microbiome Composition and Microbial Community Structure in Mosquito Vectors Aedes aegypti and Aedes albopictus in Northeastern Thailand, a Dengue-Endemic Area
Source: Insects. 2023 Feb 13;14(2):184. doi: 10.3390/insects14020184 (PMC9961164; doi:10.3390/insects14020184)
Supplement: Supplementary file 1 [file insects-14-00184-s001.zip › Table S6_28-12-22.xlsx]

## Sheet: AeyL-vs-AeyF.psig
Table S6. Results of tests for significant differences in abundance of bacterial genera between larval and adult mosquitoes.
Statistical metrics were obtained from Metastats analysis in the genus with a p-value less than 0.05.
Taxa	mean(AeyL)	variance(AeyL)	standard error(AeyL)	mean(AeyF)	variance(AeyF)	standard error(AeyF)	p value
k__Bacteria;p__Proteobacteria;c__Alphaproteobacteria;o__Rickettsiales;f__Anaplasmataceae;g__Wolbachia;	0.0116515	0.000299151	0.00998585	0.0584167	0.000864953	0.0169799	0.030683
k__Bacteria;p__Proteobacteria;c__Gammaproteobacteria;o__Burkholderiales;f__Comamonadaceae;g__Aquabacterium;	0.0445219	0.00118029	0.019835	0.00113492	2.72025e-06	0.000952234	0.0376561
k__Bacteria;p__Firmicutes;c__Clostridia;o__Lachnospirales;f__Lachnospiraceae;g__Blautia;	0.00263578	4.61823e-06	0.00124073	0.0278003	0.000399395	0.0115383	0.0381078
k__Bacteria;p__Firmicutes;c__Clostridia;o__Peptostreptococcales-Tissierellales;f__Peptostreptococcaceae;g__Clostridioides;	0.00277367	6.44129e-06	0.0014653	0.0200574	0.000198142	0.00812695	0.0415135
k__Bacteria;p__Proteobacteria;c__Alphaproteobacteria;o__Rhizobiales;f__Rhizobiaceae;g__Shinella;	0.00285852	2.6919e-06	0.000947258	0.00715956	1.11229e-05	0.00192552	0.0459921
k__Bacteria;p__Nitrospirota;c__Nitrospiria;o__Nitrospirales;f__Nitrospiraceae;g__Nitrospira;	0.000159101	1.59474e-08	7.29094e-05	0.00677772	1.93851e-05	0.00254199	0.0229762
k__Bacteria;p__Firmicutes;c__Bacilli;o__Erysipelotrichales;f__Erysipelotrichaceae;g__Dubosiella;	0.000673529	4.57242e-07	0.000390402	0.00545187	1.60705e-05	0.00231448	0.0437591
k__Bacteria;p__Proteobacteria;c__Alphaproteobacteria;o__Reyranellales;f__Reyranellaceae;g__Reyranella;	0.000312899	1.88162e-08	7.91963e-05	0.00543596	1.466e-05	0.00221058	0.0330903
k__Bacteria;p__Proteobacteria;c__Alphaproteobacteria;o__Rhizobiales;f__Beijerinckiaceae;g__Bosea;	0.000588675	1.32895e-07	0.000210471	0.00424801	4.08733e-06	0.00116724	0.0171743
k__Bacteria;p__Proteobacteria;c__Alphaproteobacteria;o__Rhizobiales;f__Rhizobiaceae;g__Allorhizobium-Neorhizobium-Pararhizobium-Rhizobium;	0.00344189	4.10438e-06	0.00116967	0.000731866	2.11872e-07	0.000265752	0.0353708
k__Bacteria;p__Acidobacteriota;c__Vicinamibacteria;o__Vicinamibacterales;f__Vicinamibacteraceae;g__Vicinamibacteraceae;	0.000106068	8.69088e-09	5.38234e-05	0.00337825	5.00603e-06	0.00129177	0.0245166
k__Bacteria;p__Proteobacteria;c__Alphaproteobacteria;o__Sphingomonadales;f__Sphingomonadaceae;g__Sphingomonas;	0.000217439	5.37485e-08	0.000133851	0.0031396	1.42674e-06	0.000689623	0.00730428
k__Bacteria;p__Proteobacteria;c__Gammaproteobacteria;o__Burkholderiales;f__Comamonadaceae;g__Hydrogenophaga;	0.0025032	2.09349e-06	0.000835362	0.000275776	1.88162e-08	7.91963e-05	0.0222345
k__Bacteria;p__Acidobacteriota;c__Acidobacteriae;o__Bryobacterales;f__Bryobacteraceae;g__Bryobacter;	9.01575e-05	8.18462e-09	5.22322e-05	0.00244486	2.43319e-06	0.000900591	0.0226751
k__Bacteria;p__Proteobacteria;c__Gammaproteobacteria;o__Xanthomonadales;f__Xanthomonadaceae;g__Stenotrophomonas;	9.54608e-05	1.54411e-08	7.17428e-05	0.00220621	1.22018e-06	0.000637752	0.013962
k__Bacteria;p__Proteobacteria;c__Alphaproteobacteria;o__Rhizobiales;f__Devosiaceae;g__Devosia;	0.000121978	2.43851e-08	9.01575e-05	0.00182967	1.43096e-06	0.000690642	0.0270396
k__Bacteria;p__Proteobacteria;c__Gammaproteobacteria;o__Xanthomonadales;f__Xanthomonadaceae;g__Pseudoxanthomonas;	0.000212135	5.93174e-08	0.000140615	0.00170238	1.07024e-06	0.000597284	0.0284342
k__Bacteria;p__Firmicutes;c__Bacilli;o__Erysipelotrichales;f__Erysipelatoclostridiaceae;g__Erysipelatoclostridium;	0.000190922	3.64511e-08	0.000110229	0.0017183	1.68384e-06	0.000749186	0.0447147
k__Bacteria;p__Proteobacteria;c__Alphaproteobacteria;o__Caulobacterales;f__Caulobacteraceae;g__Phenylobacterium;	7.95507e-05	1.77193e-09	2.43031e-05	0.00178194	3.47045e-07	0.00034012	0.00434073
k__Bacteria;p__Proteobacteria;c__Alphaproteobacteria;o__Caulobacterales;f__Hyphomonadaceae;g__Hirschia;	0.000153798	2.46382e-08	9.06242e-05	0.00169178	5.67861e-08	0.000137582	0.000622821
k__Bacteria;p__Myxococcota;c__Polyangia;o__Polyangiales;f__BIrii41;g__BIrii41;	2.65169e-05	2.10944e-09	2.65169e-05	0.00180845	2.12058e-06	0.000840749	0.0409334
k__Bacteria;p__Cyanobacteria;c__Cyanobacteriia;o__Chloroplast;f__Chloroplast;g__Chloroplast;	0.00151146	8.67991e-07	0.000537895	0.000318203	1.15682e-07	0.000196368	0.041664
k__Bacteria;p__Proteobacteria;c__Alphaproteobacteria;o__Rhizobiales;f__Xanthobacteraceae;g__Ancylobacter;	5.30338e-06	8.43775e-11	5.30338e-06	0.00177133	7.77708e-07	0.000509152	0.0113249
k__Bacteria;p__Bacteroidota;c__Bacteroidia;o__Bacteroidales;f__Dysgonomonadaceae;g__Dysgonomonas;	0.0017183	5.01456e-07	0.000408842	0	0	0	0.00715372
k__Bacteria;p__Actinobacteriota;c__Actinobacteria;o__Bifidobacteriales;f__Bifidobacteriaceae;g__Bifidobacterium;	0.000148495	1.04628e-08	5.90559e-05	0.00151146	1.18542e-06	0.000628602	0.0382583
k__Bacteria;p__Armatimonadota;c__Fimbriimonadia;o__Fimbriimonadales;f__Fimbriimonadaceae;g__Fimbriimonadaceae;	6.36406e-05	2.27819e-09	2.75572e-05	0.00149025	1.49584e-06	0.000706127	0.0445642
k__Bacteria;p__Proteobacteria;c__Alphaproteobacteria;o__Azospirillales;f__Azospirillaceae;g__Azospirillum;	0.00152737	1.12619e-06	0.000612695	2.65169e-05	1.09691e-09	1.91216e-05	0.0274929
k__Bacteria;p__Firmicutes;c__Clostridia;o__Clostridia_UCG-014;f__Clostridia_UCG-014;g__Clostridia_UCG-014;	0.000185618	6.66582e-09	4.71375e-05	0.00132584	9.44269e-07	0.000561031	0.0442345
k__Bacteria;p__Verrucomicrobiota;c__Verrucomicrobiae;o__Pedosphaerales;f__Pedosphaeraceae;g__Pedosphaeraceae;	2.12135e-05	8.43775e-11	5.30338e-06	0.00132584	1.2093e-06	0.000634901	0.0428177
k__Bacteria;p__Firmicutes;c__Clostridia;o__Oscillospirales;f__Ruminococcaceae;g__Subdoligranulum;	7.95507e-05	6.32831e-09	4.59286e-05	0.00117735	3.58689e-07	0.000345779	0.0162615
k__Bacteria;p__Bacteroidota;c__Bacteroidia;o__Flavobacteriales;f__Weeksellaceae;g__Chryseobacterium;	0.000917485	3.246e-07	0.000328938	9.54608e-05	7.59398e-10	1.59101e-05	0.0261331
k__Bacteria;p__Proteobacteria;c__Gammaproteobacteria;o__R7C24;f__R7C24;g__R7C24;	3.18203e-05	1.01253e-09	1.83714e-05	0.000880361	2.3727e-07	0.000281229	0.0181204
k__Bacteria;p__Firmicutes;c__Clostridia;o__Lachnospirales;f__Lachnospiraceae;g__Dorea;	3.71237e-05	1.09691e-09	1.91216e-05	0.000869754	3.04856e-07	0.000318777	0.0228257
k__Bacteria;p__Firmicutes;c__Clostridia;o__Lachnospirales;f__Lachnospiraceae;g__Ruminococcus_torques_group;	0.000106068	2.46382e-08	9.06242e-05	0.0007849	1.77783e-07	0.000243436	0.0225246
k__Bacteria;p__Firmicutes;c__Clostridia;o__Lachnospirales;f__Lachnospiraceae;g__Eubacterium_hallii_group;	4.77304e-05	1.77193e-09	2.43031e-05	0.00080081	1.99806e-07	0.000258074	0.0195578
k__Bacteria;p__Proteobacteria;c__Gammaproteobacteria;o__Pseudomonadales;f__Moraxellaceae;g__Alkanindiges;	0.000832631	1.25638e-07	0.000204645	0	0	0	0.00760063
k__Bacteria;p__Proteobacteria;c__Gammaproteobacteria;o__Diplorickettsiales;f__Diplorickettsiaceae;g__Aquicella;	0	0	0	0.00081672	1.87656e-07	0.000250104	0.0145927
k__Bacteria;p__Firmicutes;c__Clostridia;o__Lachnospirales;f__Lachnospiraceae;g__Anaerostipes;	9.01575e-05	5.90643e-10	1.40314e-05	0.000726563	1.79555e-07	0.000244646	0.0240761
k__Bacteria;p__Bacteroidota;c__Bacteroidia;o__Cytophagales;f__Spirosomaceae;g__Runella;	0.000641709	7.75429e-08	0.000160772	0.000169708	2.38788e-08	8.92167e-05	0.0242266
k__Bacteria;p__Proteobacteria;c__Alphaproteobacteria;o__Sphingomonadales;f__Sphingomonadaceae;g__Sphingobium;	9.54608e-05	4.05012e-09	3.67429e-05	0.00070535	2.26132e-08	8.68201e-05	0.00156735
k__Bacteria;p__Bacteroidota;c__Bacteroidia;o__Cytophagales;f__Spirosomaceae;g__Emticicia;	0.000668226	2.96165e-08	9.93588e-05	0.000121978	6.66582e-09	4.71375e-05	0.00449128
k__Bacteria;p__Proteobacteria;c__Gammaproteobacteria;o__Burkholderiales;f__Chromobacteriaceae;g__Vogesella;	0.000779597	1.44286e-08	6.93507e-05	0	0	0	0.000139461
k__Bacteria;p__Proteobacteria;c__Gammaproteobacteria;o__Burkholderiales;f__Nitrosomonadaceae;g__Nitrosomonas;	0	0	0	0.00076899	3.30169e-07	0.000331747	0.0329398
k__Bacteria;p__Firmicutes;c__Clostridia;o__Lachnospirales;f__Lachnospiraceae;g__Fusicatenibacter;	5.30338e-05	6.15956e-09	4.53121e-05	0.000657619	2.03856e-07	0.000260676	0.0346292
k__Bacteria;p__Proteobacteria;c__Alphaproteobacteria;o__Rhizobiales;f__Beijerinckiaceae;g__Methylobacterium-Methylorubrum;	9.01575e-05	1.35004e-09	2.12135e-05	0.000546248	6.08362e-08	0.000142403	0.0158273
k__Bacteria;p__Bacteroidota;c__Bacteroidia;o__Flavobacteriales;f__Crocinitomicaceae;g__Fluviicola;	0.000578068	1.51205e-07	0.000224503	4.2427e-05	5.90643e-10	1.40314e-05	0.0303867
k__Bacteria;p__Proteobacteria;c__Gammaproteobacteria;o__Gammaproteobacteria_Incertae_Sedis;f__Unknown_Family;g__Acidibacter;	6.36406e-05	5.31578e-09	4.20943e-05	0.000551552	6.13425e-08	0.000142995	0.0144422
k__Bacteria;p__Proteobacteria;c__Gammaproteobacteria;o__Burkholderiales;f__Oxalobacteraceae;g__Undibacterium;	0.000562158	7.90617e-08	0.000162339	4.77304e-05	4.80952e-09	4.00396e-05	0.0173249
k__Bacteria;p__Proteobacteria;c__Gammaproteobacteria;o__Burkholderiales;f__Nitrosomonadaceae;g__MND1;	0	0	0	0.000599282	1.31713e-07	0.000209534	0.020206
k__Bacteria;p__Proteobacteria;c__Alphaproteobacteria;o__Sphingomonadales;f__Sphingomonadaceae;g__Croceicoccus;	3.71237e-05	4.1345e-09	3.71237e-05	0.000525035	8.37869e-08	0.00016712	0.0203566
k__Bacteria;p__Proteobacteria;c__Alphaproteobacteria;o__Caulobacterales;f__Caulobacteraceae;g__Asticcacaulis;	6.36406e-05	4.05012e-09	3.67429e-05	0.000482608	8.86808e-08	0.000171931	0.0302361
k__Bacteria;p__Proteobacteria;c__Gammaproteobacteria;o__Burkholderiales;f__SC-I-84;g__SC-I-84;	4.2427e-05	1.60317e-09	2.31169e-05	0.000371237	3.95731e-08	0.000114852	0.020851
k__Bacteria;p__Proteobacteria;c__Gammaproteobacteria;o__Burkholderiales;f__Comamonadaceae;g__Variovorax;	7.42473e-05	8.43775e-11	5.30338e-06	0.000339416	3.40041e-08	0.000106465	0.0264342
k__Bacteria;p__Actinobacteriota;c__Actinobacteria;o__Frankiales;f__Frankiales;g__Frankiales;	1.59101e-05	7.59398e-10	1.59101e-05	0.000397753	9.13808e-08	0.000174529	0.0379572
k__Bacteria;p__Bacteroidota;c__Kapabacteria;o__Kapabacteriales;f__Kapabacteriales;g__Kapabacteriales;	1.06068e-05	8.43775e-11	5.30338e-06	0.000371237	6.69114e-08	0.000149345	0.0289144
k__Bacteria;p__Proteobacteria;c__Alphaproteobacteria;o__Sphingomonadales;f__Sphingomonadaceae;g__Erythrobacter;	5.30338e-06	8.43775e-11	5.30338e-06	0.000323506	2.18538e-08	8.53498e-05	0.00944057
k__Bacteria;p__Actinobacteriota;c__Thermoleophilia;o__Solirubrobacterales;f__67-14;g__67-14;	6.36406e-05	1.77193e-09	2.43031e-05	0.000259866	2.0335e-08	8.23306e-05	0.0341395
k__Bacteria;p__Bacteroidota;c__Bacteroidia;o__Cytophagales;f__Spirosomaceae;g__Arcicella;	0.000302293	4.42982e-08	0.000121516	0	0	0	0.0262837
k__Bacteria;p__Proteobacteria;c__Gammaproteobacteria;o__Coxiellales;f__Coxiellaceae;g__Coxiella;	5.30338e-06	8.43775e-11	5.30338e-06	0.000286383	4.32857e-08	0.000120119	0.0317005
k__Bacteria;p__Proteobacteria;c__Gammaproteobacteria;o__Burkholderiales;f__TRA3-20;g__TRA3-20;	1.59101e-05	2.53133e-10	9.18572e-06	0.000270472	1.54411e-08	7.17428e-05	0.0108906
k__Bacteria;p__Firmicutes;c__Bacilli;o__Erysipelotrichales;f__Erysipelatoclostridiaceae;g__Erysipelotrichaceae_UCG-003;	1.06068e-05	3.3751e-10	1.06068e-05	0.000270472	2.30351e-08	8.76262e-05	0.018748
k__Bacteria;p__Proteobacteria;c__Gammaproteobacteria;o__Burkholderiales;f__Nitrosomonadaceae;g__oc32;	1.06068e-05	3.3751e-10	1.06068e-05	0.000270472	4.80952e-09	4.00396e-05	0.00171791
k__Bacteria;p__Bacteroidota;c__Bacteroidia;o__Chitinophagales;f__Chitinophagaceae;g__Dinghuibacter;	6.36406e-05	2.53133e-10	9.18572e-06	0.000217439	1.42598e-08	6.89439e-05	0.0373677
k__Bacteria;p__Proteobacteria;c__Alphaproteobacteria;o__Rhizobiales;f__Rhizobiaceae;g__Ochrobactrum;	3.18203e-05	7.59398e-10	1.59101e-05	0.000238652	2.12631e-08	8.41885e-05	0.0287639
k__Bacteria;p__Firmicutes;c__Negativicutes;o__Veillonellales-Selenomonadales;f__Veillonellaceae;g__Veillonella;	5.30338e-05	1.09691e-09	1.91216e-05	0.000206832	1.31629e-08	6.62392e-05	0.0361933
k__Bacteria;p__Proteobacteria;c__Alphaproteobacteria;o__Rhizobiales;f__Rhizobiaceae;g__Aureimonas;	5.30338e-05	4.38763e-09	3.82432e-05	0.000180315	3.62823e-09	3.47766e-05	0.0267227
k__Bacteria;p__Firmicutes;c__Clostridia;o__Lachnospirales;f__Lachnospiraceae;g__Roseburia;	4.2427e-05	1.09691e-09	1.91216e-05	0.000190922	7.08771e-09	4.86063e-05	0.0205071
k__Bacteria;p__Chloroflexi;c__Chloroflexia;o__Thermomicrobiales;f__JG30-KF-CM45;g__JG30-KF-CM45;	3.18203e-05	1.01253e-09	1.83714e-05	0.000190922	7.84711e-09	5.11439e-05	0.0188986
k__Bacteria;p__Actinobacteriota;c__Actinobacteria;o__Propionibacteriales;f__Nocardioidaceae;g__Nocardioides;	5.30338e-05	1.60317e-09	2.31169e-05	0.000132584	2.10944e-09	2.65169e-05	0.0352203
k__Bacteria;p__Acidobacteriota;c__Blastocatellia;o__11-24;f__11-24;g__11-24;	0	0	0	0.000159101	1.44286e-08	6.93507e-05	0.0338384
k__Bacteria;p__Actinobacteriota;c__Coriobacteriia;o__Coriobacteriales;f__Coriobacteriaceae;g__Collinsella;	1.06068e-05	3.3751e-10	1.06068e-05	0.000137888	1.12222e-08	6.11616e-05	0.0429683
k__Bacteria;p__Acidobacteriota;c__Acidobacteriae;o__Elev-16S-1166;f__Elev-16S-1166;g__Elev-16S-1166;	5.30338e-06	8.43775e-11	5.30338e-06	0.000127281	4.05012e-09	3.67429e-05	0.0141125
k__Bacteria;p__Firmicutes;c__Clostridia;o__Clostridiales;f__Clostridiaceae;g__Clostridium_sensu_stricto_5;	0.000121978	7.67835e-09	5.0591e-05	5.30338e-06	8.43775e-11	5.30338e-06	0.0339889
k__Bacteria;p__Proteobacteria;c__Gammaproteobacteria;o__Burkholderiales;f__Comamonadaceae;g__Pseudorhodoferax;	1.06068e-05	8.43775e-11	5.30338e-06	0.000111371	6.32831e-09	4.59286e-05	0.0378067
k__Bacteria;p__Proteobacteria;c__Gammaproteobacteria;o__Burkholderiales;f__Chitinimonadaceae;g__Chitinimonas;	0.000100764	2.36257e-09	2.80628e-05	0	0	0	0.00996355
k__Bacteria;p__Firmicutes;c__Bacilli;o__Erysipelotrichales;f__Erysipelotrichaceae;g__Turicibacter;	1.59101e-05	2.53133e-10	9.18572e-06	8.48541e-05	1.09691e-09	1.91216e-05	0.0147433
k__Bacteria;p__Firmicutes;c__Bacilli;o__Erysipelotrichales;f__Erysipelotrichaceae;g__ZOR0006;	9.54608e-05	7.59398e-10	1.59101e-05	0	0	0	0.00222821
k__Bacteria;p__Chloroflexi;c__KD4-96;o__KD4-96;f__KD4-96;g__KD4-96;	1.59101e-05	7.59398e-10	1.59101e-05	7.42473e-05	1.09691e-09	1.91216e-05	0.0309794
k__Bacteria;p__Firmicutes;c__Clostridia;o__Lachnospirales;f__Lachnospiraceae;g__Lachnospira;	0	0	0	7.95507e-05	3.29072e-09	3.31196e-05	0.0292583
k__Bacteria;p__Firmicutes;c__Clostridia;o__Clostridiales;f__Clostridiaceae;g__Clostridium_sensu_stricto_8;	1.06068e-05	3.3751e-10	1.06068e-05	6.36406e-05	1.01253e-09	1.83714e-05	0.0254945
k__Bacteria;p__Cyanobacteria;c__Cyanobacteriia;o__Phormidesmiales;f__Nodosilineaceae;g__Nodosilinea_PCC-7104;	6.36406e-05	1.01253e-09	1.83714e-05	0	0	0	0.011645
k__Bacteria;p__Proteobacteria;c__Gammaproteobacteria;o__Alteromonadales;f__Alteromonadaceae;g__Alteromonas;	0	0	0	6.36406e-05	2.27819e-09	2.75572e-05	0.0333788
k__Bacteria;p__Proteobacteria;c__Alphaproteobacteria;o__Paracaedibacterales;f__Paracaedibacteraceae;g__Candidatus_Finniella;	5.83372e-05	5.90643e-10	1.40314e-05	5.30338e-06	8.43775e-11	5.30338e-06	0.010439
k__Bacteria;p__Proteobacteria;c__Alphaproteobacteria;o__Rhizobiales;f__Rhizobiaceae;g__Chelativorans;	5.30338e-06	8.43775e-11	5.30338e-06	5.83372e-05	5.90643e-10	1.40314e-05	0.010439
k__Bacteria;p__Firmicutes;c__Bacilli;o__Staphylococcales;f__Staphylococcaceae;g__Jeotgalicoccus;	5.30338e-06	8.43775e-11	5.30338e-06	5.83372e-05	5.90643e-10	1.40314e-05	0.010439
k__Bacteria;p__Proteobacteria;c__Alphaproteobacteria;o__Rhodospirillales;f__Rhodospirillaceae;g__Novispirillum;	5.30338e-05	1.09691e-09	1.91216e-05	0	0	0	0.0211474
k__Bacteria;p__Actinobacteriota;c__Rubrobacteria;o__Rubrobacterales;f__Rubrobacteriaceae;g__Rubrobacter;	5.30338e-05	5.90643e-10	1.40314e-05	0	0	0	0.00929002
k__Bacteria;p__Planctomycetota;c__Planctomycetes;o__Pirellulales;f__Pirellulaceae;g__Pirellula;	5.30338e-06	8.43775e-11	5.30338e-06	4.77304e-05	2.53133e-10	9.18572e-06	0.00791442
k__Bacteria;p__Patescibacteria;c__Gracilibacteria;o__JGI_0000069-P22;f__JGI_0000069-P22;g__JGI_0000069-P22;	4.77304e-05	2.53133e-10	9.18572e-06	0	0	0	0.00328368
k__Bacteria;p__Proteobacteria;c__Gammaproteobacteria;o__Burkholderiales;f__Comamonadaceae;g__Mitsuaria;	4.77304e-05	1.01253e-09	1.83714e-05	0	0	0	0.0231268
k__Bacteria;p__Actinobacteriota;c__Coriobacteriia;o__OPB41;f__OPB41;g__OPB41;	4.77304e-05	1.01253e-09	1.83714e-05	0	0	0	0.0231268
k__Bacteria;p__Verrucomicrobiota;c__Verrucomicrobiae;o__Opitutales;f__Opitutaceae;g__Opitutus;	5.30338e-06	8.43775e-11	5.30338e-06	4.2427e-05	8.43775e-11	5.30338e-06	0.00478764
k__Bacteria;p__Proteobacteria;c__Gammaproteobacteria;o__Burkholderiales;f__Oxalobacteraceae;g__Massilia;	0	0	0	4.2427e-05	1.35004e-09	2.12135e-05	0.0461426
k__Bacteria;p__Cyanobacteria;c__Cyanobacteriia;o__Cyanobacteriales;f__Microcystaceae;g__Microcystis_PCC-7914;	3.18203e-05	2.53133e-10	9.18572e-06	0	0	0	0.011645
k__Bacteria;p__Bacteroidota;c__Ignavibacteria;o__Ignavibacteriales;f__PHOS-HE36;g__PHOS-HE36;	3.18203e-05	7.59398e-10	1.59101e-05	0	0	0	0.0461426
k__Bacteria;p__Firmicutes;c__Clostridia;o__Lachnospirales;f__Lachnospiraceae;g__Lachnospiraceae_UCG-010;	0	0	0	2.65169e-05	8.43775e-11	5.30338e-06	0.00358003
k__Bacteria;p__Proteobacteria;c__Gammaproteobacteria;o__Burkholderiales;f__Rhodocyclaceae;g__Uliginosibacterium;	2.12135e-05	3.3751e-10	1.06068e-05	0	0	0	0.0461426
k__Bacteria;p__Verrucomicrobiota;c__Chlamydiae;o__Chlamydiales;f__cvE6;g__cvE6;	0	0	0	2.12135e-05	3.3751e-10	1.06068e-05	0.0461426
k__Bacteria;p__Proteobacteria;c__Gammaproteobacteria;o__Burkholderiales;f__Comamonadaceae;g__Simplicispira;	0	0	0	2.12135e-05	3.3751e-10	1.06068e-05	0.0461426
k__Bacteria;p__Firmicutes;c__Clostridia;o__Lachnospirales;f__Lachnospiraceae;g__Lachnospiraceae_ND3007_group;	0	0	0	2.12135e-05	8.43775e-11	5.30338e-06	0.00791442
k__Bacteria;p__Actinobacteriota;c__Actinobacteria;o__Micrococcales;f__Intrasporangiaceae;g__Oryzihumus;	2.12135e-05	3.3751e-10	1.06068e-05	0	0	0	0.0461426
k__Bacteria;p__Fusobacteriota;c__Fusobacteriia;o__Fusobacteriales;f__Leptotrichiaceae;g__Leptotrichia;	2.12135e-05	3.3751e-10	1.06068e-05	0	0	0	0.0461426
k__Bacteria;p__Proteobacteria;c__Gammaproteobacteria;o__Xanthomonadales;f__Xanthomonadaceae;g__Luteimonas;	1.59101e-05	0	0	5.30338e-06	8.43775e-11	5.30338e-06	0.0461426

## Sheet: AeyL-vs-AeyM.psig
Table S6. Results of tests for significant differences in abundance of bacterial genera between larval and adult mosquitoes.
Statistical metrics were obtained from Metastats analysis in the genus with a p-value less than 0.05.
Taxa	mean(AeyL)	variance(AeyL)	standard error(AeyL)	mean(AeyM)	variance(AeyM)	standard error(AeyM)	p value
k__Bacteria;p__Proteobacteria;c__Gammaproteobacteria;o__Enterobacterales;f__Enterobacteriaceae;g__Escherichia-Shigella;	0.0102355	4.97108e-05	0.00407066	0.226735	0.0205177	0.0826997	0.0294206
k__Bacteria;p__Firmicutes;c__Bacilli;o__Erysipelotrichales;f__Erysipelotrichaceae;g__Clostridium_innocuum_group;	0.00319263	9.64975e-06	0.00179348	0.0948563	0.00427419	0.0377456	0.0365323
k__Bacteria;p__Firmicutes;c__Clostridia;o__Lachnospirales;f__Lachnospiraceae;g__Blautia;	0.00263578	4.61823e-06	0.00124073	0.060013	0.000127183	0.0065111	0.0015445
k__Bacteria;p__Proteobacteria;c__Gammaproteobacteria;o__Burkholderiales;f__Sutterellaceae;g__Parasutterella;	0.00350553	1.01077e-05	0.00183554	0.0466857	9.72511e-05	0.0056936	0.00209424
k__Bacteria;p__Proteobacteria;c__Gammaproteobacteria;o__Burkholderiales;f__Comamonadaceae;g__Aquabacterium;	0.0445219	0.00118029	0.019835	0.00196755	2.86301e-06	0.000976902	0.0457435
k__Bacteria;p__Firmicutes;c__Bacilli;o__Erysipelotrichales;f__Erysipelatoclostridiaceae;g__Coprobacillus;	0.00154859	2.43142e-06	0.000900263	0.0447552	0.000921726	0.0175283	0.0352897
k__Bacteria;p__Firmicutes;c__Clostridia;o__Peptostreptococcales-Tissierellales;f__Peptostreptococcaceae;g__Clostridioides;	0.00277367	6.44129e-06	0.0014653	0.0282246	0.000288872	0.00981278	0.0316318
k__Bacteria;p__Proteobacteria;c__Gammaproteobacteria;o__Enterobacterales;f__Enterobacteriaceae;g__Klebsiella;	0.00121978	1.35333e-06	0.000671647	0.0247615	0.000202851	0.00822295	0.0231169
k__Bacteria;p__Verrucomicrobiota;c__Verrucomicrobiae;o__Verrucomicrobiales;f__Akkermansiaceae;g__Akkermansia;	0.00042427	1.64621e-07	0.000234251	0.0200309	0.00020308	0.00822759	0.0375637
k__Bacteria;p__Proteobacteria;c__Gammaproteobacteria;o__Enterobacterales;f__Morganellaceae;g__Morganella;	0.000949305	7.15437e-07	0.000488343	0.0194899	0.000181079	0.00776914	0.0377574
k__Bacteria;p__Firmicutes;c__Bacilli;o__Lactobacillales;f__Enterococcaceae;g__Enterococcus;	0.00105007	9.79876e-07	0.000571511	0.0136032	7.07888e-05	0.0048576	0.031438
k__Bacteria;p__Firmicutes;c__Bacilli;o__Erysipelotrichales;f__Erysipelotrichaceae;g__Dubosiella;	0.000673529	4.57242e-07	0.000390402	0.0106492	5.00115e-05	0.00408295	0.0363386
k__Bacteria;p__Proteobacteria;c__Gammaproteobacteria;o__Aeromonadales;f__Aeromonadaceae;g__Aeromonas;	0.000323506	5.27359e-08	0.000132584	0.0109409	1.29205e-05	0.00207529	0.00523386
k__Bacteria;p__Proteobacteria;c__Gammaproteobacteria;o__Enterobacterales;f__Enterobacteriaceae;g__Citrobacter;	0.00039245	2.33726e-08	8.82658e-05	0.0100552	2.24503e-06	0.000865069	0.000385689
k__Bacteria;p__Proteobacteria;c__Gammaproteobacteria;o__Enterobacterales;f__Enterobacteriaceae;g__Kosakonia;	0.000318203	7.08771e-09	4.86063e-05	0.0067512	6.97389e-06	0.00152467	0.00984642
k__Bacteria;p__Proteobacteria;c__Alphaproteobacteria;o__Rhizobiales;f__Rhizobiaceae;g__Allorhizobium-Neorhizobium-Pararhizobium-Rhizobium;	0.00344189	4.10438e-06	0.00116967	0.000371237	8.13399e-08	0.000164661	0.0299668
k__Bacteria;p__Firmicutes;c__Bacilli;o__Erysipelotrichales;f__Erysipelatoclostridiaceae;g__Erysipelatoclostridium;	0.000190922	3.64511e-08	0.000110229	0.00293807	4.03552e-06	0.00115982	0.0381449
k__Bacteria;p__Proteobacteria;c__Alphaproteobacteria;o__Sphingomonadales;f__Sphingomonadaceae;g__Sandaracinobacter;	0.00236	1.77429e-06	0.000769045	0.000615192	1.87656e-07	0.000250104	0.0453578
k__Bacteria;p__Firmicutes;c__Clostridia;o__Clostridia_UCG-014;f__Clostridia_UCG-014;g__Clostridia_UCG-014;	0.000185618	6.66582e-09	4.71375e-05	0.00273124	1.87402e-07	0.000249935	0.000965096
k__Bacteria;p__Proteobacteria;c__Gammaproteobacteria;o__Burkholderiales;f__Comamonadaceae;g__Hydrogenophaga;	0.0025032	2.09349e-06	0.000835362	0.000365933	1.49854e-07	0.000223498	0.035096
k__Bacteria;p__Proteobacteria;c__Gammaproteobacteria;o__Enterobacterales;f__Morganellaceae;g__Providencia;	7.95507e-05	7.84711e-09	5.11439e-05	0.00237061	1.73143e-07	0.000240238	0.00135079
k__Bacteria;p__Proteobacteria;c__Alphaproteobacteria;o__Rhizobiales;f__Beijerinckiaceae;g__Bosea;	0.000588675	1.32895e-07	0.000210471	0.00160162	3.19538e-07	0.000326363	0.0297731
k__Bacteria;p__Actinobacteriota;c__Actinobacteria;o__Corynebacteriales;f__Nocardiaceae;g__Gordonia;	0.00170769	1.46117e-06	0.000697893	0.000143191	1.69599e-08	7.51884e-05	0.0415462
k__Bacteria;p__Bacteroidota;c__Bacteroidia;o__Bacteroidales;f__Dysgonomonadaceae;g__Dysgonomonas;	0.0017183	5.01456e-07	0.000408842	0	0	0	0.0100401
k__Bacteria;p__Proteobacteria;c__Alphaproteobacteria;o__Sphingomonadales;f__Sphingomonadaceae;g__Sphingomonas;	0.000217439	5.37485e-08	0.000133851	0.00135236	1.40742e-07	0.000216596	0.00816928
k__Bacteria;p__Bacteroidota;c__Bacteroidia;o__Chitinophagales;f__Chitinophagaceae;g__Ferruginibacter;	0.00127281	8.81914e-07	0.000542191	6.89439e-05	1.12222e-08	6.11616e-05	0.0430279
k__Bacteria;p__Desulfobacterota;c__Desulfuromonadia;o__Geobacterales;f__Geobacteraceae;g__Geobacter;	0.00114023	3.47888e-07	0.000340533	0.000196225	1.78037e-08	7.7036e-05	0.0253909
k__Bacteria;p__Proteobacteria;c__Alphaproteobacteria;o__Rhizobiales;f__Devosiaceae;g__Devosia;	0.000121978	2.43851e-08	9.01575e-05	0.000928091	3.95731e-08	0.000114852	0.00373298
k__Bacteria;p__Proteobacteria;c__Gammaproteobacteria;o__Burkholderiales;f__Methylophilaceae;g__Methylophilus;	0.000912181	2.22841e-07	0.000272544	0.000111371	2.27819e-09	2.75572e-05	0.0220401
k__Bacteria;p__Chloroflexi;c__Anaerolineae;o__RBG-13-54-9;f__RBG-13-54-9;g__RBG-13-54-9;	0.000890968	2.20985e-07	0.000271407	9.54608e-05	7.08771e-09	4.86063e-05	0.0227435
k__Bacteria;p__Bacteroidota;c__Bacteroidia;o__Flavobacteriales;f__Weeksellaceae;g__Chryseobacterium;	0.000917485	3.246e-07	0.000328938	4.2427e-05	2.36257e-09	2.80628e-05	0.0277173
k__Bacteria;p__Proteobacteria;c__Gammaproteobacteria;o__Enterobacterales;f__Erwiniaceae;g__Pantoea;	4.2427e-05	2.36257e-09	2.80628e-05	0.000832631	3.85352e-07	0.0003584	0.0435532
k__Bacteria;p__Proteobacteria;c__Gammaproteobacteria;o__Pseudomonadales;f__Moraxellaceae;g__Alkanindiges;	0.000832631	1.25638e-07	0.000204645	0	0	0	0.0106213
k__Bacteria;p__Proteobacteria;c__Alphaproteobacteria;o__Rhizobiales;f__Xanthobacteraceae;g__Ancylobacter;	5.30338e-06	8.43775e-11	5.30338e-06	0.000822024	4.66608e-08	0.000124714	0.00301745
k__Bacteria;p__Bacteroidota;c__Bacteroidia;o__Cytophagales;f__Spirosomaceae;g__Emticicia;	0.000668226	2.96165e-08	9.93588e-05	0.000137888	1.62849e-08	7.36769e-05	0.00872775
k__Bacteria;p__Proteobacteria;c__Gammaproteobacteria;o__Burkholderiales;f__Chromobacteriaceae;g__Vogesella;	0.000779597	1.44286e-08	6.93507e-05	1.06068e-05	3.3751e-10	1.06068e-05	0.000771379
k__Bacteria;p__Proteobacteria;c__Gammaproteobacteria;o__Enterobacterales;f__Yersiniaceae;g__Rahnella1;	0.000620495	6.78395e-08	0.000150377	0.000106068	8.69088e-09	5.38234e-05	0.0186265
k__Bacteria;p__Proteobacteria;c__Gammaproteobacteria;o__Burkholderiales;f__Burkholderiaceae;g__Polynucleobacter;	0.000678833	2.21322e-07	0.000271614	3.71237e-05	5.90643e-10	1.40314e-05	0.0379511
k__Bacteria;p__Bacteroidota;c__Bacteroidia;o__Cytophagales;f__Spirosomaceae;g__Runella;	0.000641709	7.75429e-08	0.000160772	7.42473e-05	1.60317e-09	2.31169e-05	0.0161204
k__Bacteria;p__Chloroflexi;c__Anaerolineae;o__SBR1031;f__A4b;g__A4b;	0.000631102	9.27309e-08	0.000175813	3.71237e-05	2.6157e-09	2.9528e-05	0.0177225
k__Bacteria;p__Proteobacteria;c__Gammaproteobacteria;o__Burkholderiales;f__Oxalobacteraceae;g__Undibacterium;	0.000562158	7.90617e-08	0.000162339	3.71237e-05	1.09691e-09	1.91216e-05	0.0188202
k__Bacteria;p__Bacteroidota;c__Bacteroidia;o__Flavobacteriales;f__Crocinitomicaceae;g__Fluviicola;	0.000578068	1.51205e-07	0.000224503	1.59101e-05	7.59398e-10	1.59101e-05	0.034164
k__Bacteria;p__Firmicutes;c__Bacilli;o__Staphylococcales;f__Staphylococcaceae;g__Staphylococcus;	7.95507e-05	6.32831e-09	4.59286e-05	0.000450787	2.16006e-08	8.48541e-05	0.013281
k__Bacteria;p__Proteobacteria;c__Alphaproteobacteria;o__Caulobacterales;f__Caulobacteraceae;g__Asticcacaulis;	6.36406e-05	4.05012e-09	3.67429e-05	0.000334113	2.53133e-10	9.18572e-06	0.00228796
k__Bacteria;p__Proteobacteria;c__Alphaproteobacteria;o__Caulobacterales;f__Caulobacteraceae;g__Caulobacter;	5.83372e-05	5.65329e-09	4.341e-05	0.000281079	2.46382e-08	9.06242e-05	0.0424625
k__Bacteria;p__Bacteroidota;c__Bacteroidia;o__Chitinophagales;f__Chitinophagaceae;g__Edaphobaculum;	0.000291686	3.70417e-08	0.000111118	4.77304e-05	7.59398e-10	1.59101e-05	0.0447993
k__Bacteria;p__Bacteroidota;c__Bacteroidia;o__Cytophagales;f__Spirosomaceae;g__Arcicella;	0.000302293	4.42982e-08	0.000121516	5.30338e-06	8.43775e-11	5.30338e-06	0.0359651
k__Bacteria;p__Proteobacteria;c__Gammaproteobacteria;o__Burkholderiales;f__Comamonadaceae;g__Acidovorax;	0.000243955	7.67835e-09	5.0591e-05	3.18203e-05	0	0	0.0102339
k__Bacteria;p__Proteobacteria;c__Gammaproteobacteria;o__Burkholderiales;f__Comamonadaceae;g__Piscinibacter;	0.000238652	1.44286e-08	6.93507e-05	2.12135e-05	3.3751e-10	1.06068e-05	0.0199127
k__Bacteria;p__Myxococcota;c__Polyangia;o__mle1-27;f__mle1-27;g__mle1-27;	0.000169708	7.67835e-09	5.0591e-05	0	0	0	0.0175288
k__Bacteria;p__Patescibacteria;c__Saccharimonadia;o__Saccharimonadales;f__Saccharimonadaceae;g__Candidatus_Saccharimonas;	1.06068e-05	3.3751e-10	1.06068e-05	0.000143191	7.84711e-09	5.11439e-05	0.0318255
k__Bacteria;p__Proteobacteria;c__Alphaproteobacteria;o__Rhizobiales;f__Rhizobiaceae;g__Ochrobactrum;	3.18203e-05	7.59398e-10	1.59101e-05	0.000116674	1.60317e-09	2.31169e-05	0.0210227
k__Bacteria;p__Proteobacteria;c__Alphaproteobacteria;o__SAR11_clade;f__Clade_I;g__Clade_Ia;	0	0	0	0.000137888	1.35004e-09	2.12135e-05	0.00321117
k__Bacteria;p__Bacteroidota;c__Bacteroidia;o__Sphingobacteriales;f__Lentimicrobiaceae;g__Lentimicrobium;	0.000121978	1.09691e-09	1.91216e-05	1.59101e-05	7.59398e-10	1.59101e-05	0.00892147
k__Bacteria;p__Firmicutes;c__Clostridia;o__Lachnospirales;f__Lachnospiraceae;g__Lachnospira;	0	0	0	0.000121978	2.10944e-09	2.65169e-05	0.00781152
k__Bacteria;p__Proteobacteria;c__Gammaproteobacteria;o__Oceanospirillales;f__Alcanivoracaceae;g__Ketobacter;	0.000111371	5.31578e-09	4.20943e-05	5.30338e-06	8.43775e-11	5.30338e-06	0.0327225
k__Bacteria;p__Proteobacteria;c__Gammaproteobacteria;o__Burkholderiales;f__Chitinimonadaceae;g__Chitinimonas;	0.000100764	2.36257e-09	2.80628e-05	0	0	0	0.0143595
k__Bacteria;p__Firmicutes;c__Bacilli;o__Erysipelotrichales;f__Erysipelotrichaceae;g__ZOR0006;	9.54608e-05	7.59398e-10	1.59101e-05	5.30338e-06	8.43775e-11	5.30338e-06	0.00427923
k__Bacteria;p__Proteobacteria;c__Alphaproteobacteria;o__Sphingomonadales;f__Sphingomonadaceae;g__Erythrobacter;	5.30338e-06	8.43775e-11	5.30338e-06	9.54608e-05	3.29072e-09	3.31196e-05	0.0255846
k__Bacteria;p__Actinobacteriota;c__Actinobacteria;o__Micrococcales;f__Micrococcaceae;g__Rothia;	1.59101e-05	2.53133e-10	9.18572e-06	7.95507e-05	1.01253e-09	1.83714e-05	0.0201065
k__Bacteria;p__Proteobacteria;c__Gammaproteobacteria;o__Burkholderiales;f__Comamonadaceae;g__Pseudorhodoferax;	1.06068e-05	8.43775e-11	5.30338e-06	7.95507e-05	1.01253e-09	1.83714e-05	0.0140017
k__Bacteria;p__Bacteroidota;c__Bacteroidia;o__Chitinophagales;f__Chitinophagaceae;g__Dinghuibacter;	6.36406e-05	2.53133e-10	9.18572e-06	1.59101e-05	2.53133e-10	9.18572e-06	0.013808
k__Bacteria;p__Proteobacteria;c__Alphaproteobacteria;o__Rhizobiales;f__Rhizobiaceae;g__Chelativorans;	5.30338e-06	8.43775e-11	5.30338e-06	6.89439e-05	1.09691e-09	1.91216e-05	0.019014
k__Bacteria;p__Bacteroidota;c__Bacteroidia;o__Sphingobacteriales;f__Sphingobacteriaceae;g__Nubsella;	0	0	0	5.83372e-05	3.3751e-10	1.06068e-05	0.0039267
k__Bacteria;p__Proteobacteria;c__Alphaproteobacteria;o__Paracaedibacterales;f__Paracaedibacteraceae;g__Candidatus_Finniella;	5.83372e-05	5.90643e-10	1.40314e-05	0	0	0	0.0104276
k__Bacteria;p__Proteobacteria;c__Alphaproteobacteria;o__Rhodospirillales;f__Rhodospirillaceae;g__Novispirillum;	5.30338e-05	1.09691e-09	1.91216e-05	0	0	0	0.0247103
k__Bacteria;p__Bacteroidota;c__Bacteroidia;o__Bacteroidales;f__Dysgonomonadaceae;g__Petrimonas;	4.77304e-05	2.53133e-10	9.18572e-06	0	0	0	0.00447295
k__Bacteria;p__Patescibacteria;c__Gracilibacteria;o__JGI_0000069-P22;f__JGI_0000069-P22;g__JGI_0000069-P22;	4.77304e-05	2.53133e-10	9.18572e-06	0	0	0	0.00447295
k__Bacteria;p__Proteobacteria;c__Gammaproteobacteria;o__Burkholderiales;f__Comamonadaceae;g__Mitsuaria;	4.77304e-05	1.01253e-09	1.83714e-05	0	0	0	0.0301606
k__Bacteria;p__Actinobacteriota;c__Coriobacteriia;o__OPB41;f__OPB41;g__OPB41;	4.77304e-05	1.01253e-09	1.83714e-05	0	0	0	0.0301606
k__Bacteria;p__Proteobacteria;c__Gammaproteobacteria;o__Pasteurellales;f__Pasteurellaceae;g__Aggregatibacter;	0	0	0	4.77304e-05	2.53133e-10	9.18572e-06	0.00447295
k__Bacteria;p__Desulfobacterota;c__Desulfobulbia;o__Desulfobulbales;f__Desulfobulbaceae;g__Desulfobulbus;	4.2427e-05	5.90643e-10	1.40314e-05	5.30338e-06	8.43775e-11	5.30338e-06	0.0343578
k__Bacteria;p__Proteobacteria;c__Gammaproteobacteria;o__Burkholderiales;f__Comamonadaceae;g__Rubrivivax;	3.71237e-05	8.43775e-11	5.30338e-06	5.30338e-06	8.43775e-11	5.30338e-06	0.00911518
k__Bacteria;p__Bacteroidota;c__Bacteroidia;o__Chitinophagales;f__Chitinophagaceae;g__Parasegetibacter;	5.30338e-06	8.43775e-11	5.30338e-06	3.71237e-05	5.90643e-10	1.40314e-05	0.0463089
k__Bacteria;p__Firmicutes;c__Clostridia;o__Oscillospirales;f__Ruminococcaceae;g__Ruminococcaceae;	0	0	0	3.71237e-05	3.3751e-10	1.06068e-05	0.0152059
k__Bacteria;p__Cyanobacteria;c__Cyanobacteriia;o__Cyanobacteriales;f__Microcystaceae;g__Microcystis_PCC-7914;	3.18203e-05	2.53133e-10	9.18572e-06	5.30338e-06	8.43775e-11	5.30338e-06	0.0327225
k__Bacteria;p__Actinobacteriota;c__Actinobacteria;o__Pseudonocardiales;f__Pseudonocardiaceae;g__Amycolatopsis;	5.30338e-06	8.43775e-11	5.30338e-06	3.18203e-05	2.53133e-10	9.18572e-06	0.0327225
k__Bacteria;p__Actinobacteriota;c__Actinobacteria;o__Propionibacteriales;f__Nocardioidaceae;g__Aeromicrobium;	2.65169e-05	3.3751e-10	1.06068e-05	0	0	0	0.0327225
k__Bacteria;p__Proteobacteria;c__Alphaproteobacteria;o__Rhizobiales;f__Xanthobacteraceae;g__Rhodoplanes;	1.59101e-05	0	0	0	0	0	0

## Sheet: AlbL-vs-AlbF.psig
Table S6. Results of tests for significant differences in abundance of bacterial genera between larval and adult mosquitoes.
Statistical metrics were obtained from Metastats analysis in the genus with a p-value less than 0.05.
Taxa	mean(AlbL)	variance(AlbL)	standard error(AlbL)	mean(AlbF)	variance(AlbF)	standard error(AlbF)	p value
k__Bacteria;p__Proteobacteria;c__Alphaproteobacteria;o__Rickettsiales;f__Anaplasmataceae;g__Wolbachia;	0.0214044	6.72807e-05	0.0047357	0.539815	0.184214	0.247799	0.0412924
k__Bacteria;p__Proteobacteria;c__Gammaproteobacteria;o__Enterobacterales;f__Yersiniaceae;g__Serratia;	0.391114	0.0456758	0.123391	0.0264957	0.000546278	0.0134942	0.0202054
k__Bacteria;p__Proteobacteria;c__Gammaproteobacteria;o__Burkholderiales;f__Comamonadaceae;g__Hydrogenophaga;	0.0143934	0.00012324	0.00640937	0.00101825	1.04367e-06	0.000589821	0.0421562
k__Bacteria;p__Proteobacteria;c__Gammaproteobacteria;o__Enterobacterales;f__Enterobacteriaceae;g__Escherichia-Shigella;	6.36406e-05	2.27819e-09	2.75572e-05	0.0108189	2.8526e-05	0.00308361	0.0132433
k__Bacteria;p__Proteobacteria;c__Gammaproteobacteria;o__Burkholderiales;f__Comamonadaceae;g__Aquabacterium;	0.00651255	8.72303e-06	0.00170519	0.00042427	1.23866e-07	0.000203196	0.0124375
k__Bacteria;p__Firmicutes;c__Clostridia;o__Lachnospirales;f__Lachnospiraceae;g__Blautia;	5.30338e-05	2.36257e-09	2.80628e-05	0.00413133	2.37042e-06	0.000888898	0.0058125
k__Bacteria;p__Proteobacteria;c__Gammaproteobacteria;o__Burkholderiales;f__Sutterellaceae;g__Parasutterella;	1.06068e-05	3.3751e-10	1.06068e-05	0.00348432	4.04708e-06	0.00116148	0.0192969
k__Bacteria;p__Firmicutes;c__Clostridia;o__Peptostreptococcales-Tissierellales;f__Peptostreptococcaceae;g__Clostridioides;	5.30338e-06	8.43775e-11	5.30338e-06	0.00303353	2.46205e-06	0.000905916	0.0153906
k__Bacteria;p__Proteobacteria;c__Alphaproteobacteria;o__Acetobacterales;f__Acetobacteraceae;g__Roseomonas;	0.00179254	7.48344e-07	0.000499448	0.000572765	2.25035e-07	0.000273882	0.0376607
k__Bacteria;p__Firmicutes;c__Bacilli;o__Erysipelotrichales;f__Erysipelotrichaceae;g__Clostridium_innocuum_group;	0	0	0	0.0023547	9.38869e-07	0.000559425	0.00707143
k__Bacteria;p__Proteobacteria;c__Gammaproteobacteria;o__Enterobacterales;f__Thorselliaceae;g__Coetzeea;	0.001888	3.67127e-07	0.000349822	0	0	0	0.0036942
k__Bacteria;p__Proteobacteria;c__Gammaproteobacteria;o__Burkholderiales;f__Chromobacteriaceae;g__Vogesella;	0.00181906	1.79277e-06	0.000773039	6.36406e-05	4.05012e-09	3.67429e-05	0.032846
k__Bacteria;p__Actinobacteriota;c__Actinobacteria;o__PeM15;f__PeM15;g__PeM15;	0.00112962	3.33376e-07	0.000333354	0.000249259	9.52622e-08	0.000178197	0.0314107
k__Bacteria;p__Proteobacteria;c__Gammaproteobacteria;o__Enterobacterales;f__Enterobacteriaceae;g__Klebsiella;	2.12135e-05	5.90643e-10	1.40314e-05	0.00130463	4.26275e-07	0.000376951	0.014779
k__Bacteria;p__Proteobacteria;c__Gammaproteobacteria;o__Enterobacterales;f__Morganellaceae;g__Morganella;	5.30338e-06	8.43775e-11	5.30338e-06	0.0010925	3.58773e-07	0.000345819	0.0168036
k__Bacteria;p__Firmicutes;c__Bacilli;o__Erysipelotrichales;f__Erysipelatoclostridiaceae;g__Coprobacillus;	0	0	0	0.00106068	1.15766e-07	0.00019644	0.0034933
k__Bacteria;p__Firmicutes;c__Bacilli;o__Lactobacillales;f__Enterococcaceae;g__Enterococcus;	0	0	0	0.000959912	1.42345e-07	0.000217826	0.00601339
k__Bacteria;p__Proteobacteria;c__Alphaproteobacteria;o__Sphingomonadales;f__Sphingomonadaceae;g__Sphingomonas;	0.000159101	4.80952e-09	4.00396e-05	0.00073717	9.55153e-08	0.000178433	0.0166027
k__Bacteria;p__Proteobacteria;c__Alphaproteobacteria;o__Caulobacterales;f__Hyphomonadaceae;g__UKL13-1;	0.000822024	2.46382e-08	9.06242e-05	0	0	0	0.000819196
k__Bacteria;p__Proteobacteria;c__Gammaproteobacteria;o__Burkholderiales;f__Rhodocyclaceae;g__Dechloromonas;	0.00073717	2.80808e-07	0.000305946	5.83372e-05	5.65329e-09	4.341e-05	0.0360112
k__Bacteria;p__Actinobacteriota;c__Actinobacteria;o__Bifidobacteriales;f__Bifidobacteriaceae;g__Bifidobacterium;	3.18203e-05	2.53133e-10	9.18572e-06	0.000742473	2.64102e-08	9.38264e-05	0.00142187
k__Bacteria;p__Firmicutes;c__Bacilli;o__Bacillales;f__Bacillaceae;g__Bacillus;	0.000530338	1.15766e-07	0.00019644	0.000116674	3.62823e-09	3.47766e-05	0.0423571
k__Bacteria;p__Firmicutes;c__Bacilli;o__Erysipelotrichales;f__Erysipelotrichaceae;g__Dubosiella;	0	0	0	0.000540945	6.55613e-08	0.00014783	0.0118259
k__Bacteria;p__Proteobacteria;c__Alphaproteobacteria;o__Rhizobiales;f__Xanthobacteraceae;g__Ancylobacter;	2.12135e-05	1.35004e-09	2.12135e-05	0.000509124	7.69523e-08	0.000160159	0.0186875
k__Bacteria;p__Bacteroidota;c__Bacteroidia;o__Bacteroidales;f__Bacteroidaceae;g__Bacteroides;	1.06068e-05	8.43775e-11	5.30338e-06	0.000503821	1.35004e-07	0.000212135	0.0316116
k__Bacteria;p__Firmicutes;c__Clostridia;o__Oscillospirales;f__Ruminococcaceae;g__Subdoligranulum;	0	0	0	0.000487911	5.72923e-08	0.000138194	0.0128393
k__Bacteria;p__Firmicutes;c__Clostridia;o__Lachnospirales;f__Lachnospiraceae;g__Ruminococcus_torques_group;	0	0	0	0.000466697	8.96933e-08	0.00017291	0.0228237
k__Bacteria;p__Proteobacteria;c__Gammaproteobacteria;o__Enterobacterales;f__Enterobacteriaceae;g__Kosakonia;	5.30338e-06	8.43775e-11	5.30338e-06	0.000456091	6.69114e-08	0.000149345	0.0188884
k__Bacteria;p__Proteobacteria;c__Gammaproteobacteria;o__Enterobacterales;f__Enterobacteriaceae;g__Citrobacter;	4.77304e-05	7.59398e-10	1.59101e-05	0.000403057	5.37485e-08	0.000133851	0.0264353
k__Bacteria;p__Proteobacteria;c__Gammaproteobacteria;o__Xanthomonadales;f__Xanthomonadaceae;g__Pseudoxanthomonas;	0.000127281	4.80952e-09	4.00396e-05	0.000312899	1.37535e-08	6.7709e-05	0.0307567
k__Bacteria;p__Proteobacteria;c__Alphaproteobacteria;o__Sphingomonadales;f__Sphingomonadaceae;g__Sphingopyxis;	0.000100764	3.12197e-09	3.22592e-05	0.000291686	2.53976e-08	9.20102e-05	0.0495067
k__Bacteria;p__Firmicutes;c__Clostridia;o__Lachnospirales;f__Lachnospiraceae;g__Fusicatenibacter;	0	0	0	0.000302293	2.53133e-08	9.18572e-05	0.0157924
k__Bacteria;p__Firmicutes;c__Clostridia;o__Lachnospirales;f__Lachnospiraceae;g__Eubacterium_hallii_group;	5.30338e-06	8.43775e-11	5.30338e-06	0.000291686	1.12222e-08	6.11616e-05	0.00537277
k__Bacteria;p__Proteobacteria;c__Gammaproteobacteria;o__Burkholderiales;f__Burkholderiaceae;g__Lautropia;	0.000259866	3.65355e-08	0.000110356	2.12135e-05	3.3751e-10	1.06068e-05	0.0374598
k__Bacteria;p__Proteobacteria;c__Gammaproteobacteria;o__Burkholderiales;f__Comamonadaceae;g__Curvibacter;	0.000238652	1.77193e-09	2.43031e-05	2.65169e-05	2.10944e-09	2.65169e-05	0.00309152
k__Bacteria;p__Proteobacteria;c__Alphaproteobacteria;o__Rhizobiales;f__Pleomorphomonadaceae;g__Chthonobacter;	0.000222742	1.92381e-08	8.00793e-05	3.18203e-05	3.03759e-09	3.18203e-05	0.0340937
k__Bacteria;p__Cyanobacteria;c__Cyanobacteriia;o__Cyanobacteriales;f__Chroococcidiopsaceae;g__Chroococcidiopsis_PCC_7203;	0.000185618	4.1345e-09	3.71237e-05	5.30338e-05	5.90643e-10	1.40314e-05	0.0155915
k__Bacteria;p__Proteobacteria;c__Alphaproteobacteria;o__Caulobacterales;f__Caulobacteraceae;g__Caulobacter;	1.59101e-05	2.53133e-10	9.18572e-06	0.000217439	1.12222e-08	6.11616e-05	0.0159933
k__Bacteria;p__Firmicutes;c__Clostridia;o__Lachnospirales;f__Lachnospiraceae;g__Dorea;	5.30338e-06	8.43775e-11	5.30338e-06	0.000212135	7.67835e-09	5.0591e-05	0.00747321
k__Bacteria;p__Firmicutes;c__Clostridia;o__Clostridia_UCG-014;f__Clostridia_UCG-014;g__Clostridia_UCG-014;	0	0	0	0.000217439	8.69088e-09	5.38234e-05	0.00807589
k__Bacteria;p__Verrucomicrobiota;c__Verrucomicrobiae;o__Verrucomicrobiales;f__Akkermansiaceae;g__Akkermansia;	0	0	0	0.000212135	8.18462e-09	5.22322e-05	0.00767411
k__Bacteria;p__Proteobacteria;c__Alphaproteobacteria;o__Caulobacterales;f__Caulobacteraceae;g__Asticcacaulis;	1.06068e-05	8.43775e-11	5.30338e-06	0.000190922	9.11277e-09	5.51143e-05	0.0161942
k__Bacteria;p__Firmicutes;c__Clostridia;o__Lachnospirales;f__Lachnospiraceae;g__Anaerostipes;	0	0	0	0.000201528	2.6157e-09	2.9528e-05	0.00224107
k__Bacteria;p__Bacteroidota;c__Bacteroidia;o__Chitinophagales;f__Chitinophagaceae;g__Sediminibacterium;	0.000180315	2.36257e-09	2.80628e-05	1.06068e-05	8.43775e-11	5.30338e-06	0.00289062
k__Bacteria;p__Bdellovibrionota;c__Bdellovibrionia;o__Bdellovibrionales;f__Bdellovibrionaceae;g__Bdellovibrio;	0.000137888	4.38763e-09	3.82432e-05	4.2427e-05	8.43775e-11	5.30338e-06	0.0298304
k__Bacteria;p__Proteobacteria;c__Gammaproteobacteria;o__Burkholderiales;f__Burkholderiaceae;g__Polynucleobacter;	0.000148495	4.1345e-09	3.71237e-05	5.30338e-06	8.43775e-11	5.30338e-06	0.0114174
k__Bacteria;p__Actinobacteriota;c__Actinobacteria;o__Corynebacteriales;f__Corynebacteriaceae;g__Corynebacterium;	1.06068e-05	3.3751e-10	1.06068e-05	0.000137888	2.6157e-09	2.9528e-05	0.007875
k__Bacteria;p__Proteobacteria;c__Gammaproteobacteria;o__Burkholderiales;f__Chromobacteriaceae;g__Aquitalea;	0.000143191	1.01253e-09	1.83714e-05	0	0	0	0.00122098
k__Bacteria;p__Firmicutes;c__Bacilli;o__Paenibacillales;f__Paenibacillaceae;g__Paenibacillus;	0.000121978	8.18462e-09	5.22322e-05	1.06068e-05	3.3751e-10	1.06068e-05	0.0414933
k__Bacteria;p__Firmicutes;c__Bacilli;o__Erysipelotrichales;f__Erysipelatoclostridiaceae;g__Erysipelatoclostridium;	0	0	0	0.000132584	1.35004e-09	2.12135e-05	0.00268973
k__Bacteria;p__Firmicutes;c__Clostridia;o__Monoglobales;f__Monoglobaceae;g__Monoglobus;	0	0	0	0.000132584	8.18462e-09	5.22322e-05	0.0268393
k__Bacteria;p__Proteobacteria;c__Alphaproteobacteria;o__Sphingomonadales;f__Sphingomonadaceae;g__Sphingobium;	2.65169e-05	5.90643e-10	1.40314e-05	0.000106068	2.10944e-09	2.65169e-05	0.0248638
k__Bacteria;p__Proteobacteria;c__Alphaproteobacteria;o__Reyranellales;f__Reyranellaceae;g__Reyranella;	9.01575e-05	2.36257e-09	2.80628e-05	2.65169e-05	3.3751e-10	1.06068e-05	0.0382701
k__Bacteria;p__Proteobacteria;c__Gammaproteobacteria;o__Pasteurellales;f__Pasteurellaceae;g__Haemophilus;	0	0	0	0.000116674	8.69088e-09	5.38234e-05	0.0370558
k__Bacteria;p__Proteobacteria;c__Gammaproteobacteria;o__Burkholderiales;f__Comamonadaceae;g__Piscinibacter;	0.000116674	6.66582e-09	4.71375e-05	0	0	0	0.0296295
k__Bacteria;p__Firmicutes;c__Bacilli;o__Staphylococcales;f__Staphylococcaceae;g__Staphylococcus;	2.12135e-05	8.43775e-11	5.30338e-06	8.48541e-05	2.6157e-09	2.9528e-05	0.0382701
k__Bacteria;p__Actinobacteriota;c__Actinobacteria;o__Frankiales;f__Sporichthyaceae;g__Longivirga;	7.42473e-05	3.3751e-10	1.06068e-05	2.65169e-05	5.90643e-10	1.40314e-05	0.0219531
k__Bacteria;p__Proteobacteria;c__Alphaproteobacteria;o__Sphingomonadales;f__Sphingomonadaceae;g__Altererythrobacter;	1.06068e-05	8.43775e-11	5.30338e-06	7.95507e-05	7.59398e-10	1.59101e-05	0.00727232
k__Bacteria;p__Proteobacteria;c__Gammaproteobacteria;o__Enterobacterales;f__Yersiniaceae;g__Rahnella1;	7.42473e-05	5.90643e-10	1.40314e-05	1.06068e-05	8.43775e-11	5.30338e-06	0.00642187
k__Bacteria;p__Firmicutes;c__Negativicutes;o__Veillonellales-Selenomonadales;f__Veillonellaceae;g__Veillonella;	0	0	0	8.48541e-05	3.3751e-10	1.06068e-05	0.00102009
k__Bacteria;p__Proteobacteria;c__Gammaproteobacteria;o__Xanthomonadales;f__Xanthomonadaceae;g__Lysobacter;	7.95507e-05	4.80952e-09	4.00396e-05	0	0	0	0.0469085
k__Bacteria;p__Proteobacteria;c__Gammaproteobacteria;o__Burkholderiales;f__Alcaligenaceae;g__Bordetella;	7.42473e-05	3.3751e-10	1.06068e-05	0	0	0	0.00162277
k__Bacteria;p__Proteobacteria;c__Gammaproteobacteria;o__Xanthomonadales;f__Xanthomonadaceae;g__Vulcaniibacterium;	0	0	0	7.42473e-05	3.62823e-09	3.47766e-05	0.0378616
k__Bacteria;p__Bacteroidota;c__Bacteroidia;o__Chitinophagales;f__37-13;g__37-13;	6.36406e-05	1.01253e-09	1.83714e-05	0	0	0	0.0134442
k__Bacteria;p__Proteobacteria;c__Alphaproteobacteria;o__Caulobacterales;f__Caulobacteraceae;g__Phenylobacterium;	1.06068e-05	8.43775e-11	5.30338e-06	4.77304e-05	7.59398e-10	1.59101e-05	0.0345112
k__Bacteria;p__Bacteroidota;c__Bacteroidia;o__Sphingobacteriales;f__Sphingobacteriaceae;g__Pedobacter;	1.06068e-05	8.43775e-11	5.30338e-06	4.77304e-05	7.59398e-10	1.59101e-05	0.0345112
k__Bacteria;p__Firmicutes;c__Bacilli;o__Erysipelotrichales;f__Erysipelatoclostridiaceae;g__Erysipelotrichaceae_UCG-003;	0	0	0	5.83372e-05	3.3751e-10	1.06068e-05	0.00329241
k__Bacteria;p__Proteobacteria;c__Gammaproteobacteria;o__Enterobacterales;f__Morganellaceae;g__Providencia;	0	0	0	5.83372e-05	1.09691e-09	1.91216e-05	0.017817
k__Bacteria;p__Chloroflexi;c__Anaerolineae;o__SJA-15;f__SJA-15;g__SJA-15;	3.71237e-05	8.43775e-11	5.30338e-06	1.06068e-05	8.43775e-11	5.30338e-06	0.0126384
k__Bacteria;p__Firmicutes;c__Clostridia;o__Oscillospirales;f__Butyricicoccaceae;g__Butyricicoccus;	0	0	0	4.77304e-05	2.53133e-10	9.18572e-06	0.00389509
k__Bacteria;p__Proteobacteria;c__Alphaproteobacteria;o__Rhizobiales;f__Xanthobacteraceae;g__Rhodopseudomonas;	5.30338e-06	8.43775e-11	5.30338e-06	4.2427e-05	3.3751e-10	1.06068e-05	0.0172121
k__Bacteria;p__Bacteroidota;c__Bacteroidia;o__Cytophagales;f__Spirosomaceae;g__Lacihabitans;	4.2427e-05	3.3751e-10	1.06068e-05	5.30338e-06	8.43775e-11	5.30338e-06	0.0172121
k__Bacteria;p__Proteobacteria;c__Gammaproteobacteria;o__Burkholderiales;f__Comamonadaceae;g__Schlegelella;	0	0	0	4.2427e-05	3.3751e-10	1.06068e-05	0.00877902
k__Bacteria;p__Proteobacteria;c__Gammaproteobacteria;o__Enterobacterales;f__Morganellaceae;g__Proteus;	0	0	0	3.71237e-05	8.43775e-11	5.30338e-06	0.00162277
k__Bacteria;p__Firmicutes;c__Clostridia;o__Clostridiales;f__Clostridiaceae;g__Clostridium_sensu_stricto_8;	5.30338e-06	8.43775e-11	5.30338e-06	3.18203e-05	2.53133e-10	9.18572e-06	0.0272857
k__Bacteria;p__Actinobacteriota;c__Actinobacteria;o__Corynebacteriales;f__Nocardiaceae;g__Rhodococcus;	3.18203e-05	2.53133e-10	9.18572e-06	5.30338e-06	8.43775e-11	5.30338e-06	0.0272857
k__Bacteria;p__Actinobacteriota;c__Coriobacteriia;o__Coriobacteriales;f__Coriobacteriaceae;g__Collinsella;	0	0	0	3.18203e-05	2.53133e-10	9.18572e-06	0.0134442
k__Bacteria;p__Firmicutes;c__Clostridia;o__Lachnospirales;f__Lachnospiraceae;g__Lachnospira;	0	0	0	3.18203e-05	0	0	0
k__Bacteria;p__Firmicutes;c__Clostridia;o__Clostridiales;f__Clostridiaceae;g__Clostridium_sensu_stricto_3;	2.12135e-05	8.43775e-11	5.30338e-06	5.30338e-06	8.43775e-11	5.30338e-06	0.0382701
k__Bacteria;p__Actinobacteriota;c__Actinobacteria;o__Frankiales;f__Frankiales;g__Frankiales;	2.65169e-05	8.43775e-11	5.30338e-06	0	0	0	0.00409598
k__Bacteria;p__Proteobacteria;c__Gammaproteobacteria;o__Xanthomonadales;f__Xanthomonadaceae;g__Thermomonas;	2.65169e-05	8.43775e-11	5.30338e-06	0	0	0	0.00409598
k__Bacteria;p__Planctomycetota;c__Planctomycetes;o__Planctomycetales;f__Rubinisphaeraceae;g__SH-PL14;	2.12135e-05	3.3751e-10	1.06068e-05	0	0	0	0.0455692
k__Bacteria;p__Proteobacteria;c__Gammaproteobacteria;o__Burkholderiales;f__Leeiaceae;g__Leeia;	2.12135e-05	8.43775e-11	5.30338e-06	0	0	0	0.00877902
k__Bacteria;p__Proteobacteria;c__Gammaproteobacteria;o__Burkholderiales;f__Nitrosomonadaceae;g__Ellin6067;	0	0	0	2.12135e-05	8.43775e-11	5.30338e-06	0.00877902
k__Bacteria;p__Cyanobacteria;c__Cyanobacteriia;o__Leptolyngbyales;f__Leptolyngbyaceae;g__JSC-12;	2.12135e-05	8.43775e-11	5.30338e-06	0	0	0	0.00877902
k__Bacteria;p__Proteobacteria;c__Gammaproteobacteria;o__Burkholderiales;f__Rhodocyclaceae;g__Thauera;	0	0	0	2.12135e-05	8.43775e-11	5.30338e-06	0.00877902
k__Bacteria;p__Proteobacteria;c__Gammaproteobacteria;o__Burkholderiales;f__Methylophilaceae;g__Methylotenera;	1.59101e-05	0	0	0	0	0	0
k__Bacteria;p__Actinobacteriota;c__Actinobacteria;o__Pseudonocardiales;f__Pseudonocardiaceae;g__Amycolatopsis;	0	0	0	1.59101e-05	0	0	0

## Sheet: AlbL-vs-AlbM.psig
Table S6. Results of tests for significant differences in abundance of bacterial genera between larval and adult mosquitoes.
Statistical metrics were obtained from Metastats analysis in the genus with a p-value less than 0.05.
Taxa	mean(AlbL)	variance(AlbL)	standard error(AlbL)	mean(AlbM)	variance(AlbM)	standard error(AlbM)	p value
k__Bacteria;p__Proteobacteria;c__Alphaproteobacteria;o__Rickettsiales;f__Anaplasmataceae;g__Wolbachia;	0.0214044	6.72807e-05	0.0047357	0.700094	0.00398265	0.0364356	0.000675269
k__Bacteria;p__Proteobacteria;c__Gammaproteobacteria;o__Enterobacterales;f__Yersiniaceae;g__Serratia;	0.391114	0.0456758	0.123391	0.0177027	0.000387637	0.0113672	0.0122581
k__Bacteria;p__Proteobacteria;c__Gammaproteobacteria;o__Burkholderiales;f__Comamonadaceae;g__Hydrogenophaga;	0.0143934	0.00012324	0.00640937	0.000965215	8.5466e-07	0.000533748	0.0361828
k__Bacteria;p__Proteobacteria;c__Gammaproteobacteria;o__Enterobacterales;f__Enterobacteriaceae;g__Escherichia-Shigella;	6.36406e-05	2.27819e-09	2.75572e-05	0.00692621	3.26881e-05	0.00330091	0.0366043
k__Bacteria;p__Proteobacteria;c__Gammaproteobacteria;o__Burkholderiales;f__Comamonadaceae;g__Aquabacterium;	0.00651255	8.72303e-06	0.00170519	0.000365933	5.5436e-08	0.000135936	0.0077914
k__Bacteria;p__Firmicutes;c__Bacilli;o__Bacillales;f__Planococcaceae;g__Lysinibacillus;	0.00589736	9.91225e-06	0.00181771	1.59101e-05	7.59398e-10	1.59101e-05	0.00992258
k__Bacteria;p__Proteobacteria;c__Gammaproteobacteria;o__Enterobacterales;f__Thorselliaceae;g__Coetzeea;	0.001888	3.67127e-07	0.000349822	0	0	0	0.00295914
k__Bacteria;p__Actinobacteriota;c__Actinobacteria;o__PeM15;f__PeM15;g__PeM15;	0.00112962	3.33376e-07	0.000333354	0.000111371	9.3659e-09	5.58746e-05	0.0124688
k__Bacteria;p__Proteobacteria;c__Gammaproteobacteria;o__Enterobacterales;f__Enterobacteriaceae;g__Klebsiella;	2.12135e-05	5.90643e-10	1.40314e-05	0.000928091	5.9368e-07	0.000444852	0.0378516
k__Bacteria;p__Proteobacteria;c__Gammaproteobacteria;o__Enterobacterales;f__Morganellaceae;g__Morganella;	5.30338e-06	8.43775e-11	5.30338e-06	0.000885664	5.88871e-07	0.000443047	0.0473892
k__Bacteria;p__Proteobacteria;c__Gammaproteobacteria;o__Burkholderiales;f__Rhodocyclaceae;g__Dechloromonas;	0.00073717	2.80808e-07	0.000305946	0.000111371	4.05012e-09	3.67429e-05	0.0387527
k__Bacteria;p__Proteobacteria;c__Alphaproteobacteria;o__Caulobacterales;f__Hyphomonadaceae;g__UKL13-1;	0.000822024	2.46382e-08	9.06242e-05	0	0	0	0.00162151
k__Bacteria;p__Proteobacteria;c__Gammaproteobacteria;o__Xanthomonadales;f__Xanthomonadaceae;g__Stenotrophomonas;	1.06068e-05	3.3751e-10	1.06068e-05	0.00075308	3.52445e-07	0.000342756	0.0326151
k__Bacteria;p__Firmicutes;c__Bacilli;o__Erysipelotrichales;f__Erysipelotrichaceae;g__Dubosiella;	0	0	0	0.000562158	2.38029e-07	0.000281679	0.0448581
k__Bacteria;p__Proteobacteria;c__Alphaproteobacteria;o__Caulobacterales;f__Caulobacteraceae;g__Asticcacaulis;	1.06068e-05	8.43775e-11	5.30338e-06	0.000525035	1.74155e-07	0.000240939	0.0330151
k__Bacteria;p__Proteobacteria;c__Gammaproteobacteria;o__Pseudomonadales;f__Moraxellaceae;g__Acinetobacter;	0.000132584	7.67835e-09	5.0591e-05	0.000334113	4.80952e-09	4.00396e-05	0.0109355
k__Bacteria;p__Firmicutes;c__Clostridia;o__Oscillospirales;f__Ruminococcaceae;g__Faecalibacterium;	5.30338e-06	8.43775e-11	5.30338e-06	0.00039245	5.07109e-08	0.000130014	0.0128903
k__Bacteria;p__Proteobacteria;c__Gammaproteobacteria;o__Enterobacterales;f__Enterobacteriaceae;g__Kosakonia;	5.30338e-06	8.43775e-11	5.30338e-06	0.000350023	7.59398e-10	1.59101e-05	0.000464516
k__Bacteria;p__Firmicutes;c__Clostridia;o__Lachnospirales;f__Lachnospiraceae;g__Eubacterium_hallii_group;	5.30338e-06	8.43775e-11	5.30338e-06	0.000318203	6.78395e-08	0.000150377	0.0363935
k__Bacteria;p__Proteobacteria;c__Gammaproteobacteria;o__Burkholderiales;f__Comamonadaceae;g__Curvibacter;	0.000238652	1.77193e-09	2.43031e-05	6.89439e-05	8.43775e-09	5.30338e-05	0.0135032
k__Bacteria;p__Proteobacteria;c__Alphaproteobacteria;o__Sphingomonadales;f__Sphingomonadaceae;g__Erythrobacter;	1.59101e-05	2.53133e-10	9.18572e-06	0.000222742	2.83508e-08	9.72126e-05	0.0353871
k__Bacteria;p__Firmicutes;c__Clostridia;o__Peptostreptococcales-Tissierellales;f__Peptostreptococcaceae;g__Romboutsia;	3.18203e-05	2.53133e-10	9.18572e-06	0.000185618	5.40016e-09	4.2427e-05	0.00800215
k__Bacteria;p__Proteobacteria;c__Gammaproteobacteria;o__Burkholderiales;f__Rhodocyclaceae;g__Azonexus;	0.000190922	2.12631e-08	8.41885e-05	1.59101e-05	2.53133e-10	9.18572e-06	0.0374
k__Bacteria;p__Cyanobacteria;c__Cyanobacteriia;o__Cyanobacteriales;f__Chroococcidiopsaceae;g__Chroococcidiopsis_PCC_7203;	0.000185618	4.1345e-09	3.71237e-05	5.30338e-06	8.43775e-11	5.30338e-06	0.00444731
k__Bacteria;p__Proteobacteria;c__Gammaproteobacteria;o__Burkholderiales;f__Chromobacteriaceae;g__Aquitalea;	0.000143191	1.01253e-09	1.83714e-05	0	0	0	0.00183226
k__Bacteria;p__Bacteroidota;c__Bacteroidia;o__Chitinophagales;f__Chitinophagaceae;g__Parasegetibacter;	1.59101e-05	7.59398e-10	1.59101e-05	0.000111371	1.77193e-09	2.43031e-05	0.00971183
k__Bacteria;p__Firmicutes;c__Negativicutes;o__Veillonellales-Selenomonadales;f__Veillonellaceae;g__Veillonella;	0	0	0	9.54608e-05	5.31578e-09	4.20943e-05	0.0275204
k__Bacteria;p__Proteobacteria;c__Gammaproteobacteria;o__Enterobacterales;f__Yersiniaceae;g__Rahnella1;	7.42473e-05	5.90643e-10	1.40314e-05	1.06068e-05	8.43775e-11	5.30338e-06	0.00484731
k__Bacteria;p__Proteobacteria;c__Gammaproteobacteria;o__Burkholderiales;f__Alcaligenaceae;g__Bordetella;	7.42473e-05	3.3751e-10	1.06068e-05	0	0	0	0.00225376
k__Bacteria;p__Proteobacteria;c__Gammaproteobacteria;o__Burkholderiales;f__Rhodocyclaceae;g__Methyloversatilis;	1.59101e-05	2.53133e-10	9.18572e-06	5.30338e-05	8.43775e-11	5.30338e-06	0.0082129
k__Bacteria;p__Firmicutes;c__Bacilli;o__Erysipelotrichales;f__Erysipelotrichaceae;g__Turicibacter;	0	0	0	6.89439e-05	2.6157e-09	2.9528e-05	0.0258301
k__Bacteria;p__Proteobacteria;c__Alphaproteobacteria;o__Rhodobacterales;f__Rhodobacteraceae;g__Paracoccus;	1.06068e-05	3.3751e-10	1.06068e-05	5.30338e-05	3.3751e-10	1.06068e-05	0.0141914
k__Bacteria;p__Proteobacteria;c__Gammaproteobacteria;o__Burkholderiales;f__Rhodocyclaceae;g__Zoogloea;	5.83372e-05	1.60317e-09	2.31169e-05	0	0	0	0.0191011
k__Bacteria;p__Proteobacteria;c__Gammaproteobacteria;o__Burkholderiales;f__Oxalobacteraceae;g__Undibacterium;	4.77304e-05	2.53133e-10	9.18572e-06	5.30338e-06	8.43775e-11	5.30338e-06	0.00550108
k__Bacteria;p__Proteobacteria;c__Gammaproteobacteria;o__Burkholderiales;f__Comamonadaceae;g__Delftia;	5.30338e-06	8.43775e-11	5.30338e-06	3.71237e-05	5.90643e-10	1.40314e-05	0.0336989
k__Bacteria;p__Bacteroidota;c__Bacteroidia;o__Bacteroidales;f__Muribaculaceae;g__Muribaculaceae;	0	0	0	4.2427e-05	5.90643e-10	1.40314e-05	0.0118645
k__Bacteria;p__Bacteroidota;c__Bacteroidia;o__Cytophagales;f__Spirosomaceae;g__Lacihabitans;	4.2427e-05	3.3751e-10	1.06068e-05	0	0	0	0.00550108
k__Bacteria;p__Actinobacteriota;c__Thermoleophilia;o__Solirubrobacterales;f__67-14;g__67-14;	0	0	0	4.2427e-05	1.09691e-09	1.91216e-05	0.0292667
k__Bacteria;p__Proteobacteria;c__Gammaproteobacteria;o__Burkholderiales;f__Comamonadaceae;g__Comamonas;	1.06068e-05	8.43775e-11	5.30338e-06	3.18203e-05	2.53133e-10	9.18572e-06	0.0399226
k__Bacteria;p__Firmicutes;c__Negativicutes;o__Veillonellales-Selenomonadales;f__Selenomonadaceae;g__Megamonas;	0	0	0	3.71237e-05	5.90643e-10	1.40314e-05	0.0171677
k__Bacteria;p__Proteobacteria;c__Gammaproteobacteria;o__Burkholderiales;f__SC-I-84;g__SC-I-84;	5.30338e-06	8.43775e-11	5.30338e-06	3.18203e-05	2.53133e-10	9.18572e-06	0.0195355
k__Bacteria;p__Bacteroidota;c__Bacteroidia;o__Sphingobacteriales;f__Sphingobacteriaceae;g__Nubsella;	5.30338e-06	8.43775e-11	5.30338e-06	3.18203e-05	2.53133e-10	9.18572e-06	0.0195355
k__Bacteria;p__Proteobacteria;c__Gammaproteobacteria;o__Xanthomonadales;f__Xanthomonadaceae;g__Thermomonas;	2.65169e-05	8.43775e-11	5.30338e-06	1.06068e-05	8.43775e-11	5.30338e-06	0.0336989
k__Bacteria;p__Firmicutes;c__Clostridia;o__Oscillospirales;f__Butyricicoccaceae;g__Butyricicoccus;	0	0	0	3.18203e-05	7.59398e-10	1.59101e-05	0.0399226
k__Bacteria;p__Proteobacteria;c__Gammaproteobacteria;o__Burkholderiales;f__Oxalobacteraceae;g__Massilia;	0	0	0	3.18203e-05	2.53133e-10	9.18572e-06	0.00842366
k__Bacteria;p__Actinobacteriota;c__Actinobacteria;o__Corynebacteriales;f__Nocardiaceae;g__Rhodococcus;	3.18203e-05	2.53133e-10	9.18572e-06	0	0	0	0.00842366
k__Bacteria;p__Proteobacteria;c__Gammaproteobacteria;o__Burkholderiales;f__Chromobacteriaceae;g__Chromobacterium;	2.65169e-05	8.43775e-11	5.30338e-06	0	0	0	0.00365161
k__Bacteria;p__Proteobacteria;c__Alphaproteobacteria;o__Rhizobiales;f__D05-2;g__D05-2;	0	0	0	2.65169e-05	8.43775e-11	5.30338e-06	0.00365161
k__Bacteria;p__Proteobacteria;c__Gammaproteobacteria;o__Burkholderiales;f__Leeiaceae;g__Leeia;	2.12135e-05	8.43775e-11	5.30338e-06	0	0	0	0.00550108
k__Bacteria;p__Proteobacteria;c__Alphaproteobacteria;o__Sphingomonadales;f__Sphingomonadaceae;g__Sphingoaurantiacus;	0	0	0	2.12135e-05	3.3751e-10	1.06068e-05	0.0399226
k__Bacteria;p__Cyanobacteria;c__Cyanobacteriia;o__Leptolyngbyales;f__Leptolyngbyaceae;g__JSC-12;	2.12135e-05	8.43775e-11	5.30338e-06	0	0	0	0.00550108
k__Bacteria;p__Proteobacteria;c__Gammaproteobacteria;o__Burkholderiales;f__Methylophilaceae;g__Methylotenera;	1.59101e-05	0	0	0	0	0	0
